# Supplementary material
Source: PubMed Central journal article supplement (PMC1602339)
Supplement: amjpathol_166_2_455__1.pdf [file amjpathol_166_2_455__1.pdf]

**Supplementary Table 1.** Summary of expression changes and transcript statistics for Group A *Streptococcus* strainsMGAS5005 (WT) and JRS950 ( $\Delta covR$ ) during *ex vivo* blood culture

| Probe Set Name*      | Gene Name     | Synonym            | Category                | Subcategory                     | Function                        | <i>Bacillus subtilis</i> <sup>†</sup> | <i>Staphylococcus aureus</i> <sup>†</sup> | Difference Time (30 - 0) <sup>‡</sup> | Difference Time (60 - 0) <sup>‡</sup> | Difference Time (90 - 0) <sup>‡</sup> | Difference (Mut - WT) <sup>‡</sup> | P-value (Time) <sup>§</sup> | Q-value (Time) <sup>§</sup> | P-value (Strain) <sup>§</sup> | Q-value (Strain) <sup>§</sup> |
|----------------------|---------------|--------------------|-------------------------|---------------------------------|---------------------------------|---------------------------------------|-------------------------------------------|---------------------------------------|---------------------------------------|---------------------------------------|------------------------------------|-----------------------------|-----------------------------|-------------------------------|-------------------------------|
| SpM1_ChORF0036_s_at  | <i>purB</i>   | <i>spy0036</i>     | Nucleotides             | Nucleotides biosynthesis        | Purine biosynthesis             | -                                     | -                                         | 5819.27                               | 3424.22                               | 2767.77                               | -2023.16                           | 1.25E-30                    | <b>7.91E-06</b>             | 2.69E-16                      | <b>0.000225</b>               |
| SpM18_ChORF0030_s_at | -             | <i>spyM18_0030</i> | Nucleotides             | Nucleotides biosynthesis        | Purine biosynthesis             | -                                     | -                                         | 5446.91                               | 4091.73                               | 3905.77                               | -1975.02                           | 2.34E-33                    | <b>7.91E-06</b>             | 1.04E-15                      | <b>0.000225</b>               |
| SpM1_ChORF0026_s_at  | <i>purF</i>   | <i>spy0026</i>     | Nucleotides             | Nucleotides biosynthesis        | Purine biosynthesis             | -                                     | -                                         | 4959.61                               | 3525.50                               | 3364.98                               | -1856.19                           | 1.91E-34                    | <b>7.91E-06</b>             | 6.18E-17                      | <b>0.000225</b>               |
| SpM1_ChORF0427_s_at  | <i>nrdE.1</i> | <i>spy0427</i>     | Nucleotides             | Nucleotides biosynthesis        | Purine, pyrimidine biosynthesis | -                                     | -                                         | 4392.55                               | 4655.32                               | 3982.46                               | -3880.67                           | 1.49E-39                    | <b>7.91E-06</b>             | 3.39E-35                      | <b>0.000225</b>               |
| SpM1_ChORF1213_s_at  | <i>fhs.1</i>  | <i>spy1213</i>     | Carbohydrate metabolism | Carbohydrate central metabolism | Carbohydrate central metabolism | -                                     | -                                         | 3702.56                               | 2265.86                               | 1953.54                               | -830.69                            | 1.79E-36                    | <b>7.91E-06</b>             | 8.84E-13                      | <b>0.000225</b>               |
| SpM1_ChORF0747_s_at  | -             | <i>spy0747</i>     | Unknown                 | Hypothetical protein            | Unknown                         | -                                     | -                                         | 3662.12                               | 2834.61                               | 2842.98                               | -577.45                            | 2.37E-37                    | <b>7.91E-06</b>             | 2.53E-08                      | <b>0.000225</b>               |
| SpM1_ChORF1151_s_at  | <i>ldh</i>    | <i>spy1151</i>     | Carbohydrate metabolism | Carbohydrate central metabolism | Carbohydrate central metabolism | -                                     | -                                         | 3643.22                               | -1169.81                              | -1819.32                              | -1309.75                           | 9.78E-33                    | <b>7.91E-06</b>             | 2.33E-12                      | <b>0.000225</b>               |
| SpM1_ChORF1738_s_at  | <i>manL</i>   | <i>spy1738</i>     | Membrane transport      | Membrane transport              | Carbohydrate membrane transport | -                                     | -                                         | 3462.08                               | 3071.52                               | 1143.46                               | -107.98                            | 8.59E-28                    | <b>7.91E-06</b>             | 0.2197777                     | 0.048003                      |
| SpM1_ChORF1212_s_at  | -             | <i>spy1212</i>     | Cell envelope           | Membrane lipids                 | Phospholipids biosynthesis      | -                                     | -                                         | 3220.60                               | 1791.51                               | 1588.73                               | -942.84                            | 1.87E-30                    | <b>7.91E-06</b>             | 1.64E-13                      | <b>0.000225</b>               |
| SpM1_ChORF1136_s_at  | <i>xpt</i>    | <i>spy1136</i>     | Nucleotides             | Nucleotides metabolism          | Pyrimidine salvage              | -                                     | -                                         | 3148.82                               | 1566.65                               | 1324.91                               | -871.11                            | 5.10E-28                    | <b>7.91E-06</b>             | 2.46E-11                      | <b>0.000225</b>               |
| SpM1_ChORF0034_at    | <i>purK</i>   | <i>spy0034</i>     | Nucleotides             | Nucleotides biosynthesis        | Purine biosynthesis             | -                                     | -                                         | 3108.49                               | 2254.63                               | 2264.19                               | -1195.06                           | 1.18E-24                    | <b>7.91E-06</b>             | 1.40E-10                      | <b>0.000225</b>               |
| SpM1_ChORF0913_s_at  | -             | <i>spy0913</i>     | Protein synthesis       | Ribosomal proteins              | Ribosomal protein               | -                                     | -                                         | 2982.00                               | -2105.09                              | -2145.85                              | -1165.54                           | 1.27E-25                    | <b>7.91E-06</b>             | 2.12E-07                      | <b>0.000225</b>               |
| SpM1_ChORF0032_s_at  | <i>purD</i>   | <i>spy0032</i>     | Nucleotides             | Nucleotides biosynthesis        | Purine biosynthesis             | -                                     | -                                         | 2911.40                               | 2575.88                               | 2572.68                               | -1204.00                           | 1.34E-27                    | <b>7.91E-06</b>             | 1.34E-12                      | <b>0.000225</b>               |
| SpM1_ChORF0872_s_at  | -             | <i>spy0872</i>     | Unknown                 | Hypothetical protein            | Unknown                         | -                                     | -                                         | 2877.93                               | 1058.65                               | 437.42                                | -775.81                            | 1.64E-21                    | <b>7.91E-06</b>             | 7.92E-09                      | <b>0.000225</b>               |
| SpM1_ChORF1630_s_at  | -             | <i>spy1630</i>     | Unknown                 | Hypothetical protein            | Unknown                         | -                                     | -                                         | 2670.40                               | 1157.08                               | 458.27                                | -329.51                            | 5.36E-19                    | <b>7.91E-06</b>             | 0.0125647                     | 0.003535                      |
| SpM1_ChORF1137_s_at  | -             | <i>spy1137</i>     | Membrane transport      | Membrane transport              | Nucleotide membrane transport   | -                                     | -                                         | 2622.67                               | 1338.46                               | 1137.12                               | -770.82                            | 8.10E-30                    | <b>7.91E-06</b>             | 2.25E-12                      | <b>0.000225</b>               |
| SpM1_ChORF0038_s_at  | <i>ruvB</i>   | <i>spy0038</i>     | DNA metabolism          | Basic replication machinery     | DNA replication                 | -                                     | -                                         | 2618.47                               | 774.29                                | 422.24                                | -448.33                            | 5.47E-25                    | <b>7.91E-06</b>             | 9.65E-06                      | <b>0.000225</b>               |
| SpM1_ChORF0819_s_at  | <i>rplU</i>   | <i>spy0819</i>     | Protein synthesis       | Ribosomal proteins              | Ribosomal protein               | -                                     | -                                         | 2540.84                               | -1630.84                              | -1904.17                              | -802.62                            | 1.55E-25                    | <b>7.91E-06</b>             | 3.81E-05                      | <b>0.000225</b>               |
| SpM1_ChORF2202_s_at  | <i>hasC</i>   | <i>spy2202</i>     | Carbohydrate metabolism | Carbohydrate biosynthesis       |                                 | -                                     | -                                         | 2328.60                               | 2094.03                               | 749.35                                | 125.03                             | 8.16E-22                    | <b>7.91E-06</b>             | 0.8389557                     | 0.157328                      |
| SpM1_ChORF0027_s_at  | <i>purM</i>   | <i>spy0027</i>     | Nucleotides             | Nucleotides biosynthesis        | Purine biosynthesis             | -                                     | -                                         | 2255.57                               | 2072.59                               | 2282.94                               | -943.52                            | 1.76E-28                    | <b>7.91E-06</b>             | 1.55E-11                      | <b>0.000225</b>               |
| SpM18_ChORF0281_s_at | <i>oppA</i>   | <i>spyM18_0281</i> | Membrane transport      | Membrane transport              | Peptide membrane transport      | Essential                             | -                                         | 2231.19                               | 1191.30                               | -451.23                               | 649.27                             | 5.09E-16                    | <b>7.91E-06</b>             | 0.0093817                     | 0.002698                      |
| SpM1_ChORF0717_s_at  | <i>rpmE</i>   | <i>spy0717</i>     | Protein synthesis       | Ribosomal proteins              | Ribosomal protein               | -                                     | -                                         | 2135.86                               | -878.67                               | -1164.03                              | -970.84                            | 1.77E-22                    | <b>7.91E-06</b>             | 9.79E-09                      | <b>0.000225</b>               |
| SpM1_ChORF2110_s_at  | <i>nrdD</i>   | <i>spy2110</i>     | Nucleotides             | Nucleotides biosynthesis        | Purine biosynthesis             | -                                     | -                                         | 2017.45                               | 287.06                                | 5.07                                  | -2352.63                           | 1.23E-13                    | <b>7.91E-06</b>             | 2.00E-22                      | <b>0.000225</b>               |

| Probe Set Name*      | Gene Name   | Synonym            | Category                | Subcategory                     | Function                             | <i>Bacillus subtilis</i> † | <i>Staphylococcus aureus</i> † | Difference Time (30 - 0)‡ | Difference Time (60 - 0)‡ | Difference Time (90 - 0)‡ | Difference (Mut - WT)‡ | P-value (Time)§ | Q-value (Time)§ | P-value (Strain)§ | Q-value (Strain)§ |
|----------------------|-------------|--------------------|-------------------------|---------------------------------|--------------------------------------|----------------------------|--------------------------------|---------------------------|---------------------------|---------------------------|------------------------|-----------------|-----------------|-------------------|-------------------|
| SpM1_ChORF0033_s_at  | <i>purE</i> | <i>spy0033</i>     | Nucleotides             | Nucleotides biosynthesis        | Purine biosynthesis                  | -                          | -                              | 1979.03                   | 1865.95                   | 1903.38                   | -683.86                | 4.04E-28        | <b>7.91E-06</b> | 3.14E-10          | <b>0.000225</b>   |
| SpM1_ChORF1737_s_at  | -           | <i>spy1737</i>     | Unknown                 | Hypothetical protein            | Unknown                              | -                          | -                              | 1930.57                   | 187.24                    | -61.05                    | -194.55                | 1.44E-23        | <b>7.91E-06</b> | 0.0076713         | 0.00225           |
| SpM1_ChORF1227_s_at  | -           | <i>spy1227</i>     | Membrane transport      | Membrane transport              | Carbohydrate membrane transport      | -                          | -                              | 1905.91                   | 833.53                    | 311.10                    | -993.30                | 2.07E-20        | <b>7.91E-06</b> | 1.01E-16          | <b>0.000225</b>   |
| SpM1_ChORF2151_s_at  | <i>argS</i> | <i>spy2151</i>     | Protein synthesis       | tRNA synthetases                | tRNA synthetase                      | -                          | -                              | 1835.87                   | 1941.51                   | 646.00                    | -145.25                | 1.17E-22        | <b>7.91E-06</b> | 0.0291727         | 0.007668          |
| SpM1_ChORF0028_s_at  | <i>purN</i> | <i>spy0028</i>     | Nucleotides             | Nucleotides biosynthesis        | Purine biosynthesis                  | -                          | -                              | 1775.90                   | 1856.33                   | 2072.83                   | -799.62                | 1.28E-25        | <b>7.91E-06</b> | 1.43E-09          | <b>0.000225</b>   |
| SpM1_ChORF2195_s_at  | -           | <i>spy2195</i>     | Membrane transport      | Membrane transport              | Metal ion membrane transport         | -                          | -                              | 1764.52                   | 37.69                     | -329.40                   | -623.88                | 6.79E-22        | <b>7.91E-06</b> | 7.01E-10          | <b>0.000225</b>   |
| SpM1_ChORF2018_at    | <i>emm1</i> | <i>spy2018</i>     | Virulence               | Virulence interacting proteins  | Cell surface protein                 | -                          | -                              | 1751.35                   | 1330.77                   | 39.26                     | 32.20                  | 6.57E-15        | <b>7.91E-06</b> | 0.8347402         | 0.156705          |
| SpM1_ChORF1633_s_at  | -           | <i>spy1633</i>     | Unknown                 | Conserved protein               | Unknown                              | -                          | -                              | 1731.97                   | -469.55                   | -218.06                   | -312.24                | 6.63E-18        | <b>7.91E-06</b> | 0.019498          | 0.005337          |
| SpM1_ChORF2200_s_at  | <i>hasA</i> | <i>spy2200</i>     | Carbohydrate metabolism | Carbohydrate biosynthesis       |                                      | -                          | -                              | 1718.85                   | 1669.48                   | 832.09                    | 193.88                 | 1.09E-27        | <b>7.91E-06</b> | 0.0473426         | 0.011833          |
| SpM1_ChORF0035_at    | <i>abiR</i> | <i>spy0035</i>     | Other                   | Hypothetical Protein            | Hypothetical Cytosolic Protein       | -                          | -                              | 1571.88                   | 1753.09                   | 1883.59                   | -521.34                | 9.01E-27        | <b>7.91E-06</b> | 3.07E-08          | <b>0.000225</b>   |
| SpM1_ChORF1429_s_at  | <i>gpmA</i> | <i>spy1429</i>     | Carbohydrate metabolism | Carbohydrate central metabolism | Carbohydrate central metabolism      | -                          | -                              | 1552.23                   | 366.75                    | 231.91                    | -141.56                | 1.16E-13        | <b>7.91E-06</b> | 0.2799116         | 0.059726          |
| SpM1_ChORF1370_s_at  | -           | <i>spy1370</i>     | Cell envelope           | Cell wall                       |                                      | Essential                  | Essential                      | 1541.67                   | 179.64                    | -393.23                   | -467.70                | 1.57E-17        | <b>7.91E-06</b> | 4.74E-06          | <b>0.000225</b>   |
| SpM1_ChORF0453_s_at  | <i>mtsA</i> | <i>spy0453</i>     | Membrane transport      | Membrane transport              | Unknown substrate membrane transport | -                          | -                              | 1527.98                   | 694.28                    | 397.27                    | 300.18                 | 2.87E-14        | <b>7.91E-06</b> | 0.0423715         | 0.01069           |
| SpM18_ChORF2196_x_at | <i>rpmF</i> | <i>spyM18_2196</i> | Protein synthesis       | Ribosomal proteins              | Ribosomal protein                    | -                          | -                              | 1525.94                   | -1343.88                  | -1155.74                  | -676.94                | 2.91E-20        | <b>7.91E-06</b> | 7.29E-05          | <b>0.000225</b>   |
| SpM1_ChORF1135_s_at  | <i>guaC</i> | <i>spy1135</i>     | Nucleotides             | Nucleotides metabolism          | Purine salvage                       | -                          | -                              | 1494.58                   | 467.14                    | 338.04                    | -333.60                | 5.86E-25        | <b>7.91E-06</b> | 2.59E-08          | <b>0.000225</b>   |
| SpM1_ChORF1739_s_at  | <i>manM</i> | <i>spy1739</i>     | Membrane transport      | Membrane transport              | Carbohydrate membrane transport      | -                          | -                              | 1470.68                   | 2031.36                   | 794.39                    | -175.41                | 8.91E-23        | <b>7.91E-06</b> | 0.1002835         | 0.023526          |
| SpM18_ChORF2095_s_at | -           | <i>spyM18_2095</i> | Unknown                 | Hypothetical protein            | Unknown                              | -                          | -                              | 1449.03                   | 1444.39                   | 710.84                    | -295.19                | 8.95E-27        | <b>7.91E-06</b> | 8.10E-06          | <b>0.000225</b>   |
| SpM1_ChORF1888_s_at  | <i>rpmB</i> | <i>spy1888</i>     | Protein synthesis       | Ribosomal proteins              | Ribosomal protein                    | -                          | -                              | 1414.71                   | 211.38                    | -417.21                   | 91.20                  | 4.43E-21        | <b>7.91E-06</b> | 0.2999355         | 0.063498          |
| SpM1_ChORF1931_s_at  | <i>rpsI</i> | <i>spy1931</i>     | Protein synthesis       | Ribosomal proteins              | Ribosomal protein                    | -                          | -                              | 1405.89                   | -65.02                    | -107.08                   | -185.80                | 6.89E-22        | <b>7.91E-06</b> | 0.0925286         | 0.021868          |
| SpM1_ChORF1676_s_at  | <i>tkt</i>  | <i>spy1676</i>     | Carbohydrate metabolism | Bioenergetics                   | Glycolysis                           | -                          | -                              | 1405.04                   | 1245.34                   | 729.19                    | -670.86                | 5.53E-12        | <b>7.91E-06</b> | 1.39E-07          | <b>0.000225</b>   |
| SpM1_ChORF1200_s_at  | <i>ffh</i>  | <i>spy1200</i>     | Protein synthesis       | Protein translocation           | Protein secretion                    | -                          | -                              | 1380.98                   | 124.43                    | 75.06                     | -493.45                | 3.05E-12        | <b>7.91E-06</b> | 1.41E-05          | <b>0.000225</b>   |
| SpM1_ChORF0416_s_at  | <i>prtS</i> | <i>spy0416</i>     | Amino acid metabolism   | Amino acid catabolism           | Amino acid catabolism                | -                          | -                              | 1317.28                   | 2110.30                   | 1599.00                   | -694.65                | 2.15E-08        | <b>7.91E-06</b> | 0.0008133         | <b>0.000352</b>   |
| SpM1_ChORF1865_s_at  | -           | <i>spy1865</i>     | Unknown                 | Hypothetical cytosolic Protein  | Unknown                              | -                          | -                              | 1283.89                   | 690.84                    | 535.91                    | 211.67                 | 1.80E-19        | <b>7.91E-06</b> | 0.0035523         | 0.001098          |
| SpM1_ChORF1896_s_at  | <i>ropA</i> | <i>spy1896</i>     | Protein synthesis       | Protein translocation           | Protein secretion                    | -                          | -                              | 1263.93                   | 57.18                     | -68.35                    | -102.83                | 2.74E-20        | <b>7.91E-06</b> | 0.0347446         | 0.008962          |

| Probe Set Name*         | Gene Name     | Synonym                             | Category                | Subcategory                            | Function                               | <i>Bacillus subtilis</i> † | <i>Staphylococcus aureus</i> † | Difference Time (30 - 0)‡ | Difference Time (60 - 0)‡ | Difference Time (90 - 0)‡ | Difference (Mut - WT)‡ | P-value (Time)§ | Q-value (Time)§ | P-value (Strain)§ | Q-value (Strain)§ |
|-------------------------|---------------|-------------------------------------|-------------------------|----------------------------------------|----------------------------------------|----------------------------|--------------------------------|---------------------------|---------------------------|---------------------------|------------------------|-----------------|-----------------|-------------------|-------------------|
| SpM1_ChORF0067_s_at     | <i>rpIR</i>   | <i>spy0067</i>                      | Protein synthesis       | Ribosomal proteins                     | Ribosomal protein                      | -                          | -                              | 1210.04                   | -189.19                   | -1101.22                  | -506.59                | 2.78E-14        | <b>7.91E-06</b> | 0.0086781         | 0.002523          |
| SpM1_ChORF0019_s_at     | <i>sibA</i>   | <i>spy0019</i>                      | Cell envelope           | Cell wall                              | Peptidoglycan biosynthesis             | -                          | -                              | 1209.73                   | 197.39                    | 407.45                    | -82.43                 | 8.84E-24        | <b>7.91E-06</b> | 0.0846279         | 0.020081          |
| SpM49_ChORF8094-13_s_at | -             | <i>spy0025</i>                      | Unknown                 | Hypothetical protein                   | Unknown                                | -                          | -                              | 1208.00                   | 1011.92                   | 1068.61                   | -448.49                | 4.59E-27        | <b>7.91E-06</b> | 2.39E-09          | <b>0.000225</b>   |
| SpM1_ChORF1805_s_at     | <i>secA</i>   | <i>spy1805</i>                      | Protein synthesis       | Protein translocation                  | Protein secretion                      | -                          | -                              | 1180.14                   | 15.19                     | -450.26                   | -876.69                | 6.17E-17        | <b>7.91E-06</b> | 1.11E-13          | <b>0.000225</b>   |
| SpM1_ChORF1499_s_at     | <i>xseB</i>   | <i>spy1499</i>                      | DNA metabolism          | DNA replication, modification & repair | DNA replication, modification & repair | -                          | -                              | 1163.22                   | 1174.05                   | 360.42                    | 199.90                 | 4.17E-24        | <b>7.91E-06</b> | 0.0092572         | 0.002667          |
| SpM12_ChORF248-4_s_at   | -             | <i>SpyoM12_Chr ORF_248_4</i>        | Unknown                 | Hypothetical protein                   | Unknown                                | Essential                  | Essential                      | 1141.44                   | 1302.21                   | -144.11                   | 22.44                  | 7.00E-10        | <b>7.91E-06</b> | 0.8622871         | 0.160589          |
| SpM1_ChORF1419_s_at     | -             | <i>spy1419</i>                      | Unknown                 | Hypothetical membrane protein          | Unknown                                | -                          | -                              | 1126.31                   | 127.50                    | -34.62                    | -44.31                 | 4.43E-10        | <b>7.91E-06</b> | 0.5559057         | 0.111001          |
| SpM1_ChORF1882_s_at     | <i>lppC</i>   | <i>spy1882</i>                      | Unknown                 | Hypothetical protein                   | Unknown                                | -                          | -                              | 1123.00                   | 1674.65                   | 1534.75                   | 120.15                 | 6.41E-20        | <b>7.91E-06</b> | 0.7768576         | 0.147493          |
| SpM1_ChORF1507_s_at     | -             | <i>spy1507</i>                      | Membrane transport      | Membrane transport                     | Amino acid membrane transport          | -                          | -                              | 1107.74                   | 740.42                    | 548.86                    | -242.42                | 5.42E-16        | <b>7.91E-06</b> | 0.0007491         | <b>0.000338</b>   |
| SpM1_ChORF1508_s_at     | -             | <i>spy1508</i>                      | Unknown                 | Hypothetical protein                   | Unknown                                | -                          | -                              | 1100.98                   | 296.61                    | 95.46                     | 197.45                 | 4.94E-28        | <b>7.91E-06</b> | 2.87E-05          | <b>0.000225</b>   |
| SpM1_ChORF0425_s_at     | <i>nrdF.1</i> | <i>spy0425</i>                      | Nucleotides             | Nucleotides biosynthesis               | Purine, pyrimidine biosynthesis        | -                          | -                              | 1088.03                   | 639.45                    | 592.72                    | -816.26                | 7.00E-33        | <b>7.91E-06</b> | 4.75E-32          | <b>0.000225</b>   |
| SpM5_ChORF466b-1_s_at   | <i>purC</i>   | <i>SpyoM5_Chr ORF_466b09.s1ck_1</i> | Nucleotides             | Nucleotides biosynthesis               | Purine biosynthesis                    | -                          | -                              | 1082.97                   | -770.64                   | -46.87                    | 1228.19                | 8.13E-05        | <b>8.15E-06</b> | 1.51E-05          | <b>0.000225</b>   |
| SpM1_ChORF0900_s_at     | <i>pyrF</i>   | <i>spy0900</i>                      | Nucleotides             | Nucleotides biosynthesis               | Pyrimidine biosynthesis                | -                          | -                              | 1068.10                   | -424.93                   | -1114.03                  | -159.83                | 1.72E-15        | <b>7.91E-06</b> | 0.6773367         | 0.131567          |
| SpM1_ChORF2201_s_at     | <i>hasB</i>   | <i>spy2201</i>                      | Carbohydrate metabolism | Carbohydrate biosynthesis              |                                        | -                          | -                              | 1062.91                   | 1321.34                   | 676.13                    | 252.37                 | 1.59E-16        | <b>7.91E-06</b> | 0.0147374         | 0.00411           |
| SpM1_ChORF0056_s_at     | <i>rpsC</i>   | <i>spy0056</i>                      | Protein synthesis       | Ribosomal proteins                     | Ribosomal protein                      | -                          | -                              | 1049.10                   | -1425.47                  | -2444.27                  | -1067.98               | 6.62E-17        | <b>7.91E-06</b> | 6.41E-05          | <b>0.000225</b>   |
| SpM1_ChORF1727_s_at     | -             | <i>spy1727</i>                      | Unknown                 | Hypothetical protein                   | Unknown                                | -                          | -                              | 1025.25                   | 697.56                    | -59.04                    | -128.87                | 5.91E-17        | <b>7.91E-06</b> | 0.0185012         | 0.005088          |
| SpM1_ChORF0810_s_at     | <i>aroF</i>   | <i>spy0810</i>                      | Amino acid metabolism   | Amino acid biosynthesis                | Amino acid biosynthesis                | -                          | -                              | 988.77                    | -349.66                   | -517.54                   | -667.90                | 1.35E-13        | <b>7.91E-06</b> | 2.90E-08          | <b>0.000225</b>   |
| SpM1_ChORF2009_at       | <i>fba</i>    | <i>spy2009</i>                      | Virulence               | Virulence interacting proteins         | Cell surface protein                   | -                          | -                              | 987.34                    | 82.35                     | -1323.38                  | -1222.96               | 6.23E-16        | <b>7.91E-06</b> | 6.41E-12          | <b>0.000225</b>   |
| SpM1_ChORF0215_s_at     | <i>pgi</i>    | <i>spy0215</i>                      | Carbohydrate metabolism | Bioenergetics                          | Glycolysis                             | Essential                  | -                              | 982.71                    | 732.71                    | 320.63                    | -265.06                | 4.23E-28        | <b>7.91E-06</b> | 1.10E-09          | <b>0.000225</b>   |
| SpM1_ChORF0061_s_at     | <i>rpIN</i>   | <i>spy0061</i>                      | Protein synthesis       | Ribosomal proteins                     | Ribosomal protein                      | -                          | -                              | 957.27                    | -914.85                   | -1731.07                  | -774.97                | 6.82E-15        | <b>7.91E-06</b> | 0.0008144         | <b>0.000352</b>   |
| SpM1_ChORF0345_s_at     | <i>murC</i>   | <i>spy0345</i>                      | Cell envelope           | Cell wall                              | Peptidoglycan biosynthesis             | Essential                  | Essential                      | 944.57                    | 304.72                    | 170.64                    | -273.10                | 1.05E-12        | <b>7.91E-06</b> | 0.0002193         | <b>0.00024</b>    |
| SpM1_ChORF1432_s_at     | <i>pyrD</i>   | <i>spy1432</i>                      | Nucleotides             | Nucleotides biosynthesis               | Pyrimidine biosynthesis                | -                          | -                              | 934.76                    | -66.04                    | -326.97                   | 11.64                  | 3.99E-20        | <b>7.91E-06</b> | 0.4679213         | 0.095328          |
| SpM1_ChORF1968_s_at     | -             | <i>spy1968</i>                      | Unknown                 | Hypothetical membrane protein          | Unknown                                | -                          | -                              | 932.10                    | -558.19                   | -1233.67                  | -464.44                | 8.44E-23        | <b>7.91E-06</b> | 4.09E-07          | <b>0.000225</b>   |
| SpM1_ChORF0901_s_at     | <i>pyrE</i>   | <i>spy0901</i>                      | Nucleotides             | Nucleotides biosynthesis               | Pyrimidine biosynthesis                | -                          | -                              | 890.33                    | -529.05                   | -1167.87                  | -174.79                | 3.49E-13        | <b>7.91E-06</b> | 0.6181645         | 0.121703          |

| Probe Set Name*     | Gene Name   | Synonym         | Category                | Subcategory                            | Function                               | <i>Bacillus subtilis</i> <sup>†</sup> | <i>Staphylococcus aureus</i> <sup>†</sup> | Difference Time (30 - 0) <sup>‡</sup> | Difference Time (60 - 0) <sup>‡</sup> | Difference Time (90 - 0) <sup>‡</sup> | Difference (Mut - WT) <sup>‡</sup> | P-value (Time) <sup>§</sup> | Q-value (Time) <sup>§</sup> | P-value (Strain) <sup>§</sup> | Q-value (Strain) <sup>§</sup> |
|---------------------|-------------|-----------------|-------------------------|----------------------------------------|----------------------------------------|---------------------------------------|-------------------------------------------|---------------------------------------|---------------------------------------|---------------------------------------|------------------------------------|-----------------------------|-----------------------------|-------------------------------|-------------------------------|
| SpM1_ChORF0324_s_at | -           | <i>spy0324</i>  | Membrane transport      | Membrane transport                     | Ion membrane transport                 | -                                     | -                                         | 889.10                                | 605.85                                | 661.51                                | -106.51                            | 1.02E-31                    | <b>7.91E-06</b>             | 0.002158                      | 0.000709                      |
| SpM1_ChORF1740_s_at | <i>manN</i> | <i>spy1740</i>  | Membrane transport      | Membrane transport                     | Carbohydrate membrane transport        | -                                     | -                                         | 857.42                                | 1349.36                               | 480.16                                | -211.10                            | 1.80E-19                    | <b>7.91E-06</b>             | 0.005128                      | 0.001544                      |
| SpM1_ChORF1392_s_at | -           | <i>spy1392</i>  | Membrane transport      | Membrane transport                     | Carbohydrate membrane transport        | -                                     | -                                         | 847.60                                | 349.12                                | 325.37                                | -315.10                            | 1.80E-13                    | <b>7.91E-06</b>             | 1.97E-07                      | <b>0.000225</b>               |
| SpM1_ChORF1357_s_at | <i>grab</i> | <i>spy1357</i>  | Virulence               | Virulence interacting proteins         | Cell surface protein                   | -                                     | -                                         | 847.07                                | 464.77                                | -127.54                               | 6984.78                            | 4.14E-08                    | <b>7.91E-06</b>             | 2.96E-62                      | <b>0.000225</b>               |
| SpM1_ChORF0072_s_at | <i>rplO</i> | <i>spy0072</i>  | Protein synthesis       | Ribosomal proteins                     | Ribosomal protein                      | -                                     | -                                         | 839.65                                | -70.07                                | -638.56                               | -185.55                            | 8.12E-09                    | <b>7.91E-06</b>             | 0.5634879                     | 0.112323                      |
| SpM1_ChORF1228_s_at | -           | <i>spy1228</i>  | Unknown                 | Hypothetical protein                   | Unknown                                | -                                     | -                                         | 834.68                                | 598.29                                | 605.12                                | -84.64                             | 1.00E-11                    | <b>7.91E-06</b>             | 0.1620818                     | 0.036234                      |
| SpM1_ChORF1500_s_at | <i>xseA</i> | <i>spy1500</i>  | DNA metabolism          | DNA replication, modification & repair | DNA replication, modification & repair | -                                     | -                                         | 819.32                                | 606.60                                | 238.17                                | 157.22                             | 1.10E-22                    | <b>7.91E-06</b>             | 0.0009993                     | <b>0.000395</b>               |
| SpM1_ChORF1520_s_at | <i>ftsZ</i> | <i>spy1520</i>  | Cell shape and division | Cell shape & division                  | Cell division                          | -                                     | -                                         | 810.60                                | -701.28                               | -2071.14                              | -569.16                            | 1.91E-20                    | <b>7.91E-06</b>             | 6.43E-05                      | <b>0.000225</b>               |
| SpM1_ChORF0608_s_at | <i>ppc</i>  | <i>spy0608</i>  | Carbohydrate metabolism |                                        |                                        | -                                     | -                                         | 808.71                                | 9.93                                  | -378.62                               | -572.64                            | 1.37E-16                    | <b>7.91E-06</b>             | 2.87E-13                      | <b>0.000225</b>               |
| SpM1_ChORF0378_s_at | <i>hlyX</i> | <i>spy0378</i>  | Virulence               | Virulence interacting proteins         | Exotoxin                               | -                                     | -                                         | 792.90                                | 388.33                                | 351.70                                | -35.27                             | 1.63E-20                    | <b>7.91E-06</b>             | 0.2203844                     | 0.048067                      |
| SpM1_ChORF0595_s_at | <i>lysS</i> | <i>spy0595</i>  | Protein synthesis       | tRNA synthetases                       | tRNA synthetase                        | -                                     | -                                         | 784.86                                | 174.65                                | -5.45                                 | -200.75                            | 2.94E-22                    | <b>7.91E-06</b>             | 2.44E-07                      | <b>0.000225</b>               |
| SpM1_ChORF1234_s_at | <i>rpsT</i> | <i>spy1234</i>  | Protein synthesis       | Ribosomal proteins                     | Ribosomal protein                      | -                                     | -                                         | 767.59                                | 178.13                                | 16.08                                 | -19.84                             | 1.24E-22                    | <b>7.91E-06</b>             | 0.574184                      | 0.114067                      |
| SpM1_ChORF1494_s_at | -           | <i>spy1494</i>  | Unknown                 | Hypothetical protein                   | Unknown                                | -                                     | -                                         | 765.99                                | 876.58                                | 561.92                                | -31.76                             | 5.20E-20                    | <b>7.91E-06</b>             | 0.399717                      | 0.082631                      |
| SpM1_ChORF0949_s_at | -           | <i>spy0949</i>  | Phage                   | Phage proteins                         | Hypothetical cytosolic protein         | -                                     | -                                         | 764.03                                | 1105.72                               | 1243.41                               | -496.06                            | 2.60E-24                    | <b>7.91E-06</b>             | 1.50E-11                      | <b>0.000225</b>               |
| SpM1_ChORF2016_at   | <i>sic</i>  | <i>spy2016</i>  | Virulence               | Virulence interacting proteins         | Extracellular protein                  | -                                     | -                                         | 761.00                                | 1288.05                               | 785.37                                | -373.14                            | 2.11E-05                    | <b>7.91E-06</b>             | 0.0183439                     | 0.005048                      |
| SpM1_ChORF0116_at   | -           | <i>spy0116</i>  | Unknown                 | Hypothetical protein                   | Unknown                                | -                                     | -                                         | 758.55                                | 1139.82                               | 925.69                                | -242.86                            | 3.75E-12                    | <b>7.91E-06</b>             | 0.0280536                     | 0.007407                      |
| SpM1_ChORF1276_s_at | -           | <i>spy1276</i>  | Membrane transport      | Membrane transport                     | Amino acid membrane transport          | Essential                             | Essential                                 | 741.96                                | 642.41                                | 494.44                                | -273.90                            | 7.41E-14                    | <b>7.91E-06</b>             | 1.15E-05                      | <b>0.000225</b>               |
| SpM1_ChORF0426_s_at | <i>nrdI</i> | <i>spy0426</i>  | Nucleotides             | Nucleotides biosynthesis               | Purine, pyrimidine biosynthesis        | -                                     | -                                         | 740.89                                | 569.04                                | 587.92                                | -659.62                            | 1.11E-25                    | <b>7.91E-06</b>             | 1.42E-25                      | <b>0.000225</b>               |
| SpM1_ChORF0460_s_at | <i>rplK</i> | <i>spy0460</i>  | Protein synthesis       | Ribosomal proteins                     | Ribosomal protein                      | -                                     | -                                         | 733.50                                | -76.01                                | 194.56                                | 56.49                              | 2.75E-15                    | <b>7.91E-06</b>             | 0.0814453                     | 0.019379                      |
| SpM1_ChORF2092_s_at | <i>rpsB</i> | <i>spy2092</i>  | Protein synthesis       | Ribosomal proteins                     | Ribosomal protein                      | -                                     | -                                         | 722.03                                | -246.08                               | -116.20                               | -51.59                             | 9.77E-17                    | <b>7.91E-06</b>             | 0.8216591                     | 0.155078                      |
| SpM1_ChORF0122_s_at | -           | <i>spy0122</i>  | RNA metabolism          | Transcription r                        | egulation                              | -                                     | -                                         | 711.51                                | -23.87                                | -164.11                               | -501.50                            | 7.37E-16                    | <b>7.91E-06</b>             | 5.84E-12                      | <b>0.000225</b>               |
| M12_0671_s_at       | -           | <i>M12_0671</i> | Unknown                 | Hypothetical protein                   | Unknown                                | -                                     | -                                         | 685.05                                | -229.17                               | -349.89                               | -4.17                              | 3.81E-25                    | <b>7.91E-06</b>             | 0.6872696                     | 0.133219                      |

| Probe Set Name*       | Gene Name     | Synonym                             | Category                | Subcategory                            | Function                               | <i>Bacillus subtilis</i> † | <i>Staphylococcus aureus</i> † | Difference Time (30 - 0)‡ | Difference Time (60 - 0)‡ | Difference Time (90 - 0)‡ | Difference (Mut - WT)‡ | P-value (Time)§ | Q-value (Time)§ | P-value (Strain)§ | Q-value (Strain)§ |
|-----------------------|---------------|-------------------------------------|-------------------------|----------------------------------------|----------------------------------------|----------------------------|--------------------------------|---------------------------|---------------------------|---------------------------|------------------------|-----------------|-----------------|-------------------|-------------------|
| SpM1_ChORF0136_s_at   | -             | <i>spy0136</i>                      | Unknown                 | Hypothetical extracellular protein     | Unknown                                | -                          | -                              | 685.03                    | 456.95                    | -230.94                   | 2033.42                | 1.01E-16        | <b>7.91E-06</b> | 1.95E-43          | <b>0.000225</b>   |
| SpM1_ChORF1632_s_at   | <i>gmk</i>    | <i>spy1632</i>                      | Nucleotides             | Nucleotides biosynthesis               | Purine biosynthesis                    | -                          | -                              | 673.21                    | 394.18                    | 340.08                    | -13.71                 | 9.40E-20        | <b>7.91E-06</b> | 0.4732196         | 0.096158          |
| SpM1_ChORF1653_s_at   | <i>nadE</i>   | <i>spy1652</i>                      | Cofactors               | NAD                                    | NAD biosynthesis                       | -                          | -                              | 671.38                    | 1016.61                   | 946.05                    | -249.83                | 5.35E-30        | <b>7.91E-06</b> | 9.70E-10          | <b>0.000225</b>   |
| SpM1_ChORF0911_s_at   | <i>bcaT</i>   | <i>spy0911</i>                      | Carbohydrate metabolism |                                        |                                        | -                          | -                              | 662.81                    | 636.03                    | 44.64                     | 397.68                 | 4.29E-20        | <b>7.91E-06</b> | 3.39E-13          | <b>0.000225</b>   |
| SpM1_ChORF1946_s_at   | <i>pnpA</i>   | <i>spy1946</i>                      | Unknown                 | Hypothetical protein                   | Unknown                                | Essential                  | Essential                      | 658.18                    | 62.34                     | -462.65                   | -474.86                | 9.86E-15        | <b>7.91E-06</b> | 1.35E-08          | <b>0.000225</b>   |
| SpM1_ChORF1894_s_at   | <i>pyrG</i>   | <i>spy1894</i>                      | Nucleotides             | Nucleotides biosynthesis               | Pyrimidine biosynthesis                | -                          | -                              | 656.28                    | -93.75                    | -38.15                    | -303.36                | 4.11E-17        | <b>7.91E-06</b> | 5.42E-07          | <b>0.000225</b>   |
| SpM1_ChORF2206_s_at   | <i>guaB</i>   | <i>spy2206</i>                      | Nucleotides             | Nucleotides biosynthesis               | Purine biosynthesis                    | -                          | -                              | 654.63                    | 604.13                    | 133.73                    | -468.00                | 1.52E-10        | <b>7.91E-06</b> | 2.93E-09          | <b>0.000225</b>   |
| SpM5_ChORF275f-5_s_at | -             | <i>SpyoM5_Chr ORF_275f02.p1cq_5</i> | Unknown                 | Hypothetical protein                   | Unknown                                | -                          | -                              | 654.17                    | 266.18                    | 139.45                    | -140.26                | 3.56E-18        | <b>7.91E-06</b> | 2.60E-05          | <b>0.000225</b>   |
| SpM1_ChORF2205_s_at   | -             | <i>spy2205</i>                      | Membrane transport      | Membrane transport                     | Unknown substrate membrane transport   | -                          | -                              | 653.17                    | 394.65                    | 353.44                    | -543.50                | 8.09E-13        | <b>7.91E-06</b> | 1.63E-16          | <b>0.000225</b>   |
| SpM1_ChORF2156_s_at   | <i>aspS</i>   | <i>spy2156</i>                      | Protein synthesis       | tRNA synthetases                       | tRNA synthetase                        | -                          | -                              | 649.03                    | 238.82                    | 2.80                      | -390.08                | 1.41E-13        | <b>7.91E-06</b> | 1.17E-10          | <b>0.000225</b>   |
| SpM1_ChORF1495_s_at   | <i>recN</i>   | <i>spy1495</i>                      | DNA metabolism          | DNA replication, modification & repair | DNA replication, modification & repair | -                          | -                              | 643.26                    | 916.60                    | 415.84                    | -4.11                  | 8.83E-20        | <b>7.91E-06</b> | 0.8502085         | 0.158845          |
| SpM1_ChORF0165_s_at   | <i>nga</i>    | <i>spy0165</i>                      | Virulence               | Virulence interacting proteins         | Exotoxin                               | -                          | -                              | 637.46                    | 478.78                    | -15.28                    | 98.48                  | 4.16E-09        | <b>7.91E-06</b> | 0.4211394         | 0.086651          |
| SpM1_ChORF0721_s_at   | -             | <i>spy0721</i>                      | Carbohydrate metabolism | Bioenergetics                          |                                        | -                          | -                              | 625.53                    | -21.83                    | 29.00                     | -85.19                 | 1.13E-14        | <b>7.91E-06</b> | 0.0387526         | 0.009895          |
| SpM1_ChORF0469_s_at   | -             | <i>spy0469</i>                      | Virulence               | Virulence interacting proteins         | Cell surface protein                   | -                          | -                              | 622.91                    | 198.13                    | 246.21                    | -160.76                | 2.37E-17        | <b>7.91E-06</b> | 3.82E-05          | <b>0.000225</b>   |
| SpM1_ChORF0857_s_at   | <i>mur1.2</i> | <i>spy0857</i>                      | Cell envelope           | Cell wall                              | Peptidoglycan biosynthesis             | -                          | -                              | 620.65                    | 151.14                    | 132.72                    | -71.46                 | 7.00E-26        | <b>7.91E-06</b> | 0.0003526         | <b>0.000261</b>   |
| SpM1_ChORF1020_s_at   | -             | <i>spy1020</i>                      | Unknown                 | Conserved protein                      | Unknown                                | Essential                  | -                              | 615.01                    | 505.59                    | -334.93                   | -148.08                | 5.53E-08        | <b>7.91E-06</b> | 0.0694025         | 0.016798          |
| SpM1_ChORF0348_s_at   | -             | <i>spy0348</i>                      | Unknown                 | Hypothetical protein                   | Unknown                                | Essential                  | -                              | 611.40                    | 223.72                    | 309.06                    | -462.86                | 2.34E-09        | <b>7.91E-06</b> | 9.67E-12          | <b>0.000225</b>   |
| SpM1_ChORF0047_s_at   | <i>rpsJ</i>   | <i>spy0047</i>                      | Protein synthesis       | Ribosomal proteins                     | Ribosomal protein                      | Essential                  | -                              | 601.48                    | -188.28                   | -81.18                    | -143.03                | 6.84E-18        | <b>7.91E-06</b> | 0.0085454         | 0.00249           |
| SpM1_ChORF0057_s_at   | <i>rpIP</i>   | <i>spy0057</i>                      | Protein synthesis       | Ribosomal proteins                     | Ribosomal protein                      | -                          | -                              | 596.04                    | -1326.25                  | -1858.28                  | -774.20                | 1.32E-15        | <b>7.91E-06</b> | 0.000916          | <b>0.000375</b>   |
| SpM1_ChORF0589_s_at   | -             | <i>spy0589</i>                      | Unknown                 | Hypothetical protein                   | Unknown                                | -                          | -                              | 584.87                    | 19.65                     | 0.43                      | 57.40                  | 1.20E-21        | <b>7.91E-06</b> | 0.0406809         | 0.010315          |
| SpM1_ChORF2197_s_at   | -             | <i>spy2197</i>                      | Unknown                 | Hypothetical membrane protein          | Unknown                                | -                          | -                              | 581.80                    | 7.48                      | -233.94                   | -156.31                | 1.23E-22        | <b>7.91E-06</b> | 3.27E-06          | <b>0.000225</b>   |
| SpM1_ChORF1875_s_at   | -             | <i>spy1875</i>                      | Unknown                 | Hypothetical cytosolic Protein         | Unknown                                | -                          | -                              | 576.57                    | 265.89                    | 276.44                    | -165.89                | 4.98E-14        | <b>7.91E-06</b> | 2.78E-05          | <b>0.000225</b>   |

| Probe Set Name*      | Gene Name   | Synonym        | Category                | Subcategory                    | Function                             | <i>Bacillus subtilis</i> <sup>†</sup> | <i>Staphylococcus aureus</i> <sup>†</sup> | Difference Time (30 - 0) <sup>‡</sup> | Difference Time (60 - 0) <sup>‡</sup> | Difference Time (90 - 0) <sup>‡</sup> | Difference (Mut - WT) <sup>‡</sup> | P-value (Time) <sup>§</sup> | Q-value (Time) <sup>§</sup> | P-value (Strain) <sup>§</sup> | Q-value (Strain) <sup>§</sup> |
|----------------------|-------------|----------------|-------------------------|--------------------------------|--------------------------------------|---------------------------------------|-------------------------------------------|---------------------------------------|---------------------------------------|---------------------------------------|------------------------------------|-----------------------------|-----------------------------|-------------------------------|-------------------------------|
| SpM1_ChORF1830_s_at  | <i>ssb2</i> | <i>spy1830</i> | DNA metabolism          | Basic replication machinery    | DNA replication                      | -                                     | -                                         | 575.81                                | -724.60                               | -1013.36                              | -182.70                            | 2.44E-11                    | <b>7.91E-06</b>             | 0.1208216                     | 0.027788                      |
| SpM1_ChORF0108_s_at  | -           | <i>spy0108</i> | Unknown                 | Hypothetical protein           | Unknown                              | -                                     | -                                         | 572.66                                | 45.77                                 | -73.17                                | -139.28                            | 6.04E-22                    | <b>7.91E-06</b>             | 1.02E-06                      | <b>0.000225</b>               |
| SpM1_ChORF0093_s_at  | <i>adcC</i> | <i>spy0093</i> | Membrane transport      | Membrane transport             | Metal ion membrane transport         | Essential                             | Essential                                 | 571.71                                | 195.63                                | 236.99                                | -214.14                            | 4.17E-22                    | <b>7.91E-06</b>             | 1.11E-10                      | <b>0.000225</b>               |
| SpM1_ChORF0064_s_at  | <i>rpsN</i> | <i>spy0064</i> | Protein synthesis       | Ribosomal proteins             | Ribosomal protein                    | -                                     | -                                         | 565.93                                | -218.41                               | -928.86                               | -433.16                            | 2.40E-09                    | <b>7.91E-06</b>             | 0.0264336                     | 0.007022                      |
| SpM1_ChORF0096_s_at  | <i>tyrS</i> | <i>spy0096</i> | Protein synthesis       | tRNA synthetases               | tRNA synthetase                      | -                                     | -                                         | 560.64                                | 209.97                                | -330.93                               | -574.42                            | 5.78E-18                    | <b>7.91E-06</b>             | 8.39E-17                      | <b>0.000225</b>               |
| SpM1_ChORF0276_s_at  | -           | <i>spy0276</i> | Membrane transport      | Membrane transport             | Amino acid membrane transport        | -                                     | -                                         | 556.03                                | 84.74                                 | -132.24                               | -320.84                            | 1.44E-12                    | <b>7.91E-06</b>             | 7.39E-09                      | <b>0.000225</b>               |
| SpM1_ChORF0268_s_at  | <i>purR</i> | <i>spy0268</i> | RNA metabolism          | Transcription regulation       |                                      | Essential                             | Essential                                 | 553.46                                | 666.09                                | 422.20                                | 216.39                             | 3.51E-19                    | <b>7.91E-06</b>             | 1.29E-06                      | <b>0.000225</b>               |
| SpM1_ChORF1736_s_at  | -           | <i>spy1736</i> | Membrane transport      | Membrane transport             | Nucleotide membrane transport        | -                                     | -                                         | 544.76                                | 275.59                                | 445.20                                | -246.77                            | 6.86E-18                    | <b>7.91E-06</b>             | 7.52E-10                      | <b>0.000225</b>               |
| SpM18_ChORF1226_s_at | -           | <i>spy1277</i> | Unknown                 | Hypothetical protein           | Unknown                              | -                                     | -                                         | 543.24                                | 85.45                                 | 153.41                                | -78.58                             | 3.25E-13                    | <b>7.91E-06</b>             | 0.0330292                     | 0.008566                      |
| SpM1_ChORF0160_s_at  | <i>purA</i> | <i>spy0160</i> | Nucleotides             | Nucleotides biosynthesis       | Purine biosynthesis                  | -                                     | -                                         | 543.21                                | 400.61                                | -146.47                               | -460.84                            | 1.02E-11                    | <b>7.91E-06</b>             | 2.48E-10                      | <b>0.000225</b>               |
| SpM1_ChORF1489_s_at  | <i>hlpA</i> | <i>spy1489</i> | DNA metabolism          | Packaging & segregation        | DNA packaging                        | -                                     | -                                         | 534.34                                | -378.95                               | -873.10                               | -112.21                            | 1.35E-11                    | <b>7.91E-06</b>             | 0.388454                      | 0.08073                       |
| SpM1_ChORF1857_s_at  | -           | <i>spy1857</i> | RNA metabolism          | Transcription regulation       |                                      | -                                     | -                                         | 529.92                                | 192.97                                | 112.53                                | -119.27                            | 7.41E-20                    | <b>7.91E-06</b>             | 3.31E-06                      | <b>0.000225</b>               |
| SpM1_ChORF1876_s_at  | -           | <i>spy1876</i> | Unknown                 | Conserved protein              | Unknown                              | -                                     | -                                         | 527.85                                | 352.97                                | 586.41                                | -249.56                            | 5.73E-18                    | <b>7.91E-06</b>             | 1.20E-08                      | <b>0.000225</b>               |
| SpM1_ChORF1698_s_at  | -           | <i>spy1698</i> | Unknown                 | Hypothetical protein           | Unknown                              | -                                     | -                                         | 520.91                                | -205.55                               | -419.10                               | 16.92                              | 1.08E-23                    | <b>7.91E-06</b>             | 0.7682174                     | 0.146234                      |
| SpM1_ChORF1150_s_at  | <i>nox</i>  | <i>spy1150</i> | Stress adaptation       | Oxidative stress               | Oxidative stress                     | Essential                             | -                                         | 520.25                                | 315.11                                | 212.23                                | -119.17                            | 2.05E-09                    | <b>7.91E-06</b>             | 0.0016801                     | <b>0.000574</b>               |
| SpM1_ChORF0808_s_at  | -           | <i>spy0808</i> | Unknown                 | Hypothetical protein           | Unknown                              | -                                     | -                                         | 517.25                                | -55.01                                | -151.56                               | 125.36                             | 3.69E-17                    | <b>7.91E-06</b>             | 0.0030966                     | 0.000972                      |
| SpM1_ChORF0277_s_at  | -           | <i>spy0277</i> | Membrane transport      | Membrane transport             | Amino acid membrane transport        | -                                     | -                                         | 517.02                                | 126.65                                | 5.06                                  | -177.80                            | 3.04E-21                    | <b>7.91E-06</b>             | 1.49E-10                      | <b>0.000225</b>               |
| SpM1_ChORF1506_s_at  | -           | <i>spy1506</i> | Membrane transport      | Membrane transport             | Amino acid membrane transport        | -                                     | -                                         | 515.95                                | 388.75                                | 330.66                                | -138.53                            | 6.89E-18                    | <b>7.91E-06</b>             | 3.82E-05                      | <b>0.000225</b>               |
| SpM1_ChORF1355_s_at  | -           | <i>spy1355</i> | Unknown                 | Hypothetical cytosolic Protein | Unknown                              | -                                     | -                                         | 511.96                                | 235.52                                | -60.00                                | 2269.90                            | 7.50E-09                    | <b>7.91E-06</b>             | 1.80E-47                      | <b>0.000225</b>               |
| SpM1_ChORF0006_s_at  | -           | <i>spy0006</i> | Other                   | GTP-binding protein            | GTP-binding                          | -                                     | -                                         | 511.20                                | 301.98                                | 69.31                                 | -9.47                              | 6.16E-20                    | <b>7.91E-06</b>             | 0.4470125                     | 0.091623                      |
| SpM1_ChORF2178_s_at  | <i>rpsD</i> | <i>spy2178</i> | Protein synthesis       | Ribosomal proteins             | Ribosomal protein                    | -                                     | -                                         | 497.48                                | -232.01                               | -113.51                               | 7.35                               | 4.78E-22                    | <b>7.91E-06</b>             | 0.3207103                     | 0.067651                      |
| SpM1_ChORF0109_s_at  | <i>ackA</i> | <i>spy0109</i> | Carbohydrate metabolism | Carbohydrate assimilation      | Carbohydrate assimilation            | -                                     | -                                         | 493.18                                | 62.86                                 | -68.57                                | -175.65                            | 3.02E-24                    | <b>7.91E-06</b>             | 5.89E-12                      | <b>0.000225</b>               |
| SpM1_ChORF1340_s_at  | -           | <i>spy1340</i> | Membrane transport      | Membrane transport             | Unknown substrate membrane transport | Essential                             | Essential                                 | 490.19                                | -357.37                               | -612.14                               | -293.54                            | 5.83E-19                    | <b>7.91E-06</b>             | 0.0001384                     | <b>0.00023</b>                |

| Probe Set Name*          | Gene Name     | Synonym                                 | Category           | Subcategory                    | Function                        | <i>Bacillus subtilis</i> <sup>†</sup> | <i>Staphylococcus aureus</i> <sup>†</sup> | Difference Time (30 - 0) <sup>‡</sup> | Difference Time (60 - 0) <sup>‡</sup> | Difference Time (90 - 0) <sup>‡</sup> | Difference (Mut - WT) <sup>‡</sup> | P-value (Time) <sup>§</sup> | Q-value (Time) <sup>§</sup> | P-value (Strain) <sup>§</sup> | Q-value (Strain) <sup>§</sup> |
|--------------------------|---------------|-----------------------------------------|--------------------|--------------------------------|---------------------------------|---------------------------------------|-------------------------------------------|---------------------------------------|---------------------------------------|---------------------------------------|------------------------------------|-----------------------------|-----------------------------|-------------------------------|-------------------------------|
| SpM1_ChORF0247_s_at      | -             | <i>spy0247</i>                          | Unknown            | Hypothetical protein           | Unknown                         | -                                     | -                                         | 488.67                                | 383.90                                | 126.89                                | 37.75                              | 8.50E-09                    | <b>7.91E-06</b>             | 0.5451766                     | 0.109106                      |
| SpM1_ChORF0117_s_at      | -             | <i>spy0117</i>                          | Unknown            | Hypothetical cytosolic protein | Unknown                         | -                                     | -                                         | 485.46                                | -9.31                                 | -111.88                               | -136.18                            | 1.47E-24                    | <b>7.91E-06</b>             | 2.44E-08                      | <b>0.000225</b>               |
| SpM1_ChORF1249_s_at      | -             | <i>spy1249</i>                          | Unknown            | Hypothetical Cytosolic Protein | Unknown                         | -                                     | -                                         | 484.97                                | 692.41                                | 319.05                                | 273.39                             | 2.95E-19                    | <b>7.91E-06</b>             | 3.78E-10                      | <b>0.000225</b>               |
| SpM12_ChORF299-14_at     | -             | <i>SpyoM12_ChORF_299_14</i>             | Unknown            | Hypothetical protein           | Unknown                         | Essential                             | Essential                                 | 484.09                                | 1136.50                               | 757.99                                | 111.73                             | 2.52E-32                    | <b>7.91E-06</b>             | 0.006782                      | 0.002005                      |
| SpM18_ChORF0393_s_at     | <i>speA</i>   | <i>spyM18_0393</i>                      | Virulence          | Virulence interacting proteins | Pyrogenic Toxin Superantigen    | -                                     | -                                         | 482.86                                | 1319.38                               | 2138.64                               | 451.60                             | 1.63E-35                    | <b>7.91E-06</b>             | 1.29E-10                      | <b>0.000225</b>               |
| SpM5_ChORF4P31a-118_s_at | -             | <i>SpyoM5_ChORF_4P31a0.1.w2c2309_11</i> | Unknown            | Hypothetical protein           | Unknown                         | -                                     | -                                         | 480.60                                | -861.24                               | -1911.62                              | 21.37                              | 6.33E-14                    | <b>7.91E-06</b>             | 0.5992503                     | 0.118444                      |
| SpM49_ChORF8094-24_s_at  | -             | <i>spy0037</i>                          | Unknown            | Hypothetical protein           | Unknown                         | -                                     | -                                         | 479.96                                | 180.13                                | 78.07                                 | -82.86                             | 1.43E-17                    | <b>7.91E-06</b>             | 0.0003506                     | <b>0.000261</b>               |
| SpM1_ChORF0502_s_at      | <i>secG</i>   | <i>spy0502</i>                          | Protein synthesis  | Protein translocation          | Protein secretion               | -                                     | -                                         | 478.83                                | -132.33                               | -219.96                               | 221.49                             | 1.14E-10                    | <b>7.91E-06</b>             | 0.0001504                     | <b>0.00023</b>                |
| SpM1_ChORF0246_s_at      | <i>fasX</i>   | <i>spy0246</i>                          | RNA metabolism     | Transcription regulation       | RNA modification                | -                                     | -                                         | 478.76                                | 227.87                                | 24.85                                 | -54.62                             | 9.97E-15                    | <b>7.91E-06</b>             | 0.1095331                     | 0.025391                      |
| SpM1_ChORF1733_s_at      | <i>lytR</i>   | <i>spy1733</i>                          | RNA metabolism     | Transcription regulation       | Unknown                         | -                                     | -                                         | 478.22                                | 388.49                                | 684.72                                | -356.85                            | 5.14E-25                    | <b>7.91E-06</b>             | 3.37E-18                      | <b>0.000225</b>               |
| SpM1_ChORF1841_s_at      | -             | <i>spy1841</i>                          | Unknown            | Hypothetical protein           | Unknown                         | -                                     | -                                         | 477.53                                | 72.99                                 | -129.11                               | 60.10                              | 5.42E-16                    | <b>7.91E-06</b>             | 0.252999                      | 0.054513                      |
| SpM1_ChORF1854_s_at      | <i>glpF.2</i> | <i>spy1854</i>                          | Membrane transport | Membrane transport             | Membrane ion channel            | -                                     | -                                         | 469.89                                | 22.82                                 | -70.83                                | -133.71                            | 2.17E-21                    | <b>7.91E-06</b>             | 1.96E-07                      | <b>0.000225</b>               |
| SpM1_ChORF1885_s_at      | -             | <i>spy1885</i>                          | Unknown            | Hypothetical cytosolic Protein | Unknown                         | -                                     | -                                         | 465.29                                | 479.96                                | 278.11                                | -301.01                            | 4.94E-09                    | <b>7.91E-06</b>             | 4.19E-07                      | <b>0.000225</b>               |
| SpM1_ChORF1932_s_at      | <i>rpm</i>    | <i>spy1932</i>                          | Protein synthesis  | Ribosomal proteins             | Ribosomal protein               | -                                     | -                                         | 464.79                                | -13.49                                | 19.56                                 | -47.96                             | 6.53E-23                    | <b>7.91E-06</b>             | 0.0726277                     | 0.01747                       |
| SpM1_ChORF0323_s_at      | <i>braB</i>   | <i>spy0323</i>                          | Membrane transport | Membrane transport             | Amino acid membrane transport   | -                                     | -                                         | 464.57                                | 271.63                                | 341.62                                | 304.05                             | 1.34E-21                    | <b>7.91E-06</b>             | 1.38E-18                      | <b>0.000225</b>               |
| SpM1_ChORF1094_s_at      | -             | <i>spy1094</i>                          | Unknown            | Hypothetical protein           | Unknown                         | Essential                             | -                                         | 463.82                                | 244.75                                | 6.18                                  | -92.20                             | 1.39E-19                    | <b>7.91E-06</b>             | 2.93E-05                      | <b>0.000225</b>               |
| SpM1_ChORF1226_s_at      | -             | <i>spy1226</i>                          | Membrane transport | Membrane transport             | Carbohydrate membrane transport | -                                     | -                                         | 462.31                                | 526.50                                | 495.81                                | -492.85                            | 5.14E-18                    | <b>7.91E-06</b>             | 1.76E-21                      | <b>0.000225</b>               |
| SpM1_ChORF1742_s_at      | <i>serS</i>   | <i>spy1742</i>                          | Protein synthesis  | tRNA synthetases               | tRNA synthetase                 | -                                     | -                                         | 448.79                                | 239.00                                | 132.01                                | -628.00                            | 1.76E-05                    | <b>7.91E-06</b>             | 8.07E-15                      | <b>0.000225</b>               |
| SpM1_ChORF1497_s_at      | <i>hlyA1</i>  | <i>spy1497</i>                          | Virulence          | Virulence interacting proteins | Exotoxin                        | -                                     | -                                         | 447.17                                | 643.09                                | 337.56                                | 88.91                              | 1.32E-18                    | <b>7.91E-06</b>             | 0.0257249                     | 0.006859                      |
| SpM1_ChORF0337_s_at      | <i>covS</i>   | <i>spy0337</i>                          | RNA metabolism     | Transcription regulation       | Signal transduction             | -                                     | -                                         | 446.76                                | -7.68                                 | -182.55                               | 1513.48                            | 3.41E-09                    | <b>7.91E-06</b>             | 4.39E-35                      | <b>0.000225</b>               |
| SpM1_ChORF1886_s_at      | <i>asp</i>    | <i>spy1886</i>                          | Stress adaptation  | Cold shock proteins            | Cold shock proteins             | -                                     | -                                         | 446.72                                | 441.34                                | 157.75                                | -70.73                             | 1.72E-12                    | <b>7.91E-06</b>             | 0.057691                      | 0.014218                      |
| SpM1_ChORF0611_s_at      | <i>tufA</i>   | <i>spy0611</i>                          | Protein synthesis  | Translation factors            | Translation factor              | -                                     | Essential                                 | 444.68                                | -235.14                               | -404.76                               | -1206.68                           | 0.0097404                   | <b>0.000126</b>             | 2.39E-09                      | <b>0.000225</b>               |
| SpM1_ChORF0907_s_at      | <i>pyrC</i>   | <i>spy0907</i>                          | Nucleotides        | Nucleotides biosynthesis       | Pyrimidine biosynthesis         | -                                     | -                                         | 442.50                                | 150.90                                | -96.48                                | -258.42                            | 5.33E-18                    | <b>7.91E-06</b>             | 1.75E-12                      | <b>0.000225</b>               |

| Probe Set Name*      | Gene Name    | Synonym            | Category                | Subcategory                    | Function                   | <i>Bacillus subtilis</i> † | <i>Staphylococcus aureus</i> † | Difference Time (30 - 0)‡ | Difference Time (60 - 0)‡ | Difference Time (90 - 0)‡ | Difference (Mut - WT)‡ | P-value (Time)§ | Q-value (Time)§ | P-value (Strain)§ | Q-value (Strain)§ |
|----------------------|--------------|--------------------|-------------------------|--------------------------------|----------------------------|----------------------------|--------------------------------|---------------------------|---------------------------|---------------------------|------------------------|-----------------|-----------------|-------------------|-------------------|
| SpM1_ChORF1368_s_at  | <i>udk</i>   | <i>spy1368</i>     | Nucleotides             | Nucleotides metabolism         | Pyrimidine salvage         | -                          | -                              | 440.37                    | 47.19                     | 6.53                      | -13.78                 | 5.58E-26        | <b>7.91E-06</b> | 0.3895015         | 0.080852          |
| SpM1_ChORF0822_s_at  | <i>rpmA</i>  | <i>spy0822</i>     | Protein synthesis       | Ribosomal proteins             | Ribosomal protein          | -                          | -                              | 439.59                    | -502.49                   | -493.68                   | -28.92                 | 3.25E-10        | <b>7.91E-06</b> | 0.8137839         | 0.153922          |
| SpM1_ChORF0123_s_at  | <i>hsp33</i> | <i>spy0123</i>     | Stress adaptation       | Heat shock proteins            | Heat shock proteins        | -                          | -                              | 439.55                    | 49.80                     | 2.21                      | -171.84                | 4.16E-14        | <b>7.91E-06</b> | 3.52E-06          | <b>0.000225</b>   |
| SpM1_ChORF0066_s_at  | <i>rplF</i>  | <i>spy0066</i>     | Protein synthesis       | Ribosomal proteins             | Ribosomal protein          | -                          | -                              | 436.14                    | -136.22                   | -665.54                   | -276.75                | 4.51E-07        | <b>7.91E-06</b> | 0.0606481         | 0.014884          |
| SpM1_ChORF0461_s_at  | <i>rplA</i>  | <i>spy0461</i>     | Protein synthesis       | Ribosomal proteins             | Ribosomal protein          | -                          | -                              | 432.35                    | -63.12                    | 94.04                     | -27.89                 | 8.85E-17        | <b>7.91E-06</b> | 0.8914011         | 0.165136          |
| SpM1_ChORF1498_s_at  | <i>fps</i>   | <i>spy1498</i>     | Lipid metabolism        | Isoprenoids                    | Isoprenoid biosynthesis    | -                          | -                              | 431.94                    | 455.85                    | 160.89                    | 25.18                  | 1.43E-24        | <b>7.91E-06</b> | 0.5420334         | 0.108601          |
| SpM18_ChORF0279_s_at | -            | <i>spyM18_0279</i> | Cell envelope           | Cell wall                      | Peptidoglycan biosynthesis | -                          | -                              | 428.12                    | 58.35                     | 72.15                     | -234.27                | 1.92E-17        | <b>7.91E-06</b> | 2.63E-14          | <b>0.000225</b>   |
| SpM1_ChORF0282_s_at  | <i>rgpG</i>  | <i>spy0282</i>     | Cell envelope           | Cell wall                      | Peptidoglycan biosynthesis | -                          | -                              | 425.82                    | 216.93                    | -39.17                    | -152.26                | 1.73E-22        | <b>7.91E-06</b> | 1.71E-09          | <b>0.000225</b>   |
| SpM1_ChORF0915_s_at  | -            | <i>spy0915</i>     | Unknown                 | Hypothetical protein           | Unknown                    | -                          | -                              | 425.62                    | 160.94                    | 270.12                    | -169.42                | 8.03E-22        | <b>7.91E-06</b> | 5.83E-13          | <b>0.000225</b>   |
| SpM1_ChORF0250_x_at  | <i>rpmH</i>  | <i>spy0250</i>     | Protein synthesis       | Ribosomal proteins             | Ribosomal protein          | -                          | -                              | 425.50                    | 424.04                    | 208.81                    | -8.64                  | 1.40E-12        | <b>7.91E-06</b> | 0.689495          | 0.133503          |
| SpM1_ChORF1204_s_at  | <i>guaA</i>  | <i>spy1204</i>     | Nucleotides             | Nucleotides biosynthesis       | Purine biosynthesis        | -                          | -                              | 424.04                    | -42.54                    | -249.18                   | -139.43                | 6.80E-18        | <b>7.91E-06</b> | 3.76E-05          | <b>0.000225</b>   |
| SpM1_ChORF1858_s_at  | <i>pepXP</i> | <i>spy1858</i>     | Amino acid metabolism   | Amino acid catabolism          | Amino acid catabolism      | -                          | -                              | 423.75                    | 314.26                    | 231.04                    | -203.21                | 9.35E-26        | <b>7.91E-06</b> | 1.75E-17          | <b>0.000225</b>   |
| SpM1_ChORF1230_s_at  | <i>cdd</i>   | <i>spy1230</i>     | Nucleotides             | Nucleotides metabolism         | Pyrimidine salvage         | -                          | -                              | 423.60                    | 377.65                    | 364.74                    | -92.07                 | 3.15E-21        | <b>7.91E-06</b> | 0.0001721         | <b>0.000233</b>   |
| SpM1_ChORF1496_s_at  | -            | <i>spy1496</i>     | RNA metabolism          | Transcription regulation       | Unknown                    | -                          | -                              | 422.21                    | 423.47                    | 179.20                    | -14.46                 | 1.40E-14        | <b>7.91E-06</b> | 0.7709569         | 0.146531          |
| SpM18_ChORF0838_x_at | <i>rplU</i>  | <i>spyM18_0838</i> | Protein synthesis       | Ribosomal proteins             | Ribosomal protein          | -                          | -                              | 421.80                    | -42.11                    | -64.03                    | -63.39                 | 7.42E-11        | <b>7.91E-06</b> | 0.2153131         | 0.047322          |
| SpM1_ChORF1874_s_at  | -            | <i>spy1874</i>     | Amino acid metabolism   | Amino acid catabolism          | Amino acid catabolism      | -                          | -                              | 420.78                    | -111.72                   | -243.29                   | -91.59                 | 2.39E-23        | <b>7.91E-06</b> | 0.0005169         | <b>0.000292</b>   |
| SpM1_ChORF1884_s_at  | -            | <i>spy1884</i>     | Unknown                 | Hypothetical membrane protein  | Unknown                    | -                          | -                              | 420.05                    | 1259.61                   | 1517.82                   | -156.99                | 1.38E-20        | <b>7.91E-06</b> | 0.0201724         | 0.005508          |
| SpM1_ChORF0271_s_at  | <i>rpsL</i>  | <i>spy0271</i>     | Protein synthesis       | Ribosomal proteins             | Ribosomal protein          | -                          | -                              | 416.74                    | -149.89                   | 119.75                    | -44.90                 | 3.97E-08        | <b>7.91E-06</b> | 0.8807287         | 0.163591          |
| SpM1_ChORF2114_s_at  | -            | <i>spy2114</i>     | Unknown                 | Hypothetical cytosolic Protein | Unknown                    | -                          | -                              | 413.26                    | 873.32                    | -524.68                   | -472.11                | 2.35E-05        | <b>7.91E-06</b> | 0.0091776         | 0.002646          |
| SpM1_ChORF1881_s_at  | <i>pgk</i>   | <i>spy1881</i>     | Carbohydrate metabolism | Bioenergetics                  | Glycolysis                 | -                          | -                              | 410.95                    | 311.43                    | -350.66                   | -118.05                | 5.46E-13        | <b>7.91E-06</b> | 0.0666874         | 0.016185          |
| SpM1_ChORF0049_s_at  | <i>rplC</i>  | <i>spy0049</i>     | Protein synthesis       | Ribosomal proteins             | Ribosomal protein          | -                          | -                              | 408.95                    | -408.63                   | -310.17                   | -158.66                | 2.57E-19        | <b>7.91E-06</b> | 0.0026028         | 0.000832          |
| SpM1_ChORF0613_s_at  | <i>tpi</i>   | <i>spy0613</i>     | Carbohydrate metabolism | Bioenergetics                  | Glycolysis                 | -                          | Essential                      | 407.43                    | 656.09                    | 111.25                    | 88.86                  | 2.46E-12        | <b>7.91E-06</b> | 0.1411974         | 0.031931          |
| SpM1_ChORF1242_s_at  | <i>pstB2</i> | <i>spy1242</i>     | Membrane transport      | Membrane transport             | Ion membrane transport     | -                          | -                              | 407.04                    | -140.57                   | -691.72                   | 747.79                 | 4.33E-14        | <b>7.91E-06</b> | 2.72E-14          | <b>0.000225</b>   |
| SpM1_ChORF0074_s_at  | <i>adk</i>   | <i>spy0074</i>     | Nucleotides             | Nucleotides biosynthesis       | Purine biosynthesis        | -                          | -                              | 403.20                    | 90.62                     | -384.64                   | 83.44                  | 2.80E-22        | <b>7.91E-06</b> | 0.0338333         | 0.008749          |
| SpM1_ChORF1666_s_at  | <i>ftsL</i>  | <i>spy1665</i>     | Cell shape and division | Cell shape & division          | Cell division              | -                          | -                              | 402.41                    | -64.90                    | -24.02                    | -32.08                 | 8.03E-15        | <b>7.91E-06</b> | 0.203988          | 0.044917          |
| SpM1_ChORF2159_s_at  | <i>rpmF</i>  | <i>spy2159</i>     | Protein synthesis       | Ribosomal proteins             | Ribosomal protein          | -                          | -                              | 402.00                    | -531.43                   | -394.73                   | -162.21                | 2.03E-16        | <b>7.91E-06</b> | 0.0191564         | 0.005251          |
| SpM1_ChORF0650_s_at  | <i>aspC</i>  | <i>spy0650</i>     | Amino acid metabolism   | Amino acid biosynthesis        | Amino acid biosynthesis    | -                          | -                              | 401.25                    | 149.50                    | 119.20                    | -220.47                | 1.29E-25        | <b>7.91E-06</b> | 2.75E-21          | <b>0.000225</b>   |



| Probe Set Name*        | Gene Name            | Synonym        | Category                | Subcategory                     | Function                        | <i>Bacillus subtilis</i> <sup>†</sup> | <i>Staphylococcus aureus</i> <sup>†</sup> | Difference Time (30 - 0) <sup>‡</sup> | Difference Time (60 - 0) <sup>‡</sup> | Difference Time (90 - 0) <sup>‡</sup> | Difference (Mut - WT) <sup>‡</sup> | P-value (Time) <sup>§</sup> | Q-value (Time) <sup>§</sup> | P-value (Strain) <sup>§</sup> | Q-value (Strain) <sup>§</sup> |
|------------------------|----------------------|----------------|-------------------------|---------------------------------|---------------------------------|---------------------------------------|-------------------------------------------|---------------------------------------|---------------------------------------|---------------------------------------|------------------------------------|-----------------------------|-----------------------------|-------------------------------|-------------------------------|
| SpM1_ChORF1222_s_at    | <i>dfp</i>           | <i>spy1222</i> | Cofactors               |                                 |                                 | -                                     | -                                         | 400.79                                | 383.86                                | 312.53                                | -62.77                             | 5.67E-25                    | <b>7.91E-06</b>             | 0.0005774                     | <b>0.000303</b>               |
| SpM1_ChORF0099_s_at    | <i>rpoC</i>          | <i>spy0099</i> | RNA metabolism          | Basic transcription machinery   | Basic transcription machinery   | -                                     | -                                         | 397.25                                | -629.70                               | -929.85                               | -1041.29                           | 6.42E-10                    | <b>7.91E-06</b>             | 5.70E-11                      | <b>0.000225</b>               |
| SpM1_ChORF0763_s_at    | <i>murA, murAA ?</i> | <i>spy0763</i> | Cell envelope           | Cell wall                       | Peptidoglycan biosynthesis      | -                                     | -                                         | 396.33                                | -35.14                                | -148.19                               | -15.56                             | 2.04E-12                    | <b>7.91E-06</b>             | 0.4276605                     | 0.087839                      |
| SpM1_ChORF0861_s_at    | <i>mac</i>           | <i>spy0861</i> | Virulence               | Virulence interacting proteins  | Extracellular protein           | -                                     | -                                         | 392.06                                | 175.88                                | 58.25                                 | 322.36                             | 2.39E-15                    | <b>7.91E-06</b>             | 7.83E-18                      | <b>0.000225</b>               |
| SpM1_ChORF2019_s_at    | <i>mga</i>           | <i>spy2019</i> | RNA metabolism          | Transcription r egulation       |                                 | -                                     | -                                         | 390.81                                | 233.65                                | 73.96                                 | 48.30                              | 4.70E-19                    | <b>7.91E-06</b>             | 0.0973138                     | 0.022875                      |
| SpM1_ChORF1895_s_at    | <i>rpoE</i>          | <i>spy1895</i> | RNA metabolism          | Basic transcription machinery   | Basic transcription machinery   | -                                     | -                                         | 387.22                                | -72.04                                | -152.10                               | -108.80                            | 1.46E-19                    | <b>7.91E-06</b>             | 5.03E-05                      | <b>0.000225</b>               |
| SpM1_ChORF1201_s_at    | <i>yIxB</i>          | <i>spy1201</i> | Unknown                 | Hypothetical cytosolic protein  | Unknown                         | -                                     | -                                         | 384.14                                | 14.12                                 | 83.82                                 | -116.98                            | 4.39E-18                    | <b>7.91E-06</b>             | 2.49E-07                      | <b>0.000225</b>               |
| SpM1_ChORF0359_s_at    | -                    | <i>spy0359</i> | Unknown                 | Hypothetical protein            | Unknown                         | -                                     | -                                         | 383.62                                | 8.90                                  | -117.25                               | 61.36                              | 1.22E-11                    | <b>7.91E-06</b>             | 0.0805051                     | 0.019193                      |
| SpM18_ChORF0328_s_at   | <i>covR</i>          | <i>spy0336</i> | RNA metabolism          | Transcription r egulation       | Signal transduction             | -                                     | -                                         | 383.09                                | -397.26                               | -414.97                               | 1159.27                            | 2.41E-12                    | <b>7.91E-06</b>             | 5.90E-25                      | <b>0.000225</b>               |
| SpM1_ChORF1889_s_at    | <i>fba</i>           | <i>spy1889</i> | Carbohydrate metabolism | Bioenergetics                   | Glycolysis                      | -                                     | -                                         | 382.57                                | -1017.34                              | -1211.13                              | -155.59                            | 1.70E-21                    | <b>7.91E-06</b>             | 0.0326724                     | 0.008486                      |
| SpM1_ChORF1521_s_at    | <i>ftsA</i>          | <i>spy1521</i> | Cell shape and division | Cell shape & division           | Cell division                   | -                                     | -                                         | 380.56                                | -360.26                               | -901.20                               | 77.66                              | 1.55E-14                    | <b>7.91E-06</b>             | 0.6493072                     | 0.126699                      |
| SpM1_ChORF1828_s_at    | -                    | <i>spy1828</i> | Unknown                 | Hypothetical membrane protein   | Unknown                         | -                                     | -                                         | 380.42                                | 26.12                                 | -39.38                                | -139.81                            | 1.32E-22                    | <b>7.91E-06</b>             | 9.73E-11                      | <b>0.000225</b>               |
| SpM1_ChORF0749_s_at    | -                    | <i>spy0749</i> | Unknown                 | Hypothetical Cytosolic Protein  | Unknown                         | -                                     | -                                         | 377.45                                | 508.06                                | 744.52                                | -31.28                             | 2.53E-30                    | <b>7.91E-06</b>             | 0.0624741                     | 0.0153                        |
| SpM1_ChORF0292_s_at    | <i>dacA</i>          | <i>spy0292</i> | Cell envelope           | Cell wall                       | Peptidoglycan biosynthesis      | -                                     | -                                         | 377.17                                | 352.65                                | 140.51                                | 98.09                              | 1.19E-20                    | <b>7.91E-06</b>             | 0.0002137                     | <b>0.000239</b>               |
| SpM1_ChORF0281_s_at    | <i>mecA</i>          | <i>spy0281</i> | Virulence               | Virulence interacting proteins  | Lantibiotic, Quorum sensing     | -                                     | -                                         | 375.02                                | 86.47                                 | -3.19                                 | -83.53                             | 2.03E-19                    | <b>7.91E-06</b>             | 1.95E-05                      | <b>0.000225</b>               |
| SpM1_ChORF1232_s_at    | -                    | <i>spy1232</i> | Unknown                 | Hypothetical protein            | Unknown                         | -                                     | -                                         | 374.20                                | 75.65                                 | -31.23                                | -81.76                             | 3.58E-21                    | <b>7.91E-06</b>             | 2.74E-06                      | <b>0.000225</b>               |
| SpM12_ChORF266-14_s_at | -                    | <i>spy0580</i> | Unknown                 | Hypothetical protein            | Unknown                         | -                                     | -                                         | 370.99                                | 77.86                                 | 32.53                                 | -105.36                            | 1.47E-20                    | <b>7.91E-06</b>             | 1.12E-07                      | <b>0.000225</b>               |
| SpM1_ChORF1571_s_at    | -                    | <i>spy1571</i> | Stress adaptation       | Heat shock proteins             | Heat shock proteins             | -                                     | -                                         | 370.93                                | 95.99                                 | 24.40                                 | -49.49                             | 3.33E-22                    | <b>7.91E-06</b>             | 0.0008115                     | <b>0.000352</b>               |
| SpM1_ChORF1735_s_at    | -                    | <i>spy1735</i> | Unknown                 | Conserved protein               | Unknown                         | -                                     | -                                         | 368.85                                | 202.33                                | 314.60                                | -194.06                            | 2.41E-21                    | <b>7.91E-06</b>             | 1.73E-14                      | <b>0.000225</b>               |
| SpM1_ChORF1225_s_at    | -                    | <i>spy1225</i> | Membrane transport      | Membrane transport              | Carbohydrate membrane transport | -                                     | -                                         | 365.91                                | 456.25                                | 429.30                                | -466.76                            | 2.21E-11                    | <b>7.91E-06</b>             | 4.26E-16                      | <b>0.000225</b>               |
| SpM1_ChORF1224_s_at    | <i>pgmA</i>          | <i>spy1224</i> | Carbohydrate metabolism | Carbohydrate central metabolism | Carbohydrate central metabolism | -                                     | -                                         | 365.88                                | 621.70                                | -8.39                                 | -362.57                            | 1.71E-09                    | <b>7.91E-06</b>             | 3.04E-07                      | <b>0.000225</b>               |
| SpM1_ChORF1214_s_at    | <i>lplA</i>          | <i>spy1214</i> | Cofactors               |                                 |                                 | -                                     | -                                         | 361.86                                | 1137.98                               | 1111.21                               | -20.02                             | 2.39E-24                    | <b>7.91E-06</b>             | 0.7547882                     | 0.144003                      |
| SpM1_ChORF1038_s_at    | <i>femD</i>          | <i>spy1038</i> | Cell envelope           | Cell wall                       | Aminosugar metabolism           | -                                     | -                                         | 361.84                                | 132.71                                | -30.88                                | -65.88                             | 1.12E-15                    | <b>7.91E-06</b>             | 0.0219539                     | 0.005949                      |
| SpM1_ChORF0809_s_at    | <i>aroD</i>          | <i>spy0809</i> | Carbohydrate metabolism | Bioenergetics                   |                                 | -                                     | -                                         | 361.47                                | -225.04                               | -493.71                               | 138.10                             | 3.32E-17                    | <b>7.91E-06</b>             | 0.015459                      | 0.004295                      |

| Probe Set Name*      | Gene Name    | Synonym            | Category           | Subcategory                            | Function                               | <i>Bacillus subtilis</i> † | <i>Staphylococcus aureus</i> † | Difference Time (30 - 0)‡ | Difference Time (60 - 0)‡ | Difference Time (90 - 0)‡ | Difference (Mut - WT)‡ | P-value (Time)§ | Q-value (Time)§ | P-value (Strain)§ | Q-value (Strain)§ |
|----------------------|--------------|--------------------|--------------------|----------------------------------------|----------------------------------------|----------------------------|--------------------------------|---------------------------|---------------------------|---------------------------|------------------------|-----------------|-----------------|-------------------|-------------------|
| SpM1_ChORF0617_s_at  | -            | <i>spy0617</i>     | Unknown            | Hypothetical protein                   | Unknown                                | Essential                  | -                              | 360.53                    | 29.26                     | -248.60                   | -37.88                 | 2.11E-20        | <b>7.91E-06</b> | 0.0571014         | 0.014092          |
| SpM1_ChORF1215_s_at  | -            | <i>spy1215</i>     | Unknown            | Hypothetical Cytosolic Protein         | Unknown                                | -                          | -                              | 359.25                    | 1371.42                   | 1203.58                   | -14.79                 | 8.82E-20        | <b>7.91E-06</b> | 0.9664378         | 0.177077          |
| SpM1_ChORF2148_s_at  | <i>mutS</i>  | <i>spy2148</i>     | DNA metabolism     | DNA replication, modification & repair | DNA replication, modification & repair | -                          | -                              | 358.63                    | 335.61                    | 359.13                    | -79.16                 | 4.92E-20        | <b>7.91E-06</b> | 0.0008173         | <b>0.000352</b>   |
| SpM1_ChORF0269_s_at  | <i>prgA</i>  | <i>spy0269</i>     | Virulence          | Virulence interacting proteins         | Cell surface protein                   | -                          | -                              | 355.10                    | 1186.43                   | 373.14                    | 264.76                 | 2.28E-08        | <b>7.91E-06</b> | 0.0338299         | 0.008749          |
| SpM18_ChORF1621_s_at | -            | <i>spyM18_1621</i> | Unknown            | Hypothetical protein                   | Unknown                                | -                          | -                              | 355.01                    | -151.65                   | 345.08                    | -536.60                | 0.0193377       | <b>0.000246</b> | 0.0014009         | <b>0.000498</b>   |
| SpM1_ChORF1425_s_at  | -            | <i>spy1425</i>     | Unknown            | Hypothetical protein                   | Unknown                                | -                          | -                              | 351.15                    | 540.11                    | 533.67                    | 70.87                  | 6.05E-15        | <b>7.91E-06</b> | 0.0628392         | 0.015368          |
| SpM1_ChORF2191_s_at  | <i>sceD</i>  | <i>spy2191</i>     | Virulence          | Virulence interacting proteins         | Extracellular protein                  | -                          | -                              | 349.71                    | 107.02                    | 243.97                    | 122.35                 | 8.85E-23        | <b>7.91E-06</b> | 1.44E-10          | <b>0.000225</b>   |
| SpM1_ChORF1223_s_at  | -            | <i>spy1223</i>     | Unknown            | Hypothetical membrane protein          | Unknown                                | Essential                  | -                              | 348.20                    | 360.11                    | 299.61                    | -90.15                 | 2.47E-11        | <b>7.91E-06</b> | 0.0198884         | 0.005435          |
| SpM1_ChORF1827_s_at  | -            | <i>spy1827</i>     | Membrane transport | Membrane transport                     | Metal ion membrane transport           | -                          | -                              | 344.65                    | -31.02                    | -93.01                    | -61.53                 | 1.55E-22        | <b>7.91E-06</b> | 0.0005975         | <b>0.000307</b>   |
| SpM1_ChORF0887_s_at  | -            | <i>spy0887</i>     | Unknown            | Hypothetical protein                   | Unknown                                | Essential                  | -                              | 344.54                    | 13.51                     | 47.82                     | -152.75                | 4.86E-17        | <b>7.91E-06</b> | 3.82E-09          | <b>0.000225</b>   |
| SpM1_ChORF1245_s_at  | <i>pstS</i>  | <i>spy1245</i>     | Membrane transport | Membrane transport                     | Ion membrane transport                 | -                          | -                              | 339.36                    | -16.00                    | -177.35                   | 347.64                 | 2.51E-24        | <b>7.91E-06</b> | 2.36E-24          | <b>0.000225</b>   |
| SpM1_ChORF0092_s_at  | <i>adcR</i>  | <i>spy0092</i>     | RNA metabolism     | Transcription regulation               | Unknown                                | Essential                  | -                              | 338.14                    | 105.00                    | 150.00                    | -119.22                | 2.19E-16        | <b>7.91E-06</b> | 1.81E-07          | <b>0.000225</b>   |
| SpM1_ChORF1862_s_at  | -            | <i>spy1862</i>     | Unknown            | Hypothetical cytosolic Protein         | Unknown                                | -                          | -                              | 332.60                    | 587.83                    | 284.78                    | -189.09                | 2.01E-17        | <b>7.91E-06</b> | 1.83E-07          | <b>0.000225</b>   |
| SpM1_ChORF1837_s_at  | <i>mutS2</i> | <i>spy1837</i>     | DNA metabolism     | DNA replication, modification & repair | DNA replication, modification & repair | -                          | -                              | 331.95                    | 67.77                     | 20.12                     | -121.51                | 5.61E-14        | <b>7.91E-06</b> | 3.08E-05          | <b>0.000225</b>   |
| SpM1_ChORF2010_s_at  | <i>scpA</i>  | <i>spy2010</i>     | Virulence          | Virulence interacting proteins         | Extracellular protein                  | -                          | -                              | 331.73                    | -392.77                   | -1233.07                  | -1009.24               | 3.53E-08        | <b>7.91E-06</b> | 4.54E-07          | <b>0.000225</b>   |
| SpM1_ChORF0596_s_at  | -            | <i>spy0596</i>     | Unknown            | Hypothetical protein                   | Unknown                                | Essential                  | -                              | 329.63                    | 49.04                     | -74.38                    | -27.86                 | 1.49E-20        | <b>7.91E-06</b> | 0.1188613         | 0.027409          |
| SpM1_ChORF0501_s_at  | -            | <i>spy0501</i>     | Membrane transport | Membrane transport                     | Unknown substrate membrane transport   | -                          | -                              | 329.18                    | -358.07                   | -312.47                   | 94.40                  | 3.82E-13        | <b>7.91E-06</b> | 0.0235147         | 0.006332          |
| SpM1_ChORF1033_s_at  | <i>lpIB</i>  | <i>spy1033</i>     | Cofactors          | Unknown                                | Unknown                                | -                          | -                              | 325.82                    | 41.29                     | -34.32                    | -58.90                 | 3.04E-20        | <b>7.91E-06</b> | 0.0001034         | <b>0.000227</b>   |
| SpM1_ChORF0467_s_at  | -            | <i>spy0467</i>     | Unknown            | Hypothetical Cytosolic Protein         | Unknown                                | -                          | -                              | 324.19                    | 339.93                    | 292.00                    | -210.88                | 1.72E-14        | <b>7.91E-06</b> | 1.41E-10          | <b>0.000225</b>   |
| SpM1_ChORF2149_s_at  | -            | <i>spy2149</i>     | Unknown            | Hypothetical cytosolic Protein         | Unknown                                | -                          | -                              | 320.94                    | 168.96                    | 124.30                    | 29.06                  | 3.58E-16        | <b>7.91E-06</b> | 0.2525161         | 0.054443          |
| SpM1_ChORF1139_at    | -            | <i>spy1139</i>     | Unknown            | Hypothetical protein                   | Unknown                                | -                          | -                              | 320.30                    | 45.40                     | -45.90                    | -100.24                | 3.19E-12        | <b>7.91E-06</b> | 0.0001378         | <b>0.00023</b>    |

| Probe Set Name*         | Gene Name     | Synonym                                | Category                | Subcategory                        | Function                             | <i>Bacillus subtilis</i> <sup>†</sup> | <i>Staphylococcus aureus</i> <sup>†</sup> | Difference Time (30 - 0) <sup>‡</sup> | Difference Time (60 - 0) <sup>‡</sup> | Difference Time (90 - 0) <sup>‡</sup> | Difference (Mut - WT) <sup>‡</sup> | P-value (Time) <sup>§</sup> | Q-value (Time) <sup>§</sup> | P-value (Strain) <sup>§</sup> | Q-value (Strain) <sup>§</sup> |
|-------------------------|---------------|----------------------------------------|-------------------------|------------------------------------|--------------------------------------|---------------------------------------|-------------------------------------------|---------------------------------------|---------------------------------------|---------------------------------------|------------------------------------|-----------------------------|-----------------------------|-------------------------------|-------------------------------|
| SpM1_ChORF1941_s_at     | <i>cysS</i>   | <i>spy1941</i>                         | Protein synthesis       | tRNA synthetases                   | tRNA synthetase                      | Essential                             | Essential                                 | 318.92                                | 295.49                                | 3.34                                  | -165.80                            | 1.87E-14                    | <b>7.91E-06</b>             | 9.26E-08                      | <b>0.000225</b>               |
| SpM1_ChORF1726_s_at     | -             | <i>spy1726</i>                         | Unknown                 | Hypothetical protein               | Unknown                              | -                                     | -                                         | 318.84                                | 205.72                                | -34.96                                | -67.67                             | 8.14E-15                    | <b>7.91E-06</b>             | 0.0016833                     | <b>0.000574</b>               |
| SpM1_ChORF0121_s_at     | -             | <i>spy0121</i>                         | Unknown                 | Hypothetical protein               | Unknown                              | -                                     | -                                         | 316.58                                | 23.84                                 | -44.75                                | -281.33                            | 2.60E-12                    | <b>7.91E-06</b>             | 4.82E-13                      | <b>0.000225</b>               |
| SpM5_ChORFJ7578C-5_s_at | -             | <i>SpyoM5_Chr ORF_J7578C e05.s1c_5</i> | Unknown                 | Hypothetical protein               | Unknown                              | -                                     | -                                         | 313.81                                | -104.55                               | -94.76                                | -190.48                            | 2.03E-08                    | <b>7.91E-06</b>             | 0.0001083                     | <b>0.000227</b>               |
| SpM1_ChORF1649_s_at     | <i>pbp1A</i>  | <i>spy1649</i>                         | Cell envelope           | Cell wall                          | Peptidoglycan biosynthesis           | -                                     | -                                         | 312.87                                | 766.38                                | 88.45                                 | -462.30                            | 1.10E-05                    | <b>7.91E-06</b>             | 6.81E-06                      | <b>0.000225</b>               |
| SpM1_ChORF0786_s_at     | <i>rgpAc</i>  | <i>spy0786</i>                         | Cell envelope           | Cell wall                          | Peptidoglycan biosynthesis           | -                                     | -                                         | 312.01                                | -35.95                                | -144.32                               | 79.96                              | 4.66E-19                    | <b>7.91E-06</b>             | 0.0013306                     | <b>0.00048</b>                |
| SpM1_ChORF0050_s_at     | <i>rpID</i>   | <i>spy0050</i>                         | Protein synthesis       | Ribosomal proteins                 | Ribosomal protein                    | -                                     | -                                         | 304.02                                | -267.07                               | -282.52                               | -166.62                            | 1.36E-14                    | <b>7.91E-06</b>             | 0.0035412                     | 0.001096                      |
| SpM1_ChORF0908_s_at     | -             | <i>spy0908</i>                         | Unknown                 | Conserved protein                  | Unknown                              | Essential                             | -                                         | 302.73                                | 201.33                                | 160.86                                | -90.60                             | 3.72E-22                    | <b>7.91E-06</b>             | 1.73E-08                      | <b>0.000225</b>               |
| SpM1_ChORF1892_s_at     | -             | <i>spy1892</i>                         | Unknown                 | Hypothetical extracellular protein | Unknown                              | -                                     | -                                         | 301.80                                | -93.12                                | -130.73                               | -178.14                            | 1.93E-17                    | <b>7.91E-06</b>             | 3.81E-09                      | <b>0.000225</b>               |
| SpM1_ChORF2104_s_at     | -             | <i>spy2104</i>                         | Unknown                 | Hypothetical cytosolic Protein     | Unknown                              | -                                     | -                                         | 295.22                                | 42.60                                 | 26.33                                 | -104.03                            | 3.66E-19                    | <b>7.91E-06</b>             | 8.83E-09                      | <b>0.000225</b>               |
| SpM12_ChORF299-12_at    | -             | <i>SpyoM12_Chr ORF_299_12</i>          | Unknown                 | Hypothetical protein               | Unknown                              | -                                     | -                                         | 294.70                                | 457.65                                | 347.10                                | 59.10                              | 2.84E-26                    | <b>7.91E-06</b>             | 0.0126921                     | 0.003565                      |
| SpM1_ChORF1729_s_at     | -             | <i>spy1729</i>                         | Membrane transport      | Membrane transport                 | Unknown substrate membrane transport | -                                     | -                                         | 293.84                                | 215.07                                | 12.07                                 | -18.34                             | 2.82E-16                    | <b>7.91E-06</b>             | 0.2173244                     | 0.047644                      |
| SpM1_ChORF0321_s_at     | -             | <i>spy0321</i>                         | Membrane transport      | Membrane transport                 | Unknown substrate membrane transport | Essential                             | -                                         | 293.48                                | 233.39                                | 213.44                                | -33.03                             | 7.50E-11                    | <b>7.91E-06</b>             | 0.2197412                     | 0.048003                      |
| SpM1_ChORF1071_s_at     | <i>thdF</i>   | <i>spy1071</i>                         | Other                   | GTP-binding protein                | GTP-binding                          | -                                     | -                                         | 292.09                                | 60.09                                 | 80.16                                 | -146.81                            | 9.65E-23                    | <b>7.91E-06</b>             | 4.68E-17                      | <b>0.000225</b>               |
| SpM1_ChORF0591_s_at     | -             | <i>spy0591</i>                         | Unknown                 | Hypothetical Cytosolic Protein     | Unknown                              | Essential                             | -                                         | 292.02                                | 3.53                                  | 87.42                                 | -260.77                            | 7.09E-16                    | <b>7.91E-06</b>             | 7.83E-19                      | <b>0.000225</b>               |
| SpM1_ChORF0343_s_at     | -             | <i>spy0343</i>                         | Unknown                 | Hypothetical Cytosolic Protein     | Unknown                              | -                                     | Essential                                 | 289.88                                | -77.83                                | -123.74                               | -5.79                              | 6.21E-12                    | <b>7.91E-06</b>             | 0.5726026                     | 0.113817                      |
| SpM1_ChORF1378_s_at     | <i>nrdF.2</i> | <i>spy1378</i>                         | Nucleotides             | Nucleotides biosynthesis           | Purine, pyrimidine biosynthesis      | -                                     | -                                         | 289.20                                | -52.50                                | -241.14                               | -351.21                            | 1.30E-21                    | <b>7.91E-06</b>             | 1.16E-21                      | <b>0.000225</b>               |
| SpM1_ChORF2210_s_at     | -             | <i>spy2210</i>                         | Membrane transport      | Membrane transport                 | Unknown substrate membrane transport | Essential                             | Essential                                 | 288.87                                | -35.65                                | -229.23                               | -101.40                            | 1.42E-20                    | <b>7.91E-06</b>             | 1.10E-05                      | <b>0.000225</b>               |
| SpM1_ChORF0015_s_at     | <i>ftsH</i>   | <i>spy0015</i>                         | Cell shape and division | Cell shape & division              | Cell division                        | -                                     | -                                         | 288.57                                | -442.23                               | -547.49                               | -793.69                            | 7.35E-08                    | <b>7.91E-06</b>             | 7.58E-13                      | <b>0.000225</b>               |
| SpM1_ChORF0305_s_at     | -             | <i>spy0305</i>                         | Unknown                 | Hypothetical protein               | Unknown                              | -                                     | -                                         | 287.62                                | 38.91                                 | 30.11                                 | -156.75                            | 5.39E-12                    | <b>7.91E-06</b>             | 1.49E-09                      | <b>0.000225</b>               |
| SpM1_ChORF0349_s_at     | <i>greA</i>   | <i>spy0349</i>                         | RNA metabolism          | Basic transcription machinery      | Basic transcription machinery        | -                                     | -                                         | 286.23                                | -406.68                               | -504.59                               | -509.27                            | 6.57E-09                    | <b>7.91E-06</b>             | 1.44E-08                      | <b>0.000225</b>               |

| Probe Set Name*        | Gene Name       | Synonym         | Category                | Subcategory                            | Function                               | <i>Bacillus subtilis</i> <sup>†</sup> | <i>Staphylococcus aureus</i> <sup>†</sup> | Difference Time (30 - 0) <sup>‡</sup> | Difference Time (60 - 0) <sup>‡</sup> | Difference Time (90 - 0) <sup>‡</sup> | Difference (Mut - WT) <sup>‡</sup> | P-value (Time) <sup>§</sup> | Q-value (Time) <sup>§</sup> | P-value (Strain) <sup>§</sup> | Q-value (Strain) <sup>§</sup> |
|------------------------|-----------------|-----------------|-------------------------|----------------------------------------|----------------------------------------|---------------------------------------|-------------------------------------------|---------------------------------------|---------------------------------------|---------------------------------------|------------------------------------|-----------------------------|-----------------------------|-------------------------------|-------------------------------|
| SpM1_ChORF1654_s_at    | -               | <i>spy1653</i>  | Cofactors               | NAD                                    | NAD biosynthesis                       | -                                     | -                                         | 286.22                                | -151.65                               | -65.66                                | -169.81                            | 2.64E-08                    | <b>7.91E-06</b>             | 0.0003862                     | <b>0.000267</b>               |
| SpM1_ChORF2116_s_at    | <i>recA</i>     | <i>spy2116</i>  | DNA metabolism          | DNA replication, modification & repair | DNA replication, modification & repair | -                                     | -                                         | 285.84                                | -217.33                               | -601.70                               | 338.01                             | 1.33E-09                    | <b>7.91E-06</b>             | 0.0004732                     | <b>0.000284</b>               |
| SpM1_ChORF0022_s_at    | <i>plsX</i>     | <i>spy0022</i>  | Cell envelope           | Membrane lipids                        | Fatty acid biosynthesis                | Essential                             | Essential                                 | 282.74                                | 290.56                                | -17.95                                | -40.26                             | 1.12E-08                    | <b>7.91E-06</b>             | 0.1779165                     | 0.039548                      |
| SpM1_ChORF2184_s_at    | -               | <i>spy2184</i>  | Unknown                 | Hypothetical protein                   | Unknown                                | -                                     | -                                         | 279.64                                | -406.06                               | -617.33                               | -204.37                            | 4.10E-22                    | <b>7.91E-06</b>             | 3.40E-06                      | <b>0.000225</b>               |
| SpM1_ChORF1572_s_at    | -               | <i>spy1572</i>  | Unknown                 | Hypothetical cytosolic Protein         | Unknown                                | -                                     | -                                         | 277.17                                | 56.45                                 | -1.76                                 | -38.20                             | 4.06E-18                    | <b>7.91E-06</b>             | 0.0034094                     | 0.001059                      |
| SpM1_ChORF0094_s_at    | <i>adcB</i>     | <i>spy0094</i>  | Membrane transport      | Membrane transport                     | Metal ion membrane transport           | Essential                             | Essential                                 | 277.05                                | 198.45                                | 288.38                                | -135.77                            | 4.22E-17                    | <b>7.91E-06</b>             | 3.74E-08                      | <b>0.000225</b>               |
| SpM12_ChORF263-13_s_at | <i>asnS</i>     | <i>spy0651</i>  | Protein synthesis       | tRNA synthetases                       | tRNA synthetase                        | -                                     | -                                         | 275.73                                | 82.46                                 | 31.46                                 | -229.32                            | 1.86E-26                    | <b>7.91E-06</b>             | 2.92E-30                      | <b>0.000225</b>               |
| SpM1_ChORF2196_s_at    | <i>pgsA</i>     | <i>spy2196</i>  | Cell envelope           | Membrane lipids                        | Phospholipids biosynthesis             | -                                     | -                                         | 274.30                                | 12.29                                 | -91.33                                | -118.14                            | 4.52E-19                    | <b>7.91E-06</b>             | 1.54E-09                      | <b>0.000225</b>               |
| SpM1_ChORF1275_s_at    | -               | <i>spy1275</i>  | Membrane transport      | Membrane transport                     | Amino acid membrane transport          | -                                     | -                                         | 273.86                                | 214.65                                | 185.14                                | -210.15                            | 1.07E-11                    | <b>7.91E-06</b>             | 6.92E-13                      | <b>0.000225</b>               |
| SpM1_ChORF0454_s_at    | <i>mtsB</i>     | <i>spy0454</i>  | Membrane transport      | Membrane transport                     | Metal ion membrane transport           | -                                     | -                                         | 272.72                                | 87.76                                 | 56.31                                 | -63.58                             | 0.000238                    | <b>9.12E-06</b>             | 0.0380704                     | 0.009744                      |
| SpM1_ChORF1173_s_at    | <i>gid</i>      | <i>spy1173</i>  | DNA metabolism          | Packaging & segregation                | DNA packaging                          | -                                     | -                                         | 270.45                                | 141.15                                | 155.59                                | -196.87                            | 3.36E-10                    | <b>7.91E-06</b>             | 1.15E-11                      | <b>0.000225</b>               |
| SpM1_ChORF1695_s_at    | -               | <i>spy1695</i>  | Membrane transport      | Membrane transport                     | Unknown substrate membrane transport   | -                                     | -                                         | 268.21                                | 111.71                                | 157.27                                | -128.53                            | 2.74E-18                    | <b>7.91E-06</b>             | 2.51E-11                      | <b>0.000225</b>               |
| SpM1_ChORF0374_s_at    | -               | <i>spy0374</i>  | Cell envelope           | Cell wall                              | Virulence interacting proteins         | -                                     | -                                         | 268.19                                | 160.74                                | 68.26                                 | 151.28                             | 7.67E-06                    | <b>7.91E-06</b>             | 5.36E-05                      | <b>0.000225</b>               |
| SpM1_ChORF0436_at      | <i>speJ</i>     | <i>spy0436</i>  | Virulence               | Virulence interacting proteins         | Pyrogenic Toxin Superantigen           | -                                     | -                                         | 264.22                                | 86.58                                 | 9.62                                  | -139.71                            | 1.48E-08                    | <b>7.91E-06</b>             | 1.96E-07                      | <b>0.000225</b>               |
| M12_1023_s_at          | -               | <i>M12_1023</i> | Lipid metabolism        | Isoprenoids                            | Isoprenoid biosynthesis                | -                                     | -                                         | 263.59                                | 71.55                                 | 80.01                                 | -155.77                            | 2.53E-11                    | <b>7.91E-06</b>             | 4.83E-10                      | <b>0.000225</b>               |
| SpM1_ChORF2093_s_at    | <i>tsf</i>      | <i>spy2093</i>  | Protein synthesis       | Translation factors                    | Translation factor                     | -                                     | -                                         | 262.31                                | -207.04                               | -224.62                               | -193.55                            | 7.72E-15                    | <b>7.91E-06</b>             | 1.17E-05                      | <b>0.000225</b>               |
| SpM1_ChORF0261_s_at    | -               | <i>spy0261</i>  | Unknown                 | Hypothetical protein                   | Unknown                                | -                                     | -                                         | 261.25                                | 14.37                                 | 408.91                                | -3.74                              | 3.71E-10                    | <b>7.91E-06</b>             | 0.6735649                     | 0.130996                      |
| SpM1_ChORF1839_s_at    | -               | <i>spy1839</i>  | Unknown                 | Hypothetical protein                   | Unknown                                | -                                     | -                                         | 259.80                                | 129.49                                | 63.72                                 | -36.00                             | 2.18E-25                    | <b>7.91E-06</b>             | 0.0009557                     | <b>0.000384</b>               |
| SpM1_ChORF2150_s_at    | <i>ahrC</i>     | <i>spy2150</i>  | RNA metabolism          | Transcription regulation               | Regulation                             | -                                     | -                                         | 256.08                                | 155.36                                | 97.18                                 | 49.01                              | 6.15E-16                    | <b>7.91E-06</b>             | 0.0165998                     | 0.00459                       |
| SpM1_ChORF1140_s_at    | <i>tdk2</i>     | <i>spy1140</i>  | Nucleotides             | Nucleotides biosynthesis               | Pyrimidine biosynthesis                | -                                     | -                                         | 255.57                                | 50.94                                 | -7.60                                 | -19.23                             | 1.32E-23                    | <b>7.91E-06</b>             | 0.0370389                     | 0.009495                      |
| SpM1_ChORF0274_s_at    | <i>plr, gap</i> | <i>spy0274</i>  | Carbohydrate metabolism | Bioenergetics                          | Glycolysis                             | -                                     | -                                         | 253.16                                | -653.37                               | -617.67                               | -35.51                             | 2.04E-05                    | <b>7.91E-06</b>             | 0.7108579                     | 0.137186                      |
| SpM1_ChORF0724_s_at    | <i>rplS</i>     | <i>spy0724</i>  | Protein synthesis       | Ribosomal proteins                     | Ribosomal protein                      | -                                     | -                                         | 250.80                                | 21.71                                 | 263.41                                | 225.49                             | 1.73E-09                    | <b>7.91E-06</b>             | 2.96E-10                      | <b>0.000225</b>               |
| SpM1_ChORF0817_s_at    | <i>thil</i>     | <i>spy0817</i>  | Cofactors               | Protein synthesis                      | tRNA synthetase                        | -                                     | -                                         | 250.17                                | -67.64                                | -131.86                               | -61.46                             | 1.15E-18                    | <b>7.91E-06</b>             | 0.0059934                     | 0.001785                      |
| SpM1_ChORF0239_s_at    | <i>gltX</i>     | <i>spy0239</i>  | Protein synthesis       | tRNA synthetases                       | tRNA synthetase                        | -                                     | -                                         | 249.69                                | -131.00                               | -212.52                               | -26.08                             | 4.39E-20                    | <b>7.91E-06</b>             | 0.169578                      | 0.037814                      |

| Probe Set Name*        | Gene Name         | Synonym                                  | Category                | Subcategory                    | Function                        | <i>Bacillus subtilis</i> <sup>†</sup> | <i>Staphylococcus aureus</i> <sup>†</sup> | Difference Time (30 - 0) <sup>‡</sup> | Difference Time (60 - 0) <sup>‡</sup> | Difference Time (90 - 0) <sup>‡</sup> | Difference (Mut - WT) <sup>‡</sup> | P-value (Time) <sup>§</sup> | Q-value (Time) <sup>§</sup> | P-value (Strain) <sup>§</sup> | Q-value (Strain) <sup>§</sup> |
|------------------------|-------------------|------------------------------------------|-------------------------|--------------------------------|---------------------------------|---------------------------------------|-------------------------------------------|---------------------------------------|---------------------------------------|---------------------------------------|------------------------------------|-----------------------------|-----------------------------|-------------------------------|-------------------------------|
| SpM1_ChORF1356_s_at    | -                 | <i>spy1356</i>                           | Unknown                 | Hypothetical protein           | Unknown                         | -                                     | -                                         | 246.86                                | 179.50                                | 78.58                                 | 827.87                             | 2.42E-06                    | <b>7.91E-06</b>             | 2.31E-36                      | <b>0.000225</b>               |
| SpM1_ChORF2188_s_at    | <i>trmU</i>       | <i>spy2188</i>                           | RNA metabolism          | RNA modification               | RNA modification                | -                                     | -                                         | 245.57                                | -4.13                                 | 55.68                                 | -47.59                             | 2.18E-15                    | <b>7.91E-06</b>             | 0.01494                       | 0.00416                       |
| SpM1_ChORF1514_s_at    | <i>divIVA S</i>   | <i>spy1514</i>                           | Cell shape and division | Cell shape & division          | Cell division                   | -                                     | -                                         | 245.48                                | 115.26                                | -273.02                               | -25.80                             | 6.33E-13                    | <b>7.91E-06</b>             | 0.2635333                     | 0.056471                      |
| SpM1_ChORF1718_s_at    | -                 | <i>spy1718</i>                           | Unknown                 | Hypothetical protein           | Unknown                         | -                                     | -                                         | 244.92                                | -2.09                                 | -99.62                                | -199.81                            | 6.19E-16                    | <b>7.91E-06</b>             | 1.16E-14                      | <b>0.000225</b>               |
| SpM1_ChORF2185_at      | <i>gidA</i>       | <i>spy2185</i>                           | Cell shape and division | Cell shape & division          | Cell division                   | -                                     | -                                         | 244.79                                | 116.88                                | 130.86                                | -79.45                             | 7.04E-18                    | <b>7.91E-06</b>             | 8.17E-07                      | <b>0.000225</b>               |
| SpM1_ChORF0816_s_at    | <i>nifS, yrvO</i> | <i>spy0816</i>                           | Cofactors               | Fe-sulfate cluster             | Fe-sulfate cluster biosynthesis | -                                     | -                                         | 244.76                                | -31.67                                | -51.82                                | -82.05                             | 7.14E-21                    | <b>7.91E-06</b>             | 1.58E-06                      | <b>0.000225</b>               |
| SpM1_ChORF1122_s_at    | <i>nifS, yrvO</i> | <i>spy1122</i>                           | Cofactors               | Fe-sulfate cluster             | Fe-sulfate cluster biosynthesis | Essential                             | -                                         | 243.70                                | -802.47                               | -1225.56                              | -300.32                            | 1.26E-16                    | <b>7.91E-06</b>             | 0.0005004                     | <b>0.000289</b>               |
| SpM1_ChORF1171_s_at    | <i>satD</i>       | <i>spy1171</i>                           | Unknown                 | Hypothetical protein           | Unknown                         | Essential                             | -                                         | 238.35                                | 258.26                                | 205.97                                | 75.69                              | 1.93E-25                    | <b>7.91E-06</b>             | 5.31E-05                      | <b>0.000225</b>               |
| SpM1_ChORF1241_s_at    | <i>pstB</i>       | <i>spy1241</i>                           | Membrane transport      | Membrane transport             | Ion membrane transport          | -                                     | -                                         | 238.10                                | 59.26                                 | -125.61                               | 209.39                             | 5.47E-13                    | <b>7.91E-06</b>             | 7.62E-11                      | <b>0.000225</b>               |
| SpM1_ChORF0410_s_at    | -                 | <i>spy0410</i>                           | Unknown                 | Hypothetical Cytosolic Protein | Unknown                         | -                                     | -                                         | 234.64                                | 290.78                                | 232.77                                | -84.32                             | 4.99E-25                    | <b>7.91E-06</b>             | 9.86E-09                      | <b>0.000225</b>               |
| SpM5_ChORFJ7578C-342_  | -                 | <i>SpyoM5_Chr ORF_J7578C e05.s1c_342</i> | Unknown                 | Hypothetical protein           | Unknown                         | -                                     | -                                         | 234.63                                | 70.07                                 | 68.81                                 | 170.15                             | 2.42E-11                    | <b>7.91E-06</b>             | 2.78E-13                      | <b>0.000225</b>               |
| SpM1_ChORF1983_at      | <i>sclA</i>       | <i>spy1983</i>                           | Virulence               | Virulence interacting proteins | Cell surface protein            | -                                     | -                                         | 233.91                                | 159.13                                | -32.26                                | 66.82                              | 1.57E-10                    | <b>7.91E-06</b>             | 0.0697697                     | 0.016863                      |
| SpM1_ChORF0053_x_at    | <i>rpsS</i>       | <i>spy0053</i>                           | Protein synthesis       | Ribosomal proteins             | Ribosomal protein               | -                                     | -                                         | 233.62                                | -329.85                               | -485.75                               | -265.65                            | 6.98E-07                    | <b>7.91E-06</b>             | 0.0388464                     | 0.009907                      |
| SpM1_ChORF0002_s_at    | <i>dnaA</i>       | <i>spy0002</i>                           | DNA metabolism          | Basic replication machinery    | DNA replication                 | -                                     | -                                         | 231.54                                | 78.11                                 | -31.30                                | -179.32                            | 1.19E-08                    | <b>7.91E-06</b>             | 5.70E-09                      | <b>0.000225</b>               |
| SpM1_ChORF1871_s_at    | <i>rpsN2</i>      | <i>spy1871</i>                           | Protein synthesis       | Ribosomal proteins             | Ribosomal protein               | -                                     | -                                         | 230.18                                | 113.36                                | 218.25                                | -185.36                            | 1.82E-10                    | <b>7.91E-06</b>             | 1.01E-11                      | <b>0.000225</b>               |
| SpM1_ChORF0020_s_at    | <i>prsA.2</i>     | <i>spy0020</i>                           | Carbohydrate metabolism | Bioenergetics                  | Glycolysis                      | -                                     | -                                         | 229.38                                | -98.91                                | -124.85                               | 57.20                              | 5.62E-18                    | <b>7.91E-06</b>             | 0.0024854                     | 0.000801                      |
| SpM1_ChORF1866_s_at    | -                 | <i>spy1866</i>                           | Unknown                 | Hypothetical cytosolic Protein | Unknown                         | -                                     | -                                         | 229.13                                | 214.91                                | 291.95                                | -97.63                             | 8.90E-18                    | <b>7.91E-06</b>             | 5.51E-07                      | <b>0.000225</b>               |
| SpM1_ChORF1861_s_at    | -                 | <i>spy1861</i>                           | Phage                   | Phage proteins                 | Phage regulatory proteins       | -                                     | -                                         | 226.78                                | 179.13                                | 119.04                                | -43.18                             | 1.76E-18                    | <b>7.91E-06</b>             | 0.0004962                     | <b>0.000289</b>               |
| SpM12_ChORF279-21_s_at | -                 | <i>spy0223</i>                           | Unknown                 | Hypothetical protein           | Unknown                         | -                                     | -                                         | 226.73                                | 77.10                                 | 50.30                                 | -92.05                             | 3.03E-26                    | <b>7.91E-06</b>             | 3.95E-16                      | <b>0.000225</b>               |
| SpM1_ChORF1221_s_at    | <i>dpfB</i>       | <i>spy1221</i>                           | Unknown                 | Hypothetical protein           | Unknown                         | -                                     | -                                         | 226.36                                | 124.69                                | 50.69                                 | -5.51                              | 1.44E-14                    | <b>7.91E-06</b>             | 0.4996912                     | 0.101155                      |
| SpM1_ChORF1202_s_at    | -                 | <i>spy1202</i>                           | RNA metabolism          | Transcription r egulation      | Unknown                         | -                                     | -                                         | 223.69                                | 17.18                                 | 29.97                                 | -62.23                             | 3.81E-11                    | <b>7.91E-06</b>             | 0.0004965                     | <b>0.000289</b>               |
| SpM1_ChORF1372_s_at    | <i>pstI</i>       | <i>spy1372</i>                           | Carbohydrate metabolism | Carbohydrate assimilation      | Carbohydrate assimilation       | Essential                             | Essential                                 | 223.11                                | -736.24                               | -1312.97                              | -101.53                            | 2.23E-24                    | <b>7.91E-06</b>             | 0.1306552                     | 0.029758                      |
| SpM1_ChORF1699_s_at    | -                 | <i>spy1699</i>                           | Unknown                 | Hypothetical cytosolic Protein | Unknown                         | -                                     | -                                         | 222.75                                | 75.64                                 | 75.32                                 | -58.83                             | 5.41E-11                    | <b>7.91E-06</b>             | 0.0007426                     | <b>0.000337</b>               |

| Probe Set Name*     | Gene Name        | Synonym        | Category                | Subcategory                    | Function                             | <i>Bacillus subtilis</i> <sup>†</sup> | <i>Staphylococcus aureus</i> <sup>†</sup> | Difference Time (30 - 0) <sup>‡</sup> | Difference Time (60 - 0) <sup>‡</sup> | Difference Time (90 - 0) <sup>‡</sup> | Difference (Mut - WT) <sup>‡</sup> | P-value (Time) <sup>§</sup> | Q-value (Time) <sup>§</sup> | P-value (Strain) <sup>§</sup> | Q-value (Strain) <sup>§</sup> |
|---------------------|------------------|----------------|-------------------------|--------------------------------|--------------------------------------|---------------------------------------|-------------------------------------------|---------------------------------------|---------------------------------------|---------------------------------------|------------------------------------|-----------------------------|-----------------------------|-------------------------------|-------------------------------|
| SpM1_ChORF1141_s_at | <i>prfA</i>      | <i>spy1141</i> | Protein synthesis       | Translation factors            | Translation factor                   | Essential                             | Essential                                 | 222.18                                | -64.25                                | -144.13                               | -22.77                             | 7.01E-20                    | <b>7.91E-06</b>             | 0.1487036                     | 0.033478                      |
| SpM1_ChORF1416_s_at | <i>prfC</i>      | <i>spy1416</i> | Protein synthesis       | Translation factors            | Translation factor                   | -                                     | -                                         | 221.48                                | 231.11                                | 418.55                                | 213.80                             | 2.07E-05                    | <b>7.91E-06</b>             | 0.0002408                     | <b>0.000243</b>               |
| SpM1_ChORF0319_s_at | -                | <i>spy0319</i> | Membrane transport      | Membrane transport             | Unknown substrate membrane transport | -                                     | -                                         | 220.22                                | -13.52                                | -72.67                                | 56.51                              | 2.50E-05                    | <b>7.91E-06</b>             | 0.2440947                     | 0.052724                      |
| SpM1_ChORF0821_s_at | -                | <i>spy0821</i> | Unknown                 | Hypothetical Cytosolic Protein | Unknown                              | -                                     | -                                         | 219.89                                | -402.93                               | -189.94                               | -46.85                             | 3.96E-07                    | <b>7.91E-06</b>             | 0.9997997                     | 0.182524                      |
| SpM1_ChORF2155_s_at | -                | <i>spy2155</i> | Unknown                 | Hypothetical membrane protein  | Unknown                              | -                                     | -                                         | 218.93                                | 217.52                                | 113.99                                | -227.53                            | 7.13E-13                    | <b>7.91E-06</b>             | 1.68E-17                      | <b>0.000225</b>               |
| SpM1_ChORF2207_s_at | <i>trsA/trpA</i> | <i>spy2207</i> | Protein synthesis       | tRNA synthetases               | tRNA synthetase                      | -                                     | -                                         | 218.56                                | 263.99                                | -64.15                                | -143.86                            | 9.06E-15                    | <b>7.91E-06</b>             | 1.83E-07                      | <b>0.000225</b>               |
| SpM1_ChORF0778_s_at | -                | <i>spy0778</i> | Membrane transport      | Membrane transport             | Amino acid membrane transport        | -                                     | -                                         | 218.05                                | 34.95                                 | -106.03                               | -301.56                            | 0.0006101                   | <b>1.22E-05</b>             | 1.10E-07                      | <b>0.000225</b>               |
| SpM1_ChORF1350_s_at | <i>psr</i>       | <i>spy1350</i> | RNA metabolism          | Transcription regulation       |                                      | Essential                             | Essential                                 | 217.49                                | 72.54                                 | 53.12                                 | 1362.27                            | 0.0111738                   | <b>0.000144</b>             | 9.74E-37                      | <b>0.000225</b>               |
| SpM1_ChORF1842_s_at | <i>spi</i>       | <i>spy1842</i> | Protein synthesis       | Protein translocation          | Protein secretion                    | -                                     | -                                         | 216.93                                | 68.59                                 | -21.85                                | -53.93                             | 3.43E-12                    | <b>7.91E-06</b>             | 0.0024752                     | 0.000799                      |
| SpM1_ChORF1840_s_at | -                | <i>spy1840</i> | Unknown                 | Hypothetical cytosolic Protein | Unknown                              | -                                     | -                                         | 216.40                                | -28.65                                | -96.17                                | -50.14                             | 4.80E-13                    | <b>7.91E-06</b>             | 0.0244171                     | 0.006555                      |
| SpM1_ChORF0392_s_at | <i>upp</i>       | <i>spy0392</i> | Nucleotides             | Nucleotides biosynthesis       | Purine, pyrimidine biosynthesis      | -                                     | -                                         | 215.87                                | -724.82                               | -723.03                               | -185.30                            | 6.72E-25                    | <b>7.91E-06</b>             | 0.0007476                     | <b>0.000338</b>               |
| SpM1_ChORF0466_s_at | <i>msrA.2</i>    | <i>spy0466</i> | Protein synthesis       | Protein folding & modification | Protein modification                 | -                                     | -                                         | 215.50                                | 297.72                                | 290.25                                | -117.69                            | 2.12E-16                    | <b>7.91E-06</b>             | 4.42E-07                      | <b>0.000225</b>               |
| SpM1_ChORF0197_s_at | <i>nadC</i>      | <i>spy0197</i> | Cofactors               | NAD                            | NAD biosynthesis                     | -                                     | -                                         | 214.76                                | 90.63                                 | 32.76                                 | -30.75                             | 1.96E-17                    | <b>7.91E-06</b>             | 0.0063974                     | 0.0019                        |
| SpM1_ChORF0621_s_at | -                | <i>spy0621</i> | Unknown                 | Hypothetical protein           | Unknown                              | -                                     | -                                         | 213.04                                | -28.68                                | -83.04                                | -129.57                            | 1.49E-26                    | <b>7.91E-06</b>             | 3.47E-18                      | <b>0.000225</b>               |
| SpM1_ChORF0598_s_at | -                | <i>spy0598</i> | Carbohydrate metabolism | Bioenergetics                  |                                      | -                                     | -                                         | 211.42                                | 51.38                                 | -49.97                                | 90.36                              | 5.78E-22                    | <b>7.91E-06</b>             | 5.57E-09                      | <b>0.000225</b>               |
| SpM1_ChORF1274_s_at | -                | <i>spy1274</i> | Membrane transport      | Membrane transport             | Amino acid membrane transport        | -                                     | -                                         | 211.41                                | 161.01                                | 103.71                                | -196.44                            | 9.99E-11                    | <b>7.91E-06</b>             | 3.78E-15                      | <b>0.000225</b>               |
| SpM1_ChORF0260_s_at | -                | <i>spy0260</i> | Unknown                 | Hypothetical protein           | Unknown                              | -                                     | -                                         | 210.03                                | 31.18                                 | 355.60                                | 49.48                              | 5.83E-09                    | <b>7.91E-06</b>             | 0.3577607                     | 0.074927                      |
| SpM1_ChORF1741_s_at | <i>manO</i>      | <i>spy1741</i> | Membrane transport      | Membrane transport             | Carbohydrate membrane transport      | -                                     | -                                         | 209.57                                | 31.79                                 | -49.79                                | -4.32                              | 6.84E-18                    | <b>7.91E-06</b>             | 0.5581453                     | 0.111385                      |
| SpM1_ChORF0619_s_at | -                | <i>spy0619</i> | Unknown                 | Hypothetical protein           | Unknown                              | -                                     | -                                         | 206.53                                | 372.90                                | 481.08                                | -237.19                            | 6.83E-09                    | <b>7.91E-06</b>             | 1.59E-05                      | <b>0.000225</b>               |
| SpM1_ChORF1659_s_at | -                | <i>spy1658</i> | Membrane transport      | Membrane transport             | Amino acid membrane transport        | -                                     | -                                         | 206.14                                | -152.71                               | -197.78                               | 88.00                              | 8.39E-20                    | <b>7.91E-06</b>             | 0.0001409                     | <b>0.00023</b>                |
| SpM1_ChORF1172_s_at | <i>satE</i>      | <i>spy1172</i> | Unknown                 | Hypothetical protein           | Unknown                              | Essential                             | -                                         | 203.67                                | 224.01                                | 208.01                                | 52.65                              | 5.92E-20                    | <b>7.91E-06</b>             | 0.0043893                     | 0.001338                      |
| SpM1_ChORF0060_s_at | <i>rpsQ</i>      | <i>spy0060</i> | Protein synthesis       | Ribosomal proteins             | Ribosomal protein                    | -                                     | -                                         | 201.53                                | -784.95                               | -1302.49                              | -621.72                            | 3.19E-08                    | <b>7.91E-06</b>             | 0.0053576                     | 0.001608                      |
| SpM1_ChORF0457_s_at | -                | <i>spy0457</i> | Unknown                 | Hypothetical protein           | Unknown                              | -                                     | -                                         | 199.99                                | 9.27                                  | 44.65                                 | 49.00                              | 1.91E-05                    | <b>7.91E-06</b>             | 0.1293219                     | 0.02955                       |

| Probe Set Name*         | Gene Name   | Synonym                              | Category                | Subcategory                            | Function                               | <i>Bacillus subtilis</i> † | <i>Staphylococcus aureus</i> † | Difference Time (30 - 0)‡ | Difference Time (60 - 0)‡ | Difference Time (90 - 0)‡ | Difference (Mut - WT)‡ | P-value (Time)§ | Q-value (Time)§ | P-value (Strain)§ | Q-value (Strain)§ |
|-------------------------|-------------|--------------------------------------|-------------------------|----------------------------------------|----------------------------------------|----------------------------|--------------------------------|---------------------------|---------------------------|---------------------------|------------------------|-----------------|-----------------|-------------------|-------------------|
| SpM1_ChORF0201_s_at     | -           | <i>spy0201</i>                       | Unknown                 | Hypothetical cytosolic protein         | Unknown                                | -                          | -                              | 198.82                    | 261.44                    | 277.27                    | 26.68                  | 4.65E-09        | <b>7.91E-06</b> | 0.4105868         | 0.084728          |
| SpM1_ChORF0599_s_at     | -           | <i>spy0599</i>                       | RNA metabolism          | Transcription regulation               |                                        | Essential                  | Essential                      | 198.81                    | 24.73                     | -51.98                    | 79.16                  | 3.82E-17        | <b>7.91E-06</b> | 2.84E-06          | <b>0.000225</b>   |
| SpM1_ChORF1400_s_at     | <i>queA</i> | <i>spy1400</i>                       | RNA metabolism          | RNA modification                       | RNA modification                       | -                          | -                              | 196.23                    | 24.52                     | 17.03                     | -184.19                | 2.33E-14        | <b>7.91E-06</b> | 2.99E-21          | <b>0.000225</b>   |
| SpM1_ChORF1852_s_at     | -           | <i>spy1852</i>                       | Unknown                 | Hypothetical protein                   | Unknown                                | -                          | -                              | 196.10                    | 46.32                     | 91.34                     | -99.72                 | 2.33E-15        | <b>7.91E-06</b> | 7.32E-11          | <b>0.000225</b>   |
| SpM1_ChORF0062_s_at     | <i>rplX</i> | <i>spy0062</i>                       | Protein synthesis       | Ribosomal proteins                     | Ribosomal protein                      | Essential                  | -                              | 195.31                    | -819.91                   | -1555.74                  | -560.31                | 6.32E-12        | <b>7.91E-06</b> | 0.0036181         | 0.001115          |
| SpM1_ChORF1036_s_at     | -           | <i>spy1036</i>                       | Unknown                 | Hypothetical membrane protein          | Unknown                                | -                          | -                              | 195.00                    | 166.53                    | 4.00                      | 58.48                  | 1.43E-18        | <b>7.91E-06</b> | 0.0002847         | <b>0.00025</b>    |
| SpM1_ChORF1734_s_at     | -           | <i>spy1734</i>                       | Unknown                 | Hypothetical protein                   | Unknown                                | -                          | -                              | 189.89                    | 121.95                    | 217.00                    | -134.31                | 1.00E-16        | <b>7.91E-06</b> | 1.44E-13          | <b>0.000225</b>   |
| SpM1_ChORF0849_s_at     | <i>trmD</i> | <i>spy0849</i>                       | RNA metabolism          | RNA modification                       | RNA modification                       | -                          | -                              | 189.66                    | -28.27                    | -61.06                    | -68.69                 | 8.57E-18        | <b>7.91E-06</b> | 2.39E-06          | <b>0.000225</b>   |
| SpM1_ChORF1126_s_at     | -           | <i>spy1126</i>                       | Cofactors               | NAD                                    | NAD biosynthesis                       | -                          | -                              | 189.54                    | 5.43                      | -13.83                    | -93.65                 | 6.80E-13        | <b>7.91E-06</b> | 2.99E-08          | <b>0.000225</b>   |
| SpM1_ChORF0412_s_at     | <i>exoA</i> | <i>spy0412</i>                       | DNA metabolism          | DNA replication, modification & repair | DNA replication, modification & repair | -                          | -                              | 187.70                    | 21.40                     | -39.84                    | -91.38                 | 1.36E-18        | <b>7.91E-06</b> | 1.20E-11          | <b>0.000225</b>   |
| SpM5_ChORF270b-433_s_at | -           | <i>SpyoM5_Chr ORF_270b10.p1t_433</i> | Unknown                 | Hypothetical protein                   | Unknown                                | -                          | -                              | 187.02                    | 62.66                     | 75.32                     | -109.15                | 2.06E-06        | <b>7.91E-06</b> | 3.63E-05          | <b>0.000225</b>   |
| SpM1_ChORF0181_s_at     | -           | <i>spy0181</i>                       | RNA metabolism          | Transcription regulation               |                                        | -                          | -                              | 186.13                    | 119.65                    | 179.78                    | 22.48                  | 1.06E-18        | <b>7.91E-06</b> | 0.0378148         | 0.009686          |
| SpM1_ChORF0329_s_at     | <i>gidB</i> | <i>spy0329</i>                       | Cell shape and division | Cell shape & division                  | Cell division                          | -                          | Essential                      | 185.43                    | -5.55                     | -69.17                    | -50.25                 | 2.12E-21        | <b>7.91E-06</b> | 1.16E-05          | <b>0.000225</b>   |
| SpM1_ChORF2194_s_at     | -           | <i>spy2194</i>                       | Membrane transport      | Membrane transport                     | Metal ion membrane transport           | -                          | -                              | 185.31                    | 76.72                     | 47.08                     | -115.76                | 1.82E-16        | <b>7.91E-06</b> | 3.18E-15          | <b>0.000225</b>   |
| SpM1_ChORF1203_s_at     | -           | <i>spy1203</i>                       | Unknown                 | Hypothetical protein                   | Unknown                                | -                          | -                              | 184.55                    | 25.83                     | 12.17                     | -78.81                 | 2.60E-18        | <b>7.91E-06</b> | 1.33E-11          | <b>0.000225</b>   |
| SpM1_ChORF0262_s_at     | <i>ksgA</i> | <i>spy0262</i>                       | DNA metabolism          | DNA replication, modification & repair | DNA replication, modification & repair | -                          | -                              | 183.55                    | -58.78                    | 326.45                    | -34.63                 | 8.74E-08        | <b>7.91E-06</b> | 0.3407875         | 0.071628          |
| SpM1_ChORF1978_s_at     | <i>lrp</i>  | <i>spy1978</i>                       | Virulence               | Virulence interacting proteins         | Cell surface protein                   | -                          | -                              | 183.32                    | 171.15                    | 164.43                    | 41.32                  | 5.35E-20        | <b>7.91E-06</b> | 0.0008956         | <b>0.000371</b>   |
| SpM1_ChORF0731_s_at     | <i>eno</i>  | <i>spy0731</i>                       | Carbohydrate metabolism | Bioenergetics                          | Glycolysis                             | -                          | -                              | 182.46                    | -1709.93                  | -2345.83                  | -574.97                | 3.20E-14        | <b>7.91E-06</b> | 0.0033634         | 0.001046          |
| SpM1_ChORF1411_s_at     | -           | <i>spy1411</i>                       | Unknown                 | Hypothetical cytosolic protein         | Unknown                                | -                          | -                              | 182.22                    | 15.18                     | 14.09                     | -87.72                 | 6.84E-16        | <b>7.91E-06</b> | 8.10E-11          | <b>0.000225</b>   |
| SpM1_ChORF0508_s_at     | -           | <i>spy0508</i>                       | Unknown                 | Hypothetical membrane protein          | Unknown                                | -                          | -                              | 182.06                    | 21.31                     | -86.40                    | -71.70                 | 4.67E-14        | <b>7.91E-06</b> | 1.49E-05          | <b>0.000225</b>   |
| SpM1_ChORF0248_s_at     | -           | <i>spy0248</i>                       | Unknown                 | Hypothetical Cytosolic Protein         | Unknown                                | -                          | -                              | 181.99                    | 292.53                    | 122.57                    | -66.32                 | 3.93E-11        | <b>7.91E-06</b> | 0.001684          | <b>0.000574</b>   |
| SpM1_ChORF0327_s_at     | <i>ntpJ</i> | <i>spy0327</i>                       | Membrane transport      | Membrane transport                     | Ion membrane transport                 | -                          | -                              | 179.04                    | 45.42                     | -69.09                    | -101.63                | 2.10E-16        | <b>7.91E-06</b> | 1.13E-08          | <b>0.000225</b>   |

| Probe Set Name*      | Gene Name    | Synonym                     | Category              | Subcategory                            | Function                               | <i>Bacillus subtilis</i> <sup>†</sup> | <i>Staphylococcus aureus</i> <sup>†</sup> | Difference Time (30 - 0) <sup>‡</sup> | Difference Time (60 - 0) <sup>‡</sup> | Difference Time (90 - 0) <sup>‡</sup> | Difference (Mut - WT) <sup>‡</sup> | P-value (Time) <sup>§</sup> | Q-value (Time) <sup>§</sup> | P-value (Strain) <sup>§</sup> | Q-value (Strain) <sup>§</sup> |
|----------------------|--------------|-----------------------------|-----------------------|----------------------------------------|----------------------------------------|---------------------------------------|-------------------------------------------|---------------------------------------|---------------------------------------|---------------------------------------|------------------------------------|-----------------------------|-----------------------------|-------------------------------|-------------------------------|
| SpM1_ChORF0071_s_at  | <i>rpmD</i>  | <i>spy0071</i>              | Protein synthesis     | Ribosomal proteins                     | Ribosomal protein                      | -                                     | -                                         | 177.76                                | 272.70                                | -94.71                                | 43.77                              | 0.0458                      | <b>0.000566</b>             | 0.2610741                     | 0.056013                      |
| SpM1_ChORF0507_s_at  | -            | <i>spy0507</i>              | Unknown               | Hypothetical membrane protein          | Unknown                                | -                                     | -                                         | 177.52                                | 48.44                                 | -75.81                                | -167.20                            | 2.53E-07                    | <b>7.91E-06</b>             | 5.91E-09                      | <b>0.000225</b>               |
| SpM1_ChORF1359_s_at  | <i>metK</i>  | <i>spy1359</i>              | Cofactors             | S-adenosylmethionine                   | S-adenosylmethionine biosynthesis      | -                                     | -                                         | 177.05                                | -140.22                               | -173.80                               | -260.37                            | 1.18E-19                    | <b>7.91E-06</b>             | 1.82E-21                      | <b>0.000225</b>               |
| SpM1_ChORF0376_s_at  | -            | <i>spy0376</i>              | Unknown               | Hypothetical protein                   | Unknown                                | -                                     | -                                         | 174.82                                | 275.46                                | 190.15                                | 179.88                             | 3.02E-08                    | <b>7.91E-06</b>             | 4.61E-07                      | <b>0.000225</b>               |
| SpM18_ChORF0119_s_at | <i>pheT1</i> | <i>spyM18_0119</i>          | Protein synthesis     | tRNA synthetases                       | tRNA synthetase                        | -                                     | -                                         | 174.29                                | -29.10                                | -126.44                               | -137.54                            | 4.45E-26                    | <b>7.91E-06</b>             | 4.83E-19                      | <b>0.000225</b>               |
| SpM18_ChORF1663_s_at | -            | <i>spyM18_1663</i>          | Unknown               | Hypothetical protein                   | Unknown                                | -                                     | -                                         | 174.25                                | 281.55                                | 285.18                                | -174.44                            | 2.62E-15                    | <b>7.91E-06</b>             | 4.41E-12                      | <b>0.000225</b>               |
| SpM1_ChORF1010_s_at  | <i>mutX</i>  | <i>spy1010</i>              | DNA metabolism        | DNA replication, modification & repair | DNA replication, modification & repair | -                                     | -                                         | 174.24                                | 137.72                                | -31.98                                | 30.96                              | 4.03E-18                    | <b>7.91E-06</b>             | 0.2340058                     | 0.050701                      |
| SpM1_ChORF0435_at    | -            | <i>spy0435</i>              | Unknown               | Hypothetical protein                   | Unknown                                | -                                     | -                                         | 173.48                                | -54.90                                | -79.92                                | 26.45                              | 1.43E-21                    | <b>7.91E-06</b>             | 0.0421288                     | 0.010636                      |
| SpM1_ChORF1053_s_at  | <i>lepA</i>  | <i>spy1053</i>              | Protein synthesis     | Translation factors                    | Translation factor                     | Essential                             | -                                         | 172.06                                | 152.24                                | 288.35                                | 46.67                              | 8.92E-07                    | <b>7.91E-06</b>             | 0.099396                      | 0.023334                      |
| SpM1_ChORF0144_s_at  | -            | <i>spy0144</i>              | Unknown               | Hypothetical protein                   | Unknown                                | -                                     | -                                         | 170.89                                | 151.20                                | 110.23                                | -39.05                             | 2.25E-15                    | <b>7.91E-06</b>             | 0.0006271                     | <b>0.000313</b>               |
| SpM1_ChORF1945_s_at  | -            | <i>spy1945</i>              | Unknown               | Hypothetical cytosolic Protein         | Unknown                                | -                                     | -                                         | 169.65                                | 67.55                                 | -274.31                               | -275.04                            | 3.75E-09                    | <b>7.91E-06</b>             | 6.33E-08                      | <b>0.000225</b>               |
| SpM18_ChORF0118_s_at | <i>trxA</i>  | <i>spyM18_0118</i>          | Nucleotides           | Nucleotides biosynthesis               | Purine biosynthesis                    | -                                     | -                                         | 168.15                                | -32.64                                | -97.07                                | -87.09                             | 2.76E-19                    | <b>7.91E-06</b>             | 3.90E-09                      | <b>0.000225</b>               |
| SpM1_ChORF2157_s_at  | <i>hisS</i>  | <i>spy2157</i>              | Protein synthesis     | tRNA synthetases                       | tRNA synthetase                        | -                                     | -                                         | 167.26                                | -1.63                                 | -73.26                                | -93.30                             | 7.58E-25                    | <b>7.91E-06</b>             | 1.09E-14                      | <b>0.000225</b>               |
| SpM1_ChORF0912_s_at  | -            | <i>spy0912</i>              | Unknown               | Hypothetical Cytosolic Protein         | Unknown                                | -                                     | -                                         | 167.23                                | -26.71                                | -70.19                                | 36.47                              | 9.30E-18                    | <b>7.91E-06</b>             | 0.0104155                     | 0.002971                      |
| SpM1_ChORF0899_s_at  | -            | <i>spy0899</i>              | Unknown               | Hypothetical Cytosolic Protein         | Unknown                                | -                                     | -                                         | 166.65                                | 137.99                                | 111.77                                | 238.35                             | 0.0002182                   | <b>8.99E-06</b>             | 8.89E-12                      | <b>0.000225</b>               |
| SpM1_ChORF2058_s_at  | <i>secE</i>  | <i>spy2058</i>              | Protein synthesis     | Protein translocation                  | Protein secretion                      | -                                     | -                                         | 165.58                                | -144.11                               | -138.51                               | -81.29                             | 6.37E-12                    | <b>7.91E-06</b>             | 0.0086602                     | 0.002519                      |
| SpM1_ChORF1239_s_at  | <i>pepN</i>  | <i>spy1239</i>              | Amino acid metabolism | Amino acid catabolism                  | Amino acid catabolism                  | -                                     | -                                         | 165.01                                | -208.73                               | -645.42                               | 444.48                             | 1.67E-18                    | <b>7.91E-06</b>             | 4.31E-13                      | <b>0.000225</b>               |
| SpM12_ChORF299-13_at | -            | <i>SpyoM12_ChORF_299_13</i> | Unknown               | Hypothetical protein                   | Unknown                                | -                                     | -                                         | 164.21                                | 194.79                                | 136.45                                | -8.89                              | 2.25E-19                    | <b>7.91E-06</b>             | 0.2172486                     | 0.047644                      |
| SpM1_ChORF0462_s_at  | <i>pyrH</i>  | <i>spy0462</i>              | Nucleotides           | Nucleotides biosynthesis               | Pyrimidine biosynthesis                | Essential                             | Essential                                 | 164.01                                | -151.44                               | -143.62                               | -78.69                             | 4.44E-08                    | <b>7.91E-06</b>             | 0.0075379                     | 0.002215                      |
| SpM1_ChORF0550_s_at  | -            | <i>spy0550</i>              | Unknown               | Hypothetical Cytosolic Protein         | Unknown                                | -                                     | -                                         | 163.09                                | 21.76                                 | -15.12                                | -61.73                             | 4.63E-14                    | <b>7.91E-06</b>             | 2.36E-07                      | <b>0.000225</b>               |
| SpM1_ChORF1845_s_at  | -            | <i>spy1845</i>              | Unknown               | Hypothetical protein                   | Unknown                                | -                                     | -                                         | 162.54                                | 1031.46                               | 1378.22                               | 73.96                              | 2.07E-30                    | <b>7.91E-06</b>             | 0.1766119                     | 0.039283                      |
| SpM1_ChORF0552_s_at  | -            | <i>spy0552</i>              | Unknown               | Hypothetical Cytosolic Protein         | Unknown                                | -                                     | -                                         | 161.78                                | 32.83                                 | 9.06                                  | -60.11                             | 2.03E-11                    | <b>7.91E-06</b>             | 7.07E-06                      | <b>0.000225</b>               |



| Probe Set Name*        | Gene Name   | Synonym                     | Category              | Subcategory                            | Function                               | <i>Bacillus subtilis</i> <sup>†</sup> | <i>Staphylococcus aureus</i> <sup>†</sup> | Difference Time (30 - 0) <sup>‡</sup> | Difference Time (60 - 0) <sup>‡</sup> | Difference Time (90 - 0) <sup>‡</sup> | Difference (Mut - WT) <sup>‡</sup> | P-value (Time) <sup>§</sup> | Q-value (Time) <sup>§</sup> | P-value (Strain) <sup>§</sup> | Q-value (Strain) <sup>§</sup> |
|------------------------|-------------|-----------------------------|-----------------------|----------------------------------------|----------------------------------------|---------------------------------------|-------------------------------------------|---------------------------------------|---------------------------------------|---------------------------------------|------------------------------------|-----------------------------|-----------------------------|-------------------------------|-------------------------------|
| SpM1_ChORF2154_s_at    | -           | <i>spy2154</i>              | Unknown               | Hypothetical membrane protein          | Unknown                                | -                                     | -                                         | 161.34                                | 257.44                                | 193.38                                | -197.39                            | 1.70E-09                    | <b>7.91E-06</b>             | 3.49E-11                      | <b>0.000225</b>               |
| SpM1_ChORF0623_s_at    | <i>pacL</i> | <i>spy0623</i>              | Membrane transport    | Membrane transport                     | Ion membrane transport                 | -                                     | -                                         | 161.32                                | -40.00                                | 28.44                                 | -73.24                             | 0.009576                    | <b>0.000124</b>             | 0.0636022                     | 0.015544                      |
| SpM1_ChORF0437_at      | -           | <i>spy0437</i>              | Unknown               | Hypothetical protein                   | Unknown                                | -                                     | -                                         | 161.23                                | 44.24                                 | -13.97                                | -68.28                             | 3.59E-14                    | <b>7.91E-06</b>             | 1.78E-08                      | <b>0.000225</b>               |
| SpM1_ChORF1101_s_at    | <i>murB</i> | <i>spy1101</i>              | Cell envelope         | Cell wall                              | Peptidoglycan biosynthesis             | -                                     | -                                         | 160.55                                | -28.19                                | 7.72                                  | -42.40                             | 6.51E-17                    | <b>7.91E-06</b>             | 0.0018665                     | 0.000624                      |
| SpM1_ChORF0456_s_at    | <i>mtsC</i> | <i>spy0456</i>              | Membrane transport    | Membrane transport                     | Metal ion membrane transport           | -                                     | -                                         | 157.58                                | 96.62                                 | 47.97                                 | -51.01                             | 2.40E-10                    | <b>7.91E-06</b>             | 4.72E-05                      | <b>0.000225</b>               |
| SpM1_ChORF1940_s_at    | -           | <i>spy1940</i>              | Unknown               | Hypothetical cytosolic Protein         | Unknown                                | Essential                             | Essential                                 | 157.20                                | 170.36                                | -35.87                                | -136.67                            | 6.35E-12                    | <b>7.91E-06</b>             | 9.53E-10                      | <b>0.000225</b>               |
| SpM1_ChORF0259_s_at    | -           | <i>spy0259</i>              | RNA metabolism        | Transcription r egulation              |                                        | -                                     | -                                         | 156.10                                | 44.51                                 | -25.05                                | -68.96                             | 1.72E-11                    | <b>7.91E-06</b>             | 2.03E-05                      | <b>0.000225</b>               |
| SpM1_ChORF1102_s_at    | <i>potA</i> | <i>spy1102</i>              | Membrane transport    | Membrane transport                     | Polyamine membrane transport           | -                                     | -                                         | 155.97                                | -11.95                                | 34.33                                 | -80.63                             | 1.24E-07                    | <b>7.91E-06</b>             | 0.0006393                     | <b>0.000315</b>               |
| SpM18_ChORF0013_s_at   | <i>hpt</i>  | <i>spyM18_0013</i>          | Nucleotides           | Nucleotides biosynthesis               | Purine biosynthesis                    | -                                     | -                                         | 155.55                                | -93.30                                | -76.54                                | -150.15                            | 9.18E-14                    | <b>7.91E-06</b>             | 1.03E-12                      | <b>0.000225</b>               |
| SpM1_ChORF0882_s_at    | <i>thyA</i> | <i>spy0882</i>              | Nucleotides           | Nucleotides biosynthesis               | Pyrimidine biosynthesis                | -                                     | -                                         | 154.23                                | -74.24                                | -176.49                               | -16.17                             | 9.56E-25                    | <b>7.91E-06</b>             | 0.1071089                     | 0.024862                      |
| SpM1_ChORF0533_s_at    | -           | <i>spy0533</i>              | RNA metabolism        | Transcription r egulation              |                                        | -                                     | -                                         | 153.33                                | 93.63                                 | 82.88                                 | 7.67                               | 2.16E-22                    | <b>7.91E-06</b>             | 0.8569051                     | 0.159841                      |
| SpM1_ChORF1206_s_at    | -           | <i>spy1206</i>              | Membrane transport    | Membrane transport                     | Unknown substrate membrane transport   | -                                     | -                                         | 152.52                                | -12.21                                | -55.82                                | -36.47                             | 1.98E-18                    | <b>7.91E-06</b>             | 0.0024053                     | 0.000779                      |
| SpM1_ChORF1401_s_at    | -           | <i>spy1401</i>              | Unknown               | Hypothetical protein                   | Unknown                                | -                                     | -                                         | 152.20                                | -39.85                                | -31.18                                | -338.77                            | 6.23E-09                    | <b>7.91E-06</b>             | 1.10E-26                      | <b>0.000225</b>               |
| SpM1_ChORF0905_s_at    | <i>ung</i>  | <i>spy0905</i>              | DNA metabolism        | DNA replication, modification & repair | DNA replication, modification & repair | -                                     | -                                         | 151.81                                | 33.50                                 | -71.65                                | -93.59                             | 4.27E-15                    | <b>7.91E-06</b>             | 4.24E-09                      | <b>0.000225</b>               |
| SpM12_ChORF299-11_at   | -           | <i>SpyoM12_ChORF_299_11</i> | Unknown               | Hypothetical protein                   | Unknown                                | Essential                             | -                                         | 150.69                                | 135.92                                | -16.10                                | 79.11                              | 5.78E-13                    | <b>7.91E-06</b>             | 5.74E-06                      | <b>0.000225</b>               |
| SpM1_ChORF0606_s_at    | <i>pepF</i> | <i>spy0606</i>              | Amino acid metabolism | Amino acid catabolism                  | Amino acid catabolism                  | -                                     | -                                         | 150.62                                | 77.75                                 | -77.90                                | -55.48                             | 2.84E-19                    | <b>7.91E-06</b>             | 8.04E-06                      | <b>0.000225</b>               |
| SpM1_ChORF0073_s_at    | <i>secY</i> | <i>spy0073</i>              | Protein synthesis     | Protein translocation                  | Protein secretion                      | -                                     | -                                         | 150.10                                | 189.24                                | -163.91                               | 63.89                              | 0.179865                    | 0.002122                    | 0.1386472                     | 0.031374                      |
| SpM1_ChORF0844_s_at    | -           | <i>spy0844</i>              | Unknown               | Hypothetical protein                   | Unknown                                | -                                     | -                                         | 149.64                                | 21.52                                 | -54.17                                | -351.19                            | 1.29E-12                    | <b>7.91E-06</b>             | 1.40E-32                      | <b>0.000225</b>               |
| SpM12_ChORF300-26_s_at | -           | <i>SpyoM12_ChORF_300_26</i> | Unknown               | Hypothetical protein                   | Unknown                                | -                                     | -                                         | 147.75                                | 37.14                                 | 28.27                                 | -73.66                             | 2.31E-13                    | <b>7.91E-06</b>             | 2.69E-09                      | <b>0.000225</b>               |
| SpM1_ChORF2042_s_at    | <i>rgg</i>  | <i>spy2042</i>              | RNA metabolism        | Transcription r egulation              |                                        | -                                     | -                                         | 146.54                                | 70.74                                 | -8.31                                 | 115.89                             | 4.44E-12                    | <b>7.91E-06</b>             | 2.50E-12                      | <b>0.000225</b>               |
| SpM1_ChORF1538_s_at    | -           | <i>spy1538</i>              | Unknown               | Hypothetical protein                   | Unknown                                | -                                     | -                                         | 145.87                                | -36.14                                | -76.81                                | 116.48                             | 2.66E-16                    | <b>7.91E-06</b>             | 8.03E-11                      | <b>0.000225</b>               |
| SpM1_ChORF1124_s_at    | -           | <i>spy1124</i>              | Unknown               | Hypothetical Cytosolic Protein         | Unknown                                | -                                     | -                                         | 145.59                                | 25.18                                 | -12.31                                | -19.84                             | 9.60E-14                    | <b>7.91E-06</b>             | 0.0257186                     | 0.006859                      |

| Probe Set Name*         | Gene Name    | Synonym                              | Category              | Subcategory                    | Function                             | <i>Bacillus subtilis</i> <sup>†</sup> | <i>Staphylococcus aureus</i> <sup>†</sup> | Difference Time (30 - 0) <sup>‡</sup> | Difference Time (60 - 0) <sup>‡</sup> | Difference Time (90 - 0) <sup>‡</sup> | Difference (Mut - WT) <sup>‡</sup> | P-value (Time) <sup>§</sup> | Q-value (Time) <sup>§</sup> | P-value (Strain) <sup>§</sup> | Q-value (Strain) <sup>§</sup> |
|-------------------------|--------------|--------------------------------------|-----------------------|--------------------------------|--------------------------------------|---------------------------------------|-------------------------------------------|---------------------------------------|---------------------------------------|---------------------------------------|------------------------------------|-----------------------------|-----------------------------|-------------------------------|-------------------------------|
| SpM5_ChORF270b-538_s_at | -            | <i>SpyoM5_Chr ORF_270b10.p1t_538</i> | Unknown               | Hypothetical protein           | Unknown                              | -                                     | -                                         | 145.19                                | -131.75                               | -230.52                               | -268.76                            | 1.98E-20                    | <b>7.91E-06</b>             | 9.64E-21                      | <b>0.000225</b>               |
| SpM1_ChORF0762_s_at     | -            | <i>spy0762</i>                       | Unknown               | Hypothetical protein           | Unknown                              | -                                     | -                                         | 144.92                                | 25.64                                 | -9.74                                 | -32.02                             | 7.54E-14                    | <b>7.91E-06</b>             | 0.0051149                     | 0.001542                      |
| SpM1_ChORF0787_s_at     | <i>rgpBc</i> | <i>spy0787</i>                       | Cell envelope         | Cell wall                      | Peptidoglycan biosynthesis           | -                                     | -                                         | 144.74                                | -26.76                                | -134.93                               | 89.40                              | 2.51E-13                    | <b>7.91E-06</b>             | 2.04E-05                      | <b>0.000225</b>               |
| SpM1_ChORF1605_s_at     | <i>rocA</i>  | <i>spy1605</i>                       | RNA metabolism        | Transcription regulation       | Signal transduction                  | -                                     | -                                         | 144.21                                | 88.76                                 | 55.46                                 | 2.84                               | 2.95E-21                    | <b>7.91E-06</b>             | 0.8904462                     | 0.165053                      |
| SpM1_ChORF1782_s_at     | <i>asnB</i>  | <i>spy1782</i>                       | Amino acid metabolism | Amino acid catabolism          | Amino acid catabolism                | -                                     | -                                         | 143.89                                | 116.50                                | 79.06                                 | -117.27                            | 2.99E-18                    | <b>7.91E-06</b>             | 1.18E-20                      | <b>0.000225</b>               |
| SpM1_ChORF0843_s_at     | -            | <i>spy0843</i>                       | Unknown               | Hypothetical membrane protein  | Cell surface protein                 | -                                     | -                                         | 143.43                                | 10.37                                 | -38.56                                | -303.09                            | 3.03E-12                    | <b>7.91E-06</b>             | 2.65E-31                      | <b>0.000225</b>               |
| SpM1_ChORF0203_s_at     | <i>tgt</i>   | <i>spy0203</i>                       | Protein synthesis     | tRNA synthetases               | tRNA synthetase                      | Essential                             | -                                         | 143.42                                | -270.36                               | -344.49                               | -71.98                             | 2.68E-29                    | <b>7.91E-06</b>             | 0.0002158                     | <b>0.000239</b>               |
| SpM12_ChORF267-3_s_at   | -            | <i>SpyoM12_Chr ORF_267_3</i>         | Unknown               | Hypothetical protein           | Unknown                              | -                                     | -                                         | 142.15                                | -30.09                                | -79.98                                | -20.13                             | 8.89E-18                    | <b>7.91E-06</b>             | 0.0284417                     | 0.007498                      |
| SpM1_ChORF1728_s_at     | -            | <i>spy1728</i>                       | Membrane transport    | Membrane transport             | Unknown substrate membrane transport | -                                     | -                                         | 141.89                                | 129.14                                | -45.70                                | -27.25                             | 5.14E-18                    | <b>7.91E-06</b>             | 0.0056519                     | 0.001688                      |
| SpM1_ChORF1527_s_at     | <i>typA</i>  | <i>spy1527</i>                       | Other                 | GTP-binding protein            | GTP-binding                          | -                                     | -                                         | 141.51                                | -1119.25                              | -1288.45                              | -133.71                            | 4.51E-29                    | <b>7.91E-06</b>             | 0.0347858                     | 0.008962                      |
| SpM1_ChORF0356_s_at     | -            | <i>spy0356</i>                       | RNA metabolism        | RNA modification               | RNA modification                     | -                                     | -                                         | 141.16                                | -34.71                                | -38.62                                | -61.47                             | 1.26E-19                    | <b>7.91E-06</b>             | 8.47E-09                      | <b>0.000225</b>               |
| SpM1_ChORF1646_s_at     | -            | <i>spy1646</i>                       | Unknown               | Hypothetical cytosolic Protein | Unknown                              | -                                     | -                                         | 140.43                                | -11.94                                | -31.91                                | -54.86                             | 2.82E-07                    | <b>7.91E-06</b>             | 0.0107602                     | 0.003054                      |
| SpM1_ChORF1872_s_at     | -            | <i>spy1872</i>                       | Other                 | Unknown                        | Unknown                              | -                                     | -                                         | 139.35                                | -246.14                               | -378.71                               | -206.41                            | 4.81E-20                    | <b>7.91E-06</b>             | 1.10E-10                      | <b>0.000225</b>               |
| SpM1_ChORF1784_s_at     | -            | <i>spy1784</i>                       | Membrane transport    | Membrane transport             | Unknown substrate membrane transport | -                                     | -                                         | 138.08                                | -39.35                                | -67.14                                | -32.75                             | 6.92E-16                    | <b>7.91E-06</b>             | 0.0064119                     | 0.001903                      |
| SpM1_ChORF1608_s_at     | -            | <i>spy1608</i>                       | Unknown               | Hypothetical cytosolic Protein | Unknown                              | -                                     | -                                         | 137.86                                | 131.42                                | 1.42                                  | -23.68                             | 4.10E-10                    | <b>7.91E-06</b>             | 0.1525529                     | 0.034257                      |
| SpM1_ChORF1072_s_at     | <i>rpLJ</i>  | <i>spy1072</i>                       | Protein synthesis     | Ribosomal proteins             | Ribosomal protein                    | -                                     | -                                         | 137.60                                | -935.50                               | -1278.69                              | -61.87                             | 8.24E-22                    | <b>7.91E-06</b>             | 0.9083043                     | 0.167561                      |
| SpM1_ChORF1093_s_at     | <i>dacA</i>  | <i>spy1093</i>                       | Cell envelope         | Cell wall                      | Peptidoglycan biosynthesis           | -                                     | -                                         | 137.37                                | -7.80                                 | -34.73                                | -5.44                              | 4.15E-22                    | <b>7.91E-06</b>             | 0.2172275                     | 0.047644                      |
| SpM1_ChORF1873_s_at     | -            | <i>spy1873</i>                       | Protein synthesis     | Protein folding & modification | Protein modification                 | -                                     | -                                         | 136.39                                | -60.45                                | -144.25                               | -103.28                            | 5.45E-20                    | <b>7.91E-06</b>             | 4.57E-11                      | <b>0.000225</b>               |
| SpM1_ChORF1502_s_at     | <i>folD</i>  | <i>spy1502</i>                       | Cofactors             | Folate                         | Folate biosynthesis                  | -                                     | -                                         | 135.78                                | -31.84                                | -63.12                                | -36.80                             | 3.24E-17                    | <b>7.91E-06</b>             | 0.0005296                     | <b>0.000294</b>               |
| SpM1_ChORF2186_s_at     | -            | <i>spy2186</i>                       | Unknown               | Hypothetical cytosolic Protein | Unknown                              | -                                     | -                                         | 134.57                                | 36.12                                 | 18.23                                 | -41.91                             | 1.25E-15                    | <b>7.91E-06</b>             | 4.37E-06                      | <b>0.000225</b>               |
| SpM1_ChORF1290_s_at     | -            | <i>spy1290</i>                       | Membrane transport    | Membrane transport             | Unknown substrate membrane transport | -                                     | -                                         | 134.25                                | 3.08                                  | -64.66                                | -23.52                             | 2.24E-15                    | <b>7.91E-06</b>             | 0.0334224                     | 0.008662                      |
| SpM1_ChORF2199_s_at     | -            | <i>spy2199</i>                       | Unknown               | Hypothetical cytosolic Protein | Unknown                              | -                                     | -                                         | 134.15                                | -49.28                                | -62.73                                | -13.33                             | 1.06E-18                    | <b>7.91E-06</b>             | 0.1318576                     | 0.029973                      |

| Probe Set Name*       | Gene Name     | Synonym                    | Category              | Subcategory                            | Function                               | <i>Bacillus subtilis</i> <sup>†</sup> | <i>Staphylococcus aureus</i> <sup>†</sup> | Difference Time (30 - 0) <sup>‡</sup> | Difference Time (60 - 0) <sup>‡</sup> | Difference Time (90 - 0) <sup>‡</sup> | Difference (Mut - WT) <sup>‡</sup> | P-value (Time) <sup>§</sup> | Q-value (Time) <sup>§</sup> | P-value (Strain) <sup>§</sup> | Q-value (Strain) <sup>§</sup> |
|-----------------------|---------------|----------------------------|-----------------------|----------------------------------------|----------------------------------------|---------------------------------------|-------------------------------------------|---------------------------------------|---------------------------------------|---------------------------------------|------------------------------------|-----------------------------|-----------------------------|-------------------------------|-------------------------------|
| SpM12_ChORF291-7_s_at | -             | <i>SpyoM12_ChORF_291_7</i> | Unknown               | Hypothetical protein                   | Unknown                                | -                                     | -                                         | 133.93                                | -14.83                                | -58.95                                | -158.71                            | 3.06E-14                    | <b>7.91E-06</b>             | 3.05E-19                      | <b>0.000225</b>               |
| SpM3_ChORF0503_s_at   | -             | <i>SpyM3_0503</i>          | Unknown               | Hypothetical protein                   | Unknown                                | -                                     | -                                         | 133.82                                | 54.50                                 | 49.44                                 | -26.83                             | 9.86E-16                    | <b>7.91E-06</b>             | 0.0017064                     | <b>0.000581</b>               |
| SpM1_ChORF0590_s_at   | -             | <i>spy0590</i>             | Unknown               | Hypothetical Cytosolic Protein         | Unknown                                | -                                     | -                                         | 133.06                                | -8.50                                 | -41.28                                | -85.28                             | 8.93E-18                    | <b>7.91E-06</b>             | 1.12E-12                      | <b>0.000225</b>               |
| SpM1_ChORF1179_s_at   | -             | <i>spy1179</i>             | RNA metabolism        | Transcription regulation               |                                        | -                                     | -                                         | 132.44                                | 128.87                                | 81.35                                 | 129.98                             | 3.65E-13                    | <b>7.91E-06</b>             | 2.75E-16                      | <b>0.000225</b>               |
| SpM1_ChORF0051_s_at   | <i>rplW</i>   | <i>spy0051</i>             | Protein synthesis     | Ribosomal proteins                     | Ribosomal protein                      | -                                     | -                                         | 131.56                                | -230.95                               | -289.43                               | -150.91                            | 1.12E-08                    | <b>7.91E-06</b>             | 0.0111921                     | 0.003162                      |
| SpM1_ChORF0242_s_at   | <i>fasB</i>   | <i>spy0242</i>             | RNA metabolism        | Transcription regulation               | Signal transduction                    | -                                     | -                                         | 131.47                                | 5.07                                  | -33.73                                | -83.73                             | 1.33E-19                    | <b>7.91E-06</b>             | 8.70E-15                      | <b>0.000225</b>               |
| SpM1_ChORF1772_s_at   | <i>gatC</i>   | <i>spy1772</i>             | Protein synthesis     | tRNA synthetases                       | tRNA synthetase                        | -                                     | -                                         | 131.38                                | -46.39                                | -105.82                               | -76.34                             | 7.29E-21                    | <b>7.91E-06</b>             | 6.95E-09                      | <b>0.000225</b>               |
| SpM1_ChORF1025_at     | -             | <i>spy1025</i>             | Membrane transport    | Membrane transport                     | Unknown substrate membrane transport   | -                                     | -                                         | 131.31                                | 158.95                                | 96.01                                 | -87.16                             | 2.90E-13                    | <b>7.91E-06</b>             | 1.09E-10                      | <b>0.000225</b>               |
| SpM1_ChORF2063_s_at   | -             | <i>spy2063</i>             | Protein synthesis     | Ribosomal proteins                     | Ribosomal protein                      | -                                     | -                                         | 131.29                                | 925.61                                | 1558.04                               | 147.55                             | 2.69E-23                    | <b>7.91E-06</b>             | 0.1214017                     | 0.027903                      |
| SpM1_ChORF0864_s_at   | -             | <i>spy0864</i>             | Unknown               | Hypothetical Cytosolic Protein         | Unknown                                | -                                     | -                                         | 130.79                                | 81.93                                 | 26.66                                 | 131.89                             | 4.31E-05                    | <b>7.96E-06</b>             | 6.39E-08                      | <b>0.000225</b>               |
| SpM1_ChORF0737_at     | <i>epf</i>    | <i>spy0737</i>             | Virulence             | Virulence interacting proteins         | Cell surface protein                   | -                                     | -                                         | 130.55                                | 138.46                                | 131.30                                | 373.14                             | 1.13E-08                    | <b>7.91E-06</b>             | 1.28E-31                      | <b>0.000225</b>               |
| SpM1_ChORF1354_s_at   | <i>map</i>    | <i>spy1354</i>             | Protein synthesis     | Protein folding & modification         | Protein modification                   | -                                     | -                                         | 130.45                                | 113.28                                | 3.30                                  | 904.78                             | 0.0019378                   | <b>2.66E-05</b>             | 4.12E-45                      | <b>0.000225</b>               |
| SpM1_ChORF1358_s_at   | <i>murZ</i>   | <i>spy1358</i>             | Cell envelope         | Cell wall                              | Peptidoglycan biosynthesis             | -                                     | -                                         | 130.11                                | -36.28                                | 59.52                                 | 424.54                             | 2.92E-05                    | <b>7.91E-06</b>             | 2.42E-24                      | <b>0.000225</b>               |
| SpM1_ChORF0811_s_at   | -             | <i>spy0811</i>             | Unknown               | Hypothetical protein                   | Unknown                                | -                                     | -                                         | 129.93                                | 14.96                                 | 57.06                                 | -52.94                             | 6.12E-06                    | <b>7.91E-06</b>             | 0.0031703                     | 0.000992                      |
| SpM1_ChORF0115_s_at   | <i>pepA</i>   | <i>spy0115</i>             | Amino acid metabolism | Amino acid catabolism                  | Amino acid catabolism                  | -                                     | -                                         | 129.87                                | 32.05                                 | 16.14                                 | -258.08                            | 0.0001179                   | <b>8.35E-06</b>             | 4.48E-19                      | <b>0.000225</b>               |
| SpM1_ChORF1955_s_at   | <i>rpsO</i>   | <i>spy1955</i>             | Protein synthesis     | Ribosomal proteins                     | Ribosomal protein                      | -                                     | -                                         | 129.16                                | -56.05                                | -61.15                                | -67.31                             | 4.07E-13                    | <b>7.91E-06</b>             | 3.46E-05                      | <b>0.000225</b>               |
| SpM1_ChORF1410_s_at   | -             | <i>spy1410</i>             | Cell envelope         | Membrane lipids                        | Phospholipids biosynthesis             | -                                     | -                                         | 128.89                                | 47.11                                 | 70.79                                 | -6.40                              | 3.21E-09                    | <b>7.91E-06</b>             | 0.730076                      | 0.140125                      |
| SpM1_ChORF1942_s_at   | -             | <i>spy1942</i>             | Unknown               | Hypothetical protein                   | Unknown                                | -                                     | -                                         | 128.70                                | 20.00                                 | -52.21                                | -61.13                             | 1.28E-15                    | <b>7.91E-06</b>             | 6.53E-07                      | <b>0.000225</b>               |
| SpM1_ChORF1337_s_at   | <i>rsuA</i>   | <i>spy1337</i>             | RNA metabolism        | RNA modification                       | RNA modification                       | -                                     | -                                         | 127.56                                | -31.44                                | -45.28                                | -94.27                             | 2.07E-14                    | <b>7.91E-06</b>             | 1.97E-11                      | <b>0.000225</b>               |
| SpM1_ChORF1648_s_at   | <i>recU</i>   | <i>spy1648</i>             | DNA metabolism        | DNA replication, modification & repair | DNA replication, modification & repair | -                                     | -                                         | 127.43                                | 373.51                                | -20.18                                | 219.03                             | 7.24E-05                    | <b>8.10E-06</b>             | 0.0008598                     | <b>0.000363</b>               |
| SpM1_ChORF1712_s_at   | <i>lacR.1</i> | <i>spy1712</i>             | RNA metabolism        | Transcription regulation               |                                        | -                                     | -                                         | 127.37                                | 419.50                                | 352.70                                | 156.15                             | 6.60E-22                    | <b>7.91E-06</b>             | 2.32E-10                      | <b>0.000225</b>               |
| SpM1_ChORF1958_s_at   | <i>def</i>    | <i>spy1958</i>             | Protein synthesis     | Protein folding & modification         | Protein modification                   | -                                     | -                                         | 127.04                                | -19.62                                | -169.50                               | -75.06                             | 2.56E-19                    | <b>7.91E-06</b>             | 1.31E-05                      | <b>0.000225</b>               |
| SpM1_ChORF0764_s_at   | <i>epuA</i>   | <i>spy0764</i>             | Virulence             | Virulence interacting proteins         | Lantibiotic, Quorum sensing            | -                                     | -                                         | 126.79                                | 50.73                                 | 46.77                                 | -27.19                             | 1.24E-13                    | <b>7.91E-06</b>             | 0.0025292                     | 0.000813                      |
| SpM1_ChORF1363_s_at   | -             | <i>spy1363</i>             | Unknown               | Hypothetical protein                   | Unknown                                | -                                     | -                                         | 126.32                                | 13.47                                 | -44.05                                | -52.51                             | 4.80E-13                    | <b>7.91E-06</b>             | 2.55E-05                      | <b>0.000225</b>               |

| Probe Set Name*       | Gene Name   | Synonym                      | Category                | Subcategory                     | Function                             | <i>Bacillus subtilis</i> † | <i>Staphylococcus aureus</i> † | Difference Time (30 - 0)‡ | Difference Time (60 - 0)‡ | Difference Time (90 - 0)‡ | Difference (Mut - WT)‡ | P-value (Time)§ | Q-value (Time)§ | P-value (Strain)§ | Q-value (Strain)§ |
|-----------------------|-------------|------------------------------|-------------------------|---------------------------------|--------------------------------------|----------------------------|--------------------------------|---------------------------|---------------------------|---------------------------|------------------------|-----------------|-----------------|-------------------|-------------------|
| SpM18_ChORF0618_s_at  | -           | <i>spy0553</i>               | Unknown                 | Hypothetical protein            | Unknown                              | -                          | -                              | 125.37                    | 31.50                     | 5.89                      | -65.04                 | 1.60E-10        | <b>7.91E-06</b> | 7.33E-08          | <b>0.000225</b>   |
| SpM1_ChORF1675_s_at   | -           | <i>spy1675</i>               | Unknown                 | Hypothetical cytosolic Protein  | Unknown                              | -                          | -                              | 124.68                    | 121.23                    | 140.68                    | -103.35                | 2.60E-08        | <b>7.91E-06</b> | 5.34E-08          | <b>0.000225</b>   |
| SpM1_ChORF0385_s_at   | <i>thuD</i> | <i>spy0385</i>               | Membrane transport      | Membrane transport              | Metal ion membrane transport         | -                          | -                              | 124.57                    | -4.12                     | -28.91                    | -1.52                  | 6.88E-17        | <b>7.91E-06</b> | 0.8306504         | 0.156104          |
| SpM1_ChORF1329_s_at   | -           | <i>spy1329</i>               | Membrane transport      | Membrane transport              | Unknown substrate membrane transport | -                          | -                              | 124.39                    | 10.26                     | -3.77                     | -35.17                 | 2.74E-13        | <b>7.91E-06</b> | 3.39E-05          | <b>0.000225</b>   |
| SpM1_ChORF1529_s_at   | <i>glcK</i> | <i>spy1529</i>               | Carbohydrate metabolism | Carbohydrate central metabolism | Carbohydrate central metabolism      | -                          | -                              | 124.34                    | 633.98                    | 263.56                    | -66.13                 | 3.81E-16        | <b>7.91E-06</b> | 0.0426902         | 0.010755          |
| SpM12_ChORF205-1_s_at | -           | <i>spy0746</i>               | Unknown                 | Hypothetical protein            | Unknown                              | -                          | -                              | 122.49                    | 1532.54                   | 2602.03                   | 1734.22                | 1.48E-28        | <b>7.91E-06</b> | 1.42E-26          | <b>0.000225</b>   |
| SpM3_ChORF0884_s_at   | -           | <i>SpyM3_0884</i>            | Unknown                 | Hypothetical protein            | Unknown                              | -                          | -                              | 121.87                    | 93.48                     | -49.57                    | 261.28                 | 0.0001002       | <b>8.24E-06</b> | 5.92E-14          | <b>0.000225</b>   |
| SpM1_ChORF1016_s_at   | -           | <i>spy1016</i>               | Membrane transport      | Membrane transport              | Unknown substrate membrane transport | -                          | -                              | 121.40                    | 69.89                     | -6.56                     | -45.55                 | 8.02E-09        | <b>7.91E-06</b> | 0.0003949         | <b>0.000269</b>   |
| SpM18_ChORF0822_s_at  | -           | <i>spyM18_0822</i>           | Unknown                 | Hypothetical protein            | Unknown                              | -                          | -                              | 121.26                    | 47.12                     | 41.45                     | -27.71                 | 5.59E-09        | <b>7.91E-06</b> | 0.0220099         | 0.005954          |
| SpM1_ChORF2160_x_at   | <i>rpmG</i> | <i>spy2160</i>               | Protein synthesis       | Ribosomal proteins              | Ribosomal protein                    | -                          | -                              | 121.09                    | -802.64                   | -620.29                   | -230.15                | 1.70E-20        | <b>7.91E-06</b> | 0.0009205         | <b>0.000376</b>   |
| SpM12_ChORF299-65_at  | -           | <i>SpyM12_Chr ORF_299_65</i> | Unknown                 | Hypothetical protein            | Unknown                              | -                          | Essential                      | 120.51                    | 29.42                     | 25.42                     | -90.20                 | 1.12E-09        | <b>7.91E-06</b> | 6.50E-13          | <b>0.000225</b>   |
| SpM1_ChORF2182_s_at   | <i>holB</i> | <i>spy2182</i>               | DNA metabolism          | Basic replication machinery     | DNA replication                      | -                          | -                              | 120.46                    | -304.73                   | -558.19                   | -151.13                | 9.27E-21        | <b>7.91E-06</b> | 2.27E-05          | <b>0.000225</b>   |
| SpM1_ChORF0627_s_at   | <i>regR</i> | <i>spyM18_0692</i>           | RNA metabolism          | Transcription r egulation       |                                      | Essential                  | -                              | 120.10                    | 42.58                     | -13.83                    | -44.37                 | 5.88E-09        | <b>7.91E-06</b> | 0.0004577         | <b>0.000281</b>   |
| SpM1_ChORF0840_s_at   | <i>rpsP</i> | <i>spy0840</i>               | Protein synthesis       | Ribosomal proteins              | Ribosomal protein                    | -                          | -                              | 119.11                    | -94.50                    | -9.84                     | -35.08                 | 0.0001299       | <b>8.41E-06</b> | 0.5233753         | 0.105295          |
| SpM1_ChORF0196_s_at   | -           | <i>spy0196</i>               | Membrane transport      | Membrane transport              | Unknown substrate membrane transport | -                          | -                              | 119.08                    | 122.64                    | 101.79                    | -60.80                 | 1.56E-19        | <b>7.91E-06</b> | 2.80E-06          | <b>0.000225</b>   |
| SpM1_ChORF0287_s_at   | -           | <i>spy0287</i>               | Cofactors               | Fe-sulfate cluster              | Fe-sulfate cluster biosynthesis      | -                          | -                              | 119.07                    | -261.88                   | -387.82                   | -68.72                 | 2.32E-15        | <b>7.91E-06</b> | 0.0311636         | 0.008149          |
| SpM1_ChORF0227_s_at   | -           | <i>spy0227</i>               | Unknown                 | Hypothetical cytosolic protein  | Unknown                              | -                          | -                              | 119.03                    | 31.64                     | 19.86                     | 122.79                 | 7.65E-08        | <b>7.91E-06</b> | 3.23E-14          | <b>0.000225</b>   |
| SpM1_ChORF0720_s_at   | -           | <i>spy0720</i>               | Unknown                 | Hypothetical protein            | Unknown                              | Essential                  | -                              | 118.74                    | 159.99                    | 133.41                    | 22.87                  | 1.81E-05        | <b>7.91E-06</b> | 0.2834882         | 0.060379          |
| SpM18_ChORF2197_x_at  | <i>rpmG</i> | <i>spyM18_2197</i>           | Protein synthesis       | Ribosomal proteins              | Ribosomal protein                    | Essential                  | Essential                      | 118.63                    | -830.49                   | -664.50                   | -251.21                | 9.35E-24        | <b>7.91E-06</b> | 9.42E-05          | <b>0.000226</b>   |
| SpM1_ChORF2107_s_at   | -           | <i>spy2107</i>               | Unknown                 | Hypothetical cytosolic Protein  | Unknown                              | -                          | -                              | 118.54                    | 302.15                    | 470.90                    | -984.74                | 1.03E-09        | <b>7.91E-06</b> | 8.61E-32          | <b>0.000225</b>   |
| SpM1_ChORF1240_s_at   | <i>phoU</i> | <i>spy1240</i>               | RNA metabolism          | Transcription r egulation       |                                      | -                          | -                              | 118.52                    | 53.96                     | -222.26                   | 309.58                 | 5.44E-11        | <b>7.91E-06</b> | 8.29E-14          | <b>0.000225</b>   |

| Probe Set Name*      | Gene Name    | Synonym                      | Category              | Subcategory                    | Function                             | <i>Bacillus subtilis</i> <sup>†</sup> | <i>Staphylococcus aureus</i> <sup>†</sup> | Difference Time (30 - 0) <sup>‡</sup> | Difference Time (60 - 0) <sup>‡</sup> | Difference Time (90 - 0) <sup>‡</sup> | Difference (Mut - WT) <sup>‡</sup> | P-value (Time) <sup>§</sup> | Q-value (Time) <sup>§</sup> | P-value (Strain) <sup>§</sup> | Q-value (Strain) <sup>§</sup> |
|----------------------|--------------|------------------------------|-----------------------|--------------------------------|--------------------------------------|---------------------------------------|-------------------------------------------|---------------------------------------|---------------------------------------|---------------------------------------|------------------------------------|-----------------------------|-----------------------------|-------------------------------|-------------------------------|
| SpM12_ChORF251-7_at  | -            | <i>SpyoM12_Chr ORF_251_7</i> | Unknown               | Hypothetical protein           | Unknown                              | Essential                             | Essential                                 | 118.07                                | 41.84                                 | 43.61                                 | -84.73                             | 8.09E-10                    | <b>7.91E-06</b>             | 1.17E-11                      | <b>0.000225</b>               |
| SpM1_ChORF1216_s_at  | -            | <i>spy1216</i>               | Unknown               | Hypothetical protein           | Unknown                              | -                                     | -                                         | 117.97                                | 662.68                                | 557.66                                | 17.30                              | 1.42E-17                    | <b>7.91E-06</b>             | 0.7200498                     | 0.138655                      |
| SpM1_ChORF1114_s_at  | -            | <i>spy1114</i>               | Membrane transport    | Membrane transport             | Unknown substrate membrane transport | -                                     | -                                         | 117.80                                | -61.47                                | -108.48                               | -43.02                             | 1.25E-22                    | <b>7.91E-06</b>             | 4.07E-05                      | <b>0.000225</b>               |
| SpM1_ChORF1104_s_at  | <i>potC</i>  | <i>spy1104</i>               | Membrane transport    | Membrane transport             | Polyamine membrane transport         | Essential                             | Essential                                 | 117.51                                | 48.77                                 | 71.62                                 | -74.83                             | 9.87E-07                    | <b>7.91E-06</b>             | 7.09E-06                      | <b>0.000225</b>               |
| SpM1_ChORF0166_s_at  | -            | <i>spy0166</i>               | Unknown               | Hypothetical cytosolic protein | Unknown                              | -                                     | -                                         | 117.23                                | 84.70                                 | -299.27                               | -1.92                              | 1.38E-05                    | <b>7.91E-06</b>             | 0.7613806                     | 0.145025                      |
| SpM1_ChORF1125_s_at  | -            | <i>spy1125</i>               | Stress adaptation     | Phosphorus metabolism          | PpGpp metabolism                     | -                                     | -                                         | 116.64                                | -36.62                                | -101.86                               | -82.57                             | 6.84E-14                    | <b>7.91E-06</b>             | 1.09E-07                      | <b>0.000225</b>               |
| SpM18_ChORF1077_s_at | -            | <i>spyM18_1077</i>           | Cell envelope         | Cell wall                      | Peptidoglycan biosynthesis           | -                                     | -                                         | 115.24                                | -25.17                                | -15.93                                | -30.26                             | 9.10E-19                    | <b>7.91E-06</b>             | 7.31E-06                      | <b>0.000225</b>               |
| SpM1_ChORF2209_s_at  | -            | <i>spy2209</i>               | Membrane transport    | Membrane transport             | Unknown substrate membrane transport | Essential                             | Essential                                 | 114.75                                | -26.98                                | -39.85                                | -64.98                             | 8.54E-19                    | <b>7.91E-06</b>             | 1.25E-11                      | <b>0.000225</b>               |
| SpM18_ChORF1197_s_at | -            | <i>spyM18_1197</i>           | Unknown               | Hypothetical protein           | Unknown                              | -                                     | -                                         | 114.68                                | 71.57                                 | -55.82                                | 201.37                             | 2.45E-05                    | <b>7.91E-06</b>             | 1.39E-11                      | <b>0.000225</b>               |
| SpM1_ChORF0007_s_at  | <i>pth</i>   | <i>spy0007</i>               | Protein synthesis     | Translation factors            | Translation factor                   | -                                     | -                                         | 114.55                                | 0.27                                  | -54.75                                | -68.32                             | 2.47E-13                    | <b>7.91E-06</b>             | 8.36E-08                      | <b>0.000225</b>               |
| SpM18_ChORF2122_s_at | -            | <i>spyM18_2122</i>           | Unknown               | Hypothetical protein           | Unknown                              | -                                     | -                                         | 113.68                                | 1146.76                               | 2014.23                               | 259.47                             | 2.92E-21                    | <b>7.91E-06</b>             | 0.0453872                     | 0.011406                      |
| SpM1_ChORF0801_s_at  | -            | <i>spy0801</i>               | Unknown               | Hypothetical protein           | Unknown                              | -                                     | -                                         | 113.67                                | 0.83                                  | -0.27                                 | -30.29                             | 4.32E-16                    | <b>7.91E-06</b>             | 1.02E-08                      | <b>0.000225</b>               |
| SpM1_ChORF0245_s_at  | <i>fasA</i>  | <i>spy0245</i>               | RNA metabolism        | Transcription regulation       | Signal transduction                  | -                                     | -                                         | 113.27                                | 16.15                                 | -3.18                                 | -86.14                             | 3.88E-09                    | <b>7.91E-06</b>             | 1.21E-09                      | <b>0.000225</b>               |
| SpM1_ChORF0616_s_at  | <i>murM</i>  | <i>spy0616</i>               | Cell envelope         | Cell wall                      | Peptidoglycan biosynthesis           | Essential                             | -                                         | 113.24                                | -68.54                                | -314.91                               | -116.33                            | 7.46E-17                    | <b>7.91E-06</b>             | 1.24E-05                      | <b>0.000225</b>               |
| SpM1_ChORF1244_s_at  | <i>pstC2</i> | <i>spy1244</i>               | Membrane transport    | Membrane transport             | Ion membrane transport               | -                                     | -                                         | 112.70                                | -9.24                                 | -128.08                               | 190.89                             | 4.00E-19                    | <b>7.91E-06</b>             | 4.07E-22                      | <b>0.000225</b>               |
| SpM1_ChORF1210_s_at  | -            | <i>spy1210</i>               | Amino acid metabolism | Amino acid catabolism          | Amino acid catabolism                | -                                     | -                                         | 112.40                                | 23.21                                 | 9.72                                  | -14.95                             | 2.62E-11                    | <b>7.91E-06</b>             | 0.0462197                     | 0.011586                      |
| SpM1_ChORF0726_s_at  | -            | <i>spy0726</i>               | Unknown               | Hypothetical protein           | Unknown                              | -                                     | -                                         | 112.16                                | -37.24                                | 32.32                                 | -0.07                              | 0.0044276                   | <b>5.85E-05</b>             | 0.8416047                     | 0.157657                      |
| SpM1_ChORF1391_s_at  | -            | <i>spy1391</i>               | Unknown               | Hypothetical protein           | Unknown                              | -                                     | -                                         | 112.00                                | -87.02                                | -87.56                                | -60.11                             | 3.24E-22                    | <b>7.91E-06</b>             | 9.92E-08                      | <b>0.000225</b>               |
| SpM1_ChORF0100_s_at  | -            | <i>spy0100</i>               | Unknown               | Hypothetical protein           | Unknown                              | -                                     | -                                         | 111.96                                | -429.09                               | -455.05                               | -250.45                            | 2.74E-14                    | <b>7.91E-06</b>             | 3.76E-07                      | <b>0.000225</b>               |
| SpM1_ChORF1217_s_at  | -            | <i>spy1217</i>               | Unknown               | Hypothetical protein           | Unknown                              | -                                     | -                                         | 111.93                                | 655.92                                | 459.35                                | 103.75                             | 1.45E-12                    | <b>7.91E-06</b>             | 0.030708                      | 0.008052                      |
| SpM1_ChORF0095_s_at  | -            | <i>spy0095</i>               | Virulence             | Virulence interacting proteins | Cell surface protein                 | -                                     | -                                         | 111.83                                | 6.16                                  | -37.74                                | -65.24                             | 1.53E-14                    | <b>7.91E-06</b>             | 2.46E-08                      | <b>0.000225</b>               |
| SpM1_ChORF0601_s_at  | -            | <i>spy0601</i>               | Unknown               | Hypothetical protein           | Unknown                              | -                                     | -                                         | 111.59                                | -71.55                                | -72.57                                | 233.04                             | 7.37E-07                    | <b>7.91E-06</b>             | 6.45E-16                      | <b>0.000225</b>               |
| SpM1_ChORF1233_s_at  | <i>coaA</i>  | <i>spy1233</i>               | Cofactors             | CoA                            | CoA biosynthesis                     | -                                     | -                                         | 111.36                                | -15.10                                | -16.60                                | -13.40                             | 1.29E-18                    | <b>7.91E-06</b>             | 0.0099988                     | 0.002861                      |
| SpM1_ChORF0294_s_at  | <i>oppB</i>  | <i>spy0294</i>               | Membrane transport    | Membrane transport             | Peptide membrane transport           | -                                     | -                                         | 111.31                                | 454.24                                | 404.21                                | 297.45                             | 1.49E-13                    | <b>7.91E-06</b>             | 1.33E-10                      | <b>0.000225</b>               |

| Probe Set Name*         | Gene Name    | Synonym                              | Category              | Subcategory                    | Function                        | <i>Bacillus subtilis</i> † | <i>Staphylococcus aureus</i> † | Difference Time (30 - 0)‡ | Difference Time (60 - 0)‡ | Difference Time (90 - 0)‡ | Difference (Mut - WT)‡ | P-value (Time)§ | Q-value (Time)§ | P-value (Strain)§ | Q-value (Strain)§ |
|-------------------------|--------------|--------------------------------------|-----------------------|--------------------------------|---------------------------------|----------------------------|--------------------------------|---------------------------|---------------------------|---------------------------|------------------------|-----------------|-----------------|-------------------|-------------------|
| SpM1_ChORF0164_s_at     | <i>nusG</i>  | <i>spy0164</i>                       | RNA metabolism        | Basic transcription machinery  | Basic transcription machinery   | -                          | -                              | 110.32                    | 37.92                     | 242.05                    | -73.30                 | 1.95E-11        | <b>7.91E-06</b> | 0.0069929         | 0.002062          |
| SpM18_ChORF0930_s_at    | <i>rpl35</i> | <i>spyM18_0930</i>                   | Protein synthesis     | Ribosomal proteins             | Ribosomal protein               | -                          | -                              | 109.65                    | 0.98                      | -1.52                     | 88.68                  | 1.47E-08        | <b>7.91E-06</b> | 7.06E-10          | <b>0.000225</b>   |
| SpM1_ChORF2193_s_at     | -            | <i>spy2193</i>                       | Membrane transport    | Membrane transport             | Metal ion membrane transport    | -                          | -                              | 109.28                    | 23.26                     | -5.88                     | -106.77                | 1.19E-08        | <b>7.91E-06</b> | 2.26E-12          | <b>0.000225</b>   |
| SpM1_ChORF0567_s_at     | -            | <i>spy0567</i>                       | Unknown               | Hypothetical protein           | Unknown                         | -                          | -                              | 109.15                    | 223.64                    | 40.26                     | 30.39                  | 1.01E-09        | <b>7.91E-06</b> | 0.2524377         | 0.054443          |
| SpM1_ChORF0326_s_at     | -            | <i>spy0326</i>                       | Membrane transport    | Membrane transport             | Metal ion membrane transport    | Essential                  | -                              | 109.14                    | -2.30                     | -93.98                    | -99.19                 | 7.16E-15        | <b>7.91E-06</b> | 6.23E-10          | <b>0.000225</b>   |
| SpM1_ChORF0386_s_at     | <i>fhuA</i>  | <i>spy0386</i>                       | Membrane transport    | Membrane transport             | Metal ion membrane transport    | -                          | -                              | 107.95                    | 0.53                      | 15.71                     | -1.46                  | 4.45E-19        | <b>7.91E-06</b> | 0.5944688         | 0.117631          |
| SpM1_ChORF1965_s_at     | <i>uppS</i>  | <i>spy1965</i>                       | Stress adaptation     | Protein Metabolism             | Protein Metabolism              | -                          | -                              | 107.60                    | -26.18                    | -102.73                   | 54.07                  | 2.34E-06        | <b>7.91E-06</b> | 0.0805554         | 0.019193          |
| SpM1_ChORF1539_s_at     | <i>asnA</i>  | <i>spy1539</i>                       | Amino acid metabolism | Amino acid biosynthesis        | Amino acid biosynthesis         | -                          | -                              | 107.45                    | -8.75                     | -77.89                    | 232.91                 | 2.15E-10        | <b>7.91E-06</b> | 1.61E-21          | <b>0.000225</b>   |
| SpM1_ChORF0228_s_at     | -            | <i>spy0228</i>                       | RNA metabolism        | Transcription r egulation      | Transcription r egulation       | -                          | -                              | 107.15                    | 65.46                     | 83.04                     | 203.44                 | 3.25E-07        | <b>7.91E-06</b> | 8.14E-23          | <b>0.000225</b>   |
| SpM1_ChORF1107_s_at     | -            | <i>spy1107</i>                       | RNA metabolism        | Transcription r egulation      | Signal transduction             | -                          | -                              | 107.07                    | 35.09                     | 18.09                     | 6.30                   | 1.89E-10        | <b>7.91E-06</b> | 0.7464858         | 0.142729          |
| SpM1_ChORF1037_s_at     | -            | <i>spy1037</i>                       | Unknown               | Hypothetical protein           | Unknown                         | -                          | -                              | 106.97                    | 124.79                    | -4.28                     | -12.39                 | 4.18E-14        | <b>7.91E-06</b> | 0.1200769         | 0.027635          |
| SpM1_ChORF0806_s_at     | <i>rplT</i>  | <i>spy0806</i>                       | Protein synthesis     | Ribosomal proteins             | Ribosomal protein               | -                          | -                              | 106.78                    | -37.92                    | -27.63                    | -70.59                 | 6.85E-06        | <b>7.91E-06</b> | 0.0008371         | <b>0.000357</b>   |
| SpM1_ChORF1926_s_at     | -            | <i>spy1926</i>                       | Unknown               | Hypothetical cytosolic Protein | Unknown                         | -                          | -                              | 106.26                    | 20.42                     | -0.02                     | -44.36                 | 2.90E-09        | <b>7.91E-06</b> | 1.25E-05          | <b>0.000225</b>   |
| SpM18_ChORF0444_x_at    | -            | <i>spyM18_0444</i>                   | Phage                 | Phage proteins                 |                                 | -                          | -                              | 106.23                    | -101.35                   | -132.80                   | -73.17                 | 1.83E-16        | <b>7.91E-06</b> | 1.90E-05          | <b>0.000225</b>   |
| SpM1_ChORF1295_s_at     | <i>malF</i>  | <i>spy1295</i>                       | Membrane transport    | Membrane transport             | Carbohydrate membrane transport | -                          | -                              | 106.16                    | 476.99                    | 264.27                    | 57.00                  | 6.92E-16        | <b>7.91E-06</b> | 0.0426316         | 0.010747          |
| SpM1_ChORF1588_s_at     | <i>lytS</i>  | <i>spy1588</i>                       | RNA metabolism        | Transcription r egulation      | Signal transduction             | -                          | -                              | 106.07                    | 75.77                     | 84.70                     | 77.51                  | 6.19E-09        | <b>7.91E-06</b> | 2.36E-07          | <b>0.000225</b>   |
| SpM1_ChORF0527_s_at     | -            | <i>spy0527</i>                       | Unknown               | Hypothetical Cytosolic Protein | Unknown                         | -                          | -                              | 105.98                    | 9.34                      | -20.64                    | -17.87                 | 1.27E-08        | <b>7.91E-06</b> | 0.1453096         | 0.032777          |
| SpM5_ChORF270b-541_x_at | -            | <i>SpyoM5_Chr ORF_270b10.p1t_541</i> | Unknown               | Hypothetical protein           | Unknown                         | -                          | -                              | 105.85                    | 78.16                     | 43.45                     | -62.77                 | 3.25E-09        | <b>7.91E-06</b> | 7.80E-08          | <b>0.000225</b>   |
| SpM1_ChORF0393_x_at     | -            | <i>spy0393</i>                       | Unknown               | Hypothetical protein           | Unknown                         | -                          | -                              | 105.67                    | -100.08                   | -129.97                   | -72.00                 | 6.47E-15        | <b>7.91E-06</b> | 6.35E-05          | <b>0.000225</b>   |
| SpM1_ChORF1516_s_at     | -            | <i>spy1516</i>                       | Unknown               | Hypothetical protein           | Unknown                         | -                          | -                              | 105.51                    | 24.96                     | -121.14                   | -66.77                 | 2.28E-17        | <b>7.91E-06</b> | 1.46E-06          | <b>0.000225</b>   |
| SpM12_ChORF299-66_at    | -            | <i>SpyoM12_Chr ORF_299_66</i>        | Unknown               | Hypothetical protein           | Unknown                         | -                          | Essential                      | 105.29                    | 33.77                     | 40.21                     | -104.51                | 4.10E-08        | <b>7.91E-06</b> | 3.79E-15          | <b>0.000225</b>   |
| SpM1_ChORF1103_s_at     | <i>potB</i>  | <i>spy1103</i>                       | Membrane transport    | Membrane transport             | Polyamine membrane transport    | -                          | -                              | 104.77                    | 10.65                     | 19.66                     | -69.26                 | 1.03E-08        | <b>7.91E-06</b> | 4.20E-07          | <b>0.000225</b>   |
| SpM1_ChORF1421_s_at     | <i>ddlA</i>  | <i>spy1421</i>                       | Cell envelope         | Cell wall                      | Peptidoglycan biosynthesis      | -                          | -                              | 104.28                    | -20.43                    | -48.40                    | 9.29                   | 3.83E-16        | <b>7.91E-06</b> | 0.571331          | 0.113629          |

| Probe Set Name*        | Gene Name     | Synonym                       | Category                | Subcategory                    | Function                           | <i>Bacillus subtilis</i> <sup>†</sup> | <i>Staphylococcus aureus</i> <sup>†</sup> | Difference Time (30 - 0) <sup>‡</sup> | Difference Time (60 - 0) <sup>‡</sup> | Difference Time (90 - 0) <sup>‡</sup> | Difference (Mut - WT) <sup>‡</sup> | P-value (Time) <sup>§</sup> | Q-value (Time) <sup>§</sup> | P-value (Strain) <sup>§</sup> | Q-value (Strain) <sup>§</sup> |
|------------------------|---------------|-------------------------------|-------------------------|--------------------------------|------------------------------------|---------------------------------------|-------------------------------------------|---------------------------------------|---------------------------------------|---------------------------------------|------------------------------------|-----------------------------|-----------------------------|-------------------------------|-------------------------------|
| SpM1_ChORF0771_s_at    | -             | <i>spy0771</i>                | Unknown                 | Hypothetical Cytosolic Protein | Unknown                            | -                                     | -                                         | 104.04                                | 78.60                                 | 22.51                                 | -10.59                             | 1.04E-09                    | <b>7.91E-06</b>             | 0.2798118                     | 0.059726                      |
| SpM1_ChORF1623_s_at    | -             | <i>spy1623</i>                | Unknown                 | Hypothetical membrane protein  | Unknown                            | -                                     | -                                         | 104.01                                | 44.19                                 | -12.09                                | -27.07                             | 9.09E-12                    | <b>7.91E-06</b>             | 0.0039758                     | 0.001221                      |
| SpM1_ChORF0745_s_at    | <i>sagH</i>   | <i>spy0745</i>                | Membrane transport      | Membrane transport             | Drug, cytolysin membrane transport | Essential                             | -                                         | 103.95                                | 1298.33                               | 2085.23                               | 1429.08                            | 3.44E-29                    | <b>7.91E-06</b>             | 1.20E-27                      | <b>0.000225</b>               |
| SpM12_ChORF262-15_s_at | -             | <i>SpyoM12_Chr ORF_262_15</i> | Unknown                 | Hypothetical protein           | Unknown                            | Essential                             | Essential                                 | 103.05                                | 917.45                                | 1454.57                               | 950.70                             | 5.51E-28                    | <b>7.91E-06</b>             | 1.35E-25                      | <b>0.000225</b>               |
| SpM1_ChORF0023_s_at    | <i>acpP.2</i> | <i>spy0023</i>                | Cell envelope           | Membrane lipids                | Fatty acid biosynthesis            | Essential                             | -                                         | 102.99                                | 12.57                                 | -74.04                                | -58.99                             | 1.64E-15                    | <b>7.91E-06</b>             | 1.48E-06                      | <b>0.000225</b>               |
| SpM18_ChORF1620_x_at   | -             | <i>spyM18_1620</i>            | Unknown                 | Hypothetical protein           | Unknown                            | -                                     | -                                         | 102.87                                | -19.37                                | -9.01                                 | -28.35                             | 2.46E-17                    | <b>7.91E-06</b>             | 1.48E-05                      | <b>0.000225</b>               |
| SpM1_ChORF1587_s_at    | <i>lytR</i>   | <i>spy1587</i>                | RNA metabolism          | Transcription r egulation      | Signal transduction                | -                                     | -                                         | 102.87                                | 181.36                                | 213.80                                | 148.52                             | 1.93E-14                    | <b>7.91E-06</b>             | 2.64E-12                      | <b>0.000225</b>               |
| SpM1_ChORF0021_s_at    | -             | <i>spy0021</i>                | Unknown                 | Conserved protein              | Unknown                            | -                                     | -                                         | 102.73                                | -10.26                                | -61.68                                | -3.32                              | 8.83E-15                    | <b>7.91E-06</b>             | 0.5598267                     | 0.111657                      |
| SpM1_ChORF1665_s_at    | <i>pbpX</i>   | <i>spy1664</i>                | Cell shape and division | Cell shape & division          | Cell division                      | -                                     | -                                         | 102.30                                | -24.68                                | -36.44                                | -50.56                             | 8.91E-10                    | <b>7.91E-06</b>             | 0.0001271                     | <b>0.000229</b>               |
| SpM1_ChORF1656_s_at    | <i>aapA</i>   | <i>spy1654</i>                | Membrane transport      | Membrane transport             | Amino acid membrane transport      | -                                     | -                                         | 102.16                                | -11.56                                | -44.84                                | -35.08                             | 1.18E-12                    | <b>7.91E-06</b>             | 0.0005643                     | <b>0.0003</b>                 |
| SpM1_ChORF1248_s_at    | -             | <i>spy1248</i>                | Unknown                 | Hypothetical Cytosolic Protein | Unknown                            | -                                     | -                                         | 101.77                                | 95.07                                 | -56.93                                | 234.99                             | 0.0002013                   | <b>8.87E-06</b>             | 1.95E-12                      | <b>0.000225</b>               |
| SpM1_ChORF0542_s_at    | -             | <i>spy0542</i>                | RNA metabolism          | Transcription r egulation      | Unknown                            | -                                     | -                                         | 101.62                                | 54.70                                 | 18.88                                 | -67.73                             | 2.98E-08                    | <b>7.91E-06</b>             | 2.53E-08                      | <b>0.000225</b>               |
| SpM1_ChORF1297_at      | -             | <i>spy1297</i>                | RNA metabolism          | Transcription r egulation      | Unknown                            | -                                     | -                                         | 101.58                                | 454.55                                | 410.89                                | 122.29                             | 1.32E-26                    | <b>7.91E-06</b>             | 1.25E-08                      | <b>0.000225</b>               |
| SpM3_ChORF0584_s_at    | -             | <i>SpyM3_0584</i>             | Unknown                 | Hypothetical protein           | Unknown                            | -                                     | -                                         | 101.54                                | 277.66                                | 198.29                                | 122.13                             | 3.27E-13                    | <b>7.91E-06</b>             | 3.24E-08                      | <b>0.000225</b>               |
| SpM1_ChORF1011_s_at    | -             | <i>spy1011</i>                | Unknown                 | Hypothetical protein           | Unknown                            | -                                     | -                                         | 101.12                                | 150.67                                | -13.32                                | -32.96                             | 3.36E-12                    | <b>7.91E-06</b>             | 0.0011403                     | <b>0.00043</b>                |
| SpM1_ChORF1353_s_at    | -             | <i>spy1353</i>                | RNA metabolism          | RNA modification               | RNA modification                   | Essential                             | Essential                                 | 100.86                                | 96.30                                 | 44.37                                 | 574.84                             | 8.87E-05                    | <b>8.18E-06</b>             | 6.58E-46                      | <b>0.000225</b>               |
| SpM1_ChORF0307_s_at    | -             | <i>spy0307</i>                | Unknown                 | Conserved protein              | Unknown                            | -                                     | -                                         | 100.18                                | -30.57                                | -71.78                                | -63.41                             | 2.21E-19                    | <b>7.91E-06</b>             | 1.07E-10                      | <b>0.000225</b>               |
| SpM1_ChORF0016_s_at    | -             | <i>spy0016</i>                | Membrane transport      | Membrane transport             | Amino acid membrane transport      | -                                     | -                                         | 99.82                                 | -24.95                                | -63.32                                | -28.84                             | 3.77E-13                    | <b>7.91E-06</b>             | 0.0053273                     | 0.0016                        |
| SpM1_ChORF0004_s_at    | -             | <i>spy0004</i>                | Unknown                 | Hypothetical cytosolic protein | Unknown                            | -                                     | -                                         | 99.61                                 | -17.82                                | -77.25                                | -23.06                             | 7.85E-18                    | <b>7.91E-06</b>             | 0.0102821                     | 0.002935                      |
| SpM12_ChORF299-62_at   | -             | <i>SpyoM12_Chr ORF_299_62</i> | Unknown                 | Hypothetical protein           | Unknown                            | -                                     | -                                         | 99.47                                 | 12.42                                 | 8.23                                  | -75.76                             | 1.26E-10                    | <b>7.91E-06</b>             | 1.70E-15                      | <b>0.000225</b>               |
| SpM1_ChORF0384_s_at    | <i>fhuB.1</i> | <i>spy0384</i>                | Membrane transport      | Membrane transport             | Metal ion membrane transport       | -                                     | -                                         | 99.16                                 | -3.52                                 | -43.54                                | -4.15                              | 1.43E-13                    | <b>7.91E-06</b>             | 0.7057531                     | 0.136276                      |
| SpM1_ChORF1155_s_at    | -             | <i>spy1155</i>                | Unknown                 | Hypothetical protein           | Unknown                            | -                                     | -                                         | 98.86                                 | 32.46                                 | -26.86                                | -70.17                             | 1.80E-11                    | <b>7.91E-06</b>             | 4.03E-09                      | <b>0.000225</b>               |
| SpM3_ChORF0589_s_at    | -             | <i>SpyM3_0589</i>             | Unknown                 | Hypothetical protein           | Unknown                            | -                                     | -                                         | 98.75                                 | -5.14                                 | -2.05                                 | 90.14                              | 1.21E-07                    | <b>7.91E-06</b>             | 3.86E-10                      | <b>0.000225</b>               |

| Probe Set Name*     | Gene Name   | Synonym        | Category                | Subcategory                    | Function                             | <i>Bacillus subtilis</i> <sup>†</sup> | <i>Staphylococcus aureus</i> <sup>†</sup> | Difference Time (30 - 0) <sup>‡</sup> | Difference Time (60 - 0) <sup>‡</sup> | Difference Time (90 - 0) <sup>‡</sup> | Difference (Mut - WT) <sup>‡</sup> | P-value (Time) <sup>§</sup> | Q-value (Time) <sup>§</sup> | P-value (Strain) <sup>§</sup> | Q-value (Strain) <sup>§</sup> |
|---------------------|-------------|----------------|-------------------------|--------------------------------|--------------------------------------|---------------------------------------|-------------------------------------------|---------------------------------------|---------------------------------------|---------------------------------------|------------------------------------|-----------------------------|-----------------------------|-------------------------------|-------------------------------|
| SpM1_ChORF0865_s_at | -           | <i>spy0865</i> | Unknown                 | Hypothetical protein           | Unknown                              | -                                     | -                                         | 98.69                                 | 41.51                                 | 49.04                                 | 160.14                             | 0.0081669                   | <b>0.000106</b>             | 2.26E-10                      | <b>0.000225</b>               |
| SpM1_ChORF0627_at   | <i>regR</i> | <i>spy0627</i> | RNA metabolism          | Transcription regulation       |                                      | Essential                             | Essential                                 | 98.44                                 | 5.67                                  | -44.55                                | -41.84                             | 4.73E-09                    | <b>7.91E-06</b>             | 0.0010385                     | <b>0.000405</b>               |
| SpM1_ChORF0373_s_at | -           | <i>spy0373</i> | Membrane transport      | Membrane transport             | Unknown substrate membrane transport | -                                     | -                                         | 98.10                                 | -11.22                                | -44.91                                | 30.33                              | 3.12E-09                    | <b>7.91E-06</b>             | 0.0245717                     | 0.006592                      |
| SpM1_ChORF1427_s_at | -           | <i>spy1427</i> | RNA metabolism          | Transcription regulation       |                                      | -                                     | -                                         | 97.76                                 | 67.41                                 | 42.64                                 | 39.65                              | 0.0035586                   | <b>4.72E-05</b>             | 0.0203585                     | 0.005555                      |
| SpM1_ChORF1064_at   | -           | <i>spy1064</i> | Unknown                 | Hypothetical protein           | Unknown                              | -                                     | -                                         | 97.30                                 | -0.12                                 | -30.16                                | -71.26                             | 2.91E-13                    | <b>7.91E-06</b>             | 6.53E-12                      | <b>0.000225</b>               |
| SpM1_ChORF0770_s_at | -           | <i>spy0770</i> | Unknown                 | Hypothetical Cytosolic Protein | Unknown                              | -                                     | -                                         | 97.23                                 | 51.53                                 | -14.24                                | -7.70                              | 3.08E-11                    | <b>7.91E-06</b>             | 0.3250548                     | 0.068485                      |
| SpM1_ChORF0207_s_at | -           | <i>spy0207</i> | Unknown                 | Hypothetical protein           | Unknown                              | -                                     | -                                         | 97.17                                 | -6.71                                 | 6.96                                  | -45.89                             | 6.11E-08                    | <b>7.91E-06</b>             | 0.0001962                     | <b>0.000236</b>               |
| SpM1_ChORF2153_s_at | -           | <i>spy2153</i> | Unknown                 | Hypothetical membrane protein  | Unknown                              | -                                     | -                                         | 97.15                                 | 125.29                                | 80.93                                 | -151.77                            | 1.35E-07                    | <b>7.91E-06</b>             | 3.82E-16                      | <b>0.000225</b>               |
| SpM1_ChORF0742_s_at | <i>sagE</i> | <i>spy0742</i> | Protein synthesis       | Protein folding & modification | Protein modification                 | -                                     | -                                         | 96.69                                 | 675.43                                | 1032.90                               | 683.96                             | 6.03E-28                    | <b>7.91E-06</b>             | 7.30E-26                      | <b>0.000225</b>               |
| SpM1_ChORF1530_s_at | -           | <i>spy1530</i> | Unknown                 | Hypothetical cytosolic Protein | Unknown                              | -                                     | -                                         | 96.44                                 | 142.81                                | 14.66                                 | -15.76                             | 5.15E-10                    | <b>7.91E-06</b>             | 0.123618                      | 0.028357                      |
| SpM1_ChORF0306_s_at | -           | <i>spy0306</i> | Other                   | GTP-binding protein            | GTP-binding                          | -                                     | -                                         | 96.11                                 | -40.65                                | -75.84                                | -62.55                             | 8.38E-19                    | <b>7.91E-06</b>             | 3.63E-10                      | <b>0.000225</b>               |
| SpM1_ChORF0233_s_at | -           | <i>spy0233</i> | Unknown                 | Hypothetical cytosolic protein | Unknown                              | -                                     | Essential                                 | 95.78                                 | 22.12                                 | -2.01                                 | 47.63                              | 7.95E-08                    | <b>7.91E-06</b>             | 7.50E-05                      | <b>0.000225</b>               |
| SpM1_ChORF0069_s_at | <i>rpsE</i> | <i>spy0069</i> | Protein synthesis       | Ribosomal proteins             | Ribosomal protein                    | -                                     | -                                         | 95.34                                 | 171.01                                | -103.74                               | -36.72                             | 0.2097396                   | 0.002463                    | 0.7222889                     | 0.138934                      |
| SpM1_ChORF0308_s_at | <i>nadD</i> | <i>spy0308</i> | Cofactors               | NAD                            | NAD biosynthesis                     | -                                     | -                                         | 94.89                                 | -71.91                                | -77.37                                | -86.65                             | 5.27E-26                    | <b>7.91E-06</b>             | 2.86E-18                      | <b>0.000225</b>               |
| SpM1_ChORF1927_s_at | -           | <i>spy1927</i> | Unknown                 | Hypothetical cytosolic Protein | Unknown                              | -                                     | -                                         | 94.78                                 | 23.34                                 | 1.10                                  | -46.75                             | 1.45E-08                    | <b>7.91E-06</b>             | 3.98E-06                      | <b>0.000225</b>               |
| SpM1_ChORF0729_s_at | -           | <i>spy0729</i> | Unknown                 | Hypothetical protein           | Unknown                              | -                                     | -                                         | 94.66                                 | -33.50                                | -24.52                                | -7.37                              | 3.67E-19                    | <b>7.91E-06</b>             | 0.1055946                     | 0.024532                      |
| SpM1_ChORF2211_s_at | -           | <i>spy2211</i> | Unknown                 | Hypothetical membrane protein  | Unknown                              | -                                     | -                                         | 94.47                                 | 75.07                                 | -69.85                                | -109.39                            | 7.97E-15                    | <b>7.91E-06</b>             | 4.92E-13                      | <b>0.000225</b>               |
| SpM1_ChORF1783_s_at | -           | <i>spy1783</i> | Unknown                 | Hypothetical protein           | Unknown                              | -                                     | -                                         | 94.05                                 | -23.66                                | -58.61                                | -35.86                             | 7.33E-16                    | <b>7.91E-06</b>             | 0.0003309                     | <b>0.000258</b>               |
| SpM1_ChORF0422_s_at | <i>metS</i> | <i>spy0422</i> | Protein synthesis       | tRNA synthetases               | tRNA synthetase                      | -                                     | -                                         | 93.32                                 | 51.36                                 | 184.20                                | -235.51                            | 7.95E-09                    | <b>7.91E-06</b>             | 5.59E-20                      | <b>0.000225</b>               |
| SpM1_ChORF1366_s_at | -           | <i>spy1366</i> | Unknown                 | Hypothetical membrane protein  | Unknown                              | -                                     | -                                         | 93.14                                 | -17.61                                | -17.70                                | 0.79                               | 3.59E-16                    | <b>7.91E-06</b>             | 0.6100044                     | 0.120232                      |
| SpM1_ChORF0309_s_at | -           | <i>spy0309</i> | Unknown                 | Hypothetical Cytosolic Protein | Unknown                              | -                                     | -                                         | 93.06                                 | -64.14                                | -64.06                                | -91.80                             | 1.19E-17                    | <b>7.91E-06</b>             | 5.30E-14                      | <b>0.000225</b>               |
| SpM1_ChORF1174_s_at | <i>oadA</i> | <i>spy1174</i> | Carbohydrate metabolism | Carbohydrate metabolism        | Carbohydrate central metabolism      | Essential                             | Essential                                 | 92.86                                 | -36.85                                | -45.17                                | -52.05                             | 1.09E-19                    | <b>7.91E-06</b>             | 1.50E-08                      | <b>0.000225</b>               |



| Probe Set Name*        | Gene Name   | Synonym                     | Category                | Subcategory                    | Function                             | <i>Bacillus subtilis</i> <sup>†</sup> | <i>Staphylococcus aureus</i> <sup>†</sup> | Difference Time (30 - 0) <sup>‡</sup> | Difference Time (60 - 0) <sup>‡</sup> | Difference Time (90 - 0) <sup>‡</sup> | Difference (Mut - WT) <sup>‡</sup> | P-value (Time) <sup>§</sup> | Q-value (Time) <sup>§</sup> | P-value (Strain) <sup>§</sup> | Q-value (Strain) <sup>§</sup> |
|------------------------|-------------|-----------------------------|-------------------------|--------------------------------|--------------------------------------|---------------------------------------|-------------------------------------------|---------------------------------------|---------------------------------------|---------------------------------------|------------------------------------|-----------------------------|-----------------------------|-------------------------------|-------------------------------|
| SpM1_ChORF0428_s_at    | <i>spyA</i> | <i>spy0428</i>              | Virulence               | Virulence interacting proteins | Extracellular protein                | -                                     | -                                         | 92.79                                 | 259.94                                | 359.47                                | 37.27                              | 4.11E-06                    | <b>7.91E-06</b>             | 0.2829484                     | 0.060301                      |
| SpM1_ChORF1373_s_at    | <i>ptsH</i> | <i>spy1373</i>              | Carbohydrate metabolism | Carbohydrate assimilation      | Carbohydrate assimilation            | -                                     | -                                         | 92.77                                 | -1517.81                              | -2171.01                              | 121.63                             | 4.28E-24                    | <b>7.91E-06</b>             | 0.4629532                     | 0.094371                      |
| SpM1_ChORF0539_s_at    | -           | <i>spy0539</i>              | Unknown                 | Hypothetical protein           | Unknown                              | -                                     | -                                         | 92.64                                 | 40.46                                 | -14.49                                | -63.68                             | 7.84E-14                    | <b>7.91E-06</b>             | 6.38E-12                      | <b>0.000225</b>               |
| SpM1_ChORF0205_s_at    | -           | <i>spy0205</i>              | Unknown                 | Hypothetical protein           | Unknown                              | -                                     | -                                         | 92.61                                 | 11.56                                 | 75.51                                 | -55.39                             | 1.42E-09                    | <b>7.91E-06</b>             | 5.66E-06                      | <b>0.000225</b>               |
| SpM1_ChORF0230_s_at    | -           | <i>spy0230</i>              | Membrane transport      | Membrane transport             | Unknown substrate membrane transport | -                                     | -                                         | 92.50                                 | 180.32                                | 323.61                                | 484.13                             | 9.90E-19                    | <b>7.91E-06</b>             | 1.04E-36                      | <b>0.000225</b>               |
| SpM1_ChORF0229_s_at    | -           | <i>spy0229</i>              | Membrane transport      | Membrane transport             | Unknown substrate membrane transport | Essential                             | -                                         | 92.39                                 | 217.32                                | 411.92                                | 895.20                             | 2.75E-17                    | <b>7.91E-06</b>             | 7.92E-44                      | <b>0.000225</b>               |
| SpM1_ChORF1989_s_at    | -           | <i>spy1989</i>              | Unknown                 | Hypothetical cytosolic Protein | Unknown                              | -                                     | -                                         | 92.32                                 | 174.66                                | 136.55                                | 66.63                              | 6.50E-10                    | <b>7.91E-06</b>             | 6.70E-05                      | <b>0.000225</b>               |
| SpM1_ChORF0443_s_at    | <i>gcaD</i> | <i>spy0443</i>              | Cell envelope           | Cell wall                      | Aminosugar metabolism                | -                                     | -                                         | 91.20                                 | -214.52                               | -331.55                               | -395.72                            | 2.42E-13                    | <b>7.91E-06</b>             | 8.59E-18                      | <b>0.000225</b>               |
| SpM1_ChORF1903_s_at    | -           | <i>spy1903</i>              | Unknown                 | Hypothetical protein           | Unknown                              | -                                     | -                                         | 91.03                                 | -25.57                                | -57.56                                | -22.31                             | 2.24E-15                    | <b>7.91E-06</b>             | 0.0106108                     | 0.003022                      |
| SpM1_ChORF1674_s_at    | -           | <i>spy1674</i>              | Membrane transport      | Membrane transport             | Unknown substrate membrane transport | -                                     | -                                         | 90.96                                 | 175.51                                | 217.00                                | -164.29                            | 2.09E-05                    | <b>7.91E-06</b>             | 9.78E-07                      | <b>0.000225</b>               |
| SpM12_ChORF299-61_s_at | -           | <i>SpyoM12_ChORF_299_61</i> | Unknown                 | Hypothetical protein           | Unknown                              | Essential                             | -                                         | 90.61                                 | 4.59                                  | 1.79                                  | -69.90                             | 9.07E-12                    | <b>7.91E-06</b>             | 3.01E-17                      | <b>0.000225</b>               |
| SpM1_ChORF0041_s_at    | -           | <i>spy0041</i>              | Unknown                 | Hypothetical protein           | Unknown                              | -                                     | -                                         | 90.46                                 | 302.13                                | 345.69                                | 248.95                             | 1.17E-09                    | <b>7.91E-06</b>             | 4.59E-10                      | <b>0.000225</b>               |
| SpM1_ChORF0733_at      | -           | <i>spy0733</i>              | Unknown                 | Hypothetical protein           | Unknown                              | -                                     | -                                         | 90.23                                 | 154.56                                | 112.56                                | 277.90                             | 3.31E-09                    | <b>7.91E-06</b>             | 6.75E-26                      | <b>0.000225</b>               |
| SpM1_ChORF0316_s_at    | -           | <i>spy0316</i>              | Unknown                 | Hypothetical protein           | Unknown                              | -                                     | -                                         | 90.11                                 | -112.56                               | -236.50                               | -67.98                             | 1.40E-18                    | <b>7.91E-06</b>             | 0.000509                      | <b>0.000291</b>               |
| SpM18_ChORF1979_s_at   | -           | <i>spyM18_1979</i>          | RNA metabolism          | Transcription regulation       | Signal transduction                  | -                                     | -                                         | 90.10                                 | 0.43                                  | -12.76                                | -30.52                             | 2.37E-10                    | <b>7.91E-06</b>             | 0.0002962                     | <b>0.000252</b>               |
| SpM12_ChORF299-60_at   | -           | <i>SpyoM12_ChORF_299_60</i> | Unknown                 | Hypothetical protein           | Unknown                              | Essential                             | -                                         | 89.83                                 | 2.54                                  | -8.60                                 | -84.23                             | 1.90E-11                    | <b>7.91E-06</b>             | 1.25E-17                      | <b>0.000225</b>               |
| SpM1_ChORF0538_s_at    | <i>metK</i> | <i>spy0538</i>              | Cofactors               | S-adenosylmethionine           | S-adenosylmethionine biosynthesis    | -                                     | -                                         | 89.77                                 | 30.61                                 | -16.76                                | -63.97                             | 3.38E-14                    | <b>7.91E-06</b>             | 1.35E-12                      | <b>0.000225</b>               |
| SpM12_ChORF299-64_at   | -           | <i>SpyoM12_ChORF_299_64</i> | Unknown                 | Hypothetical protein           | Unknown                              | -                                     | -                                         | 89.77                                 | 19.84                                 | 26.81                                 | -93.70                             | 3.37E-09                    | <b>7.91E-06</b>             | 5.17E-18                      | <b>0.000225</b>               |
| SpM1_ChORF1820_s_at    | -           | <i>spy1820</i>              | Unknown                 | Hypothetical cytosolic Protein | Unknown                              | -                                     | -                                         | 89.75                                 | 445.61                                | 407.00                                | 9.71                               | 4.12E-18                    | <b>7.91E-06</b>             | 0.3680607                     | 0.076768                      |
| SpM1_ChORF1897_s_at    | -           | <i>spy1897</i>              | Unknown                 | Hypothetical membrane protein  | Unknown                              | -                                     | -                                         | 89.60                                 | -84.72                                | -108.18                               | -16.45                             | 3.62E-21                    | <b>7.91E-06</b>             | 0.0672686                     | 0.016315                      |

| Probe Set Name*       | Gene Name   | Synonym                                | Category                | Subcategory                        | Function                           | <i>Bacillus subtilis</i> † | <i>Staphylococcus aureus</i> † | Difference Time (30 - 0)‡ | Difference Time (60 - 0)‡ | Difference Time (90 - 0)‡ | Difference (Mut - WT)‡ | P-value (Time)§ | Q-value (Time)§ | P-value (Strain)§ | Q-value (Strain)§ |
|-----------------------|-------------|----------------------------------------|-------------------------|------------------------------------|------------------------------------|----------------------------|--------------------------------|---------------------------|---------------------------|---------------------------|------------------------|-----------------|-----------------|-------------------|-------------------|
| SpM1_ChORF0496_s_at   | <i>mutR</i> | <i>spy0496</i>                         | RNA metabolism          | Transcription r                    | regulation                         | -                          | -                              | 89.22                     | -31.23                    | -54.12                    | -36.37                 | 8.45E-18        | <b>7.91E-06</b> | 9.36E-06          | <b>0.000225</b>   |
| SpM1_ChORF0805_s_at   | <i>rpml</i> | <i>spy0805</i>                         | Protein synthesis       | Ribosomal                          | Ribosomal protein                  | -                          | -                              | 89.12                     | -298.85                   | -12.85                    | -55.50                 | 1.23E-05        | <b>7.91E-06</b> | 0.8275343         | 0.155852          |
| SpM1_ChORF0841_s_at   | -           | <i>spy0841</i>                         | Unknown                 | Hypothetical                       | Unknown                            | -                          | -                              | 88.40                     | -68.67                    | -13.78                    | -78.52                 | 0.0001197       | <b>8.35E-06</b> | 0.0042814         | 0.001309          |
| SpM12_ChORF299-63_at  | -           | <i>SpyoM12_Ch</i><br><i>ORF_299_63</i> | Unknown                 | Hypothetical                       | Unknown                            | -                          | -                              | 87.84                     | 11.56                     | 13.38                     | -66.87                 | 1.17E-10        | <b>7.91E-06</b> | 1.78E-15          | <b>0.000225</b>   |
| SpM1_ChORF0744_s_at   | <i>sagG</i> | <i>spy0744</i>                         | Membrane transport      | Membrane transport                 | Drug, cytolysin membrane transport | Essential                  | Essential                      | 87.24                     | 1147.19                   | 1804.35                   | 1227.78                | 9.00E-30        | <b>7.91E-06</b> | 5.14E-28          | <b>0.000225</b>   |
| SpM1_ChORF2090_s_at   | <i>hutG</i> | <i>spy2090</i>                         | Amino acid metabolism   | Amino acid catabolism              | Amino acid catabolism              | -                          | -                              | 87.22                     | 83.80                     | 117.91                    | -60.36                 | 1.82E-08        | <b>7.91E-06</b> | 8.95E-06          | <b>0.000225</b>   |
| SpM12_ChORF248-9_s_at | -           | <i>SpyoM12_Ch</i><br><i>ORF_248_9</i>  | Unknown                 | Hypothetical                       | Unknown                            | Essential                  | Essential                      | 86.98                     | 18.84                     | 46.12                     | -40.01                 | 8.29E-08        | <b>7.91E-06</b> | 0.0002094         | <b>0.000238</b>   |
| SpM1_ChORF1258_s_at   | -           | <i>spy1258</i>                         | RNA metabolism          | Transcription r                    | regulation                         | -                          | -                              | 86.57                     | 0.47                      | 2.60                      | -4.97                  | 1.22E-13        | <b>7.91E-06</b> | 0.0828198         | 0.019692          |
| SpM1_ChORF1911_s_at   | <i>salY</i> | <i>spy1911</i>                         | Membrane transport      | Membrane transport                 | Lantibiotic membrane transport     | -                          | -                              | 86.16                     | -16.22                    | -29.86                    | -26.42                 | 1.64E-11        | <b>7.91E-06</b> | 0.0018182         | 0.000611          |
| SpM1_ChORF0383_s_at   | <i>fhuG</i> | <i>spy0383</i>                         | Membrane transport      | Membrane transport                 | Metal ion membrane transport       | -                          | -                              | 86.07                     | 12.79                     | -37.68                    | 5.04                   | 6.36E-12        | <b>7.91E-06</b> | 0.6405043         | 0.12519           |
| SpM1_ChORF1082_at     | <i>srtK</i> | <i>spy1082</i>                         | RNA metabolism          | Transcription r                    | Signal transduction                | -                          | -                              | 85.69                     | -27.73                    | -72.87                    | -18.94                 | 1.54E-17        | <b>7.91E-06</b> | 0.0139395         | 0.0039            |
| SpM18_ChORF1348_x_at  | -           | <i>spyM18_1348</i>                     | Unknown                 | Hypothetical                       | Unknown                            | -                          | -                              | 85.64                     | 37.90                     | 14.80                     | -51.24                 | 5.88E-05        | <b>8.02E-06</b> | 0.0001257         | <b>0.000229</b>   |
| SpM1_ChORF1131_s_at   | -           | <i>spy1131</i>                         | Membrane transport      | Membrane transport                 | Drug, cytolysin membrane transport | -                          | -                              | 85.62                     | -55.17                    | -73.15                    | -32.69                 | 1.14E-15        | <b>7.91E-06</b> | 0.0008979         | <b>0.000371</b>   |
| SpM1_ChORF1364_s_at   | <i>dnaX</i> | <i>spy1364</i>                         | DNA metabolism          | Basic replication machinery        | DNA replication                    | -                          | -                              | 85.61                     | -145.57                   | -51.45                    | -94.75                 | 3.23E-05        | <b>7.92E-06</b> | 0.0196099         | 0.005363          |
| SpM1_ChORF0172_s_at   | <i>metB</i> | <i>spy0172</i>                         | Amino acid metabolism   | Amino acid catabolism              | Amino acid catabolism              | -                          | -                              | 85.42                     | 118.15                    | 12.66                     | 348.97                 | 0.0006883       | <b>1.29E-05</b> | 6.48E-27          | <b>0.000225</b>   |
| SpM1_ChORF1115_s_at   | -           | <i>spy1115</i>                         | Unknown                 | Hypothetical                       | Unknown                            | -                          | -                              | 85.37                     | -52.23                    | -98.80                    | -44.47                 | 5.03E-18        | <b>7.91E-06</b> | 6.87E-05          | <b>0.000225</b>   |
| SpM1_ChORF1766_s_at   | -           | <i>spy1766</i>                         | Carbohydrate metabolism | Carbohydrate central metabolism    | Carbohydrate central metabolism    | -                          | -                              | 85.23                     | 132.55                    | 77.31                     | 9.38                   | 2.49E-11        | <b>7.91E-06</b> | 0.5470575         | 0.109358          |
| SpM1_ChORF1106_s_at   | -           | <i>spy1106</i>                         | RNA metabolism          | Transcription r                    | Signal transduction                | Essential                  | Essential                      | 84.85                     | 36.47                     | 29.53                     | 1.22                   | 7.60E-10        | <b>7.91E-06</b> | 0.8458875         | 0.158139          |
| SpM1_ChORF0826_s_at   | <i>lsp</i>  | <i>spy0826</i>                         | Protein synthesis       | Protein translocation              | Protein secretion                  | -                          | -                              | 84.22                     | -23.53                    | -67.27                    | -45.78                 | 8.41E-14        | <b>7.91E-06</b> | 9.75E-06          | <b>0.000225</b>   |
| SpM1_ChORF1851_s_at   | <i>cppA</i> | <i>spy1851</i>                         | Virulence               | Virulence interacting proteins     | Extracellular protein              | -                          | -                              | 84.17                     | -198.87                   | -129.85                   | 19.35                  | 3.23E-14        | <b>7.91E-06</b> | 0.1678283         | 0.037471          |
| SpM1_ChORF1850_s_at   | -           | <i>spy1850</i>                         | Unknown                 | Hypothetical extracellular protein | Unknown                            | -                          | -                              | 84.17                     | -122.45                   | -94.62                    | -66.78                 | 1.14E-17        | <b>7.91E-06</b> | 1.13E-05          | <b>0.000225</b>   |
| SpM1_ChORF0458_s_at   | -           | <i>spy0458</i>                         | Unknown                 | Hypothetical                       | Unknown                            | -                          | -                              | 83.99                     | -18.06                    | 86.38                     | -42.79                 | 2.96E-07        | <b>7.91E-06</b> | 0.0090447         | 0.002614          |
| SpM1_ChORF1081_at     | <i>srtR</i> | <i>spy1081</i>                         | RNA metabolism          | Transcription r                    | Signal transduction                | -                          | -                              | 83.77                     | -7.92                     | -0.62                     | -7.45                  | 4.04E-15        | <b>7.91E-06</b> | 0.0673815         | 0.016331          |
| SpM1_ChORF1537_s_at   | <i>kdtB</i> | <i>spy1537</i>                         | Cofactors               |                                    |                                    | -                          | -                              | 83.68                     | -14.40                    | -59.16                    | 32.14                  | 1.55E-18        | <b>7.91E-06</b> | 0.0014478         | <b>0.00051</b>    |

| Probe Set Name*      | Gene Name   | Synonym            | Category                | Subcategory                    | Function                       | <i>Bacillus subtilis</i> <sup>†</sup> | <i>Staphylococcus aureus</i> <sup>†</sup> | Difference Time (30 - 0) <sup>‡</sup> | Difference Time (60 - 0) <sup>‡</sup> | Difference Time (90 - 0) <sup>‡</sup> | Difference (Mut - WT) <sup>‡</sup> | P-value (Time) <sup>§</sup> | Q-value (Time) <sup>§</sup> | P-value (Strain) <sup>§</sup> | Q-value (Strain) <sup>§</sup> |
|----------------------|-------------|--------------------|-------------------------|--------------------------------|--------------------------------|---------------------------------------|-------------------------------------------|---------------------------------------|---------------------------------------|---------------------------------------|------------------------------------|-----------------------------|-----------------------------|-------------------------------|-------------------------------|
| SpM18_ChORF1666_s_at | <i>trxB</i> | <i>spyM18_1666</i> | Amino acid metabolism   | Amino acid catabolism          | Amino acid catabolism          | Essential                             | Essential                                 | 83.47                                 | -5.40                                 | 33.86                                 | -20.91                             | 0.0126983                   | <b>0.000163</b>             | 0.1006543                     | 0.02357                       |
| SpM1_ChORF1022_s_at  | <i>estA</i> | <i>spy1022</i>     | Unknown                 | Hypothetical protein           | Unknown                        | Essential                             | -                                         | 83.30                                 | 106.40                                | 20.99                                 | -39.24                             | 6.37E-09                    | <b>7.91E-06</b>             | 0.0006681                     | <b>0.000321</b>               |
| M12_0965_at          | -           | <i>M12_0965</i>    | Unknown                 | Hypothetical protein           | Unknown                        | -                                     | -                                         | 83.24                                 | 83.42                                 | 71.97                                 | -22.09                             | 2.48E-06                    | <b>7.91E-06</b>             | 0.0738953                     | 0.017726                      |
| SpM1_ChORF1272_s_at  | -           | <i>spy1272</i>     | Membrane transport      | Membrane transport             | Metal ion membrane transport   | -                                     | -                                         | 82.96                                 | 66.63                                 | 118.03                                | -8.33                              | 7.95E-07                    | <b>7.91E-06</b>             | 0.5991252                     | 0.118444                      |
| SpM1_ChORF0999_at    | -           | <i>spy0999</i>     | Phage                   | Phage proteins                 | Hypothetical cytosolic protein | -                                     | -                                         | 82.80                                 | 93.37                                 | 165.85                                | -175.32                            | 2.59E-11                    | <b>7.91E-06</b>             | 7.07E-21                      | <b>0.000225</b>               |
| SpM1_ChORF1117_s_at  | -           | <i>spy1117</i>     | Unknown                 | Hypothetical membrane protein  | Unknown                        | -                                     | -                                         | 82.40                                 | -41.79                                | -101.64                               | -43.40                             | 3.34E-18                    | <b>7.91E-06</b>             | 4.18E-05                      | <b>0.000225</b>               |
| SpM1_ChORF1836_s_at  | -           | <i>spy1836</i>     | Cell envelope           | Cell wall                      |                                | -                                     | -                                         | 82.30                                 | 26.85                                 | -19.59                                | -49.39                             | 1.83E-13                    | <b>7.91E-06</b>             | 1.87E-08                      | <b>0.000225</b>               |
| SpM1_ChORF1209_s_at  | <i>pdxK</i> | <i>spy1209</i>     | Cofactors               |                                | Pyridoxine                     | -                                     | -                                         | 82.25                                 | 10.13                                 | -0.92                                 | -25.37                             | 4.07E-10                    | <b>7.91E-06</b>             | 0.0003235                     | <b>0.000256</b>               |
| SpM1_ChORF1731_s_at  | -           | <i>spy1731</i>     | Unknown                 | Hypothetical protein           | Unknown                        | -                                     | -                                         | 81.66                                 | 123.77                                | 86.71                                 | -28.40                             | 1.32E-07                    | <b>7.91E-06</b>             | 0.0274399                     | 0.007261                      |
| SpM1_ChORF1534_s_at  | -           | <i>spy1534</i>     | Unknown                 | Hypothetical cytosolic Protein | Unknown                        | -                                     | -                                         | 81.57                                 | 21.91                                 | -28.71                                | -3.82                              | 6.16E-13                    | <b>7.91E-06</b>             | 0.2929867                     | 0.062214                      |
| SpM3_ChORF0493_s_at  | -           | <i>SpyM3_0493</i>  | Unknown                 | Hypothetical protein           | Unknown                        | -                                     | -                                         | 81.33                                 | -152.63                               | -195.65                               | -100.46                            | 3.04E-17                    | <b>7.91E-06</b>             | 4.14E-07                      | <b>0.000225</b>               |
| SpM1_ChORF0484_s_at  | -           | <i>spy0484</i>     | Unknown                 | Hypothetical protein           | Unknown                        | -                                     | -                                         | 81.07                                 | -0.60                                 | -29.90                                | -42.26                             | 4.82E-14                    | <b>7.91E-06</b>             | 1.69E-07                      | <b>0.000225</b>               |
| SpM1_ChORF2169_s_at  | -           | <i>spy2169</i>     | Phage                   | Phage proteins                 |                                | -                                     | -                                         | 81.04                                 | 5.35                                  | -32.88                                | -96.89                             | 2.74E-07                    | <b>7.91E-06</b>             | 1.60E-11                      | <b>0.000225</b>               |
| M12_0089_s_at        | -           | <i>M12_0089</i>    | Phage                   | Phage proteins                 |                                | -                                     | -                                         | 80.64                                 | -12.99                                | -38.17                                | -9.30                              | 2.54E-14                    | <b>7.91E-06</b>             | 0.1173482                     | 0.027078                      |
| SpM1_ChORF0807_s_at  | -           | <i>spy0807</i>     | Unknown                 | Hypothetical membrane protein  | Unknown                        | -                                     | -                                         | 80.56                                 | -210.55                               | -319.57                               | -13.67                             | 1.94E-19                    | <b>7.91E-06</b>             | 0.136014                      | 0.030818                      |
| SpM1_ChORF1776_s_at  | -           | <i>spy1776</i>     | Cofactors               | NAD                            | NAD biosynthesis               | -                                     | -                                         | 80.45                                 | 57.60                                 | 35.54                                 | -39.56                             | 4.55E-06                    | <b>7.91E-06</b>             | 0.0005308                     | <b>0.000294</b>               |
| SpM1_ChORF0754_s_at  | <i>atpE</i> | <i>spy0754</i>     | Carbohydrate metabolism | Bioenergetics                  | Bioenergetics                  | Essential                             | Essential                                 | 80.30                                 | -158.17                               | -197.22                               | -100.85                            | 4.72E-19                    | <b>7.91E-06</b>             | 5.37E-08                      | <b>0.000225</b>               |
| SpM18_ChORF2202_s_at | -           | <i>spyM18_2202</i> | Unknown                 | Hypothetical protein           | Unknown                        | -                                     | -                                         | 79.96                                 | 28.60                                 | 47.82                                 | -75.11                             | 0.0008466                   | <b>1.44E-05</b>             | 1.58E-06                      | <b>0.000225</b>               |
| SpM1_ChORF1293_s_at  | <i>malR</i> | <i>spy1293</i>     | RNA metabolism          | Transcription r egulation      |                                | -                                     | -                                         | 79.87                                 | 32.95                                 | 20.80                                 | 13.15                              | 4.16E-15                    | <b>7.91E-06</b>             | 0.0654552                     | 0.015908                      |
| SpM1_ChORF0510_s_at  | -           | <i>spy0510</i>     | Carbohydrate metabolism | Carbohydrate assimilation      | Carbohydrate assimilation      | -                                     | -                                         | 79.41                                 | -0.35                                 | -20.52                                | 0.11                               | 7.44E-13                    | <b>7.91E-06</b>             | 0.879316                      | 0.163414                      |
| SpM1_ChORF0506_s_at  | <i>pcp</i>  | <i>spy0506</i>     | Amino acid metabolism   | Amino acid catabolism          | Amino acid catabolism          | -                                     | -                                         | 79.34                                 | 121.41                                | 103.64                                | -237.59                            | 2.14E-06                    | <b>7.91E-06</b>             | 1.60E-22                      | <b>0.000225</b>               |
| SpM1_ChORF2004_s_at  | <i>dppE</i> | <i>spy2004</i>     | Membrane transport      | Membrane transport             | Peptide membrane transport     | -                                     | -                                         | 78.74                                 | 11.32                                 | -2.70                                 | -194.08                            | 0.0002868                   | <b>9.46E-06</b>             | 3.79E-21                      | <b>0.000225</b>               |
| SpM1_ChORF1012_s_at  | -           | <i>spy1012</i>     | Unknown                 | Hypothetical protein           | Unknown                        | -                                     | -                                         | 78.64                                 | 163.19                                | -71.16                                | -139.59                            | 3.82E-12                    | <b>7.91E-06</b>             | 9.68E-12                      | <b>0.000225</b>               |
| SpM1_ChORF1647_s_at  | -           | <i>spy1647</i>     | Unknown                 | Hypothetical cytosolic Protein | Unknown                        | -                                     | -                                         | 78.27                                 | -33.56                                | -38.02                                | -24.04                             | 2.02E-18                    | <b>7.91E-06</b>             | 6.90E-05                      | <b>0.000225</b>               |
| SpM1_ChORF1934_s_at  | -           | <i>spy1934</i>     | RNA metabolism          | Transcription r egulation      |                                | -                                     | -                                         | 77.98                                 | 4.02                                  | 24.96                                 | -64.51                             | 0.0001013                   | <b>8.24E-06</b>             | 1.31E-06                      | <b>0.000225</b>               |

| Probe Set Name*        | Gene Name         | Synonym                       | Category                | Subcategory                     | Function                             | <i>Bacillus subtilis</i> <sup>†</sup> | <i>Staphylococcus aureus</i> <sup>†</sup> | Difference Time (30 - 0) <sup>‡</sup> | Difference Time (60 - 0) <sup>‡</sup> | Difference Time (90 - 0) <sup>‡</sup> | Difference (Mut - WT) <sup>‡</sup> | P-value (Time) <sup>§</sup> | Q-value (Time) <sup>§</sup> | P-value (Strain) <sup>§</sup> | Q-value (Strain) <sup>§</sup> |
|------------------------|-------------------|-------------------------------|-------------------------|---------------------------------|--------------------------------------|---------------------------------------|-------------------------------------------|---------------------------------------|---------------------------------------|---------------------------------------|------------------------------------|-----------------------------|-----------------------------|-------------------------------|-------------------------------|
| SpM1_ChORF1017_x_at    | -                 | <i>spy1017</i>                | Unknown                 | Hypothetical protein            | Unknown                              | -                                     | -                                         | 77.93                                 | 74.39                                 | -22.64                                | -59.89                             | 1.49E-09                    | <b>7.91E-06</b>             | 2.84E-07                      | <b>0.000225</b>               |
| SpM1_ChORF0003_s_at    | <i>dnaN</i>       | <i>spy0003</i>                | DNA metabolism          | Basic DNA replication machinery | DNA replication                      | -                                     | -                                         | 76.90                                 | 253.14                                | -3.97                                 | -71.01                             | 1.84E-15                    | <b>7.91E-06</b>             | 4.39E-05                      | <b>0.000225</b>               |
| SpM1_ChORF2112_s_at    | -                 | <i>spy2112</i>                | Unknown                 | Hypothetical cytosolic Protein  | Unknown                              | -                                     | -                                         | 76.79                                 | 308.60                                | 98.76                                 | -44.26                             | 5.48E-07                    | <b>7.91E-06</b>             | 0.1536077                     | 0.034471                      |
| SpM1_ChORF0558_s_at    | -                 | <i>spy0558</i>                | Unknown                 | Hypothetical protein            | Unknown                              | -                                     | -                                         | 76.73                                 | 6.77                                  | 5.28                                  | -60.92                             | 9.36E-06                    | <b>7.91E-06</b>             | 7.15E-08                      | <b>0.000225</b>               |
| SpM1_ChORF1672_s_at    | <i>proA</i>       | <i>spy1670</i>                | Amino acid metabolism   | Amino acid biosynthesis         | Amino acid biosynthesis              | -                                     | -                                         | 76.65                                 | 66.84                                 | 37.44                                 | -12.88                             | 1.91E-08                    | <b>7.91E-06</b>             | 0.0475258                     | 0.011871                      |
| SpM1_ChORF1018_s_at    | -                 | <i>spy1018</i>                | Membrane transport      | Membrane transport              | Unknown substrate membrane transport | -                                     | -                                         | 76.55                                 | 69.58                                 | -9.70                                 | -59.74                             | 1.13E-10                    | <b>7.91E-06</b>             | 2.71E-09                      | <b>0.000225</b>               |
| SpM1_ChORF1533_s_at    | -                 | <i>spy1533</i>                | Unknown                 | Hypothetical cytosolic Protein  | Unknown                              | -                                     | -                                         | 76.12                                 | 20.14                                 | -13.80                                | 72.50                              | 0.0221915                   | <b>0.00028</b>              | 0.002179                      | 0.000715                      |
| SpM1_ChORF1031_s_at    | <i>acoL, pdhD</i> | <i>spy1031</i>                | Carbohydrate metabolism | Bioenergetics                   | Glycolysis                           | -                                     | -                                         | 75.93                                 | 456.24                                | 643.53                                | -233.95                            | 1.94E-12                    | <b>7.91E-06</b>             | 1.57E-05                      | <b>0.000225</b>               |
| SpM1_ChORF1054_at      | <i>sclB</i>       | <i>spy1054</i>                | Virulence               | Virulence interacting proteins  | Cell surface protein                 | -                                     | -                                         | 75.70                                 | 38.63                                 | 78.04                                 | 77.69                              | 1.34E-05                    | <b>7.91E-06</b>             | 2.91E-08                      | <b>0.000225</b>               |
| SpM1_ChORF0570_s_at    | -                 | <i>spy0570</i>                | Membrane transport      | Membrane transport              | Unknown substrate membrane transport | Essential                             | Essential                                 | 75.35                                 | -26.74                                | -36.53                                | 104.61                             | 4.39E-11                    | <b>7.91E-06</b>             | 4.44E-15                      | <b>0.000225</b>               |
| SpM1_ChORF1273_s_at    | <i>cfa</i>        | <i>spy1273</i>                | Virulence               | Virulence interacting proteins  | Exotoxin                             | -                                     | -                                         | 75.14                                 | 112.01                                | 62.89                                 | 132.61                             | 2.56E-06                    | <b>7.91E-06</b>             | 3.23E-13                      | <b>0.000225</b>               |
| SpM1_ChORF2165_s_at    | -                 | <i>spy2165</i>                | Phage                   | Phage proteins                  |                                      | -                                     | -                                         | 74.73                                 | 30.15                                 | 22.92                                 | -78.72                             | 0.0002525                   | <b>9.23E-06</b>             | 8.55E-09                      | <b>0.000225</b>               |
| SpM1_ChORF1175_s_at    | -                 | <i>spy1175</i>                | Unknown                 | Hypothetical protein            | Unknown                              | -                                     | -                                         | 74.66                                 | -25.44                                | -38.02                                | -50.40                             | 2.16E-20                    | <b>7.91E-06</b>             | 2.01E-11                      | <b>0.000225</b>               |
| SpM12_ChORF299-52_s_at | -                 | <i>SpyoM12_Chr ORF_299_52</i> | Unknown                 | Hypothetical protein            | Unknown                              | -                                     | -                                         | 74.59                                 | -49.11                                | -86.62                                | -134.36                            | 5.71E-17                    | <b>7.91E-06</b>             | 3.92E-21                      | <b>0.000225</b>               |
| SpM1_ChORF1488_s_at    | <i>int2</i>       | <i>spy1488</i>                | Phage                   | Phage proteins                  |                                      | -                                     | -                                         | 74.28                                 | 46.67                                 | 96.86                                 | -104.17                            | 6.29E-09                    | <b>7.91E-06</b>             | 4.58E-16                      | <b>0.000225</b>               |
| SpM1_ChORF1493_s_at    | -                 | <i>spy1493</i>                | Unknown                 | Hypothetical cytosolic Protein  | Unknown                              | -                                     | -                                         | 74.00                                 | 108.06                                | -38.04                                | -96.91                             | 3.00E-05                    | <b>7.91E-06</b>             | 2.50E-05                      | <b>0.000225</b>               |
| SpM1_ChORF1771_s_at    | <i>gatA</i>       | <i>spy1771</i>                | Protein synthesis       | tRNA synthetases                | tRNA synthetase                      | Essential                             | -                                         | 73.68                                 | -200.85                               | -340.75                               | -235.75                            | 6.13E-17                    | <b>7.91E-06</b>             | 2.04E-11                      | <b>0.000225</b>               |
| SpM1_ChORF2162_s_at    | <i>cadD</i>       | <i>spy2162</i>                | Membrane transport      | Membrane transport              | Metal ion membrane transport         | -                                     | -                                         | 73.67                                 | 13.26                                 | -16.36                                | -49.30                             | 4.98E-12                    | <b>7.91E-06</b>             | 4.39E-10                      | <b>0.000225</b>               |
| SpM1_ChORF1289_s_at    | -                 | <i>spy1289</i>                | Unknown                 | Hypothetical protein            | Unknown                              | -                                     | -                                         | 72.73                                 | 16.96                                 | -37.68                                | -16.38                             | 3.44E-09                    | <b>7.91E-06</b>             | 0.0578671                     | 0.014248                      |
| SpM1_ChORF2001_s_at    | <i>dppB</i>       | <i>spy2001</i>                | Membrane transport      | Membrane transport              | Peptide membrane transport           | -                                     | -                                         | 72.72                                 | -4.78                                 | -36.36                                | -133.48                            | 2.11E-09                    | <b>7.91E-06</b>             | 2.23E-20                      | <b>0.000225</b>               |
| SpM12_ChORF299-57_s_at | -                 | <i>SpyoM12_Chr ORF_299_57</i> | Unknown                 | Hypothetical protein            | Unknown                              | Essential                             | -                                         | 72.13                                 | -22.16                                | -52.64                                | -99.73                             | 1.34E-17                    | <b>7.91E-06</b>             | 5.38E-22                      | <b>0.000225</b>               |

| Probe Set Name*         | Gene Name         | Synonym                     | Category           | Subcategory                    | Function                          | <i>Bacillus subtilis</i> † | <i>Staphylococcus aureus</i> † | Difference Time (30 - 0)‡ | Difference Time (60 - 0)‡ | Difference Time (90 - 0)‡ | Difference (Mut - WT)‡ | P-value (Time)§ | Q-value (Time)§ | P-value (Strain)§ | Q-value (Strain)§ |
|-------------------------|-------------------|-----------------------------|--------------------|--------------------------------|-----------------------------------|----------------------------|--------------------------------|---------------------------|---------------------------|---------------------------|------------------------|-----------------|-----------------|-------------------|-------------------|
| SpM1_ChORF2177_s_at     | -                 | <i>spy2177</i>              | RNA metabolism     | Transcription r                | regulation                        | -                          | -                              | 72.05                     | 12.57                     | 1.11                      | -23.57                 | 2.39E-09        | <b>7.91E-06</b> | 0.0001191         | <b>0.000228</b>   |
| M12_0090_s_at           | -                 | <i>M12_0090</i>             | Phage              | Phage proteins                 |                                   | -                          | -                              | 71.51                     | -48.91                    | -103.86                   | -4.51                  | 2.67E-16        | <b>7.91E-06</b> | 0.4244819         | 0.087237          |
| SpM1_ChORF1570_at       | -                 | <i>spy1570</i>              | Stress adaptation  | Heat shock proteins            | Heat shock proteins               | -                          | -                              | 71.33                     | -63.73                    | -65.10                    | -10.56                 | 5.94E-17        | <b>7.91E-06</b> | 0.2917092         | 0.06198           |
| SpM1_ChORF2099_s_at     | -                 | <i>spy2099</i>              | RNA metabolism     | Transcription r                | regulation                        | -                          | -                              | 71.16                     | -5.69                     | -3.35                     | -3.82                  | 6.48E-13        | <b>7.91E-06</b> | 0.2308352         | 0.050106          |
| SpM12_ChORF299-53_s_at  | -                 | <i>SpyoM12_ChORF_299_53</i> | Unknown            | Hypothetical protein           | Unknown                           | -                          | -                              | 71.12                     | -18.76                    | -24.60                    | -77.58                 | 4.18E-15        | <b>7.91E-06</b> | 3.63E-21          | <b>0.000225</b>   |
| SpM12_ChORF299-55_s_at  | -                 | <i>SpyoM12_ChORF_299_55</i> | Unknown            | Hypothetical protein           | Unknown                           | -                          | -                              | 70.97                     | -28.10                    | -33.58                    | -84.02                 | 4.51E-19        | <b>7.91E-06</b> | 7.45E-25          | <b>0.000225</b>   |
| SpM1_ChORF0546_s_at     | -                 | <i>spy0546</i>              | Unknown            | Hypothetical Cytosolic Protein | Unknown                           | -                          | -                              | 70.50                     | 14.35                     | 16.44                     | -35.98                 | 4.06E-14        | <b>7.91E-06</b> | 9.25E-11          | <b>0.000225</b>   |
| SpM1_ChORF1296_s_at     | <i>malG</i>       | <i>spy1296</i>              | Membrane transport | Membrane transport             | Carbohydrate membrane transport   | -                          | -                              | 70.21                     | 677.68                    | 534.88                    | 35.16                  | 2.89E-22        | <b>7.91E-06</b> | 0.2475252         | 0.053432          |
| SpM1_ChORF0918_s_at     | <i>tehA</i>       | <i>spy0918</i>              | Virulence          | Virulence interacting proteins | Exotoxin                          | -                          | -                              | 70.17                     | -4.77                     | 76.61                     | -62.60                 | 1.27E-06        | <b>7.91E-06</b> | 1.35E-05          | <b>0.000225</b>   |
| SpM1_ChORF1617_s_at     | -                 | <i>spy1617</i>              | Unknown            | Hypothetical cytosolic Protein | Unknown                           | -                          | -                              | 70.01                     | -55.80                    | -107.10                   | -26.90                 | 2.78E-18        | <b>7.91E-06</b> | 0.0031043         | 0.000974          |
| SpM1_ChORF2055_s_at     | -                 | <i>spy2055</i>              | Unknown            | Hypothetical protein           | Unknown                           | -                          | -                              | 69.92                     | 2508.30                   | 1873.30                   | 804.37                 | 3.83E-28        | <b>7.91E-06</b> | 3.98E-11          | <b>0.000225</b>   |
| SpM1_ChORF1040_s_at     | <i>hemN, hemC</i> | <i>spy1040</i>              | Cofactors          | S-adenosylmethionine           | S-adenosylmethionine biosynthesis | -                          | -                              | 69.56                     | -90.60                    | -135.02                   | -40.88                 | 6.73E-22        | <b>7.91E-06</b> | 0.0001484         | <b>0.00023</b>    |
| SpM1_ChORF2181_s_at     | -                 | <i>spy2181</i>              | Unknown            | Hypothetical cytosolic Protein | Unknown                           | -                          | -                              | 69.30                     | -88.74                    | -204.27                   | -70.39                 | 4.46E-21        | <b>7.91E-06</b> | 1.64E-06          | <b>0.000225</b>   |
| SpM1_ChORF0295_s_at     | <i>oppC</i>       | <i>spy0295</i>              | Membrane transport | Membrane transport             | Peptide membrane transport        | Essential                  | -                              | 69.29                     | 494.19                    | 331.71                    | 265.55                 | 6.61E-10        | <b>7.91E-06</b> | 6.42E-07          | <b>0.000225</b>   |
| SpM1_ChORF2120_s_at     | <i>lmrP</i>       | <i>spy2120</i>              | Unknown            | Hypothetical membrane protein  | Unknown                           | Essential                  | -                              | 69.15                     | -11.43                    | -52.84                    | -68.29                 | 1.57E-12        | <b>7.91E-06</b> | 1.32E-10          | <b>0.000225</b>   |
| SpM1_ChORF1515_s_at     | -                 | <i>spy1515</i>              | Unknown            | Hypothetical protein           | Unknown                           | -                          | -                              | 68.79                     | 30.37                     | -195.56                   | -40.32                 | 2.24E-10        | <b>7.91E-06</b> | 0.0454391         | 0.011406          |
| SpM49_ChORF7585-45_s_at | -                 | <i>spy1606</i>              | Unknown            | Hypothetical protein           | Unknown                           | -                          | -                              | 68.45                     | 142.36                    | 128.06                    | -4.55                  | 4.20E-15        | <b>7.91E-06</b> | 0.6112412         | 0.120408          |
| SpM1_ChORF0361_s_at     | <i>glr</i>        | <i>spy0361</i>              | Cell envelope      | Cell wall                      | Peptidoglycan biosynthesis        | -                          | -                              | 68.44                     | 24.51                     | -104.61                   | 59.11                  | 1.19E-14        | <b>7.91E-06</b> | 2.97E-05          | <b>0.000225</b>   |
| SpM1_ChORF1956_s_at     | -                 | <i>spy1956</i>              | Unknown            | Hypothetical protein           | Unknown                           | -                          | -                              | 68.22                     | -4.75                     | 18.62                     | -11.97                 | 0.0001007       | <b>8.24E-06</b> | 0.3078984         | 0.065144          |
| SpM12_ChORF299-59_s_at  | -                 | <i>SpyoM12_ChORF_299_59</i> | Unknown            | Hypothetical protein           | Unknown                           | Essential                  | -                              | 67.97                     | -18.99                    | -26.99                    | -74.02                 | 1.20E-12        | <b>7.91E-06</b> | 3.48E-17          | <b>0.000225</b>   |
| SpM1_ChORF1939_s_at     | -                 | <i>spy1939</i>              | Unknown            | Hypothetical protein           | Unknown                           | -                          | -                              | 67.59                     | -28.94                    | -153.70                   | -16.20                 | 1.14E-18        | <b>7.91E-06</b> | 0.0497411         | 0.012406          |
| SpM12_ChORF239-12_s_at  | -                 | <i>spy0012</i>              | Unknown            | Hypothetical protein           | Unknown                           | Essential                  | Essential                      | 67.58                     | -38.91                    | -109.54                   | -66.92                 | 2.12E-17        | <b>7.91E-06</b> | 7.32E-09          | <b>0.000225</b>   |

| Probe Set Name*        | Gene Name    | Synonym                       | Category                | Subcategory                            | Function                               | <i>Bacillus subtilis</i> † | <i>Staphylococcus aureus</i> † | Difference Time (30 - 0)‡ | Difference Time (60 - 0)‡ | Difference Time (90 - 0)‡ | Difference (Mut - WT)‡ | P-value (Time)§ | Q-value (Time)§ | P-value (Strain)§ | Q-value (Strain)§ |
|------------------------|--------------|-------------------------------|-------------------------|----------------------------------------|----------------------------------------|----------------------------|--------------------------------|---------------------------|---------------------------|---------------------------|------------------------|-----------------|-----------------|-------------------|-------------------|
| SpM1_ChORF2164_s_at    | -            | <i>spy2164</i>                | Phage                   | Phage proteins                         |                                        | -                          | -                              | 67.47                     | 14.48                     | 9.74                      | -70.08                 | 3.24E-05        | <b>7.92E-06</b> | 1.20E-09          | <b>0.000225</b>   |
| SpM1_ChORF0131_at      | -            | <i>spy0131</i>                | Unknown                 | Hypothetical cytosolic protein         | Unknown                                | -                          | -                              | 67.24                     | 274.91                    | 413.63                    | 308.67                 | 7.55E-21        | <b>7.91E-06</b> | 3.16E-21          | <b>0.000225</b>   |
| SpM1_ChORF0290_s_at    | -            | <i>spy0290</i>                | Cofactors               | Fe-sulfate cluster                     | Fe-sulfate cluster biosynthesis        | -                          | -                              | 67.03                     | -135.18                   | -218.94                   | -111.02                | 8.34E-21        | <b>7.91E-06</b> | 6.57E-09          | <b>0.000225</b>   |
| SpM18_ChORF0867_s_at   | <i>rpl35</i> | <i>spyM18_0867</i>            | Protein synthesis       | Ribosomal proteins                     | Ribosomal protein                      | -                          | -                              | 67.00                     | -354.25                   | -35.62                    | -108.64                | 8.03E-07        | <b>7.91E-06</b> | 0.3614283         | 0.075605          |
| SpM1_ChORF0488_s_at    | -            | <i>spy0488</i>                | Unknown                 | Hypothetical Cytosolic Protein         | Unknown                                | -                          | -                              | 66.99                     | -0.32                     | -31.27                    | -39.84                 | 7.72E-14        | <b>7.91E-06</b> | 1.35E-07          | <b>0.000225</b>   |
| SpyM3_1427_at          | -            | <i>SpyM3_1427</i>             | Phage                   | Phage proteins                         |                                        | -                          | -                              | 66.74                     | -17.09                    | -21.46                    | -69.28                 | 2.72E-12        | <b>7.91E-06</b> | 2.52E-17          | <b>0.000225</b>   |
| SpM1_ChORF2003_s_at    | <i>dppD</i>  | <i>spy2003</i>                | Membrane transport      | Membrane transport                     | Peptide membrane transport             | -                          | -                              | 66.41                     | 69.44                     | 103.91                    | -362.92                | 6.96E-06        | <b>7.91E-06</b> | 2.90E-37          | <b>0.000225</b>   |
| SpM1_ChORF0492_s_at    | -            | <i>spy0492</i>                | Unknown                 | Hypothetical protein                   | Unknown                                | -                          | -                              | 65.75                     | 33.67                     | 28.17                     | -48.39                 | 1.97E-08        | <b>7.91E-06</b> | 1.04E-10          | <b>0.000225</b>   |
| SpM1_ChORF0917_s_at    | -            | <i>spy0917</i>                | Unknown                 | Hypothetical Cytosolic Protein         | Unknown                                | -                          | -                              | 65.68                     | -1.25                     | 13.80                     | -38.28                 | 4.35E-10        | <b>7.91E-06</b> | 1.52E-07          | <b>0.000225</b>   |
| SpM1_ChORF1412_s_at    | -            | <i>spy1412</i>                | Unknown                 | Hypothetical cytosolic Protein         | Unknown                                | -                          | -                              | 65.57                     | -13.04                    | -28.55                    | -59.80                 | 1.86E-14        | <b>7.91E-06</b> | 4.53E-15          | <b>0.000225</b>   |
| SpM1_ChORF2215_s_at    | -            | <i>spy2215</i>                | Unknown                 | Hypothetical cytosolic Protein         | Unknown                                | -                          | -                              | 65.22                     | 2.33                      | -55.88                    | 5.48                   | 3.88E-11        | <b>7.91E-06</b> | 0.7380489         | 0.14127           |
| SpM1_ChORF1701_s_at    | -            | <i>spy1701</i>                | Unknown                 | Hypothetical membrane protein          | Unknown                                | -                          | -                              | 65.06                     | 2.15                      | -23.55                    | -19.80                 | 1.56E-10        | <b>7.91E-06</b> | 0.0036183         | 0.001115          |
| SpM1_ChORF0530_s_at    | <i>vicX</i>  | <i>spy0530</i>                | Unknown                 | Hypothetical protein                   | Unknown                                | -                          | -                              | 64.76                     | -31.90                    | -93.26                    | -55.75                 | 3.00E-07        | <b>7.91E-06</b> | 0.0005463         | <b>0.000297</b>   |
| SpM1_ChORF0649_s_at    | <i>dinG</i>  | <i>spy0649</i>                | DNA metabolism          | DNA replication, modification & repair | DNA replication, modification & repair | -                          | -                              | 64.75                     | 12.91                     | -32.98                    | -19.62                 | 1.19E-12        | <b>7.91E-06</b> | 0.0073671         | 0.002167          |
| SpM1_ChORF1988_s_at    | -            | <i>spy1988</i>                | Unknown                 | Hypothetical protein                   | Unknown                                | -                          | -                              | 64.72                     | 186.47                    | 159.49                    | 139.37                 | 3.02E-09        | <b>7.91E-06</b> | 1.10E-10          | <b>0.000225</b>   |
| SpM1_ChORF0543_s_at    | <i>mefE</i>  | <i>spy0543</i>                | Membrane transport      | Membrane transport                     | Unknown substrate membrane transport   | -                          | -                              | 64.68                     | 25.78                     | 13.34                     | -35.11                 | 8.14E-09        | <b>7.91E-06</b> | 2.01E-07          | <b>0.000225</b>   |
| SpM1_ChORF1987_s_at    | -            | <i>spy1987</i>                | Unknown                 | Hypothetical cytosolic Protein         | Unknown                                | -                          | -                              | 64.67                     | 71.50                     | 68.74                     | 82.64                  | 4.51E-05        | <b>7.96E-06</b> | 7.86E-10          | <b>0.000225</b>   |
| SpM1_ChORF1764_s_at    | -            | <i>spy1764</i>                | Cell envelope           | Cell wall                              | Peptidoglycan biosynthesis             | -                          | -                              | 63.87                     | 124.59                    | 89.96                     | -6.93                  | 1.46E-12        | <b>7.91E-06</b> | 0.3704153         | 0.077163          |
| SpM12_ChORF299-56_s_at | -            | <i>SpyoM12_Chr ORF_299_56</i> | Unknown                 | Hypothetical protein                   | Unknown                                | -                          | -                              | 63.80                     | -21.57                    | -23.89                    | -77.16                 | 1.27E-14        | <b>7.91E-06</b> | 5.54E-22          | <b>0.000225</b>   |
| SpM1_ChORF0010_s_at    | <i>divIC</i> | <i>spy0010</i>                | Cell shape and division | Cell shape & division                  | Cell division                          | Essential                  | Essential                      | 63.72                     | -45.84                    | -55.30                    | -38.04                 | 7.09E-21        | <b>7.91E-06</b> | 3.35E-08          | <b>0.000225</b>   |
| SpM1_ChORF0338_s_at    | -            | <i>spy0338</i>                | Unknown                 | Hypothetical protein                   | Unknown                                | -                          | -                              | 62.99                     | 5.42                      | -129.63                   | 129.44                 | 6.85E-07        | <b>7.91E-06</b> | 4.17E-07          | <b>0.000225</b>   |

| Probe Set Name*        | Gene Name         | Synonym                               | Category                | Subcategory                    | Function                             | <i>Bacillus subtilis</i> <sup>†</sup> | <i>Staphylococcus aureus</i> <sup>†</sup> | Difference Time (30 - 0) <sup>‡</sup> | Difference Time (60 - 0) <sup>‡</sup> | Difference Time (90 - 0) <sup>‡</sup> | Difference (Mut - WT) <sup>‡</sup> | P-value (Time) <sup>§</sup> | Q-value (Time) <sup>§</sup> | P-value (Strain) <sup>§</sup> | Q-value (Strain) <sup>§</sup> |
|------------------------|-------------------|---------------------------------------|-------------------------|--------------------------------|--------------------------------------|---------------------------------------|-------------------------------------------|---------------------------------------|---------------------------------------|---------------------------------------|------------------------------------|-----------------------------|-----------------------------|-------------------------------|-------------------------------|
| SpM1_ChORF0732_at      | -                 | <i>spy0732</i>                        | Unknown                 | Hypothetical Cytosolic Protein | Unknown                              | Essential                             | -                                         | 62.73                                 | 15.05                                 | 3.91                                  | 61.54                              | 2.62E-10                    | <b>7.91E-06</b>             | 5.53E-19                      | <b>0.000225</b>               |
| SpM12_ChORF299-58_s_at | -                 | <i>SpyoM12_Chr ORF_299_58</i>         | Unknown                 | Hypothetical protein           | Unknown                              | Essential                             | -                                         | 62.73                                 | -28.82                                | -32.78                                | -93.48                             | 2.78E-14                    | <b>7.91E-06</b>             | 7.29E-23                      | <b>0.000225</b>               |
| SpM1_ChORF1019_s_at    | -                 | <i>spy1019</i>                        | Membrane transport      | Membrane transport             | Unknown substrate membrane transport | -                                     | -                                         | 62.56                                 | 313.09                                | 114.94                                | -101.29                            | 3.79E-17                    | <b>7.91E-06</b>             | 6.49E-09                      | <b>0.000225</b>               |
| SpM1_ChORF2111_s_at    | -                 | <i>spy2111</i>                        | Unknown                 | Hypothetical protein           | Unknown                              | -                                     | -                                         | 62.55                                 | 37.77                                 | 105.89                                | -124.28                            | 0.1069611                   | 0.001282                    | 4.79E-05                      | <b>0.000225</b>               |
| SpM1_ChORF0212_s_at    | <i>speG</i>       | <i>spy0212</i>                        | Virulence               | Virulence interacting proteins | Pyrogenic Toxin Superantigen         | -                                     | Essential                                 | 62.40                                 | 3.13                                  | 7.32                                  | -3.01                              | 2.54E-17                    | <b>7.91E-06</b>             | 0.0022115                     | 0.000723                      |
| SpM5_ChORF275f-139_s_a | -                 | <i>SpyoM5_Chr ORF_275f02.p1cq_139</i> | Unknown                 | Hypothetical protein           | Unknown                              | -                                     | -                                         | 62.35                                 | -0.01                                 | -2.75                                 | -24.41                             | 5.56E-09                    | <b>7.91E-06</b>             | 9.30E-06                      | <b>0.000225</b>               |
| SpM1_ChORF1142_s_at    | <i>hemK</i>       | <i>spy1142</i>                        | Cofactors               | S-adenosylmethionine           | S-adenosylmethionine biosynthesis    | Essential                             | Essential                                 | 62.20                                 | -37.46                                | -128.17                               | -35.46                             | 3.13E-21                    | <b>7.91E-06</b>             | 0.0003033                     | <b>0.000253</b>               |
| SpM1_ChORF0850_s_at    | <i>trxB, yumC</i> | <i>spy0850</i>                        | Amino acid metabolism   | Amino acid catabolism          | Amino acid catabolism                | -                                     | -                                         | 62.07                                 | -68.92                                | -92.38                                | -65.84                             | 1.56E-19                    | <b>7.91E-06</b>             | 2.48E-10                      | <b>0.000225</b>               |
| SpM1_ChORF1047_s_at    | -                 | <i>spy1047</i>                        | Unknown                 | Hypothetical Cytosolic Protein | Unknown                              | -                                     | -                                         | 62.00                                 | 4.08                                  | 0.86                                  | -33.52                             | 7.85E-07                    | <b>7.91E-06</b>             | 4.90E-05                      | <b>0.000225</b>               |
| SpM1_ChORF0433_at      | -                 | <i>spy0433</i>                        | Unknown                 | Hypothetical Cytosolic Protein | Unknown                              | -                                     | -                                         | 61.92                                 | -51.44                                | -82.82                                | -15.04                             | 2.52E-16                    | <b>7.91E-06</b>             | 0.0450898                     | 0.011343                      |
| SpM1_ChORF1528_s_at    | -                 | <i>spy1528</i>                        | Unknown                 | Hypothetical protein           | Unknown                              | -                                     | -                                         | 61.85                                 | 392.71                                | 201.11                                | -68.08                             | 5.77E-15                    | <b>7.91E-06</b>             | 0.0050604                     | 0.001531                      |
| SpM1_ChORF0789_s_at    | <i>rgpCc</i>      | <i>spy0789</i>                        | Cell envelope           | Cell wall                      | Teichoic acid biosynthesis           | -                                     | -                                         | 61.74                                 | -31.54                                | -87.87                                | -6.94                              | 1.16E-19                    | <b>7.91E-06</b>             | 0.3892409                     | 0.080845                      |
| SpM1_ChORF1032_s_at    | <i>hylA</i>       | <i>spy1032</i>                        | Carbohydrate metabolism | Carbohydrate assimilation      | Carbohydrate assimilation            | -                                     | -                                         | 61.67                                 | 93.17                                 | 76.82                                 | -99.73                             | 0.0001443                   | <b>8.49E-06</b>             | 3.35E-09                      | <b>0.000225</b>               |
| SpM1_ChORF0930_s_at    | -                 | <i>spy0930</i>                        | Unknown                 | Hypothetical Cytosolic Protein | Unknown                              | -                                     | -                                         | 61.55                                 | -13.41                                | 29.53                                 | -46.18                             | 1.31E-05                    | <b>7.91E-06</b>             | 5.39E-06                      | <b>0.000225</b>               |
| SpM1_ChORF0107_s_at    | -                 | <i>spy0107</i>                        | Unknown                 | Hypothetical protein           | Unknown                              | Essential                             | -                                         | 61.54                                 | 10.32                                 | -3.36                                 | -10.10                             | 5.67E-11                    | <b>7.91E-06</b>             | 0.0117754                     | 0.003321                      |
| SpM1_ChORF1549_s_at    | <i>ahrC.2</i>     | <i>spy1549</i>                        | RNA metabolism          | Transcription r                | regulation                           | -                                     | -                                         | 61.53                                 | -65.53                                | -76.63                                | -8.68                              | 2.86E-13                    | <b>7.91E-06</b>             | 0.1928207                     | 0.042752                      |
| SpM1_ChORF0574_s_at    | <i>bglA</i>       | <i>spy0574</i>                        | Carbohydrate metabolism | Carbohydrate assimilation      | Carbohydrate assimilation            | -                                     | -                                         | 61.40                                 | 128.95                                | 194.83                                | -10.55                             | 0.0001409                   | <b>8.48E-06</b>             | 0.5469526                     | 0.109358                      |
| SpM1_ChORF1817_s_at    | <i>scrR</i>       | <i>spy1817</i>                        | RNA metabolism          | Transcription r                | regulation                           | -                                     | -                                         | 61.38                                 | -15.46                                | -35.07                                | -30.08                             | 8.84E-14                    | <b>7.91E-06</b>             | 2.30E-06                      | <b>0.000225</b>               |
| SpM1_ChORF0881_s_at    | <i>mvaS.2</i>     | <i>spy0881</i>                        | Cell envelope           | Membrane lipids                | Phospholipids biosynthesis           | -                                     | -                                         | 61.23                                 | -128.35                               | -169.52                               | -45.86                             | 3.55E-22                    | <b>7.91E-06</b>             | 0.0003015                     | <b>0.000252</b>               |
| SpM1_ChORF0163_s_at    | -                 | <i>spy0163</i>                        | Membrane transport      | Membrane transport             | Unknown substrate membrane transport | -                                     | -                                         | 61.08                                 | 29.23                                 | 30.25                                 | -172.49                            | 0.0384076                   | <b>0.000477</b>             | 1.93E-16                      | <b>0.000225</b>               |

| Probe Set Name*         | Gene Name   | Synonym                                   | Category                | Subcategory                     | Function                             | <i>Bacillus subtilis</i> <sup>†</sup> | <i>Staphylococcus aureus</i> <sup>†</sup> | Difference Time (30 - 0) <sup>‡</sup> | Difference Time (60 - 0) <sup>‡</sup> | Difference Time (90 - 0) <sup>‡</sup> | Difference (Mut - WT) <sup>‡</sup> | P-value (Time) <sup>§</sup> | Q-value (Time) <sup>§</sup> | P-value (Strain) <sup>§</sup> | Q-value (Strain) <sup>§</sup> |
|-------------------------|-------------|-------------------------------------------|-------------------------|---------------------------------|--------------------------------------|---------------------------------------|-------------------------------------------|---------------------------------------|---------------------------------------|---------------------------------------|------------------------------------|-----------------------------|-----------------------------|-------------------------------|-------------------------------|
| SpM1_ChORF0320_s_at     | -           | <i>spy0320</i>                            | Membrane transport      | Membrane transport              | Unknown substrate membrane transport | Essential                             | -                                         | 60.96                                 | 49.36                                 | 53.97                                 | -59.77                             | 0.0085767                   | <b>0.000111</b>             | 1.94E-05                      | <b>0.000225</b>               |
| SpM18_ChORF2199_s_at    | -           | <i>spyM18_2199</i>                        | Membrane transport      | Membrane transport              | Metal ion membrane transport         | -                                     | -                                         | 60.90                                 | 4.67                                  | -10.86                                | -34.01                             | 4.40E-06                    | <b>7.91E-06</b>             | 0.0001249                     | <b>0.000229</b>               |
| SpM1_ChORF0571_s_at     | <i>licT</i> | <i>spy0571</i>                            | RNA metabolism          | Basic transcription machinery   | Basic transcription machinery        | -                                     | -                                         | 60.78                                 | 51.33                                 | -5.71                                 | -21.30                             | 6.09E-05                    | <b>8.03E-06</b>             | 0.0320291                     | 0.008338                      |
| SpM1_ChORF0479_at       | -           | <i>spy0479</i>                            | Unknown                 | Hypothetical Cytosolic Protein  | Unknown                              | -                                     | -                                         | 60.73                                 | 34.05                                 | 103.61                                | -4.30                              | 3.71E-09                    | <b>7.91E-06</b>             | 0.5137942                     | 0.103712                      |
| SpM5_ChORF4P31a-19_s_at | -           | <i>SpyoM5_Chr ORF_4P31a0 1.w2c2309_19</i> | Unknown                 | Hypothetical protein            | Unknown                              | -                                     | -                                         | 60.68                                 | 23.23                                 | -31.89                                | 22.96                              | 7.44E-11                    | <b>7.91E-06</b>             | 0.0411555                     | 0.010405                      |
| SpM1_ChORF1670_s_at     | -           | <i>spy1666</i>                            | Unknown                 | Hypothetical protein            | Unknown                              | -                                     | -                                         | 60.58                                 | 66.38                                 | 44.83                                 | -26.18                             | 0.000178                    | <b>8.71E-06</b>             | 0.006536                      | 0.001937                      |
| SpM1_ChORF0208_s_at     | -           | <i>spy0208</i>                            | Unknown                 | Hypothetical protein            | Unknown                              | -                                     | -                                         | 60.53                                 | -96.67                                | -242.66                               | 0.28                               | 1.87E-17                    | <b>7.91E-06</b>             | 0.5941156                     | 0.117628                      |
| SpM1_ChORF1777_s_at     | <i>codY</i> | <i>spy1777</i>                            | RNA metabolism          | Transcription regulation        | Transcription regulation             | -                                     | -                                         | 60.05                                 | -198.44                               | -173.70                               | -35.94                             | 4.01E-11                    | <b>7.91E-06</b>             | 0.1281509                     | 0.029301                      |
| SpM1_ChORF1908_s_at     | <i>salR</i> | <i>spy1908</i>                            | RNA metabolism          | Transcription regulation        | Signal transduction                  | -                                     | -                                         | 59.98                                 | 1.28                                  | 30.10                                 | -58.54                             | 1.06E-07                    | <b>7.91E-06</b>             | 4.49E-12                      | <b>0.000225</b>               |
| SpM1_ChORF1176_s_at     | -           | <i>spy1176</i>                            | Carbohydrate metabolism | Carbohydrate central metabolism | Carbohydrate central metabolism      | -                                     | -                                         | 59.58                                 | -34.09                                | -52.67                                | -64.52                             | 6.72E-16                    | <b>7.91E-06</b>             | 9.49E-13                      | <b>0.000225</b>               |
| SpM1_ChORF0459_s_at     | -           | <i>spy0459</i>                            | Unknown                 | Hypothetical protein            | Unknown                              | -                                     | -                                         | 59.49                                 | -15.53                                | -23.11                                | -74.64                             | 1.28E-07                    | <b>7.91E-06</b>             | 3.92E-12                      | <b>0.000225</b>               |
| SpM1_ChORF1152_s_at     | <i>gyrA</i> | <i>spy1152</i>                            | DNA metabolism          | Packaging & segregation         | DNA packaging                        | -                                     | -                                         | 59.45                                 | -522.71                               | -423.73                               | -152.62                            | 7.28E-12                    | <b>7.91E-06</b>             | 0.0006395                     | <b>0.000315</b>               |
| SpM18_ChORF1977_at      | -           | <i>spyM18_1977</i>                        | Unknown                 | Hypothetical protein            | Unknown                              | -                                     | -                                         | 59.22                                 | -0.11                                 | 3.13                                  | -43.53                             | 0.0018116                   | <b>2.51E-05</b>             | 0.0003416                     | <b>0.000259</b>               |
| SpM1_ChORF1247_s_at     | -           | <i>spy1247</i>                            | RNA metabolism          | Transcription regulation        | Transcription regulation             | -                                     | -                                         | 59.12                                 | -135.72                               | -237.50                               | 381.19                             | 9.71E-09                    | <b>7.91E-06</b>             | 2.09E-18                      | <b>0.000225</b>               |
| SpM1_ChORF1243_s_at     | <i>pstC</i> | <i>spy1243</i>                            | Membrane transport      | Membrane transport              | Ion membrane transport               | -                                     | -                                         | 59.00                                 | 13.94                                 | -100.79                               | 191.28                             | 1.46E-10                    | <b>7.91E-06</b>             | 2.38E-20                      | <b>0.000225</b>               |
| SpM1_ChORF0312_s_at     | -           | <i>spy0312</i>                            | Unknown                 | Hypothetical protein            | Unknown                              | -                                     | -                                         | 58.02                                 | -43.02                                | -71.16                                | -83.21                             | 6.48E-18                    | <b>7.91E-06</b>             | 6.37E-17                      | <b>0.000225</b>               |
| SpM1_ChORF0524_s_at     | -           | <i>spy0524</i>                            | Unknown                 | Hypothetical protein            | Unknown                              | -                                     | -                                         | 57.98                                 | 4.60                                  | -6.29                                 | -13.96                             | 1.09E-08                    | <b>7.91E-06</b>             | 0.0126381                     | 0.003553                      |
| SpM1_ChORF0480_at       | -           | <i>spy0480</i>                            | Unknown                 | Hypothetical Cytosolic Protein  | Unknown                              | -                                     | -                                         | 57.89                                 | 32.19                                 | 58.21                                 | -15.30                             | 1.25E-07                    | <b>7.91E-06</b>             | 0.0120426                     | 0.003394                      |
| SpM1_ChORF0568_s_at     | -           | <i>spy0568</i>                            | Unknown                 | Hypothetical protein            | Unknown                              | -                                     | -                                         | 57.62                                 | 203.52                                | 99.26                                 | -16.02                             | 5.36E-09                    | <b>7.91E-06</b>             | 0.264106                      | 0.05656                       |
| SpM18_ChORF1305_s_at    | -           | <i>spyM18_1305</i>                        | Phage                   | Phage proteins                  | Phage proteins                       | -                                     | -                                         | 57.16                                 | 71.98                                 | 51.35                                 | -21.58                             | 4.37E-06                    | <b>7.91E-06</b>             | 0.0162552                     | 0.004502                      |
| SpM1_ChORF2163_s_at     | <i>cadC</i> | <i>spy2163</i>                            | RNA metabolism          | Transcription regulation        | Transcription regulation             | Essential                             | -                                         | 57.11                                 | 4.41                                  | -7.61                                 | -32.42                             | 1.04E-05                    | <b>7.91E-06</b>             | 9.43E-05                      | <b>0.000226</b>               |
| SpM1_ChORF1569_s_at     | -           | <i>spy1569</i>                            | Stress adaptation       | Heat shock proteins             | Heat shock proteins                  | -                                     | -                                         | 57.07                                 | -112.23                               | -86.61                                | -2.15                              | 7.30E-16                    | <b>7.91E-06</b>             | 0.8961562                     | 0.165842                      |
| SpM1_ChORF1024_s_at     | -           | <i>spy1024</i>                            | Unknown                 | Hypothetical protein            | Unknown                              | Essential                             | Essential                                 | 56.98                                 | 83.98                                 | 54.53                                 | -56.88                             | 3.55E-11                    | <b>7.91E-06</b>             | 5.77E-12                      | <b>0.000225</b>               |



| Probe Set Name*        | Gene Name   | Synonym                       | Category                | Subcategory                     | Function                        | <i>Bacillus subtilis</i> <sup>†</sup> | <i>Staphylococcus aureus</i> <sup>†</sup> | Difference Time (30 - 0) <sup>‡</sup> | Difference Time (60 - 0) <sup>‡</sup> | Difference Time (90 - 0) <sup>‡</sup> | Difference (Mut - WT) <sup>‡</sup> | P-value (Time) <sup>§</sup> | Q-value (Time) <sup>§</sup> | P-value (Strain) <sup>§</sup> | Q-value (Strain) <sup>§</sup> |
|------------------------|-------------|-------------------------------|-------------------------|---------------------------------|---------------------------------|---------------------------------------|-------------------------------------------|---------------------------------------|---------------------------------------|---------------------------------------|------------------------------------|-----------------------------|-----------------------------|-------------------------------|-------------------------------|
| SpM1_ChORF1906_s_at    | <i>hsdM</i> | <i>spy1906</i>                | DNA metabolism          | DNA restriction, methylation    | DNA restriction, methylation    | -                                     | -                                         | 56.96                                 | 131.14                                | 108.05                                | -120.10                            | 1.22E-11                    | <b>7.91E-06</b>             | 2.03E-16                      | <b>0.000225</b>               |
| SpM1_ChORF1864_s_at    | <i>dnaQ</i> | <i>spy1864</i>                | DNA metabolism          | Basic replication machinery     | DNA replication                 | -                                     | -                                         | 56.67                                 | -17.25                                | 4.99                                  | -22.29                             | 2.58E-05                    | <b>7.91E-06</b>             | 0.0938281                     | 0.022137                      |
| SpM1_ChORF0827_s_at    | -           | <i>spy0827</i>                | Unknown                 | Hypothetical protein            | Unknown                         | -                                     | -                                         | 56.65                                 | -67.91                                | -94.11                                | -55.58                             | 3.40E-08                    | <b>7.91E-06</b>             | 6.03E-05                      | <b>0.000225</b>               |
| SpM1_ChORF1294_s_at    | <i>malE</i> | <i>spy1294</i>                | Membrane transport      | Membrane transport              | Carbohydrate membrane transport | -                                     | -                                         | 56.37                                 | 2941.80                               | 2603.45                               | 954.37                             | 1.83E-30                    | <b>7.91E-06</b>             | 1.41E-12                      | <b>0.000225</b>               |
| SpM1_ChORF0715_at      | -           | <i>spy0715</i>                | RNA metabolism          | Transcription regulation        | Unknown                         | -                                     | -                                         | 56.36                                 | 94.75                                 | -2.97                                 | 398.19                             | 0.0004549                   | <b>1.08E-05</b>             | 4.56E-39                      | <b>0.000225</b>               |
| SpM1_ChORF1161_at      | -           | <i>spy1161</i>                | Other                   | GTP-binding protein             | GTP-binding                     | -                                     | -                                         | 56.29                                 | -14.73                                | 12.70                                 | -13.86                             | 6.76E-08                    | <b>7.91E-06</b>             | 0.0733262                     | 0.017602                      |
| SpM1_ChORF1178_s_at    | <i>citG</i> | <i>spy1178</i>                | Carbohydrate metabolism | Carbohydrate central metabolism | Carbohydrate central metabolism | -                                     | -                                         | 56.26                                 | 57.60                                 | 107.68                                | 75.57                              | 5.61E-10                    | <b>7.91E-06</b>             | 6.06E-11                      | <b>0.000225</b>               |
| SpM1_ChORF0154_s_at    | <i>ntpA</i> | <i>spy0154</i>                | Membrane transport      | Membrane transport              | Ion membrane transport          | -                                     | -                                         | 56.04                                 | 33.21                                 | 62.86                                 | 4.99                               | 4.03E-05                    | <b>7.95E-06</b>             | 0.8577431                     | 0.159913                      |
| SpM12_ChORF299-54_s_at | -           | <i>SpyoM12_Chr ORF_299_54</i> | Unknown                 | Hypothetical protein            | Unknown                         | -                                     | -                                         | 55.97                                 | -27.32                                | -31.83                                | -82.74                             | 4.84E-15                    | <b>7.91E-06</b>             | 3.24E-23                      | <b>0.000225</b>               |
| SpM1_ChORF1065_at      | -           | <i>spy1065</i>                | Unknown                 | Hypothetical protein            | Unknown                         | -                                     | -                                         | 55.93                                 | 11.26                                 | -12.47                                | -64.35                             | 6.62E-09                    | <b>7.91E-06</b>             | 2.94E-14                      | <b>0.000225</b>               |
| SpM1_ChORF1998_at      | <i>smeZ</i> | <i>spy1998</i>                | Virulence               | Virulence interacting proteins  | Pyrogenic Toxin Superantigen    | -                                     | -                                         | 55.87                                 | 3.49                                  | -38.30                                | -100.02                            | 5.82E-07                    | <b>7.91E-06</b>             | 3.34E-14                      | <b>0.000225</b>               |
| SpM1_ChORF2049_s_at    | <i>pfID</i> | <i>spy2049</i>                | Carbohydrate metabolism | Carbohydrate assimilation       | Carbohydrate assimilation       | -                                     | -                                         | 55.82                                 | 2404.13                               | 2629.35                               | 865.42                             | 3.31E-31                    | <b>7.91E-06</b>             | 8.12E-13                      | <b>0.000225</b>               |
| SpM1_ChORF0155_s_at    | <i>ntpB</i> | <i>spy0155</i>                | Membrane transport      | Membrane transport              | Ion membrane transport          | -                                     | -                                         | 55.56                                 | 45.38                                 | 114.49                                | 1.75                               | 1.65E-08                    | <b>7.91E-06</b>             | 0.965297                      | 0.17696                       |
| SpM1_ChORF2166_s_at    | -           | <i>spy2166</i>                | Phage                   | Phage proteins                  | Unknown                         | -                                     | -                                         | 55.45                                 | 57.51                                 | 97.06                                 | -75.47                             | 4.41E-07                    | <b>7.91E-06</b>             | 8.10E-09                      | <b>0.000225</b>               |
| SpM18_ChORF0633_s_at   | -           | <i>spyM18_0633</i>            | Phage                   | Phage proteins                  | Phage structural proteins       | -                                     | -                                         | 55.37                                 | 4.37                                  | -26.35                                | -54.75                             | 7.51E-06                    | <b>7.91E-06</b>             | 1.48E-06                      | <b>0.000225</b>               |
| SpM1_ChORF0639_s_at    | <i>kgdA</i> | <i>spy0639</i>                | Carbohydrate metabolism | Carbohydrate assimilation       | Carbohydrate assimilation       | -                                     | -                                         | 55.25                                 | 9.29                                  | 4.27                                  | -14.50                             | 0.0002278                   | <b>9.05E-06</b>             | 0.0750299                     | 0.01797                       |
| SpM3_ChORF0976_s_at    | -           | <i>SpyM3_0976</i>             | Unknown                 | Hypothetical protein            | Unknown                         | -                                     | -                                         | 54.93                                 | 67.49                                 | 52.58                                 | -19.68                             | 2.50E-07                    | <b>7.91E-06</b>             | 0.0091215                     | 0.002632                      |
| SpM1_ChORF1161_s_at    | -           | <i>spyM18_1121</i>            | Other                   | GTP-binding protein             | GTP-binding                     | -                                     | -                                         | 54.82                                 | -31.98                                | 75.38                                 | 72.49                              | 2.53E-05                    | <b>7.91E-06</b>             | 1.55E-05                      | <b>0.000225</b>               |
| SpM1_ChORF1575_s_at    | -           | <i>spy1575</i>                | Unknown                 | Hypothetical protein            | Unknown                         | -                                     | -                                         | 54.13                                 | -56.28                                | -58.89                                | 9.29                               | 2.71E-16                    | <b>7.91E-06</b>             | 0.2396989                     | 0.05187                       |
| SpM1_ChORF0191_at      | -           | <i>spy0191</i>                | Unknown                 | Hypothetical protein            | Unknown                         | -                                     | -                                         | 53.96                                 | 11.76                                 | 63.72                                 | -24.14                             | 1.17E-08                    | <b>7.91E-06</b>             | 0.0018772                     | 0.000627                      |
| SpM18_ChORF1309_s_at   | -           | <i>spyM18_1309</i>            | Phage                   | Phage proteins                  | Unknown                         | -                                     | -                                         | 53.49                                 | 41.68                                 | 101.70                                | -41.29                             | 1.59E-10                    | <b>7.91E-06</b>             | 8.77E-06                      | <b>0.000225</b>               |
| SpM1_ChORF1788_s_at    | -           | <i>spy1788</i>                | Membrane transport      | Membrane transport              | Metal ion membrane transport    | -                                     | -                                         | 53.30                                 | -20.39                                | -73.79                                | -79.48                             | 4.21E-11                    | <b>7.91E-06</b>             | 3.46E-10                      | <b>0.000225</b>               |
| SpM1_ChORF1586_s_at    | <i>lacZ</i> | <i>spy1586</i>                | Carbohydrate metabolism | Carbohydrate assimilation       | Carbohydrate assimilation       | -                                     | -                                         | 52.69                                 | 303.10                                | 476.26                                | 254.49                             | 2.55E-25                    | <b>7.91E-06</b>             | 8.01E-19                      | <b>0.000225</b>               |

| Probe Set Name*        | Gene Name     | Synonym                    | Category               | Subcategory                            | Function                               | <i>Bacillus subtilis</i> † | <i>Staphylococcus aureus</i> † | Difference Time (30 - 0)‡ | Difference Time (60 - 0)‡ | Difference Time (90 - 0)‡ | Difference (Mut - WT)‡ | P-value (Time)§ | Q-value (Time)§ | P-value (Strain)§ | Q-value (Strain)§ |
|------------------------|---------------|----------------------------|------------------------|----------------------------------------|----------------------------------------|----------------------------|--------------------------------|---------------------------|---------------------------|---------------------------|------------------------|-----------------|-----------------|-------------------|-------------------|
| SpM1_ChORF2002_s_at    | <i>dppC</i>   | <i>spy2002</i>             | Membrane transport     | Membrane transport                     | Peptide membrane transport             | -                          | -                              | 52.64                     | 51.36                     | 98.75                     | -301.42                | 5.61E-05        | <b>8.01E-06</b> | 1.16E-32          | <b>0.000225</b>   |
| SpM1_ChORF1257_s_at    | -             | <i>spy1257</i>             | Membrane transport     | Membrane transport                     | Unknown substrate membrane transport   | -                          | -                              | 52.59                     | 2.04                      | -1.13                     | -2.77                  | 1.85E-09        | <b>7.91E-06</b> | 0.5035206         | 0.101813          |
| SpM1_ChORF0856_s_at    | <i>mur1.1</i> | <i>spy0856</i>             | Cell envelope          | Cell wall                              | Peptidoglycan biosynthesis             | Essential                  | -                              | 52.43                     | -4.57                     | -28.25                    | -12.24                 | 9.10E-10        | <b>7.91E-06</b> | 0.0370439         | 0.009495          |
| SpM12_ChORF277-20_s_at | -             | <i>spy0537</i>             | Unknown                | Hypothetical protein                   | Unknown                                | -                          | -                              | 52.30                     | 5.77                      | 0.34                      | -22.08                 | 1.71E-15        | <b>7.91E-06</b> | 3.26E-13          | <b>0.000225</b>   |
| SpM1_ChORF0916_s_at    | -             | <i>spy0916</i>             | Unknown                | Hypothetical protein                   | Unknown                                | -                          | -                              | 52.11                     | 56.38                     | 329.33                    | -11.62                 | 2.32E-07        | <b>7.91E-06</b> | 0.8407281         | 0.157576          |
| SpM1_ChORF0847_s_at    | -             | <i>spy0847</i>             | RNA metabolism         | RNA modification                       | RNA modification                       | -                          | -                              | 52.06                     | -0.69                     | 15.74                     | 2.63                   | 8.30E-19        | <b>7.91E-06</b> | 2.20E-05          | <b>0.000225</b>   |
| SpM3_ChORF1072_s_at    | -             | <i>spy1407</i>             | Unknown                | Hypothetical protein                   | Unknown                                | -                          | -                              | 52.05                     | -5.15                     | -6.92                     | -2.56                  | 6.49E-06        | <b>7.91E-06</b> | 0.471258          | 0.095841          |
| SpM1_ChORF1422_s_at    | <i>recR</i>   | <i>spy1422</i>             | DNA metabolism         | DNA replication, modification & repair | DNA replication, modification & repair | -                          | -                              | 52.00                     | -57.13                    | -57.29                    | 76.53                  | 6.83E-12        | <b>7.91E-06</b> | 2.10E-11          | <b>0.000225</b>   |
| SpM1_ChORF1254_s_at    | -             | <i>spy1254</i>             | Unknown                | Hypothetical Cytosolic Protein         | Unknown                                | Essential                  | -                              | 51.87                     | 13.79                     | 50.69                     | -12.15                 | 5.06E-05        | <b>7.98E-06</b> | 0.2210263         | 0.048156          |
| SpM1_ChORF0743_s_at    | <i>sagF</i>   | <i>spy0743</i>             | Protein synthesis      | Protein folding & modification         | Protein modification                   | -                          | -                              | 51.85                     | 1297.11                   | 1906.25                   | 1364.48                | 3.28E-29        | <b>7.91E-06</b> | 4.94E-28          | <b>0.000225</b>   |
| SpM18_ChORF0544_s_at   | -             | <i>spyM18_0544</i>         | Unknown                | Hypothetical protein                   | Unknown                                | -                          | -                              | 51.75                     | -0.95                     | -3.97                     | -26.07                 | 1.23E-12        | <b>7.91E-06</b> | 8.22E-08          | <b>0.000225</b>   |
| SpM1_ChORF0517_s_at    | <i>thrS</i>   | <i>spy0517</i>             | Protein synthesis      | tRNA synthetases                       | tRNA synthetase                        | Essential                  | Essential                      | 51.65                     | -118.66                   | -99.34                    | -113.57                | 0.0254793       | <b>0.000321</b> | 0.1038135         | 0.024209          |
| SpM1_ChORF1834_s_at    | -             | <i>spy1834</i>             | RNA metabolism         | Transcription regulation               | Unknown                                | -                          | -                              | 51.62                     | -4.38                     | -10.37                    | -41.51                 | 7.29E-09        | <b>7.91E-06</b> | 1.10E-10          | <b>0.000225</b>   |
| SpM1_ChORF0009_s_at    | -             | <i>spy0009</i>             | Stress adaptation      | Heat shock proteins                    | Heat shock proteins                    | -                          | -                              | 51.59                     | -63.33                    | -88.54                    | -60.72                 | 8.46E-15        | <b>7.91E-06</b> | 3.33E-08          | <b>0.000225</b>   |
| SpM1_ChORF1367_s_at    | -             | <i>spy1367</i>             | Unknown                | Hypothetical protein                   | Unknown                                | Essential                  | Essential                      | 51.57                     | -0.42                     | 6.58                      | -4.36                  | 1.22E-10        | <b>7.91E-06</b> | 0.0715413         | 0.017244          |
| SpM1_ChORF1898_s_at    | -             | <i>spy1898</i>             | RNA metabolism         | Transcription regulation               | Unknown                                | -                          | -                              | 50.81                     | -68.30                    | -166.20                   | 19.92                  | 1.54E-25        | <b>7.91E-06</b> | 0.1787764         | 0.039714          |
| SpM1_ChORF1163_s_at    | <i>smf</i>    | <i>spy1163</i>             | DNA metabolism         | Packaging & segregation                | DNA packaging                          | -                          | -                              | 50.44                     | -19.07                    | -36.19                    | -4.93                  | 1.47E-08        | <b>7.91E-06</b> | 0.5012785         | 0.101418          |
| SpM12_ChORF286-3_s_at  | -             | <i>SpyoM12_ChORF_286_3</i> | Unknown                | Hypothetical protein                   | Unknown                                | -                          | -                              | 50.42                     | 15.75                     | -66.86                    | -114.85                | 7.53E-07        | <b>7.91E-06</b> | 1.02E-11          | <b>0.000225</b>   |
| SpM1_ChORF2189_s_at    | <i>sdhB</i>   | <i>spy2189</i>             | Amino acid metabolism  | Amino acid catabolism                  | Amino acid catabolism                  | -                          | -                              | 49.89                     | 430.20                    | 246.30                    | 125.82                 | 8.59E-25        | <b>7.91E-06</b> | 3.58E-10          | <b>0.000225</b>   |
| SpM1_ChORF0055_s_at    | <i>rplV</i>   | <i>spy0055</i>             | Protein synthesis      | Ribosomal proteins                     | Ribosomal protein                      | -                          | -                              | 49.35                     | -180.91                   | -397.11                   | -162.97                | 3.76E-08        | <b>7.91E-06</b> | 0.010278          | 0.002935          |
| SpM12_ChORF248-6_s_at  | -             | <i>SpyoM12_ChORF_248_6</i> | Unknown                | Hypothetical protein                   | Unknown                                | Essential                  | Essential                      | 49.33                     | 918.51                    | 1166.76                   | 176.00                 | 1.33E-11        | <b>7.91E-06</b> | 0.1020992         | 0.023825          |
| SpM1_ChORF0723_at      | -             | <i>spy0723</i>             | Mobile Genetic Element | Mobile Genetic Element                 | Transposase                            | -                          | -                              | 49.07                     | -21.16                    | -26.99                    | -32.41                 | 5.43E-09        | <b>7.91E-06</b> | 3.77E-05          | <b>0.000225</b>   |
| SpM12_ChORF262-5_s_at  | -             | <i>SpyoM12_ChORF_262_5</i> | Unknown                | Hypothetical protein                   | Unknown                                | -                          | -                              | 48.95                     | 475.94                    | 370.16                    | 716.07                 | 4.11E-17        | <b>7.91E-06</b> | 1.45E-33          | <b>0.000225</b>   |
| SpM12_ChORF260-3_s_at  | -             | <i>SpyoM12_ChORF_260_3</i> | Unknown                | Hypothetical protein                   | Unknown                                | Essential                  | Essential                      | 48.88                     | 1.36                      | -1.03                     | -10.56                 | 7.42E-11        | <b>7.91E-06</b> | 0.00108           | <b>0.000415</b>   |

| Probe Set Name*        | Gene Name   | Synonym                             | Category                | Subcategory                            | Function                               | <i>Bacillus subtilis</i> <sup>†</sup> | <i>Staphylococcus aureus</i> <sup>†</sup> | Difference Time (30 - 0) <sup>‡</sup> | Difference Time (60 - 0) <sup>‡</sup> | Difference Time (90 - 0) <sup>‡</sup> | Difference (Mut - WT) <sup>‡</sup> | P-value (Time) <sup>§</sup> | Q-value (Time) <sup>§</sup> | P-value (Strain) <sup>§</sup> | Q-value (Strain) <sup>§</sup> |
|------------------------|-------------|-------------------------------------|-------------------------|----------------------------------------|----------------------------------------|---------------------------------------|-------------------------------------------|---------------------------------------|---------------------------------------|---------------------------------------|------------------------------------|-----------------------------|-----------------------------|-------------------------------|-------------------------------|
| SpM1_ChORF0931_s_at    | -           | <i>spy0931</i>                      | Unknown                 | Hypothetical Cytosolic Protein         | Unknown                                | -                                     | -                                         | 48.70                                 | -41.33                                | -5.59                                 | -58.31                             | 0.0045235                   | <b>5.96E-05</b>             | 5.93E-05                      | <b>0.000225</b>               |
| SpM1_ChORF0846_s_at    | -           | <i>spy0846</i>                      | RNA metabolism          | Transcription regulation               |                                        | -                                     | -                                         | 48.35                                 | 1.54                                  | 15.38                                 | -1.59                              | 1.80E-13                    | <b>7.91E-06</b>             | 3.31E-05                      | <b>0.000225</b>               |
| SpM1_ChORF1013_s_at    | <i>fbp</i>  | <i>spy1013</i>                      | Virulence               | Virulence interacting proteins         | Cell surface protein                   | -                                     | -                                         | 48.27                                 | -8.38                                 | -81.30                                | -70.66                             | 1.57E-10                    | <b>7.91E-06</b>             | 2.59E-08                      | <b>0.000225</b>               |
| SpM1_ChORF1177_s_at    | -           | <i>spy1177</i>                      | Carbohydrate metabolism | Carbohydrate central metabolism        | Carbohydrate central metabolism        | -                                     | -                                         | 48.20                                 | -28.47                                | -82.28                                | -63.84                             | 3.33E-18                    | <b>7.91E-06</b>             | 4.12E-11                      | <b>0.000225</b>               |
| SpM1_ChORF0845_s_at    | <i>czcD</i> | <i>spy0845</i>                      | Membrane transport      | Membrane transport                     | Metal ion membrane transport           | -                                     | -                                         | 47.96                                 | 29.85                                 | -4.91                                 | -11.18                             | 9.36E-15                    | <b>7.91E-06</b>             | 0.0231249                     | 0.006242                      |
| SpM1_ChORF1879_s_at    | -           | <i>spy1879</i>                      | Unknown                 | Hypothetical protein                   | Unknown                                | -                                     | -                                         | 47.90                                 | -68.16                                | -98.15                                | -21.14                             | 8.20E-20                    | <b>7.91E-06</b>             | 0.0082049                     | 0.0024                        |
| SpM1_ChORF0173_s_at    | <i>leuS</i> | <i>spy0173</i>                      | Protein synthesis       | tRNA synthetases                       | tRNA synthetase                        | -                                     | -                                         | 47.73                                 | -29.02                                | -146.37                               | -221.48                            | 2.13E-10                    | <b>7.91E-06</b>             | 4.62E-19                      | <b>0.000225</b>               |
| SpM1_ChORF0540_s_at    | -           | <i>spy0540</i>                      | Unknown                 | Hypothetical protein                   | Unknown                                | -                                     | -                                         | 47.12                                 | 4.52                                  | -0.02                                 | -21.71                             | 1.23E-11                    | <b>7.91E-06</b>             | 1.12E-10                      | <b>0.000225</b>               |
| SpM1_ChORF1361_s_at    | <i>inlA</i> | <i>spy1361</i>                      | Virulence               | Virulence interacting proteins         | Cell surface protein                   | -                                     | -                                         | 46.06                                 | -22.12                                | -17.15                                | -9.46                              | 8.86E-07                    | <b>7.91E-06</b>             | 0.2995536                     | 0.063455                      |
| SpM49_ChORF6658-6_s_at | -           | <i>SpyoM49_ChORF_sp001_0_6658_6</i> | Unknown                 | Hypothetical protein                   | Unknown                                | -                                     | -                                         | 45.66                                 | -12.34                                | -17.59                                | -11.88                             | 2.75E-10                    | <b>7.91E-06</b>             | 0.0347647                     | 0.008962                      |
| SpM12_ChORF291-52_s_at | -           | <i>SpyoM12_ChORF_291_52</i>         | Unknown                 | Hypothetical protein                   | Unknown                                | -                                     | -                                         | 44.96                                 | 0.00                                  | 10.40                                 | 2.68                               | 2.00E-12                    | <b>7.91E-06</b>             | 0.2183452                     | 0.047838                      |
| SpM1_ChORF1049_s_at    | -           | <i>spy1049</i>                      | Unknown                 | Hypothetical Cytosolic Protein         | Unknown                                | -                                     | -                                         | 44.93                                 | -9.55                                 | -8.49                                 | -29.66                             | 3.32E-07                    | <b>7.91E-06</b>             | 8.09E-06                      | <b>0.000225</b>               |
| SpM1_ChORF1846_s_at    | <i>dinP</i> | <i>spy1846</i>                      | DNA metabolism          | DNA replication, modification & repair | DNA replication, modification & repair | -                                     | -                                         | 44.83                                 | -71.98                                | -99.63                                | -40.90                             | 8.34E-15                    | <b>7.91E-06</b>             | 0.0001535                     | <b>0.000231</b>               |
| SpM1_ChORF1536_s_at    | -           | <i>spy1536</i>                      | Unknown                 | Hypothetical protein                   | Unknown                                | -                                     | -                                         | 44.72                                 | -630.43                               | -876.55                               | 302.75                             | 1.18E-17                    | <b>7.91E-06</b>             | 0.0001806                     | <b>0.000234</b>               |
| SpM1_ChORF1935_s_at    | -           | <i>spy1935</i>                      | Unknown                 | Hypothetical protein                   | Unknown                                | -                                     | -                                         | 44.57                                 | -5.80                                 | 10.87                                 | -52.76                             | 9.02E-05                    | <b>8.18E-06</b>             | 3.34E-10                      | <b>0.000225</b>               |
| SpM12_ChORF274-19_s_at | -           | <i>SpyoM12_ChORF_274_19</i>         | Unknown                 | Hypothetical protein                   | Unknown                                | -                                     | -                                         | 44.40                                 | -111.34                               | -101.15                               | 79.50                              | 8.84E-05                    | <b>8.18E-06</b>             | 0.003122                      | 0.000978                      |
| SpM1_ChORF1904_s_at    | <i>hsdR</i> | <i>spy1904</i>                      | DNA metabolism          | DNA restriction, methylation           | DNA restriction, methylation           | -                                     | -                                         | 44.21                                 | 158.04                                | 85.72                                 | -101.14                            | 9.62E-09                    | <b>7.91E-06</b>             | 2.29E-09                      | <b>0.000225</b>               |
| SpM12_ChORF288-15_at   | -           | <i>SpyoM12_ChORF_288_15</i>         | Unknown                 | Hypothetical protein                   | Unknown                                | -                                     | -                                         | 44.18                                 | -1.78                                 | -5.01                                 | -23.21                             | 5.78E-06                    | <b>7.91E-06</b>             | 0.0001442                     | <b>0.00023</b>                |
| SpM12_ChORF217-1_at    | -           | <i>SpyoM12_ChORF_217_1</i>          | Unknown                 | Hypothetical protein                   | Unknown                                | -                                     | -                                         | 44.04                                 | 9.63                                  | -36.60                                | -128.55                            | 2.75E-05                    | <b>7.91E-06</b>             | 2.82E-16                      | <b>0.000225</b>               |
| SpM18_ChORF0631_s_at   | -           | <i>spyM18_0631</i>                  | Unknown                 | Hypothetical protein                   | Unknown                                | -                                     | -                                         | 43.80                                 | 16.22                                 | -18.54                                | -82.32                             | 0.0016886                   | <b>2.37E-05</b>             | 7.97E-10                      | <b>0.000225</b>               |

| Probe Set Name*        | Gene Name    | Synonym                     | Category                | Subcategory                    | Function                          | <i>Bacillus subtilis</i> <sup>†</sup> | <i>Staphylococcus aureus</i> <sup>†</sup> | Difference Time (30 - 0) <sup>‡</sup> | Difference Time (60 - 0) <sup>‡</sup> | Difference Time (90 - 0) <sup>‡</sup> | Difference (Mut - WT) <sup>‡</sup> | P-value (Time) <sup>§</sup> | Q-value (Time) <sup>§</sup> | P-value (Strain) <sup>§</sup> | Q-value (Strain) <sup>§</sup> |
|------------------------|--------------|-----------------------------|-------------------------|--------------------------------|-----------------------------------|---------------------------------------|-------------------------------------------|---------------------------------------|---------------------------------------|---------------------------------------|------------------------------------|-----------------------------|-----------------------------|-------------------------------|-------------------------------|
| SpM1_ChORF1616_s_at    | <i>comFA</i> | <i>spy1616</i>              | Membrane transport      | Membrane transport             | Quorum sensing membrane transport | -                                     | -                                         | 43.75                                 | -9.48                                 | -6.00                                 | -21.59                             | 2.53E-08                    | <b>7.91E-06</b>             | 0.0002595                     | <b>0.000246</b>               |
| SpM1_ChORF1622_s_at    | <i>hk03</i>  | <i>spy1622</i>              | RNA metabolism          | Transcription regulation       | Signal transduction               | -                                     | -                                         | 43.67                                 | 143.04                                | 42.87                                 | -13.03                             | 2.22E-10                    | <b>7.91E-06</b>             | 0.129916                      | 0.029628                      |
| SpM1_ChORF2198_s_at    | -            | <i>spy2198</i>              | Unknown                 | Hypothetical cytosolic Protein | Unknown                           | -                                     | -                                         | 43.59                                 | -141.92                               | -195.91                               | -30.98                             | 9.23E-25                    | <b>7.91E-06</b>             | 0.0087839                     | 0.002547                      |
| SpM1_ChORF0039_s_at    | -            | <i>spy0039</i>              | RNA metabolism          | Transcription regulation       | Signal transduction               | Essential                             | -                                         | 43.28                                 | 45.76                                 | 46.25                                 | 27.35                              | 0.0126307                   | <b>0.000162</b>             | 0.0225638                     | 0.0061                        |
| SpM1_ChORF0102_s_at    | <i>comYB</i> | <i>spy0102</i>              | Membrane transport      | Membrane transport             | Quorum sensing membrane transport | -                                     | -                                         | 43.24                                 | -1.56                                 | -5.43                                 | -5.14                              | 3.38E-11                    | <b>7.91E-06</b>             | 0.0156485                     | 0.00434                       |
| SpM12_ChORF299-49_s_at | -            | <i>SpyoM12_ChORF_299_49</i> | Unknown                 | Hypothetical protein           | Unknown                           | -                                     | -                                         | 43.23                                 | 1.04                                  | 0.83                                  | -28.52                             | 4.80E-12                    | <b>7.91E-06</b>             | 1.57E-17                      | <b>0.000225</b>               |
| SpM1_ChORF0195_x_at    | -            | <i>spy0195</i>              | Mobile Genetic Element  | Mobile Genetic Element         | Transposase                       | -                                     | -                                         | 43.22                                 | 17.29                                 | 11.16                                 | -30.68                             | 0.0006865                   | <b>1.28E-05</b>             | 5.59E-05                      | <b>0.000225</b>               |
| SpM1_ChORF1905_s_at    | <i>hsdS</i>  | <i>spy1905</i>              | DNA metabolism          | DNA restriction, methylation   | DNA restriction, methylation      | -                                     | -                                         | 43.09                                 | 26.85                                 | -4.13                                 | -81.34                             | 6.54E-06                    | <b>7.91E-06</b>             | 4.92E-17                      | <b>0.000225</b>               |
| SpM1_ChORF0766_s_at    | <i>endA</i>  | <i>spy0766</i>              | Virulence               | Virulence interacting proteins | Lantibiotic, Quorum sensing       | -                                     | -                                         | 43.06                                 | -1.81                                 | -12.65                                | -8.83                              | 6.48E-10                    | <b>7.91E-06</b>             | 0.0364966                     | 0.009381                      |
| SpM1_ChORF0310_s_at    | -            | <i>spy0310</i>              | Unknown                 | Hypothetical Cytosolic Protein | Unknown                           | -                                     | -                                         | 42.93                                 | -37.82                                | -24.91                                | -82.35                             | 2.02E-06                    | <b>7.91E-06</b>             | 2.32E-12                      | <b>0.000225</b>               |
| SpM1_ChORF1205_s_at    | -            | <i>spy1205</i>              | Cell envelope           | Cell wall                      | Peptidoglycan biosynthesis        | -                                     | -                                         | 42.87                                 | -26.34                                | -24.61                                | -34.69                             | 4.77E-07                    | <b>7.91E-06</b>             | 0.0001027                     | <b>0.000227</b>               |
| SpM1_ChORF2152_s_at    | -            | <i>spy2152</i>              | Unknown                 | Hypothetical protein           | Unknown                           | -                                     | -                                         | 42.84                                 | 34.71                                 | -5.72                                 | -11.31                             | 0.000274                    | <b>9.36E-06</b>             | 0.1841409                     | 0.040854                      |
| SpM1_ChORF1404_s_at    | -            | <i>spy1404</i>              | Unknown                 | Hypothetical cytosolic Protein | Unknown                           | Essential                             | Essential                                 | 42.67                                 | -89.28                                | -133.06                               | 447.15                             | 9.83E-06                    | <b>7.91E-06</b>             | 8.55E-27                      | <b>0.000225</b>               |
| SpM1_ChORF1901_s_at    | <i>truA</i>  | <i>spy1901</i>              | RNA metabolism          | RNA modification               | RNA modification                  | -                                     | -                                         | 42.45                                 | -65.91                                | -171.17                               | 47.58                              | 6.47E-17                    | <b>7.91E-06</b>             | 0.0017954                     | 0.000605                      |
| SpM1_ChORF0489_s_at    | -            | <i>spy0489</i>              | Unknown                 | Hypothetical Cytosolic Protein | Unknown                           | -                                     | -                                         | 42.24                                 | -10.79                                | -27.41                                | -35.45                             | 1.23E-08                    | <b>7.91E-06</b>             | 3.11E-06                      | <b>0.000225</b>               |
| SpM1_ChORF0636_s_at    | <i>idnO</i>  | <i>spy0636</i>              | Carbohydrate metabolism | Carbohydrate assimilation      | Carbohydrate assimilation         | -                                     | -                                         | 42.04                                 | 27.56                                 | 24.54                                 | 4.10                               | 2.79E-05                    | <b>7.91E-06</b>             | 0.6915457                     | 0.133826                      |
| SpM18_ChORF0135_s_at   | -            | <i>spyM18_0135</i>          | RNA metabolism          | Transcription regulation       | Unknown                           | -                                     | -                                         | 41.88                                 | 536.52                                | 250.86                                | 139.12                             | 1.67E-15                    | <b>7.91E-06</b>             | 0.0001025                     | <b>0.000227</b>               |
| SpM1_ChORF0101_s_at    | <i>comYA</i> | <i>spy0101</i>              | Membrane transport      | Membrane transport             | Quorum sensing membrane transport | -                                     | -                                         | 41.84                                 | -1.00                                 | -5.68                                 | -1.94                              | 1.42E-12                    | <b>7.91E-06</b>             | 0.1672473                     | 0.037365                      |
| SpM1_ChORF2170_at      | -            | <i>spy2170</i>              | Phage                   | Phage proteins                 | Hypothetical cytosolic protein    | -                                     | -                                         | 41.79                                 | -21.33                                | -35.26                                | -17.90                             | 1.98E-15                    | <b>7.91E-06</b>             | 0.000547                      | <b>0.000297</b>               |
| SpM1_ChORF0285_s_at    | -            | <i>spy0285</i>              | Cofactors               | Fe-sulfate cluster             | Fe-sulfate cluster biosynthesis   | -                                     | -                                         | 41.60                                 | -211.17                               | -243.33                               | -41.72                             | 5.12E-14                    | <b>7.91E-06</b>             | 0.0578971                     | 0.014248                      |

| Probe Set Name*      | Gene Name   | Synonym                       | Category                | Subcategory                            | Function                               | <i>Bacillus subtilis</i> <sup>†</sup> | <i>Staphylococcus aureus</i> <sup>†</sup> | Difference Time (30 - 0) <sup>‡</sup> | Difference Time (60 - 0) <sup>‡</sup> | Difference Time (90 - 0) <sup>‡</sup> | Difference (Mut - WT) <sup>‡</sup> | P-value (Time) <sup>§</sup> | Q-value (Time) <sup>§</sup> | P-value (Strain) <sup>§</sup> | Q-value (Strain) <sup>§</sup> |
|----------------------|-------------|-------------------------------|-------------------------|----------------------------------------|----------------------------------------|---------------------------------------|-------------------------------------------|---------------------------------------|---------------------------------------|---------------------------------------|------------------------------------|-----------------------------|-----------------------------|-------------------------------|-------------------------------|
| SpM1_ChORF0722_s_at  | -           | <i>spy0722</i>                | Unknown                 | Hypothetical Cytosolic Protein         | Unknown                                | -                                     | -                                         | 41.38                                 | -10.43                                | 16.90                                 | -42.68                             | 0.0063405                   | <b>8.26E-05</b>             | 8.96E-05                      | <b>0.000226</b>               |
| SpM1_ChORF0798_s_at  | -           | <i>spy0798</i>                | Unknown                 | Hypothetical protein                   | Unknown                                | -                                     | -                                         | 40.71                                 | 8.83                                  | -31.86                                | -29.49                             | 0.0002243                   | <b>9.02E-06</b>             | 0.0128991                     | 0.003621                      |
| SpM1_ChORF1505_s_at  | <i>phr</i>  | <i>spy1505</i>                | DNA metabolism          | DNA replication, modification & repair | DNA replication, modification & repair | -                                     | -                                         | 40.71                                 | 5.60                                  | -6.66                                 | -38.97                             | 3.88E-05                    | <b>7.95E-06</b>             | 1.08E-07                      | <b>0.000225</b>               |
| M12_1091_at          | -           | <i>M12_1091</i>               | Mobile Genetic Element  | Mobile Genetic Element                 | IS Element-associated ORF              | -                                     | -                                         | 40.54                                 | -1.36                                 | 11.74                                 | 2.33                               | 1.66E-12                    | <b>7.91E-06</b>             | 0.4079517                     | 0.084234                      |
| SpM12_ChORF301-33_at | -           | <i>SpyoM12_Chr ORF_301_33</i> | Unknown                 | Hypothetical protein                   | Unknown                                | -                                     | -                                         | 40.05                                 | 12.64                                 | 5.08                                  | -18.04                             | 0.0006145                   | <b>1.22E-05</b>             | 0.0026206                     | 0.000835                      |
| SpM1_ChORF1525_s_at  | <i>murD</i> | <i>spy1525</i>                | Cell envelope           | Cell wall                              | Peptidoglycan biosynthesis             | -                                     | -                                         | 39.93                                 | 146.36                                | 50.16                                 | -109.43                            | 4.84E-06                    | <b>7.91E-06</b>             | 2.09E-07                      | <b>0.000225</b>               |
| SpM1_ChORF1198_s_at  | -           | <i>spy1198</i>                | Phage                   | Phage proteins                         | Phage regulatory proteins              | -                                     | -                                         | 39.90                                 | 41.46                                 | 160.17                                | -47.51                             | 1.86E-15                    | <b>7.91E-06</b>             | 2.27E-05                      | <b>0.000225</b>               |
| SpM1_ChORF1765_s_at  | -           | <i>spy1765</i>                | Cell envelope           | Cell wall                              | Peptidoglycan biosynthesis             | -                                     | -                                         | 39.83                                 | 254.83                                | 206.96                                | 58.74                              | 3.14E-19                    | <b>7.91E-06</b>             | 0.0002812                     | <b>0.000249</b>               |
| SpM1_ChORF0471_s_at  | <i>phoH</i> | <i>spy0471</i>                | Unknown                 | Hypothetical protein                   | Unknown                                | -                                     | -                                         | 39.76                                 | -20.90                                | -123.94                               | 123.15                             | 1.73E-07                    | <b>7.91E-06</b>             | 4.92E-08                      | <b>0.000225</b>               |
| SpM1_ChORF0815_s_at  | -           | <i>spy0815</i>                | Unknown                 | Hypothetical protein                   | Unknown                                | -                                     | -                                         | 39.44                                 | -96.63                                | -168.57                               | -63.91                             | 6.24E-26                    | <b>7.91E-06</b>             | 2.07E-09                      | <b>0.000225</b>               |
| SpM1_ChORF0013_s_at  | -           | <i>spy0013</i>                | Unknown                 | Conserved protein                      | Unknown                                | -                                     | -                                         | 39.32                                 | -35.85                                | -70.64                                | -84.45                             | 1.40E-11                    | <b>7.91E-06</b>             | 4.92E-14                      | <b>0.000225</b>               |
| SpM1_ChORF0600_s_at  | -           | <i>spy0600</i>                | Membrane transport      | Membrane transport                     | Unknown substrate membrane transport   | -                                     | -                                         | 39.30                                 | 9.68                                  | 43.57                                 | -33.92                             | 0.0028448                   | <b>3.81E-05</b>             | 0.0004485                     | <b>0.00028</b>                |
| SpM1_ChORF1697_s_at  | -           | <i>spy1697</i>                | Unknown                 | Hypothetical cytosolic Protein         | Unknown                                | -                                     | -                                         | 39.02                                 | -62.14                                | -45.37                                | -113.14                            | 4.57E-06                    | <b>7.91E-06</b>             | 2.34E-14                      | <b>0.000225</b>               |
| SpM18_ChORF0626_s_at | -           | <i>spy0560</i>                | Unknown                 | Hypothetical protein                   | Unknown                                | -                                     | -                                         | 39.02                                 | -3.43                                 | -38.42                                | -67.25                             | 1.92E-08                    | <b>7.91E-06</b>             | 6.57E-13                      | <b>0.000225</b>               |
| SpM1_ChORF1246_s_at  | -           | <i>spy1246</i>                | DNA metabolism          | Packaging & segregation                | DNA packaging                          | -                                     | -                                         | 38.81                                 | -19.70                                | -86.06                                | 63.28                              | 2.84E-12                    | <b>7.91E-06</b>             | 7.16E-09                      | <b>0.000225</b>               |
| SpM18_ChORF0120_s_at | -           | <i>spyM18_0120</i>            | Unknown                 | Hypothetical protein                   | Unknown                                | -                                     | -                                         | 38.46                                 | 7.68                                  | 8.78                                  | 3.57                               | 9.91E-10                    | <b>7.91E-06</b>             | 0.2358015                     | 0.051058                      |
| SpM1_ChORF0157_s_at  | <i>ntpD</i> | <i>spy0157</i>                | Membrane transport      | Membrane transport                     | Ion membrane transport                 | -                                     | -                                         | 38.25                                 | 14.84                                 | 57.48                                 | -0.47                              | 3.26E-06                    | <b>7.91E-06</b>             | 0.7213404                     | 0.138828                      |
| SpM1_ChORF1552_s_at  | -           | <i>spy1552</i>                | Unknown                 | Hypothetical cytosolic Protein         | Unknown                                | -                                     | -                                         | 38.03                                 | 40.81                                 | 65.92                                 | -32.52                             | 5.40E-06                    | <b>7.91E-06</b>             | 3.54E-05                      | <b>0.000225</b>               |
| SpM1_ChORF1899_s_at  | -           | <i>spy1899</i>                | Unknown                 | Hypothetical membrane protein          | Unknown                                | -                                     | -                                         | 37.60                                 | -74.16                                | -169.55                               | 15.88                              | 5.72E-20                    | <b>7.91E-06</b>             | 0.4117197                     | 0.084862                      |
| SpM1_ChORF1110_s_at  | -           | <i>spy1110</i>                | Carbohydrate metabolism | Carbohydrate central metabolism        | Carbohydrate central metabolism        | -                                     | -                                         | 37.44                                 | -15.62                                | -23.00                                | -0.45                              | 1.08E-09                    | <b>7.91E-06</b>             | 0.7604277                     | 0.144922                      |
| SpM1_ChORF1641_s_at  | -           | <i>spy1641</i>                | Membrane transport      | Membrane transport                     | Carbohydrate membrane transport        | -                                     | -                                         | 37.43                                 | 13.40                                 | -12.25                                | -54.33                             | 1.55E-05                    | <b>7.91E-06</b>             | 3.28E-11                      | <b>0.000225</b>               |

| Probe Set Name*        | Gene Name   | Synonym                     | Category                | Subcategory                            | Function                               | <i>Bacillus subtilis</i> <sup>†</sup> | <i>Staphylococcus aureus</i> <sup>†</sup> | Difference Time (30 - 0) <sup>‡</sup> | Difference Time (60 - 0) <sup>‡</sup> | Difference Time (90 - 0) <sup>‡</sup> | Difference (Mut - WT) <sup>‡</sup> | P-value (Time) <sup>§</sup> | Q-value (Time) <sup>§</sup> | P-value (Strain) <sup>§</sup> | Q-value (Strain) <sup>§</sup> |
|------------------------|-------------|-----------------------------|-------------------------|----------------------------------------|----------------------------------------|---------------------------------------|-------------------------------------------|---------------------------------------|---------------------------------------|---------------------------------------|------------------------------------|-----------------------------|-----------------------------|-------------------------------|-------------------------------|
| SpM3_ChORF1070_s_at    | -           | <i>SpyM3_1070</i>           | Unknown                 | Hypothetical protein                   | Unknown                                | -                                     | -                                         | 37.24                                 | -72.00                                | -147.54                               | 289.78                             | 2.32E-08                    | <b>7.91E-06</b>             | 2.00E-21                      | <b>0.000225</b>               |
| SpM1_ChORF0637_s_at    | -           | <i>spy0637</i>              | Unknown                 | Hypothetical Cytosolic Protein         | Unknown                                | -                                     | -                                         | 37.07                                 | 13.57                                 | 4.95                                  | -6.27                              | 2.12E-05                    | <b>7.91E-06</b>             | 0.1015912                     | 0.023722                      |
| SpM1_ChORF2048_s_at    | <i>mipB</i> | <i>spy2048</i>              | Carbohydrate metabolism | Carbohydrate biosynthesis              |                                        | -                                     | -                                         | 36.96                                 | 1361.88                               | 2001.23                               | 473.07                             | 2.61E-33                    | <b>7.91E-06</b>             | 5.36E-11                      | <b>0.000225</b>               |
| SpM1_ChORF0581_s_at    | -           | <i>spy0581</i>              | Unknown                 | Hypothetical protein                   | Unknown                                | -                                     | -                                         | 36.32                                 | 34.65                                 | 100.34                                | -36.71                             | 4.62E-11                    | <b>7.91E-06</b>             | 0.0001035                     | <b>0.000227</b>               |
| SpM18_ChORF1331_s_at   | -           | <i>spyM18_1331</i>          | Membrane transport      | Membrane transport                     | Carbohydrate membrane transport        | -                                     | -                                         | 36.28                                 | 46.82                                 | 130.83                                | 0.84                               | 2.14E-09                    | <b>7.91E-06</b>             | 0.7997307                     | 0.151508                      |
| SpM1_ChORF1119_s_at    | -           | <i>spy1119</i>              | Unknown                 | Hypothetical Cytosolic Protein         | Unknown                                | -                                     | -                                         | 36.02                                 | -40.31                                | 56.81                                 | -48.04                             | 0.0716731                   | 0.00087                     | 0.0050436                     | 0.001527                      |
| SpM1_ChORF1584_s_at    | <i>aroE</i> | <i>spy1584</i>              | Amino acid metabolism   | Amino acid biosynthesis                | Amino acid biosynthesis                | -                                     | -                                         | 35.67                                 | 30.38                                 | 73.84                                 | 64.86                              | 0.0312931                   | <b>0.000392</b>             | 0.0004908                     | <b>0.000288</b>               |
| SpM3_ChORF0973_at      | -           | <i>SpyM3_0973</i>           | Unknown                 | Hypothetical protein                   | Unknown                                | -                                     | -                                         | 35.52                                 | 36.49                                 | 64.60                                 | -35.17                             | 0.0005322                   | <b>1.15E-05</b>             | 0.0027405                     | 0.000869                      |
| SpM1_ChORF0628_at      | -           | <i>spy0628</i>              | Unknown                 | Hypothetical protein                   | Unknown                                | -                                     | -                                         | 35.36                                 | 12.39                                 | -18.88                                | 1.56                               | 9.65E-09                    | <b>7.91E-06</b>             | 0.9714142                     | 0.177896                      |
| SpM12_ChORF295-17_s_at | -           | <i>SpyoM12_ChORF_295_17</i> | Unknown                 | Hypothetical protein                   | Unknown                                | -                                     | Essential                                 | 35.28                                 | -17.49                                | -16.02                                | -9.92                              | 1.23E-12                    | <b>7.91E-06</b>             | 0.0101885                     | 0.002913                      |
| SpM1_ChORF1405_s_at    | -           | <i>spy1405</i>              | Unknown                 | Hypothetical protein                   | Unknown                                | -                                     | -                                         | 35.12                                 | -72.93                                | -152.26                               | 287.45                             | 5.89E-09                    | <b>7.91E-06</b>             | 9.02E-22                      | <b>0.000225</b>               |
| SpM1_ChORF0397_s_at    | -           | <i>spy0397</i>              | Unknown                 | Hypothetical protein                   | Unknown                                | -                                     | -                                         | 34.91                                 | -77.95                                | -24.12                                | -19.35                             | 0.1740813                   | 0.002058                    | 0.8344796                     | 0.156705                      |
| SpM1_ChORF0314_s_at    | -           | <i>spy0314</i>              | Unknown                 | Hypothetical Cytosolic Protein         | Unknown                                | -                                     | -                                         | 34.74                                 | -65.26                                | -84.64                                | -98.96                             | 4.73E-13                    | <b>7.91E-06</b>             | 8.98E-15                      | <b>0.000225</b>               |
| SpM1_ChORF0151_s_at    | <i>ntpC</i> | <i>spy0151</i>              | Membrane transport      | Membrane transport                     | Ion membrane transport                 | -                                     | -                                         | 33.79                                 | 39.13                                 | 78.50                                 | 21.07                              | 8.02E-06                    | <b>7.91E-06</b>             | 0.0537707                     | 0.013336                      |
| SpM12_ChORF270-2_s_at  | -           | <i>spy0408</i>              | Unknown                 | Hypothetical protein                   | Unknown                                | -                                     | -                                         | 33.28                                 | 28.89                                 | 77.35                                 | -7.80                              | 0.0009956                   | <b>1.59E-05</b>             | 0.7490402                     | 0.143062                      |
| SpM1_ChORF1769_s_at    | -           | <i>spy1769</i>              | Unknown                 | Hypothetical protein                   | Unknown                                | -                                     | -                                         | 33.21                                 | -22.76                                | -17.24                                | -22.50                             | 3.85E-06                    | <b>7.91E-06</b>             | 0.006228                      | 0.001852                      |
| SpM1_ChORF0526_s_at    | -           | <i>spy0526</i>              | Cell envelope           | Membrane lipids                        | Fatty acid biosynthesis                | -                                     | -                                         | 33.21                                 | 13.25                                 | 25.12                                 | -14.25                             | 6.06E-06                    | <b>7.91E-06</b>             | 0.0022103                     | 0.000723                      |
| SpM1_ChORF1804_s_at    | <i>acpS</i> | <i>spy1804</i>              | Cell envelope           | Membrane lipids                        | Fatty acid biosynthesis                | -                                     | -                                         | 32.89                                 | 6.52                                  | 54.07                                 | -72.18                             | 0.0004557                   | <b>1.08E-05</b>             | 5.15E-11                      | <b>0.000225</b>               |
| SpM1_ChORF1589_s_at    | -           | <i>spy1589</i>              | Unknown                 | Hypothetical cytosolic Protein         | Unknown                                | -                                     | -                                         | 32.87                                 | 11.05                                 | 8.08                                  | 27.33                              | 6.81E-05                    | <b>8.07E-06</b>             | 2.62E-06                      | <b>0.000225</b>               |
| SpM12_ChORF212-4_s_at  | -           | <i>SpyoM12_ChORF_212_4</i>  | Unknown                 | Hypothetical protein                   | Unknown                                | -                                     | -                                         | 32.65                                 | -41.96                                | -56.90                                | -0.65                              | 2.35E-07                    | <b>7.91E-06</b>             | 0.6845674                     | 0.132769                      |
| SpM1_ChORF1833_s_at    | <i>mutY</i> | <i>spy1833</i>              | DNA metabolism          | DNA replication, modification & repair | DNA replication, modification & repair | -                                     | -                                         | 32.62                                 | -220.60                               | -228.83                               | -25.68                             | 6.07E-20                    | <b>7.91E-06</b>             | 0.0307237                     | 0.008052                      |
| SpM1_ChORF1121_s_at    | -           | <i>spy1121</i>              | Unknown                 | Hypothetical Cytosolic Protein         | Unknown                                | Essential                             | -                                         | 32.61                                 | -30.05                                | -70.77                                | -21.03                             | 0.0018382                   | <b>2.54E-05</b>             | 0.13564                       | 0.030773                      |
| SpM1_ChORF1056_s_at    | -           | <i>spy1056</i>              | Unknown                 | Hypothetical membrane protein          | Unknown                                | -                                     | -                                         | 32.51                                 | -42.18                                | -27.23                                | -44.17                             | 0.0023257                   | <b>3.15E-05</b>             | 0.0016786                     | <b>0.000574</b>               |

| Probe Set Name*        | Gene Name     | Synonym                       | Category                | Subcategory                        | Function                             | <i>Bacillus subtilis</i> <sup>†</sup> | <i>Staphylococcus aureus</i> <sup>†</sup> | Difference Time (30 - 0) <sup>‡</sup> | Difference Time (60 - 0) <sup>‡</sup> | Difference Time (90 - 0) <sup>‡</sup> | Difference (Mut - WT) <sup>‡</sup> | P-value (Time) <sup>§</sup> | Q-value (Time) <sup>§</sup> | P-value (Strain) <sup>§</sup> | Q-value (Strain) <sup>§</sup> |
|------------------------|---------------|-------------------------------|-------------------------|------------------------------------|--------------------------------------|---------------------------------------|-------------------------------------------|---------------------------------------|---------------------------------------|---------------------------------------|------------------------------------|-----------------------------|-----------------------------|-------------------------------|-------------------------------|
| SpM1_ChORF1385_s_at    | -             | <i>spy1385</i>                | Unknown                 | Hypothetical protein               | Unknown                              | -                                     | -                                         | 32.47                                 | 100.26                                | 160.34                                | 58.82                              | 1.05E-09                    | <b>7.91E-06</b>             | 3.16E-05                      | <b>0.000225</b>               |
| SpM1_ChORF0521_s_at    | -             | <i>spy0521</i>                | Membrane transport      | Membrane transport                 | Unknown substrate membrane transport | -                                     | -                                         | 32.40                                 | 35.47                                 | 38.54                                 | -19.61                             | 0.0001203                   | <b>8.35E-06</b>             | 0.0144523                     | 0.004037                      |
| SpM1_ChORF1039_s_at    | -             | <i>spy1039</i>                | Unknown                 | Hypothetical Cytosolic Protein     | Unknown                              | -                                     | Essential                                 | 32.27                                 | -58.01                                | -93.31                                | -26.18                             | 1.18E-26                    | <b>7.91E-06</b>             | 0.0001004                     | <b>0.000227</b>               |
| SpM3_ChORF1086_at      | -             | <i>SpyM3_1086</i>             | Unknown                 | Hypothetical protein               | Unknown                              | -                                     | -                                         | 32.23                                 | -54.91                                | -42.16                                | 73.69                              | 4.90E-06                    | <b>7.91E-06</b>             | 6.71E-09                      | <b>0.000225</b>               |
| SpM1_ChORF1835_s_at    | <i>trx</i>    | <i>spy1835</i>                | Amino acid metabolism   | Amino acid catabolism              | Amino acid catabolism                | -                                     | -                                         | 32.05                                 | -55.03                                | -128.84                               | -46.07                             | 2.42E-16                    | <b>7.91E-06</b>             | 2.72E-05                      | <b>0.000225</b>               |
| SpM1_ChORF0609_s_at    | <i>ftsW</i>   | <i>spy0609</i>                | Cell shape and division | Cell shape & division              | Cell division                        | -                                     | -                                         | 31.97                                 | -144.19                               | -137.74                               | -19.77                             | 4.76E-19                    | <b>7.91E-06</b>             | 0.1262899                     | 0.028932                      |
| SpM1_ChORF0371_s_at    | -             | <i>spy0371</i>                | RNA metabolism          | RNA modification                   | RNA modification                     | Essential                             | -                                         | 31.95                                 | -5.33                                 | -19.96                                | -65.37                             | 0.0074826                   | <b>9.71E-05</b>             | 4.96E-09                      | <b>0.000225</b>               |
| SpM1_ChORF0257_s_at    | <i>nanH</i>   | <i>spy0257</i>                | Cell envelope           | Cell wall                          | Peptidoglycan biosynthesis           | -                                     | -                                         | 31.67                                 | 168.60                                | 692.93                                | 195.09                             | 5.82E-15                    | <b>7.91E-06</b>             | 8.72E-06                      | <b>0.000225</b>               |
| SpM12_ChORF280-25_s_at | -             | <i>SpyoM12_Chr ORF_280_25</i> | Unknown                 | Hypothetical protein               | Unknown                              | -                                     | -                                         | 31.66                                 | 6.11                                  | 10.20                                 | -4.07                              | 0.0023918                   | <b>3.23E-05</b>             | 0.5491207                     | 0.109708                      |
| SpM1_ChORF1535_s_at    | -             | <i>spy1535</i>                | RNA metabolism          | Transcription r egulation          | Transcription r egulation            | -                                     | -                                         | 31.50                                 | 118.44                                | 19.96                                 | 93.77                              | 3.80E-05                    | <b>7.95E-06</b>             | 2.87E-07                      | <b>0.000225</b>               |
| SpM1_ChORF1811_s_at    | <i>scrK</i>   | <i>spy1811</i>                | Carbohydrate metabolism | Carbohydrate assimilation          | Carbohydrate assimilation            | -                                     | -                                         | 30.94                                 | -26.38                                | 40.13                                 | -8.95                              | 6.07E-07                    | <b>7.91E-06</b>             | 0.2565822                     | 0.055184                      |
| SpM1_ChORF1556_s_at    | -             | <i>spy1556</i>                | RNA metabolism          | Transcription r egulation          | Signal transduction                  | -                                     | -                                         | 30.91                                 | 68.24                                 | 15.88                                 | -7.62                              | 5.72E-05                    | <b>8.01E-06</b>             | 0.2189226                     | 0.047875                      |
| SpM1_ChORF0728_s_at    | -             | <i>spy0728</i>                | Unknown                 | Hypothetical extracellular protein | Unknown                              | Essential                             | -                                         | 30.81                                 | 9.88                                  | 175.04                                | -118.97                            | 0.058933                    | 0.000723                    | 0.0382744                     | 0.009789                      |
| SpM1_ChORF0603_s_at    | -             | <i>spy0603</i>                | Unknown                 | Hypothetical extracellular protein | Unknown                              | -                                     | -                                         | 30.68                                 | -129.35                               | -212.68                               | -6.03                              | 3.03E-19                    | <b>7.91E-06</b>             | 0.4578963                     | 0.09372                       |
| SpM1_ChORF1984_s_at    | <i>nrdI.1</i> | <i>spy1984</i>                | Nucleotides             | Nucleotides biosynthesis           | Purine, pyrimidine biosynthesis      | -                                     | -                                         | 30.54                                 | -155.16                               | -173.34                               | -79.81                             | 5.02E-16                    | <b>7.91E-06</b>             | 1.58E-06                      | <b>0.000225</b>               |
| SpM1_ChORF2176_s_at    | -             | <i>spy2176</i>                | Phage                   | Phage proteins                     | Phage regulatory proteins            | -                                     | -                                         | 30.42                                 | -35.22                                | 1.38                                  | -48.86                             | 0.0003295                   | <b>9.79E-06</b>             | 6.17E-06                      | <b>0.000225</b>               |
| SpyM3_1764_at          | -             | <i>SpyM3_1764</i>             | Unknown                 | Hypothetical protein               | Unknown                              | -                                     | -                                         | 30.41                                 | -28.47                                | -5.03                                 | 0.35                               | 0.0004004                   | <b>1.04E-05</b>             | 0.8237215                     | 0.155383                      |
| SpM1_ChORF0235_s_at    | -             | <i>spy0235</i>                | Nucleotides             | Nucleotides biosynthesis           | Pyrimidine biosynthesis              | -                                     | -                                         | 30.40                                 | -155.03                               | -100.83                               | -33.59                             | 0.000663                    | <b>1.26E-05</b>             | 0.2699655                     | 0.057709                      |
| SpM1_ChORF1420_s_at    | <i>murF</i>   | <i>spy1420</i>                | Cell envelope           | Cell wall                          | Peptidoglycan biosynthesis           | -                                     | -                                         | 30.23                                 | -130.24                               | -76.13                                | 254.13                             | 6.24E-08                    | <b>7.91E-06</b>             | 2.73E-21                      | <b>0.000225</b>               |
| SpM1_ChORF1618_s_at    | <i>cysM</i>   | <i>spy1618</i>                | Amino acid metabolism   | Amino acid biosynthesis            | Amino acid biosynthesis              | -                                     | -                                         | 30.22                                 | -43.16                                | -67.86                                | -23.59                             | 7.02E-11                    | <b>7.91E-06</b>             | 0.0033059                     | 0.001032                      |
| SpM1_ChORF0237_s_at    | -             | <i>spy0237</i>                | Unknown                 | Hypothetical protein               | Unknown                              | -                                     | -                                         | 29.48                                 | -69.66                                | -116.76                               | -17.93                             | 7.18E-19                    | <b>7.91E-06</b>             | 0.0168854                     | 0.004665                      |
| SpM1_ChORF0642_s_at    | -             | <i>spy0642</i>                | Unknown                 | Hypothetical protein               | Unknown                              | -                                     | -                                         | 29.13                                 | -37.61                                | -104.55                               | 135.57                             | 3.49E-13                    | <b>7.91E-06</b>             | 1.55E-19                      | <b>0.000225</b>               |
| SpM3_ChORF0972_at      | -             | <i>SpyM3_0972</i>             | Unknown                 | Hypothetical protein               | Unknown                              | -                                     | -                                         | 29.04                                 | 20.13                                 | 77.09                                 | -68.55                             | 1.68E-05                    | <b>7.91E-06</b>             | 7.14E-09                      | <b>0.000225</b>               |
| SpyM3_1542_at          | -             | <i>SpyM3_1542</i>             | Unknown                 | Hypothetical protein               | Unknown                              | -                                     | -                                         | 28.97                                 | 71.87                                 | 112.43                                | -7.95                              | 3.20E-09                    | <b>7.91E-06</b>             | 0.9037349                     | 0.166893                      |

| Probe Set Name*         | Gene Name    | Synonym                             | Category           | Subcategory                    | Function                          | <i>Bacillus subtilis</i> <sup>†</sup> | <i>Staphylococcus aureus</i> <sup>†</sup> | Difference Time (30 - 0) <sup>‡</sup> | Difference Time (60 - 0) <sup>‡</sup> | Difference Time (90 - 0) <sup>‡</sup> | Difference (Mut - WT) <sup>‡</sup> | P-value (Time) <sup>§</sup> | Q-value (Time) <sup>§</sup> | P-value (Strain) <sup>§</sup> | Q-value (Strain) <sup>§</sup> |
|-------------------------|--------------|-------------------------------------|--------------------|--------------------------------|-----------------------------------|---------------------------------------|-------------------------------------------|---------------------------------------|---------------------------------------|---------------------------------------|------------------------------------|-----------------------------|-----------------------------|-------------------------------|-------------------------------|
| SpM18_ChORF1476_s_at    | -            | <i>spyM18_1476</i>                  | Phage              | Phage proteins                 |                                   | -                                     | -                                         | 28.96                                 | 0.99                                  | 9.09                                  | -8.17                              | 5.91E-15                    | <b>7.91E-06</b>             | 9.51E-19                      | <b>0.000225</b>               |
| SpM18_ChORF1122_s_at    | -            | <i>spy1162</i>                      | RNA metabolism     | RNA modification               | RNA modification                  | -                                     | -                                         | 28.93                                 | -18.49                                | 47.62                                 | -6.75                              | 0.0006965                   | <b>1.29E-05</b>             | 0.9537616                     | 0.17512                       |
| SpM12_ChORF301-71_s_at  | -            | <i>SpyoM12_Chr ORF_301_71</i>       | Unknown            | Hypothetical protein           | Unknown                           | -                                     | -                                         | 28.90                                 | 0.04                                  | 22.53                                 | -10.24                             | 0.0001748                   | <b>8.70E-06</b>             | 0.0478949                     | 0.011954                      |
| SpM1_ChORF2050_s_at     | -            | <i>spyM18_2111</i>                  | Membrane transport | Membrane transport             | Carbohydrate membrane transport   | -                                     | -                                         | 28.73                                 | 95.00                                 | 161.94                                | -13.75                             | 6.86E-12                    | <b>7.91E-06</b>             | 0.1945595                     | 0.043084                      |
| SpM1_ChORF1170_s_at     | <i>ddh</i>   | <i>spy1170</i>                      | Unknown            | Hypothetical protein           | Unknown                           | -                                     | -                                         | 28.35                                 | -36.05                                | -15.89                                | -40.03                             | 5.68E-06                    | <b>7.91E-06</b>             | 1.14E-05                      | <b>0.000225</b>               |
| SpM1_ChORF0640_s_at     | -            | <i>spy0640</i>                      | Unknown            | Hypothetical protein           | Unknown                           | -                                     | -                                         | 28.01                                 | -12.76                                | -54.39                                | 15.24                              | 1.99E-06                    | <b>7.91E-06</b>             | 0.1947482                     | 0.043098                      |
| SpM1_ChORF0463_s_at     | <i>rrf</i>   | <i>spy0463</i>                      | Protein synthesis  | Translation factors            | Translation factor                | -                                     | -                                         | 27.90                                 | -113.30                               | -110.89                               | -98.34                             | 5.32E-08                    | <b>7.91E-06</b>             | 3.54E-08                      | <b>0.000225</b>               |
| SpM1_ChORF0254_s_at     | -            | <i>spy0254</i>                      | Membrane transport | Membrane transport             | Carbohydrate membrane transport   | -                                     | -                                         | 27.38                                 | 308.40                                | 593.59                                | 260.17                             | 1.41E-14                    | <b>7.91E-06</b>             | 1.45E-08                      | <b>0.000225</b>               |
| SpM1_ChORF0790_s_at     | <i>rgpDc</i> | <i>spy0790</i>                      | Cell envelope      | Cell wall                      | Teichoic acid biosynthesis        | -                                     | -                                         | 27.19                                 | -93.18                                | -218.92                               | 18.98                              | 2.44E-12                    | <b>7.91E-06</b>             | 0.4629358                     | 0.094371                      |
| SpM12_ChORF282-20_s_at  | -            | <i>SpyoM12_Chr ORF_282_20</i>       | Unknown            | Hypothetical protein           | Unknown                           | -                                     | -                                         | 27.16                                 | 4.83                                  | 11.60                                 | 2.41                               | 1.68E-15                    | <b>7.91E-06</b>             | 0.0027707                     | 0.000877                      |
| SpM1_ChORF0622_s_at     | -            | <i>spy0622</i>                      | Unknown            | Hypothetical Cytosolic Protein | Unknown                           | -                                     | -                                         | 27.13                                 | -60.36                                | -54.24                                | 10.73                              | 1.07E-11                    | <b>7.91E-06</b>             | 0.2592664                     | 0.055659                      |
| SpM1_ChORF0921_s_at     | <i>miaA</i>  | <i>spy0921</i>                      | Protein synthesis  | tRNA synthetases               | tRNA synthetase                   | -                                     | -                                         | 27.00                                 | -30.72                                | 25.86                                 | 18.68                              | 0.0004102                   | <b>1.05E-05</b>             | 0.0410226                     | 0.010379                      |
| SpM1_ChORF1526_s_at     | -            | <i>spy1526</i>                      | Unknown            | Hypothetical protein           | Unknown                           | -                                     | -                                         | 26.58                                 | -46.52                                | -44.20                                | -114.82                            | 0.0028672                   | <b>3.84E-05</b>             | 3.89E-10                      | <b>0.000225</b>               |
| SpM1_ChORF1154_s_at     | <i>srtA</i>  | <i>spy1154</i>                      | Protein synthesis  | Protein translocation          | Protein secretion                 | -                                     | -                                         | 26.46                                 | -234.38                               | -254.60                               | -209.63                            | 9.10E-10                    | <b>7.91E-06</b>             | 3.57E-10                      | <b>0.000225</b>               |
| SpM1_ChORF1379_s_at     | -            | <i>spy1379</i>                      | Membrane transport | Membrane transport             | Membrane ion channel              | -                                     | -                                         | 25.98                                 | 94.73                                 | 117.43                                | -0.66                              | 8.31E-14                    | <b>7.91E-06</b>             | 0.8425171                     | 0.157736                      |
| SpM1_ChORF1637_s_at     | <i>atoB</i>  | <i>spy1637</i>                      | Cell envelope      | Membrane lipids                | Phospholipids biosynthesis        | -                                     | -                                         | 25.94                                 | -58.43                                | -102.61                               | -42.91                             | 2.57E-16                    | <b>7.91E-06</b>             | 1.03E-05                      | <b>0.000225</b>               |
| SpM1_ChORF1133_s_at     | <i>proV</i>  | <i>spy1133</i>                      | Membrane transport | Membrane transport             | Osmoprotectant membrane transport | -                                     | -                                         | 25.63                                 | -15.75                                | 21.78                                 | -44.39                             | 0.0440856                   | <b>0.000545</b>             | 0.0001037                     | <b>0.000227</b>               |
| M12_2021_x_at           | -            | <i>M12_2021</i>                     | Unknown            | Hypothetical protein           | Unknown                           | -                                     | -                                         | 25.47                                 | -27.48                                | -27.74                                | -17.96                             | 5.71E-07                    | <b>7.91E-06</b>             | 0.013056                      | 0.003662                      |
| SpM1_ChORF0421_s_at     | -            | <i>spy0421</i>                      | Unknown            | Hypothetical protein           | Unknown                           | -                                     | -                                         | 25.40                                 | -18.15                                | 43.82                                 | -75.47                             | 0.0008084                   | <b>1.40E-05</b>             | 3.92E-10                      | <b>0.000225</b>               |
| SpM1_ChORF1322_s_at     | -            | <i>spy1322</i>                      | Unknown            | Hypothetical Cytosolic Protein | Unknown                           | Essential                             | -                                         | 25.14                                 | 43.90                                 | 127.45                                | 2.95                               | 4.80E-13                    | <b>7.91E-06</b>             | 0.6885424                     | 0.133392                      |
| SpM1_ChORF1900_s_at     | <i>thiD</i>  | <i>spy1900</i>                      | Cofactors          |                                |                                   | -                                     | -                                         | 24.45                                 | -70.08                                | -150.12                               | 28.80                              | 5.79E-24                    | <b>7.91E-06</b>             | 0.0067438                     | 0.001995                      |
| SpM5_ChORF169a-188_s_at | -            | <i>SpyoM5_Chr ORF_169a5.p1t_188</i> | Unknown            | Hypothetical protein           | Unknown                           | -                                     | -                                         | 24.43                                 | -2.35                                 | -21.94                                | -59.32                             | 0.0001665                   | <b>8.65E-06</b>             | 1.18E-11                      | <b>0.000225</b>               |
| SpM1_ChORF1280_s_at     | <i>glmS</i>  | <i>spy1280</i>                      | Cell envelope      | Cell wall                      | Aminosugar metabolism             | Essential                             | Essential                                 | 24.12                                 | 228.92                                | 560.98                                | 95.11                              | 8.26E-14                    | <b>7.91E-06</b>             | 0.0027181                     | 0.000863                      |
| SpM3_ChORF1124_s_at     | -            | <i>SpyM3_1124</i>                   | Unknown            | Hypothetical protein           | Unknown                           | -                                     | -                                         | 24.05                                 | -46.74                                | -49.21                                | -36.91                             | 5.64E-17                    | <b>7.91E-06</b>             | 3.40E-10                      | <b>0.000225</b>               |



| Probe Set Name*        | Gene Name     | Synonym                       | Category                | Subcategory                    | Function                             | <i>Bacillus subtilis</i> † | <i>Staphylococcus aureus</i> † | Difference Time (30 - 0)‡ | Difference Time (60 - 0)‡ | Difference Time (90 - 0)‡ | Difference (Mut - WT)‡ | P-value (Time)§ | Q-value (Time)§ | P-value (Strain)§ | Q-value (Strain)§ |
|------------------------|---------------|-------------------------------|-------------------------|--------------------------------|--------------------------------------|----------------------------|--------------------------------|---------------------------|---------------------------|---------------------------|------------------------|-----------------|-----------------|-------------------|-------------------|
| SpM1_ChORF1638_s_at    | <i>atoD.1</i> | <i>spy1638</i>                | Cell envelope           | Membrane lipids                | Phospholipids biosynthesis           | -                          | -                              | 23.99                     | -56.46                    | -80.49                    | -36.56                 | 2.92E-19        | <b>7.91E-06</b> | 1.76E-06          | <b>0.000225</b>   |
| SpM1_ChORF1640_s_at    | -             | <i>spy1640</i>                | Unknown                 | Hypothetical protein           | Unknown                              | -                          | -                              | 23.96                     | -15.33                    | -61.96                    | -58.37                 | 7.93E-10        | <b>7.91E-06</b> | 1.42E-08          | <b>0.000225</b>   |
| SpM1_ChORF0883_s_at    | <i>dyr</i>    | <i>spy0883</i>                | Cofactors               | Folate                         | Folate biosynthesis                  | -                          | -                              | 23.60                     | -180.90                   | -242.06                   | -30.26                 | 3.60E-21        | <b>7.91E-06</b> | 0.0714026         | 0.017222          |
| SpM12_ChORF299-51_s_at | -             | <i>SpyoM12_Chr ORF_299_51</i> | Unknown                 | Hypothetical protein           | Unknown                              | -                          | Essential                      | 23.53                     | 1.61                      | 17.38                     | 3.65                   | 1.15E-11        | <b>7.91E-06</b> | 2.94E-13          | <b>0.000225</b>   |
| SpM1_ChORF0572_s_at    | -             | <i>spy0572</i>                | Membrane transport      | Membrane transport             | Carbohydrate membrane transport      | -                          | -                              | 23.49                     | 143.22                    | 144.90                    | -7.85                  | 0.0011447       | <b>1.74E-05</b> | 0.5208345         | 0.105072          |
| SpM1_ChORF0536_s_at    | -             | <i>spy0536</i>                | Unknown                 | Hypothetical Cytosolic Protein | Unknown                              | -                          | -                              | 23.48                     | 2.73                      | 1.12                      | -12.35                 | 1.20E-10        | <b>7.91E-06</b> | 1.76E-12          | <b>0.000225</b>   |
| SpM1_ChORF1323_s_at    | -             | <i>spy1323</i>                | Membrane transport      | Membrane transport             | Carbohydrate membrane transport      | -                          | -                              | 23.43                     | 36.37                     | 104.82                    | 7.75                   | 8.33E-11        | <b>7.91E-06</b> | 0.3625464         | 0.075794          |
| SpM3_ChORF1017_s_at    | -             | <i>SpyM3_1017</i>             | Unknown                 | Hypothetical protein           | Unknown                              | -                          | -                              | 23.43                     | 5.93                      | -9.22                     | -22.93                 | 0.0099679       | <b>0.000128</b> | 0.0006431         | <b>0.000316</b>   |
| SpM1_ChORF1492_s_at    | -             | <i>spy1492</i>                | Unknown                 | Hypothetical protein           | Unknown                              | -                          | -                              | 23.13                     | 5.27                      | -98.51                    | -195.14                | 0.000257        | <b>9.25E-06</b> | 1.18E-12          | <b>0.000225</b>   |
| SpM1_ChORF1288_s_at    | -             | <i>spy1288</i>                | Membrane transport      | Membrane transport             | Unknown substrate membrane transport | -                          | -                              | 23.08                     | -41.17                    | -76.03                    | -25.72                 | 8.84E-13        | <b>7.91E-06</b> | 0.000734          | <b>0.000336</b>   |
| SpM12_ChORF217-7_s_at  | -             | <i>SpyoM12_Chr ORF_217_7</i>  | Unknown                 | Hypothetical protein           | Unknown                              | -                          | -                              | 23.01                     | 0.44                      | 5.41                      | -1.13                  | 6.54E-06        | <b>7.91E-06</b> | 0.3688221         | 0.076877          |
| SpM1_ChORF1270_s_at    | -             | <i>spy1270</i>                | Membrane transport      | Membrane transport             | Amino acid membrane transport        | -                          | -                              | 22.90                     | -12.51                    | 17.52                     | 39.46                  | 0.0700118       | 0.000851        | 0.0017782         | 0.0006            |
| SpM1_ChORF1138_s_at    | -             | <i>spy1138</i>                | Cofactors               |                                |                                      | -                          | -                              | 22.89                     | -60.10                    | -84.51                    | -60.96                 | 6.62E-13        | <b>7.91E-06</b> | 7.23E-10          | <b>0.000225</b>   |
| SpM1_ChORF1793_s_at    | -             | <i>spy1793</i>                | Membrane transport      | Membrane transport             | Metal ion membrane transport         | -                          | -                              | 22.85                     | -28.13                    | -78.19                    | -73.00                 | 4.47E-14        | <b>7.91E-06</b> | 1.01E-13          | <b>0.000225</b>   |
| SpM18_ChORF2167_x_at   | -             | <i>spyM18_2167</i>            | Unknown                 | Hypothetical protein           | Unknown                              | Essential                  | Essential                      | 22.36                     | 72.07                     | 205.50                    | -598.78                | 0.0073429       | <b>9.54E-05</b> | 5.28E-22          | <b>0.000225</b>   |
| SpM1_ChORF0518_s_at    | -             | <i>spy0518</i>                | Membrane transport      | Membrane transport             | Unknown substrate membrane transport | -                          | -                              | 22.05                     | 35.98                     | 24.01                     | -12.54                 | 0.0493006       | 0.000608        | 0.1308574         | 0.029784          |
| SpM1_ChORF0370_s_at    | -             | <i>spy0370</i>                | Unknown                 | Hypothetical protein           | Unknown                              | -                          | -                              | 21.72                     | -25.02                    | -128.79                   | 31.21                  | 6.78E-19        | <b>7.91E-06</b> | 0.0052034         | 0.001566          |
| SpM18_ChORF0701_s_at   | -             | <i>spy0638</i>                | Carbohydrate metabolism | Carbohydrate assimilation      | Carbohydrate assimilation            | -                          | -                              | 21.53                     | 34.37                     | 51.95                     | -0.41                  | 3.35E-10        | <b>7.91E-06</b> | 0.6078243         | 0.119869          |
| SpM1_ChORF1639_s_at    | <i>atoA</i>   | <i>spy1639</i>                | Cell envelope           | Membrane lipids                | Phospholipids biosynthesis           | -                          | -                              | 21.44                     | -26.84                    | -26.79                    | -23.57                 | 3.31E-14        | <b>7.91E-06</b> | 1.20E-06          | <b>0.000225</b>   |
| SpM1_ChORF1083_at      | <i>srtA</i>   | <i>spy1083</i>                | Virulence               | Virulence interacting proteins | Lantibiotic, Quorum sensing          | -                          | -                              | 21.24                     | 2.24                      | 13.45                     | 1.55                   | 1.22E-10        | <b>7.91E-06</b> | 0.0007246         | <b>0.000334</b>   |
| SpM12_ChORF218-1_s_at  | -             | <i>SpyoM12_Chr ORF_218_1</i>  | Unknown                 | Hypothetical protein           | Unknown                              | -                          | -                              | 20.96                     | 0.52                      | 4.72                      | -2.71                  | 2.26E-07        | <b>7.91E-06</b> | 6.00E-06          | <b>0.000225</b>   |
| SpM1_ChORF2007_s_at    | <i>lmb</i>    | <i>spy2007</i>                | Virulence               | Virulence interacting proteins | Cell surface protein                 | -                          | -                              | 20.71                     | -36.97                    | 8.81                      | -40.54                 | 7.12E-06        | <b>7.91E-06</b> | 2.77E-07          | <b>0.000225</b>   |

| Probe Set Name*         | Gene Name    | Synonym                             | Category                | Subcategory                     | Function                          | <i>Bacillus subtilis</i> <sup>†</sup> | <i>Staphylococcus aureus</i> <sup>†</sup> | Difference Time (30 - 0) <sup>‡</sup> | Difference Time (60 - 0) <sup>‡</sup> | Difference Time (90 - 0) <sup>‡</sup> | Difference (Mut - WT) <sup>‡</sup> | P-value (Time) <sup>§</sup> | Q-value (Time) <sup>§</sup> | P-value (Strain) <sup>§</sup> | Q-value (Strain) <sup>§</sup> |
|-------------------------|--------------|-------------------------------------|-------------------------|---------------------------------|-----------------------------------|---------------------------------------|-------------------------------------------|---------------------------------------|---------------------------------------|---------------------------------------|------------------------------------|-----------------------------|-----------------------------|-------------------------------|-------------------------------|
| SpM1_ChORF0346_s_at     | -            | <i>spy0346</i>                      | Unknown                 | Hypothetical protein            | Unknown                           | -                                     | -                                         | 20.70                                 | 104.36                                | 182.59                                | -123.86                            | 9.52E-11                    | <b>7.91E-06</b>             | 4.98E-11                      | <b>0.000225</b>               |
| SpM1_ChORF1409_s_at     | <i>comEA</i> | <i>spy1409</i>                      | Membrane transport      | Membrane transport              | Quorum sensing membrane transport | -                                     | -                                         | 20.66                                 | -12.53                                | -18.47                                | 12.18                              | 1.01E-06                    | <b>7.91E-06</b>             | 0.031344                      | 0.008184                      |
| SpM1_ChORF1384_s_at     | -            | <i>spy1384</i>                      | Unknown                 | Hypothetical protein            | Unknown                           | -                                     | -                                         | 20.42                                 | 34.65                                 | 45.10                                 | 26.78                              | 0.0738794                   | 0.000895                    | 0.0176009                     | 0.004855                      |
| SpM1_ChORF0147_s_at     | -            | <i>spy0147</i>                      | Unknown                 | Hypothetical cytosolic protein  | Unknown                           | -                                     | -                                         | 20.26                                 | -4.39                                 | -1.91                                 | -3.71                              | 0.0008025                   | <b>1.39E-05</b>             | 0.4002282                     | 0.082688                      |
| SpM1_ChORF1218_s_at     | -            | <i>spy1218</i>                      | Unknown                 | Hypothetical protein            | Unknown                           | -                                     | -                                         | 19.76                                 | 318.40                                | 182.91                                | 40.01                              | 4.10E-08                    | <b>7.91E-06</b>             | 0.2267341                     | 0.049307                      |
| SpM5_ChORF270b-333_s_at | -            | <i>SpyoM5_ChORF_270b10.p1t_333</i>  | Unknown                 | Hypothetical protein            | Unknown                           | -                                     | -                                         | 19.66                                 | -2.84                                 | 21.15                                 | -14.19                             | 5.08E-05                    | <b>7.98E-06</b>             | 0.0055046                     | 0.001646                      |
| SpM1_ChORF0399_s_at     | <i>tmk</i>   | <i>spy0399</i>                      | Nucleotides             | Nucleotides biosynthesis        | Pyrimidine biosynthesis           | -                                     | -                                         | 19.54                                 | 122.51                                | 148.76                                | 5.25                               | 1.13E-07                    | <b>7.91E-06</b>             | 0.8771403                     | 0.163096                      |
| SpM12_ChORF299-7_at     | -            | <i>SpyoM12_ChORF_299_7</i>          | Unknown                 | Hypothetical protein            | Unknown                           | -                                     | -                                         | 19.48                                 | -8.72                                 | 0.07                                  | 4.85                               | 0.0045003                   | <b>5.93E-05</b>             | 0.3939364                     | 0.081724                      |
| SpM1_ChORF1408_s_at     | <i>comEC</i> | <i>spy1408</i>                      | Membrane transport      | Membrane transport              | Quorum sensing membrane transport | -                                     | -                                         | 19.43                                 | -3.12                                 | -9.91                                 | 15.90                              | 0.0002396                   | <b>9.13E-06</b>             | 0.0038131                     | 0.001172                      |
| SpM1_ChORF1180_s_at     | -            | <i>spy1180</i>                      | Membrane transport      | Membrane transport              | Carbohydrate membrane transport   | -                                     | -                                         | 19.35                                 | -24.93                                | -28.77                                | 16.83                              | 1.94E-05                    | <b>7.91E-06</b>             | 0.0395941                     | 0.010061                      |
| SpM1_ChORF0110_s_at     | -            | <i>spy0110</i>                      | Unknown                 | Hypothetical protein            | Unknown                           | -                                     | -                                         | 19.19                                 | 0.22                                  | 3.76                                  | -2.42                              | 6.48E-07                    | <b>7.91E-06</b>             | 0.1275228                     | 0.029177                      |
| SpM1_ChORF1113_s_at     | -            | <i>spy1113</i>                      | Unknown                 | Hypothetical protein            | Unknown                           | -                                     | -                                         | 19.04                                 | 846.52                                | 806.17                                | 289.22                             | 6.75E-29                    | <b>7.91E-06</b>             | 2.71E-11                      | <b>0.000225</b>               |
| SpM49_ChORF7585-5_at    | -            | <i>SpyoM49_ChORF_sp001_0_7585_5</i> | Unknown                 | Hypothetical protein            | Unknown                           | -                                     | -                                         | 19.02                                 | -23.79                                | -22.55                                | 33.09                              | 0.0001184                   | <b>8.35E-06</b>             | 3.75E-05                      | <b>0.000225</b>               |
| SpM1_ChORF2183_s_at     | <i>rplI</i>  | <i>spy2183</i>                      | Protein synthesis       | Ribosomal proteins              | Ribosomal protein                 | -                                     | -                                         | 18.95                                 | -502.61                               | -898.58                               | -221.35                            | 1.03E-25                    | <b>7.91E-06</b>             | 2.55E-07                      | <b>0.000225</b>               |
| SpM1_ChORF1109_s_at     | <i>malP</i>  | <i>spy1109</i>                      | Membrane transport      | Membrane transport              | Carbohydrate membrane transport   | Essential                             | -                                         | 18.77                                 | -14.48                                | -14.91                                | 4.29                               | 3.23E-08                    | <b>7.91E-06</b>             | 0.3452424                     | 0.072521                      |
| SpM3_ChORF1054_s_at     | -            | <i>SpyM3_1054</i>                   | Unknown                 | Hypothetical protein            | Unknown                           | -                                     | -                                         | 18.66                                 | 1.79                                  | -1.84                                 | -18.06                             | 0.0563785                   | 0.000693                    | 0.0012411                     | <b>0.000457</b>               |
| SpM12_ChORF299-5_s_at   | -            | <i>SpyoM12_ChORF_299_5</i>          | Unknown                 | Hypothetical protein            | Unknown                           | Essential                             | -                                         | 18.64                                 | -8.35                                 | -1.82                                 | 6.67                               | 0.0100096                   | <b>0.000129</b>             | 0.3121935                     | 0.065973                      |
| SpM5_ChORF270b-559_at   | -            | <i>SpyoM5_ChORF_270b10.p1t_559</i>  | Unknown                 | Hypothetical protein            | Unknown                           | -                                     | -                                         | 18.52                                 | -6.93                                 | -8.88                                 | 27.21                              | 0.0002635                   | <b>9.30E-06</b>             | 9.19E-08                      | <b>0.000225</b>               |
| SpM1_ChORF1682_s_at     | <i>glpF</i>  | <i>spy1682</i>                      | Carbohydrate metabolism | Carbohydrate central metabolism | Carbohydrate central metabolism   | -                                     | -                                         | 18.36                                 | 46.04                                 | 254.24                                | 81.12                              | 4.84E-19                    | <b>7.91E-06</b>             | 8.14E-09                      | <b>0.000225</b>               |
| SpM1_ChORF1717_at       | <i>copY</i>  | <i>spy1717</i>                      | RNA metabolism          | Transcription r                 | regulation                        | -                                     | -                                         | 18.01                                 | 19.68                                 | 26.47                                 | -0.23                              | 0.2400448                   | 0.002807                    | 0.5376427                     | 0.107783                      |
| SpM3_ChORF1004_s_at     | -            | <i>SpyM3_1004</i>                   | Unknown                 | Hypothetical protein            | Unknown                           | -                                     | -                                         | 17.71                                 | 41.20                                 | 93.42                                 | 15.41                              | 2.44E-09                    | <b>7.91E-06</b>             | 0.0878733                     | 0.020809                      |
| SpM1_ChORF0824_s_at     | -            | <i>spy0824</i>                      | RNA metabolism          | Transcription r                 | regulation                        | -                                     | -                                         | 17.69                                 | -85.26                                | -122.42                               | -28.70                             | 1.71E-15                    | <b>7.91E-06</b>             | 0.0013166                     | <b>0.000477</b>               |

| Probe Set Name*        | Gene Name     | Synonym                            | Category                | Subcategory                    | Function                          | <i>Bacillus subtilis</i> <sup>†</sup> | <i>Staphylococcus aureus</i> <sup>†</sup> | Difference Time (30 - 0) <sup>‡</sup> | Difference Time (60 - 0) <sup>‡</sup> | Difference Time (90 - 0) <sup>‡</sup> | Difference (Mut - WT) <sup>‡</sup> | P-value (Time) <sup>§</sup> | Q-value (Time) <sup>§</sup> | P-value (Strain) <sup>§</sup> | Q-value (Strain) <sup>§</sup> |
|------------------------|---------------|------------------------------------|-------------------------|--------------------------------|-----------------------------------|---------------------------------------|-------------------------------------------|---------------------------------------|---------------------------------------|---------------------------------------|------------------------------------|-----------------------------|-----------------------------|-------------------------------|-------------------------------|
| SpM1_ChORF1048_s_at    | -             | <i>spy1048</i>                     | Unknown                 | Hypothetical protein           | Unknown                           | -                                     | -                                         | 17.61                                 | 0.58                                  | 18.06                                 | -20.13                             | 0.0034025                   | <b>4.52E-05</b>             | 2.94E-06                      | <b>0.000225</b>               |
| SpM12_ChORF281-7_s_at  | -             | <i>SpyoM12_ChORF_281_7</i>         | Unknown                 | Hypothetical protein           | Unknown                           | -                                     | -                                         | 17.43                                 | -2.76                                 | 20.69                                 | -10.27                             | 0.0004976                   | <b>1.12E-05</b>             | 0.0389845                     | 0.009935                      |
| SpM1_ChORF0796_s_at    | -             | <i>spy0796</i>                     | Unknown                 | Hypothetical protein           | Unknown                           | -                                     | -                                         | 16.98                                 | -10.69                                | -88.90                                | -25.98                             | 1.27E-10                    | <b>7.91E-06</b>             | 0.0105194                     | 0.002998                      |
| SpM1_ChORF1285_s_at    | -             | <i>spy1285</i>                     | RNA metabolism          | Transcription regulation       |                                   | -                                     | -                                         | 16.26                                 | 174.69                                | 225.00                                | 176.08                             | 3.00E-15                    | <b>7.91E-06</b>             | 2.45E-15                      | <b>0.000225</b>               |
| SpM1_ChORF0315_s_at    | -             | <i>spy0315</i>                     | Unknown                 | Hypothetical protein           | Unknown                           | -                                     | -                                         | 16.19                                 | -2.07                                 | -3.04                                 | -11.73                             | 6.87E-08                    | <b>7.91E-06</b>             | 1.31E-09                      | <b>0.000225</b>               |
| SpM1_ChORF0141_s_at    | <i>atoD.2</i> | <i>spy0141</i>                     | Carbohydrate metabolism | Carbohydrate assimilation      | Carbohydrate assimilation         | -                                     | -                                         | 15.81                                 | 37.10                                 | 40.06                                 | 5.27                               | 3.40E-08                    | <b>7.91E-06</b>             | 0.5366058                     | 0.107636                      |
| SpM1_ChORF0519_s_at    | -             | <i>spy0519</i>                     | Unknown                 | Hypothetical membrane protein  | Unknown                           | -                                     | -                                         | 15.63                                 | 26.64                                 | 18.28                                 | -10.25                             | 0.0180649                   | <b>0.000229</b>             | 0.0939194                     | 0.022137                      |
| M12_1770_at            | -             | <i>M12_1770</i>                    | Phage                   | Phage proteins                 |                                   | -                                     | -                                         | 15.58                                 | -6.93                                 | 25.13                                 | -22.50                             | 0.0245989                   | <b>0.00031</b>              | 0.0037939                     | 0.001167                      |
| SpM1_ChORF1034_s_at    | <i>cobQ</i>   | <i>spy1034</i>                     | Cofactors               |                                |                                   | -                                     | -                                         | 15.50                                 | -67.22                                | -85.41                                | -47.78                             | 5.84E-18                    | <b>7.91E-06</b>             | 4.05E-10                      | <b>0.000225</b>               |
| SpM12_ChORF299-39_s_at | -             | <i>SpyoM12_ChORF_299_39</i>        | Unknown                 | Hypothetical protein           | Unknown                           | -                                     | -                                         | 15.26                                 | -41.19                                | -16.24                                | -30.64                             | 1.19E-05                    | <b>7.91E-06</b>             | 7.38E-05                      | <b>0.000225</b>               |
| SpM12_ChORF299-6_s_at  | -             | <i>SpyoM12_ChORF_299_6</i>         | Unknown                 | Hypothetical protein           | Unknown                           | -                                     | -                                         | 15.14                                 | -17.63                                | 5.42                                  | 8.05                               | 0.0009721                   | <b>1.56E-05</b>             | 0.2056543                     | 0.045227                      |
| SpM1_ChORF1658_s_at    | -             | <i>spy1657</i>                     | Membrane transport      | Membrane transport             | Amino acid membrane transport     | -                                     | -                                         | 14.89                                 | -113.24                               | -116.28                               | 116.00                             | 4.04E-05                    | <b>7.95E-06</b>             | 5.60E-06                      | <b>0.000225</b>               |
| SpM1_ChORF1326_s_at    | -             | <i>spy1326</i>                     | Unknown                 | Hypothetical membrane protein  | Unknown                           | -                                     | -                                         | 14.87                                 | 33.75                                 | 56.61                                 | 25.20                              | 0.0003096                   | <b>9.63E-06</b>             | 0.0054682                     | 0.001637                      |
| SpM12_ChORF218-7_s_at  | -             | <i>SpyoM12_ChORF_218_7</i>         | Unknown                 | Hypothetical protein           | Unknown                           | -                                     | -                                         | 14.85                                 | 1.50                                  | -2.42                                 | -17.12                             | 0.0651706                   | 0.000795                    | 0.00088                       | <b>0.000367</b>               |
| SpM1_ChORF1123_s_at    | <i>prs</i>    | <i>spy1123</i>                     | Carbohydrate metabolism | Bioenergetics                  | Glycolysis                        | -                                     | -                                         | 14.67                                 | -159.86                               | -300.34                               | 22.73                              | 2.51E-10                    | <b>7.91E-06</b>             | 0.974649                      | 0.17828                       |
| SpM1_ChORF1994_s_at    | -             | <i>spy1994</i>                     | RNA metabolism          | Transcription regulation       |                                   | -                                     | -                                         | 14.21                                 | -11.88                                | 40.65                                 | -42.18                             | 0.0003496                   | <b>9.95E-06</b>             | 2.14E-06                      | <b>0.000225</b>               |
| SpM18_ChORF0202_s_at   | -             | <i>spyM18_0202</i>                 | Unknown                 | Hypothetical protein           | Unknown                           | Essential                             | -                                         | 14.20                                 | 2.97                                  | -0.96                                 | -1.70                              | 1.09E-06                    | <b>7.91E-06</b>             | 0.001321                      | <b>0.000478</b>               |
| SpM1_ChORF1087_s_at    | <i>srtG</i>   | <i>spy1087</i>                     | Virulence               | Virulence interacting proteins | Lantibiotic, Quorum sensing       | Essential                             | Essential                                 | 14.16                                 | -6.66                                 | -55.61                                | -13.73                             | 5.59E-08                    | <b>7.91E-06</b>             | 0.0538101                     | 0.013336                      |
| SpM18_ChORF0148_s_at   | <i>msmRL</i>  | <i>spyM18_0148</i>                 | Carbohydrate metabolism | Bioenergetics                  | Unknown                           | -                                     | -                                         | 14.01                                 | 23.59                                 | 65.58                                 | 5.55                               | 2.22E-07                    | <b>7.91E-06</b>             | 0.5226277                     | 0.105253                      |
| SpM18_ChORF1800_at     | -             | <i>spyM18_1800</i>                 | Phage                   | Phage proteins                 |                                   | -                                     | -                                         | 13.90                                 | -4.52                                 | 18.11                                 | -88.85                             | 0.4708725                   | 0.005412                    | 1.40E-14                      | <b>0.000225</b>               |
| SpM1_ChORF0104_s_at    | -             | <i>spy0104</i>                     | Membrane transport      | Membrane transport             | Quorum sensing membrane transport | -                                     | -                                         | 13.67                                 | -18.16                                | 1.57                                  | 1.08                               | 1.57E-14                    | <b>7.91E-06</b>             | 0.1079974                     | 0.025052                      |
| SpM12_ChORF299-40_at   | -             | <i>SpyoM12_ChORF_299_40</i>        | Unknown                 | Hypothetical protein           | Unknown                           | -                                     | -                                         | 13.64                                 | -24.41                                | -6.71                                 | -24.61                             | 0.0007805                   | <b>1.37E-05</b>             | 0.0001905                     | <b>0.000236</b>               |
| SpM5_ChORF270b-557_at  | -             | <i>SpyoM5_ChORF_270b10.p1t_557</i> | Unknown                 | Hypothetical protein           | Unknown                           | -                                     | -                                         | 13.57                                 | -7.74                                 | -11.47                                | 28.31                              | 0.0084945                   | <b>0.00011</b>              | 1.87E-06                      | <b>0.000225</b>               |
| SpM1_ChORF0112_s_at    | <i>proC</i>   | <i>spy0112</i>                     | Amino acid metabolism   | Amino acid catabolism          | Amino acid catabolism             | Essential                             | -                                         | 13.36                                 | -16.20                                | -2.60                                 | -259.81                            | 0.7930751                   | 0.009072                    | 5.57E-21                      | <b>0.000225</b>               |

| Probe Set Name*        | Gene Name   | Synonym                                | Category              | Subcategory                            | Function                               | <i>Bacillus subtilis</i> <sup>†</sup> | <i>Staphylococcus aureus</i> <sup>†</sup> | Difference Time (30 - 0) <sup>‡</sup> | Difference Time (60 - 0) <sup>‡</sup> | Difference Time (90 - 0) <sup>‡</sup> | Difference (Mut - WT) <sup>‡</sup> | P-value (Time) <sup>§</sup> | Q-value (Time) <sup>§</sup> | P-value (Strain) <sup>§</sup> | Q-value (Strain) <sup>§</sup> |
|------------------------|-------------|----------------------------------------|-----------------------|----------------------------------------|----------------------------------------|---------------------------------------|-------------------------------------------|---------------------------------------|---------------------------------------|---------------------------------------|------------------------------------|-----------------------------|-----------------------------|-------------------------------|-------------------------------|
| SpM12_ChORF236-4_s_at  | -           | <i>SpyoM12_ChORF_236_4</i>             | Unknown               | Hypothetical protein                   | Unknown                                | -                                     | -                                         | 13.32                                 | -5.44                                 | -4.70                                 | -16.15                             | 7.00E-06                    | <b>7.91E-06</b>             | 2.29E-09                      | <b>0.000225</b>               |
| SpM1_ChORF2089_s_at    | <i>hutH</i> | <i>spy2089</i>                         | Amino acid metabolism | Amino acid catabolism                  | Amino acid catabolism                  | -                                     | -                                         | 13.28                                 | 21.29                                 | 204.12                                | 20.41                              | 1.49E-13                    | <b>7.91E-06</b>             | 0.1049832                     | 0.024449                      |
| SpM12_ChORF289-13_s_at | -           | <i>SpyoM12_ChORF_289_13</i>            | Unknown               | Hypothetical protein                   | Unknown                                | -                                     | -                                         | 13.13                                 | -32.07                                | -11.09                                | 3.61                               | 0.0026996                   | <b>3.62E-05</b>             | 0.5234354                     | 0.105295                      |
| SpM1_ChORF1593_s_at    | -           | <i>spy1593</i>                         | Membrane transport    | Membrane transport                     | Carbohydrate membrane transport        | -                                     | -                                         | 13.03                                 | 56.00                                 | 205.41                                | 108.63                             | 3.58E-11                    | <b>7.91E-06</b>             | 7.90E-09                      | <b>0.000225</b>               |
| SpM1_ChORF2121_s_at    | <i>mutL</i> | <i>spy2121</i>                         | DNA metabolism        | DNA replication, modification & repair | DNA replication, modification & repair | -                                     | -                                         | 12.87                                 | 5.13                                  | -71.95                                | -89.39                             | 1.81E-07                    | <b>7.91E-06</b>             | 1.30E-11                      | <b>0.000225</b>               |
| SpM1_ChORF1591_s_at    | -           | <i>spy1591</i>                         | Unknown               | Hypothetical protein                   | Unknown                                | -                                     | -                                         | 12.67                                 | 60.18                                 | 330.31                                | 140.96                             | 7.63E-17                    | <b>7.91E-06</b>             | 3.95E-11                      | <b>0.000225</b>               |
| SpM5_ChORF270b-141_at  | -           | <i>SpyoM5_ChORF_270b10.p1t_141</i>     | Unknown               | Hypothetical protein                   | Unknown                                | -                                     | -                                         | 12.29                                 | 15.27                                 | -4.62                                 | 7.19                               | 0.021866                    | <b>0.000276</b>             | 0.2204842                     | 0.048067                      |
| SpM1_ChORF1796_s_at    | <i>shp</i>  | <i>spy1796</i>                         | Membrane transport    | Membrane transport                     | Metal ion membrane transport           | -                                     | -                                         | 12.24                                 | -54.49                                | -95.10                                | -80.28                             | 2.60E-16                    | <b>7.91E-06</b>             | 2.72E-15                      | <b>0.000225</b>               |
| SpM49_ChORF7585-30_at  | -           | <i>SpyoM49_ChORF_sp001_0_7585_30</i>   | Unknown               | Hypothetical protein                   | Unknown                                | -                                     | -                                         | 11.98                                 | -2.05                                 | 13.40                                 | -18.11                             | 0.0215018                   | <b>0.000272</b>             | 1.13E-05                      | <b>0.000225</b>               |
| SpM1_ChORF2084_s_at    | -           | <i>spy2084</i>                         | Nucleotides           | Nucleotides metabolism                 | Purine salvage                         | -                                     | -                                         | 11.97                                 | 21.95                                 | 184.14                                | 22.98                              | 1.06E-17                    | <b>7.91E-06</b>             | 0.0033205                     | 0.001035                      |
| SpM1_ChORF1144_s_at    | -           | <i>spy1144</i>                         | Unknown               | Hypothetical Cytosolic Protein         | Unknown                                | -                                     | -                                         | 11.78                                 | -32.00                                | -110.05                               | -10.44                             | 1.14E-15                    | <b>7.91E-06</b>             | 0.5773794                     | 0.114572                      |
| SpM1_ChORF1086_s_at    | <i>srtE</i> | <i>spy1086</i>                         | Virulence             | Virulence interacting proteins         | Lantibiotic, Quorum sensing            | Essential                             | -                                         | 11.78                                 | -11.41                                | -13.92                                | -15.79                             | 1.92E-06                    | <b>7.91E-06</b>             | 0.000139                      | <b>0.00023</b>                |
| SpM1_ChORF1437_s_at    | -           | <i>spy1437</i>                         | Phage                 | Phage proteins                         |                                        | -                                     | -                                         | 11.69                                 | 38.78                                 | 33.29                                 | 128.18                             | 0.0156692                   | <b>0.0002</b>               | 3.10E-18                      | <b>0.000225</b>               |
| SpM1_ChORF1700_s_at    | -           | <i>spy1700</i>                         | Unknown               | Hypothetical cytosolic Protein         | Unknown                                | -                                     | -                                         | 11.66                                 | -27.00                                | -47.61                                | -37.25                             | 1.42E-05                    | <b>7.91E-06</b>             | 2.98E-06                      | <b>0.000225</b>               |
| SpM12_ChORF299-43_at   | -           | <i>SpyoM12_ChORF_299_43</i>            | Unknown               | Hypothetical protein                   | Unknown                                | Essential                             | -                                         | 11.49                                 | -28.71                                | -2.21                                 | -15.62                             | 1.52E-06                    | <b>7.91E-06</b>             | 0.0005746                     | <b>0.000303</b>               |
| SpM1_ChORF0549_s_at    | -           | <i>spy0549</i>                         | Unknown               | Hypothetical Cytosolic Protein         | Unknown                                | -                                     | -                                         | 11.45                                 | -16.54                                | -16.48                                | -3.56                              | 6.10E-14                    | <b>7.91E-06</b>             | 1.50E-14                      | <b>0.000225</b>               |
| SpM5_ChORFJ7578C-203_  | -           | <i>SpyoM5_ChORF_J7578C.e05.s1c_203</i> | Unknown               | Hypothetical protein                   | Unknown                                | -                                     | -                                         | 11.39                                 | 25.82                                 | 12.38                                 | 23.04                              | 0.0430128                   | <b>0.000533</b>             | 0.0004052                     | <b>0.000271</b>               |
| SpM1_ChORF1181_s_at    | -           | <i>spy1181</i>                         | Unknown               | Hypothetical protein                   | Unknown                                | -                                     | -                                         | 11.35                                 | 0.02                                  | 10.99                                 | -5.85                              | 1.37E-05                    | <b>7.91E-06</b>             | 0.0022962                     | 0.000747                      |
| SpM18_ChORF1359_at     | -           | <i>spyM18_1359</i>                     | Unknown               | Hypothetical protein                   | Unknown                                | -                                     | -                                         | 11.33                                 | 2.33                                  | 29.46                                 | 23.24                              | 0.1392763                   | 0.001656                    | 0.0209296                     | 0.005689                      |
| SpM1_ChORF0952_at      | -           | <i>spy0952</i>                         | Phage                 | Phage proteins                         | Hypothetical cytosolic protein         | -                                     | -                                         | 11.31                                 | 30.12                                 | 15.80                                 | 25.09                              | 0.0024489                   | <b>3.30E-05</b>             | 2.51E-05                      | <b>0.000225</b>               |

| Probe Set Name*       | Gene Name   | Synonym                                | Category                | Subcategory                            | Function                               | <i>Bacillus subtilis</i> <sup>†</sup> | <i>Staphylococcus aureus</i> <sup>†</sup> | Difference Time (30 - 0) <sup>‡</sup> | Difference Time (60 - 0) <sup>‡</sup> | Difference Time (90 - 0) <sup>‡</sup> | Difference (Mut - WT) <sup>‡</sup> | P-value (Time) <sup>§</sup> | Q-value (Time) <sup>§</sup> | P-value (Strain) <sup>§</sup> | Q-value (Strain) <sup>§</sup> |
|-----------------------|-------------|----------------------------------------|-------------------------|----------------------------------------|----------------------------------------|---------------------------------------|-------------------------------------------|---------------------------------------|---------------------------------------|---------------------------------------|------------------------------------|-----------------------------|-----------------------------|-------------------------------|-------------------------------|
| SpM1_ChORF1714_s_at   | <i>copZ</i> | <i>spy1714</i>                         | Membrane transport      | Membrane transport                     | Metal ion membrane transport           | -                                     | -                                         | 11.29                                 | 330.62                                | 680.48                                | 288.71                             | 1.93E-23                    | <b>7.91E-06</b>             | 4.01E-14                      | <b>0.000225</b>               |
| SpM1_ChORF1683_s_at   | <i>glpO</i> | <i>spy1683</i>                         | Carbohydrate metabolism | Carbohydrate central metabolism        | Carbohydrate central metabolism        | -                                     | -                                         | 11.18                                 | 108.10                                | 443.57                                | 171.56                             | 3.33E-23                    | <b>7.91E-06</b>             | 3.49E-13                      | <b>0.000225</b>               |
| SpM1_ChORF1478_s_at   | -           | <i>spy1478</i>                         | Phage                   | Phage proteins                         |                                        | -                                     | -                                         | 11.03                                 | 26.36                                 | 10.32                                 | 20.37                              | 0.0421655                   | <b>0.000523</b>             | 0.0014746                     | <b>0.000517</b>               |
| SpM3_ChORF1136_s_at   | -           | <i>SpyM3_1136</i>                      | Unknown                 | Hypothetical protein                   | Unknown                                | -                                     | -                                         | 10.76                                 | 19.62                                 | 7.21                                  | 22.11                              | 0.2041103                   | 0.002399                    | 0.0007895                     | <b>0.000347</b>               |
| SpM1_ChORF0957_s_at   | -           | <i>spy0957</i>                         | Phage                   | Phage proteins                         | Hypothetical cytosolic protein         | -                                     | -                                         | 10.74                                 | 27.54                                 | 13.92                                 | 21.16                              | 0.0323516                   | <b>0.000404</b>             | 0.0010043                     | <b>0.000396</b>               |
| SpM18_ChORF1787_at    | -           | <i>spyM18_1787</i>                     | Phage                   | Phage proteins                         |                                        | -                                     | -                                         | 10.74                                 | 1.23                                  | 15.98                                 | -34.70                             | 0.0348741                   | <b>0.000434</b>             | 1.69E-12                      | <b>0.000225</b>               |
| SpM18_ChORF1498_x_at  | -           | <i>spyM18_1498</i>                     | Phage                   | Phage proteins                         |                                        | -                                     | -                                         | 10.45                                 | 30.20                                 | 18.48                                 | 23.96                              | 0.0030083                   | <b>4.01E-05</b>             | 9.05E-05                      | <b>0.000226</b>               |
| SpM1_ChORF2031_s_at   | -           | <i>spy2031</i>                         | Membrane transport      | Membrane transport                     | Unknown substrate membrane transport   | -                                     | -                                         | 10.22                                 | 143.68                                | 211.92                                | -48.40                             | 1.32E-14                    | <b>7.91E-06</b>             | 0.002611                      | 0.000833                      |
| M12_0889_at           | -           | <i>M12_0889</i>                        | Unknown                 | Hypothetical protein                   | Unknown                                | -                                     | -                                         | 10.17                                 | -0.10                                 | 6.67                                  | -4.23                              | 0.0031092                   | <b>4.14E-05</b>             | 0.0399274                     | 0.010138                      |
| SpM1_ChORF2118_s_at   | <i>tag</i>  | <i>spy2118</i>                         | DNA metabolism          | DNA replication, modification & repair | DNA replication, modification & repair | -                                     | -                                         | 10.16                                 | -16.26                                | -63.91                                | -85.27                             | 1.51E-09                    | <b>7.91E-06</b>             | 2.20E-16                      | <b>0.000225</b>               |
| SpM1_ChORF2091_s_at   | -           | <i>spy2091</i>                         | RNA metabolism          | Transcription regulation               |                                        | -                                     | -                                         | 10.13                                 | 126.90                                | 95.57                                 | 49.73                              | 1.08E-09                    | <b>7.91E-06</b>             | 5.69E-05                      | <b>0.000225</b>               |
| SpM18_ChORF1340_at    | <i>int</i>  | <i>spyM18_1340</i>                     | Unknown                 | Hypothetical protein                   | Unknown                                | -                                     | -                                         | 10.12                                 | -48.16                                | -45.95                                | -47.54                             | 0.0001159                   | <b>8.35E-06</b>             | 0.0001213                     | <b>0.000229</b>               |
| SpM1_ChORF0475_s_at   | <i>dgk</i>  | <i>spy0475</i>                         | Cell envelope           | Membrane lipids                        | Phospholipids biosynthesis             | -                                     | -                                         | 10.06                                 | -42.56                                | -91.36                                | -27.19                             | 1.24E-15                    | <b>7.91E-06</b>             | 0.0003191                     | <b>0.000256</b>               |
| SpM12_ChORF299-46_at  | -           | <i>SpyoM12_ChORF_299_46</i>            | Unknown                 | Hypothetical protein                   | Unknown                                | -                                     | -                                         | 9.97                                  | -38.70                                | -12.21                                | -31.55                             | 1.28E-05                    | <b>7.91E-06</b>             | 7.64E-06                      | <b>0.000225</b>               |
| SpM18_ChORF1133_s_at  | -           | <i>spyM18_1133</i>                     | Unknown                 | Hypothetical protein                   | Unknown                                | -                                     | -                                         | 9.92                                  | -1.19                                 | -2.16                                 | -12.12                             | 0.0001518                   | <b>8.54E-06</b>             | 0.0002606                     | <b>0.000246</b>               |
| SpM12_ChORF221-3_s_at | -           | <i>SpyoM12_ChORF_221_3</i>             | Unknown                 | Hypothetical protein                   | Unknown                                | -                                     | -                                         | 9.75                                  | -27.28                                | -6.65                                 | 15.51                              | 0.0050002                   | <b>6.56E-05</b>             | 0.0510008                     | 0.012695                      |
| SpM1_ChORF2051_s_at   | -           | <i>spy2051</i>                         | Membrane transport      | Membrane transport                     | Carbohydrate membrane transport        | -                                     | -                                         | 9.58                                  | 64.32                                 | 61.46                                 | -4.72                              | 0.0004305                   | <b>1.06E-05</b>             | 0.4969466                     | 0.100658                      |
| SpM1_ChORF0615_s_at   | <i>murN</i> | <i>spy0615</i>                         | Cell envelope           | Cell wall                              | Peptidoglycan biosynthesis             | -                                     | -                                         | 9.38                                  | -95.01                                | -362.45                               | -158.46                            | 3.15E-17                    | <b>7.91E-06</b>             | 1.34E-08                      | <b>0.000225</b>               |
| SpM1_ChORF1169_s_at   | -           | <i>spy1169</i>                         | Unknown                 | Hypothetical protein                   | Unknown                                | -                                     | -                                         | 9.35                                  | -7.92                                 | -7.91                                 | -8.59                              | 0.0006169                   | <b>1.22E-05</b>             | 0.0067375                     | 0.001995                      |
| SpM5_ChORFJ7578C-323_ | -           | <i>SpyoM5_ChORF_J7578C_e05.s1c_323</i> | Unknown                 | Hypothetical protein                   | Unknown                                | -                                     | -                                         | 9.18                                  | -1.79                                 | -1.77                                 | -1.16                              | 0.0100174                   | <b>0.000129</b>             | 0.4460681                     | 0.091513                      |
| SpM1_ChORF0199_s_at   | -           | <i>spy0199</i>                         | Mobile Genetic Element  | Mobile Genetic Element                 | IS Element-associated ORF              | -                                     | -                                         | 9.17                                  | -1.46                                 | 1.63                                  | 0.36                               | 1.53E-06                    | <b>7.91E-06</b>             | 7.94E-05                      | <b>0.000225</b>               |
| SpM12_ChORF272-9_s_at | -           | <i>SpyoM12_ChORF_272_9</i>             | Unknown                 | Hypothetical protein                   | Unknown                                | -                                     | -                                         | 9.12                                  | 178.95                                | 414.92                                | 64.25                              | 5.00E-18                    | <b>7.91E-06</b>             | 0.0042334                     | 0.001296                      |

| Probe Set Name*         | Gene Name   | Synonym                                   | Category                | Subcategory                    | Function                             | <i>Bacillus subtilis</i> † | <i>Staphylococcus aureus</i> † | Difference Time (30 - 0)‡ | Difference Time (60 - 0)‡ | Difference Time (90 - 0)‡ | Difference (Mut - WT)‡ | P-value (Time)§ | Q-value (Time)§ | P-value (Strain)§ | Q-value (Strain)§ |
|-------------------------|-------------|-------------------------------------------|-------------------------|--------------------------------|--------------------------------------|----------------------------|--------------------------------|---------------------------|---------------------------|---------------------------|------------------------|-----------------|-----------------|-------------------|-------------------|
| SpM1_ChORF1292_s_at     | <i>malM</i> | <i>spy1292</i>                            | Carbohydrate metabolism | Carbohydrate assimilation      | Carbohydrate assimilation            | -                          | -                              | 9.06                      | 144.95                    | 103.03                    | -37.34                 | 5.73E-07        | <b>7.91E-06</b> | 0.0574318         | 0.014164          |
| SpM18_ChORF2254_s_at    | -           | <i>spyM18_2254</i>                        | Mobile Genetic Element  | Mobile Genetic Element         | Transposase                          | -                          | -                              | 8.80                      | 3.98                      | 7.64                      | 1.62                   | 1.32E-05        | <b>7.91E-06</b> | 2.19E-05          | <b>0.000225</b>   |
| SpM1_ChORF0716_s_at     | <i>agaS</i> | <i>spy0716</i>                            | Carbohydrate metabolism | Carbohydrate assimilation      | Carbohydrate assimilation            | -                          | -                              | 8.80                      | 126.39                    | -4.81                     | 626.61                 | 0.0038653       | <b>5.12E-05</b> | 1.94E-43          | <b>0.000225</b>   |
| SpM1_ChORF1046_s_at     | -           | <i>spy1046</i>                            | Unknown                 | Hypothetical Cytosolic Protein | Unknown                              | Essential                  | Essential                      | 8.79                      | 24.26                     | 49.02                     | -12.60                 | 0.0001976       | <b>8.85E-06</b> | 0.0539079         | 0.013351          |
| SpM1_ChORF1220_s_at     | -           | <i>spy1220</i>                            | Unknown                 | Hypothetical protein           | Unknown                              | -                          | -                              | 8.74                      | 256.37                    | 64.29                     | 61.41                  | 4.71E-06        | <b>7.91E-06</b> | 0.064957          | 0.015831          |
| SpM1_ChORF0137_s_at     | <i>atoE</i> | <i>spy0137</i>                            | Membrane transport      | Membrane transport             | Unknown substrate membrane transport | -                          | -                              | 8.69                      | 12.54                     | 21.48                     | -1.61                  | 0.3451514       | 0.003979        | 0.9012879         | 0.166529          |
| SpM1_ChORF0555_s_at     | -           | <i>spy0555</i>                            | Phage                   | Phage proteins                 |                                      | -                          | -                              | 8.60                      | -0.20                     | 3.44                      | -1.79                  | 0.0154502       | <b>0.000197</b> | 0.3244252         | 0.068394          |
| SpM1_ChORF0544_s_at     | -           | <i>spy0544</i>                            | Unknown                 | Hypothetical protein           | Unknown                              | -                          | -                              | 8.44                      | -18.27                    | -18.16                    | -2.07                  | 3.10E-13        | <b>7.91E-06</b> | 7.70E-13          | <b>0.000225</b>   |
| SpM1_ChORF0870_s_at     | <i>fms</i>  | <i>spy0870</i>                            | Protein synthesis       | Protein folding & modification | Protein modification                 | -                          | -                              | 8.19                      | 20.35                     | 39.62                     | 204.32                 | 0.1445368       | 0.001714        | 1.24E-20          | <b>0.000225</b>   |
| SpM1_ChORF0505_s_at     | -           | <i>spy0505</i>                            | Unknown                 | Hypothetical protein           | Unknown                              | Essential                  | Essential                      | 8.16                      | -24.81                    | 79.75                     | -10.93                 | 1.69E-05        | <b>7.91E-06</b> | 0.860671          | 0.160373          |
| SpM1_ChORF1580_s_at     | -           | <i>spy1580</i>                            | Unknown                 | Hypothetical protein           | Unknown                              | -                          | -                              | 7.79                      | -48.59                    | -71.10                    | -14.98                 | 4.15E-11        | <b>7.91E-06</b> | 0.024643          | 0.006606          |
| SpM1_ChORF1566_s_at     | -           | <i>spy1566</i>                            | Unknown                 | Hypothetical cytosolic Protein | Unknown                              | -                          | -                              | 7.76                      | 64.27                     | 62.06                     | 77.87                  | 0.0004857       | <b>1.11E-05</b> | 3.15E-07          | <b>0.000225</b>   |
| SpM5_ChORF4P31a-86_s_at | -           | <i>SpyoM5_Chr ORF_4P31a0 1.w2c2309_86</i> | Unknown                 | Hypothetical protein           | Unknown                              | -                          | -                              | 7.72                      | -49.32                    | 7.53                      | -18.18                 | 0.0001181       | <b>8.35E-06</b> | 0.1376257         | 0.031163          |
| SpM5_ChORF4P31a-8_s_at  | -           | <i>SpyoM5_Chr ORF_4P31a0 1.w2c2309_8</i>  | Unknown                 | Hypothetical protein           | Unknown                              | -                          | -                              | 7.64                      | 4.95                      | 1.12                      | -0.23                  | 0.0003336       | <b>9.82E-06</b> | 0.0742271         | 0.017794          |
| SpM1_ChORF0953_s_at     | -           | <i>spy0953</i>                            | Phage                   | Phage proteins                 |                                      | -                          | -                              | 7.54                      | 18.89                     | 1.51                      | 25.56                  | 0.1599943       | 0.001893        | 5.07E-05          | <b>0.000225</b>   |
| SpM1_ChORF1944_s_at     | <i>cysE</i> | <i>spy1944</i>                            | Amino acid metabolism   | Amino acid biosynthesis        | Amino acid biosynthesis              | -                          | -                              | 7.49                      | -95.49                    | -473.75                   | -335.52                | 4.81E-08        | <b>7.91E-06</b> | 8.21E-07          | <b>0.000225</b>   |
| SpM1_ChORF1344_s_at     | -           | <i>spy1344</i>                            | Unknown                 | Hypothetical protein           | Unknown                              | -                          | -                              | 7.45                      | -21.63                    | 17.30                     | 25.03                  | 0.0194664       | <b>0.000247</b> | 0.010981          | 0.003115          |
| SpM3_ChORF0181_s_at     | <i>cbp</i>  | <i>SpyM3_0181</i>                         | Virulence               | Virulence interacting proteins | Cell surface protein                 | -                          | -                              | 7.35                      | 565.38                    | 1020.95                   | 520.47                 | 2.60E-17        | <b>7.91E-06</b> | 7.51E-12          | <b>0.000225</b>   |
| SpM1_ChORF1324_s_at     | -           | <i>spy1324</i>                            | Membrane transport      | Membrane transport             | Carbohydrate membrane transport      | -                          | -                              | 7.27                      | 17.46                     | 53.55                     | 3.64                   | 0.0002186       | <b>8.99E-06</b> | 0.6011651         | 0.118756          |
| SpM1_ChORF0133_at       | -           | <i>spy0133</i>                            | Unknown                 | Hypothetical cytosolic protein | Unknown                              | -                          | -                              | 7.16                      | 38.35                     | 118.66                    | 188.65                 | 2.70E-12        | <b>7.91E-06</b> | 5.95E-28          | <b>0.000225</b>   |
| SpM1_ChORF1484_s_at     | <i>xis</i>  | <i>spy1484</i>                            | Phage                   | Phage proteins                 |                                      | -                          | -                              | 7.07                      | 13.83                     | 2.99                      | 14.15                  | 0.1050256       | 0.001262        | 0.0006284         | <b>0.000313</b>   |
| SpM1_ChORF1557_s_at     | <i>msrA</i> | <i>spy1557</i>                            | Protein synthesis       | Protein folding & modification | Protein modification                 | -                          | -                              | 7.01                      | -0.53                     | -10.01                    | -21.04                 | 3.21E-12        | <b>7.91E-06</b> | 8.68E-14          | <b>0.000225</b>   |

| Probe Set Name*        | Gene Name    | Synonym                            | Category               | Subcategory                            | Function                               | <i>Bacillus subtilis</i> <sup>†</sup> | <i>Staphylococcus aureus</i> <sup>†</sup> | Difference Time (30 - 0) <sup>‡</sup> | Difference Time (60 - 0) <sup>‡</sup> | Difference Time (90 - 0) <sup>‡</sup> | Difference (Mut - WT) <sup>‡</sup> | P-value (Time) <sup>§</sup> | Q-value (Time) <sup>§</sup> | P-value (Strain) <sup>§</sup> | Q-value (Strain) <sup>§</sup> |
|------------------------|--------------|------------------------------------|------------------------|----------------------------------------|----------------------------------------|---------------------------------------|-------------------------------------------|---------------------------------------|---------------------------------------|---------------------------------------|------------------------------------|-----------------------------|-----------------------------|-------------------------------|-------------------------------|
| SpM1_ChORF0629_s_at    | <i>agaD</i>  | <i>spy0629</i>                     | Membrane transport     | Membrane transport                     | Carbohydrate membrane transport        | -                                     | -                                         | 6.81                                  | 42.80                                 | 76.29                                 | 3.24                               | 2.59E-09                    | <b>7.91E-06</b>             | 0.7242196                     | 0.139077                      |
| SpM1_ChORF1219_s_at    | -            | <i>spy1219</i>                     | Unknown                | Hypothetical protein                   | Unknown                                | -                                     | -                                         | 6.59                                  | 269.61                                | 100.35                                | 18.41                              | 2.49E-05                    | <b>7.91E-06</b>             | 0.6286408                     | 0.123351                      |
| SpM1_ChORF1642_s_at    | <i>luxS</i>  | <i>spy1642</i>                     | RNA metabolism         | Transcription regulation               |                                        | -                                     | -                                         | 6.54                                  | 28.79                                 | 1.74                                  | 20.39                              | 0.5717424                   | 0.006557                    | 0.1985123                     | 0.043848                      |
| SpM1_ChORF1453_s_at    | -            | <i>spy1453</i>                     | Phage                  | Phage proteins                         | Phage structural proteins              | -                                     | -                                         | 6.36                                  | -1.97                                 | -0.21                                 | -4.45                              | 0.007058                    | <b>9.17E-05</b>             | 0.0027007                     | 0.000858                      |
| SpM1_ChORF1075_at      | -            | <i>spy1075</i>                     | Mobile Genetic Element | Mobile Genetic Element                 | Transposase                            | -                                     | -                                         | 6.21                                  | -0.19                                 | 12.13                                 | -2.08                              | 0.0065951                   | <b>8.58E-05</b>             | 0.2935839                     | 0.062303                      |
| SpM3_ChORF0967_at      | -            | <i>SpyM3_0967</i>                  | Unknown                | Hypothetical protein                   | Unknown                                | -                                     | -                                         | 6.18                                  | 22.26                                 | 17.46                                 | 23.18                              | 9.46E-05                    | <b>8.21E-06</b>             | 1.54E-06                      | <b>0.000225</b>               |
| SpM1_ChORF1596_s_at    | -            | <i>spy1596</i>                     | RNA metabolism         | Transcription regulation               |                                        | -                                     | -                                         | 6.17                                  | -0.60                                 | 0.21                                  | 0.44                               | 0.012793                    | <b>0.000164</b>             | 0.5212126                     | 0.105088                      |
| SpM1_ChORF1662_s_at    | -            | <i>spy1659</i>                     | Stress adaptation      | Cold shock proteins                    | Cold shock proteins                    | -                                     | -                                         | 6.13                                  | -48.53                                | -33.32                                | -116.90                            | 0.0227812                   | <b>0.000287</b>             | 4.19E-11                      | <b>0.000225</b>               |
| SpM1_ChORF0135_at      | -            | <i>spy0135</i>                     | Unknown                | Hypothetical membrane protein          | Unknown                                | -                                     | -                                         | 6.01                                  | 0.07                                  | 0.69                                  | 0.86                               | 0.0718319                   | 0.000871                    | 0.5240175                     | 0.105352                      |
| SpM1_ChORF1255_s_at    | -            | <i>spy1255</i>                     | Membrane transport     | Membrane transport                     | Unknown substrate membrane transport   | Essential                             | -                                         | 5.98                                  | -11.22                                | 6.57                                  | 28.89                              | 0.1683658                   | 0.001991                    | 0.0001927                     | <b>0.000236</b>               |
| SpM12_ChORF286-28_s_at | -            | <i>SpyoM12_ChORF_286_28</i>        | Unknown                | Hypothetical protein                   | Unknown                                | -                                     | -                                         | 5.97                                  | -0.10                                 | 6.93                                  | -0.24                              | 0.0023704                   | <b>3.20E-05</b>             | 0.0310086                     | 0.008114                      |
| SpM1_ChORF1768_s_at    | -            | <i>spy1768</i>                     | Unknown                | Hypothetical membrane protein          | Unknown                                | -                                     | -                                         | 5.88                                  | 81.70                                 | 228.92                                | -32.64                             | 1.40E-12                    | <b>7.91E-06</b>             | 0.2248779                     | 0.048934                      |
| SpM12_ChORF299-4_at    | -            | <i>SpyoM12_ChORF_299_4</i>         | Unknown                | Hypothetical protein                   | Unknown                                | Essential                             | Essential                                 | 5.87                                  | -3.62                                 | -3.82                                 | 2.27                               | 0.0379499                   | <b>0.000472</b>             | 0.4700686                     | 0.095655                      |
| SpM1_ChORF1208_s_at    | -            | <i>spy1208</i>                     | Unknown                | Hypothetical membrane protein          | Unknown                                | -                                     | -                                         | 5.84                                  | -3.58                                 | -0.11                                 | 4.35                               | 1.12E-06                    | <b>7.91E-06</b>             | 0.0013626                     | <b>0.000487</b>               |
| SpM18_ChORF1493_at     | -            | <i>spyM18_1493</i>                 | Phage                  | Phage proteins                         |                                        | -                                     | -                                         | 5.69                                  | 29.54                                 | 20.57                                 | 21.80                              | 0.0054576                   | <b>7.14E-05</b>             | 0.0006148                     | <b>0.000311</b>               |
| SpM3_ChORF0341_s_at    | -            | <i>SpyM3_0341</i>                  | Unknown                | Hypothetical protein                   | Unknown                                | -                                     | -                                         | 5.67                                  | 23.35                                 | 30.53                                 | -33.54                             | 0.0430707                   | <b>0.000533</b>             | 2.30E-06                      | <b>0.000225</b>               |
| SpM1_ChORF1615_s_at    | <i>comFC</i> | <i>spy1615</i>                     | Membrane transport     | Membrane transport                     | Quorum sensing membrane transport      | -                                     | -                                         | 5.60                                  | 1.00                                  | 4.74                                  | 0.19                               | 0.0012421                   | <b>1.85E-05</b>             | 0.0713207                     | 0.017214                      |
| SpM1_ChORF0236_s_at    | <i>sms</i>   | <i>spy0236</i>                     | DNA metabolism         | DNA replication, modification & repair | DNA replication, modification & repair | -                                     | -                                         | 5.40                                  | -103.77                               | -115.49                               | -13.41                             | 7.47E-10                    | <b>7.91E-06</b>             | 0.2022905                     | 0.044599                      |
| SpM12_ChORF278-26_s_at | -            | <i>SpyoM12_ChORF_278_26</i>        | Unknown                | Hypothetical protein                   | Unknown                                | -                                     | -                                         | 5.38                                  | 17.28                                 | 5.03                                  | 19.57                              | 0.3397843                   | 0.003928                    | 0.0025446                     | 0.000817                      |
| SpM49_ChORF903-3_s_at  | -            | <i>SpyoM49_ChORF_sp001_0_903_3</i> | Unknown                | Hypothetical protein                   | Unknown                                | -                                     | -                                         | 5.35                                  | -12.13                                | 7.17                                  | 39.47                              | 0.3493401                   | 0.004025                    | 0.0002264                     | <b>0.000241</b>               |

| Probe Set Name*         | Gene Name         | Synonym                                | Category                | Subcategory                     | Function                             | <i>Bacillus subtilis</i> <sup>†</sup> | <i>Staphylococcus aureus</i> <sup>†</sup> | Difference Time (30 - 0) <sup>‡</sup> | Difference Time (60 - 0) <sup>‡</sup> | Difference Time (90 - 0) <sup>‡</sup> | Difference (Mut - WT) <sup>‡</sup> | P-value (Time) <sup>§</sup> | Q-value (Time) <sup>§</sup> | P-value (Strain) <sup>§</sup> | Q-value (Strain) <sup>§</sup> |
|-------------------------|-------------------|----------------------------------------|-------------------------|---------------------------------|--------------------------------------|---------------------------------------|-------------------------------------------|---------------------------------------|---------------------------------------|---------------------------------------|------------------------------------|-----------------------------|-----------------------------|-------------------------------|-------------------------------|
| SpM1_ChORF0768_s_at     | <i>pheS</i>       | <i>spy0768</i>                         | Protein synthesis       | tRNA synthetases                | tRNA synthetase                      | -                                     | -                                         | 5.27                                  | -41.82                                | -22.66                                | -54.14                             | 1.35E-06                    | <b>7.91E-06</b>             | 2.65E-13                      | <b>0.000225</b>               |
| SpM1_ChORF0258_s_at     | -                 | <i>spy0258</i>                         | Carbohydrate metabolism |                                 |                                      | -                                     | -                                         | 4.86                                  | 115.40                                | 625.14                                | 124.60                             | 2.39E-18                    | <b>7.91E-06</b>             | 3.65E-05                      | <b>0.000225</b>               |
| SpM49_ChORF7585-10_s_at | -                 | <i>SpyoM49_Chr ORF_sp001_0_7585_10</i> | Unknown                 | Hypothetical protein            | Unknown                              | -                                     | -                                         | 4.81                                  | 20.53                                 | 4.28                                  | 19.22                              | 0.1438172                   | 0.001707                    | 0.002066                      | 0.000682                      |
| SpM12_ChORF299-9_at     | -                 | <i>SpyoM12_Chr ORF_299_9</i>           | Unknown                 | Hypothetical protein            | Unknown                              | Essential                             | -                                         | 4.80                                  | -3.19                                 | -0.78                                 | 3.63                               | 0.002966                    | <b>3.96E-05</b>             | 0.0133322                     | 0.003733                      |
| M12_1466_s_at           | -                 | <i>M12_1466</i>                        | Unknown                 | Hypothetical protein            | Unknown                              | -                                     | -                                         | 4.75                                  | -15.11                                | -7.22                                 | -40.84                             | 0.0093037                   | <b>0.00012</b>              | 7.91E-12                      | <b>0.000225</b>               |
| SpM1_ChORF1283_s_at     | <i>pfk</i>        | <i>spy1283</i>                         | Carbohydrate metabolism | Bioenergetics                   | Glycolysis                           | -                                     | -                                         | 4.67                                  | -1066.65                              | -1087.29                              | 7.35                               | 6.37E-23                    | <b>7.91E-06</b>             | 0.9451425                     | 0.17381                       |
| SpM18_ChORF1329_s_at    | -                 | <i>spyM18_1329</i>                     | Unknown                 | Hypothetical protein            | Unknown                              | -                                     | -                                         | 4.48                                  | 13.65                                 | 40.50                                 | -5.25                              | 0.0005873                   | <b>1.20E-05</b>             | 0.3460952                     | 0.072657                      |
| SpM1_ChORF0947_s_at     | -                 | <i>spy0947</i>                         | Phage                   | Phage proteins                  |                                      | Essential                             | -                                         | 4.36                                  | 25.98                                 | 21.60                                 | 23.16                              | 6.71E-05                    | <b>8.07E-06</b>             | 1.29E-06                      | <b>0.000225</b>               |
| SpM1_ChORF1325_s_at     | -                 | <i>spy1325</i>                         | RNA metabolism          | Basic transcription machinery   | Basic transcription machinery        | -                                     | -                                         | 4.36                                  | 57.27                                 | 136.09                                | 44.65                              | 1.14E-13                    | <b>7.91E-06</b>             | 1.89E-05                      | <b>0.000225</b>               |
| SpM1_ChORF1328_s_at     | <i>bgIA.2</i>     | <i>spy1328</i>                         | Carbohydrate metabolism | Carbohydrate assimilation       | Carbohydrate assimilation            | -                                     | -                                         | 4.35                                  | 31.64                                 | 41.05                                 | 34.93                              | 0.0178315                   | <b>0.000227</b>             | 0.0005249                     | <b>0.000294</b>               |
| SpM1_ChORF0289_s_at     | <i>nifU, yurV</i> | <i>spy0289</i>                         | Cofactors               | Fe-sulfate cluster              | Fe-sulfate cluster biosynthesis      | -                                     | -                                         | 4.27                                  | -218.38                               | -361.15                               | -167.86                            | 1.00E-22                    | <b>7.91E-06</b>             | 2.61E-11                      | <b>0.000225</b>               |
| SpM1_ChORF2088_s_at     | -                 | <i>spy2088</i>                         | Membrane transport      | Membrane transport              | Amino acid membrane transport        | -                                     | -                                         | 4.25                                  | 21.51                                 | 182.37                                | 21.75                              | 1.32E-12                    | <b>7.91E-06</b>             | 0.0597611                     | 0.014676                      |
| SpM12_ChORF299-19_s_at  | -                 | <i>SpyoM12_Chr ORF_299_19</i>          | Unknown                 | Hypothetical protein            | Unknown                              | -                                     | -                                         | 3.86                                  | 24.10                                 | 10.74                                 | 1.07                               | 0.0256998                   | <b>0.000323</b>             | 0.8459786                     | 0.158139                      |
| SpM18_ChORF0547_s_at    | <i>silD</i>       | <i>spyM18_0547</i>                     | Virulence               | Virulence interacting proteins  | Lantibiotic, Quorum sensing          | -                                     | -                                         | 3.57                                  | 24.30                                 | 35.46                                 | -34.53                             | 0.0229766                   | <b>0.00029</b>              | 8.61E-06                      | <b>0.000225</b>               |
| SpM1_ChORF0150_s_at     | <i>ntpE</i>       | <i>spy0150</i>                         | Membrane transport      | Membrane transport              | Ion membrane transport               | -                                     | -                                         | 3.27                                  | 22.28                                 | 41.89                                 | 7.56                               | 0.0002563                   | <b>9.25E-06</b>             | 0.2913837                     | 0.061948                      |
| SpM1_ChORF0176_s_at     | -                 | <i>spy0176</i>                         | Membrane transport      | Membrane transport              | Unknown substrate membrane transport | -                                     | -                                         | 3.12                                  | 1838.07                               | 2640.73                               | 614.32                             | 1.77E-32                    | <b>7.91E-06</b>             | 6.06E-10                      | <b>0.000225</b>               |
| SpM18_ChORF0736_s_at    | -                 | <i>spyM18_0736</i>                     | Phage                   | Phage proteins                  |                                      | -                                     | -                                         | 3.06                                  | -3.47                                 | 9.84                                  | -13.00                             | 0.0622907                   | 0.000762                    | 0.0006083                     | <b>0.000309</b>               |
| SpM1_ChORF1610_s_at     | -                 | <i>spy1610</i>                         | Unknown                 | Hypothetical protein            | Unknown                              | -                                     | -                                         | 2.97                                  | 9.41                                  | 21.34                                 | 10.57                              | 2.07E-07                    | <b>7.91E-06</b>             | 0.0001713                     | <b>0.000233</b>               |
| SpM1_ChORF1684_s_at     | <i>glpK</i>       | <i>spy1684</i>                         | Carbohydrate metabolism | Carbohydrate central metabolism | Carbohydrate central metabolism      | -                                     | -                                         | 2.95                                  | 73.37                                 | 257.94                                | 116.56                             | 1.01E-17                    | <b>7.91E-06</b>             | 1.05E-10                      | <b>0.000225</b>               |
| SpM1_ChORF0405_s_at     | -                 | <i>spy0405</i>                         | Unknown                 | Hypothetical protein            | Unknown                              | -                                     | -                                         | 2.92                                  | 41.15                                 | 85.86                                 | -23.03                             | 3.39E-05                    | <b>7.93E-06</b>             | 0.1235424                     | 0.028357                      |
| SpM1_ChORF1461_x_at     | -                 | <i>spy1461</i>                         | Phage                   | Phage proteins                  |                                      | -                                     | -                                         | 2.80                                  | 4.20                                  | 0.01                                  | 0.04                               | 0.0343519                   | <b>0.000428</b>             | 0.1006711                     | 0.02357                       |
| SpM1_ChORF1947_s_at     | -                 | <i>spy1947</i>                         | Carbohydrate metabolism | Carbohydrate central metabolism |                                      | -                                     | -                                         | 2.62                                  | 7.17                                  | 23.46                                 | -4.53                              | 0.0387258                   | <b>0.000481</b>             | 0.2285761                     | 0.049677                      |



| Probe Set Name*         | Gene Name     | Synonym                                | Category              | Subcategory                    | Function                             | <i>Bacillus subtilis</i> <sup>†</sup> | <i>Staphylococcus aureus</i> <sup>†</sup> | Difference Time (30 - 0) <sup>‡</sup> | Difference Time (60 - 0) <sup>‡</sup> | Difference Time (90 - 0) <sup>‡</sup> | Difference (Mut - WT) <sup>‡</sup> | P-value (Time) <sup>§</sup> | Q-value (Time) <sup>§</sup> | P-value (Strain) <sup>§</sup> | Q-value (Strain) <sup>§</sup> |
|-------------------------|---------------|----------------------------------------|-----------------------|--------------------------------|--------------------------------------|---------------------------------------|-------------------------------------------|---------------------------------------|---------------------------------------|---------------------------------------|------------------------------------|-----------------------------|-----------------------------|-------------------------------|-------------------------------|
| SpM1_ChORF1286_s_at     | -             | <i>spy1286</i>                         | Membrane transport    | Membrane transport             | Unknown substrate membrane transport | -                                     | -                                         | 2.60                                  | 220.90                                | 327.83                                | 209.95                             | 1.71E-19                    | <b>7.91E-06</b>             | 1.11E-15                      | <b>0.000225</b>               |
| SpM5_ChORF270b-554_at   | -             | <i>SpyoM5_Chr ORF_270b10.p1t_554</i>   | Unknown               | Hypothetical protein           | Unknown                              | -                                     | -                                         | 2.53                                  | 13.69                                 | 9.08                                  | -15.44                             | 0.0699391                   | 0.000851                    | 0.0005095                     | <b>0.000291</b>               |
| SpM12_ChORF295-23_s_at  | -             | <i>spy0255</i>                         | Membrane transport    | Membrane transport             | Carbohydrate membrane transport      | -                                     | -                                         | 2.51                                  | 99.14                                 | 251.16                                | 72.25                              | 2.09E-12                    | <b>7.91E-06</b>             | 0.0002101                     | <b>0.000238</b>               |
| SpM49_ChORF7585-2_at    | -             | <i>SpyoM49_Chr ORF_sp001_0_7585_2</i>  | Unknown               | Hypothetical protein           | Unknown                              | -                                     | -                                         | 2.37                                  | 14.45                                 | 12.50                                 | -12.10                             | 0.0151337                   | <b>0.000193</b>             | 0.0060584                     | 0.001803                      |
| SpM3_ChORF1118_s_at     | -             | <i>SpyM3_1118</i>                      | Unknown               | Hypothetical protein           | Unknown                              | -                                     | -                                         | 2.36                                  | 17.88                                 | 9.17                                  | 3.44                               | 0.0204253                   | <b>0.000258</b>             | 0.3555137                     | 0.074501                      |
| SpM1_ChORF1673_at       | <i>proB</i>   | <i>spy1672</i>                         | Amino acid metabolism | Amino acid biosynthesis        | Amino acid biosynthesis              | -                                     | -                                         | 2.20                                  | 211.67                                | 382.34                                | -179.30                            | 1.33E-08                    | <b>7.91E-06</b>             | 7.82E-05                      | <b>0.000225</b>               |
| SpM1_ChORF1066_at       | -             | <i>spy1066</i>                         | Unknown               | Cytosolic Protein              | Unknown                              | -                                     | -                                         | 2.08                                  | 25.63                                 | 23.34                                 | -121.01                            | 0.1189279                   | 0.001421                    | 3.42E-18                      | <b>0.000225</b>               |
| SpM49_ChORF7585-6_at    | -             | <i>SpyoM49_Chr ORF_sp001_0_7585_6</i>  | Unknown               | Hypothetical protein           | Unknown                              | -                                     | -                                         | 2.07                                  | 2.02                                  | 4.43                                  | -1.94                              | 0.0074746                   | <b>9.70E-05</b>             | 0.0035188                     | 0.001091                      |
| SpM18_ChORF2020_at      | <i>salK</i>   | <i>spyM18_2020</i>                     | RNA metabolism        | Transcription regulation       | Signal transduction                  | -                                     | -                                         | 1.90                                  | 28.83                                 | 24.78                                 | 12.55                              | 9.67E-06                    | <b>7.91E-06</b>             | 0.0055319                     | 0.001653                      |
| SpM12_ChORF299-8_s_at   | -             | <i>SpyoM12_Chr ORF_299_8</i>           | Unknown               | Hypothetical protein           | Unknown                              | -                                     | -                                         | 1.78                                  | -0.42                                 | 1.74                                  | 0.51                               | 0.0816234                   | 0.000986                    | 0.0252194                     | 0.006741                      |
| SpM1_ChORF2190_s_at     | <i>sdhA</i>   | <i>spy2190</i>                         | Amino acid metabolism | Amino acid catabolism          | Amino acid catabolism                | -                                     | -                                         | 1.70                                  | 330.24                                | 272.46                                | 112.09                             | 1.35E-33                    | <b>7.91E-06</b>             | 1.45E-15                      | <b>0.000225</b>               |
| SpM49_ChORF7585-19_at   | -             | <i>SpyoM49_Chr ORF_sp001_0_7585_19</i> | Unknown               | Hypothetical protein           | Unknown                              | -                                     | -                                         | 1.67                                  | -0.07                                 | 0.15                                  | -5.82                              | 0.8423839                   | 0.009631                    | 1.14E-05                      | <b>0.000225</b>               |
| SpM1_ChORF0431_at       | -             | <i>spy0431</i>                         | Unknown               | Hypothetical protein           | Unknown                              | -                                     | -                                         | 1.65                                  | 22.17                                 | 24.44                                 | 1.39                               | 1.77E-09                    | <b>7.91E-06</b>             | 0.6224434                     | 0.122409                      |
| SpyM3_1439_at           | -             | <i>SpyM3_1439</i>                      | Phage                 | Phage proteins                 |                                      | -                                     | -                                         | 1.49                                  | 21.25                                 | 7.46                                  | 15.06                              | 0.138702                    | 0.00165                     | 0.0111727                     | 0.003159                      |
| SpM18_ChORF1209_x_at    | -             | <i>spyM18_1209</i>                     | Unknown               | Hypothetical protein           | Unknown                              | -                                     | -                                         | 1.46                                  | 11.13                                 | 15.85                                 | -0.09                              | 4.31E-05                    | <b>7.96E-06</b>             | 0.996685                      | 0.18205                       |
| SpM12_ChORF226-4_at     | -             | <i>SpyoM12_Chr ORF_226_4</i>           | Unknown               | Hypothetical protein           | Unknown                              | -                                     | -                                         | 1.42                                  | 18.88                                 | 29.19                                 | 14.06                              | 6.97E-07                    | <b>7.91E-06</b>             | 5.57E-05                      | <b>0.000225</b>               |
| SpM12_ChORF299-42_at    | -             | <i>SpyoM12_Chr ORF_299_42</i>          | Unknown               | Hypothetical protein           | Unknown                              | -                                     | -                                         | 1.18                                  | -42.82                                | -6.28                                 | -26.70                             | 3.21E-07                    | <b>7.91E-06</b>             | 1.29E-05                      | <b>0.000225</b>               |
| SpM1_ChORF0876_s_at     | <i>mvaK1</i>  | <i>spy0876</i>                         | Lipid metabolism      | Isoprenoids                    | Isoprenoid biosynthesis              | -                                     | -                                         | 1.17                                  | -69.70                                | 13.06                                 | -32.94                             | 0.0008564                   | <b>1.45E-05</b>             | 0.0275132                     | 0.00727                       |
| SpM5_ChORF125g-189_s_at | -             | <i>SpyoM12_Chr ORF_291_35</i>          | Unknown               | Hypothetical protein           | Unknown                              | -                                     | -                                         | 1.11                                  | -62.58                                | -93.57                                | -31.60                             | 8.60E-13                    | <b>7.91E-06</b>             | 0.0005338                     | <b>0.000295</b>               |
| M12_1772_x_at           | -             | <i>M12_1772</i>                        | Unknown               | Hypothetical protein           | Unknown                              | -                                     | -                                         | 1.11                                  | -6.35                                 | 3.92                                  | -17.04                             | 0.3433027                   | 0.003962                    | 0.0001707                     | <b>0.000233</b>               |
| SpM1_ChORF1375_s_at     | <i>nrdE.2</i> | <i>spy1375</i>                         | Nucleotides           | Nucleotides biosynthesis       | Purine biosynthesis                  | -                                     | -                                         | 1.05                                  | -309.77                               | -406.97                               | -301.23                            | 7.96E-24                    | <b>7.91E-06</b>             | 1.12E-20                      | <b>0.000225</b>               |
| SpM1_ChORF2087_s_at     | -             | <i>spy2087</i>                         | Unknown               | Hypothetical cytosolic Protein | Unknown                              | -                                     | -                                         | 1.04                                  | 23.48                                 | 260.76                                | 31.10                              | 6.15E-15                    | <b>7.91E-06</b>             | 0.0256051                     | 0.006838                      |

| Probe Set Name*        | Gene Name   | Synonym                                | Category                | Subcategory               | Function                       | <i>Bacillus subtilis</i> <sup>†</sup> | <i>Staphylococcus aureus</i> <sup>†</sup> | Difference Time (30 - 0) <sup>‡</sup> | Difference Time (60 - 0) <sup>‡</sup> | Difference Time (90 - 0) <sup>‡</sup> | Difference (Mut - WT) <sup>‡</sup> | P-value (Time) <sup>§</sup> | Q-value (Time) <sup>§</sup> | P-value (Strain) <sup>§</sup> | Q-value (Strain) <sup>§</sup> |
|------------------------|-------------|----------------------------------------|-------------------------|---------------------------|--------------------------------|---------------------------------------|-------------------------------------------|---------------------------------------|---------------------------------------|---------------------------------------|------------------------------------|-----------------------------|-----------------------------|-------------------------------|-------------------------------|
| SpM1_ChORF0604_s_at    | -           | <i>spy0604</i>                         | Unknown                 | Hypothetical protein      | Unknown                        | -                                     | -                                         | 0.92                                  | -187.81                               | -206.32                               | -79.51                             | 1.52E-11                    | <b>7.91E-06</b>             | 0.0002474                     | <b>0.000244</b>               |
| SpM1_ChORF0256_s_at    | -           | <i>spy0256</i>                         | Unknown                 | Hypothetical protein      | Unknown                        | -                                     | -                                         | 0.87                                  | 79.49                                 | 250.70                                | 60.05                              | 5.02E-13                    | <b>7.91E-06</b>             | 0.0006903                     | <b>0.000325</b>               |
| SpM12_ChORF299-38_at   | -           | <i>SpyoM12_Chr ORF_299_38</i>          | Unknown                 | Hypothetical protein      | Unknown                        | Essential                             | -                                         | 0.80                                  | 11.92                                 | 2.68                                  | 10.92                              | 0.5233878                   | 0.006006                    | 0.0110761                     | 0.003139                      |
| SpM49_ChORF7585-3_at   | -           | <i>SpyoM49_Chr ORF_sp001_0_7585_3</i>  | Unknown                 | Hypothetical protein      | Unknown                        | -                                     | -                                         | 0.74                                  | 6.76                                  | -0.01                                 | 0.02                               | 0.0353683                   | <b>0.00044</b>              | 0.799628                      | 0.151508                      |
| SpM1_ChORF1346_s_at    | -           | <i>spy1346</i>                         | RNA metabolism          | RNA modification          | RNA modification               | -                                     | -                                         | 0.64                                  | 0.57                                  | -1.63                                 | 122.38                             | 0.9541713                   | 0.010886                    | 2.00E-24                      | <b>0.000225</b>               |
| SpM1_ChORF1471_x_at    | -           | <i>spy1471</i>                         | Phage                   | Phage proteins            |                                | -                                     | -                                         | 0.60                                  | 20.01                                 | 6.35                                  | 19.75                              | 0.1259589                   | 0.001503                    | 0.001264                      | <b>0.000462</b>               |
| SpM49_ChORF7585-32_at  | -           | <i>SpyoM49_Chr ORF_sp001_0_7585_32</i> | Unknown                 | Hypothetical protein      | Unknown                        | -                                     | -                                         | 0.55                                  | -5.08                                 | 5.18                                  | -5.06                              | 1.33E-05                    | <b>7.91E-06</b>             | 3.41E-05                      | <b>0.000225</b>               |
| SpM49_ChORF7585-9_at   | -           | <i>SpyoM49_Chr ORF_sp001_0_7585_9</i>  | Unknown                 | Hypothetical protein      | Unknown                        | -                                     | -                                         | 0.52                                  | 12.37                                 | 10.08                                 | -4.19                              | 0.0052368                   | <b>6.86E-05</b>             | 0.1939098                     | 0.042967                      |
| SpM12_ChORF299-47_s_at | -           | <i>SpyoM12_Chr ORF_299_47</i>          | Unknown                 | Hypothetical protein      | Unknown                        | -                                     | -                                         | 0.47                                  | 1.00                                  | -0.09                                 | 0.18                               | 0.3433077                   | 0.003962                    | 0.0001933                     | <b>0.000236</b>               |
| SpM12_ChORF299-1_at    | -           | <i>SpyoM12_Chr ORF_299_1</i>           | Unknown                 | Hypothetical protein      | Unknown                        | -                                     | -                                         | 0.47                                  | -3.04                                 | -0.11                                 | 2.35                               | 0.005162                    | <b>6.76E-05</b>             | 0.0025802                     | 0.000826                      |
| SpM12_ChORF299-45_s_at | -           | <i>SpyoM12_Chr ORF_299_45</i>          | Unknown                 | Hypothetical protein      | Unknown                        | -                                     | -                                         | 0.41                                  | -34.60                                | -25.70                                | -19.25                             | 0.0018117                   | <b>2.51E-05</b>             | 0.018167                      | 0.005007                      |
| SpM18_ChORF1798_at     | -           | <i>spyM18_1798</i>                     | Phage                   | Phage proteins            |                                | -                                     | -                                         | 0.37                                  | -0.96                                 | 4.28                                  | -18.21                             | 0.5802431                   | 0.006651                    | 3.44E-14                      | <b>0.000225</b>               |
| SpM5_ChORF270b-6_at    | -           | <i>SpyoM5_Chr ORF_270b10.p1t_6</i>     | Unknown                 | Hypothetical protein      | Unknown                        | -                                     | -                                         | 0.27                                  | 1.30                                  | 36.15                                 | -83.39                             | 0.0462955                   | <b>0.000572</b>             | 7.83E-14                      | <b>0.000225</b>               |
| SpM12_ChORF175-2_s_at  | -           | <i>SpyoM12_Chr ORF_175_2</i>           | Unknown                 | Hypothetical protein      | Unknown                        | Essential                             | Essential                                 | 0.26                                  | 15.54                                 | 9.95                                  | 4.78                               | 0.0005977                   | <b>1.21E-05</b>             | 0.1764215                     | 0.039265                      |
| SpM1_ChORF1816_s_at    | <i>scrB</i> | <i>spy1816</i>                         | Carbohydrate metabolism | Carbohydrate assimilation | Carbohydrate assimilation      | -                                     | -                                         | 0.20                                  | -59.13                                | -71.52                                | 15.85                              | 1.88E-13                    | <b>7.91E-06</b>             | 0.0367399                     | 0.009431                      |
| SpM1_ChORF1479_s_at    | -           | <i>spy1479</i>                         | Phage                   | Phage proteins            |                                | -                                     | -                                         | 0.08                                  | 14.99                                 | 1.40                                  | 17.05                              | 0.3151156                   | 0.003644                    | 0.0043879                     | 0.001338                      |
| SpM1_ChORF0149_s_at    | <i>ntpK</i> | <i>spy0149</i>                         | Membrane transport      | Membrane transport        | Ion membrane transport         | -                                     | -                                         | 0.06                                  | 6.23                                  | 13.65                                 | 1.08                               | 0.0058862                   | <b>7.67E-05</b>             | 0.7343085                     | 0.140784                      |
| M12_1752_at            | -           | <i>M12_1752</i>                        | Unknown                 | Hypothetical protein      | Unknown                        | -                                     | -                                         | 0.02                                  | 2.97                                  | 2.19                                  | 4.29                               | 0.3408272                   | 0.003938                    | 0.0003586                     | <b>0.000262</b>               |
| SpM1_ChORF1084_at      | <i>srtT</i> | <i>spy1084</i>                         | Membrane transport      | Membrane transport        | Lantibiotic membrane transport | -                                     | -                                         | 0.01                                  | 10.57                                 | 12.97                                 | 10.71                              | 0.0012288                   | <b>1.84E-05</b>             | 8.06E-05                      | <b>0.000225</b>               |
| SpM18_ChORF1794_s_at   | -           | <i>spyM18_1794</i>                     | Phage                   | Phage proteins            |                                | Essential                             | Essential                                 | 0.00                                  | -6.11                                 | 33.81                                 | -68.44                             | 0.0322735                   | <b>0.000404</b>             | 1.09E-12                      | <b>0.000225</b>               |
| SpM49_ChORF7585-4_at   | -           | <i>SpyoM49_Chr ORF_sp001_0_7585_4</i>  | Unknown                 | Hypothetical protein      | Unknown                        | -                                     | -                                         | -0.04                                 | 20.67                                 | 17.66                                 | -10.01                             | 0.0048786                   | <b>6.41E-05</b>             | 0.0721586                     | 0.017369                      |
| SpM5_ChORF270b-343_at  | -           | <i>SpyoM5_Chr ORF_270b10.p1t_343</i>   | Unknown                 | Hypothetical protein      | Unknown                        | -                                     | -                                         | -0.05                                 | 8.81                                  | -1.01                                 | 8.37                               | 0.2468236                   | 0.002882                    | 0.0071807                     | 0.002115                      |
| SpM1_ChORF1462_x_at    | -           | <i>spy1462</i>                         | Phage                   | Phage proteins            |                                | -                                     | -                                         | -0.05                                 | 17.35                                 | 5.21                                  | 4.35                               | 0.0697012                   | 0.000849                    | 0.3374306                     | 0.07105                       |

| Probe Set Name*       | Gene Name   | Synonym                               | Category                | Subcategory                    | Function                             | <i>Bacillus subtilis</i> <sup>†</sup> | <i>Staphylococcus aureus</i> <sup>†</sup> | Difference Time (30 - 0) <sup>‡</sup> | Difference Time (60 - 0) <sup>‡</sup> | Difference Time (90 - 0) <sup>‡</sup> | Difference (Mut - WT) <sup>‡</sup> | P-value (Time) <sup>§</sup> | Q-value (Time) <sup>§</sup> | P-value (Strain) <sup>§</sup> | Q-value (Strain) <sup>§</sup> |
|-----------------------|-------------|---------------------------------------|-------------------------|--------------------------------|--------------------------------------|---------------------------------------|-------------------------------------------|---------------------------------------|---------------------------------------|---------------------------------------|------------------------------------|-----------------------------|-----------------------------|-------------------------------|-------------------------------|
| SpM1_ChORF1127_s_at   | -           | <i>spy1127</i>                        | Unknown                 | Hypothetical protein           | Unknown                              | -                                     | -                                         | -0.13                                 | -52.30                                | -26.83                                | -70.21                             | 3.84E-10                    | <b>7.91E-06</b>             | 1.96E-20                      | <b>0.000225</b>               |
| SpM18_ChORF1797_s_at  | -           | <i>spyM18_1797</i>                    | Phage                   | Phage proteins                 |                                      | -                                     | -                                         | -0.17                                 | -0.18                                 | 0.97                                  | -7.55                              | 0.913278                    | 0.010431                    | 2.94E-12                      | <b>0.000225</b>               |
| SpM3_ChORF0902_at     | -           | <i>SpyM3_0902</i>                     | Unknown                 | Hypothetical protein           | Unknown                              | -                                     | -                                         | -0.23                                 | 14.57                                 | 7.83                                  | 8.83                               | 0.2677                      | 0.003121                    | 0.1047964                     | 0.024422                      |
| SpM49_ChORF7585-8_at  | -           | <i>SpyoM49_Chr ORF_sp001_0_7585_8</i> | Unknown                 | Hypothetical protein           | Unknown                              | -                                     | -                                         | -0.25                                 | 17.92                                 | 8.76                                  | -7.37                              | 0.0747352                   | 0.000905                    | 0.195552                      | 0.043249                      |
| SpM12_ChORF299-2_x_at | -           | <i>SpyoM12_Chr ORF_299_2</i>          | Unknown                 | Hypothetical protein           | Unknown                              | -                                     | -                                         | -0.28                                 | -4.32                                 | -1.53                                 | 1.48                               | 0.0018499                   | <b>2.56E-05</b>             | 0.1563401                     | 0.03504                       |
| SpM1_ChORF2052_s_at   | -           | <i>spy2052</i>                        | Membrane transport      | Membrane transport             | Carbohydrate membrane transport      | -                                     | -                                         | -0.39                                 | 96.72                                 | 94.70                                 | -18.21                             | 3.55E-11                    | <b>7.91E-06</b>             | 0.058754                      | 0.014439                      |
| SpM12_ChORF299-10_at  | -           | <i>SpyoM12_Chr ORF_299_10</i>         | Unknown                 | Hypothetical protein           | Unknown                              | -                                     | -                                         | -0.40                                 | 14.26                                 | 13.68                                 | -1.49                              | 0.0010421                   | <b>1.63E-05</b>             | 0.7708489                     | 0.146531                      |
| SpM1_ChORF1912_s_at   | <i>salX</i> | <i>spy1912</i>                        | Membrane transport      | Membrane transport             | Lantibiotic membrane transport       | -                                     | -                                         | -0.40                                 | -32.53                                | -22.01                                | -10.29                             | 2.05E-05                    | <b>7.91E-06</b>             | 0.0454305                     | 0.011406                      |
| SpM1_ChORF2050_at     | -           | <i>spy2050</i>                        | Membrane transport      | Membrane transport             | Carbohydrate membrane transport      | -                                     | -                                         | -0.65                                 | 14.48                                 | 8.56                                  | -2.87                              | 0.0006031                   | <b>1.21E-05</b>             | 0.1435451                     | 0.03242                       |
| SpM1_ChORF1362_s_at   | <i>birA</i> | <i>spy1362</i>                        | Cell envelope           | Membrane lipids                | Fatty acid biosynthesis              | -                                     | -                                         | -0.67                                 | -200.90                               | -245.34                               | 9.73                               | 8.68E-20                    | <b>7.91E-06</b>             | 0.7236071                     | 0.13905                       |
| SpM1_ChORF0837_s_at   | -           | <i>spy0837</i>                        | Membrane transport      | Membrane transport             | Unknown substrate membrane transport | -                                     | -                                         | -0.67                                 | 207.04                                | 78.54                                 | -17.25                             | 1.43E-10                    | <b>7.91E-06</b>             | 0.3395365                     | 0.071408                      |
| SpM1_ChORF0135_s_at   | -           | <i>SpyoM12_Chr ORF_300_51</i>         | Unknown                 | Hypothetical membrane protein  | Unknown                              | -                                     | -                                         | -0.75                                 | 7.12                                  | 5.52                                  | 2.38                               | 0.0050281                   | <b>6.59E-05</b>             | 0.4583432                     | 0.093757                      |
| SpM1_ChORF0498_s_at   | -           | <i>spy0498</i>                        | Cofactors               | CoA                            | CoA biosynthesis                     | -                                     | -                                         | -0.77                                 | -51.66                                | -90.09                                | -54.74                             | 1.58E-21                    | <b>7.91E-06</b>             | 6.24E-16                      | <b>0.000225</b>               |
| SpM1_ChORF0175_s_at   | -           | <i>spy0175</i>                        | Carbohydrate metabolism | Carbohydrate assimilation      | Carbohydrate assimilation            | -                                     | -                                         | -0.84                                 | 834.01                                | 1372.04                               | 352.47                             | 6.41E-29                    | <b>7.91E-06</b>             | 6.09E-10                      | <b>0.000225</b>               |
| SpM1_ChORF0630_s_at   | <i>agaW</i> | <i>spy0630</i>                        | Membrane transport      | Membrane transport             | Carbohydrate membrane transport      | -                                     | -                                         | -0.86                                 | 15.05                                 | 21.70                                 | 3.07                               | 0.0028708                   | <b>3.84E-05</b>             | 0.4913827                     | 0.099588                      |
| M12_0056_at           | -           | <i>M12_0056</i>                       | Unknown                 | Hypothetical protein           | Unknown                              | -                                     | -                                         | -0.92                                 | 9.97                                  | 0.56                                  | 1.64                               | 0.2690132                   | 0.003133                    | 0.7685628                     | 0.146234                      |
| SpM1_ChORF0167_s_at   | <i>slo</i>  | <i>spy0167</i>                        | Virulence               | Virulence interacting proteins | Exotoxin                             | -                                     | -                                         | -1.06                                 | -67.67                                | -1112.73                              | -342.62                            | 1.27E-08                    | <b>7.91E-06</b>             | 0.0025627                     | 0.000822                      |
| SpM1_ChORF0407_s_at   | -           | <i>spy0407</i>                        | Unknown                 | Hypothetical protein           | Unknown                              | -                                     | -                                         | -1.39                                 | -14.64                                | -0.46                                 | -28.36                             | 0.7150797                   | 0.008188                    | 0.0107152                     | 0.003047                      |
| SpM12_ChORF251-8_at   | -           | <i>SpyoM12_Chr ORF_251_8</i>          | Unknown                 | Hypothetical protein           | Unknown                              | Essential                             | Essential                                 | -1.45                                 | 0.33                                  | -0.16                                 | 3.13                               | 0.0403348                   | <b>0.000501</b>             | 0.0651837                     | 0.015875                      |
| SpM1_ChORF1815_s_at   | <i>scrA</i> | <i>spy1815</i>                        | Membrane transport      | Membrane transport             | Carbohydrate membrane transport      | -                                     | -                                         | -1.55                                 | -12.11                                | 41.70                                 | -16.89                             | 1.90E-06                    | <b>7.91E-06</b>             | 0.0418789                     | 0.01058                       |
| SpM12_ChORF217-5_at   | -           | <i>SpyoM12_Chr ORF_217_5</i>          | Unknown                 | Hypothetical protein           | Unknown                              | -                                     | -                                         | -1.56                                 | 4.88                                  | 0.73                                  | 4.03                               | 0.1412432                   | 0.001679                    | 0.0238722                     | 0.006419                      |
| SpM1_ChORF1972_s_at   | <i>pulA</i> | <i>spy1972</i>                        | Carbohydrate metabolism | Carbohydrate assimilation      | Carbohydrate assimilation            | -                                     | -                                         | -1.65                                 | 256.01                                | 324.69                                | 58.41                              | 3.02E-20                    | <b>7.91E-06</b>             | 0.0010416                     | <b>0.000405</b>               |

| Probe Set Name*        | Gene Name    | Synonym                               | Category                | Subcategory                            | Function                               | <i>Bacillus subtilis</i> <sup>†</sup> | <i>Staphylococcus aureus</i> <sup>†</sup> | Difference Time (30 - 0) <sup>‡</sup> | Difference Time (60 - 0) <sup>‡</sup> | Difference Time (90 - 0) <sup>‡</sup> | Difference (Mut - WT) <sup>‡</sup> | P-value (Time) <sup>§</sup> | Q-value (Time) <sup>§</sup> | P-value (Strain) <sup>§</sup> | Q-value (Strain) <sup>§</sup> |
|------------------------|--------------|---------------------------------------|-------------------------|----------------------------------------|----------------------------------------|---------------------------------------|-------------------------------------------|---------------------------------------|---------------------------------------|---------------------------------------|------------------------------------|-----------------------------|-----------------------------|-------------------------------|-------------------------------|
| SpM1_ChORF0140_s_at    | -            | <i>spy0140</i>                        | Unknown                 | Hypothetical protein                   | Unknown                                | -                                     | -                                         | -1.66                                 | 15.29                                 | 2.14                                  | -0.14                              | 1.27E-05                    | <b>7.91E-06</b>             | 0.7504081                     | 0.143245                      |
| SpM18_ChORF1303_at     | -            | <i>spyM18_1303</i>                    | Phage                   | Phage proteins                         |                                        | -                                     | -                                         | -1.71                                 | -0.66                                 | -2.14                                 | 11.44                              | 0.8441622                   | 0.009646                    | 5.10E-10                      | <b>0.000225</b>               |
| SpM1_ChORF1333_s_at    | <i>obg</i>   | <i>spy1333</i>                        | Other                   | GTP-binding protein                    | GTP-binding                            | -                                     | -                                         | -1.75                                 | -212.44                               | -83.97                                | -81.34                             | 1.60E-05                    | <b>7.91E-06</b>             | 0.0280893                     | 0.007411                      |
| SpM1_ChORF1949_s_at    | -            | <i>spy1949</i>                        | Membrane transport      | Membrane transport                     | Unknown substrate membrane transport   | -                                     | -                                         | -1.76                                 | 6.63                                  | 32.02                                 | -7.00                              | 0.0608921                   | 0.000746                    | 0.3393361                     | 0.071408                      |
| SpM1_ChORF1957_s_at    | -            | <i>spy1957</i>                        | Unknown                 | Hypothetical cytosolic Protein         | Unknown                                | Essential                             | -                                         | -1.92                                 | 2.92                                  | -9.51                                 | 9.14                               | 0.4617476                   | 0.00531                     | 0.1301552                     | 0.029663                      |
| SpM5_ChORF270b-7_at    | -            | <i>SpyoM5_Chr ORF_270b10.p1t_7</i>    | Unknown                 | Hypothetical protein                   | Unknown                                | -                                     | -                                         | -1.98                                 | -0.34                                 | -1.45                                 | 5.72                               | 0.2798915                   | 0.003249                    | 2.34E-11                      | <b>0.000225</b>               |
| SpM3_ChORF0954_s_at    | -            | <i>SpyM3_0954</i>                     | Unknown                 | Hypothetical protein                   | Unknown                                | -                                     | -                                         | -2.03                                 | 1.06                                  | -13.85                                | 9.82                               | 0.0908874                   | 0.001097                    | 0.0525003                     | 0.013039                      |
| SpM5_ChORF125g-65_x_at | -            | <i>SpyoM5_Chr ORF_125g01.q1ch_65</i>  | Unknown                 | Hypothetical protein                   | Unknown                                | -                                     | -                                         | -2.09                                 | 5.14                                  | 2.21                                  | 6.18                               | 0.223545                    | 0.00262                     | 0.0183039                     | 0.005041                      |
| SpM1_ChORF0677_s_at    | -            | <i>spy0677</i>                        | Phage                   | Phage proteins                         | Unknown                                | -                                     | -                                         | -2.10                                 | 9.92                                  | -4.49                                 | 23.21                              | 0.395091                    | 0.004545                    | 9.23E-06                      | <b>0.000225</b>               |
| M12_1767_at            | -            | <i>M12_1767</i>                       | Phage                   | Phage proteins                         |                                        | -                                     | -                                         | -2.15                                 | -14.26                                | 6.37                                  | -16.54                             | 0.0328879                   | <b>0.000411</b>             | 0.0014403                     | <b>0.000508</b>               |
| SpM18_ChORF2063_at     | -            | <i>spyM18_2063</i>                    | Unknown                 | Hypothetical protein                   | Unknown                                | -                                     | -                                         | -2.20                                 | 1.74                                  | 15.19                                 | -22.23                             | 0.1378196                   | 0.001641                    | 4.50E-05                      | <b>0.000225</b>               |
| SpM1_ChORF2085_s_at    | <i>rhs.2</i> | <i>spy2085</i>                        | Carbohydrate metabolism | Carbohydrate central metabolism        | Carbohydrate central metabolism        | -                                     | -                                         | -2.44                                 | 68.90                                 | 441.95                                | 62.95                              | 2.47E-17                    | <b>7.91E-06</b>             | 0.0077276                     | 0.002265                      |
| SpM12_ChORF291-40_s_at | -            | <i>spyM18_2064</i>                    | Virulence               | Virulence interacting proteins         | Pyrogenic Toxin Superantigen           | -                                     | -                                         | -2.66                                 | 2.23                                  | 11.63                                 | 13.01                              | 9.94E-06                    | <b>7.91E-06</b>             | 0.0002002                     | <b>0.000237</b>               |
| SpM49_ChORF7585-7_at   | -            | <i>SpyoM49_Chr ORF_sp001_0_7585_7</i> | Unknown                 | Hypothetical protein                   | Unknown                                | -                                     | -                                         | -2.73                                 | 12.13                                 | 2.08                                  | -3.74                              | 0.2165376                   | 0.002542                    | 0.4790801                     | 0.097263                      |
| SpM18_ChORF1803_at     | -            | <i>spyM18_1803</i>                    | Phage                   | Phage proteins                         |                                        | -                                     | -                                         | -2.76                                 | 2.40                                  | -7.55                                 | 25.47                              | 0.359117                    | 0.004136                    | 1.92E-09                      | <b>0.000225</b>               |
| SpM18_ChORF1591_s_at   | -            | <i>spyM18_1591</i>                    | Unknown                 | Hypothetical protein                   | Unknown                                | -                                     | -                                         | -3.05                                 | 11.19                                 | -4.19                                 | 5.04                               | 0.2560083                   | 0.002988                    | 0.4471291                     | 0.091623                      |
| SpM18_ChORF1790_s_at   | -            | <i>spyM18_1790</i>                    | Phage                   | Phage proteins                         |                                        | -                                     | -                                         | -3.08                                 | -1.44                                 | -16.63                                | 10.23                              | 0.0635902                   | 0.000776                    | 0.0615089                     | 0.015084                      |
| SpM1_ChORF0685_s_at    | -            | <i>spy0685</i>                        | Phage                   | Phage proteins                         |                                        | -                                     | -                                         | -3.32                                 | 9.45                                  | 3.36                                  | 5.34                               | 0.1052688                   | 0.001264                    | 0.0965748                     | 0.022747                      |
| SpM1_ChORF2039_s_at    | <i>speB</i>  | <i>spy2039</i>                        | Virulence               | Virulence interacting proteins         | Exotoxin                               | -                                     | -                                         | -3.73                                 | -42.52                                | -18.81                                | 31.43                              | 0.0017553                   | <b>2.45E-05</b>             | 0.0007719                     | <b>0.000343</b>               |
| SpM1_ChORF1077_s_at    | -            | <i>spy1077</i>                        | DNA metabolism          | DNA replication, modification & repair | DNA replication, modification & repair | -                                     | -                                         | -4.04                                 | 3.49                                  | -11.04                                | 15.46                              | 0.4866963                   | 0.005591                    | 0.0111633                     | 0.003159                      |
| SpM1_ChORF0145_s_at    | -            | <i>spy0145</i>                        | RNA metabolism          | Transcription regulation               |                                        | -                                     | -                                         | -4.17                                 | -2.36                                 | -3.14                                 | -16.39                             | 0.968818                    | 0.011048                    | 0.0540307                     | 0.013372                      |
| SpM3_ChORF0788_s_at    | -            | <i>spyM18_1090</i>                    | Unknown                 | Hypothetical protein                   | Unknown                                | -                                     | -                                         | -4.18                                 | -62.73                                | -83.73                                | -15.77                             | 2.25E-11                    | <b>7.91E-06</b>             | 0.0531249                     | 0.013185                      |

| Probe Set Name*        | Gene Name | Synonym                                | Category                | Subcategory                    | Function                  | <i>Bacillus subtilis</i> † | <i>Staphylococcus aureus</i> † | Difference Time (30 - 0)‡ | Difference Time (60 - 0)‡ | Difference Time (90 - 0)‡ | Difference (Mut - WT)‡ | P-value (Time)§ | Q-value (Time)§ | P-value (Strain)§ | Q-value (Strain)§ |
|------------------------|-----------|----------------------------------------|-------------------------|--------------------------------|---------------------------|----------------------------|--------------------------------|---------------------------|---------------------------|---------------------------|------------------------|-----------------|-----------------|-------------------|-------------------|
| SpM18_ChORF1796_s_at   | -         | <i>spyM18_1796</i>                     | Phage                   | Phage proteins                 |                           | -                          | -                              | -4.39                     | -3.31                     | 53.69                     | -66.06                 | 1.67E-06        | <b>7.91E-06</b> | 3.76E-16          | <b>0.000225</b>   |
| SpM12_ChORF300-50_s_at | -         | <i>SpyoM12_Chr ORF_300_50</i>          | Unknown                 | Hypothetical protein           | Unknown                   | -                          | -                              | -4.51                     | 1.95                      | 4.59                      | 3.11                   | 0.0275825       | <b>0.000346</b> | 0.3094606         | 0.065435          |
| SpM1_ChORF1456_s_at    | -         | <i>spy1456</i>                         | Phage                   | Phage proteins                 |                           | -                          | -                              | -4.60                     | -1.90                     | -4.21                     | 8.08                   | 0.0002861       | <b>9.46E-06</b> | 3.04E-05          | <b>0.000225</b>   |
| SpM18_ChORF1789_s_at   | -         | <i>spyM18_1789</i>                     | Phage                   | Phage proteins                 |                           | Essential                  | Essential                      | -4.61                     | 5.31                      | -14.10                    | 18.55                  | 0.1089716       | 0.001305        | 0.0018485         | 0.000619          |
| SpM5_ChORF270b-528_at  | -         | <i>SpyoM5_Chr ORF_270b10.p1t_528</i>   | Unknown                 | Hypothetical protein           | Unknown                   | -                          | -                              | -4.62                     | -8.55                     | -3.17                     | -21.51                 | 0.9308647       | 0.010626        | 0.000555          | <b>0.000299</b>   |
| SpM12_ChORF296-2_s_at  | -         | <i>SpyoM12_Chr ORF_296_2</i>           | Unknown                 | Hypothetical protein           | Unknown                   | -                          | -                              | -4.75                     | 16.30                     | 6.35                      | 7.05                   | 0.0001333       | <b>8.43E-06</b> | 0.1346721         | 0.030573          |
| SpM1_ChORF1465_s_at    | -         | <i>spy1465</i>                         | Phage                   | Phage proteins                 | Phage structural proteins | -                          | -                              | -4.78                     | 2.06                      | -4.16                     | 5.67                   | 0.0717879       | 0.000871        | 0.0035258         | 0.001092          |
| SpM1_ChORF0472_s_at    | -         | <i>spy0472</i>                         | Unknown                 | Hypothetical Cytosolic Protein | Unknown                   | -                          | -                              | -4.85                     | -45.17                    | -102.19                   | 25.91                  | 3.11E-15        | <b>7.91E-06</b> | 0.0029073         | 0.000916          |
| SpM5_ChORF270b-585_at  | -         | <i>SpyoM5_Chr ORF_270b10.p1t_585</i>   | Unknown                 | Hypothetical protein           | Unknown                   | -                          | -                              | -4.97                     | 3.65                      | -11.13                    | 11.72                  | 0.2442927       | 0.002855        | 0.055169          | 0.013625          |
| SpM1_ChORF1950_s_at    | -         | <i>spy1950</i>                         | Carbohydrate metabolism | Carbohydrate assimilation      | Carbohydrate assimilation | -                          | -                              | -5.04                     | 0.06                      | 16.50                     | -8.37                  | 0.02412         | <b>0.000304</b> | 0.0324431         | 0.008433          |
| SpM1_ChORF0556_s_at    | -         | <i>spy0556</i>                         | Unknown                 | Hypothetical Cytosolic Protein | Unknown                   | -                          | -                              | -5.08                     | 0.82                      | -4.55                     | 3.20                   | 0.0062291       | <b>8.12E-05</b> | 0.0117763         | 0.003321          |
| SpM1_ChORF1441_s_at    | -         | <i>spy1441</i>                         | Phage                   | Phage proteins                 |                           | -                          | -                              | -5.11                     | 6.23                      | -4.28                     | 9.65                   | 0.0698837       | 0.000851        | 0.0002371         | <b>0.000243</b>   |
| SpyM3_1447_at          | -         | <i>SpyM3_1447</i>                      | Phage                   | Phage proteins                 |                           | -                          | -                              | -5.21                     | -11.56                    | 3.79                      | -10.20                 | 0.2016099       | 0.002372        | 0.0447137         | 0.011256          |
| SpyM3_1432_at          | -         | <i>SpyM3_1432</i>                      | Phage                   | Phage proteins                 |                           | -                          | -                              | -5.26                     | 4.44                      | 13.91                     | 22.36                  | 1.65E-05        | <b>7.91E-06</b> | 4.01E-09          | <b>0.000225</b>   |
| SpM1_ChORF0676_s_at    | -         | <i>spy0676</i>                         | Phage                   | Phage proteins                 |                           | -                          | -                              | -5.35                     | 6.22                      | -5.88                     | 18.90                  | 0.2707728       | 0.00315         | 1.28E-06          | <b>0.000225</b>   |
| SpM1_ChORF1657_s_at    | -         | <i>spy1656</i>                         | Unknown                 | Hypothetical protein           | Unknown                   | -                          | -                              | -5.39                     | -125.45                   | -110.29                   | 129.80                 | 0.0005166       | <b>1.13E-05</b> | 2.43E-06          | <b>0.000225</b>   |
| SpM12_ChORF299-3_s_at  | -         | <i>SpyoM12_Chr ORF_299_3</i>           | Unknown                 | Hypothetical protein           | Unknown                   | -                          | -                              | -5.42                     | 10.30                     | -0.10                     | 4.78                   | 0.3071636       | 0.003558        | 0.3975108         | 0.08232           |
| SpM1_ChORF1532_s_at    | -         | <i>spy1532</i>                         | Unknown                 | Hypothetical protein           | Unknown                   | -                          | -                              | -5.49                     | 2.45                      | -11.82                    | 9.49                   | 0.2312773       | 0.002708        | 0.0992594         | 0.023317          |
| SpM1_ChORF2040_at      | -         | <i>spy2040</i>                         | Unknown                 | Hypothetical protein           | Unknown                   | -                          | -                              | -5.50                     | -8.66                     | -7.89                     | 1.12                   | 8.93E-05        | <b>8.18E-06</b> | 0.4733617         | 0.096158          |
| SpM18_ChORF1786_at     | -         | <i>spyM18_1786</i>                     | Unknown                 | Hypothetical protein           | Unknown                   | -                          | -                              | -5.51                     | -3.84                     | -6.08                     | 6.33                   | 0.0011317       | <b>1.73E-05</b> | 2.58E-12          | <b>0.000225</b>   |
| SpM49_ChORF7585-31_at  | -         | <i>SpyoM49_Chr ORF_sp001_0_7585_31</i> | Unknown                 | Hypothetical protein           | Unknown                   | -                          | -                              | -5.51                     | -9.27                     | -8.47                     | 0.74                   | 7.02E-06        | <b>7.91E-06</b> | 0.0002746         | <b>0.000248</b>   |
| M12_1829_s_at          | -         | <i>M12_1829</i>                        | Unknown                 | Hypothetical protein           | Unknown                   | -                          | -                              | -5.73                     | 9.33                      | -4.49                     | 7.93                   | 0.1774658       | 0.002097        | 0.1477166         | 0.033298          |
| SpM5_ChORF169a-196_at  | -         | <i>SpyoM5_Chr ORF_169a5.p1t_196</i>    | Unknown                 | Hypothetical protein           | Unknown                   | -                          | -                              | -5.75                     | 13.13                     | 11.41                     | 10.90                  | 0.0041519       | <b>5.49E-05</b> | 0.0335215         | 0.008681          |

| Probe Set Name*         | Gene Name   | Synonym                            | Category                | Subcategory                    | Function                       | <i>Bacillus subtilis</i> <sup>†</sup> | <i>Staphylococcus aureus</i> <sup>†</sup> | Difference Time (30 - 0) <sup>‡</sup> | Difference Time (60 - 0) <sup>‡</sup> | Difference Time (90 - 0) <sup>‡</sup> | Difference (Mut - WT) <sup>‡</sup> | P-value (Time) <sup>§</sup> | Q-value (Time) <sup>§</sup> | P-value (Strain) <sup>§</sup> | Q-value (Strain) <sup>§</sup> |
|-------------------------|-------------|------------------------------------|-------------------------|--------------------------------|--------------------------------|---------------------------------------|-------------------------------------------|---------------------------------------|---------------------------------------|---------------------------------------|------------------------------------|-----------------------------|-----------------------------|-------------------------------|-------------------------------|
| SpM3_ChORF1098_at       | <i>cadA</i> | <i>SpyM3_1098</i>                  | Membrane transport      | Membrane transport             | Metal ion membrane transport   | -                                     | -                                         | -5.96                                 | 0.92                                  | -14.18                                | 12.97                              | 0.2017079                   | 0.002372                    | 0.0315539                     | 0.008232                      |
| SpM12_ChORF290-9_s_at   | -           | <i>SpyoM12_ChORF_290_9</i>         | Unknown                 | Hypothetical protein           | Unknown                        | -                                     | -                                         | -6.03                                 | 9.08                                  | -2.43                                 | 3.54                               | 0.1428184                   | 0.001696                    | 0.8212391                     | 0.155078                      |
| SpM18_ChORF1795_s_at    | -           | <i>spyM18_1795</i>                 | Unknown                 | Hypothetical protein           | Unknown                        | -                                     | -                                         | -6.03                                 | 1.07                                  | -7.91                                 | 26.70                              | 0.5878184                   | 0.006735                    | 6.49E-08                      | <b>0.000225</b>               |
| SpM1_ChORF0190_s_at     | -           | <i>spy0190</i>                     | Unknown                 | Hypothetical cytosolic protein | Unknown                        | -                                     | -                                         | -6.05                                 | 284.09                                | 779.54                                | 51.34                              | 6.04E-19                    | <b>7.91E-06</b>             | 0.1749355                     | 0.038959                      |
| SpM1_ChORF0927_s_at     | <i>apt</i>  | <i>spy0927</i>                     | Nucleotides             | Nucleotides metabolism         | Purine salvage                 | -                                     | -                                         | -6.06                                 | -93.79                                | -84.84                                | -41.34                             | 8.37E-09                    | <b>7.91E-06</b>             | 0.0004812                     | <b>0.000286</b>               |
| SpM1_ChORF2034_s_at     | -           | <i>spy2034</i>                     | Unknown                 | Hypothetical cytosolic Protein | Unknown                        | -                                     | -                                         | -6.24                                 | -66.93                                | -66.95                                | -54.15                             | 0.0001279                   | <b>8.40E-06</b>             | 8.34E-05                      | <b>0.000226</b>               |
| SpM1_ChORF1999_at       | -           | <i>spy1999</i>                     | Unknown                 | Hypothetical protein           | Unknown                        | -                                     | -                                         | -6.25                                 | -7.07                                 | -9.99                                 | 15.77                              | 0.0301032                   | <b>0.000377</b>             | 2.08E-08                      | <b>0.000225</b>               |
| SpM1_ChORF1085_at       | <i>srtF</i> | <i>spy1085</i>                     | Membrane transport      | Membrane transport             | Lantibiotic membrane transport | Essential                             | Essential                                 | -6.31                                 | -35.56                                | -39.07                                | -20.43                             | 6.08E-10                    | <b>7.91E-06</b>             | 6.39E-05                      | <b>0.000225</b>               |
| SpM5_ChORF223b-1_s_at   | -           | <i>SpyoM5_ChORF_223b3.p1t_1</i>    | Unknown                 | Hypothetical protein           | Unknown                        | -                                     | -                                         | -6.48                                 | 4.15                                  | -16.34                                | 14.38                              | 0.1025207                   | 0.001234                    | 0.030818                      | 0.00807                       |
| SpM3_ChORF1081_s_at     | -           | <i>SpyM3_1081</i>                  | Unknown                 | Hypothetical protein           | Unknown                        | -                                     | -                                         | -6.62                                 | 2.63                                  | -16.71                                | 12.11                              | 0.0622003                   | 0.000762                    | 0.0546721                     | 0.013515                      |
| SpM5_ChORF270b-135_s_at | -           | <i>SpyoM5_ChORF_270b10.p1t_135</i> | Unknown                 | Hypothetical protein           | Unknown                        | -                                     | -                                         | -6.64                                 | -2.16                                 | 1.18                                  | 7.97                               | 0.0956173                   | 0.001153                    | 0.0086857                     | 0.002523                      |
| SpM18_ChORF0453_at      | -           | <i>spyM18_0453</i>                 | Unknown                 | Hypothetical protein           | Unknown                        | -                                     | -                                         | -6.68                                 | 3.25                                  | -13.85                                | 11.57                              | 0.1777135                   | 0.002098                    | 0.0729959                     | 0.017546                      |
| SpM12_ChORF298-25_s_at  | -           | <i>SpyoM12_ChORF_298_25</i>        | Unknown                 | Hypothetical protein           | Unknown                        | Essential                             | Essential                                 | -6.77                                 | 1.39                                  | -5.74                                 | 2.09                               | 0.1873055                   | 0.002208                    | 0.485945                      | 0.098543                      |
| M12_1769_at             | -           | <i>M12_1769</i>                    | Unknown                 | Hypothetical protein           | Unknown                        | -                                     | -                                         | -6.79                                 | -13.67                                | 0.96                                  | -10.14                             | 0.0169219                   | <b>0.000216</b>             | 0.0259011                     | 0.006901                      |
| SpM1_ChORF1914_s_at     | <i>salB</i> | <i>spy1914</i>                     | Virulence               | Virulence interacting proteins | Lantibiotic, Quorum sensing    | -                                     | -                                         | -6.80                                 | -19.37                                | -19.03                                | 1.14                               | 4.37E-07                    | <b>7.91E-06</b>             | 0.8872188                     | 0.164709                      |
| SpM12_ChORF285-3_s_at   | -           | <i>SpyoM12_ChORF_285_3</i>         | Unknown                 | Hypothetical protein           | Unknown                        | -                                     | -                                         | -6.89                                 | -0.69                                 | 0.54                                  | 1.51                               | 0.0025242                   | <b>3.40E-05</b>             | 0.7473203                     | 0.142811                      |
| SpM18_ChORF1158_s_at    | -           | <i>spyM18_1158</i>                 | Unknown                 | Hypothetical protein           | Unknown                        | -                                     | -                                         | -6.93                                 | -41.47                                | -40.45                                | 17.45                              | 2.92E-05                    | <b>7.91E-06</b>             | 0.0284888                     | 0.007505                      |
| SpM1_ChORF0177_s_at     | -           | <i>spy0177</i>                     | Carbohydrate metabolism | Carbohydrate assimilation      | Carbohydrate assimilation      | -                                     | -                                         | -7.00                                 | 1562.75                               | 2578.52                               | 554.70                             | 1.45E-31                    | <b>7.91E-06</b>             | 4.68E-09                      | <b>0.000225</b>               |
| SpyM3_1258_at           | -           | <i>SpyM3_1258</i>                  | Phage                   | Phage proteins                 |                                | -                                     | -                                         | -7.21                                 | -2.39                                 | -13.43                                | 17.61                              | 0.1886695                   | 0.002223                    | 0.0001444                     | <b>0.00023</b>                |
| SpM1_ChORF1460_s_at     | -           | <i>spy1460</i>                     | Phage                   | Phage proteins                 |                                | -                                     | -                                         | -7.26                                 | 0.29                                  | -6.63                                 | 10.04                              | 0.1089978                   | 0.001305                    | 0.0001712                     | <b>0.000233</b>               |
| SpM18_ChORF0551_s_at    | <i>silE</i> | <i>spyM18_0551</i>                 | Virulence               | Virulence interacting proteins | Lantibiotic, Quorum sensing    | -                                     | -                                         | -7.34                                 | 8.91                                  | -4.14                                 | 7.35                               | 0.2461041                   | 0.002875                    | 0.2185024                     | 0.047843                      |
| SpM12_ChORF299-44_at    | -           | <i>SpyoM12_ChORF_299_44</i>        | Unknown                 | Hypothetical protein           | Unknown                        | -                                     | -                                         | -7.34                                 | -13.66                                | -13.63                                | -2.90                              | 0.0001697                   | <b>8.67E-06</b>             | 0.1194752                     | 0.027518                      |
| SpM3_ChORF0964_at       | -           | <i>SpyM3_0964</i>                  | Unknown                 | Hypothetical protein           | Unknown                        | -                                     | -                                         | -7.35                                 | -3.53                                 | -9.69                                 | 32.63                              | 0.7545059                   | 0.008635                    | 5.85E-07                      | <b>0.000225</b>               |

| Probe Set Name*         | Gene Name        | Synonym                                 | Category               | Subcategory                    | Function                             | <i>Bacillus subtilis</i> <sup>†</sup> | <i>Staphylococcus aureus</i> <sup>†</sup> | Difference Time (30 - 0) <sup>‡</sup> | Difference Time (60 - 0) <sup>‡</sup> | Difference Time (90 - 0) <sup>‡</sup> | Difference (Mut - WT) <sup>‡</sup> | P-value (Time) <sup>§</sup> | Q-value (Time) <sup>§</sup> | P-value (Strain) <sup>§</sup> | Q-value (Strain) <sup>§</sup> |
|-------------------------|------------------|-----------------------------------------|------------------------|--------------------------------|--------------------------------------|---------------------------------------|-------------------------------------------|---------------------------------------|---------------------------------------|---------------------------------------|------------------------------------|-----------------------------|-----------------------------|-------------------------------|-------------------------------|
| SpM18_ChORF0740_x_at    | -                | <i>spyM18_0740</i>                      | Phage                  | Phage proteins                 |                                      | -                                     | -                                         | -7.36                                 | -31.90                                | -26.27                                | -24.63                             | 1.21E-06                    | <b>7.91E-06</b>             | 2.12E-07                      | <b>0.000225</b>               |
| SpM1_ChORF1595_s_at     | -                | <i>spy1595</i>                          | Membrane transport     | Membrane transport             | Carbohydrate membrane transport      | -                                     | -                                         | -7.40                                 | 118.27                                | 347.87                                | 175.66                             | 8.85E-21                    | <b>7.91E-06</b>             | 3.29E-15                      | <b>0.000225</b>               |
| M12_0158_at             | -                | <i>M12_0158</i>                         | Unknown                | Hypothetical protein           | Unknown                              | -                                     | -                                         | -7.44                                 | 8.46                                  | -3.39                                 | 7.85                               | 0.2735172                   | 0.00318                     | 0.2432546                     | 0.052575                      |
| SpM12_ChORF298-21_at    | -                | <i>SpyoM12_ChORF_298_21</i>             | Unknown                | Hypothetical protein           | Unknown                              | -                                     | -                                         | -7.49                                 | -11.82                                | -11.73                                | -9.26                              | 0.2828056                   | 0.003281                    | 0.0268784                     | 0.007129                      |
| SpM18_ChORF0886_s_at    | <i>epuA</i>      | <i>spyM18_0886</i>                      | Unknown                | Hypothetical protein           | Unknown                              | -                                     | -                                         | -7.62                                 | 7.21                                  | -7.68                                 | 10.23                              | 0.2183918                   | 0.002562                    | 0.0902189                     | 0.021336                      |
| SpM1_ChORF0288_s_at     | <i>nifS, csd</i> | <i>spy0288</i>                          | Cofactors              | Fe-sulfate cluster             | Fe-sulfate cluster biosynthesis      | -                                     | -                                         | -7.72                                 | -242.39                               | -365.44                               | -135.09                            | 1.17E-18                    | <b>7.91E-06</b>             | 1.04E-06                      | <b>0.000225</b>               |
| SpM3_ChORF0986_x_at     | -                | <i>SpyM3_0986</i>                       | Unknown                | Hypothetical protein           | Unknown                              | -                                     | -                                         | -7.80                                 | 15.84                                 | -9.13                                 | 0.19                               | 0.0358279                   | <b>0.000446</b>             | 0.8957931                     | 0.165842                      |
| SpM5_ChORF169a-227_s_at | -                | <i>SpyoM5_ChORF_169a5.p1t_227</i>       | Unknown                | Hypothetical protein           | Unknown                              | -                                     | -                                         | -8.12                                 | 3.48                                  | -9.92                                 | 11.25                              | 0.2890925                   | 0.003352                    | 0.0697696                     | 0.016863                      |
| SpyM3_1308_x_at         | -                | <i>SpyM3_1308</i>                       | Phage                  | Phage proteins                 |                                      | -                                     | -                                         | -8.16                                 | -0.99                                 | -18.99                                | 15.94                              | 0.0702944                   | 0.000854                    | 0.0095916                     | 0.002756                      |
| SpM1_ChORF1452_s_at     | -                | <i>spy1452</i>                          | Phage                  | Phage proteins                 | Phage structural proteins            | -                                     | -                                         | -8.37                                 | 2.20                                  | -17.69                                | 11.39                              | 0.0541398                   | 0.000666                    | 0.0463378                     | 0.011607                      |
| SpM5_ChORF125g-147_at   | -                | <i>SpyoM5_ChORF_125g01.q1ch_147</i>     | Unknown                | Hypothetical protein           | Unknown                              | -                                     | -                                         | -8.71                                 | 1.33                                  | -12.99                                | 12.75                              | 0.2743497                   | 0.003188                    | 0.0365182                     | 0.009381                      |
| SpM1_ChORF1080_s_at     | <i>srtl</i>      | <i>spy1080</i>                          | Virulence              | Virulence interacting proteins | Lantibiotic, Quorum sensing          | -                                     | -                                         | -8.82                                 | 5.84                                  | -7.84                                 | 11.97                              | 0.2314446                   | 0.002708                    | 0.0274695                     | 0.007264                      |
| SpM1_ChORF0180_s_at     | -                | <i>spy0180</i>                          | Unknown                | Hypothetical protein           | Unknown                              | -                                     | -                                         | -8.92                                 | 6.74                                  | 47.73                                 | 7.25                               | 5.91E-16                    | <b>7.91E-06</b>             | 0.003495                      | 0.001084                      |
| SpM1_ChORF1952_s_at     | -                | <i>spy1952</i>                          | Unknown                | Hypothetical protein           | Unknown                              | -                                     | -                                         | -9.04                                 | -16.13                                | -3.07                                 | -5.86                              | 0.2695046                   | 0.003137                    | 0.2653589                     | 0.056793                      |
| SpM5_ChORF4P31a-199_a   | -                | <i>SpyoM5_ChORF_4P31a0.1.w2c2309_19</i> | Unknown                | Hypothetical protein           | Unknown                              | -                                     | -                                         | -9.40                                 | -1.79                                 | -2.48                                 | 0.97                               | 0.0058222                   | <b>7.59E-05</b>             | 0.7124344                     | 0.137339                      |
| SpM18_ChORF0635_s_at    | -                | <i>spyM18_0635</i>                      | Mobile Genetic Element | Mobile Genetic Element         | Transposase                          | -                                     | -                                         | -9.46                                 | 12.42                                 | 11.10                                 | 10.01                              | 1.62E-06                    | <b>7.91E-06</b>             | 0.0086274                     | 0.002512                      |
| M12_0138_s_at           | -                | <i>M12_0138</i>                         | Unknown                | Hypothetical protein           | Unknown                              | -                                     | -                                         | -9.92                                 | 3.63                                  | -12.23                                | 10.46                              | 0.1459383                   | 0.00173                     | 0.0766694                     | 0.018342                      |
| SpM18_ChORF1460_s_at    | -                | <i>spyM18_1460</i>                      | Phage                  | Phage proteins                 |                                      | -                                     | -                                         | -10.19                                | -1.32                                 | -17.90                                | 15.52                              | 0.1332765                   | 0.001588                    | 0.0152808                     | 0.004252                      |
| SpM1_ChORF1673_s_at     | -                | <i>spy1673</i>                          | Membrane transport     | Membrane transport             | Unknown substrate membrane transport | -                                     | -                                         | -10.22                                | 277.20                                | 455.87                                | -239.24                            | 1.27E-12                    | <b>7.91E-06</b>             | 2.03E-07                      | <b>0.000225</b>               |
| SpM1_ChORF1474_s_at     | -                | <i>spy1474</i>                          | Phage                  | Phage proteins                 |                                      | -                                     | -                                         | -10.22                                | 17.31                                 | 1.44                                  | 19.04                              | 0.0257547                   | <b>0.000323</b>             | 0.0013402                     | <b>0.000482</b>               |
| SpM1_ChORF0839_s_at     | -                | <i>spy0839</i>                          | Cell envelope          | Membrane lipids                | Phospholipids biosynthesis           | -                                     | -                                         | -10.33                                | 328.99                                | 314.38                                | -139.24                            | 4.55E-19                    | <b>7.91E-06</b>             | 6.48E-08                      | <b>0.000225</b>               |
| SpM1_ChORF0578_s_at     | -                | <i>spy0578</i>                          | Unknown                | Hypothetical protein           | Unknown                              | -                                     | -                                         | -10.40                                | 1.28                                  | -15.53                                | 12.60                              | 0.1144495                   | 0.001368                    | 0.0401303                     | 0.010183                      |

| Probe Set Name*        | Gene Name   | Synonym                                | Category                | Subcategory                   | Function                      | <i>Bacillus subtilis</i> † | <i>Staphylococcus aureus</i> † | Difference Time (30 - 0)‡ | Difference Time (60 - 0)‡ | Difference Time (90 - 0)‡ | Difference (Mut - WT)‡ | P-value (Time)§ | Q-value (Time)§ | P-value (Strain)§ | Q-value (Strain)§ |
|------------------------|-------------|----------------------------------------|-------------------------|-------------------------------|-------------------------------|----------------------------|--------------------------------|---------------------------|---------------------------|---------------------------|------------------------|-----------------|-----------------|-------------------|-------------------|
| SpM12_ChORF257-17_s_at | -           | <i>SpyoM12_Chr ORF_257_17</i>          | Unknown                 | Hypothetical protein          | Unknown                       | Essential                  | Essential                      | -10.45                    | 1.23                      | -15.00                    | 12.76                  | 0.1235208       | 0.001474        | 0.0272017         | 0.007209          |
| SpM18_ChORF0607_s_at   | -           | <i>spyM18_0607</i>                     | Unknown                 | Hypothetical protein          | Unknown                       | -                          | -                              | -10.54                    | -2.24                     | -4.52                     | 10.71                  | 0.5122195       | 0.005881        | 0.0510053         | 0.012695          |
| SpM1_ChORF1818_s_at    | <i>nusB</i> | <i>spy1818</i>                         | RNA metabolism          | Basic transcription machinery | Basic transcription machinery | -                          | -                              | -10.54                    | 396.71                    | 366.83                    | 44.49                  | 1.02E-11        | <b>7.91E-06</b> | 0.2339654         | 0.050701          |
| SpyM3_1824_at          | -           | <i>SpyM3_1824</i>                      | Unknown                 | Hypothetical protein          | Unknown                       | -                          | -                              | -10.57                    | 5.57                      | 12.22                     | 17.13                  | 0.0113852       | <b>0.000146</b> | 0.0010162         | <b>0.000399</b>   |
| SpM12_ChORF256-17_at   | -           | <i>SpyoM12_Chr ORF_256_17</i>          | Unknown                 | Hypothetical protein          | Unknown                       | Essential                  | Essential                      | -10.57                    | 10.06                     | 8.85                      | 13.66                  | 0.0002663       | <b>9.32E-06</b> | 0.0054175         | 0.001624          |
| SpM5_ChORF125g-225_at  | -           | <i>SpyoM5_Chr ORF_125g01.q1ch_225</i>  | Unknown                 | Hypothetical protein          | Unknown                       | -                          | -                              | -10.60                    | 10.55                     | 2.63                      | 5.17                   | 0.0553087       | 0.00068         | 0.4519107         | 0.092549          |
| SpM1_ChORF1863_s_at    | -           | <i>spy1863</i>                         | RNA metabolism          | Transcription regulation      |                               | -                          | -                              | -10.68                    | -25.33                    | 13.15                     | 4.66                   | 0.0005567       | <b>1.17E-05</b> | 0.1964143         | 0.043412          |
| SpM12_ChORF249-1_at    | -           | <i>SpyoM12_Chr ORF_249_1</i>           | Unknown                 | Hypothetical protein          | Unknown                       | Essential                  | Essential                      | -10.78                    | 1.51                      | -7.18                     | 14.41                  | 0.0585793       | 0.000719        | 0.0005841         | <b>0.000304</b>   |
| SpM1_ChORF0179_s_at    | <i>araD</i> | <i>spy0179</i>                         | Carbohydrate metabolism | Carbohydrate assimilation     | Carbohydrate assimilation     | -                          | -                              | -10.80                    | 1506.38                   | 3304.34                   | 625.13                 | 2.79E-33        | <b>7.91E-06</b> | 1.41E-09          | <b>0.000225</b>   |
| SpM49_ChORF1257-2_at   | -           | <i>SpyoM49_Chr ORF_sp001_0_1257_2</i>  | Unknown                 | Hypothetical protein          | Unknown                       | -                          | -                              | -10.90                    | 8.94                      | 12.07                     | 6.87                   | 0.0031284       | <b>4.16E-05</b> | 0.3171065         | 0.066971          |
| SpM12_ChORF293-41_s_at | -           | <i>SpyoM12_Chr ORF_293_41</i>          | Unknown                 | Hypothetical protein          | Unknown                       | -                          | -                              | -10.96                    | 12.86                     | 14.28                     | -31.70                 | 8.57E-05        | <b>8.18E-06</b> | 2.55E-08          | <b>0.000225</b>   |
| SpM18_ChORF1444_x_at   | -           | <i>spyM18_1444</i>                     | Phage                   | Phage proteins                |                               | -                          | -                              | -11.06                    | -25.59                    | -7.50                     | -3.79                  | 2.83E-10        | <b>7.91E-06</b> | 0.2550748         | 0.054893          |
| SpM18_ChORF1283_x_at   | -           | <i>spyM18_1283</i>                     | Phage                   | Phage proteins                |                               | -                          | -                              | -11.10                    | -0.43                     | -15.55                    | 13.70                  | 0.134096        | 0.001597        | 0.0216889         | 0.005881          |
| SpM12_ChORF289-43_s_at | -           | <i>SpyoM12_Chr ORF_289_43</i>          | Unknown                 | Hypothetical protein          | Unknown                       | -                          | -                              | -11.17                    | 7.04                      | -12.42                    | 7.42                   | 0.0454674       | <b>0.000562</b> | 0.3183322         | 0.06719           |
| SpM18_ChORF1237_x_at   | -           | <i>spyM18_1237</i>                     | Phage                   | Phage proteins                |                               | -                          | -                              | -11.41                    | -8.01                     | -22.45                    | 13.09                  | 0.0173442       | <b>0.000221</b> | 0.0147852         | 0.00412           |
| SpM12_ChORF262-3_s_at  | -           | <i>SpyoM12_Chr ORF_262_3</i>           | Unknown                 | Hypothetical protein          | Unknown                       | Essential                  | Essential                      | -11.49                    | 1.13                      | -10.97                    | 10.08                  | 0.261212        | 0.003047        | 0.1317656         | 0.029972          |
| SpM49_ChORF7585-17_at  | -           | <i>SpyoM49_Chr ORF_sp001_0_7585_17</i> | Unknown                 | Hypothetical protein          | Unknown                       | -                          | -                              | -11.71                    | -6.48                     | -11.90                    | 10.64                  | 0.0579867       | 0.000712        | 0.0002617         | <b>0.000246</b>   |
| SpM12_ChORF262-1_s_at  | -           | <i>SpyoM12_Chr ORF_262_1</i>           | Unknown                 | Hypothetical protein          | Unknown                       | Essential                  | Essential                      | -12.01                    | 2.99                      | -13.39                    | 7.59                   | 0.12672         | 0.001511        | 0.2547559         | 0.054858          |
| SpM12_ChORF288-43_s_at | -           | <i>SpyoM12_Chr ORF_288_43</i>          | Unknown                 | Hypothetical protein          | Unknown                       | -                          | Essential                      | -12.23                    | 3.84                      | -9.87                     | 9.93                   | 0.1012645       | 0.00122         | 0.1056186         | 0.024532          |
| SpM1_ChORF0031_s_at    | -           | <i>spy0031</i>                         | Unknown                 | Hypothetical protein          | Unknown                       | -                          | Essential                      | -12.37                    | -1.95                     | -4.79                     | 1.75                   | 0.0004028       | <b>1.04E-05</b> | 0.5891207         | 0.116705          |
| SpM12_ChORF297-3_s_at  | -           | <i>SpyoM12_Chr ORF_297_3</i>           | Unknown                 | Hypothetical protein          | Unknown                       | -                          | -                              | -12.48                    | 6.21                      | -3.45                     | 11.17                  | 0.1889194       | 0.002225        | 0.0806286         | 0.019197          |
| SpM1_ChORF2041_s_at    | -           | <i>spy2041</i>                         | Unknown                 | Hypothetical protein          | Unknown                       | -                          | -                              | -12.63                    | 1.98                      | -13.44                    | 9.14                   | 0.1442979       | 0.001712        | 0.1556298         | 0.034903          |
| SpM18_ChORF2160_s_at   | <i>mga</i>  | <i>spyM18_2160</i>                     | RNA metabolism          | Transcription regulation      |                               | -                          | -                              | -12.69                    | -29.28                    | 68.57                     | -84.40                 | 1.38E-09        | <b>7.91E-06</b> | 1.42E-13          | <b>0.000225</b>   |



| Probe Set Name*        | Gene Name   | Synonym                              | Category                | Subcategory                     | Function                             | <i>Bacillus subtilis</i> <sup>†</sup> | <i>Staphylococcus aureus</i> <sup>†</sup> | Difference Time (30 - 0) <sup>‡</sup> | Difference Time (60 - 0) <sup>‡</sup> | Difference Time (90 - 0) <sup>‡</sup> | Difference (Mut - WT) <sup>‡</sup> | P-value (Time) <sup>§</sup> | Q-value (Time) <sup>§</sup> | P-value (Strain) <sup>§</sup> | Q-value (Strain) <sup>§</sup> |
|------------------------|-------------|--------------------------------------|-------------------------|---------------------------------|--------------------------------------|---------------------------------------|-------------------------------------------|---------------------------------------|---------------------------------------|---------------------------------------|------------------------------------|-----------------------------|-----------------------------|-------------------------------|-------------------------------|
| SpM1_ChORF1088_at      | -           | <i>spy1088</i>                       | Phage                   | Phage proteins                  | Phage regulatory proteins            | Essential                             | -                                         | -12.71                                | 6.98                                  | 2.23                                  | 17.49                              | 0.0700836                   | 0.000852                    | 0.0027681                     | 0.000877                      |
| SpM1_ChORF1592_s_at    | -           | <i>spy1592</i>                       | Membrane transport      | Membrane transport              | Unknown substrate membrane transport | -                                     | -                                         | -12.77                                | 295.37                                | 1049.07                               | 470.96                             | 4.11E-29                    | <b>7.91E-06</b>             | 1.27E-20                      | <b>0.000225</b>               |
| SpM1_ChORF1365_s_at    | -           | <i>spy1365</i>                       | RNA metabolism          | Transcription regulation        | Signal transduction                  | -                                     | -                                         | -12.83                                | -116.21                               | -186.75                               | 50.23                              | 4.76E-05                    | <b>7.97E-06</b>             | 0.0938666                     | 0.022137                      |
| SpM1_ChORF0142_s_at    | -           | <i>spy0142</i>                       | Carbohydrate metabolism | Carbohydrate central metabolism | Carbohydrate central metabolism      | -                                     | -                                         | -12.85                                | -18.71                                | -20.11                                | 6.25                               | 0.020604                    | <b>0.000261</b>             | 0.1581198                     | 0.035371                      |
| M12_1862_s_at          | -           | <i>M12_1862</i>                      | Mobile Genetic Element  | Mobile Genetic Element          | IS Element-associated ORF            | -                                     | -                                         | -12.91                                | -4.85                                 | -1.92                                 | 3.57                               | 0.3887754                   | 0.004475                    | 0.507916                      | 0.102643                      |
| SpM1_ChORF0706_s_at    | -           | <i>spy0706</i>                       | Phage                   | Phage proteins                  |                                      | -                                     | -                                         | -13.10                                | -5.13                                 | -13.59                                | 8.85                               | 0.0198891                   | <b>0.000252</b>             | 0.0046638                     | 0.001416                      |
| SpM12_ChORF224-2_at    | -           | <i>SpyoM12_ChORF_224_2</i>           | Unknown                 | Hypothetical protein            | Unknown                              | Essential                             | -                                         | -13.13                                | -0.23                                 | -11.85                                | 11.73                              | 0.0772361                   | 0.000935                    | 0.0051124                     | 0.001542                      |
| SpM1_ChORF0804_s_at    | <i>infC</i> | <i>spy0804</i>                       | Protein synthesis       | Translation factors             | Translation factor                   | -                                     | -                                         | -13.18                                | -302.06                               | 145.35                                | -95.77                             | 9.13E-09                    | <b>7.91E-06</b>             | 0.3590992                     | 0.075162                      |
| SpM12_ChORF227-1_at    | -           | <i>SpyoM12_ChORF_227_1</i>           | Unknown                 | Hypothetical protein            | Unknown                              | -                                     | -                                         | -13.22                                | 8.36                                  | -2.14                                 | 2.51                               | 0.0121899                   | <b>0.000156</b>             | 0.8248759                     | 0.155434                      |
| SpM12_ChORF265-2_s_at  | -           | <i>SpyoM12_ChORF_265_2</i>           | Unknown                 | Hypothetical protein            | Unknown                              | -                                     | -                                         | -13.24                                | 9.28                                  | -8.87                                 | 13.89                              | 0.0431876                   | <b>0.000534</b>             | 0.0299578                     | 0.007868                      |
| SpM1_ChORF1985_s_at    | -           | <i>spy1985</i>                       | Unknown                 | Hypothetical protein            | Unknown                              | -                                     | -                                         | -13.31                                | 274.19                                | 500.58                                | -10.43                             | 8.05E-21                    | <b>7.91E-06</b>             | 0.8540511                     | 0.159396                      |
| SpM1_ChORF1250_s_at    | <i>mreA</i> | <i>spy1250</i>                       | Cofactors               |                                 |                                      | -                                     | -                                         | -13.55                                | -98.97                                | -124.04                               | -38.27                             | 4.10E-17                    | <b>7.91E-06</b>             | 1.09E-05                      | <b>0.000225</b>               |
| M12_1863_s_at          | -           | <i>M12_1863</i>                      | Mobile Genetic Element  | Mobile Genetic Element          | IS Element-associated ORF            | -                                     | -                                         | -13.62                                | 1.20                                  | -8.75                                 | 11.98                              | 0.3091694                   | 0.003579                    | 0.0685656                     | 0.016606                      |
| SpM12_ChORF296-1_s_at  | -           | <i>SpyoM12_ChORF_296_1</i>           | Unknown                 | Hypothetical protein            | Unknown                              | Essential                             | -                                         | -13.72                                | 6.98                                  | -8.74                                 | 4.70                               | 0.0801538                   | 0.000969                    | 0.646111                      | 0.126145                      |
| SpM1_ChORF1186_s_at    | <i>citD</i> | <i>spy1186</i>                       | Carbohydrate metabolism | Carbohydrate central metabolism | Carbohydrate central metabolism      | -                                     | -                                         | -13.85                                | 40.51                                 | -19.30                                | -71.44                             | 0.0622602                   | 0.000762                    | 1.68E-06                      | <b>0.000225</b>               |
| SpM1_ChORF1287_s_at    | -           | <i>spy1287</i>                       | Membrane transport      | Membrane transport              | Unknown substrate membrane transport | -                                     | -                                         | -13.87                                | 132.84                                | 210.41                                | 82.60                              | 1.58E-16                    | <b>7.91E-06</b>             | 1.70E-06                      | <b>0.000225</b>               |
| SpM1_ChORF1607_s_at    | -           | <i>spy1607</i>                       | RNA metabolism          | Transcription regulation        |                                      | -                                     | -                                         | -13.97                                | -77.92                                | -136.68                               | 40.38                              | 5.33E-11                    | <b>7.91E-06</b>             | 0.0052906                     | 0.001591                      |
| M12_0652_at            | -           | <i>M12_0652</i>                      | Unknown                 | Hypothetical protein            | Unknown                              | -                                     | -                                         | -14.10                                | -4.28                                 | -8.52                                 | -1.36                              | 0.3436588                   | 0.003964                    | 0.8096924                     | 0.153231                      |
| SpM12_ChORF292-19_s_at | -           | <i>SpyoM12_ChORF_292_19</i>          | Unknown                 | Hypothetical protein            | Unknown                              | -                                     | -                                         | -14.25                                | -3.31                                 | -4.05                                 | 4.97                               | 0.2259537                   | 0.002647                    | 0.5294753                     | 0.106327                      |
| SpM49_ChORF7585-37_at  | -           | <i>SpyoM49_ChORF_sp001_0_7585_37</i> | Unknown                 | Hypothetical protein            | Unknown                              | -                                     | -                                         | -14.29                                | -10.18                                | -14.57                                | 9.68                               | 0.0049721                   | <b>6.53E-05</b>             | 9.50E-05                      | <b>0.000226</b>               |
| SpM18_ChORF1301_at     | -           | <i>spyM18_1301</i>                   | Phage                   | Phage proteins                  |                                      | -                                     | -                                         | -14.39                                | 11.51                                 | 4.51                                  | 8.37                               | 0.0046059                   | <b>6.06E-05</b>             | 0.0972724                     | 0.022875                      |
| SpM12_ChORF284-43_s_at | -           | <i>SpyoM12_ChORF_284_43</i>          | Unknown                 | Hypothetical protein            | Unknown                              | -                                     | -                                         | -14.41                                | -2.82                                 | -15.27                                | 14.67                              | 0.2221342                   | 0.002605                    | 0.0263208                     | 0.006997                      |

| Probe Set Name*         | Gene Name      | Synonym                                 | Category               | Subcategory              | Function                          | <i>Bacillus subtilis</i> <sup>†</sup> | <i>Staphylococcus aureus</i> <sup>†</sup> | Difference Time (30 - 0) <sup>‡</sup> | Difference Time (60 - 0) <sup>‡</sup> | Difference Time (90 - 0) <sup>‡</sup> | Difference (Mut - WT) <sup>‡</sup> | P-value (Time) <sup>§</sup> | Q-value (Time) <sup>§</sup> | P-value (Strain) <sup>§</sup> | Q-value (Strain) <sup>§</sup> |
|-------------------------|----------------|-----------------------------------------|------------------------|--------------------------|-----------------------------------|---------------------------------------|-------------------------------------------|---------------------------------------|---------------------------------------|---------------------------------------|------------------------------------|-----------------------------|-----------------------------|-------------------------------|-------------------------------|
| SpM1_ChORF0531_s_at     | <i>acpA</i>    | <i>spy0531</i>                          | RNA metabolism         | RNA modification         | RNA modification                  | -                                     | -                                         | -14.41                                | -115.75                               | -91.61                                | -20.68                             | 1.26E-30                    | <b>7.91E-06</b>             | 3.57E-05                      | <b>0.000225</b>               |
| SpM1_ChORF0364_s_at     | -              | <i>spy0364</i>                          | Unknown                | Hypothetical protein     | Unknown                           | -                                     | -                                         | -14.71                                | -72.80                                | -217.57                               | 21.35                              | 1.32E-22                    | <b>7.91E-06</b>             | 0.1134285                     | 0.026225                      |
| SpM12_ChORF299-41_at    | -              | <i>SpyoM12_ChORF_299_41</i>             | Unknown                | Hypothetical protein     | Unknown                           | -                                     | -                                         | -14.76                                | -29.20                                | 26.90                                 | -21.80                             | 1.03E-06                    | <b>7.91E-06</b>             | 0.0002922                     | <b>0.000251</b>               |
| SpM12_ChORF280-10_s_at  | -              | <i>SpyoM12_ChORF_280_10</i>             | Unknown                | Hypothetical protein     | Unknown                           | -                                     | -                                         | -14.90                                | 11.35                                 | 0.25                                  | 10.63                              | 0.0009037                   | <b>1.49E-05</b>             | 0.0804757                     | 0.019193                      |
| SpM12_ChORF262-4_s_at   | -              | <i>SpyoM12_ChORF_262_4</i>              | Unknown                | Hypothetical protein     | Unknown                           | Essential                             | Essential                                 | -14.98                                | -2.14                                 | -7.51                                 | 14.00                              | 0.2974446                   | 0.003447                    | 0.0248398                     | 0.006654                      |
| SpM5_ChORF125g-178_at   | -              | <i>SpyoM5_ChORF_125g01.q1ch_178</i>     | Unknown                | Hypothetical protein     | Unknown                           | -                                     | -                                         | -15.01                                | 0.24                                  | -10.64                                | 13.27                              | 0.1988195                   | 0.00234                     | 0.0456933                     | 0.011462                      |
| SpM1_ChORF0300_s_at     | <i>comX1.1</i> | <i>spy0300</i>                          | Membrane transport     | Membrane transport       | Quorum sensing membrane transport | -                                     | -                                         | -15.18                                | 1.23                                  | -1.09                                 | -2.22                              | 4.95E-07                    | <b>7.91E-06</b>             | 0.8378016                     | 0.157196                      |
| SpM49_ChORF7585-11_s_at | -              | <i>spyM18_1495</i>                      | Unknown                | Hypothetical protein     | Unknown                           | -                                     | -                                         | -15.28                                | -17.39                                | -17.03                                | -5.92                              | 4.92E-06                    | <b>7.91E-06</b>             | 0.0007711                     | <b>0.000343</b>               |
| SpM5_ChORF4P31a-181_x   | -              | <i>SpyoM5_ChORF_4P31a0.1.w2c2309_18</i> | Unknown                | Hypothetical protein     | Unknown                           | -                                     | -                                         | -15.31                                | 13.25                                 | 159.69                                | -17.06                             | 1.71E-12                    | <b>7.91E-06</b>             | 0.3840276                     | 0.079857                      |
| SpM1_ChORF0198_s_at     | -              | <i>spy0198</i>                          | Mobile Genetic Element | Mobile Genetic Element   | Transposase                       | -                                     | -                                         | -15.41                                | -9.72                                 | -8.87                                 | 11.75                              | 8.94E-07                    | <b>7.91E-06</b>             | 2.77E-05                      | <b>0.000225</b>               |
| SpM12_ChORF247-14_s_at  | -              | <i>SpyoM12_ChORF_247_14</i>             | Unknown                | Hypothetical protein     | Unknown                           | Essential                             | Essential                                 | -15.57                                | 1.33                                  | -8.71                                 | 13.24                              | 0.2684637                   | 0.003128                    | 0.072053                      | 0.017355                      |
| SpM49_ChORF7585-28_at   | -              | <i>SpyoM49_ChORF_sp001_0_7585_28</i>    | Unknown                | Hypothetical protein     | Unknown                           | -                                     | -                                         | -15.61                                | -9.39                                 | -8.02                                 | 17.64                              | 0.3141793                   | 0.003636                    | 0.0026123                     | 0.000833                      |
| SpM1_ChORF1237_s_at     | <i>ciaR</i>    | <i>spy1237</i>                          | RNA metabolism         | Transcription regulation | Signal transduction               | -                                     | -                                         | -15.61                                | -75.70                                | -96.98                                | 8.80                               | 4.98E-18                    | <b>7.91E-06</b>             | 0.1497958                     | 0.03368                       |
| SpM1_ChORF0631_s_at     | <i>agaV</i>    | <i>spy0631</i>                          | Membrane transport     | Membrane transport       | Carbohydrate membrane transport   | -                                     | -                                         | -15.73                                | 24.06                                 | 46.36                                 | -3.29                              | 1.73E-05                    | <b>7.91E-06</b>             | 0.6564627                     | 0.127882                      |
| SpM1_ChORF0831_s_at     | <i>pyrP</i>    | <i>spy0831</i>                          | Membrane transport     | Membrane transport       | Nucleotide membrane transport     | -                                     | -                                         | -15.79                                | -134.54                               | -487.15                               | 25.03                              | 5.33E-07                    | <b>7.91E-06</b>             | 0.4156083                     | 0.085614                      |
| SpM18_ChORF1923_at      | -              | <i>spyM18_1923</i>                      | Unknown                | Hypothetical protein     | Unknown                           | -                                     | -                                         | -15.86                                | 17.82                                 | 13.73                                 | -7.54                              | 8.99E-06                    | <b>7.91E-06</b>             | 0.2781337                     | 0.059419                      |
| SpM1_ChORF2081_s_at     | <i>hutI</i>    | <i>spy2081</i>                          | Amino acid metabolism  | Amino acid catabolism    | Amino acid catabolism             | -                                     | -                                         | -15.99                                | 75.76                                 | 323.91                                | -2.62                              | 3.17E-15                    | <b>7.91E-06</b>             | 0.8305841                     | 0.156104                      |
| SpM49_ChORF7585-43_at   | -              | <i>SpyoM49_ChORF_sp001_0_7585_43</i>    | Unknown                | Hypothetical protein     | Unknown                           | -                                     | -                                         | -16.14                                | 1.65                                  | -11.85                                | 16.65                              | 0.0537404                   | 0.000661                    | 0.0022153                     | 0.000723                      |
| SpM1_ChORF1444_s_at     | -              | <i>spy1444</i>                          | Phage                  | Phage proteins           | Phage regulatory proteins         | -                                     | -                                         | -16.32                                | -1.65                                 | -7.44                                 | 13.08                              | 0.1798831                   | 0.002122                    | 0.0240893                     | 0.006472                      |
| SpM12_ChORF257-16_s_at  | -              | <i>SpyoM12_ChORF_257_16</i>             | Unknown                | Hypothetical protein     | Unknown                           | Essential                             | Essential                                 | -16.46                                | 2.42                                  | -13.76                                | 12.16                              | 0.0507676                   | 0.000625                    | 0.0468843                     | 0.011735                      |

| Probe Set Name*       | Gene Name     | Synonym                                | Category          | Subcategory                    | Function                   | <i>Bacillus subtilis</i> † | <i>Staphylococcus aureus</i> † | Difference Time (30 - 0)‡ | Difference Time (60 - 0)‡ | Difference Time (90 - 0)‡ | Difference (Mut - WT)‡ | P-value (Time)§ | Q-value (Time)§ | P-value (Strain)§ | Q-value (Strain)§ |
|-----------------------|---------------|----------------------------------------|-------------------|--------------------------------|----------------------------|----------------------------|--------------------------------|---------------------------|---------------------------|---------------------------|------------------------|-----------------|-----------------|-------------------|-------------------|
| SpM1_ChORF1443_s_at   | -             | <i>spy1443</i>                         | Phage             | Phage proteins                 |                            | -                          | -                              | -16.46                    | -8.62                     | -28.42                    | 12.78                  | 0.0173615       | <b>0.000221</b> | 0.0664616         | 0.016141          |
| SpM18_ChORF1302_at    | -             | <i>spyM18_1302</i>                     | Phage             | Phage proteins                 |                            | -                          | -                              | -16.55                    | 170.70                    | 476.26                    | 13.77                  | 1.78E-20        | <b>7.91E-06</b> | 0.2816815         | 0.060067          |
| SpM12_ChORF294-6_s_at | -             | <i>SpyoM12_Chr ORF_294_6</i>           | Unknown           | Hypothetical protein           | Unknown                    | -                          | -                              | -16.70                    | -3.16                     | -3.94                     | 13.78                  | 0.1054198       | 0.001265        | 0.0188579         | 0.005173          |
| SpM5_ChORF169a-232_at | -             | <i>SpyoM5_Chr ORF_169a5.p1t_232</i>    | Unknown           | Hypothetical protein           | Unknown                    | -                          | -                              | -16.80                    | 6.00                      | -11.32                    | 8.21                   | 0.0409933       | <b>0.000508</b> | 0.2586212         | 0.055554          |
| SpM1_ChORF0238_s_at   | -             | <i>spy0238</i>                         | Unknown           | Hypothetical cytosolic protein | Unknown                    | -                          | -                              | -16.97                    | -47.06                    | -60.70                    | 102.67                 | 0.0013466       | <b>1.97E-05</b> | 6.10E-13          | <b>0.000225</b>   |
| SpM1_ChORF1253_s_at   | -             | <i>spy1253</i>                         | Unknown           | Hypothetical protein           | Unknown                    | -                          | -                              | -17.02                    | 24.69                     | 173.32                    | 35.29                  | 7.40E-11        | <b>7.91E-06</b> | 0.01647           | 0.004558          |
| SpM5_ChORF125g-172_at | -             | <i>SpyoM5_Chr ORF_125g01.q1ch_172</i>  | Unknown           | Hypothetical protein           | Unknown                    | -                          | -                              | -17.30                    | 10.19                     | -3.25                     | 10.48                  | 0.0079127       | <b>0.000103</b> | 0.1227988         | 0.028206          |
| SpM49_ChORF7585-39_at | -             | <i>SpyoM49_Chr ORF_sp001_0_7585_39</i> | Unknown           | Hypothetical protein           | Unknown                    | -                          | -                              | -17.35                    | -2.02                     | -13.27                    | 14.45                  | 0.0196922       | <b>0.00025</b>  | 0.0014306         | <b>0.000506</b>   |
| SpM1_ChORF1513_s_at   | <i>ileS</i>   | <i>spy1513</i>                         | Protein synthesis | tRNA synthetases               | tRNA synthetase            | -                          | -                              | -17.37                    | -46.37                    | -32.76                    | -200.43                | 0.104726        | 0.001259        | 1.55E-17          | <b>0.000225</b>   |
| SpM49_ChORF7585-22_at | -             | <i>SpyoM49_Chr ORF_sp001_0_7585_22</i> | Unknown           | Hypothetical protein           | Unknown                    | -                          | -                              | -17.62                    | -9.59                     | -17.05                    | 17.33                  | 0.0002963       | <b>9.53E-06</b> | 4.58E-09          | <b>0.000225</b>   |
| SpyM3_1756_s_at       | -             | <i>SpyM3_1756</i>                      | Unknown           | Hypothetical protein           | Unknown                    | -                          | -                              | -17.68                    | 13.24                     | -18.44                    | 0.00                   | 1.60E-08        | <b>7.91E-06</b> | 0.8733689         | 0.162567          |
| SpM5_ChORF125g-177_at | -             | <i>SpyoM5_Chr ORF_125g01.q1ch_177</i>  | Unknown           | Hypothetical protein           | Unknown                    | -                          | -                              | -17.88                    | 4.14                      | -0.66                     | 5.90                   | 0.0214844       | <b>0.000272</b> | 0.46116           | 0.094114          |
| SpM1_ChORF1468_s_at   | -             | <i>spy1468</i>                         | Phage             | Phage proteins                 |                            | -                          | -                              | -17.88                    | -4.08                     | -8.45                     | 15.11                  | 0.0163735       | <b>0.000209</b> | 0.003058          | 0.000961          |
| SpM1_ChORF1924_s_at   | <i>lacR.2</i> | <i>spy1924</i>                         | RNA metabolism    | Transcription r egulation      |                            | -                          | -                              | -17.88                    | -43.49                    | -90.81                    | 104.56                 | 0.0005439       | <b>1.16E-05</b> | 4.91E-08          | <b>0.000225</b>   |
| SpM49_ChORF7585-26_at | -             | <i>SpyoM49_Chr ORF_sp001_0_7585_26</i> | Unknown           | Hypothetical protein           | Unknown                    | -                          | -                              | -18.06                    | -12.62                    | -13.60                    | 19.15                  | 0.0054969       | <b>7.18E-05</b> | 7.92E-08          | <b>0.000225</b>   |
| SpM1_ChORF0535_s_at   | -             | <i>spy0535</i>                         | Unknown           | Hypothetical Cytosolic Protein | Unknown                    | -                          | -                              | -18.10                    | -14.05                    | 0.98                      | 21.03                  | 5.42E-09        | <b>7.91E-06</b> | 9.75E-09          | <b>0.000225</b>   |
| SpM1_ChORF0052_s_at   | <i>rpIB</i>   | <i>spy0052</i>                         | Protein synthesis | Ribosomal proteins             | Ribosomal protein          | -                          | -                              | -18.15                    | -648.47                   | -731.96                   | -248.18                | 3.79E-11        | <b>7.91E-06</b> | 0.0394863         | 0.010041          |
| SpM1_ChORF1448_s_at   | -             | <i>spy1448</i>                         | Phage             | Phage proteins                 | Phage structural proteins  | -                          | -                              | -18.27                    | -5.81                     | -19.31                    | 19.50                  | 0.1061731       | 0.001274        | 0.0028224         | 0.000892          |
| SpM1_ChORF1450_s_at   | -             | <i>spy1450</i>                         | Phage             | Phage proteins                 | Phage structural proteins  | -                          | -                              | -18.30                    | -6.78                     | -21.65                    | 17.92                  | 0.0466797       | <b>0.000576</b> | 0.0025895         | 0.000828          |
| SpM12_ChORF299-48_at  | -             | <i>SpyoM12_Chr ORF_299_48</i>          | Unknown           | Hypothetical protein           | Unknown                    | -                          | -                              | -18.32                    | -11.53                    | 2.59                      | 25.00                  | 1.08E-09        | <b>7.91E-06</b> | 2.88E-09          | <b>0.000225</b>   |
| SpM1_ChORF1964_s_at   | <i>cdsA</i>   | <i>spy1964</i>                         | Cell envelope     | Membrane lipids                | Phospholipids biosynthesis | -                          | -                              | -18.35                    | -60.78                    | -51.26                    | -33.05                 | 0.0013106       | <b>1.93E-05</b> | 0.0023025         | 0.000748          |

| Probe Set Name*        | Gene Name   | Synonym                              | Category           | Subcategory                            | Function                               | <i>Bacillus subtilis</i> <sup>†</sup> | <i>Staphylococcus aureus</i> <sup>†</sup> | Difference Time (30 - 0) <sup>‡</sup> | Difference Time (60 - 0) <sup>‡</sup> | Difference Time (90 - 0) <sup>‡</sup> | Difference (Mut - WT) <sup>‡</sup> | P-value (Time) <sup>§</sup> | Q-value (Time) <sup>§</sup> | P-value (Strain) <sup>§</sup> | Q-value (Strain) <sup>§</sup> |
|------------------------|-------------|--------------------------------------|--------------------|----------------------------------------|----------------------------------------|---------------------------------------|-------------------------------------------|---------------------------------------|---------------------------------------|---------------------------------------|------------------------------------|-----------------------------|-----------------------------|-------------------------------|-------------------------------|
| SpM1_ChORF1424_s_at    | -           | <i>spy1424</i>                       | Membrane transport | Membrane transport                     | Unknown substrate membrane transport   | -                                     | -                                         | -18.38                                | 28.09                                 | 62.09                                 | 111.15                             | 0.0005374                   | <b>1.15E-05</b>             | 1.08E-10                      | <b>0.000225</b>               |
| SpyM3_1303_at          | -           | <i>SpyM3_1303</i>                    | Phage              | Phage proteins                         |                                        | -                                     | -                                         | -18.87                                | -2.08                                 | -14.52                                | 13.53                              | 0.0592624                   | 0.000726                    | 0.0231064                     | 0.006242                      |
| SpM1_ChORF1438_s_at    | -           | <i>spy1438</i>                       | Phage              | Phage proteins                         |                                        | -                                     | -                                         | -18.93                                | -6.04                                 | -17.79                                | 16.50                              | 0.1019005                   | 0.001227                    | 0.0099302                     | 0.002846                      |
| SpM1_ChORF0008_s_at    | <i>trcF</i> | <i>spy0008</i>                       | RNA metabolism     | Basic transcription machinery          | Basic transcription machinery          | -                                     | -                                         | -19.11                                | -75.69                                | -129.14                               | -83.80                             | 7.01E-18                    | <b>7.91E-06</b>             | 1.26E-15                      | <b>0.000225</b>               |
| SpM1_ChORF2117_s_at    | <i>cinA</i> | <i>spy2117</i>                       | Unknown            | Hypothetical protein                   | Unknown                                | -                                     | -                                         | -19.11                                | 109.15                                | 43.81                                 | 117.88                             | 0.0001927                   | <b>8.82E-06</b>             | 4.68E-08                      | <b>0.000225</b>               |
| SpM12_ChORF286-31_s_at | -           | <i>SpyoM12_ChORF_286_31</i>          | Unknown            | Hypothetical protein                   | Unknown                                | -                                     | -                                         | -19.23                                | -4.81                                 | -16.20                                | 12.80                              | 0.0625489                   | 0.000764                    | 0.0251761                     | 0.006738                      |
| SpM49_ChORF7585-24_at  | -           | <i>SpyoM49_ChORF_sp001_0_7585_24</i> | Unknown            | Hypothetical protein                   | Unknown                                | -                                     | -                                         | -19.34                                | -11.88                                | -17.39                                | 14.99                              | 0.0014001                   | <b>2.03E-05</b>             | 5.62E-06                      | <b>0.000225</b>               |
| SpM49_ChORF7585-21_at  | -           | <i>SpyoM49_ChORF_sp001_0_7585_21</i> | Unknown            | Hypothetical protein                   | Unknown                                | -                                     | -                                         | -19.53                                | -13.04                                | -18.57                                | 19.74                              | 0.0002716                   | <b>9.35E-06</b>             | 2.57E-10                      | <b>0.000225</b>               |
| SpM1_ChORF1473_s_at    | -           | <i>spy1473</i>                       | Phage              | Phage proteins                         |                                        | -                                     | -                                         | -19.61                                | -23.73                                | -21.68                                | -7.31                              | 4.08E-07                    | <b>7.91E-06</b>             | 0.0004479                     | <b>0.00028</b>                |
| SpM1_ChORF1457_s_at    | -           | <i>spy1457</i>                       | Phage              | Phage proteins                         | Phage structural proteins              | -                                     | -                                         | -19.72                                | -7.80                                 | -15.52                                | 17.03                              | 0.110747                    | 0.001325                    | 0.0049965                     | 0.001514                      |
| SpM1_ChORF1455_s_at    | -           | <i>spy1455</i>                       | Phage              | Phage proteins                         |                                        | -                                     | -                                         | -19.73                                | -12.48                                | -20.19                                | 9.31                               | 0.0111843                   | <b>0.000144</b>             | 0.0169424                     | 0.004677                      |
| SpM1_ChORF0148_s_at    | <i>ntpl</i> | <i>spy0148</i>                       | Membrane transport | Membrane transport                     | Ion membrane transport                 | -                                     | -                                         | -19.83                                | 27.80                                 | 23.09                                 | 15.73                              | 0.0006398                   | <b>1.24E-05</b>             | 0.1297882                     | 0.029618                      |
| SpM1_ChORF1118_s_at    | <i>radC</i> | <i>spy1118</i>                       | DNA metabolism     | DNA replication, modification & repair | DNA replication, modification & repair | -                                     | -                                         | -19.91                                | -12.26                                | -17.58                                | -4.84                              | 0.0803174                   | 0.000971                    | 0.2570705                     | 0.055255                      |
| SpM1_ChORF0628_s_at    | -           | <i>spyM18_0693</i>                   | Unknown            | Hypothetical protein                   | Unknown                                | -                                     | -                                         | -19.92                                | -13.74                                | -25.89                                | -0.09                              | 0.0053924                   | <b>7.05E-05</b>             | 0.9363342                     | 0.17246                       |
| SpM12_ChORF267-18_at   | -           | <i>SpyoM12_ChORF_267_18</i>          | Unknown            | Hypothetical protein                   | Unknown                                | -                                     | -                                         | -20.07                                | -12.08                                | -14.40                                | 11.51                              | 0.1477859                   | 0.001751                    | 0.0502236                     | 0.012518                      |
| SpM3_ChORF0757_s_at    | -           | <i>SpyM3_0757</i>                    | Unknown            | Hypothetical protein                   | Unknown                                | -                                     | -                                         | -20.12                                | -8.94                                 | -23.03                                | 15.94                              | 0.0177831                   | <b>0.000226</b>             | 0.0041105                     | 0.001261                      |
| SpM49_ChORF6658-4_s_at | -           | <i>SpyoM49_ChORF_sp001_0_6658_4</i>  | Unknown            | Hypothetical protein                   | Unknown                                | -                                     | -                                         | -20.26                                | 9.43                                  | 1.40                                  | 16.12                              | 0.0021571                   | <b>2.94E-05</b>             | 0.0085058                     | 0.002481                      |
| SpM18_ChORF1136_s_at   | -           | <i>spyM18_1136</i>                   | Unknown            | Hypothetical protein                   | Unknown                                | -                                     | -                                         | -20.41                                | -39.27                                | -46.91                                | -41.08                             | 4.53E-08                    | <b>7.91E-06</b>             | 1.69E-08                      | <b>0.000225</b>               |
| SpM49_ChORF7585-20_at  | -           | <i>SpyoM49_ChORF_sp001_0_7585_20</i> | Unknown            | Hypothetical protein                   | Unknown                                | -                                     | -                                         | -20.46                                | -8.44                                 | -13.82                                | 25.58                              | 0.1087136                   | 0.001303                    | 3.54E-05                      | <b>0.000225</b>               |
| SpM1_ChORF0377_s_at    | -           | <i>spy0377</i>                       | Unknown            | Hypothetical protein                   | Unknown                                | -                                     | -                                         | -20.53                                | 65.65                                 | 94.58                                 | 84.60                              | 0.0002229                   | <b>9.02E-06</b>             | 0.0001292                     | <b>0.000229</b>               |
| SpM1_ChORF1183_s_at    | -           | <i>spy1183</i>                       | Unknown            | Hypothetical protein                   | Unknown                                | -                                     | -                                         | -20.67                                | -25.88                                | -71.93                                | -63.39                             | 8.20E-06                    | <b>7.91E-06</b>             | 2.21E-08                      | <b>0.000225</b>               |
| SpM18_ChORF1397_at     | -           | <i>spyM18_1397</i>                   | Unknown            | Hypothetical protein                   | Unknown                                | -                                     | -                                         | -20.74                                | 8.74                                  | 31.83                                 | 30.12                              | 0.0501417                   | 0.000618                    | 0.0087455                     | 0.002538                      |

| Probe Set Name*       | Gene Name    | Synonym                                | Category               | Subcategory            | Function                             | <i>Bacillus subtilis</i> † | <i>Staphylococcus aureus</i> † | Difference Time (30 - 0)‡ | Difference Time (60 - 0)‡ | Difference Time (90 - 0)‡ | Difference (Mut - WT)‡ | P-value (Time)§ | Q-value (Time)§ | P-value (Strain)§ | Q-value (Strain)§ |
|-----------------------|--------------|----------------------------------------|------------------------|------------------------|--------------------------------------|----------------------------|--------------------------------|---------------------------|---------------------------|---------------------------|------------------------|-----------------|-----------------|-------------------|-------------------|
| SpM12_ChORF299-50_at  | -            | <i>SpyoM12_Chr ORF_299_50</i>          | Unknown                | Hypothetical protein   | Unknown                              | Essential                  | Essential                      | -20.75                    | -7.82                     | -0.55                     | 25.19                  | 4.67E-05        | <b>7.97E-06</b> | 2.16E-07          | <b>0.000225</b>   |
| SpM1_ChORF1459_s_at   | -            | <i>spy1459</i>                         | Phage                  | Phage proteins         | Phage structural proteins            | -                          | -                              | -20.84                    | 0.20                      | -3.87                     | 14.28                  | 0.0197497       | <b>0.00025</b>  | 0.0234757         | 0.006327          |
| SpM12_ChORF220-1_s_at | -            | <i>SpyoM12_Chr ORF_220_1</i>           | Unknown                | Hypothetical protein   | Unknown                              | -                          | -                              | -20.89                    | -1.68                     | -4.01                     | 8.36                   | 0.0023163       | <b>3.14E-05</b> | 0.1574952         | 0.035254          |
| SpM1_ChORF1451_s_at   | -            | <i>spy1451</i>                         | Phage                  | Phage proteins         | Phage structural proteins            | -                          | -                              | -21.00                    | -9.49                     | -23.48                    | 12.04                  | 0.0078018       | <b>0.000101</b> | 0.0120843         | 0.003403          |
| SpM1_ChORF0252_s_at   | -            | <i>spy0252</i>                         | Membrane transport     | Membrane transport     | Carbohydrate membrane transport      | -                          | -                              | -21.07                    | 758.06                    | 1187.93                   | 647.44                 | 8.19E-21        | <b>7.91E-06</b> | 5.80E-15          | <b>0.000225</b>   |
| M12_1348_s_at         | -            | <i>M12_1348</i>                        | Unknown                | Hypothetical protein   | Unknown                              | -                          | -                              | -21.30                    | -8.30                     | -21.13                    | 10.54                  | 0.0007638       | <b>1.36E-05</b> | 0.0058811         | 0.001754          |
| SpM1_ChORF1454_s_at   | -            | <i>spy1454</i>                         | Phage                  | Phage proteins         |                                      | -                          | -                              | -21.32                    | -3.28                     | -14.32                    | 15.66                  | 0.0479694       | <b>0.000592</b> | 0.0072314         | 0.002128          |
| SpM1_ChORF0473_s_at   | <i>dgk</i>   | <i>spy0473</i>                         | Cell envelope          | Membrane lipids        | Phospholipids biosynthesis           | -                          | -                              | -21.36                    | -55.55                    | -121.30                   | 11.08                  | 2.17E-08        | <b>7.91E-06</b> | 0.3978124         | 0.082334          |
| SpM1_ChORF1447_at     | -            | <i>spy1447</i>                         | Phage                  | Phage proteins         |                                      | -                          | -                              | -21.71                    | -1.57                     | -14.19                    | 13.99                  | 0.0305012       | <b>0.000382</b> | 0.0220026         | 0.005954          |
| SpM1_ChORF0904_s_at   | -            | <i>spy0904</i>                         | Membrane transport     | Membrane transport     | Unknown substrate membrane transport | -                          | Essential                      | -21.92                    | -44.95                    | -192.08                   | -31.10                 | 1.94E-10        | <b>7.91E-06</b> | 0.2994249         | 0.063455          |
| SpM49_ChORF7585-23_at | -            | <i>SpyoM49_Chr ORF_sp001_0_7585_23</i> | Unknown                | Hypothetical protein   | Unknown                              | -                          | -                              | -21.95                    | -12.14                    | -17.25                    | 21.96                  | 0.0629388       | 0.000769        | 0.0001257         | <b>0.000229</b>   |
| SpM1_ChORF1149_s_at   | -            | <i>spy1149</i>                         | Membrane transport     | Membrane transport     | Unknown substrate membrane transport | -                          | -                              | -21.95                    | 57.50                     | 292.30                    | -48.73                 | 6.87E-08        | <b>7.91E-06</b> | 0.3680786         | 0.076768          |
| SpM1_ChORF0791_s_at   | <i>rgpEc</i> | <i>spy0791</i>                         | Cell envelope          | Cell wall              | Peptidoglycan biosynthesis           | -                          | -                              | -22.01                    | -98.65                    | -195.47                   | -30.71                 | 5.53E-19        | <b>7.91E-06</b> | 0.0132935         | 0.003725          |
| SpM49_ChORF7585-29_at | -            | <i>SpyoM49_Chr ORF_sp001_0_7585_29</i> | Unknown                | Hypothetical protein   | Unknown                              | -                          | -                              | -22.03                    | -10.06                    | -20.61                    | 18.98                  | 0.0256869       | <b>0.000323</b> | 0.0006453         | <b>0.000316</b>   |
| SpM3_ChORF0391_at     | -            | <i>SpyM3_0391</i>                      | Unknown                | Hypothetical protein   | Unknown                              | -                          | -                              | -22.12                    | -5.65                     | -16.52                    | 18.54                  | 0.0049841       | <b>6.54E-05</b> | 0.0001235         | <b>0.000229</b>   |
| SpM49_ChORF7585-42_at | -            | <i>SpyoM49_Chr ORF_sp001_0_7585_42</i> | Unknown                | Hypothetical protein   | Unknown                              | -                          | -                              | -22.14                    | -4.38                     | -14.00                    | 17.37                  | 0.0339618       | <b>0.000424</b> | 0.0044865         | 0.001364          |
| SpM1_ChORF0565_s_at   | <i>tnpA</i>  | <i>spy0565</i>                         | Mobile Genetic Element | Mobile Genetic Element | Transposase                          | -                          | -                              | -22.16                    | 6.72                      | -6.22                     | 14.89                  | 0.0042265       | <b>5.59E-05</b> | 0.0143545         | 0.004013          |
| SpM1_ChORF0559_s_at   | -            | <i>spy0559</i>                         | Unknown                | Hypothetical protein   | Unknown                              | -                          | -                              | -22.19                    | 20.68                     | 105.67                    | -99.43                 | 4.80E-06        | <b>7.91E-06</b> | 2.89E-09          | <b>0.000225</b>   |
| SpM1_ChORF1111_s_at   | -            | <i>spy1111</i>                         | Unknown                | Hypothetical protein   | Unknown                              | -                          | -                              | -22.29                    | 74.30                     | 191.01                    | 26.25                  | 1.35E-16        | <b>7.91E-06</b> | 0.0647663         | 0.015806          |
| SpM1_ChORF0251_s_at   | -            | <i>spy0251</i>                         | Unknown                | Hypothetical protein   | Unknown                              | -                          | -                              | -22.51                    | 639.88                    | 708.90                    | 592.12                 | 1.85E-14        | <b>7.91E-06</b> | 1.92E-14          | <b>0.000225</b>   |
| SpM1_ChORF0477_s_at   | -            | <i>spy0477</i>                         | Unknown                | Hypothetical protein   | Unknown                              | -                          | -                              | -22.67                    | -87.73                    | -119.57                   | -37.83                 | 1.30E-07        | <b>7.91E-06</b> | 0.0082105         | 0.0024            |
| SpM1_ChORF1491_s_at   | -            | <i>spy1491</i>                         | Unknown                | Hypothetical protein   | Unknown                              | -                          | -                              | -22.90                    | 27.77                     | -32.28                    | -130.79                | 0.0140479       | <b>0.00018</b>  | 8.83E-13          | <b>0.000225</b>   |

| Probe Set Name*       | Gene Name   | Synonym                                  | Category                | Subcategory                    | Function                             | <i>Bacillus subtilis</i> † | <i>Staphylococcus aureus</i> † | Difference Time (30 - 0)‡ | Difference Time (60 - 0)‡ | Difference Time (90 - 0)‡ | Difference (Mut - WT)‡ | P-value (Time)§ | Q-value (Time)§ | P-value (Strain)§ | Q-value (Strain)§ |
|-----------------------|-------------|------------------------------------------|-------------------------|--------------------------------|--------------------------------------|----------------------------|--------------------------------|---------------------------|---------------------------|---------------------------|------------------------|-----------------|-----------------|-------------------|-------------------|
| SpM49_ChORF7585-27_at | -           | <i>SpyoM49_Chr ORF_sp001_0_7585_27</i>   | Unknown                 | Hypothetical protein           | Unknown                              | -                          | -                              | -23.08                    | -12.08                    | -19.06                    | 21.24                  | 0.0330208       | <b>0.000412</b> | 0.0001282         | <b>0.000229</b>   |
| SpyM3_1321_at         | -           | <i>SpyM3_1321</i>                        | Phage                   | Phage proteins                 |                                      | -                          | -                              | -23.08                    | -17.43                    | -19.32                    | 22.23                  | 0.0158424       | <b>0.000202</b> | 4.64E-06          | <b>0.000225</b>   |
| SpM49_ChORF7585-18_at | -           | <i>SpyoM49_Chr ORF_sp001_0_7585_18</i>   | Unknown                 | Hypothetical protein           | Unknown                              | -                          | -                              | -23.27                    | -12.83                    | -17.79                    | 28.83                  | 0.0822526       | 0.000993        | 1.44E-05          | <b>0.000225</b>   |
| SpM1_ChORF0873_s_at   | -           | <i>spy0873</i>                           | Stress adaptation       | Phosphorus metabolism          | PpGpp metabolism                     | -                          | -                              | -23.33                    | 106.77                    | -15.93                    | 197.03                 | 0.0013499       | <b>1.97E-05</b> | 1.87E-14          | <b>0.000225</b>   |
| SpM1_ChORF1440_x_at   | -           | <i>spy1440</i>                           | Phage                   | Phage proteins                 |                                      | -                          | -                              | -23.35                    | -4.37                     | -12.86                    | 16.04                  | 0.0345093       | <b>0.00043</b>  | 0.0080456         | 0.002356          |
| SpM1_ChORF1634_s_at   | -           | <i>spy1634</i>                           | RNA metabolism          | Transcription regulation       |                                      | -                          | -                              | -23.47                    | -16.10                    | 11.43                     | 16.35                  | 0.0016945       | <b>2.37E-05</b> | 0.0090015         | 0.002604          |
| SpM5_ChORFJ7578C-142_ | -           | <i>SpyoM5_Chr ORF_J7578C e05.s1c_142</i> | Unknown                 | Hypothetical protein           | Unknown                              | -                          | -                              | -23.48                    | -6.71                     | -11.50                    | 18.93                  | 0.0371142       | <b>0.000462</b> | 0.0028765         | 0.000908          |
| SpM49_ChORF7585-34_s_ | -           | <i>SpyoM49_Chr ORF_sp001_0_7585_34</i>   | Unknown                 | Hypothetical protein           | Unknown                              | -                          | -                              | -23.52                    | -7.60                     | -13.75                    | 14.63                  | 0.069307        | 0.000845        | 0.0213821         | 0.005803          |
| SpM1_ChORF1558_s_at   | -           | <i>spy1558</i>                           | RNA metabolism          | Transcription regulation       |                                      | -                          | -                              | -23.52                    | -28.28                    | -29.47                    | 8.00                   | 4.53E-12        | <b>7.91E-06</b> | 8.48E-16          | <b>0.000225</b>   |
| SpM49_ChORF7585-35_at | -           | <i>SpyoM49_Chr ORF_sp001_0_7585_35</i>   | Unknown                 | Hypothetical protein           | Unknown                              | -                          | -                              | -23.77                    | -9.39                     | -12.91                    | 16.63                  | 0.0316015       | <b>0.000395</b> | 0.0035987         | 0.001111          |
| SpM5_ChORFJ7578C-260_ | -           | <i>SpyoM5_Chr ORF_J7578C e05.s1c_260</i> | Unknown                 | Hypothetical protein           | Unknown                              | -                          | -                              | -24.15                    | 14.21                     | 12.86                     | -0.59                  | 0.0045928       | <b>6.05E-05</b> | 0.9173656         | 0.169055          |
| SpM49_ChORF7585-25_at | -           | <i>SpyoM49_Chr ORF_sp001_0_7585_25</i>   | Unknown                 | Hypothetical protein           | Unknown                              | -                          | -                              | -24.17                    | -12.61                    | -16.57                    | 20.09                  | 0.0287276       | <b>0.00036</b>  | 0.0002761         | <b>0.000248</b>   |
| SpM18_ChORF0677_x_at  | -           | <i>spyM18_0677</i>                       | Unknown                 | Hypothetical protein           | Unknown                              | -                          | -                              | -24.48                    | -2.95                     | -7.27                     | 13.08                  | 0.0045378       | <b>5.98E-05</b> | 0.0345877         | 0.008931          |
| SpM1_ChORF1821_s_at   | <i>efp</i>  | <i>spy1821</i>                           | Protein synthesis       | Translation factors            | Translation factor                   | -                          | -                              | -24.57                    | 788.37                    | 534.80                    | 80.80                  | 1.01E-13        | <b>7.91E-06</b> | 0.0750641         | 0.01797           |
| SpM1_ChORF2047_s_at   | <i>gldA</i> | <i>spy2047</i>                           | Carbohydrate metabolism | Carbohydrate assimilation      | Carbohydrate assimilation            | -                          | -                              | -24.68                    | 2123.88                   | 3714.62                   | 775.30                 | 7.34E-34        | <b>7.91E-06</b> | 2.11E-10          | <b>0.000225</b>   |
| SpM1_ChORF0877_s_at   | <i>mvaD</i> | <i>spy0877</i>                           | Lipid metabolism        | Isoprenoids                    | Isoprenoid biosynthesis              | -                          | -                              | -25.02                    | -58.91                    | -20.02                    | -60.48                 | 0.000704        | <b>1.30E-05</b> | 9.75E-09          | <b>0.000225</b>   |
| SpM49_ChORF7585-38_at | -           | <i>SpyoM49_Chr ORF_sp001_0_7585_38</i>   | Unknown                 | Hypothetical protein           | Unknown                              | -                          | -                              | -25.19                    | -11.39                    | -16.21                    | 18.61                  | 0.0067048       | <b>8.72E-05</b> | 0.0002762         | <b>0.000248</b>   |
| SpM1_ChORF1963_s_at   | -           | <i>spy1963</i>                           | Protein synthesis       | Protein folding & modification | Protein modification                 | -                          | -                              | -25.29                    | -53.60                    | -58.26                    | -86.00                 | 0.0106976       | <b>0.000138</b> | 3.83E-09          | <b>0.000225</b>   |
| SpM49_ChORF7585-33_at | -           | <i>SpyoM49_Chr ORF_sp001_0_7585_33</i>   | Unknown                 | Hypothetical protein           | Unknown                              | -                          | -                              | -25.36                    | -10.79                    | -14.37                    | 18.54                  | 0.0081418       | <b>0.000105</b> | 0.0004498         | <b>0.00028</b>    |
| SpM1_ChORF0797_s_at   | <i>amrA</i> | <i>spy0797</i>                           | Membrane transport      | Membrane transport             | Unknown substrate membrane transport | -                          | -                              | -25.51                    | 16.55                     | -57.71                    | -10.69                 | 0.158576        | 0.001878        | 0.679303          | 0.13182           |
| SpM5_ChORFJ7578C-298_ | -           | <i>SpyoM5_Chr ORF_J7578C e05.s1c_298</i> | Unknown                 | Hypothetical protein           | Unknown                              | -                          | -                              | -25.95                    | -2.60                     | -5.49                     | 19.88                  | 0.0009795       | <b>1.57E-05</b> | 0.0006786         | <b>0.000323</b>   |
| SpM1_ChORF0272_s_at   | <i>rpsG</i> | <i>spy0272</i>                           | Protein synthesis       | Ribosomal proteins             | Ribosomal protein                    | -                          | -                              | -26.50                    | -735.13                   | -431.17                   | 28.54                  | 1.29E-06        | <b>7.91E-06</b> | 0.3828069         | 0.07965           |

| Probe Set Name*        | Gene Name    | Synonym                               | Category                | Subcategory                    | Function                           | <i>Bacillus subtilis</i> † | <i>Staphylococcus aureus</i> † | Difference Time (30 - 0)‡ | Difference Time (60 - 0)‡ | Difference Time (90 - 0)‡ | Difference (Mut - WT)‡ | P-value (Time)§ | Q-value (Time)§ | P-value (Strain)§ | Q-value (Strain)§ |
|------------------------|--------------|---------------------------------------|-------------------------|--------------------------------|------------------------------------|----------------------------|--------------------------------|---------------------------|---------------------------|---------------------------|------------------------|-----------------|-----------------|-------------------|-------------------|
| SpM1_ChORF0334_s_at    | -            | <i>spy0334</i>                        | Unknown                 | Hypothetical Cytosolic Protein | Unknown                            | -                          | -                              | -26.50                    | -274.29                   | -119.72                   | 421.41                 | 6.90E-08        | <b>7.91E-06</b> | 2.86E-21          | <b>0.000225</b>   |
| M12_0466_at            | -            | <i>M12_0466</i>                       | Mobile Genetic Element  | Mobile Genetic Element         | IS Element-associated ORF          | -                          | -                              | -26.97                    | -3.13                     | -4.95                     | 19.22                  | 0.0112726       | <b>0.000145</b> | 0.0064928         | 0.001926          |
| SpM1_ChORF0792_s_at    | <i>rgpFc</i> | <i>spy0792</i>                        | Cell envelope           | Cell wall                      | Peptidoglycan biosynthesis         | -                          | -                              | -26.97                    | -79.59                    | -183.35                   | -1.83                  | 1.50E-12        | <b>7.91E-06</b> | 0.8904802         | 0.165053          |
| SpM1_ChORF1449_s_at    | -            | <i>spy1449</i>                        | Phage                   | Phage proteins                 | Phage structural proteins          | -                          | -                              | -27.24                    | -5.97                     | -3.07                     | 21.72                  | 0.0004565       | <b>1.08E-05</b> | 0.0005448         | <b>0.000297</b>   |
| SpM1_ChORF0103_s_at    | <i>comYC</i> | <i>spy0103</i>                        | Membrane transport      | Membrane transport             | Quorum sensing membrane transport  | -                          | -                              | -27.46                    | -26.46                    | -9.00                     | 7.12                   | 1.10E-11        | <b>7.91E-06</b> | 0.0407605         | 0.01032           |
| SpM1_ChORF1567_s_at    | -            | <i>spy1567</i>                        | Stress adaptation       | Cold shock proteins            | Cold shock proteins                | -                          | -                              | -27.79                    | 56.66                     | 64.66                     | 121.03                 | 5.38E-06        | <b>7.91E-06</b> | 1.11E-12          | <b>0.000225</b>   |
| SpM5_ChORF275f-245_at  | -            | <i>SpyoM5_Chr ORF_275f02.p1cq_245</i> | Unknown                 | Hypothetical protein           | Unknown                            | -                          | -                              | -27.90                    | -1.78                     | -11.32                    | 15.96                  | 0.0169322       | <b>0.000216</b> | 0.0392703         | 0.010001          |
| SpM18_ChORF0262_at     | -            | <i>spyM18_0262</i>                    | Unknown                 | Hypothetical protein           | Unknown                            | -                          | -                              | -28.10                    | 11.88                     | 4.66                      | 20.21                  | 5.54E-10        | <b>7.91E-06</b> | 0.0011002         | <b>0.00042</b>    |
| SpM1_ChORF0365_s_at    | -            | <i>spy0365</i>                        | Phage                   | Phage proteins                 |                                    | -                          | -                              | -28.60                    | -73.07                    | -198.07                   | 29.22                  | 1.14E-20        | <b>7.91E-06</b> | 0.0387337         | 0.009895          |
| SpM18_ChORF2161_s_at   | -            | <i>spy2103</i>                        | Unknown                 | Hypothetical protein           | Unknown                            | -                          | -                              | -28.80                    | -8.79                     | -4.34                     | 14.47                  | 0.0001783       | <b>8.71E-06</b> | 0.0088956         | 0.002577          |
| SpM1_ChORF1795_s_at    | -            | <i>spy1795</i>                        | Membrane transport      | Membrane transport             | Metal ion membrane transport       | -                          | -                              | -28.96                    | -60.32                    | -93.92                    | -105.81                | 1.35E-12        | <b>7.91E-06</b> | 2.91E-21          | <b>0.000225</b>   |
| SpM1_ChORF0478_s_at    | -            | <i>spy0478</i>                        | Unknown                 | Hypothetical Cytosolic Protein | Unknown                            | -                          | -                              | -29.04                    | 2.04                      | -7.53                     | 16.33                  | 0.0016488       | <b>2.32E-05</b> | 0.0187355         | 0.005144          |
| SpM5_ChORF270b-69_s_at | -            | <i>SpyoM5_Chr ORF_270b10.p1t_69</i>   | Unknown                 | Hypothetical protein           | Unknown                            | -                          | -                              | -29.04                    | -25.68                    | -22.49                    | 32.68                  | 0.0201433       | <b>0.000255</b> | 4.06E-06          | <b>0.000225</b>   |
| SpM1_ChORF1351_s_at    | <i>aroK</i>  | <i>spy1351</i>                        | Amino acid metabolism   | Amino acid biosynthesis        | Amino acid biosynthesis            | Essential                  | Essential                      | -29.24                    | 62.92                     | 106.06                    | 337.49                 | 3.67E-11        | <b>7.91E-06</b> | 1.13E-37          | <b>0.000225</b>   |
| SpM1_ChORF0219_x_at    | -            | <i>spy0219</i>                        | Unknown                 | Hypothetical protein           | Unknown                            | -                          | -                              | -29.27                    | -54.48                    | -25.02                    | -22.51                 | 6.14E-05        | <b>8.03E-06</b> | 0.0082211         | 0.002402          |
| SpM18_ChORF0394_x_at   | -            | <i>spyM18_0394</i>                    | Phage                   | Phage proteins                 |                                    | -                          | -                              | -29.60                    | -18.44                    | -17.43                    | -2.11                  | 1.14E-08        | <b>7.91E-06</b> | 0.8083741         | 0.153063          |
| SpM1_ChORF0045_s_at    | -            | <i>spy0045</i>                        | Membrane transport      | Membrane transport             | Drug, cytolysin membrane transport | -                          | -                              | -29.65                    | -14.49                    | 83.09                     | -31.45                 | 3.02E-06        | <b>7.91E-06</b> | 0.0516477         | 0.012836          |
| SpM1_ChORF0178_s_at    | -            | <i>spy0178</i>                        | Carbohydrate metabolism | Carbohydrate assimilation      | Carbohydrate assimilation          | -                          | -                              | -29.98                    | 1838.93                   | 3150.57                   | 573.92                 | 3.45E-34        | <b>7.91E-06</b> | 1.21E-08          | <b>0.000225</b>   |
| SpM18_ChORF1162_s_at   | <i>rnhB</i>  | <i>spyM18_1162</i>                    | Unknown                 | Hypothetical protein           | Unknown                            | Essential                  | -                              | -30.10                    | -6.92                     | -14.00                    | 15.01                  | 0.0044437       | <b>5.86E-05</b> | 0.018619          | 0.005116          |
| SpM1_ChORF2083_s_at    | -            | <i>spy2083</i>                        | Unknown                 | Hypothetical protein           | Unknown                            | -                          | -                              | -30.30                    | 60.87                     | 262.24                    | 52.47                  | 2.26E-16        | <b>7.91E-06</b> | 0.0020701         | 0.000683          |
| SpM1_ChORF0362_s_at    | -            | <i>spy0362</i>                        | Unknown                 | Hypothetical protein           | Unknown                            | Essential                  | Essential                      | -30.73                    | -104.27                   | -357.64                   | 128.80                 | 2.01E-15        | <b>7.91E-06</b> | 6.35E-06          | <b>0.000225</b>   |
| SpM3_ChORF0388_s_at    | -            | <i>spy0545</i>                        | Unknown                 | Hypothetical protein           | Unknown                            | -                          | -                              | -32.06                    | -10.12                    | -19.47                    | 28.30                  | 0.003599        | <b>4.77E-05</b> | 5.22E-05          | <b>0.000225</b>   |

| Probe Set Name*         | Gene Name     | Synonym                              | Category                | Subcategory                     | Function                             | <i>Bacillus subtilis</i> <sup>†</sup> | <i>Staphylococcus aureus</i> <sup>†</sup> | Difference Time (30 - 0) <sup>‡</sup> | Difference Time (60 - 0) <sup>‡</sup> | Difference Time (90 - 0) <sup>‡</sup> | Difference (Mut - WT) <sup>‡</sup> | P-value (Time) <sup>§</sup> | Q-value (Time) <sup>§</sup> | P-value (Strain) <sup>§</sup> | Q-value (Strain) <sup>§</sup> |
|-------------------------|---------------|--------------------------------------|-------------------------|---------------------------------|--------------------------------------|---------------------------------------|-------------------------------------------|---------------------------------------|---------------------------------------|---------------------------------------|------------------------------------|-----------------------------|-----------------------------|-------------------------------|-------------------------------|
| SpM1_ChORF1402_s_at     | -             | <i>spy1402</i>                       | Unknown                 | Hypothetical cytosolic Protein  | Unknown                              | Essential                             | -                                         | -32.50                                | -125.60                               | -164.32                               | 549.42                             | 3.26E-06                    | <b>7.91E-06</b>             | 1.27E-33                      | <b>0.000225</b>               |
| SpM5_ChORF270b-605_s_at | -             | <i>SpyoM5_Chr ORF_270b10.p1t_605</i> | Unknown                 | Hypothetical protein            | Unknown                              | -                                     | -                                         | -32.53                                | -8.63                                 | -22.57                                | 18.25                              | 0.0043151                   | <b>5.70E-05</b>             | 0.0098302                     | 0.002822                      |
| SpM1_ChORF0738_at       | <i>sagA</i>   | <i>spy0738</i>                       | Virulence               | Virulence interacting proteins  | Exotoxin                             | -                                     | -                                         | -32.81                                | 1407.24                               | 2910.15                               | 2379.76                            | 3.60E-30                    | <b>7.91E-06</b>             | 1.24E-33                      | <b>0.000225</b>               |
| SpM1_ChORF0174_s_at     | -             | <i>spy0174</i>                       | Membrane transport      | Membrane transport              | Unknown substrate membrane transport | -                                     | -                                         | -33.26                                | 1739.76                               | 1765.41                               | 562.88                             | 3.21E-25                    | <b>7.91E-06</b>             | 4.00E-08                      | <b>0.000225</b>               |
| SpM1_ChORF0923_s_at     | -             | <i>spy0923</i>                       | Unknown                 | Hypothetical Cytosolic Protein  | Unknown                              | -                                     | -                                         | -33.46                                | -92.39                                | -60.78                                | -17.38                             | 1.34E-10                    | <b>7.91E-06</b>             | 0.1345846                     | 0.030573                      |
| SpM1_ChORF0884_s_at     | -             | <i>spy0884</i>                       | Unknown                 | Hypothetical protein            | Unknown                              | -                                     | -                                         | -34.05                                | -172.35                               | -210.23                               | -45.35                             | 6.28E-23                    | <b>7.91E-06</b>             | 0.0001184                     | <b>0.000228</b>               |
| SpM1_ChORF1063_at       | -             | <i>spy1063</i>                       | Membrane transport      | Membrane transport              | Metal ion membrane transport         | -                                     | -                                         | -34.07                                | -68.36                                | -54.52                                | -18.14                             | 1.04E-05                    | <b>7.91E-06</b>             | 0.025225                      | 0.006741                      |
| SpM1_ChORF1159_s_at     | <i>hlyIII</i> | <i>spy1159</i>                       | Virulence               | Virulence interacting proteins  | Exotoxin                             | -                                     | -                                         | -34.29                                | -59.80                                | -91.97                                | -101.63                            | 8.76E-05                    | <b>8.18E-06</b>             | 5.37E-10                      | <b>0.000225</b>               |
| SpM1_ChORF0634_s_at     | <i>agaF</i>   | <i>spy0634</i>                       | Membrane transport      | Membrane transport              | Carbohydrate membrane transport      | -                                     | -                                         | -34.46                                | 31.48                                 | 75.04                                 | 25.49                              | 2.71E-09                    | <b>7.91E-06</b>             | 0.009837                      | 0.002822                      |
| SpM1_ChORF0106_s_at     | <i>comYD</i>  | <i>spy0106</i>                       | Membrane transport      | Membrane transport              | Quorum sensing membrane transport    | -                                     | -                                         | -34.62                                | -13.90                                | -14.58                                | 10.16                              | 0.0010171                   | <b>1.61E-05</b>             | 0.1124903                     | 0.026025                      |
| SpM12_ChORF299-49_at    | -             | <i>SpyoM12_Chr ORF_299_49</i>        | Unknown                 | Hypothetical protein            | Unknown                              | Essential                             | Essential                                 | -34.65                                | -13.50                                | -12.14                                | 29.03                              | 5.06E-06                    | <b>7.91E-06</b>             | 5.82E-07                      | <b>0.000225</b>               |
| SpM1_ChORF0534_s_at     | <i>aroE.2</i> | <i>spy0534</i>                       | Amino acid metabolism   | Amino acid biosynthesis         | Amino acid biosynthesis              | -                                     | -                                         | -34.87                                | -23.99                                | -13.08                                | 20.54                              | 6.61E-06                    | <b>7.91E-06</b>             | 9.26E-05                      | <b>0.000226</b>               |
| SpM18_ChORF0945_s_at    | -             | <i>spyM18_0945</i>                   | Unknown                 | Hypothetical protein            | Unknown                              | -                                     | -                                         | -35.02                                | -163.09                               | -203.89                               | -43.42                             | 1.91E-24                    | <b>7.91E-06</b>             | 3.29E-05                      | <b>0.000225</b>               |
| SpM1_ChORF1160_s_at     | -             | <i>spy1160</i>                       | Unknown                 | Hypothetical Cytosolic Protein  | Unknown                              | Essential                             | Essential                                 | -35.05                                | -73.26                                | -107.54                               | -39.16                             | 2.06E-15                    | <b>7.91E-06</b>             | 1.47E-07                      | <b>0.000225</b>               |
| SpM1_ChORF0146_s_at     | -             | <i>spy0146</i>                       | RNA metabolism          | Transcription r egulation       | Unknown substrate membrane transport | -                                     | -                                         | -35.42                                | 61.82                                 | 101.35                                | -0.39                              | 1.62E-14                    | <b>7.91E-06</b>             | 0.9623832                     | 0.17661                       |
| SpM1_ChORF1791_s_at     | -             | <i>spy1791</i>                       | Membrane transport      | Membrane transport              | Unknown substrate membrane transport | -                                     | -                                         | -36.47                                | -41.01                                | -58.85                                | -101.42                            | 0.0006348                   | <b>1.24E-05</b>             | 1.22E-14                      | <b>0.000225</b>               |
| SpM1_ChORF1184_s_at     | <i>oadB</i>   | <i>spy1184</i>                       | Carbohydrate metabolism | Carbohydrate central metabolism | Carbohydrate central metabolism      | -                                     | -                                         | -38.38                                | -50.39                                | -108.64                               | -81.26                             | 5.60E-13                    | <b>7.91E-06</b>             | 3.44E-14                      | <b>0.000225</b>               |
| SpM1_ChORF0105_s_at     | -             | <i>spy0105</i>                       | Unknown                 | Hypothetical protein            | Unknown                              | -                                     | -                                         | -38.72                                | -25.84                                | -15.23                                | 6.61                               | 2.46E-08                    | <b>7.91E-06</b>             | 0.149317                      | 0.033594                      |
| SpM1_ChORF0646_s_at     | -             | <i>spy0646</i>                       | Amino acid metabolism   | Amino acid catabolism           | Amino acid catabolism                | Essential                             | -                                         | -38.80                                | -143.75                               | -131.07                               | -18.18                             | 1.96E-09                    | <b>7.91E-06</b>             | 0.1004108                     | 0.023541                      |
| SpM1_ChORF0188_s_at     | <i>vlg</i>    | <i>spy0188</i>                       | RNA metabolism          | Transcription r egulation       | Unknown substrate membrane transport | -                                     | -                                         | -39.55                                | 155.70                                | 268.71                                | 83.79                              | 2.49E-10                    | <b>7.91E-06</b>             | 0.0050723                     | 0.001533                      |



| Probe Set Name*        | Gene Name   | Synonym        | Category              | Subcategory                            | Function                               | <i>Bacillus subtilis</i> <sup>†</sup> | <i>Staphylococcus aureus</i> <sup>†</sup> | Difference Time (30 - 0) <sup>‡</sup> | Difference Time (60 - 0) <sup>‡</sup> | Difference Time (90 - 0) <sup>‡</sup> | Difference (Mut - WT) <sup>‡</sup> | P-value (Time) <sup>§</sup> | Q-value (Time) <sup>§</sup> | P-value (Strain) <sup>§</sup> | Q-value (Strain) <sup>§</sup> |
|------------------------|-------------|----------------|-----------------------|----------------------------------------|----------------------------------------|---------------------------------------|-------------------------------------------|---------------------------------------|---------------------------------------|---------------------------------------|------------------------------------|-----------------------------|-----------------------------|-------------------------------|-------------------------------|
| SpM1_ChORF1829_s_at    | <i>rpsR</i> | <i>spy1829</i> | Protein synthesis     | Ribosomal proteins                     | Ribosomal protein                      | -                                     | -                                         | -40.16                                | -109.59                               | -82.59                                | -8.56                              | 0.094265                    | 0.001137                    | 0.7750697                     | 0.147233                      |
| SpM1_ChORF1120_s_at    | -           | <i>spy1120</i> | Unknown               | Hypothetical Cytosolic Protein         | Unknown                                | Essential                             | -                                         | -40.39                                | -59.61                                | -117.58                               | -27.10                             | 0.0001906                   | <b>8.80E-06</b>             | 0.0968388                     | 0.022794                      |
| SpM1_ChORF0547_s_at    | -           | <i>spy0547</i> | Unknown               | Hypothetical protein                   | Unknown                                | -                                     | -                                         | -40.44                                | -15.80                                | -23.10                                | 34.43                              | 2.67E-05                    | <b>7.91E-06</b>             | 1.75E-07                      | <b>0.000225</b>               |
| SpM1_ChORF0585_s_at    | <i>lgt</i>  | <i>spy0585</i> | Unknown               | Hypothetical protein                   | Unknown                                | -                                     | -                                         | -40.53                                | -90.54                                | -157.44                               | 20.70                              | 0.2765984                   | 0.003213                    | 0.5438198                     | 0.108897                      |
| SpM1_ChORF0497_s_at    | <i>fpg</i>  | <i>spy0497</i> | DNA metabolism        | DNA replication, modification & repair | DNA replication, modification & repair | -                                     | -                                         | -40.72                                | -97.15                                | -105.04                               | -63.08                             | 3.37E-09                    | <b>7.91E-06</b>             | 3.91E-07                      | <b>0.000225</b>               |
| SpM1_ChORF0740_s_at    | <i>sagC</i> | <i>spy0740</i> | Protein synthesis     | Protein folding & modification         | Protein modification                   | -                                     | -                                         | -40.80                                | 3027.23                               | 3532.67                               | 2866.45                            | 2.32E-28                    | <b>7.91E-06</b>             | 5.79E-28                      | <b>0.000225</b>               |
| SpM1_ChORF0929_s_at    | <i>nth</i>  | <i>spy0929</i> | DNA metabolism        | DNA replication, modification & repair | DNA replication, modification & repair | -                                     | -                                         | -41.78                                | -90.36                                | -50.78                                | -24.87                             | 0.0057416                   | <b>7.49E-05</b>             | 0.2025303                     | 0.044624                      |
| SpM1_ChORF0442_s_at    | -           | <i>spy0442</i> | Membrane transport    | Membrane transport                     | Carbohydrate membrane transport        | -                                     | -                                         | -42.00                                | 164.14                                | 148.68                                | 76.03                              | 3.73E-12                    | <b>7.91E-06</b>             | 2.10E-05                      | <b>0.000225</b>               |
| SpM1_ChORF0794_s_at    | -           | <i>spy0794</i> | Unknown               | Hypothetical protein                   | Unknown                                | -                                     | -                                         | -43.19                                | -73.32                                | -288.71                               | 30.69                              | 1.16E-08                    | <b>7.91E-06</b>             | 0.3817255                     | 0.079472                      |
| SpM1_ChORF1414_s_at    | -           | <i>spy1414</i> | Membrane transport    | Membrane transport                     | Metal ion membrane transport           | -                                     | -                                         | -44.50                                | -23.21                                | 94.30                                 | 316.54                             | 6.03E-11                    | <b>7.91E-06</b>             | 5.34E-34                      | <b>0.000225</b>               |
| SpM1_ChORF0189_s_at    | -           | <i>spy0189</i> | Unknown               | Hypothetical cytosolic protein         | Unknown                                | -                                     | -                                         | -45.50                                | 252.30                                | 434.91                                | 92.22                              | 1.37E-09                    | <b>7.91E-06</b>             | 0.0731269                     | 0.017566                      |
| SpM1_ChORF0922_s_at    | -           | <i>spy0922</i> | Other                 | GTP-binding protein                    | GTP-binding                            | -                                     | Essential                                 | -45.92                                | -118.50                               | -45.97                                | 15.93                              | 9.13E-06                    | <b>7.91E-06</b>             | 0.0653939                     | 0.015904                      |
| SpM1_ChORF1252_s_at    | -           | <i>spy1252</i> | Unknown               | Hypothetical Cytosolic Protein         | Unknown                                | -                                     | -                                         | -46.19                                | -119.95                               | -58.69                                | -1.12                              | 2.07E-07                    | <b>7.91E-06</b>             | 0.828415                      | 0.155934                      |
| SpM1_ChORF0874_s_at    | -           | <i>spy0874</i> | RNA metabolism        | Transcription regulation               | Signal transduction                    | -                                     | -                                         | -46.37                                | 106.34                                | 54.00                                 | 205.19                             | 0.0001404                   | <b>8.48E-06</b>             | 1.75E-13                      | <b>0.000225</b>               |
| SpM1_ChORF1715_s_at    | <i>copA</i> | <i>spy1715</i> | Membrane transport    | Membrane transport                     | Metal ion membrane transport           | -                                     | -                                         | -48.84                                | 170.20                                | 391.24                                | 153.03                             | 6.05E-24                    | <b>7.91E-06</b>             | 4.81E-12                      | <b>0.000225</b>               |
| SpM12_ChORF283-25_s_at | -           | <i>spy1824</i> | Amino acid metabolism | Amino acid catabolism                  | Amino acid catabolism                  | -                                     | -                                         | -49.26                                | 14.82                                 | 97.02                                 | -4.05                              | 4.15E-12                    | <b>7.91E-06</b>             | 0.7043986                     | 0.136164                      |
| SpM1_ChORF0529_s_at    | <i>vicK</i> | <i>spy0529</i> | RNA metabolism        | Transcription regulation               | Signal transduction                    | -                                     | -                                         | -51.03                                | -122.24                               | -232.21                               | -3.66                              | 7.24E-14                    | <b>7.91E-06</b>             | 0.6392419                     | 0.125013                      |
| SpM1_ChORF1971_s_at    | -           | <i>spy1971</i> | Stress adaptation     | Oxidative stress                       | Oxidative stress                       | -                                     | -                                         | -51.77                                | -84.73                                | -179.89                               | -0.77                              | 2.08E-10                    | <b>7.91E-06</b>             | 0.674243                      | 0.131055                      |
| SpM1_ChORF1794_s_at    | -           | <i>spy1794</i> | Membrane transport    | Membrane transport                     | Metal ion membrane transport           | -                                     | -                                         | -52.18                                | -45.75                                | -63.26                                | -93.28                             | 1.12E-06                    | <b>7.91E-06</b>             | 3.52E-17                      | <b>0.000225</b>               |
| SpM1_ChORF1664_s_at    | <i>mraY</i> | <i>spy1662</i> | Cell envelope         | Cell wall                              | Peptidoglycan biosynthesis             | -                                     | -                                         | -53.09                                | -324.78                               | -244.75                               | -250.34                            | 2.52E-11                    | <b>7.91E-06</b>             | 2.58E-12                      | <b>0.000225</b>               |
| SpM1_ChORF1073_s_at    | <i>rpL</i>  | <i>spy1073</i> | Protein synthesis     | Ribosomal proteins                     | Ribosomal protein                      | -                                     | -                                         | -53.15                                | -493.64                               | -851.39                               | 298.57                             | 1.26E-09                    | <b>7.91E-06</b>             | 7.02E-05                      | <b>0.000225</b>               |
| SpM1_ChORF0401_s_at    | -           | <i>spy0401</i> | Unknown               | Hypothetical protein                   | Unknown                                | -                                     | -                                         | -54.12                                | 49.20                                 | 146.91                                | -0.52                              | 1.72E-17                    | <b>7.91E-06</b>             | 0.8903396                     | 0.165053                      |

| Probe Set Name*        | Gene Name   | Synonym                     | Category                | Subcategory                            | Function                               | <i>Bacillus subtilis</i> † | <i>Staphylococcus aureus</i> † | Difference Time (30 - 0)‡ | Difference Time (60 - 0)‡ | Difference Time (90 - 0)‡ | Difference (Mut - WT)‡ | P-value (Time)§ | Q-value (Time)§ | P-value (Strain)§ | Q-value (Strain)§ |
|------------------------|-------------|-----------------------------|-------------------------|----------------------------------------|----------------------------------------|----------------------------|--------------------------------|---------------------------|---------------------------|---------------------------|------------------------|-----------------|-----------------|-------------------|-------------------|
| SpM1_ChORF2066_s_at    | -           | <i>spy2066</i>              | Amino acid metabolism   | Amino acid catabolism                  | Amino acid catabolism                  | -                          | -                              | -54.98                    | 367.92                    | 353.91                    | 307.28                 | 1.60E-18        | <b>7.91E-06</b> | 3.14E-16          | <b>0.000225</b>   |
| SpM1_ChORF0575_s_at    | -           | <i>spy0575</i>              | Unknown                 | Hypothetical protein                   | Unknown                                | -                          | -                              | -55.56                    | -136.85                   | -184.54                   | -105.16                | 8.84E-17        | <b>7.91E-06</b> | 7.58E-14          | <b>0.000225</b>   |
| SpM1_ChORF1191_s_at    | <i>oadA</i> | <i>spy1191</i>              | Carbohydrate metabolism | Carbohydrate central metabolism        | Carbohydrate central metabolism        | -                          | -                              | -55.79                    | 96.21                     | 99.44                     | -82.30                 | 1.48E-08        | <b>7.91E-06</b> | 8.89E-06          | <b>0.000225</b>   |
| SpM5_ChORF125g-81_s_at | -           | <i>spy2054</i>              | RNA metabolism          | Transcription regulation               | Hypothetical                           | -                          | -                              | -55.99                    | 1266.56                   | 1834.85                   | 435.48                 | 8.57E-34        | <b>7.91E-06</b> | 1.64E-10          | <b>0.000225</b>   |
| SpM1_ChORF0390_s_at    | -           | <i>spy0390</i>              | Unknown                 | membrane protein                       | Unknown                                | -                          | -                              | -56.71                    | -189.56                   | -238.98                   | 1.98                   | 7.07E-23        | <b>7.91E-06</b> | 0.8740543         | 0.162609          |
| SpM1_ChORF2006_s_at    | -           | <i>spy2006</i>              | Unknown                 | Hypothetical protein                   | Unknown                                | -                          | -                              | -57.28                    | -61.00                    | 46.97                     | -109.83                | 0.0001208       | <b>8.35E-06</b> | 6.44E-08          | <b>0.000225</b>   |
| SpM1_ChORF1267_s_at    | <i>pcrA</i> | <i>spy1267</i>              | DNA metabolism          | Basic replication machinery            | DNA replication                        | -                          | -                              | -58.85                    | -220.01                   | -164.29                   | -105.88                | 1.21E-17        | <b>7.91E-06</b> | 3.77E-10          | <b>0.000225</b>   |
| SpM1_ChORF2082_at      | <i>hutU</i> | <i>spy2082</i>              | Amino acid metabolism   | Amino acid catabolism                  | Amino acid catabolism                  | -                          | -                              | -59.55                    | 89.74                     | 291.67                    | 90.41                  | 5.40E-14        | <b>7.91E-06</b> | 0.0002399         | <b>0.000243</b>   |
| SpM1_ChORF0297_s_at    | <i>oppF</i> | <i>spy0297</i>              | Membrane transport      | Membrane transport                     | Peptide membrane transport             | -                          | -                              | -59.61                    | 954.41                    | 622.62                    | 622.53                 | 2.03E-08        | <b>7.91E-06</b> | 5.56E-07          | <b>0.000225</b>   |
| SpM1_ChORF1789_s_at    | -           | <i>spy1789</i>              | Unknown                 | Hypothetical protein                   | Unknown                                | -                          | -                              | -59.99                    | -57.76                    | -76.39                    | -112.99                | 0.0001773       | <b>8.71E-06</b> | 1.56E-13          | <b>0.000225</b>   |
| SpM1_ChORF0932_s_at    | -           | <i>spy0932</i>              | Carbohydrate metabolism | Bioenergetics                          |                                        | Essential                  | Essential                      | -60.38                    | -25.51                    | 19.47                     | -74.90                 | 1.47E-07        | <b>7.91E-06</b> | 7.49E-12          | <b>0.000225</b>   |
| SpM1_ChORF1189_s_at    | <i>citF</i> | <i>spy1189</i>              | Carbohydrate metabolism | Carbohydrate central metabolism        | Carbohydrate central metabolism        | Essential                  | -                              | -60.81                    | 119.20                    | 98.87                     | -113.74                | 8.39E-07        | <b>7.91E-06</b> | 1.34E-06          | <b>0.000225</b>   |
| SpM12_ChORF299-15_at   | -           | <i>SpyoM12_ChORF_299_15</i> | Unknown                 | Hypothetical protein                   | Unknown                                | -                          | -                              | -61.49                    | 6.06                      | 169.49                    | 19.21                  | 2.51E-17        | <b>7.91E-06</b> | 0.0617819         | 0.015141          |
| SpM1_ChORF0400_s_at    | <i>dnaX</i> | <i>spy0400</i>              | DNA metabolism          | Basic replication machinery            | DNA replication                        | -                          | -                              | -61.58                    | 68.75                     | 152.08                    | -22.49                 | 3.38E-08        | <b>7.91E-06</b> | 0.2001505         | 0.044183          |
| SpM1_ChORF0265_s_at    | -           | <i>spy0265</i>              | Unknown                 | Hypothetical Cytosolic Protein         | Unknown                                | -                          | -                              | -62.09                    | 143.67                    | 180.43                    | 3.30                   | 2.45E-17        | <b>7.91E-06</b> | 0.5638851         | 0.112339          |
| SpM1_ChORF1259_s_at    | -           | <i>spy1259</i>              | RNA metabolism          | Transcription regulation               |                                        | -                          | -                              | -63.34                    | 44.90                     | 295.76                    | -106.83                | 2.05E-08        | <b>7.91E-06</b> | 0.0012555         | <b>0.000461</b>   |
| SpM1_ChORF1510_s_at    | <i>mutT</i> | <i>spy1510</i>              | DNA metabolism          | DNA replication, modification & repair | DNA replication, modification & repair | -                          | -                              | -63.94                    | 67.80                     | 291.35                    | 78.77                  | 1.22E-10        | <b>7.91E-06</b> | 0.0068876         | 0.002034          |
| SpM1_ChORF0739_s_at    | <i>sagB</i> | <i>spy0739</i>              | Protein synthesis       | Protein folding & modification         | Protein modification                   | -                          | -                              | -64.45                    | 1973.00                   | 2471.35                   | 1805.26                | 1.05E-28        | <b>7.91E-06</b> | 2.22E-26          | <b>0.000225</b>   |
| SpM18_ChORF1629_s_at   | -           | <i>spyM18_1629</i>          | Unknown                 | Hypothetical protein                   | Unknown                                | -                          | -                              | -65.30                    | -51.88                    | -170.21                   | -1.44                  | 0.0002183       | <b>8.99E-06</b> | 0.5708506         | 0.113598          |
| SpM12_ChORF281-1_s_at  | -           | <i>spy1035</i>              | Cell envelope           | Cell wall                              | Peptidoglycan biosynthesis             | -                          | -                              | -65.85                    | -157.56                   | -125.08                   | -6.33                  | 5.40E-13        | <b>7.91E-06</b> | 0.395066          | 0.081862          |
| SpM1_ChORF0528_s_at    | <i>vicR</i> | <i>spy0528</i>              | RNA metabolism          | Transcription regulation               | Signal transduction                    | -                          | -                              | -66.18                    | -124.15                   | -259.88                   | 61.43                  | 2.50E-11        | <b>7.91E-06</b> | 0.0155657         | 0.004321          |
| SpM18_ChORF1715_at     | <i>nadE</i> | <i>spyM18_1715</i>          | Carbohydrate metabolism | Carbohydrate assimilation              | Carbohydrate assimilation              | Essential                  | Essential                      | -66.38                    | -58.24                    | -38.71                    | 37.49                  | 1.30E-06        | <b>7.91E-06</b> | 1.53E-05          | <b>0.000225</b>   |
| SpM1_ChORF0909_s_at    | <i>parE</i> | <i>spy0909</i>              | DNA metabolism          | DNA Packaging & segregation            | DNA packaging                          | Essential                  | -                              | -66.43                    | -326.84                   | -262.83                   | -27.98                 | 5.83E-15        | <b>7.91E-06</b> | 0.5220006         | 0.105187          |

| Probe Set Name*       | Gene Name    | Synonym                            | Category                | Subcategory                     | Function                             | <i>Bacillus subtilis</i> <sup>†</sup> | <i>Staphylococcus aureus</i> <sup>†</sup> | Difference Time (30 - 0) <sup>‡</sup> | Difference Time (60 - 0) <sup>‡</sup> | Difference Time (90 - 0) <sup>‡</sup> | Difference (Mut - WT) <sup>‡</sup> | P-value (Time) <sup>§</sup> | Q-value (Time) <sup>§</sup> | P-value (Strain) <sup>§</sup> | Q-value (Strain) <sup>§</sup> |
|-----------------------|--------------|------------------------------------|-------------------------|---------------------------------|--------------------------------------|---------------------------------------|-------------------------------------------|---------------------------------------|---------------------------------------|---------------------------------------|------------------------------------|-----------------------------|-----------------------------|-------------------------------|-------------------------------|
| SpM1_ChORF2106_s_at   | -            | <i>spy2106</i>                     | Unknown                 | Hypothetical cytosolic Protein  | Unknown                              | -                                     | -                                         | -67.81                                | 256.25                                | 430.85                                | -577.20                            | 5.45E-11                    | <b>7.91E-06</b>             | 2.24E-19                      | <b>0.000225</b>               |
| SpM1_ChORF0928_s_at   | <i>dnaD</i>  | <i>spy0928</i>                     | DNA metabolism          | Basic replication machinery     | DNA replication                      | -                                     | -                                         | -68.57                                | -72.05                                | 5.50                                  | -11.73                             | 0.0034964                   | <b>4.64E-05</b>             | 0.6382088                     | 0.12488                       |
| SpM1_ChORF0063_s_at   | <i>rpIE</i>  | <i>spy0063</i>                     | Protein synthesis       | Ribosomal proteins              | Ribosomal protein                    | -                                     | -                                         | -68.72                                | 20.48                                 | -210.66                               | -65.65                             | 0.1045737                   | 0.001258                    | 0.7320962                     | 0.140436                      |
| SpM12_ChORF221-2_s_at | -            | <i>SpyoM12_ChORF_221_2</i>         | Unknown                 | Hypothetical protein            | Unknown                              | -                                     | -                                         | -68.76                                | -71.47                                | 33.84                                 | 100.59                             | 2.29E-12                    | <b>7.91E-06</b>             | 3.11E-15                      | <b>0.000225</b>               |
| SpM1_ChORF1915_at     | <i>salA</i>  | <i>spy1915</i>                     | Virulence               | Virulence interacting proteins  | Lantibiotic, Quorum sensing          | -                                     | -                                         | -69.22                                | -117.96                               | -18.90                                | 24.23                              | 1.06E-10                    | <b>7.91E-06</b>             | 0.0286309                     | 0.007537                      |
| SpM1_ChORF2079_s_at   | <i>ahpC</i>  | <i>spy2079</i>                     | Stress adaptation       | Oxidative stress                | Oxidative stress                     | -                                     | -                                         | -69.53                                | 1865.63                               | 2912.12                               | -264.42                            | 2.51E-24                    | <b>7.91E-06</b>             | 0.0261467                     | 0.006956                      |
| SpM1_ChORF1188_s_at   | <i>citE</i>  | <i>spy1188</i>                     | Carbohydrate metabolism | Carbohydrate central metabolism | Carbohydrate central metabolism      | -                                     | -                                         | -71.06                                | 97.70                                 | 52.65                                 | -98.47                             | 2.03E-06                    | <b>7.91E-06</b>             | 1.73E-06                      | <b>0.000225</b>               |
| SpM1_ChORF0464_s_at   | -            | <i>spy0464</i>                     | Unknown                 | Hypothetical Cytosolic Protein  | Unknown                              | Essential                             | -                                         | -71.80                                | -107.92                               | -53.86                                | -19.94                             | 1.39E-08                    | <b>7.91E-06</b>             | 0.0845885                     | 0.020081                      |
| M12_0555_s_at         | -            | <i>M12_0555</i>                    | Unknown                 | Hypothetical protein            | Unknown                              | -                                     | -                                         | -73.02                                | 261.52                                | 1154.23                               | -45.44                             | 2.18E-07                    | <b>7.91E-06</b>             | 0.6254198                     | 0.122857                      |
| SpM1_ChORF1134_s_at   | <i>proWX</i> | <i>spy1134</i>                     | Membrane transport      | Membrane transport              | Osmoprotectant membrane transport    | -                                     | -                                         | -73.37                                | -88.41                                | -21.59                                | -15.77                             | 0.0007092                   | <b>1.30E-05</b>             | 0.2246651                     | 0.048918                      |
| SpM1_ChORF1561_s_at   | -            | <i>spy1561</i>                     | Unknown                 | Hypothetical cytosolic Protein  | Unknown                              | -                                     | -                                         | -73.99                                | 53.53                                 | 261.36                                | 72.27                              | 7.34E-14                    | <b>7.91E-06</b>             | 0.0016616                     | <b>0.00057</b>                |
| SpM1_ChORF0076_x_at   | <i>rpmJ</i>  | <i>spy0076</i>                     | Protein synthesis       | Ribosomal proteins              | Ribosomal protein                    | -                                     | -                                         | -74.65                                | -818.91                               | -1183.90                              | 26.71                              | 1.21E-26                    | <b>7.91E-06</b>             | 0.6425723                     | 0.125524                      |
| SpM1_ChORF1868_s_at   | <i>nupC</i>  | <i>spy1868</i>                     | Membrane transport      | Membrane transport              | Nucleotide membrane transport        | -                                     | -                                         | -74.71                                | 148.23                                | 298.10                                | -22.98                             | 1.22E-19                    | <b>7.91E-06</b>             | 0.3946118                     | 0.081816                      |
| SpM49_ChORF903-2_s_at | -            | <i>SpyoM49_ChORF_sp001_0_903_2</i> | Unknown                 | Hypothetical protein            | Unknown                              | -                                     | -                                         | -75.92                                | 13.07                                 | 19.37                                 | 125.64                             | 2.63E-08                    | <b>7.91E-06</b>             | 7.47E-17                      | <b>0.000225</b>               |
| SpM18_ChORF0672_s_at  | -            | <i>spy0605</i>                     | Stress adaptation       | Oxidative stress                | Oxidative stress                     | -                                     | -                                         | -76.24                                | -29.60                                | -79.88                                | -90.62                             | 7.04E-06                    | <b>7.91E-06</b>             | 1.77E-10                      | <b>0.000225</b>               |
| SpM1_ChORF0040_s_at   | -            | <i>spy0040</i>                     | Unknown                 | Hypothetical protein            | Unknown                              | -                                     | -                                         | -76.61                                | 200.87                                | 195.35                                | 195.30                             | 1.75E-05                    | <b>7.91E-06</b>             | 4.08E-05                      | <b>0.000225</b>               |
| SpM1_ChORF1042_s_at   | -            | <i>spy1042</i>                     | Unknown                 | Hypothetical protein            | Unknown                              | -                                     | -                                         | -76.64                                | -245.07                               | -333.19                               | -158.20                            | 7.03E-29                    | <b>7.91E-06</b>             | 3.51E-19                      | <b>0.000225</b>               |
| SpM1_ChORF1548_s_at   | -            | <i>spy1548</i>                     | Unknown                 | Hypothetical cytosolic Protein  | Unknown                              | -                                     | -                                         | -77.01                                | 16.11                                 | -15.46                                | 109.25                             | 0.0030666                   | <b>4.09E-05</b>             | 1.07E-07                      | <b>0.000225</b>               |
| SpM1_ChORF0358_s_at   | -            | <i>spy0358</i>                     | Membrane transport      | Membrane transport              | Unknown substrate membrane transport | -                                     | -                                         | -77.02                                | -187.50                               | -173.57                               | -100.14                            | 1.76E-22                    | <b>7.91E-06</b>             | 2.07E-16                      | <b>0.000225</b>               |
| SpM18_ChORF2039_s_at  | -            | <i>spyM18_2039</i>                 | Carbohydrate metabolism | Carbohydrate assimilation       | Carbohydrate assimilation            | -                                     | -                                         | -78.26                                | 812.85                                | 604.71                                | 391.61                             | 1.91E-21                    | <b>7.91E-06</b>             | 5.47E-13                      | <b>0.000225</b>               |
| SpM1_ChORF0486_s_at   | -            | <i>spy0486</i>                     | Unknown                 | Hypothetical Cytosolic Protein  | Unknown                              | -                                     | -                                         | -78.28                                | 72.12                                 | 94.41                                 | -64.20                             | 0.064402                    | 0.000786                    | 0.0878718                     | 0.020809                      |

| Probe Set Name*        | Gene Name     | Synonym            | Category                | Subcategory                            | Function                               | <i>Bacillus subtilis</i> <sup>†</sup> | <i>Staphylococcus aureus</i> <sup>†</sup> | Difference Time (30 - 0) <sup>‡</sup> | Difference Time (60 - 0) <sup>‡</sup> | Difference Time (90 - 0) <sup>‡</sup> | Difference (Mut - WT) <sup>‡</sup> | P-value (Time) <sup>§</sup> | Q-value (Time) <sup>§</sup> | P-value (Strain) <sup>§</sup> | Q-value (Strain) <sup>§</sup> |
|------------------------|---------------|--------------------|-------------------------|----------------------------------------|----------------------------------------|---------------------------------------|-------------------------------------------|---------------------------------------|---------------------------------------|---------------------------------------|------------------------------------|-----------------------------|-----------------------------|-------------------------------|-------------------------------|
| SpM1_ChORF1785_s_at    | <i>recG</i>   | <i>spy1785</i>     | DNA metabolism          | DNA replication, modification & repair | DNA replication, modification & repair | -                                     | -                                         | -78.40                                | -80.48                                | -56.94                                | -171.78                            | 2.35E-06                    | <b>7.91E-06</b>             | 5.72E-24                      | <b>0.000225</b>               |
| SpM1_ChORF1707_s_at    | <i>lacA.1</i> | <i>spy1708</i>     | Carbohydrate metabolism | Carbohydrate assimilation              | Carbohydrate assimilation              | -                                     | -                                         | -79.33                                | -79.13                                | -14.32                                | 64.36                              | 5.37E-05                    | <b>8.00E-06</b>             | 3.94E-05                      | <b>0.000225</b>               |
| SpM1_ChORF0914_s_at    | -             | <i>spy0914</i>     | Unknown                 | Hypothetical Cytosolic Protein         | Unknown                                | -                                     | -                                         | -79.44                                | -213.89                               | -308.89                               | 20.82                              | 1.82E-18                    | <b>7.91E-06</b>             | 0.6058665                     | 0.11955                       |
| SpM1_ChORF1193_s_at    | -             | <i>spy1193</i>     | Unknown                 | Hypothetical Cytosolic Protein         | Unknown                                | -                                     | -                                         | -79.45                                | 25.58                                 | 267.51                                | 74.76                              | 4.57E-12                    | <b>7.91E-06</b>             | 0.0014521                     | <b>0.000511</b>               |
| SpM12_ChORF284-30_s_at | -             | <i>spy1061</i>     | RNA metabolism          | Transcription r egulation              |                                        | -                                     | -                                         | -81.06                                | -116.46                               | -93.39                                | 2.32                               | 1.37E-07                    | <b>7.91E-06</b>             | 0.9387014                     | 0.172806                      |
| SpM1_ChORF2053_s_at    | -             | <i>spy2053</i>     | RNA metabolism          | Transcription r egulation              |                                        | -                                     | -                                         | -81.06                                | 1285.38                               | 2066.08                               | 473.37                             | 3.68E-35                    | <b>7.91E-06</b>             | 2.88E-11                      | <b>0.000225</b>               |
| SpM1_ChORF1619_s_at    | -             | <i>spy1619</i>     | Unknown                 | Hypothetical protein                   | Unknown                                | -                                     | -                                         | -81.73                                | -106.09                               | -301.65                               | -33.49                             | 7.47E-11                    | <b>7.91E-06</b>             | 0.0546873                     | 0.013515                      |
| SpM1_ChORF1995_s_at    | <i>flaR</i>   | <i>spy1995</i>     | DNA metabolism          | Packaging & segregation                | DNA packaging                          | -                                     | -                                         | -82.28                                | -26.78                                | 95.39                                 | -39.00                             | 8.99E-13                    | <b>7.91E-06</b>             | 0.0089155                     | 0.002581                      |
| SpM1_ChORF0514_s_at    | <i>ccpA</i>   | <i>spy0514</i>     | RNA metabolism          | Transcription r egulation              |                                        | -                                     | -                                         | -82.78                                | 718.01                                | 228.28                                | 603.98                             | 5.73E-09                    | <b>7.91E-06</b>             | 1.30E-11                      | <b>0.000225</b>               |
| SpM1_ChORF1524_s_at    | <i>murG</i>   | <i>spy1524</i>     | Cell envelope           | Cell wall                              | Peptidoglycan biosynthesis             | -                                     | -                                         | -83.04                                | -14.12                                | -35.31                                | -163.58                            | 0.0134328                   | <b>0.000172</b>             | 3.87E-12                      | <b>0.000225</b>               |
| SpM1_ChORF2203_s_at    | -             | <i>spy2203</i>     | Unknown                 | Hypothetical cytosolic Protein         | Unknown                                | -                                     | -                                         | -83.88                                | -212.46                               | -291.64                               | 45.55                              | 1.19E-21                    | <b>7.91E-06</b>             | 0.0111135                     | 0.003147                      |
| SpM1_ChORF1299_at      | <i>malD</i>   | <i>spy1299</i>     | Membrane transport      | Membrane transport                     | Carbohydrate membrane transport        | -                                     | -                                         | -84.52                                | 362.69                                | 1844.88                               | 343.66                             | 5.35E-24                    | <b>7.91E-06</b>             | 1.71E-05                      | <b>0.000225</b>               |
| SpM1_ChORF1043_s_at    | -             | <i>spy1043</i>     | Unknown                 | Hypothetical protein                   | Unknown                                | Essential                             | Essential                                 | -84.73                                | -181.88                               | -270.36                               | -114.15                            | 2.52E-24                    | <b>7.91E-06</b>             | 2.00E-14                      | <b>0.000225</b>               |
| SpM1_ChORF1844_s_at    | <i>recD</i>   | <i>spy1844</i>     | DNA metabolism          | DNA replication, modification & repair | DNA replication, modification & repair | -                                     | -                                         | -85.57                                | -35.39                                | -51.31                                | -43.13                             | 2.31E-05                    | <b>7.91E-06</b>             | 0.0024363                     | 0.000788                      |
| SpM1_ChORF0755_s_at    | <i>atpB</i>   | <i>spy0755</i>     | Carbohydrate metabolism | Bioenergetics                          | Bioenergetics                          | Essential                             | -                                         | -88.08                                | -304.58                               | -392.38                               | -165.11                            | 4.40E-27                    | <b>7.91E-06</b>             | 1.72E-15                      | <b>0.000225</b>               |
| SpM1_ChORF0889_s_at    | <i>rpiA</i>   | <i>spy0889</i>     | Carbohydrate metabolism | Carbohydrate assimilation              | Carbohydrate assimilation              | -                                     | -                                         | -88.32                                | -177.48                               | -198.39                               | -51.69                             | 3.37E-12                    | <b>7.91E-06</b>             | 0.0010413                     | <b>0.000405</b>               |
| SpM1_ChORF0723_s_at    | -             | <i>spyM18_0790</i> | Membrane transport      | Membrane transport                     | Carbohydrate membrane transport        | -                                     | -                                         | -88.42                                | -78.53                                | 56.95                                 | -26.77                             | 4.12E-09                    | <b>7.91E-06</b>             | 0.1449311                     | 0.032712                      |
| SpM1_ChORF1343_s_at    | -             | <i>spy1343</i>     | Unknown                 | Hypothetical cytosolic Protein         | Unknown                                | -                                     | -                                         | -89.25                                | -415.92                               | -479.30                               | -133.32                            | 1.39E-27                    | <b>7.91E-06</b>             | 7.64E-08                      | <b>0.000225</b>               |
| SpM1_ChORF1044_s_at    | -             | <i>spy1044</i>     | Unknown                 | Hypothetical protein                   | Unknown                                | Essential                             | -                                         | -89.30                                | -171.64                               | -239.95                               | -126.71                            | 3.89E-24                    | <b>7.91E-06</b>             | 1.12E-18                      | <b>0.000225</b>               |
| SpM1_ChORF2105_s_at    | <i>nrdG</i>   | <i>spy2105</i>     | Nucleotides             | Nucleotides biosynthesis               | Purine biosynthesis                    | -                                     | -                                         | -89.95                                | 182.83                                | 360.37                                | -591.08                            | 7.61E-10                    | <b>7.91E-06</b>             | 7.01E-21                      | <b>0.000225</b>               |
| SpM1_ChORF0783_s_at    | -             | <i>spy0783</i>     | Unknown                 | Hypothetical protein                   | Unknown                                | -                                     | -                                         | -91.21                                | -81.26                                | 25.00                                 | -2.43                              | 9.46E-08                    | <b>7.91E-06</b>             | 0.6990326                     | 0.135201                      |
| SpM1_ChORF1790_s_at    | -             | <i>spy1790</i>     | Membrane transport      | Membrane transport                     | Unknown substrate membrane transport   | -                                     | -                                         | -91.35                                | -110.77                               | -119.33                               | -102.94                            | 1.58E-16                    | <b>7.91E-06</b>             | 7.57E-20                      | <b>0.000225</b>               |

| Probe Set Name*     | Gene Name     | Synonym           | Category                | Subcategory                            | Function                               | <i>Bacillus subtilis</i> <sup>†</sup> | <i>Staphylococcus aureus</i> <sup>†</sup> | Difference Time (30 - 0) <sup>‡</sup> | Difference Time (60 - 0) <sup>‡</sup> | Difference Time (90 - 0) <sup>‡</sup> | Difference (Mut - WT) <sup>‡</sup> | P-value (Time) <sup>§</sup> | Q-value (Time) <sup>§</sup> | P-value (Strain) <sup>§</sup> | Q-value (Strain) <sup>§</sup> |
|---------------------|---------------|-------------------|-------------------------|----------------------------------------|----------------------------------------|---------------------------------------|-------------------------------------------|---------------------------------------|---------------------------------------|---------------------------------------|------------------------------------|-----------------------------|-----------------------------|-------------------------------|-------------------------------|
| SpM1_ChORF1779_s_at | -             | <i>spy1779</i>    | Carbohydrate metabolism | Carbohydrate central metabolism        | Carbohydrate central metabolism        | -                                     | -                                         | -91.45                                | -300.07                               | -272.95                               | -47.20                             | 5.29E-20                    | <b>7.91E-06</b>             | 0.0023434                     | 0.00076                       |
| SpM1_ChORF0866_s_at | <i>papS</i>   | <i>spy0866</i>    | RNA metabolism          | RNA modification                       | RNA modification                       | -                                     | -                                         | -91.60                                | -0.91                                 | 126.40                                | 62.37                              | 7.95E-08                    | <b>7.91E-06</b>             | 0.0033482                     | 0.001043                      |
| SpM1_ChORF0643_s_at | <i>prfB</i>   | <i>spy0643</i>    | Protein synthesis       | Translation factors                    | Translation factor                     | -                                     | -                                         | -91.90                                | -172.78                               | -104.66                               | 169.70                             | 1.05E-08                    | <b>7.91E-06</b>             | 7.58E-16                      | <b>0.000225</b>               |
| SpM1_ChORF0727_s_at | <i>gyrB</i>   | <i>spy0727</i>    | DNA metabolism          | Packaging & segregation                | DNA packaging                          | -                                     | -                                         | -91.96                                | 13.38                                 | 108.12                                | -28.22                             | 3.45E-05                    | <b>7.93E-06</b>             | 0.350922                      | 0.073626                      |
| SpM1_ChORF1986_s_at | -             | <i>spy1986</i>    | Membrane transport      | Membrane transport                     | Carbohydrate membrane transport        | -                                     | -                                         | -92.83                                | 1660.42                               | 1467.26                               | 373.53                             | 1.94E-24                    | <b>7.91E-06</b>             | 1.42E-05                      | <b>0.000225</b>               |
| SpM1_ChORF1980_s_at | -             | <i>spy1980</i>    | Unknown                 | Hypothetical cytosolic Protein         | Unknown                                | -                                     | -                                         | -93.04                                | -110.85                               | -158.72                               | -228.50                            | 1.95E-08                    | <b>7.91E-06</b>             | 1.87E-21                      | <b>0.000225</b>               |
| SpM1_ChORF2074_s_at | <i>ctsR</i>   | <i>spy2074</i>    | RNA metabolism          | Transcription r egulation              |                                        | -                                     | -                                         | -93.14                                | -124.14                               | 23.73                                 | -67.06                             | 2.08E-05                    | <b>7.91E-06</b>             | 0.0042547                     | 0.001302                      |
| SpM1_ChORF0895_s_at | <i>cpsX</i>   | <i>spy0895</i>    | RNA metabolism          | Transcription r egulation              | Signal transduction                    | -                                     | -                                         | -93.38                                | -6.97                                 | -71.18                                | -78.15                             | 0.0092525                   | <b>0.00012</b>              | 0.0043555                     | 0.00133                       |
| SpM1_ChORF0793_s_at | -             | <i>spy0793</i>    | Unknown                 | Hypothetical protein                   | Unknown                                | -                                     | -                                         | -95.33                                | -128.00                               | -268.34                               | -14.17                             | 2.94E-15                    | <b>7.91E-06</b>             | 0.6311562                     | 0.123638                      |
| SpM1_ChORF1291_s_at | <i>glgP</i>   | <i>spy1291</i>    | Carbohydrate metabolism | Carbohydrate assimilation              | Carbohydrate assimilation              | -                                     | -                                         | -95.92                                | 406.35                                | 278.61                                | -39.69                             | 4.91E-16                    | <b>7.91E-06</b>             | 0.4609183                     | 0.094114                      |
| SpM3_ChORF0995_at   | -             | <i>Spym3_0995</i> | Unknown                 | Hypothetical protein                   | Unknown                                | -                                     | -                                         | -96.88                                | -188.29                               | -235.19                               | -41.59                             | 4.77E-16                    | <b>7.91E-06</b>             | 0.0050829                     | 0.001535                      |
| SpM1_ChORF1298_at   | <i>malA</i>   | <i>spy1298</i>    | Carbohydrate metabolism | Carbohydrate assimilation              | Carbohydrate assimilation              | -                                     | -                                         | -97.06                                | 286.52                                | 1850.85                               | 337.58                             | 1.50E-24                    | <b>7.91E-06</b>             | 1.17E-05                      | <b>0.000225</b>               |
| SpM1_ChORF1992_s_at | -             | <i>spy1992</i>    | Unknown                 | Hypothetical protein                   | Unknown                                | -                                     | -                                         | -97.43                                | 18.58                                 | 111.81                                | -51.22                             | 2.66E-07                    | <b>7.91E-06</b>             | 0.0315959                     | 0.008237                      |
| SpM3_ChORF0820_s_at | <i>topA</i>   | <i>spy1164</i>    | DNA metabolism          | Packaging & segregation                | DNA packaging                          | Essential                             | -                                         | -98.19                                | -263.54                               | -269.56                               | 32.41                              | 1.17E-15                    | <b>7.91E-06</b>             | 0.0233152                     | 0.006288                      |
| SpM1_ChORF1916_s_at | <i>lacG</i>   | <i>spy1916</i>    | Carbohydrate metabolism | Carbohydrate assimilation              | Carbohydrate assimilation              | -                                     | -                                         | -98.92                                | -147.70                               | -89.86                                | -8.04                              | 3.18E-13                    | <b>7.91E-06</b>             | 0.5753282                     | 0.11423                       |
| SpM1_ChORF0444_s_at | -             | <i>spy0444</i>    | Unknown                 | Hypothetical protein                   | Unknown                                | -                                     | -                                         | -99.05                                | -104.63                               | -159.46                               | -337.12                            | 0.001081                    | <b>1.68E-05</b>             | 1.18E-17                      | <b>0.000225</b>               |
| SpM1_ChORF1707_at   | <i>lacB.1</i> | <i>spy1707</i>    | Carbohydrate metabolism | Carbohydrate assimilation              | Carbohydrate assimilation              | -                                     | -                                         | -99.17                                | -88.37                                | -20.77                                | 79.16                              | 7.14E-06                    | <b>7.91E-06</b>             | 3.05E-06                      | <b>0.000225</b>               |
| SpM1_ChORF1973_at   | <i>dexB</i>   | <i>spy1973</i>    | Carbohydrate metabolism | Carbohydrate assimilation              | Carbohydrate assimilation              | -                                     | -                                         | -99.85                                | 987.56                                | 753.63                                | 535.04                             | 5.06E-19                    | <b>7.91E-06</b>             | 8.10E-13                      | <b>0.000225</b>               |
| SpM1_ChORF0447_s_at | <i>pfs</i>    | <i>spy0447</i>    | Carbohydrate metabolism | Carbohydrate assimilation              | Carbohydrate assimilation              | -                                     | -                                         | -101.72                               | -207.81                               | -227.26                               | -687.40                            | 0.120954                    | 0.001445                    | 1.05E-11                      | <b>0.000225</b>               |
| SpM1_ChORF0875_s_at | -             | <i>spy0875</i>    | RNA metabolism          | Transcription r egulation              | Signal transduction                    | -                                     | -                                         | -102.60                               | 321.45                                | 100.87                                | 328.70                             | 4.09E-05                    | <b>7.95E-06</b>             | 5.45E-09                      | <b>0.000225</b>               |
| SpM1_ChORF1781_s_at | -             | <i>spy1781</i>    | Unknown                 | Hypothetical protein                   | Unknown                                | -                                     | -                                         | -102.88                               | -108.76                               | -317.31                               | -283.26                            | 6.02E-06                    | <b>7.91E-06</b>             | 1.48E-09                      | <b>0.000225</b>               |
| SpM1_ChORF0776_s_at | <i>rexB</i>   | <i>spy0776</i>    | DNA metabolism          | DNA replication, modification & repair | DNA replication, modification & repair | -                                     | -                                         | -104.15                               | -146.03                               | -214.77                               | -66.54                             | 4.75E-24                    | <b>7.91E-06</b>             | 1.61E-09                      | <b>0.000225</b>               |
| SpM1_ChORF1621_s_at | <i>rr03</i>   | <i>spy1621</i>    | RNA metabolism          | Transcription r egulation              | Signal transduction                    | -                                     | -                                         | -104.70                               | 190.00                                | 7.76                                  | 72.26                              | 3.90E-08                    | <b>7.91E-06</b>             | 0.0209814                     | 0.005698                      |
| SpM1_ChORF0836_s_at | -             | <i>spy0836</i>    | Membrane transport      | Membrane transport                     | Unknown substrate membrane transport   | -                                     | -                                         | -104.77                               | 781.55                                | 152.68                                | 120.73                             | 3.30E-10                    | <b>7.91E-06</b>             | 0.1518157                     | 0.034113                      |

| Probe Set Name*         | Gene Name        | Synonym                            | Category                | Subcategory                            | Function                               | <i>Bacillus subtilis</i> <sup>†</sup> | <i>Staphylococcus aureus</i> <sup>†</sup> | Difference Time (30 - 0) <sup>‡</sup> | Difference Time (60 - 0) <sup>‡</sup> | Difference Time (90 - 0) <sup>‡</sup> | Difference (Mut - WT) <sup>‡</sup> | P-value (Time) <sup>§</sup> | Q-value (Time) <sup>§</sup> | P-value (Strain) <sup>§</sup> | Q-value (Strain) <sup>§</sup> |
|-------------------------|------------------|------------------------------------|-------------------------|----------------------------------------|----------------------------------------|---------------------------------------|-------------------------------------------|---------------------------------------|---------------------------------------|---------------------------------------|------------------------------------|-----------------------------|-----------------------------|-------------------------------|-------------------------------|
| SpM1_ChORF1708_s_at     | -                | <i>spy1709</i>                     | Membrane transport      | Membrane transport                     | Carbohydrate membrane transport        | -                                     | -                                         | -106.92                               | -85.60                                | -5.57                                 | 106.76                             | 2.07E-05                    | <b>7.91E-06</b>             | 3.34E-07                      | <b>0.000225</b>               |
| SpM1_ChORF1143_s_at     | -                | <i>spy1143</i>                     | Unknown                 | Conserved protein                      | Unknown                                | -                                     | -                                         | -107.93                               | -118.21                               | -298.80                               | 78.68                              | 1.86E-08                    | <b>7.91E-06</b>             | 0.003016                      | 0.000949                      |
| SpM1_ChORF0366_s_at     | <i>dyr, scpA</i> | <i>spy0366</i>                     | DNA metabolism          | Packaging & segregation                | DNA packaging                          | -                                     | -                                         | -108.79                               | -120.61                               | -278.78                               | 34.71                              | 4.60E-24                    | <b>7.91E-06</b>             | 0.0093569                     | 0.002693                      |
| SpM1_ChORF1062_s_at     | <i>yesM</i>      | <i>spy1062</i>                     | RNA metabolism          | Transcription regulation               | Signal transduction                    | -                                     | -                                         | -108.84                               | -113.70                               | -52.19                                | 3.53                               | 1.84E-09                    | <b>7.91E-06</b>             | 0.9726982                     | 0.178039                      |
| SpM1_ChORF1823_s_at     | <i>comEB</i>     | <i>spy1823</i>                     | Membrane transport      | Membrane transport                     | Quorum sensing membrane transport      | -                                     | -                                         | -109.46                               | 8.10                                  | 189.06                                | 0.69                               | 3.28E-16                    | <b>7.91E-06</b>             | 0.7054305                     | 0.136276                      |
| SpM1_ChORF1600_s_at     | <i>hyl</i>       | <i>spy1600</i>                     | Carbohydrate metabolism | Carbohydrate assimilation              | Carbohydrate assimilation              | -                                     | -                                         | -109.50                               | 457.45                                | 669.37                                | 202.24                             | 5.47E-22                    | <b>7.91E-06</b>             | 4.43E-07                      | <b>0.000225</b>               |
| SpM1_ChORF2119_s_at     | <i>ruvA</i>      | <i>spy2119</i>                     | DNA metabolism          | DNA replication, modification & repair | DNA replication, modification & repair | -                                     | -                                         | -109.51                               | -157.77                               | -426.98                               | -339.97                            | 8.52E-09                    | <b>7.91E-06</b>             | 9.50E-11                      | <b>0.000225</b>               |
| SpM1_ChORF0264_s_at     | <i>rpe</i>       | <i>spy0264</i>                     | Carbohydrate metabolism |                                        |                                        | -                                     | -                                         | -109.60                               | 331.02                                | 306.96                                | 64.44                              | 1.22E-15                    | <b>7.91E-06</b>             | 0.0207049                     | 0.005636                      |
| SpM1_ChORF0226_s_at     | <i>gpsA</i>      | <i>spy0226</i>                     | Cell envelope           | Membrane lipids                        | Phospholipids biosynthesis             | -                                     | -                                         | -109.82                               | -418.71                               | -532.09                               | -86.33                             | 5.08E-20                    | <b>7.91E-06</b>             | 0.0003948                     | <b>0.000269</b>               |
| SpM12_ChORF236-7_s_at   | -                | <i>SpyoM12_ChORF_236_7</i>         | Unknown                 | Hypothetical protein                   | Unknown                                | Essential                             | Essential                                 | -109.92                               | -229.88                               | -246.48                               | -76.47                             | 2.26E-13                    | <b>7.91E-06</b>             | 0.0001444                     | <b>0.00023</b>                |
| SpM1_ChORF0296_s_at     | <i>oppD</i>      | <i>spy0296</i>                     | Membrane transport      | Membrane transport                     | Peptide membrane transport             | -                                     | -                                         | -110.74                               | 729.42                                | 544.33                                | 515.17                             | 2.26E-14                    | <b>7.91E-06</b>             | 6.04E-11                      | <b>0.000225</b>               |
| SpM1_ChORF1603_s_at     | -                | <i>spy1603</i>                     | Unknown                 | Hypothetical cytosolic Protein         | Unknown                                | -                                     | -                                         | -112.08                               | 88.17                                 | 224.82                                | 36.63                              | 3.22E-17                    | <b>7.91E-06</b>             | 0.0268443                     | 0.007125                      |
| SpM1_ChORF1055_s_at     | <i>csrA</i>      | <i>spy1055</i>                     | Unknown                 | Hypothetical protein                   | Unknown                                | -                                     | Essential                                 | -114.11                               | -91.37                                | 37.15                                 | 57.32                              | 0.0013632                   | <b>1.98E-05</b>             | 0.1702031                     | 0.037929                      |
| SpM1_ChORF0367_s_at     | <i>scpB</i>      | <i>spy0367</i>                     | DNA metabolism          | Packaging & segregation                | DNA packaging                          | Essential                             | -                                         | -114.83                               | -117.21                               | -231.57                               | 22.55                              | 1.55E-17                    | <b>7.91E-06</b>             | 0.0627232                     | 0.01535                       |
| SpM1_ChORF0855_s_at     | <i>fruA</i>      | <i>spy0855</i>                     | Membrane transport      | Membrane transport                     | Carbohydrate membrane transport        | Essential                             | -                                         | -115.74                               | 90.67                                 | 0.30                                  | 62.90                              | 0.003106                    | <b>4.14E-05</b>             | 0.0895133                     | 0.021184                      |
| SpM1_ChORF0741_s_at     | <i>sagD</i>      | <i>spy0741</i>                     | Protein synthesis       | Protein folding & modification         | Protein modification                   | -                                     | -                                         | -116.00                               | 2738.23                               | 3262.97                               | 2830.14                            | 1.66E-29                    | <b>7.91E-06</b>             | 1.83E-30                      | <b>0.000225</b>               |
| SpM1_ChORF1730_s_at     | <i>hit</i>       | <i>spy1730</i>                     | RNA metabolism          | Transcription regulation               |                                        | -                                     | -                                         | -116.58                               | 818.62                                | 702.53                                | 254.91                             | 2.85E-19                    | <b>7.91E-06</b>             | 1.91E-05                      | <b>0.000225</b>               |
| SpM1_ChORF1190_s_at     | <i>citX</i>      | <i>spy1190</i>                     | Carbohydrate metabolism | Carbohydrate central metabolism        | Carbohydrate central metabolism        | -                                     | -                                         | -117.70                               | 158.40                                | 184.26                                | -114.55                            | 3.64E-12                    | <b>7.91E-06</b>             | 4.24E-05                      | <b>0.000225</b>               |
| SpM1_ChORF2113_s_at     | -                | <i>spy2113</i>                     | RNA metabolism          | Transcription regulation               |                                        | -                                     | -                                         | -120.02                               | 870.86                                | 36.37                                 | -100.70                            | 8.32E-08                    | <b>7.91E-06</b>             | 0.1480553                     | 0.033353                      |
| SpM1_ChORF1991_s_at     | <i>trpG</i>      | <i>spy1991</i>                     | Unknown                 | Hypothetical protein                   | Unknown                                | -                                     | -                                         | -120.02                               | -59.47                                | -31.48                                | -33.69                             | 0.0001437                   | <b>8.49E-06</b>             | 0.1055202                     | 0.024532                      |
| SpM5_ChORF270b-210_s_at | -                | <i>SpyoM5_ChORF_270b10.p1t_210</i> | Unknown                 | Hypothetical protein                   | Unknown                                | -                                     | -                                         | -122.54                               | -47.96                                | -9.44                                 | 114.97                             | 1.03E-05                    | <b>7.91E-06</b>             | 8.74E-08                      | <b>0.000225</b>               |
| SpM1_ChORF0775_s_at     | -                | <i>spy0775</i>                     | Unknown                 | Hypothetical membrane protein          | Unknown                                | -                                     | -                                         | -122.97                               | -87.68                                | -97.74                                | 236.60                             | 1.30E-05                    | <b>7.91E-06</b>             | 9.24E-22                      | <b>0.000225</b>               |

| Probe Set Name*       | Gene Name             | Synonym            | Category                | Subcategory                    | Function                             | <i>Bacillus subtilis</i> <sup>†</sup> | <i>Staphylococcus aureus</i> <sup>†</sup> | Difference Time (30 - 0) <sup>‡</sup> | Difference Time (60 - 0) <sup>‡</sup> | Difference Time (90 - 0) <sup>‡</sup> | Difference (Mut - WT) <sup>‡</sup> | P-value (Time) <sup>§</sup> | Q-value (Time) <sup>§</sup> | P-value (Strain) <sup>§</sup> | Q-value (Strain) <sup>§</sup> |
|-----------------------|-----------------------|--------------------|-------------------------|--------------------------------|--------------------------------------|---------------------------------------|-------------------------------------------|---------------------------------------|---------------------------------------|---------------------------------------|------------------------------------|-----------------------------|-----------------------------|-------------------------------|-------------------------------|
| SpM1_ChORF0814_s_at   | <i>folC.2</i>         | <i>spy0814</i>     | Cofactors               | Folate                         | Folate biosynthesis                  | -                                     | -                                         | -123.12                               | -331.04                               | -444.00                               | -145.92                            | 4.61E-22                    | <b>7.91E-06</b>             | 3.62E-08                      | <b>0.000225</b>               |
| SpM1_ChORF0432_x_at   | -                     | <i>spy0432</i>     | Unknown                 | Hypothetical protein           | Unknown                              | -                                     | -                                         | -123.55                               | 101.38                                | 108.60                                | -163.92                            | 1.03E-10                    | <b>7.91E-06</b>             | 1.83E-10                      | <b>0.000225</b>               |
| SpM1_ChORF1813_at     | <i>endoS</i>          | <i>spy1813</i>     | Carbohydrate metabolism | Carbohydrate assimilation      | Carbohydrate assimilation            | -                                     | -                                         | -123.84                               | 61.76                                 | 622.15                                | 269.15                             | 4.62E-23                    | <b>7.91E-06</b>             | 1.30E-12                      | <b>0.000225</b>               |
| SpM1_ChORF0838_s_at   | -                     | <i>spy0838</i>     | Membrane transport      | Membrane transport             | Unknown substrate membrane transport | -                                     | -                                         | -124.09                               | 341.46                                | 156.12                                | 9.20                               | 6.49E-13                    | <b>7.91E-06</b>             | 0.829741                      | 0.1561                        |
| SpM1_ChORF1602_s_at   | -                     | <i>spy1602</i>     | RNA metabolism          | Transcription regulation       |                                      | -                                     | -                                         | -125.03                               | 168.36                                | 217.46                                | 108.86                             | 1.07E-17                    | <b>7.91E-06</b>             | 7.89E-07                      | <b>0.000225</b>               |
| SpM1_ChORF0363_s_at   | -                     | <i>spy0363</i>     | Unknown                 | Hypothetical protein           | Unknown                              | -                                     | -                                         | -125.23                               | -201.37                               | -428.98                               | 93.92                              | 9.70E-20                    | <b>7.91E-06</b>             | 0.0001095                     | <b>0.000227</b>               |
| SpM1_ChORF1704_s_at   | <i>lacD.1</i>         | <i>spy1704</i>     | Carbohydrate metabolism | Carbohydrate assimilation      | Carbohydrate assimilation            | -                                     | -                                         | -125.78                               | -91.89                                | 68.56                                 | 129.99                             | 8.58E-09                    | <b>7.91E-06</b>             | 4.63E-08                      | <b>0.000225</b>               |
| SpM1_ChORF0077_s_at   | <i>rpsM</i>           | <i>spy0077</i>     | Protein synthesis       | Ribosomal proteins             | Ribosomal protein                    | -                                     | -                                         | -125.84                               | -799.04                               | -1117.61                              | 30.23                              | 4.84E-29                    | <b>7.91E-06</b>             | 0.6041736                     | 0.119283                      |
| SpM1_ChORF0891_s_at   | <i>arsC</i>           | <i>spy0891</i>     | Membrane transport      | Membrane transport             | Unknown substrate membrane transport | -                                     | -                                         | -126.25                               | -151.75                               | -174.81                               | -78.68                             | 2.62E-13                    | <b>7.91E-06</b>             | 6.22E-08                      | <b>0.000225</b>               |
| SpM12_ChORF212-2_s_at | -                     | <i>spy0440</i>     | Unknown                 | Hypothetical protein           | Unknown                              | -                                     | Essential                                 | -126.65                               | -193.96                               | -264.39                               | -51.83                             | 2.43E-21                    | <b>7.91E-06</b>             | 7.91E-05                      | <b>0.000225</b>               |
| SpM1_ChORF0369_s_at   | -                     | <i>spy0369</i>     | Unknown                 | Hypothetical protein           | Unknown                              | -                                     | -                                         | -127.97                               | -106.94                               | -273.52                               | 69.77                              | 3.71E-20                    | <b>7.91E-06</b>             | 1.67E-05                      | <b>0.000225</b>               |
| SpM1_ChORF1345_s_at   | -                     | <i>spy1345</i>     | Unknown                 | Hypothetical cytosolic Protein | Unknown                              | -                                     | -                                         | -129.10                               | -49.72                                | -13.31                                | 122.69                             | 1.02E-05                    | <b>7.91E-06</b>             | 4.42E-08                      | <b>0.000225</b>               |
| SpM1_ChORF0813_at     | <i>gor/gpo A/gshR</i> | <i>spy0813</i>     | Stress adaptation       | Oxidative stress               | Oxidative stress                     | -                                     | -                                         | -129.25                               | 79.49                                 | 238.83                                | -64.24                             | 5.66E-12                    | <b>7.91E-06</b>             | 0.0312319                     | 0.00816                       |
| SpM1_ChORF0714_s_at   | <i>adcA</i>           | <i>spy0714</i>     | Membrane transport      | Membrane transport             | Metal ion membrane transport         | -                                     | -                                         | -129.27                               | -314.29                               | -255.73                               | -70.98                             | 1.68E-18                    | <b>7.91E-06</b>             | 0.0012644                     | <b>0.000462</b>               |
| SpM1_ChORF1158_s_at   | -                     | <i>spy1158</i>     | Cell envelope           | Membrane lipids                | Phospholipids biosynthesis           | -                                     | -                                         | -129.80                               | -78.73                                | -92.42                                | -112.89                            | 7.47E-05                    | <b>8.11E-06</b>             | 4.38E-08                      | <b>0.000225</b>               |
| SpM1_ChORF1147_s_at   | <i>pvaA</i>           | <i>spy1147</i>     | Unknown                 | Hypothetical protein           | Unknown                              | -                                     | -                                         | -130.19                               | -24.94                                | -85.03                                | 51.32                              | 2.94E-05                    | <b>7.91E-06</b>             | 0.0024772                     | 0.000799                      |
| SpM1_ChORF0576_s_at   | -                     | <i>spy0576</i>     | Unknown                 | Hypothetical membrane protein  | Unknown                              | -                                     | -                                         | -130.54                               | -187.95                               | -218.86                               | -75.93                             | 1.69E-13                    | <b>7.91E-06</b>             | 6.54E-07                      | <b>0.000225</b>               |
| SpM1_ChORF0713_s_at   | <i>pepD</i>           | <i>spy0713</i>     | Amino acid metabolism   | Amino acid catabolism          | Amino acid catabolism                | -                                     | -                                         | -130.71                               | 26.89                                 | -39.65                                | -63.73                             | 8.81E-05                    | <b>8.18E-06</b>             | 0.004446                      | 0.001353                      |
| SpM1_ChORF0280_s_at   | <i>bacA</i>           | <i>spy0280</i>     | Cell envelope           | Cell wall                      | Peptidoglycan biosynthesis           | -                                     | -                                         | -130.96                               | -116.49                               | -134.33                               | 3.94                               | 1.37E-14                    | <b>7.91E-06</b>             | 0.9835693                     | 0.179747                      |
| SpM1_ChORF0784_s_at   | <i>rmlD</i>           | <i>spy0784</i>     | Unknown                 | Hypothetical protein           | Unknown                              | -                                     | -                                         | -131.43                               | -146.38                               | -27.57                                | 43.29                              | 8.08E-10                    | <b>7.91E-06</b>             | 0.0008746                     | <b>0.000366</b>               |
| SpM1_ChORF1564_s_at   | -                     | <i>spy1564</i>     | Unknown                 | Hypothetical cytosolic Protein | Unknown                              | -                                     | -                                         | -132.65                               | 179.58                                | 449.54                                | 188.13                             | 5.63E-21                    | <b>7.91E-06</b>             | 2.58E-09                      | <b>0.000225</b>               |
| SpM18_ChORF0632_s_at  | -                     | <i>spyM18_0632</i> | Unknown                 | Hypothetical protein           | Unknown                              | -                                     | -                                         | -132.79                               | 166.61                                | 180.52                                | -152.06                            | 1.71E-06                    | <b>7.91E-06</b>             | 0.0002642                     | <b>0.000247</b>               |
| SpM1_ChORF1523_s_at   | <i>divIB</i>          | <i>spy1523</i>     | Cell shape and division | Cell shape & division          | Cell division                        | -                                     | -                                         | -135.41                               | -54.58                                | -29.30                                | -257.75                            | 0.0055285                   | <b>7.22E-05</b>             | 2.45E-12                      | <b>0.000225</b>               |

| Probe Set Name*          | Gene Name     | Synonym                                 | Category              | Subcategory                            | Function                               | <i>Bacillus subtilis</i> <sup>†</sup> | <i>Staphylococcus aureus</i> <sup>†</sup> | Difference Time (30 - 0) <sup>‡</sup> | Difference Time (60 - 0) <sup>‡</sup> | Difference Time (90 - 0) <sup>‡</sup> | Difference (Mut - WT) <sup>‡</sup> | P-value (Time) <sup>§</sup> | Q-value (Time) <sup>§</sup> | P-value (Strain) <sup>§</sup> | Q-value (Strain) <sup>§</sup> |
|--------------------------|---------------|-----------------------------------------|-----------------------|----------------------------------------|----------------------------------------|---------------------------------------|-------------------------------------------|---------------------------------------|---------------------------------------|---------------------------------------|------------------------------------|-----------------------------|-----------------------------|-------------------------------|-------------------------------|
| SpM18_ChORF0630_s_at     | -             | <i>spyM18_0630</i>                      | Phage                 | Phage proteins                         |                                        | -                                     | -                                         | -136.85                               | 66.48                                 | 125.60                                | -106.37                            | 7.47E-15                    | <b>7.91E-06</b>             | 1.56E-07                      | <b>0.000225</b>               |
| SpM1_ChORF1565_s_at      | -             | <i>spy1565</i>                          | Unknown               | Hypothetical cytosolic Protein         | Unknown                                | -                                     | -                                         | -138.44                               | 120.11                                | 295.23                                | 178.13                             | 1.49E-15                    | <b>7.91E-06</b>             | 1.63E-08                      | <b>0.000225</b>               |
| SpM1_ChORF1581_s_at      | -             | <i>spy1581</i>                          | Unknown               | Hypothetical cytosolic Protein         | Unknown                                | -                                     | -                                         | -138.61                               | -133.57                               | -162.96                               | 42.64                              | 1.01E-06                    | <b>7.91E-06</b>             | 0.0803287                     | 0.019178                      |
| SpM18_ChORF0196_s_at     | -             | <i>spyM18_0196</i>                      | Nucleotides           | Nucleotides metabolism                 | Pyrimidine salvage                     | -                                     | -                                         | -138.65                               | -271.41                               | -408.20                               | -72.95                             | 1.57E-08                    | <b>7.91E-06</b>             | 0.0653439                     | 0.015903                      |
| SpM1_ChORF1976_s_at      | <i>msmK</i>   | <i>spy1976</i>                          | Membrane transport    | Membrane transport                     | Carbohydrate membrane transport        | -                                     | -                                         | -138.66                               | 1805.86                               | 1644.34                               | 752.46                             | 2.65E-28                    | <b>7.91E-06</b>             | 3.16E-13                      | <b>0.000225</b>               |
| SpM1_ChORF1352_s_at      | <i>aroA</i>   | <i>spy1352</i>                          | Amino acid metabolism | Amino acid biosynthesis                | Amino acid biosynthesis                | Essential                             | Essential                                 | -143.61                               | 88.40                                 | 174.21                                | 750.22                             | 1.46E-16                    | <b>7.91E-06</b>             | 1.17E-45                      | <b>0.000225</b>               |
| SpM1_ChORF1680_s_at      | -             | <i>spy1680</i>                          | RNA metabolism        | Transcription regulation               |                                        | -                                     | -                                         | -146.19                               | 621.46                                | 699.05                                | 98.39                              | 1.11E-20                    | <b>7.91E-06</b>             | 0.032985                      | 0.008561                      |
| SpM1_ChORF2060_s_at      | -             | <i>spy2060</i>                          | Unknown               | Hypothetical cytosolic Protein         | Unknown                                | -                                     | -                                         | -146.49                               | -129.40                               | -376.08                               | 285.21                             | 2.89E-12                    | <b>7.91E-06</b>             | 3.73E-14                      | <b>0.000225</b>               |
| SpM1_ChORF2045_s_at      | -             | <i>spy2045</i>                          | Unknown               | Hypothetical cytosolic Protein         | Unknown                                | -                                     | -                                         | -146.77                               | 22.66                                 | 156.17                                | 103.81                             | 1.29E-11                    | <b>7.91E-06</b>             | 0.0001591                     | <b>0.000232</b>               |
| SpM1_ChORF0880_s_at      | <i>mvaS.1</i> | <i>spy0880</i>                          | Lipid metabolism      | Isoprenoids                            | Isoprenoid biosynthesis                | Essential                             | -                                         | -146.94                               | -284.29                               | -323.80                               | -70.50                             | 2.63E-28                    | <b>7.91E-06</b>             | 1.85E-07                      | <b>0.000225</b>               |
| SpM1_ChORF0065_s_at      | <i>tpsH</i>   | <i>spy0065</i>                          | Protein synthesis     | Ribosomal proteins                     | Ribosomal protein                      | -                                     | -                                         | -147.50                               | -79.73                                | -382.86                               | 14.29                              | 0.004949                    | <b>6.50E-05</b>             | 0.4591945                     | 0.093822                      |
| SpM1_ChORF0382_s_at      | -             | <i>spy0382</i>                          | Unknown               | Hypothetical Cytosolic Protein         | Unknown                                | -                                     | -                                         | -148.38                               | -271.97                               | -252.42                               | -1.07                              | 1.00E-06                    | <b>7.91E-06</b>             | 0.9005304                     | 0.166477                      |
| SpM1_ChORF0342_s_at      | <i>snf</i>    | <i>spy0342</i>                          | DNA metabolism        | DNA replication, modification & repair | DNA replication, modification & repair | -                                     | -                                         | -148.44                               | -49.36                                | -50.95                                | 30.60                              | 3.40E-07                    | <b>7.91E-06</b>             | 0.0513202                     | 0.012764                      |
| SpM5_ChORFJ7578C-81_s_at | -             | <i>SpyoM5_Chr ORF_J7578C e05.s1c_81</i> | Unknown               | Hypothetical protein                   | Unknown                                | -                                     | -                                         | -150.46                               | -94.15                                | -10.05                                | -265.01                            | 0.0009247                   | <b>1.51E-05</b>             | 3.94E-13                      | <b>0.000225</b>               |
| SpM1_ChORF0878_s_at      | <i>mvaK2</i>  | <i>spy0878</i>                          | Lipid metabolism      | Isoprenoids                            | Isoprenoid biosynthesis                | -                                     | -                                         | -151.34                               | -227.50                               | -132.91                               | -111.96                            | 9.68E-07                    | <b>7.91E-06</b>             | 0.0002547                     | <b>0.000246</b>               |
| SpM1_ChORF1770_s_at      | <i>gatB</i>   | <i>spy1770</i>                          | Protein synthesis     | tRNA synthetases                       | tRNA synthetase                        | -                                     | -                                         | -153.55                               | -348.70                               | -511.13                               | -462.10                            | 4.15E-10                    | <b>7.91E-06</b>             | 3.18E-13                      | <b>0.000225</b>               |
| SpM1_ChORF1582_s_at      | -             | <i>spy1582</i>                          | Cofactors             |                                        | Quinone biosynthesis                   | -                                     | -                                         | -156.35                               | -74.96                                | -76.01                                | 61.90                              | 7.77E-12                    | <b>7.91E-06</b>             | 1.66E-05                      | <b>0.000225</b>               |
| SpM1_ChORF1562_s_at      | -             | <i>spy1562</i>                          | Unknown               | Hypothetical protein                   | Unknown                                | -                                     | -                                         | -156.71                               | 78.98                                 | 343.41                                | 126.75                             | 1.68E-18                    | <b>7.91E-06</b>             | 7.25E-06                      | <b>0.000225</b>               |
| SpM1_ChORF2033_s_at      | -             | <i>spy2033</i>                          | Unknown               | Hypothetical protein                   | Unknown                                | -                                     | -                                         | -157.68                               | 1962.71                               | 1838.17                               | -510.37                            | 1.22E-22                    | <b>7.91E-06</b>             | 1.39E-05                      | <b>0.000225</b>               |
| SpM1_ChORF0351_s_at      | -             | <i>spy0351</i>                          | Unknown               | Hypothetical membrane protein          | Unknown                                | Essential                             | -                                         | -158.93                               | -320.61                               | -252.15                               | 51.98                              | 4.73E-09                    | <b>7.91E-06</b>             | 0.0932964                     | 0.022034                      |
| SpM1_ChORF0653_s_at      | -             | <i>spy0653</i>                          | Membrane transport    | Membrane transport                     | Polyamine membrane transport           | -                                     | -                                         | -159.46                               | -116.47                               | -149.46                               | -19.59                             | 6.07E-07                    | <b>7.91E-06</b>             | 0.3538572                     | 0.074198                      |
| SpM1_ChORF1802_s_at      | <i>alr</i>    | <i>spy1802</i>                          | Cell envelope         | Cell wall                              | Peptidoglycan biosynthesis             | -                                     | -                                         | -160.93                               | 0.09                                  | 295.75                                | -94.15                             | 1.38E-17                    | <b>7.91E-06</b>             | 0.0015801                     | <b>0.000546</b>               |



| Probe Set Name*        | Gene Name    | Synonym                                | Category                | Subcategory                            | Function                               | <i>Bacillus subtilis</i> <sup>†</sup> | <i>Staphylococcus aureus</i> <sup>†</sup> | Difference Time (30 - 0) <sup>‡</sup> | Difference Time (60 - 0) <sup>‡</sup> | Difference Time (90 - 0) <sup>‡</sup> | Difference (Mut - WT) <sup>‡</sup> | P-value (Time) <sup>§</sup> | Q-value (Time) <sup>§</sup> | P-value (Strain) <sup>§</sup> | Q-value (Strain) <sup>§</sup> |
|------------------------|--------------|----------------------------------------|-------------------------|----------------------------------------|----------------------------------------|---------------------------------------|-------------------------------------------|---------------------------------------|---------------------------------------|---------------------------------------|------------------------------------|-----------------------------|-----------------------------|-------------------------------|-------------------------------|
| SpM1_ChORF1725_s_at    | -            | <i>spy1725</i>                         | Unknown                 | Hypothetical cytosolic Protein         | Unknown                                | -                                     | -                                         | -161.24                               | 20.17                                 | 256.87                                | -19.46                             | 5.95E-11                    | <b>7.91E-06</b>             | 0.8243758                     | 0.155423                      |
| SpM1_ChORF1393_s_at    | <i>pepB</i>  | <i>spy1393</i>                         | Amino acid metabolism   | Amino acid catabolism                  | Amino acid catabolism                  | -                                     | -                                         | -164.15                               | -128.14                               | -6.82                                 | 165.68                             | 3.49E-07                    | <b>7.91E-06</b>             | 2.04E-10                      | <b>0.000225</b>               |
| SpM1_ChORF1599_s_at    | -            | <i>spy1599</i>                         | Carbohydrate metabolism | Carbohydrate assimilation              | Carbohydrate assimilation              | -                                     | -                                         | -164.36                               | 522.48                                | 795.57                                | 277.41                             | 3.81E-28                    | <b>7.91E-06</b>             | 3.20E-11                      | <b>0.000225</b>               |
| SpM1_ChORF0097_s_at    | <i>pbp1b</i> | <i>spy0097</i>                         | Cell envelope           | Cell wall                              | Peptidoglycan biosynthesis             | Essential                             | Essential                                 | -164.47                               | -248.74                               | -316.88                               | -66.41                             | 3.33E-11                    | <b>7.91E-06</b>             | 0.031796                      | 0.008283                      |
| SpM18_ChORF1306_at     | -            | <i>spyM18_1306</i>                     | RNA metabolism          | Transcription r egulation              |                                        | -                                     | -                                         | -166.93                               | 151.14                                | 78.45                                 | 222.70                             | 1.14E-10                    | <b>7.91E-06</b>             | 1.50E-11                      | <b>0.000225</b>               |
| SpM1_ChORF0388_s_at    | <i>murE</i>  | <i>spy0388</i>                         | Cell envelope           | Cell wall                              | Peptidoglycan biosynthesis             | -                                     | -                                         | -168.27                               | -417.11                               | -458.10                               | 103.71                             | 5.60E-25                    | <b>7.91E-06</b>             | 2.10E-05                      | <b>0.000225</b>               |
| SpM1_ChORF0587_s_at    | -            | <i>spy0587</i>                         | Unknown                 | Hypothetical protein                   | Unknown                                | Essential                             | -                                         | -169.93                               | -8.76                                 | -96.14                                | -38.96                             | 1.15E-06                    | <b>7.91E-06</b>             | 0.087589                      | 0.02077                       |
| SpM1_ChORF1551_s_at    | -            | <i>spy1551</i>                         | Unknown                 | Hypothetical cytosolic Protein         | Unknown                                | -                                     | -                                         | -170.34                               | -163.71                               | -154.79                               | 8.80                               | 5.34E-19                    | <b>7.91E-06</b>             | 0.7903269                     | 0.149889                      |
| SpM1_ChORF2204_s_at    | <i>recF</i>  | <i>spy2204</i>                         | DNA metabolism          | DNA replication, modification & repair | DNA replication, modification & repair | -                                     | -                                         | -170.66                               | -323.62                               | -379.86                               | 5.28                               | 6.01E-28                    | <b>7.91E-06</b>             | 0.6497512                     | 0.126715                      |
| SpM5_ChORF-b16C31-7_s_ | -            | <i>SpyoM5_Chr ORF_BAC16 C3.00001_7</i> | Unknown                 | Hypothetical protein                   | Unknown                                | -                                     | -                                         | -172.28                               | -5.69                                 | 187.39                                | -184.58                            | 3.05E-15                    | <b>7.91E-06</b>             | 1.37E-11                      | <b>0.000225</b>               |
| SpM1_ChORF1563_s_at    | -            | <i>spy1563</i>                         | Unknown                 | Hypothetical cytosolic Protein         | Unknown                                | -                                     | -                                         | -173.20                               | 145.00                                | 434.33                                | 156.85                             | 1.97E-19                    | <b>7.91E-06</b>             | 2.27E-06                      | <b>0.000225</b>               |
| SpM1_ChORF1576_s_at    | -            | <i>spy1576</i>                         | Amino acid metabolism   | Amino acid biosynthesis                | Amino acid biosynthesis                | -                                     | -                                         | -173.26                               | -285.99                               | -205.96                               | 70.93                              | 1.86E-17                    | <b>7.91E-06</b>             | 7.37E-06                      | <b>0.000225</b>               |
| SpM1_ChORF0752_s_at    | -            | <i>spy0752</i>                         | Cell envelope           | Membrane lipids                        | Phospholipids biosynthesis             | -                                     | -                                         | -174.62                               | -232.22                               | -229.85                               | 22.09                              | 5.30E-27                    | <b>7.91E-06</b>             | 0.0044014                     | 0.001341                      |
| SpM1_ChORF1251_s_at    | <i>truB</i>  | <i>spy1251</i>                         | RNA metabolism          | RNA modification                       | RNA modification                       | -                                     | -                                         | -179.85                               | -198.58                               | -134.21                               | -14.70                             | 1.34E-19                    | <b>7.91E-06</b>             | 0.2199339                     | 0.048007                      |
| SpM1_ChORF0124_s_at    | <i>rofA</i>  | <i>spy0124</i>                         | RNA metabolism          | Transcription r egulation              |                                        | -                                     | -                                         | -179.96                               | -834.12                               | -1499.40                              | 713.72                             | 1.80E-11                    | <b>7.91E-06</b>             | 4.42E-06                      | <b>0.000225</b>               |
| SpM1_ChORF0854_s_at    | <i>fruB</i>  | <i>spy0854</i>                         | Carbohydrate metabolism | Carbohydrate assimilation              | Carbohydrate assimilation              | -                                     | -                                         | -180.08                               | 10.11                                 | -124.98                               | 52.07                              | 0.0002233                   | <b>9.02E-06</b>             | 0.1172358                     | 0.02707                       |
| SpM1_ChORF0852_s_at    | <i>apbA</i>  | <i>spy0852</i>                         | Cofactors               |                                        |                                        | Essential                             | -                                         | -181.55                               | -397.96                               | -472.43                               | -122.67                            | 1.43E-21                    | <b>7.91E-06</b>             | 5.15E-05                      | <b>0.000225</b>               |
| SpM1_ChORF0098_s_at    | <i>rpoB</i>  | <i>spy0098</i>                         | RNA metabolism          | Basic transcription machinery          | Basic transcription machinery          | -                                     | -                                         | -183.13                               | -744.56                               | -938.06                               | -831.76                            | 1.22E-10                    | <b>7.91E-06</b>             | 2.19E-12                      | <b>0.000225</b>               |
| SpM1_ChORF1810_s_at    | <i>pmi</i>   | <i>spy1810</i>                         | Carbohydrate metabolism | Carbohydrate central metabolism        | Carbohydrate central metabolism        | -                                     | -                                         | -183.82                               | -214.98                               | -207.06                               | 28.76                              | 4.66E-20                    | <b>7.91E-06</b>             | 0.0048414                     | 0.001468                      |
| SpM1_ChORF0925_s_at    | -            | <i>spy0925</i>                         | Unknown                 | Hypothetical protein                   | Unknown                                | -                                     | -                                         | -183.97                               | -204.21                               | -127.79                               | 25.68                              | 1.30E-14                    | <b>7.91E-06</b>             | 0.0107346                     | 0.00305                       |
| SpM1_ChORF0654_s_at    | -            | <i>spy0654</i>                         | Phage                   | Phage proteins                         | Hypothetical cytosolic protein         | -                                     | -                                         | -185.14                               | -238.84                               | -329.73                               | -127.30                            | 1.53E-10                    | <b>7.91E-06</b>             | 0.0001464                     | <b>0.00023</b>                |
| SpM1_ChORF0263_s_at    | -            | <i>spy0263</i>                         | Unknown                 | Conserved protein                      | Unknown                                | -                                     | -                                         | -188.41                               | 222.57                                | 99.97                                 | 8.89                               | 2.44E-07                    | <b>7.91E-06</b>             | 0.631113                      | 0.123638                      |
| SpM1_ChORF1936_s_at    | -            | <i>spy1936</i>                         | Unknown                 | Hypothetical cytosolic Protein         | Unknown                                | -                                     | -                                         | -189.50                               | -183.40                               | -23.65                                | -127.13                            | 7.37E-19                    | <b>7.91E-06</b>             | 4.24E-13                      | <b>0.000225</b>               |

| Probe Set Name*       | Gene Name         | Synonym                      | Category                | Subcategory                     | Function                             | <i>Bacillus subtilis</i> <sup>†</sup> | <i>Staphylococcus aureus</i> <sup>†</sup> | Difference Time (30 - 0) <sup>‡</sup> | Difference Time (60 - 0) <sup>‡</sup> | Difference Time (90 - 0) <sup>‡</sup> | Difference (Mut - WT) <sup>‡</sup> | P-value (Time) <sup>§</sup> | Q-value (Time) <sup>§</sup> | P-value (Strain) <sup>§</sup> | Q-value (Strain) <sup>§</sup> |
|-----------------------|-------------------|------------------------------|-------------------------|---------------------------------|--------------------------------------|---------------------------------------|-------------------------------------------|---------------------------------------|---------------------------------------|---------------------------------------|------------------------------------|-----------------------------|-----------------------------|-------------------------------|-------------------------------|
| SpM1_ChORF2096_s_at   | <i>dexS</i>       | <i>spy2096</i>               | Carbohydrate metabolism | Carbohydrate assimilation       | Carbohydrate assimilation            | -                                     | -                                         | -192.66                               | -136.94                               | -8.01                                 | 114.33                             | 4.16E-17                    | <b>7.91E-06</b>             | 1.06E-11                      | <b>0.000225</b>               |
| SpM1_ChORF0772_s_at   | -                 | <i>spy0772</i>               | Membrane transport      | Membrane transport              | Unknown substrate membrane transport | -                                     | -                                         | -194.61                               | -219.64                               | -260.26                               | 6.33                               | 1.86E-25                    | <b>7.91E-06</b>             | 0.8976862                     | 0.166038                      |
| SpM1_ChORF1028_s_at   | <i>acoB, pdhC</i> | <i>spy1028</i>               | Carbohydrate metabolism | Bioenergetics                   | Glycolysis                           | -                                     | -                                         | -195.57                               | 196.19                                | 281.62                                | -92.15                             | 0.0001671                   | <b>8.65E-06</b>             | 0.1012688                     | 0.023694                      |
| SpM1_ChORF1067_s_at   | <i>gabD</i>       | <i>spy1067</i>               | Carbohydrate metabolism | Carbohydrate central metabolism | Carbohydrate central metabolism      | -                                     | -                                         | -196.44                               | -42.86                                | -8.74                                 | -73.85                             | 1.67E-09                    | <b>7.91E-06</b>             | 0.0002646                     | <b>0.000247</b>               |
| SpM1_ChORF0569_s_at   | <i>ftsY</i>       | <i>spy0569</i>               | Protein synthesis       | Protein translocation           | Protein secretion                    | -                                     | -                                         | -196.95                               | 358.89                                | 64.57                                 | -347.71                            | 4.03E-08                    | <b>7.91E-06</b>             | 1.31E-08                      | <b>0.000225</b>               |
| SpM1_ChORF0159_s_at   | -                 | <i>spy0159</i>               | Unknown                 | Hypothetical protein            | Unknown                              | -                                     | -                                         | -200.38                               | -129.50                               | -254.01                               | 103.77                             | 1.38E-08                    | <b>7.91E-06</b>             | 0.0003413                     | <b>0.000259</b>               |
| SpM1_ChORF1869_s_at   | <i>udp</i>        | <i>spy1869</i>               | Nucleotides             | Nucleotides metabolism          | Pyrimidine salvage                   | -                                     | -                                         | -200.49                               | 433.41                                | 714.45                                | 26.29                              | 1.43E-20                    | <b>7.91E-06</b>             | 0.2981609                     | 0.063236                      |
| SpM1_ChORF1145_s_at   | <i>glyA</i>       | <i>spy1145</i>               | Cofactors               | Folate                          | Folate biosynthesis                  | -                                     | -                                         | -200.59                               | -137.34                               | -300.52                               | 37.21                              | 1.89E-09                    | <b>7.91E-06</b>             | 0.110259                      | 0.025526                      |
| SpM1_ChORF1959_s_at   | -                 | <i>spy1959</i>               | Unknown                 | Hypothetical protein            | Unknown                              | -                                     | -                                         | -206.63                               | 51.86                                 | 159.41                                | -182.31                            | 6.80E-20                    | <b>7.91E-06</b>             | 2.54E-12                      | <b>0.000225</b>               |
| SpM1_ChORF1722_s_at   | -                 | <i>spy1722</i>               | Protein synthesis       | Ribosomal proteins              | Ribosomal protein                    | -                                     | -                                         | -208.05                               | 18.32                                 | 287.42                                | -70.69                             | 2.45E-21                    | <b>7.91E-06</b>             | 0.0236849                     | 0.006373                      |
| SpM1_ChORF1395_s_at   | -                 | <i>spy1395</i>               | RNA metabolism          | Basic transcription machinery   | transcription machinery              | -                                     | -                                         | -208.37                               | -164.72                               | 22.18                                 | 106.39                             | 2.83E-10                    | <b>7.91E-06</b>             | 1.07E-05                      | <b>0.000225</b>               |
| SpM1_ChORF0476_s_at   | <i>era</i>        | <i>spy0476</i>               | Other                   | GTP-binding protein             | GTP-binding                          | -                                     | -                                         | -208.79                               | -304.81                               | -344.63                               | 4.15                               | 3.39E-12                    | <b>7.91E-06</b>             | 0.9750304                     | 0.17828                       |
| SpM1_ChORF1867_s_at   | <i>deoC</i>       | <i>spy1867</i>               | Carbohydrate metabolism | Carbohydrate assimilation       | Carbohydrate assimilation            | -                                     | -                                         | -209.18                               | 185.56                                | 387.69                                | -125.91                            | 4.07E-12                    | <b>7.91E-06</b>             | 0.0161053                     | 0.004464                      |
| SpM12_ChORF197-4_s_at | -                 | <i>SpyoM12_Chr ORF_197_4</i> | Unknown                 | Hypothetical protein            | Unknown                              | -                                     | -                                         | -209.62                               | -159.22                               | -58.83                                | 22.07                              | 2.39E-16                    | <b>7.91E-06</b>             | 0.0584285                     | 0.014369                      |
| SpM1_ChORF1979_at     | <i>ska</i>        | <i>spy1979</i>               | Virulence               | Virulence interacting proteins  | Extracellular protein                | -                                     | -                                         | -210.82                               | 926.35                                | 876.91                                | 3190.11                            | 7.48E-11                    | <b>7.91E-06</b>             | 1.97E-37                      | <b>0.000225</b>               |
| SpM1_ChORF1434_s_at   | -                 | <i>spy1434</i>               | Membrane transport      | Membrane transport              | Metal ion membrane transport         | -                                     | -                                         | -217.65                               | -335.88                               | 249.84                                | -1335.14                           | 1.65E-05                    | <b>7.91E-06</b>             | 5.16E-27                      | <b>0.000225</b>               |
| SpM1_ChORF1960_s_at   | -                 | <i>spy1960</i>               | RNA metabolism          | Transcription regulation        |                                      | -                                     | -                                         | -225.22                               | -94.71                                | -68.62                                | -212.86                            | 7.05E-11                    | <b>7.91E-06</b>             | 2.88E-15                      | <b>0.000225</b>               |
| SpM1_ChORF0652_s_at   | -                 | <i>spy0652</i>               | Membrane transport      | Membrane transport              | Unknown substrate membrane transport | -                                     | -                                         | -226.98                               | -216.70                               | -293.26                               | 54.07                              | 1.56E-09                    | <b>7.91E-06</b>             | 0.0304567                     | 0.007994                      |
| SpM1_ChORF0210_s_at   | -                 | <i>spy0210</i>               | Unknown                 | Hypothetical cytosolic protein  | Unknown                              | Essential                             | Essential                                 | -227.05                               | -221.29                               | -33.26                                | -3.97                              | 4.42E-10                    | <b>7.91E-06</b>             | 0.7113485                     | 0.137205                      |
| SpM1_ChORF0267_s_at   | <i>cbf</i>        | <i>spy0267</i>               | Virulence               | Virulence interacting proteins  | Extracellular protein                | Essential                             | Essential                                 | -227.11                               | 178.42                                | 268.19                                | -0.70                              | 4.15E-16                    | <b>7.91E-06</b>             | 0.9419169                     | 0.173307                      |
| SpM1_ChORF1196_s_at   | -                 | <i>spy1196</i>               | Phage                   | Phage proteins                  | Hypothetical cytosolic protein       | -                                     | -                                         | -231.72                               | -67.87                                | 228.32                                | 70.66                              | 6.46E-17                    | <b>7.91E-06</b>             | 0.0033637                     | 0.001046                      |
| SpM1_ChORF1568_s_at   | <i>valS</i>       | <i>spy1568</i>               | Protein synthesis       | tRNA synthetases                | tRNA synthetase                      | -                                     | -                                         | -235.54                               | -235.95                               | -339.08                               | 9.93                               | 1.10E-17                    | <b>7.91E-06</b>             | 0.2187039                     | 0.047857                      |

| Probe Set Name*        | Gene Name   | Synonym                                  | Category                | Subcategory                            | Function                               | <i>Bacillus subtilis</i> † | <i>Staphylococcus aureus</i> † | Difference Time (30 - 0)‡ | Difference Time (60 - 0)‡ | Difference Time (90 - 0)‡ | Difference (Mut - WT)‡ | P-value (Time)§ | Q-value (Time)§ | P-value (Strain)§ | Q-value (Strain)§ |
|------------------------|-------------|------------------------------------------|-------------------------|----------------------------------------|----------------------------------------|----------------------------|--------------------------------|---------------------------|---------------------------|---------------------------|------------------------|-----------------|-----------------|-------------------|-------------------|
| SpM1_ChORF1691_s_at    | -           | <i>spy1691</i>                           | Unknown                 | Hypothetical protein                   | Unknown                                | -                          | -                              | -236.05                   | 12.12                     | 119.21                    | 504.95                 | 0.0003142       | <b>9.67E-06</b> | 6.40E-13          | <b>0.000225</b>   |
| SpM1_ChORF0777_s_at    | <i>rexA</i> | <i>spy0777</i>                           | DNA metabolism          | DNA replication, modification & repair | DNA replication, modification & repair | -                          | -                              | -236.21                   | -201.53                   | -300.79                   | -114.41                | 4.38E-19        | <b>7.91E-06</b> | 1.71E-08          | <b>0.000225</b>   |
| SpM1_ChORF0751_s_at    | <i>lig</i>  | <i>spy0751</i>                           | DNA metabolism          | Basic DNA replication machinery        | DNA replication                        | -                          | -                              | -238.36                   | -440.39                   | -476.13                   | 81.41                  | 3.79E-24        | <b>7.91E-06</b> | 0.0001306         | <b>0.000229</b>   |
| SpM1_ChORF0851_s_at    | -           | <i>spy0851</i>                           | RNA metabolism          | Transcription r egulation              |                                        | -                          | -                              | -241.42                   | -914.31                   | -934.63                   | -210.32                | 9.55E-23        | <b>7.91E-06</b> | 0.0009289         | <b>0.000378</b>   |
| SpM5_ChORFJ7578C-152_  | -           | <i>SpyoM5_Chr ORF_J7578C e05.s1c_152</i> | Unknown                 | Hypothetical protein                   | Unknown                                | -                          | -                              | -245.76                   | -46.23                    | -44.07                    | -103.14                | 3.11E-10        | <b>7.91E-06</b> | 1.10E-05          | <b>0.000225</b>   |
| SpM1_ChORF0059_s_at    | <i>rpmC</i> | <i>spy0059</i>                           | Protein synthesis       | Ribosomal proteins                     | Ribosomal protein                      | Essential                  | Essential                      | -247.85                   | -302.27                   | -528.94                   | -92.83                 | 4.74E-05        | <b>7.97E-06</b> | 0.5845293         | 0.115926          |
| SpM1_ChORF1236_s_at    | <i>ciaH</i> | <i>spy1236</i>                           | RNA metabolism          | Transcription r egulation              | Signal transduction                    | -                          | -                              | -249.59                   | -252.40                   | -261.09                   | 97.28                  | 6.09E-16        | <b>7.91E-06</b> | 2.84E-07          | <b>0.000225</b>   |
| SpM1_ChORF0892_s_at    | <i>punA</i> | <i>spy0892</i>                           | Nucleotides             | Nucleotides metabolism                 | Purine salvage                         | -                          | -                              | -249.70                   | -223.95                   | -273.82                   | -121.08                | 7.99E-13        | <b>7.91E-06</b> | 8.12E-07          | <b>0.000225</b>   |
| SpM1_ChORF2216_s_at    | <i>htrA</i> | <i>spy2216</i>                           | Stress adaptation       | Protein Metabolism                     | Protein Metabolism                     | -                          | -                              | -251.32                   | 273.86                    | 28.86                     | 4.57                   | 4.71E-11        | <b>7.91E-06</b> | 0.5865633         | 0.116263          |
| SpM1_ChORF0395_s_at    | <i>clpP</i> | <i>spy0395</i>                           | Stress adaptation       | Protein Metabolism                     | Protein Metabolism                     | -                          | -                              | -252.43                   | -309.39                   | -71.53                    | 76.85                  | 1.13E-06        | <b>7.91E-06</b> | 0.0075751         | 0.002224          |
| SpM1_ChORF1787_s_at    | -           | <i>spy1787</i>                           | Membrane transport      | Membrane transport                     | Metal ion membrane transport           | -                          | -                              | -252.60                   | -104.61                   | -177.99                   | -406.57                | 0.0004628       | <b>1.09E-05</b> | 7.62E-14          | <b>0.000225</b>   |
| SpM12_ChORF246-9_s_at  | -           | <i>spy0802</i>                           | Unknown                 | Hypothetical protein                   | Unknown                                | Essential                  | Essential                      | -256.38                   | 161.45                    | 499.03                    | 357.05                 | 1.07E-23        | <b>7.91E-06</b> | 5.65E-17          | <b>0.000225</b>   |
| SpM1_ChORF0780_s_at    | <i>mscL</i> | <i>spy0780</i>                           | Membrane transport      | Membrane transport                     | Membrane ion channel                   | -                          | -                              | -256.57                   | -39.20                    | 202.55                    | 467.62                 | 1.45E-17        | <b>7.91E-06</b> | 5.98E-26          | <b>0.000225</b>   |
| SpM1_ChORF1281_s_at    | <i>sipC</i> | <i>spy1281</i>                           | Protein synthesis       | Protein translocation                  | Protein secretion                      | -                          | -                              | -256.82                   | 107.40                    | 217.67                    | 44.58                  | 4.87E-12        | <b>7.91E-06</b> | 0.1096721         | 0.025407          |
| SpM1_ChORF1464_s_at    | -           | <i>spy1464</i>                           | Phage                   | Phage proteins                         |                                        | -                          | -                              | -257.25                   | -242.43                   | -169.75                   | 57.21                  | 3.57E-19        | <b>7.91E-06</b> | 0.0001074         | <b>0.000227</b>   |
| SpM1_ChORF1604_s_at    | -           | <i>spy1604</i>                           | Carbohydrate metabolism | Carbohydrate assimilation              | Carbohydrate assimilation              | -                          | -                              | -258.06                   | 305.14                    | 673.49                    | 138.98                 | 1.78E-25        | <b>7.91E-06</b> | 7.83E-05          | <b>0.000225</b>   |
| SpM1_ChORF0902_s_at    | <i>amiC</i> | <i>spy0902</i>                           | Unknown                 | Hypothetical protein                   | Unknown                                | -                          | -                              | -259.66                   | -418.43                   | -1123.93                  | -150.53                | 2.31E-08        | <b>7.91E-06</b> | 0.7560471         | 0.144165          |
| SpM1_ChORF1689_s_at    | <i>glyQ</i> | <i>spy1689</i>                           | Protein synthesis       | tRNA synthetases                       | tRNA synthetase                        | -                          | -                              | -261.15                   | -432.11                   | -552.95                   | -171.10                | 6.14E-16        | <b>7.91E-06</b> | 2.99E-05          | <b>0.000225</b>   |
| SpM1_ChORF0645_s_at    | <i>ftsX</i> | <i>spy0645</i>                           | Cell shape and division | Cell shape & division                  | Cell division                          | -                          | -                              | -264.07                   | -345.27                   | -260.80                   | 193.04                 | 4.44E-15        | <b>7.91E-06</b> | 1.33E-11          | <b>0.000225</b>   |
| SpM1_ChORF0515_s_at    | -           | <i>spy0515</i>                           | Carbohydrate metabolism | Carbohydrate assimilation              | Carbohydrate assimilation              | -                          | Essential                      | -264.29                   | -409.86                   | -348.95                   | -9.43                  | 3.03E-14        | <b>7.91E-06</b> | 0.7814947         | 0.148293          |
| SpM1_ChORF1284_s_at    | <i>dnaE</i> | <i>spy1284</i>                           | DNA metabolism          | Basic DNA replication machinery        | DNA replication                        | -                          | -                              | -266.50                   | -189.59                   | -265.70                   | -46.31                 | 1.43E-14        | <b>7.91E-06</b> | 0.0084412         | 0.002464          |
| SpM1_ChORF0075_s_at    | <i>infA</i> | <i>spy0075</i>                           | Protein synthesis       | Translation factors                    | Translation factor                     | -                          | -                              | -266.99                   | -2267.67                  | -3091.20                  | 176.93                 | 1.34E-28        | <b>7.91E-06</b> | 0.2419135         | 0.052317          |
| SpM12_ChORF217-10_s_at | <i>crgR</i> | <i>spy1870</i>                           | RNA metabolism          | Transcription r egulation              |                                        | -                          | -                              | -270.60                   | -224.13                   | -90.24                    | 202.47                 | 7.16E-13        | <b>7.91E-06</b> | 1.76E-13          | <b>0.000225</b>   |
| SpM1_ChORF2172_s_at    | -           | <i>spy2172</i>                           | Phage                   | Phage proteins                         | Hypothetical cytosolic protein         | -                          | -                              | -271.26                   | -244.79                   | -269.65                   | -101.76                | 1.33E-29        | <b>7.91E-06</b> | 6.52E-15          | <b>0.000225</b>   |

| Probe Set Name*     | Gene Name         | Synonym        | Category                 | Subcategory                     | Function                             | <i>Bacillus subtilis</i> † | <i>Staphylococcus aureus</i> † | Difference Time (30 - 0)‡ | Difference Time (60 - 0)‡ | Difference Time (90 - 0)‡ | Difference (Mut - WT)‡ | P-value (Time)§ | Q-value (Time)§ | P-value (Strain)§ | Q-value (Strain)§ |
|---------------------|-------------------|----------------|--------------------------|---------------------------------|--------------------------------------|----------------------------|--------------------------------|---------------------------|---------------------------|---------------------------|------------------------|-----------------|-----------------|-------------------|-------------------|
| SpM1_ChORF1723_s_at | -                 | <i>spy1723</i> | Unknown                  | Hypothetical cytosolic Protein  | Unknown                              | -                          | -                              | -271.38                   | -40.33                    | 278.50                    | -59.83                 | 5.47E-14        | <b>7.91E-06</b> | 0.2864474         | 0.060973          |
| SpM1_ChORF0446_s_at | -                 | <i>spy0446</i> | Unknown                  | Hypothetical Cytosolic Protein  | Unknown                              | -                          | -                              | -273.01                   | -241.22                   | -275.58                   | -413.46                | 1.19E-07        | <b>7.91E-06</b> | 6.62E-18          | <b>0.000225</b>   |
| SpM1_ChORF1026_s_at | <i>acoA, pdhB</i> | <i>spy1026</i> | Carbohydrate metabolism  | Bioenergetics                   | Glycolysis                           | -                          | -                              | -277.65                   | -96.32                    | -116.11                   | -95.70                 | 0.0747789       | 0.000905        | 0.1013379         | 0.023695          |
| SpM1_ChORF0898_s_at | <i>cpsY</i>       | <i>spy0898</i> | RNA metabolism           | Transcription regulation        |                                      | Essential                  | Essential                      | -280.15                   | -369.54                   | -359.39                   | 45.54                  | 8.11E-28        | <b>7.91E-06</b> | 0.0007831         | <b>0.000346</b>   |
| SpM1_ChORF2217_s_at | <i>spoJ</i>       | <i>spy2217</i> | DNA metabolism           | Packaging & segregation         | DNA packaging                        | -                          | -                              | -280.35                   | 76.16                     | 252.30                    | -241.19                | 7.28E-14        | <b>7.91E-06</b> | 1.74E-08          | <b>0.000225</b>   |
| SpM1_ChORF0584_s_at | <i>ptsK, hprK</i> | <i>spy0584</i> | RNA metabolism           | Basic transcription machinery   | RNA synthesis regulation             | -                          | -                              | -282.48                   | -131.34                   | -306.72                   | 278.51                 | 1.01E-05        | <b>7.91E-06</b> | 1.47E-08          | <b>0.000225</b>   |
| SpM1_ChORF0352_s_at | -                 | <i>spy0352</i> | Unknown                  | Hypothetical protein            | Unknown                              | -                          | -                              | -282.92                   | -319.52                   | -305.46                   | 48.51                  | 8.17E-30        | <b>7.91E-06</b> | 1.78E-05          | <b>0.000225</b>   |
| SpM1_ChORF1069_s_at | -                 | <i>spy1069</i> | Carbohydrate metabolism  | Carbohydrate central metabolism | Carbohydrate central metabolism      | -                          | -                              | -283.14                   | -248.70                   | -150.24                   | -182.15                | 1.05E-09        | <b>7.91E-06</b> | 8.82E-10          | <b>0.000225</b>   |
| SpM1_ChORF2095_s_at | <i>pepO</i>       | <i>spy2095</i> | Amino acid metabolism    | Amino acid catabolism           | Amino acid catabolism                | -                          | -                              | -285.38                   | -346.06                   | -851.81                   | 46.34                  | 1.92E-22        | <b>7.91E-06</b> | 0.4813875         | 0.097675          |
| SpM1_ChORF0948_s_at | -                 | <i>spy0948</i> | Phage                    | Phage proteins                  | Hypothetical cytosolic protein       | -                          | -                              | -286.82                   | 112.29                    | 592.84                    | 25.93                  | 1.26E-18        | <b>7.91E-06</b> | 0.4700194         | 0.095655          |
| SpM1_ChORF1961_s_at | <i>polC</i>       | <i>spy1961</i> | DNA metabolism           | Basic replication machinery     | DNA replication                      | -                          | -                              | -287.50                   | -216.68                   | -192.87                   | -188.77                | 2.48E-17        | <b>7.91E-06</b> | 8.13E-16          | <b>0.000225</b>   |
| SpM1_ChORF2029_s_at | -                 | <i>spy2029</i> | Membrane transport       | Membrane transport              | Unknown substrate membrane transport | -                          | -                              | -287.90                   | 396.19                    | 597.86                    | -1.42                  | 7.58E-21        | <b>7.91E-06</b> | 0.746109          | 0.142729          |
| SpM1_ChORF1309_s_at | <i>dltD</i>       | <i>spy1309</i> | Cell envelope            | Cell wall                       | Peptidoglycan biosynthesis           | -                          | -                              | -292.03                   | -252.73                   | -96.14                    | -151.43                | 5.45E-17        | <b>7.91E-06</b> | 9.94E-10          | <b>0.000225</b>   |
| SpM1_ChORF0803_s_at | <i>cmk</i>        | <i>spy0803</i> | Nucleotides biosynthesis | Nucleotides biosynthesis        | Pyrimidine biosynthesis              | -                          | -                              | -295.46                   | 65.17                     | 75.10                     | 442.21                 | 2.39E-14        | <b>7.91E-06</b> | 4.61E-22          | <b>0.000225</b>   |
| SpM1_ChORF0769_s_at | <i>pheT</i>       | <i>spy0769</i> | Protein synthesis        | tRNA synthetases                | tRNA synthetase                      | -                          | -                              | -298.52                   | -366.12                   | -388.93                   | -255.80                | 1.74E-14        | <b>7.91E-06</b> | 1.93E-12          | <b>0.000225</b>   |
| SpM1_ChORF1369_s_at | <i>deaD2</i>      | <i>spy1369</i> | RNA metabolism           | Basic transcription machinery   | Basic transcription machinery        | Essential                  | -                              | -301.86                   | -164.96                   | 51.22                     | 164.46                 | 3.31E-10        | <b>7.91E-06</b> | 3.52E-05          | <b>0.000225</b>   |
| SpM1_ChORF0503_s_at | -                 | <i>spy0503</i> | Unknown                  | Hypothetical protein            | Unknown                              | -                          | -                              | -308.51                   | -463.50                   | -274.69                   | 224.38                 | 0.000101        | <b>8.24E-06</b> | 0.0004338         | <b>0.000277</b>   |
| SpM1_ChORF1308_s_at | -                 | <i>spy1308</i> | Unknown                  | Hypothetical protein            | Unknown                              | -                          | -                              | -313.83                   | -257.41                   | -64.42                    | -203.20                | 5.81E-16        | <b>7.91E-06</b> | 1.35E-11          | <b>0.000225</b>   |
| SpM1_ChORF1148_s_at | -                 | <i>spy1148</i> | Membrane transport       | Membrane transport              | Unknown substrate membrane transport | -                          | -                              | -314.76                   | -135.57                   | 3.24                      | 24.33                  | 2.34E-05        | <b>7.91E-06</b> | 0.4214973         | 0.086674          |
| SpM1_ChORF2115_s_at | -                 | <i>spy2115</i> | Unknown                  | Hypothetical cytosolic Protein  | Unknown                              | -                          | -                              | -316.57                   | -253.92                   | -155.84                   | 115.76                 | 3.22E-16        | <b>7.91E-06</b> | 5.44E-08          | <b>0.000225</b>   |
| SpM1_ChORF0936_s_at | <i>cpsFQ</i>      | <i>spy0936</i> | Carbohydrate metabolism  |                                 |                                      | Essential                  | -                              | -319.92                   | -427.55                   | -535.21                   | -107.24                | 6.66E-10        | <b>7.91E-06</b> | 0.029047          | 0.007641          |
| SpM1_ChORF0879_s_at | -                 | <i>spy0879</i> | Cofactors                |                                 |                                      | Essential                  | -                              | -325.19                   | -363.19                   | -227.97                   | -87.42                 | 2.59E-11        | <b>7.91E-06</b> | 0.0260147         | 0.006926          |

| Probe Set Name*       | Gene Name    | Synonym                              | Category                | Subcategory                            | Function                               | <i>Bacillus subtilis</i> <sup>†</sup> | <i>Staphylococcus aureus</i> <sup>†</sup> | Difference Time (30 - 0) <sup>‡</sup> | Difference Time (60 - 0) <sup>‡</sup> | Difference Time (90 - 0) <sup>‡</sup> | Difference (Mut - WT) <sup>‡</sup> | P-value (Time) <sup>§</sup> | Q-value (Time) <sup>§</sup> | P-value (Strain) <sup>§</sup> | Q-value (Strain) <sup>§</sup> |
|-----------------------|--------------|--------------------------------------|-------------------------|----------------------------------------|----------------------------------------|---------------------------------------|-------------------------------------------|---------------------------------------|---------------------------------------|---------------------------------------|------------------------------------|-----------------------------|-----------------------------|-------------------------------|-------------------------------|
| SpM1_ChORF0278_s_at   | -            | <i>spy0278</i>                       | Unknown                 | Hypothetical protein                   | Unknown                                | -                                     | -                                         | -325.88                               | -206.55                               | -230.08                               | 75.87                              | 6.61E-12                    | <b>7.91E-06</b>             | 0.0153897                     | 0.004279                      |
| SpM1_ChORF0924_s_at   | <i>elaC</i>  | <i>spy0924</i>                       | Unknown                 | Conserved protein                      | Unknown                                | -                                     | -                                         | -327.89                               | -449.90                               | -319.92                               | 95.12                              | 1.22E-13                    | <b>7.91E-06</b>             | 0.0004625                     | <b>0.000282</b>               |
| SpM1_ChORF0910_s_at   | <i>parC</i>  | <i>spy0910</i>                       | DNA metabolism          | Packaging & segregation                | DNA packaging                          | -                                     | -                                         | -328.55                               | -443.51                               | -356.98                               | -116.80                            | 6.55E-20                    | <b>7.91E-06</b>             | 0.0003701                     | <b>0.000265</b>               |
| SpM1_ChORF1389_s_at   | <i>alaS</i>  | <i>spy1389</i>                       | Protein synthesis       | tRNA synthetases                       | tRNA synthetase                        | Essential                             | -                                         | -331.55                               | -470.87                               | -606.57                               | -210.41                            | 3.22E-20                    | <b>7.91E-06</b>             | 4.32E-08                      | <b>0.000225</b>               |
| SpM1_ChORF1519_s_at   | -            | <i>spy1519</i>                       | Unknown                 | Hypothetical protein                   | Unknown                                | -                                     | -                                         | -331.59                               | -339.99                               | -950.46                               | -224.71                            | 6.75E-19                    | <b>7.91E-06</b>             | 1.60E-05                      | <b>0.000225</b>               |
| SpM1_ChORF0781_s_at   | <i>dnaG</i>  | <i>spy0781</i>                       | DNA metabolism          | Basic replication machinery            | DNA replication                        | -                                     | -                                         | -332.36                               | -404.51                               | -202.15                               | -27.08                             | 5.46E-07                    | <b>7.91E-06</b>             | 0.7145878                     | 0.137679                      |
| SpM1_ChORF1825_at     | <i>uvrA</i>  | <i>spy1825</i>                       | DNA metabolism          | DNA replication, modification & repair | DNA replication, modification & repair | -                                     | -                                         | -332.77                               | -204.74                               | -170.65                               | 87.88                              | 2.18E-17                    | <b>7.91E-06</b>             | 2.28E-06                      | <b>0.000225</b>               |
| SpM1_ChORF0080a_s_at  | <i>rpIQ</i>  | <i>spy0080a</i>                      | Protein synthesis       | Ribosomal proteins                     | Ribosomal protein                      | -                                     | -                                         | -337.39                               | -1524.24                              | -1899.45                              | 54.16                              | 1.20E-32                    | <b>7.91E-06</b>             | 0.4202456                     | 0.086518                      |
| SpM1_ChORF2080_s_at   | <i>ahpF</i>  | <i>spy2080</i>                       | Stress adaptation       | Oxidative stress                       | Oxidative stress                       | -                                     | -                                         | -338.64                               | 1490.74                               | 2609.64                               | -324.15                            | 9.31E-23                    | <b>7.91E-06</b>             | 0.0145514                     | 0.004062                      |
| SpM1_ChORF1629_s_at   | <i>priA</i>  | <i>spy1629</i>                       | DNA metabolism          | Basic replication machinery            | DNA replication                        | -                                     | -                                         | -339.25                               | -21.88                                | -1.08                                 | -73.30                             | 1.44E-09                    | <b>7.91E-06</b>             | 0.0790262                     | 0.01888                       |
| SpM1_ChORF0593_s_at   | -            | <i>spy0593</i>                       | Unknown                 | Hypothetical protein                   | Unknown                                | Essential                             | Essential                                 | -341.67                               | 751.40                                | 438.47                                | 335.52                             | 9.08E-18                    | <b>7.91E-06</b>             | 5.88E-07                      | <b>0.000225</b>               |
| SpM1_ChORF1029_s_at   | <i>acoC</i>  | <i>spy1029</i>                       | Other                   | Unknown                                | Unknown                                | -                                     | -                                         | -342.00                               | 171.21                                | 204.33                                | -231.22                            | 0.0001236                   | <b>8.37E-06</b>             | 0.0021992                     | 0.00072                       |
| SpM1_ChORF1832_s_at   | -            | <i>spy1832</i>                       | Unknown                 | Hypothetical protein                   | Unknown                                | -                                     | -                                         | -343.45                               | -204.27                               | -234.05                               | 442.43                             | 0.0002684                   | <b>9.33E-06</b>             | 2.57E-11                      | <b>0.000225</b>               |
| SpM49_ChORF391-1_s_at | -            | <i>SpyoM49_Chr ORF_sp001_0_391_1</i> | Unknown                 | Hypothetical protein                   | Unknown                                | -                                     | -                                         | -344.65                               | -411.56                               | -486.20                               | 40.50                              | 2.57E-18                    | <b>7.91E-06</b>             | 0.1359684                     | 0.030818                      |
| SpM1_ChORF0933_s_at   | <i>cpsFO</i> | <i>spy0933</i>                       | Carbohydrate metabolism |                                        |                                        | Essential                             | Essential                                 | -347.07                               | -348.90                               | -489.07                               | -6.29                              | 1.02E-12                    | <b>7.91E-06</b>             | 0.5672387                     | 0.112943                      |
| SpM1_ChORF1831_s_at   | <i>rpsF</i>  | <i>spy1831</i>                       | Protein synthesis       | Ribosomal proteins                     | Ribosomal protein                      | -                                     | -                                         | -347.77                               | -2424.73                              | -2902.01                              | 8.00                               | 2.19E-13                    | <b>7.91E-06</b>             | 0.8174561                     | 0.15445                       |
| SpM1_ChORF0853_s_at   | <i>fruR</i>  | <i>spy0853</i>                       | RNA metabolism          | Transcription r egulation              |                                        | Essential                             | -                                         | -349.76                               | -213.10                               | -358.67                               | 65.68                              | 1.76E-10                    | <b>7.91E-06</b>             | 0.0322641                     | 0.008393                      |
| SpM18_ChORF1719_s_at  | <i>trxB</i>  | <i>spyM18_1719</i>                   | Membrane transport      | Membrane transport                     | Carbohydrate membrane transport        | -                                     | -                                         | -351.32                               | -225.89                               | 52.34                                 | 244.66                             | 2.49E-15                    | <b>7.91E-06</b>             | 5.91E-11                      | <b>0.000225</b>               |
| SpM1_ChORF0406_s_at   | -            | <i>spy0406</i>                       | Unknown                 | Hypothetical Cytosolic Protein         | Unknown                                | -                                     | -                                         | -351.82                               | -135.33                               | 12.20                                 | 15.63                              | 3.15E-12                    | <b>7.91E-06</b>             | 0.62505                       | 0.122853                      |
| SpM1_ChORF1518_s_at   | -            | <i>spy1518</i>                       | Unknown                 | Hypothetical protein                   | Unknown                                | -                                     | -                                         | -351.98                               | -464.90                               | -1455.21                              | -262.45                            | 1.29E-18                    | <b>7.91E-06</b>             | 0.0019504                     | 0.000648                      |
| SpM1_ChORF2173_s_at   | -            | <i>spy2173</i>                       | Phage                   | Phage proteins                         | Hypothetical cytosolic protein         | -                                     | -                                         | -352.60                               | -322.99                               | -355.97                               | -120.73                            | 3.60E-38                    | <b>7.91E-06</b>             | 6.38E-19                      | <b>0.000225</b>               |
| SpM1_ChORF1192_s_at   | <i>citC</i>  | <i>spy1192</i>                       | Carbohydrate metabolism | Carbohydrate central metabolism        | Carbohydrate central metabolism        | -                                     | -                                         | -357.35                               | -66.06                                | 273.26                                | 166.41                             | 1.45E-14                    | <b>7.91E-06</b>             | 9.29E-05                      | <b>0.000226</b>               |
| SpM1_ChORF1577_s_at   | <i>aroB</i>  | <i>spy1577</i>                       | Amino acid metabolism   | Amino acid biosynthesis                | Amino acid biosynthesis                | -                                     | -                                         | -358.06                               | -399.38                               | -305.95                               | 31.75                              | 1.49E-29                    | <b>7.91E-06</b>             | 0.0006494                     | <b>0.000316</b>               |

| Probe Set Name*     | Gene Name         | Synonym        | Category                | Subcategory                        | Function                             | <i>Bacillus subtilis</i> <sup>†</sup> | <i>Staphylococcus aureus</i> <sup>†</sup> | Difference Time (30 - 0) <sup>‡</sup> | Difference Time (60 - 0) <sup>‡</sup> | Difference Time (90 - 0) <sup>‡</sup> | Difference (Mut - WT) <sup>‡</sup> | P-value (Time) <sup>§</sup> | Q-value (Time) <sup>§</sup> | P-value (Strain) <sup>§</sup> | Q-value (Strain) <sup>§</sup> |
|---------------------|-------------------|----------------|-------------------------|------------------------------------|--------------------------------------|---------------------------------------|-------------------------------------------|---------------------------------------|---------------------------------------|---------------------------------------|------------------------------------|-----------------------------|-----------------------------|-------------------------------|-------------------------------|
| SpM1_ChORF1146_s_at | -                 | <i>spy1146</i> | Unknown                 | Hypothetical Cytosolic Protein     | Unknown                              | -                                     | -                                         | -359.98                               | -246.56                               | -415.37                               | 14.68                              | 2.54E-13                    | <b>7.91E-06</b>             | 0.2684623                     | 0.057423                      |
| SpM1_ChORF1801_s_at | <i>isp2</i>       | <i>spy1801</i> | Virulence               | Virulence interacting proteins     | Extracellular protein                | -                                     | -                                         | -364.46                               | 317.97                                | 761.90                                | 1800.55                            | 2.27E-09                    | <b>7.91E-06</b>             | 3.33E-25                      | <b>0.000225</b>               |
| SpM1_ChORF1390_s_at | <i>surA, prsA</i> | <i>spy1390</i> | Protein synthesis       | Protein translocation              | Protein secretion                    | -                                     | -                                         | -366.82                               | -1155.87                              | -1359.50                              | 49.71                              | 8.55E-16                    | <b>7.91E-06</b>             | 0.3666549                     | 0.076562                      |
| SpM1_ChORF0078_s_at | <i>tpsK</i>       | <i>spy0078</i> | Protein synthesis       | Ribosomal proteins                 | Ribosomal protein                    | -                                     | -                                         | -370.03                               | -1887.27                              | -2454.35                              | 155.54                             | 1.11E-31                    | <b>7.91E-06</b>             | 0.1014944                     | 0.023715                      |
| SpM1_ChORF0450_s_at | <i>scaR</i>       | <i>spy0450</i> | RNA metabolism          | Transcription r egulation          |                                      | -                                     | -                                         | -370.09                               | -248.48                               | -360.77                               | -32.98                             | 1.33E-12                    | <b>7.91E-06</b>             | 0.2309863                     | 0.050108                      |
| SpM1_ChORF0800_s_at | -                 | <i>spy0800</i> | Virulence               | Virulence interacting proteins     | Lantibiotic, Quorum sensing          | Essential                             | Essential                                 | -377.37                               | 53.54                                 | 299.02                                | 397.21                             | 1.27E-25                    | <b>7.91E-06</b>             | 4.13E-22                      | <b>0.000225</b>               |
| SpM1_ChORF1711_s_at | <i>gatA</i>       | <i>spy1711</i> | Membrane transport      | Membrane transport                 | Carbohydrate membrane transport      | -                                     | -                                         | -381.89                               | -259.80                               | -89.03                                | 231.55                             | 5.89E-18                    | <b>7.91E-06</b>             | 4.08E-13                      | <b>0.000225</b>               |
| SpM1_ChORF1057_s_at | -                 | <i>spy1057</i> | Unknown                 | Hypothetical protein               | Unknown                              | -                                     | -                                         | -383.52                               | -291.18                               | -16.67                                | 218.30                             | 1.69E-16                    | <b>7.91E-06</b>             | 1.21E-09                      | <b>0.000225</b>               |
| SpM1_ChORF0756_s_at | <i>atpF</i>       | <i>spy0756</i> | Carbohydrate metabolism | Bioenergetics                      | Bioenergetics                        | Essential                             | -                                         | -387.99                               | -804.19                               | -945.55                               | -307.91                            | 6.05E-34                    | <b>7.91E-06</b>             | 2.76E-16                      | <b>0.000225</b>               |
| SpM1_ChORF1687_s_at | -                 | <i>spy1687</i> | Unknown                 | Hypothetical cytosolic Protein     | Unknown                              | -                                     | -                                         | -388.08                               | -214.29                               | -348.33                               | -191.49                            | 7.03E-12                    | <b>7.91E-06</b>             | 2.77E-06                      | <b>0.000225</b>               |
| SpM1_ChORF0183_s_at | <i>opuAA</i>      | <i>spy0183</i> | Membrane transport      | Membrane transport                 | Osmoprotectant membrane transport    | -                                     | -                                         | -390.43                               | -258.69                               | 410.31                                | 95.25                              | 3.05E-18                    | <b>7.91E-06</b>             | 0.0054658                     | 0.001637                      |
| SpM1_ChORF0187_s_at | <i>perR</i>       | <i>spy0187</i> | RNA metabolism          | Transcription r egulation          |                                      | -                                     | -                                         | -390.80                               | 51.06                                 | -5.74                                 | 145.05                             | 8.27E-08                    | <b>7.91E-06</b>             | 0.0090794                     | 0.002622                      |
| SpM1_ChORF0894_s_at | <i>deoD2</i>      | <i>spy0894</i> | Nucleotides             | Nucleotides metabolism             | Purine salvage                       | -                                     | -                                         | -391.87                               | -554.44                               | -692.93                               | -285.43                            | 3.26E-11                    | <b>7.91E-06</b>             | 2.20E-05                      | <b>0.000225</b>               |
| SpM1_ChORF1311_s_at | <i>dltB</i>       | <i>spy1311</i> | Unknown                 | Hypothetical membrane protein      | Unknown                              | -                                     | -                                         | -392.08                               | -367.28                               | -314.01                               | -87.99                             | 7.29E-29                    | <b>7.91E-06</b>             | 2.73E-07                      | <b>0.000225</b>               |
| SpM1_ChORF0903_s_at | -                 | <i>spy0903</i> | Membrane transport      | Membrane transport                 | Unknown substrate membrane transport | -                                     | -                                         | -392.40                               | -369.77                               | -983.37                               | -22.54                             | 2.95E-10                    | <b>7.91E-06</b>             | 0.621686                      | 0.122328                      |
| SpM1_ChORF2097_s_at | -                 | <i>spy2097</i> | Membrane transport      | Membrane transport                 | Carbohydrate membrane transport      | -                                     | -                                         | -399.43                               | -352.43                               | -203.75                               | 107.36                             | 2.49E-24                    | <b>7.91E-06</b>             | 2.67E-08                      | <b>0.000225</b>               |
| SpM1_ChORF0516_s_at | -                 | <i>spy0516</i> | Cell envelope           | Cell wall                          | Fatty acid biosynthesis              | Essential                             | Essential                                 | -406.77                               | -407.76                               | -290.53                               | -2.07                              | 2.87E-18                    | <b>7.91E-06</b>             | 0.7236795                     | 0.13905                       |
| SpM1_ChORF0357_s_at | -                 | <i>spy0357</i> | Unknown                 | Hypothetical Cytosolic Protein     | Unknown                              | -                                     | -                                         | -406.92                               | -801.78                               | -649.70                               | -76.01                             | 5.09E-22                    | <b>7.91E-06</b>             | 0.1158855                     | 0.026775                      |
| SpM1_ChORF0266_s_at | -                 | <i>spy0266</i> | Unknown                 | Hypothetical extracellular protein | Unknown                              | Essential                             | -                                         | -411.85                               | 242.35                                | 391.41                                | 19.67                              | 1.11E-16                    | <b>7.91E-06</b>             | 0.5321039                     | 0.106794                      |
| SpM1_ChORF2000_s_at | <i>dppA</i>       | <i>spy2000</i> | Membrane transport      | Membrane transport                 | Peptide membrane transport           | -                                     | -                                         | -414.37                               | -486.05                               | -498.17                               | -955.08                            | 3.60E-21                    | <b>7.91E-06</b>             | 3.08E-45                      | <b>0.000225</b>               |
| SpM1_ChORF1798_s_at | -                 | <i>spy1798</i> | Unknown                 | Hypothetical protein               | Unknown                              | -                                     | -                                         | -414.50                               | -453.40                               | -419.12                               | -433.83                            | 5.73E-18                    | <b>7.91E-06</b>             | 1.38E-22                      | <b>0.000225</b>               |

| Probe Set Name*       | Gene Name     | Synonym        | Category                | Subcategory                     | Function                             | <i>Bacillus subtilis</i> <sup>†</sup> | <i>Staphylococcus aureus</i> <sup>†</sup> | Difference Time (30 - 0) <sup>‡</sup> | Difference Time (60 - 0) <sup>‡</sup> | Difference Time (90 - 0) <sup>‡</sup> | Difference (Mut - WT) <sup>‡</sup> | P-value (Time) <sup>§</sup> | Q-value (Time) <sup>§</sup> | P-value (Strain) <sup>§</sup> | Q-value (Strain) <sup>§</sup> |
|-----------------------|---------------|----------------|-------------------------|---------------------------------|--------------------------------------|---------------------------------------|-------------------------------------------|---------------------------------------|---------------------------------------|---------------------------------------|------------------------------------|-----------------------------|-----------------------------|-------------------------------|-------------------------------|
| SpM1_ChORF2027_s_at   | <i>irr</i>    | <i>spy2027</i> | RNA metabolism          | Transcription regulation        | Signal transduction                  | -                                     | -                                         | -414.97                               | 452.26                                | 631.78                                | 36.73                              | 1.89E-18                    | <b>7.91E-06</b>             | 0.9129705                     | 0.168334                      |
| SpM1_ChORF1962_s_at   | <i>proS</i>   | <i>spy1962</i> | Protein synthesis       | tRNA synthetases                | tRNA synthetase                      | -                                     | -                                         | -421.80                               | -255.23                               | -301.50                               | -218.20                            | 3.57E-07                    | <b>7.91E-06</b>             | 6.46E-06                      | <b>0.000225</b>               |
| SpM1_ChORF0224_s_at   | <i>hasC.2</i> | <i>spy0224</i> | Carbohydrate metabolism | Carbohydrate biosynthesis       |                                      | -                                     | -                                         | -427.79                               | -206.46                               | -127.00                               | -160.29                            | 2.65E-09                    | <b>7.91E-06</b>             | 0.0003736                     | <b>0.000265</b>               |
| SpM1_ChORF1678_s_at   | -             | <i>spy1678</i> | Carbohydrate metabolism | Carbohydrate central metabolism | Carbohydrate central metabolism      | -                                     | -                                         | -429.33                               | 2493.32                               | 2727.86                               | 444.51                             | 1.77E-25                    | <b>7.91E-06</b>             | 0.0042178                     | 0.001293                      |
| SpM1_ChORF0182_s_at   | -             | <i>spy0182</i> | Unknown                 | Hypothetical cytosolic protein  | Unknown                              | -                                     | -                                         | -431.41                               | 3525.64                               | 4360.66                               | 951.48                             | 4.01E-26                    | <b>7.91E-06</b>             | 2.22E-05                      | <b>0.000225</b>               |
| SpM1_ChORF0330_s_at   | <i>lemA</i>   | <i>spy0330</i> | Unknown                 | Hypothetical membrane protein   | Unknown                              | -                                     | -                                         | -432.70                               | -730.70                               | -1027.98                              | 189.81                             | 5.23E-15                    | <b>7.91E-06</b>             | 0.0407473                     | 0.01032                       |
| SpM1_ChORF0379_s_at   | <i>pflC</i>   | <i>spy0379</i> | Carbohydrate metabolism | Carbohydrate assimilation       | Carbohydrate assimilation            | -                                     | -                                         | -437.69                               | -294.71                               | -250.01                               | 185.01                             | 1.60E-21                    | <b>7.91E-06</b>             | 3.75E-13                      | <b>0.000225</b>               |
| SpM1_ChORF0935_s_at   | <i>cpsFP</i>  | <i>spy0935</i> | Carbohydrate metabolism |                                 |                                      | -                                     | -                                         | -438.62                               | -537.07                               | -733.94                               | -202.97                            | 1.02E-17                    | <b>7.91E-06</b>             | 3.78E-06                      | <b>0.000225</b>               |
| SpM1_ChORF0773_s_at   | -             | <i>spy0773</i> | Membrane transport      | Membrane transport              | Unknown substrate membrane transport | -                                     | -                                         | -440.81                               | -452.00                               | -468.05                               | -3.39                              | 8.50E-15                    | <b>7.91E-06</b>             | 0.8540659                     | 0.159396                      |
| SpM1_ChORF0158_s_at   | -             | <i>spy0158</i> | Unknown                 | Hypothetical protein            | Unknown                              | -                                     | -                                         | -440.95                               | -181.83                               | -338.86                               | 28.74                              | 4.00E-16                    | <b>7.91E-06</b>             | 0.6589206                     | 0.12829                       |
| SpM1_ChORF0757_s_at   | <i>atpH</i>   | <i>spy0757</i> | Carbohydrate metabolism | Bioenergetics                   | Bioenergetics                        | Essential                             | -                                         | -442.41                               | -743.48                               | -891.03                               | -315.17                            | 8.70E-29                    | <b>7.91E-06</b>             | 8.57E-15                      | <b>0.000225</b>               |
| SpM1_ChORF0339_s_at   | <i>dnaB</i>   | <i>spy0339</i> | DNA metabolism          | Basic replication machinery     | DNA replication                      | -                                     | -                                         | -446.21                               | -97.75                                | -214.49                               | 454.22                             | 0.0021379                   | <b>2.91E-05</b>             | 8.22E-07                      | <b>0.000225</b>               |
| SpM1_ChORF1644_s_at   | -             | <i>spy1644</i> | Unknown                 | Hypothetical protein            | Unknown                              | -                                     | -                                         | -446.25                               | -206.01                               | 266.91                                | 10.24                              | 2.60E-17                    | <b>7.91E-06</b>             | 0.6262437                     | 0.12295                       |
| SpM1_ChORF0439_s_at   | -             | <i>spy0439</i> | Unknown                 | Hypothetical Cytosolic Protein  | Unknown                              | -                                     | -                                         | -448.76                               | -427.53                               | -540.67                               | 32.06                              | 4.52E-21                    | <b>7.91E-06</b>             | 0.3985728                     | 0.082443                      |
| SpM1_ChORF0532_s_at   | <i>smc</i>    | <i>spy0532</i> | DNA metabolism          | Packaging & segregation         | DNA packaging                        | -                                     | -                                         | -451.03                               | -597.43                               | -660.55                               | -86.86                             | 6.51E-41                    | <b>7.91E-06</b>             | 9.02E-08                      | <b>0.000225</b>               |
| SpM1_ChORF1310_s_at   | <i>dltC</i>   | <i>spy1310</i> | Cell envelope           | Cell wall                       | Peptidoglycan biosynthesis           | -                                     | -                                         | -453.49                               | -380.11                               | -227.91                               | -158.01                            | 3.15E-18                    | <b>7.91E-06</b>             | 6.54E-07                      | <b>0.000225</b>               |
| SpM1_ChORF0504_s_at   | -             | <i>spy0504</i> | Unknown                 | Hypothetical protein            | Unknown                              | -                                     | -                                         | -457.66                               | -353.49                               | -75.01                                | 163.71                             | 3.79E-11                    | <b>7.91E-06</b>             | 2.48E-05                      | <b>0.000225</b>               |
| SpM1_ChORF0799_s_at   | <i>pepT</i>   | <i>spy0799</i> | Amino acid metabolism   | Amino acid catabolism           | Amino acid catabolism                | -                                     | -                                         | -465.98                               | 70.57                                 | 304.18                                | 539.66                             | 1.92E-22                    | <b>7.91E-06</b>             | 1.71E-22                      | <b>0.000225</b>               |
| SpM1_ChORF1156_s_at   | -             | <i>spy1156</i> | Unknown                 | Hypothetical protein            | Unknown                              | -                                     | -                                         | -467.34                               | -68.79                                | 689.43                                | 125.68                             | 8.64E-23                    | <b>7.91E-06</b>             | 0.003145                      | 0.000985                      |
| SpM1_ChORF0886_s_at   | -             | <i>spy0886</i> | Other                   | GTP-binding protein             | GTP-binding                          | Essential                             | -                                         | -468.78                               | -856.80                               | -1099.55                              | -184.23                            | 8.07E-21                    | <b>7.91E-06</b>             | 0.0069955                     | 0.002062                      |
| SpM1_ChORF0127_at     | -             | <i>spy0127</i> | Protein synthesis       | Protein translocation           | Protein secretion                    | -                                     | -                                         | -469.02                               | -859.94                               | -1073.09                              | 34.67                              | 1.21E-27                    | <b>7.91E-06</b>             | 0.2049334                     | 0.045097                      |
| SpM12_ChORF273-5_s_at | -             | <i>spy0331</i> | Unknown                 | Hypothetical protein            | Unknown                              | -                                     | -                                         | -470.82                               | -460.95                               | -678.64                               | -0.03                              | 1.11E-16                    | <b>7.91E-06</b>             | 0.4407298                     | 0.09047                       |
| SpM1_ChORF0588_s_at   | -             | <i>spy0588</i> | Unknown                 | Hypothetical Cytosolic Protein  | Unknown                              | -                                     | -                                         | -477.74                               | 26.25                                 | -64.81                                | 38.39                              | 4.84E-11                    | <b>7.91E-06</b>             | 0.5292682                     | 0.106327                      |

| Probe Set Name*     | Gene Name        | Synonym        | Category                | Subcategory                            | Function                               | <i>Bacillus subtilis</i> <sup>†</sup> | <i>Staphylococcus aureus</i> <sup>†</sup> | Difference Time (30 - 0) <sup>‡</sup> | Difference Time (60 - 0) <sup>‡</sup> | Difference Time (90 - 0) <sup>‡</sup> | Difference (Mut - WT) <sup>‡</sup> | P-value (Time) <sup>§</sup> | Q-value (Time) <sup>§</sup> | P-value (Strain) <sup>§</sup> | Q-value (Strain) <sup>§</sup> |
|---------------------|------------------|----------------|-------------------------|----------------------------------------|----------------------------------------|---------------------------------------|-------------------------------------------|---------------------------------------|---------------------------------------|---------------------------------------|------------------------------------|-----------------------------|-----------------------------|-------------------------------|-------------------------------|
| SpM1_ChORF0926_s_at | <i>recJ</i>      | <i>spy0926</i> | DNA metabolism          | DNA replication, modification & repair | DNA replication, modification & repair | -                                     | -                                         | -480.24                               | -449.03                               | -346.11                               | 159.35                             | 7.21E-24                    | <b>7.91E-06</b>             | 7.70E-11                      | <b>0.000225</b>               |
| SpM1_ChORF1415_s_at | <i>deaD</i>      | <i>spy1415</i> | RNA metabolism          | Basic transcription machinery          | Basic transcription machinery          | -                                     | -                                         | -493.58                               | -634.95                               | -370.88                               | 37.09                              | 2.42E-06                    | <b>7.91E-06</b>             | 0.2166431                     | 0.047584                      |
| SpM1_ChORF0885_s_at | <i>clpX</i>      | <i>spy0885</i> | Stress adaptation       | Protein Metabolism                     | Protein Metabolism                     | -                                     | -                                         | -495.09                               | -828.74                               | -1049.75                              | -144.33                            | 2.32E-20                    | <b>7.91E-06</b>             | 0.0204515                     | 0.005576                      |
| SpM1_ChORF1981_s_at | <i>relA</i>      | <i>spy1981</i> | Stress adaptation       | Phosphorus metabolism                  | PpGpp metabolism                       | -                                     | -                                         | -495.36                               | -454.72                               | -675.67                               | -761.40                            | 3.14E-09                    | <b>7.91E-06</b>             | 5.46E-18                      | <b>0.000225</b>               |
| SpM1_ChORF1753_s_at | <i>acpP</i>      | <i>spy1753</i> | Cell envelope           | Membrane lipids                        | Fatty acid biosynthesis                | -                                     | -                                         | -498.67                               | -550.40                               | -560.67                               | -124.78                            | 2.91E-32                    | <b>7.91E-06</b>             | 4.36E-11                      | <b>0.000225</b>               |
| SpM1_ChORF0130_at   | -                | <i>spy0130</i> | Unknown                 | Hypothetical protein                   | Unknown                                | -                                     | -                                         | -501.52                               | -471.77                               | -805.64                               | 71.49                              | 5.07E-19                    | <b>7.91E-06</b>             | 0.036017                      | 0.009266                      |
| SpM1_ChORF1068_s_at | <i>uvrC</i>      | <i>spy1068</i> | DNA metabolism          | DNA replication, modification & repair | DNA replication, modification & repair | -                                     | -                                         | -501.79                               | -214.53                               | -39.64                                | -114.43                            | 2.00E-16                    | <b>7.91E-06</b>             | 0.001166                      | <b>0.000437</b>               |
| SpM1_ChORF2072_s_at | <i>groES</i>     | <i>spy2072</i> | Protein synthesis       | Protein folding & modification         | Protein folding                        | -                                     | -                                         | -517.28                               | -198.14                               | 326.36                                | 403.31                             | 9.20E-11                    | <b>7.91E-06</b>             | 2.97E-07                      | <b>0.000225</b>               |
| SpM1_ChORF0184_s_at | <i>opuABC</i>    | <i>spy0184</i> | Membrane transport      | Membrane transport                     | Osmoprotectant membrane transport      | -                                     | -                                         | -519.88                               | -444.71                               | 255.19                                | -60.58                             | 1.27E-11                    | <b>7.91E-06</b>             | 0.9477319                     | 0.174195                      |
| SpM1_ChORF1626_s_at | <i>pppL/stp1</i> | <i>spy1626</i> | RNA metabolism          | Transcription regulation               | Hypothetical cytosolic protein         | -                                     | -                                         | -526.65                               | -271.38                               | 13.78                                 | -66.30                             | 5.57E-16                    | <b>7.91E-06</b>             | 0.1692298                     | 0.03776                       |
| SpM1_ChORF1643_s_at | -                | <i>spy1643</i> | Unknown                 | Hypothetical cytosolic protein         | Unknown                                | -                                     | -                                         | -542.05                               | -793.42                               | -565.45                               | -92.13                             | 2.42E-11                    | <b>7.91E-06</b>             | 0.1567893                     | 0.035118                      |
| SpM1_ChORF1922_s_at | <i>lacB.2</i>    | <i>spy1922</i> | Carbohydrate metabolism | Carbohydrate assimilation              | Carbohydrate assimilation              | -                                     | -                                         | -542.35                               | -537.81                               | -391.49                               | 5.83                               | 1.47E-22                    | <b>7.91E-06</b>             | 0.5107256                     | 0.103151                      |
| SpM1_ChORF1463_s_at | -                | <i>spy1463</i> | Phage                   | Phage proteins                         |                                        | -                                     | -                                         | -543.01                               | -436.23                               | -267.54                               | 154.05                             | 1.62E-20                    | <b>7.91E-06</b>             | 1.87E-07                      | <b>0.000225</b>               |
| SpM1_ChORF1386_s_at | -                | <i>spy1386</i> | RNA metabolism          | Transcription regulation               |                                        | -                                     | -                                         | -561.27                               | 343.47                                | 777.13                                | 461.55                             | 1.41E-18                    | <b>7.91E-06</b>             | 1.74E-09                      | <b>0.000225</b>               |
| SpM1_ChORF0380_s_at | <i>ppaC</i>      | <i>spy0380</i> | Other                   | Regulation                             | Inorganic pyrophosphatase              | -                                     | -                                         | -565.08                               | -514.25                               | -651.34                               | 155.85                             | 1.38E-17                    | <b>7.91E-06</b>             | 0.0002013                     | <b>0.000237</b>               |
| SpM1_ChORF0273_s_at | <i>fus</i>       | <i>spy0273</i> | Protein synthesis       | Translation factors                    | Translation factor                     | Essential                             | -                                         | -568.79                               | -632.95                               | -442.59                               | 27.13                              | 2.94E-11                    | <b>7.91E-06</b>             | 0.1420004                     | 0.032092                      |
| SpM1_ChORF0186_s_at | -                | <i>spy0186</i> | Unknown                 | Hypothetical cytosolic protein         | Unknown                                | -                                     | -                                         | -570.25                               | -192.96                               | -271.00                               | 391.91                             | 2.29E-09                    | <b>7.91E-06</b>             | 1.88E-10                      | <b>0.000225</b>               |
| SpM1_ChORF1917_s_at | <i>lacE</i>      | <i>spy1917</i> | Membrane transport      | Membrane transport                     | Carbohydrate membrane transport        | -                                     | -                                         | -573.69                               | -496.23                               | -211.70                               | 83.19                              | 1.02E-20                    | <b>7.91E-06</b>             | 0.0032312                     | 0.00101                       |
| SpM1_ChORF1921_s_at | <i>lacC.2</i>    | <i>spy1921</i> | Carbohydrate metabolism | Carbohydrate assimilation              | Carbohydrate assimilation              | -                                     | -                                         | -575.13                               | -519.22                               | -374.37                               | 73.79                              | 5.95E-28                    | <b>7.91E-06</b>             | 0.000175                      | <b>0.000233</b>               |
| SpM1_ChORF0867_s_at | -                | <i>spy0867</i> | Membrane transport      | Membrane transport                     | Unknown substrate membrane transport   | -                                     | -                                         | -590.76                               | -380.17                               | -22.70                                | 42.50                              | 2.48E-15                    | <b>7.91E-06</b>             | 0.0648109                     | 0.015806                      |
| SpM1_ChORF1316_s_at | <i>glnQ.2</i>    | <i>spy1316</i> | Membrane transport      | Membrane transport                     | Unknown substrate membrane transport   | -                                     | -                                         | -591.18                               | -671.77                               | -631.28                               | -74.79                             | 5.75E-15                    | <b>7.91E-06</b>             | 0.1239968                     | 0.028425                      |



| Probe Set Name*      | Gene Name        | Synonym            | Category                | Subcategory                    | Function                        | <i>Bacillus subtilis</i> <sup>†</sup> | <i>Staphylococcus aureus</i> <sup>†</sup> | Difference Time (30 - 0) <sup>‡</sup> | Difference Time (60 - 0) <sup>‡</sup> | Difference Time (90 - 0) <sup>‡</sup> | Difference (Mut - WT) <sup>‡</sup> | P-value (Time) <sup>§</sup> | Q-value (Time) <sup>§</sup> | P-value (Strain) <sup>§</sup> | Q-value (Strain) <sup>§</sup> |
|----------------------|------------------|--------------------|-------------------------|--------------------------------|---------------------------------|---------------------------------------|-------------------------------------------|---------------------------------------|---------------------------------------|---------------------------------------|------------------------------------|-----------------------------|-----------------------------|-------------------------------|-------------------------------|
| SpM1_ChORF1724_s_at  | <i>nusA</i>      | <i>spy1724</i>     | RNA metabolism          | Basic transcription machinery  | Basic transcription machinery   | -                                     | -                                         | -601.22                               | -115.52                               | 350.04                                | -94.39                             | 2.54E-17                    | <b>7.91E-06</b>             | 0.2620024                     | 0.056178                      |
| SpM1_ChORF0500_s_at  | -                | <i>spy0500</i>     | Unknown                 | Hypothetical Cytosolic Protein | Unknown                         | -                                     | -                                         | -604.68                               | -319.04                               | -330.86                               | 73.28                              | 9.89E-16                    | <b>7.91E-06</b>             | 0.0205498                     | 0.005598                      |
| SpM1_ChORF1301_at    | <i>malC</i>      | <i>spy1301</i>     | Membrane transport      | Membrane transport             | Carbohydrate membrane transport | -                                     | -                                         | -607.72                               | 995.91                                | 3690.00                               | 969.88                             | 1.22E-27                    | <b>7.91E-06</b>             | 6.09E-09                      | <b>0.000225</b>               |
| SpM1_ChORF2059_s_at  | <i>pbp2A</i>     | <i>spy2059</i>     | Cell envelope           | Cell wall                      | Peptidoglycan biosynthesis      | -                                     | -                                         | -620.47                               | -678.44                               | -767.42                               | 172.12                             | 1.93E-29                    | <b>7.91E-06</b>             | 5.39E-10                      | <b>0.000225</b>               |
| SpM1_ChORF0044_s_at  | <i>adhA</i>      | <i>spy0044</i>     | Carbohydrate metabolism | Bioenergetics                  |                                 | -                                     | -                                         | -630.37                               | 148.35                                | 319.95                                | 242.18                             | 4.24E-16                    | <b>7.91E-06</b>             | 0.0003841                     | <b>0.000267</b>               |
| SpM18_ChORF0043_s_at | <i>purK</i>      | <i>spyM18_0043</i> | Nucleotides             | Nucleotides biosynthesis       | Purine biosynthesis             | -                                     | -                                         | -641.39                               | -877.73                               | -782.33                               | -162.99                            | 2.00E-14                    | <b>7.91E-06</b>             | 0.0193786                     | 0.005308                      |
| SpM1_ChORF1780_s_at  | -                | <i>spy1780</i>     | RNA metabolism          | Transcription regulation       |                                 | -                                     | -                                         | -643.96                               | 551.12                                | 428.55                                | 167.93                             | 3.09E-12                    | <b>7.91E-06</b>             | 0.1791957                     | 0.039782                      |
| SpM1_ChORF1399_s_at  | <i>nagB</i>      | <i>spy1399</i>     | Carbohydrate metabolism | Carbohydrate assimilation      | Carbohydrate assimilation       | -                                     | -                                         | -650.64                               | -247.66                               | 277.40                                | 571.16                             | 1.53E-16                    | <b>7.91E-06</b>             | 3.13E-14                      | <b>0.000225</b>               |
| SpM1_ChORF1937_s_at  | -                | <i>spy1937</i>     | Unknown                 | Hypothetical cytosolic Protein | Unknown                         | -                                     | -                                         | -650.98                               | -947.32                               | -1066.50                              | -5.97                              | 4.91E-37                    | <b>7.91E-06</b>             | 0.8159134                     | 0.154242                      |
| SpM1_ChORF1806_s_at  | -                | <i>spy1806</i>     | Unknown                 | Hypothetical protein           | Unknown                         | -                                     | -                                         | -656.22                               | -479.92                               | -199.85                               | 24.75                              | 6.05E-24                    | <b>7.91E-06</b>             | 0.1268722                     | 0.029047                      |
| SpM1_ChORF0128_at    | -                | <i>spy0128</i>     | Unknown                 | Hypothetical protein           | Unknown                         | -                                     | -                                         | -664.11                               | -962.80                               | -1282.19                              | 62.27                              | 3.77E-25                    | <b>7.91E-06</b>             | 0.1055606                     | 0.024532                      |
| SpM1_ChORF2073_s_at  | <i>clpC</i>      | <i>spy2073</i>     | Stress adaptation       | Protein Metabolism             | Protein Metabolism              | -                                     | -                                         | -665.72                               | -251.03                               | 21.67                                 | -63.28                             | 7.87E-14                    | <b>7.91E-06</b>             | 0.230711                      | 0.050106                      |
| SpM1_ChORF1128_s_at  | <i>pta</i>       | <i>spy1128</i>     | DNA metabolism          | Basic replication machinery    | DNA replication                 | -                                     | -                                         | -680.34                               | -488.07                               | -400.64                               | 9.62                               | 3.82E-21                    | <b>7.91E-06</b>             | 0.9639243                     | 0.176801                      |
| SpM1_ChORF2026_s_at  | <i>ihk</i>       | <i>spy2026</i>     | RNA metabolism          | Transcription regulation       | Signal transduction             | -                                     | -                                         | -685.14                               | 512.91                                | 804.38                                | 26.51                              | 5.44E-22                    | <b>7.91E-06</b>             | 0.9488663                     | 0.174312                      |
| SpM1_ChORF2174_s_at  | -                | <i>spy2174</i>     | Phage                   | Phage proteins                 |                                 | -                                     | -                                         | -692.72                               | -591.40                               | -662.78                               | -258.51                            | 1.04E-35                    | <b>7.91E-06</b>             | 7.08E-20                      | <b>0.000225</b>               |
| SpM1_ChORF1304_at    | <i>amyB</i>      | <i>spy1304</i>     | Carbohydrate metabolism | Carbohydrate assimilation      | Carbohydrate assimilation       | -                                     | -                                         | -693.00                               | 1197.77                               | 2260.56                               | 815.95                             | 3.77E-24                    | <b>7.91E-06</b>             | 1.89E-08                      | <b>0.000225</b>               |
| SpM1_ChORF1282_s_at  | <i>pyk, pykA</i> | <i>spy1282</i>     | Carbohydrate metabolism | Bioenergetics                  | Glycolysis                      | -                                     | -                                         | -698.68                               | -1506.21                              | -1509.01                              | -164.15                            | 4.85E-30                    | <b>7.91E-06</b>             | 0.0046023                     | 0.001398                      |
| SpM1_ChORF1681_s_at  | <i>npx/nox.2</i> | <i>spy1681</i>     | Stress adaptation       | Oxidative stress               | Oxidative stress                | -                                     | -                                         | -700.94                               | 1164.11                               | 699.17                                | 251.60                             | 7.58E-15                    | <b>7.91E-06</b>             | 0.0777791                     | 0.018594                      |
| SpM1_ChORF0644_s_at  | <i>ftsE</i>      | <i>spy0644</i>     | Cell shape and division | Cell shape & division          | Cell division                   | -                                     | -                                         | -703.79                               | -876.93                               | -881.55                               | 436.44                             | 8.58E-19                    | <b>7.91E-06</b>             | 3.79E-11                      | <b>0.000225</b>               |
| SpM1_ChORF0340_s_at  | <i>dnal</i>      | <i>spy0340</i>     | DNA metabolism          | Basic replication machinery    | DNA replication                 | -                                     | -                                         | -707.69                               | 168.38                                | 284.69                                | 498.10                             | 1.16E-15                    | <b>7.91E-06</b>             | 2.87E-10                      | <b>0.000225</b>               |
| SpM1_ChORF1694_s_at  | <i>nagA</i>      | <i>spy1694</i>     | Carbohydrate metabolism | Carbohydrate assimilation      | Carbohydrate assimilation       | -                                     | -                                         | -720.63                               | -255.75                               | 341.18                                | 411.70                             | 5.00E-27                    | <b>7.91E-06</b>             | 9.33E-15                      | <b>0.000225</b>               |
| SpM1_ChORF1710_s_at  | -                | <i>spy1710</i>     | Membrane transport      | Membrane transport             | Carbohydrate membrane transport | -                                     | -                                         | -729.63                               | -410.22                               | -80.22                                | 502.16                             | 1.53E-20                    | <b>7.91E-06</b>             | 7.54E-17                      | <b>0.000225</b>               |
| SpM1_ChORF0782_s_at  | <i>rpoD</i>      | <i>spy0782</i>     | RNA metabolism          | Basic transcription machinery  | Basic transcription machinery   | -                                     | -                                         | -735.41                               | -911.97                               | -773.42                               | -392.75                            | 3.43E-12                    | <b>7.91E-06</b>             | 7.91E-06                      | <b>0.000225</b>               |
| SpM1_ChORF0430_at    | -                | <i>spy0430</i>     | Unknown                 | Hypothetical protein           | Unknown                         | -                                     | -                                         | -740.85                               | 157.72                                | -172.17                               | 652.82                             | 5.77E-10                    | <b>7.91E-06</b>             | 1.74E-09                      | <b>0.000225</b>               |

| Probe Set Name*      | Gene Name       | Synonym            | Category                | Subcategory                            | Function                               | <i>Bacillus subtilis</i> <sup>†</sup> | <i>Staphylococcus aureus</i> <sup>†</sup> | Difference Time (30 - 0) <sup>‡</sup> | Difference Time (60 - 0) <sup>‡</sup> | Difference Time (90 - 0) <sup>‡</sup> | Difference (Mut - WT) <sup>‡</sup> | P-value (Time) <sup>§</sup> | Q-value (Time) <sup>§</sup> | P-value (Strain) <sup>§</sup> | Q-value (Strain) <sup>§</sup> |
|----------------------|-----------------|--------------------|-------------------------|----------------------------------------|----------------------------------------|---------------------------------------|-------------------------------------------|---------------------------------------|---------------------------------------|---------------------------------------|------------------------------------|-----------------------------|-----------------------------|-------------------------------|-------------------------------|
| SpM1_ChORF1100_s_at  | <i>folK</i>     | <i>spy1100</i>     | Cofactors               | Folate                                 | Folate biosynthesis                    | -                                     | -                                         | -741.16                               | -685.40                               | -742.74                               | 190.37                             | 2.26E-27                    | <b>7.91E-06</b>             | 1.64E-08                      | <b>0.000225</b>               |
| SpM1_ChORF0758_s_at  | <i>atpA</i>     | <i>spy0758</i>     | Carbohydrate metabolism | Bioenergetics                          | Bioenergetics                          | Essential                             | -                                         | -763.16                               | -2111.40                              | -2601.91                              | -1070.20                           | 4.03E-30                    | <b>7.91E-06</b>             | 2.69E-17                      | <b>0.000225</b>               |
| SpM1_ChORF1719_s_at  | <i>rbfA</i>     | <i>spy1719</i>     | Protein synthesis       | Translation factors                    | Translation factor                     | -                                     | -                                         | -774.08                               | -39.31                                | 550.94                                | 31.88                              | 1.07E-17                    | <b>7.91E-06</b>             | 0.3643522                     | 0.076126                      |
| SpM1_ChORF1688_at    | <i>glyS</i>     | <i>spy1688</i>     | Protein synthesis       | tRNA synthetases                       | tRNA synthetase                        | -                                     | -                                         | -774.78                               | -688.37                               | -925.94                               | -344.32                            | 1.37E-15                    | <b>7.91E-06</b>             | 1.65E-06                      | <b>0.000225</b>               |
| SpM1_ChORF0129_at    | <i>eftLSL.B</i> | <i>spy0129</i>     | Unknown                 | Hypothetical protein                   | Unknown                                | -                                     | -                                         | -780.95                               | -1021.43                              | -1446.56                              | 157.03                             | 8.92E-25                    | <b>7.91E-06</b>             | 0.0019807                     | 0.000657                      |
| SpM1_ChORF1923_s_at  | <i>lacA.2</i>   | <i>spy1923</i>     | Carbohydrate metabolism | Carbohydrate assimilation              | Carbohydrate assimilation              | -                                     | -                                         | -781.96                               | -713.12                               | -529.06                               | 46.92                              | 4.41E-27                    | <b>7.91E-06</b>             | 0.0387711                     | 0.009895                      |
| SpM1_ChORF2077_x_at  | <i>csp</i>      | <i>spy2077</i>     | Stress adaptation       | Cold shock proteins                    | Cold shock proteins                    | -                                     | -                                         | -784.96                               | -1001.16                              | -1049.77                              | 57.51                              | 6.92E-26                    | <b>7.91E-06</b>             | 0.0642656                     | 0.015695                      |
| SpM1_ChORF1211_s_at  | -               | <i>spy1211</i>     | Nucleotides             | Nucleotides biosynthesis               | Purine biosynthesis                    | -                                     | -                                         | -787.65                               | -883.24                               | -517.41                               | 108.50                             | 3.35E-16                    | <b>7.91E-06</b>             | 0.0355908                     | 0.009163                      |
| SpM1_ChORF1314_s_at  | <i>uvrB</i>     | <i>spy1314</i>     | DNA metabolism          | DNA replication, modification & repair | DNA replication, modification & repair | -                                     | -                                         | -793.96                               | -826.97                               | -778.73                               | 72.24                              | 8.43E-39                    | <b>7.91E-06</b>             | 5.38E-05                      | <b>0.000225</b>               |
| SpM1_ChORF0832_s_at  | <i>pyrB</i>     | <i>spy0832</i>     | Nucleotides             | Nucleotides biosynthesis               | Pyrimidine biosynthesis                | -                                     | -                                         | -806.30                               | -1031.25                              | -1976.20                              | 343.16                             | 2.90E-07                    | <b>7.91E-06</b>             | 0.0338946                     | 0.008758                      |
| SpM1_ChORF0833_s_at  | <i>carA</i>     | <i>spy0833</i>     | Nucleotides             | Nucleotides biosynthesis               | Pyrimidine biosynthesis                | -                                     | -                                         | -806.31                               | -1405.15                              | -2249.45                              | 321.05                             | 1.05E-08                    | <b>7.91E-06</b>             | 0.0470142                     | 0.01176                       |
| SpM1_ChORF0890_s_at  | <i>deoB</i>     | <i>spy0890</i>     | Carbohydrate metabolism | Carbohydrate assimilation              | Carbohydrate assimilation              | -                                     | -                                         | -830.36                               | -982.35                               | -1189.37                              | -209.17                            | 4.69E-18                    | <b>7.91E-06</b>             | 0.0024975                     | 0.000804                      |
| SpM1_ChORF0341_s_at  | <i>pgdA</i>     | <i>spy0341</i>     | Other                   | GTP-binding protein                    | GTP-binding                            | -                                     | -                                         | -832.10                               | -30.67                                | 167.35                                | 810.41                             | 1.47E-11                    | <b>7.91E-06</b>             | 6.71E-14                      | <b>0.000225</b>               |
| SpM1_ChORF1651_s_at  | <i>pepC</i>     | <i>spy1651</i>     | Amino acid metabolism   | Amino acid catabolism                  | Amino acid catabolism                  | -                                     | -                                         | -840.32                               | -948.16                               | -1202.19                              | -227.07                            | 1.44E-21                    | <b>7.91E-06</b>             | 1.04E-05                      | <b>0.000225</b>               |
| SpM1_ChORF0818_s_at  | <i>capA</i>     | <i>spy0818</i>     | Unknown                 | Hypothetical protein                   | Unknown                                | -                                     | -                                         | -845.60                               | -581.32                               | -238.80                               | 16.79                              | 3.98E-22                    | <b>7.91E-06</b>             | 0.4112069                     | 0.084806                      |
| SpM1_ChORF1099_s_at  | <i>folQ</i>     | <i>spy1099</i>     | Cofactors               | Folate                                 | Folate biosynthesis                    | Essential                             | -                                         | -850.15                               | -766.09                               | -848.31                               | 195.84                             | 9.07E-29                    | <b>7.91E-06</b>             | 1.88E-08                      | <b>0.000225</b>               |
| SpM1_ChORF2013_s_at  | <i>tnp</i>      | <i>spy2013</i>     | Mobile Genetic Element  | Mobile Genetic Element                 | Transposase                            | -                                     | -                                         | -865.47                               | -784.65                               | -728.77                               | 99.29                              | 2.06E-38                    | <b>7.91E-06</b>             | 3.77E-07                      | <b>0.000225</b>               |
| SpM1_ChORF1938_s_at  | -               | <i>spy1938</i>     | RNA metabolism          | RNA modification                       | RNA modification                       | -                                     | -                                         | -883.18                               | -1138.28                              | -1414.34                              | 114.15                             | 5.98E-31                    | <b>7.91E-06</b>             | 0.0207806                     | 0.005652                      |
| SpM18_ChORF0084_s_at | -               | <i>spyM18_0084</i> | Unknown                 | Hypothetical protein                   | Unknown                                | -                                     | -                                         | -889.93                               | -34.70                                | 1148.78                               | 85.17                              | 1.33E-10                    | <b>7.91E-06</b>             | 0.2872695                     | 0.061111                      |
| SpM1_ChORF1721_s_at  | <i>infB</i>     | <i>spy1721</i>     | Protein synthesis       | Translation factors                    | Translation factor                     | -                                     | -                                         | -892.09                               | -217.38                               | 415.31                                | -30.89                             | 1.20E-21                    | <b>7.91E-06</b>             | 0.6776228                     | 0.131567                      |
| SpM1_ChORF0080_s_at  | <i>rpoA</i>     | <i>spy0080</i>     | RNA metabolism          | Basic transcription machinery          | Basic transcription machinery          | -                                     | -                                         | -893.84                               | -2311.69                              | -2941.69                              | 228.60                             | 4.08E-32                    | <b>7.91E-06</b>             | 0.0273849                     | 0.007252                      |
| SpM1_ChORF0470_s_at  | -               | <i>spy0470</i>     | Virulence               | Virulence interacting proteins         | Cell surface protein                   | -                                     | -                                         | -907.71                               | -550.21                               | -344.65                               | 412.01                             | 3.14E-30                    | <b>7.91E-06</b>             | 2.07E-20                      | <b>0.000225</b>               |
| SpM1_ChORF0317_s_at  | -               | <i>spy0317</i>     | Membrane transport      | Membrane transport                     | Unknown substrate membrane transport   | -                                     | -                                         | -917.65                               | -1108.61                              | -1158.04                              | 391.41                             | 1.13E-26                    | <b>7.91E-06</b>             | 3.02E-12                      | <b>0.000225</b>               |
| SpM1_ChORF1096_s_at  | <i>folC.1</i>   | <i>spy1096</i>     | Cofactors               | Folate                                 | Folate biosynthesis                    | -                                     | -                                         | -918.94                               | -1021.47                              | -1037.05                              | 510.40                             | 1.90E-22                    | <b>7.91E-06</b>             | 4.10E-15                      | <b>0.000225</b>               |

| Probe Set Name*       | Gene Name    | Synonym                            | Category                | Subcategory                     | Function                             | <i>Bacillus subtilis</i> † | <i>Staphylococcus aureus</i> † | Difference Time (30 - 0)‡ | Difference Time (60 - 0)‡ | Difference Time (90 - 0)‡ | Difference (Mut - WT)‡ | P-value (Time)§ | Q-value (Time)§ | P-value (Strain)§ | Q-value (Strain)§ |
|-----------------------|--------------|------------------------------------|-------------------------|---------------------------------|--------------------------------------|----------------------------|--------------------------------|---------------------------|---------------------------|---------------------------|------------------------|-----------------|-----------------|-------------------|-------------------|
| SpM12_ChORF251-6_at   | -            | <i>SpyoM12_ChORF_251_6</i>         | Unknown                 | Hypothetical protein            | Unknown                              | Essential                  | Essential                      | -936.51                   | -513.15                   | -527.27                   | 638.56                 | 6.39E-10        | <b>7.91E-06</b> | 8.82E-11          | <b>0.000225</b>   |
| SpM1_ChORF0441_s_at   | -            | <i>spy0441</i>                     | Unknown                 | Hypothetical protein            | Unknown                              | -                          | -                              | -949.05                   | -870.17                   | -911.50                   | -49.48                 | 6.83E-40        | <b>7.91E-06</b> | 0.0393446         | 0.010012          |
| SpM1_ChORF1070_s_at   | -            | <i>spy1070</i>                     | Amino acid metabolism   | Amino acid catabolism           | Amino acid catabolism                | -                          | -                              | -951.56                   | -882.91                   | -1007.75                  | -481.34                | 1.76E-19        | <b>7.91E-06</b> | 2.40E-13          | <b>0.000225</b>   |
| SpM1_ChORF0888_s_at   | <i>clpL</i>  | <i>spy0888</i>                     | Stress adaptation       | Metabolism                      | Metabolism                           | Essential                  | -                              | -953.01                   | 503.78                    | 1568.03                   | 923.66                 | 6.26E-26        | <b>7.91E-06</b> | 4.61E-14          | <b>0.000225</b>   |
| SpM1_ChORF0511_s_at   | <i>gloA</i>  | <i>spy0511</i>                     | Carbohydrate metabolism | Carbohydrate assimilation       | Carbohydrate assimilation            | -                          | -                              | -953.59                   | -418.76                   | -449.30                   | 117.63                 | 1.86E-22        | <b>7.91E-06</b> | 0.0036297         | 0.001118          |
| SpM1_ChORF1339_s_at   | -            | <i>spy1339</i>                     | Unknown                 | Hypothetical protein            | Unknown                              | -                          | -                              | -953.84                   | -547.19                   | -576.27                   | 364.25                 | 2.49E-20        | <b>7.91E-06</b> | 2.56E-10          | <b>0.000225</b>   |
| SpM1_ChORF1503_s_at   | -            | <i>spy1503</i>                     | Carbohydrate metabolism | Carbohydrate central metabolism | Carbohydrate central metabolism      | -                          | -                              | -986.53                   | -533.60                   | -527.00                   | 14.81                  | 4.06E-14        | <b>7.91E-06</b> | 0.736952          | 0.141137          |
| SpM1_ChORF1627_s_at   | <i>sunL</i>  | <i>spy1627</i>                     | RNA metabolism          | RNA modification                | RNA modification                     | -                          | -                              | -990.47                   | -604.91                   | -399.98                   | -149.03                | 1.75E-21        | <b>7.91E-06</b> | 0.0106595         | 0.003033          |
| SpM3_ChORF0158_s_at   | -            | <i>SpyM3_0158</i>                  | Unknown                 | Hypothetical protein            | Unknown                              | -                          | -                              | -992.31                   | -807.00                   | -342.66                   | -68.78                 | 4.47E-16        | <b>7.91E-06</b> | 0.6316055         | 0.123657          |
| SpM1_ChORF1306_at     | <i>malX</i>  | <i>spy1306</i>                     | Membrane transport      | Membrane transport              | Carbohydrate membrane transport      | -                          | -                              | -995.38                   | 1713.38                   | 1731.48                   | 813.47                 | 7.40E-22        | <b>7.91E-06</b> | 2.30E-06          | <b>0.000225</b>   |
| SpM1_ChORF2070_s_at   | <i>groEL</i> | <i>spy2070</i>                     | Protein synthesis       | Protein folding & modification  | Protein folding                      | -                          | -                              | -1007.84                  | -712.55                   | -389.30                   | 455.88                 | 1.18E-05        | <b>7.91E-06</b> | 0.0013402         | <b>0.000482</b>   |
| SpM49_ChORF356-2_s_at | -            | <i>SpyoM49_ChORF_sp001_0_356_2</i> | Unknown                 | Hypothetical protein            | Unknown                              | -                          | -                              | -1071.19                  | -831.37                   | -262.40                   | 342.17                 | 1.62E-19        | <b>7.91E-06</b> | 1.09E-06          | <b>0.000225</b>   |
| SpM1_ChORF1097_s_at   | <i>folE</i>  | <i>spy1097</i>                     | Cofactors               | Folate                          | Folate biosynthesis                  | -                          | -                              | -1077.01                  | -1045.76                  | -1244.19                  | 247.43                 | 1.45E-29        | <b>7.91E-06</b> | 3.44E-07          | <b>0.000225</b>   |
| SpM1_ChORF1436_s_at   | <i>mf3</i>   | <i>spy1436</i>                     | Phage                   | Phage proteins                  |                                      | -                          | -                              | -1092.80                  | -112.95                   | 335.33                    | 1710.10                | 4.16E-22        | <b>7.91E-06</b> | 4.08E-32          | <b>0.000225</b>   |
| SpM1_ChORF2025_s_at   | <i>isp</i>   | <i>spy2025</i>                     | Virulence               | Virulence interacting proteins  | Extracellular protein                | -                          | -                              | -1094.79                  | 845.29                    | 984.89                    | 206.62                 | 3.63E-23        | <b>7.91E-06</b> | 0.2019638         | 0.044555          |
| SpM1_ChORF0919_at     | -            | <i>spy0919</i>                     | Unknown                 | Hypothetical protein            | Unknown                              | -                          | -                              | -1120.75                  | -890.61                   | -1304.03                  | 228.16                 | 4.79E-20        | <b>7.91E-06</b> | 0.0015789         | <b>0.000546</b>   |
| SpM1_ChORF0577_at     | -            | <i>spy0577</i>                     | Unknown                 | Hypothetical Cytosolic Protein  | Unknown                              | -                          | -                              | -1132.76                  | -1163.95                  | -1517.77                  | -322.66                | 5.77E-22        | <b>7.91E-06</b> | 5.91E-06          | <b>0.000225</b>   |
| SpM1_ChORF0760_s_at   | <i>atpD</i>  | <i>spy0760</i>                     | Carbohydrate metabolism | Bioenergetics                   | Bioenergetics                        | -                          | -                              | -1141.26                  | -1145.90                  | -1264.92                  | -457.20                | 3.69E-25        | <b>7.91E-06</b> | 2.89E-12          | <b>0.000225</b>   |
| SpM1_ChORF0583_s_at   | -            | <i>spy0583</i>                     | Stress adaptation       | Stress proteins                 | Stress proteins                      | -                          | -                              | -1143.75                  | -1175.02                  | -1254.95                  | -38.00                 | 1.66E-32        | <b>7.91E-06</b> | 0.6303693         | 0.123622          |
| SpM1_ChORF1398_s_at   | -            | <i>spy1398</i>                     | RNA metabolism          | RNA modification                | RNA modification                     | -                          | -                              | -1156.28                  | -522.00                   | 176.84                    | 994.24                 | 3.77E-19        | <b>7.91E-06</b> | 5.93E-19          | <b>0.000225</b>   |
| SpM1_ChORF1686_s_at   | -            | <i>spy1686</i>                     | Unknown                 | Hypothetical protein            | Unknown                              | -                          | -                              | -1183.08                  | -372.62                   | 323.09                    | 3.54                   | 1.58E-21        | <b>7.91E-06</b> | 0.6525566         | 0.127192          |
| SpM1_ChORF1315_s_at   | <i>glnH</i>  | <i>spy1315</i>                     | Membrane transport      | Membrane transport              | Unknown substrate membrane transport | -                          | -                              | -1199.52                  | -1510.54                  | -1515.89                  | -9.82                  | 4.02E-15        | <b>7.91E-06</b> | 0.8429251         | 0.157736          |
| SpM1_ChORF1693_s_at   | -            | <i>spy1693</i>                     | Carbohydrate metabolism | Carbohydrate assimilation       | Carbohydrate assimilation            | -                          | -                              | -1199.82                  | 340.03                    | 652.44                    | 708.38                 | 5.06E-30        | <b>7.91E-06</b> | 2.76E-15          | <b>0.000225</b>   |
| SpM1_ChORF1511_s_at   | -            | <i>spy1511</i>                     | Unknown                 | Hypothetical cytosolic Protein  | Unknown                              | -                          | -                              | -1227.27                  | -619.01                   | -246.56                   | 348.30                 | 8.50E-19        | <b>7.91E-06</b> | 3.01E-06          | <b>0.000225</b>   |

| Probe Set Name*        | Gene Name     | Synonym                       | Category                | Subcategory                     | Function                             | <i>Bacillus subtilis</i> † | <i>Staphylococcus aureus</i> † | Difference Time (30 - 0)‡ | Difference Time (60 - 0)‡ | Difference Time (90 - 0)‡ | Difference (Mut - WT)‡ | P-value (Time)§ | Q-value (Time)§ | P-value (Strain)§ | Q-value (Strain)§ |
|------------------------|---------------|-------------------------------|-------------------------|---------------------------------|--------------------------------------|----------------------------|--------------------------------|---------------------------|---------------------------|---------------------------|------------------------|-----------------|-----------------|-------------------|-------------------|
| SpM1_ChORF2032_s_at    | -             | <i>spy2032</i>                | Membrane transport      | Membrane transport              | Unknown substrate membrane transport | -                          | -                              | -1230.51                  | 1102.70                   | 757.15                    | -153.28                | 8.67E-15        | <b>7.91E-06</b> | 0.1194927         | 0.027518          |
| SpM1_ChORF1406_s_at    | <i>sodA</i>   | <i>spy1406</i>                | Stress adaptation       | Oxidative stress                | Oxidative stress                     | -                          | -                              | -1234.64                  | -465.29                   | -742.79                   | -126.23                | 9.45E-09        | <b>7.91E-06</b> | 0.1297711         | 0.029618          |
| SpM1_ChORF1371_s_at    | <i>gapN</i>   | <i>spy1371</i>                | Carbohydrate metabolism | Carbohydrate central metabolism | Carbohydrate central metabolism      | -                          | -                              | -1244.60                  | -1990.42                  | -2219.65                  | -490.44                | 2.18E-26        | <b>7.91E-06</b> | 7.05E-08          | <b>0.000225</b>   |
| SpM1_ChORF1302_at      | <i>amyA</i>   | <i>spy1302</i>                | Carbohydrate metabolism | Carbohydrate assimilation       | Carbohydrate assimilation            | -                          | -                              | -1324.87                  | 1420.15                   | 3529.25                   | 1335.64                | 3.12E-30        | <b>7.91E-06</b> | 3.60E-12          | <b>0.000225</b>   |
| SpM3_ChORF1092_s_at    | <i>holA</i>   | <i>SpyM3_1092</i>             | Unknown                 | Hypothetical protein            | Unknown                              | -                          | -                              | -1355.07                  | -932.35                   | -503.33                   | -1849.51               | 1.35E-10        | <b>7.91E-06</b> | 9.15E-23          | <b>0.000225</b>   |
| SpM1_ChORF1312_s_at    | <i>dltA</i>   | <i>spy1312</i>                | Cell envelope           | Cell wall                       | Peptidoglycan biosynthesis           | -                          | -                              | -1359.24                  | -1325.25                  | -1260.59                  | -116.52                | 5.53E-43        | <b>7.91E-06</b> | 0.0026783         | 0.000852          |
| SpM1_ChORF0759_s_at    | <i>atpG</i>   | <i>spy0759</i>                | Carbohydrate metabolism | Bioenergetics                   | Bioenergetics                        | -                          | -                              | -1359.42                  | -2061.44                  | -2249.75                  | -937.81                | 2.38E-24        | <b>7.91E-06</b> | 3.06E-14          | <b>0.000225</b>   |
| SpM18_ChORF1214_s_at   | -             | <i>spyM18_1214</i>            | Unknown                 | Hypothetical protein            | Unknown                              | -                          | -                              | -1379.49                  | -149.55                   | 1229.94                   | 622.30                 | 7.02E-23        | <b>7.91E-06</b> | 5.60E-07          | <b>0.000225</b>   |
| SpM1_ChORF1060_s_at    | <i>ptsD</i>   | <i>spy1060</i>                | Membrane transport      | Membrane transport              | Carbohydrate membrane transport      | -                          | -                              | -1390.23                  | -1130.99                  | -495.92                   | 449.35                 | 1.32E-22        | <b>7.91E-06</b> | 1.11E-08          | <b>0.000225</b>   |
| SpM1_ChORF1918_s_at    | <i>lacF</i>   | <i>spy1918</i>                | Membrane transport      | Membrane transport              | Carbohydrate membrane transport      | -                          | -                              | -1416.85                  | -1213.38                  | -850.12                   | 205.03                 | 5.33E-23        | <b>7.91E-06</b> | 0.0017154         | <b>0.000583</b>   |
| SpM1_ChORF1856_s_at    | <i>norA</i>   | <i>spy1856</i>                | Membrane transport      | Membrane transport              | Unknown substrate membrane transport | -                          | -                              | -1432.91                  | -1414.82                  | -1414.52                  | -121.28                | 2.22E-46        | <b>7.91E-06</b> | 1.33E-10          | <b>0.000225</b>   |
| SpM18_ChORF1442_s_at   | -             | <i>spyM18_1442</i>            | Unknown                 | Hypothetical protein            | Unknown                              | -                          | -                              | -1452.19                  | -1079.01                  | -526.44                   | -1905.37               | 1.61E-10        | <b>7.91E-06</b> | 3.73E-21          | <b>0.000225</b>   |
| SpM1_ChORF1849_s_at    | <i>pfl</i>    | <i>spy1849</i>                | Carbohydrate metabolism | Carbohydrate assimilation       | Carbohydrate assimilation            | -                          | -                              | -1467.67                  | -78.85                    | -616.79                   | 917.03                 | 6.55E-24        | <b>7.91E-06</b> | 5.64E-19          | <b>0.000225</b>   |
| SpM1_ChORF1059_s_at    | <i>ptsC</i>   | <i>spy1059</i>                | Membrane transport      | Membrane transport              | Carbohydrate membrane transport      | -                          | -                              | -1472.03                  | -1200.33                  | -586.96                   | 422.34                 | 3.71E-23        | <b>7.91E-06</b> | 1.34E-07          | <b>0.000225</b>   |
| SpM12_ChORF269-12_s_at | -             | <i>SpyoM12_Chr ORF_269_12</i> | Unknown                 | Hypothetical protein            | Unknown                              | -                          | -                              | -1472.98                  | -1514.16                  | -1656.97                  | -550.04                | 1.09E-27        | <b>7.91E-06</b> | 1.08E-12          | <b>0.000225</b>   |
| SpM1_ChORF1878_s_at    | -             | <i>spy1878</i>                | RNA metabolism          | Transcription r egulation       |                                      | -                          | -                              | -1484.84                  | -1974.54                  | -1947.45                  | 48.55                  | 1.15E-13        | <b>7.91E-06</b> | 0.6690577         | 0.130192          |
| SpM1_ChORF1919_s_at    | <i>lacD.2</i> | <i>spy1919</i>                | Carbohydrate metabolism | Carbohydrate assimilation       | Carbohydrate assimilation            | -                          | -                              | -1523.55                  | -1315.61                  | -896.36                   | 197.36                 | 2.47E-26        | <b>7.91E-06</b> | 0.0006486         | <b>0.000316</b>   |
| SpM1_ChORF0835_s_at    | <i>carB</i>   | <i>spy0835</i>                | Nucleotides             | Nucleotides biosynthesis        | Pyrimidine biosynthesis              | -                          | -                              | -1528.35                  | -1168.19                  | -1930.28                  | 495.59                 | 2.25E-06        | <b>7.91E-06</b> | 0.0059125         | 0.001762          |
| SpM1_ChORF0303_s_at    | -             | <i>spy0303</i>                | Mobile Genetic Element  | Mobile Genetic Element          | Transposase                          | -                          | -                              | -1548.52                  | -1132.06                  | -873.51                   | 160.86                 | 1.18E-31        | <b>7.91E-06</b> | 0.0005273         | <b>0.000294</b>   |
| SpM1_ChORF1098_s_at    | <i>folP</i>   | <i>spy1098</i>                | Cofactors               | Folate                          | Folate biosynthesis                  | -                          | -                              | -1551.95                  | -1314.37                  | -1618.47                  | 361.62                 | 3.36E-37        | <b>7.91E-06</b> | 1.60E-11          | <b>0.000225</b>   |
| SpM1_ChORF1509_s_at    | <i>clpE</i>   | <i>spy1509</i>                | Stress adaptation       | Protein Metabolism              | Protein Metabolism                   | -                          | -                              | -1554.67                  | -996.67                   | -637.91                   | 249.83                 | 8.22E-26        | <b>7.91E-06</b> | 0.000321          | <b>0.000256</b>   |
| SpM12_ChORF265-4_s_at  | -             | <i>spy2037</i>                | Unknown                 | Hypothetical protein            | Unknown                              | Essential                  | Essential                      | -1573.66                  | -1282.91                  | -800.73                   | -469.33                | 2.43E-35        | <b>7.91E-06</b> | 5.24E-14          | <b>0.000225</b>   |
| SpM1_ChORF1877_s_at    | <i>glnA</i>   | <i>spy1877</i>                | Amino acid metabolism   | Amino acid biosynthesis         | Amino acid biosynthesis              | -                          | -                              | -1608.22                  | -2055.10                  | -2071.09                  | -6.39                  | 1.05E-17        | <b>7.91E-06</b> | 0.9065705         | 0.167329          |

| Probe Set Name*       | Gene Name   | Synonym                      | Category                | Subcategory                     | Function                        | <i>Bacillus subtilis</i> † | <i>Staphylococcus aureus</i> † | Difference Time (30 - 0)‡ | Difference Time (60 - 0)‡ | Difference Time (90 - 0)‡ | Difference (Mut - WT)‡ | P-value (Time)§ | Q-value (Time)§ | P-value (Strain)§ | Q-value (Strain)§ |
|-----------------------|-------------|------------------------------|-------------------------|---------------------------------|---------------------------------|----------------------------|--------------------------------|---------------------------|---------------------------|---------------------------|------------------------|-----------------|-----------------|-------------------|-------------------|
| SpM1_ChORF1058_s_at   | <i>ptsB</i> | <i>spy1058</i>               | Membrane transport      | Membrane transport              | Carbohydrate membrane transport | -                          | -                              | -1706.70                  | -1251.71                  | -422.08                   | 746.52                 | 8.87E-25        | <b>7.91E-06</b> | 5.77E-13          | <b>0.000225</b>   |
| SpM1_ChORF1263_s_at   | -           | <i>spy1263</i>               | Unknown                 | Hypothetical protein            | Unknown                         | -                          | -                              | -1759.97                  | -243.49                   | 1204.66                   | 778.24                 | 1.65E-22        | <b>7.91E-06</b> | 2.10E-07          | <b>0.000225</b>   |
| SpM18_ChORF0709_s_at  | <i>bsaA</i> | <i>spyM18_0709</i>           | Carbohydrate metabolism | Carbohydrate assimilation       | Carbohydrate assimilation       | -                          | -                              | -1766.52                  | 204.03                    | 92.29                     | 695.77                 | 2.14E-22        | <b>7.91E-06</b> | 2.11E-07          | <b>0.000225</b>   |
| SpM1_ChORF1628_s_at   | <i>fmt</i>  | <i>spy1628</i>               | Protein synthesis       | Protein translocation           | Protein secretion               | -                          | -                              | -1845.53                  | -947.29                   | -636.16                   | 177.96                 | 2.91E-30        | <b>7.91E-06</b> | 0.0018491         | 0.000619          |
| SpM1_ChORF1531_s_at   | <i>dpr</i>  | <i>spy1531</i>               | RNA metabolism          | Transcription regulation        | Virulence                       | -                          | -                              | -1917.56                  | -128.72                   | 1178.37                   | -1028.67               | 2.35E-22        | <b>7.91E-06</b> | 5.18E-09          | <b>0.000225</b>   |
| SpM1_ChORF2043_s_at   | <i>sda</i>  | <i>spy2043</i>               | Virulence               | interacting proteins            | Extracellular protein           | -                          | -                              | -2062.64                  | -1291.49                  | -589.54                   | 4907.88                | 2.18E-17        | <b>7.91E-06</b> | 4.36E-45          | <b>0.000225</b>   |
| SpM1_ChORF0512_s_at   | -           | <i>spy0512</i>               | Unknown                 | Hypothetical protein            | Unknown                         | -                          | -                              | -2078.69                  | -1102.35                  | -1370.22                  | 206.75                 | 2.66E-31        | <b>7.91E-06</b> | 0.0009024         | <b>0.000372</b>   |
| SpM1_ChORF1760_s_at   | <i>dnaK</i> | <i>spy1760</i>               | Stress adaptation       | Heat shock proteins             | Heat shock proteins             | -                          | -                              | -2096.04                  | -1054.47                  | 216.27                    | 435.27                 | 7.84E-21        | <b>7.91E-06</b> | 0.0006413         | <b>0.000316</b>   |
| SpM1_ChORF1750_s_at   | <i>fabD</i> | <i>spy1750</i>               | Cell envelope           | Membrane lipids                 | Fatty acid biosynthesis         | -                          | -                              | -2124.73                  | -2124.10                  | -1983.68                  | -217.00                | 2.11E-54        | <b>7.91E-06</b> | 1.55E-10          | <b>0.000225</b>   |
| SpM1_ChORF1759_s_at   | <i>dnaJ</i> | <i>spy1759</i>               | Stress adaptation       | Heat shock proteins             | Heat shock proteins             | -                          | -                              | -2141.25                  | -1042.62                  | 50.28                     | 248.40                 | 3.43E-16        | <b>7.91E-06</b> | 0.084071          | 0.019976          |
| SpM1_ChORF1543_s_at   | -           | <i>spy1543</i>               | Membrane transport      | Membrane transport              | Amino acid membrane transport   | -                          | -                              | -2188.42                  | -1837.94                  | -929.03                   | 527.86                 | 3.89E-24        | <b>7.91E-06</b> | 1.97E-06          | <b>0.000225</b>   |
| SpM12_ChORF249-5_s_at | -           | <i>SpyoM12_Chr ORF_249_5</i> | Unknown                 | Hypothetical protein            | Unknown                         | Essential                  | Essential                      | -2199.15                  | 749.90                    | 627.13                    | 174.40                 | 9.35E-15        | <b>7.91E-06</b> | 0.7367773         | 0.141137          |
| SpM1_ChORF0216_s_at   | -           | <i>spy0216</i>               | RNA metabolism          | Transcription regulation        | Hypothetical                    | -                          | Essential                      | -2222.30                  | -1539.32                  | -359.86                   | 114.04                 | 4.83E-25        | <b>7.91E-06</b> | 0.071137          | 0.017182          |
| SpM1_ChORF1260_s_at   | -           | <i>spy1260</i>               | Unknown                 | Cytosolic Protein               | Unknown                         | -                          | -                              | -2275.88                  | -420.77                   | 1412.50                   | 806.33                 | 6.19E-24        | <b>7.91E-06</b> | 1.04E-06          | <b>0.000225</b>   |
| SpM1_ChORF1743_s_at   | <i>accA</i> | <i>spy1743</i>               | Cell envelope           | Membrane lipids                 | Fatty acid biosynthesis         | -                          | -                              | -2280.37                  | -2293.76                  | -2120.61                  | -131.82                | 1.25E-54        | <b>7.91E-06</b> | 0.0001598         | <b>0.000232</b>   |
| SpM1_ChORF2005_s_at   | -           | <i>spy2005</i>               | Unknown                 | Hypothetical cytosolic Protein  | Unknown                         | -                          | -                              | -2455.47                  | 221.97                    | 386.53                    | 1652.98                | 9.42E-20        | <b>7.91E-06</b> | 1.74E-13          | <b>0.000225</b>   |
| SpM1_ChORF0513_s_at   | <i>pepQ</i> | <i>spy0513</i>               | Amino acid metabolism   | Amino acid catabolism           | Amino acid catabolism           | Essential                  | -                              | -2490.98                  | -1276.42                  | -1976.17                  | 412.10                 | 1.09E-31        | <b>7.91E-06</b> | 3.08E-06          | <b>0.000225</b>   |
| SpM1_ChORF1761_s_at   | <i>grpE</i> | <i>spy1761</i>               | Stress adaptation       | Heat shock proteins             | Heat shock proteins             | -                          | -                              | -2603.71                  | -1575.13                  | -18.77                    | 509.50                 | 4.29E-27        | <b>7.91E-06</b> | 3.94E-06          | <b>0.000225</b>   |
| SpM1_ChORF1542_s_at   | -           | <i>spy1542</i>               | Amino acid metabolism   | Amino acid catabolism           | Amino acid catabolism           | -                          | -                              | -2676.92                  | -2238.17                  | -687.38                   | 799.55                 | 3.50E-24        | <b>7.91E-06</b> | 1.06E-07          | <b>0.000225</b>   |
| SpM1_ChORF1751_s_at   | <i>fabK</i> | <i>spy1751</i>               | Cell envelope           | Membrane lipids                 | Fatty acid biosynthesis         | -                          | -                              | -2786.42                  | -2796.87                  | -2616.71                  | -317.85                | 8.88E-51        | <b>7.91E-06</b> | 5.33E-10          | <b>0.000225</b>   |
| SpM1_ChORF2065_s_at   | -           | <i>spy2065</i>               | Unknown                 | Hypothetical protein            | Unknown                         | -                          | -                              | -2802.75                  | -2002.40                  | -1126.97                  | 25.12                  | 4.86E-25        | <b>7.91E-06</b> | 0.4587776         | 0.093791          |
| SpM1_ChORF1749_s_at   | <i>fabG</i> | <i>spy1749</i>               | Cell envelope           | Membrane lipids                 | Fatty acid biosynthesis         | -                          | -                              | -2960.97                  | -2953.37                  | -2748.09                  | -262.50                | 6.96E-51        | <b>7.91E-06</b> | 3.84E-07          | <b>0.000225</b>   |
| SpM1_ChORF1541_s_at   | <i>arcC</i> | <i>spy1541</i>               | Carbohydrate metabolism | Carbohydrate central metabolism | Carbohydrate central metabolism | -                          | -                              | -3100.32                  | -2614.62                  | -722.03                   | 1028.52                | 1.62E-21        | <b>7.91E-06</b> | 2.29E-07          | <b>0.000225</b>   |
| SpM1_ChORF1746_s_at   | <i>fabZ</i> | <i>spy1746</i>               | Cell envelope           | Membrane lipids                 | Fatty acid biosynthesis         | -                          | -                              | -3100.45                  | -3111.15                  | -2926.11                  | -248.07                | 5.72E-61        | <b>7.91E-06</b> | 3.42E-10          | <b>0.000225</b>   |
| SpM1_ChORF0414_s_at   | <i>lctO</i> | <i>spy0414</i>               | Carbohydrate metabolism | Carbohydrate assimilation       | Carbohydrate assimilation       | Essential                  | Essential                      | -3120.75                  | -375.72                   | -192.01                   | 725.57                 | 1.43E-24        | <b>7.91E-06</b> | 0.0001823         | <b>0.000234</b>   |

| Probe Set Name*     | Gene Name   | Synonym        | Category                | Subcategory                    | Function                | <i>Bacillus subtilis</i> <sup>†</sup> | <i>Staphylococcus aureus</i> <sup>†</sup> | Difference Time (30 - 0) <sup>‡</sup> | Difference Time (60 - 0) <sup>‡</sup> | Difference Time (90 - 0) <sup>‡</sup> | Difference (Mut - WT) <sup>‡</sup> | P-value (Time) <sup>§</sup> | Q-value (Time) <sup>§</sup> | P-value (Strain) <sup>§</sup> | Q-value (Strain) <sup>§</sup> |
|---------------------|-------------|----------------|-------------------------|--------------------------------|-------------------------|---------------------------------------|-------------------------------------------|---------------------------------------|---------------------------------------|---------------------------------------|------------------------------------|-----------------------------|-----------------------------|-------------------------------|-------------------------------|
| SpM1_ChORF1758_s_at | <i>phaB</i> | <i>spy1758</i> | Cell envelope           | Membrane lipids                | Fatty acid biosynthesis | -                                     | -                                         | -3146.61                              | -3183.30                              | -3094.78                              | -303.70                            | 1.69E-53                    | <b>7.91E-06</b>             | 5.47E-09                      | <b>0.000225</b>               |
| SpM1_ChORF1265_s_at | -           | <i>spy1265</i> | Unknown                 | Hypothetical protein           | Unknown                 | -                                     | -                                         | -3198.22                              | -1066.98                              | -632.47                               | 1215.16                            | 3.57E-19                    | <b>7.91E-06</b>             | 1.24E-08                      | <b>0.000225</b>               |
| SpM1_ChORF1262_s_at | -           | <i>spy1262</i> | Unknown                 | Hypothetical Cytosolic Protein | Unknown                 | -                                     | -                                         | -3441.55                              | -845.30                               | 1050.83                               | 815.09                             | 1.09E-21                    | <b>7.91E-06</b>             | 0.0003838                     | <b>0.000267</b>               |
| SpM1_ChORF1747_s_at | <i>accB</i> | <i>spy1747</i> | Cell envelope           | Membrane lipids                | Fatty acid biosynthesis | -                                     | -                                         | -3474.74                              | -3435.68                              | -3173.31                              | -168.18                            | 6.49E-55                    | <b>7.91E-06</b>             | 0.0007903                     | <b>0.000347</b>               |
| SpM1_ChORF0761_s_at | <i>atpC</i> | <i>spy0761</i> | Carbohydrate metabolism | Bioenergetics                  | Bioenergetics           | -                                     | -                                         | -3543.95                              | -4677.87                              | -5410.06                              | -1724.28                           | 1.48E-24                    | <b>7.91E-06</b>             | 9.41E-11                      | <b>0.000225</b>               |
| SpM1_ChORF1261_s_at | -           | <i>spy1261</i> | Unknown                 | Hypothetical Cytosolic Protein | Unknown                 | -                                     | -                                         | -3552.42                              | -985.79                               | 1210.72                               | 964.38                             | 2.67E-27                    | <b>7.91E-06</b>             | 5.87E-07                      | <b>0.000225</b>               |
| SpM1_ChORF1264_s_at | -           | <i>spy1264</i> | Unknown                 | Hypothetical protein           | Unknown                 | -                                     | -                                         | -3642.01                              | -1331.65                              | 119.96                                | 730.72                             | 5.34E-28                    | <b>7.91E-06</b>             | 5.09E-06                      | <b>0.000225</b>               |
| SpM1_ChORF1763_s_at | <i>hrcA</i> | <i>spy1763</i> | RNA metabolism          | Transcription r egulation      |                         | -                                     | -                                         | -4055.09                              | -2554.87                              | -1007.74                              | 415.82                             | 1.03E-27                    | <b>7.91E-06</b>             | 0.0017696                     | <b>0.000598</b>               |
| SpM1_ChORF1613_s_at | -           | <i>spy1613</i> | Unknown                 | Hypothetical protein           | Unknown                 | -                                     | -                                         | -4116.03                              | 872.90                                | 2013.24                               | 1180.66                            | 2.59E-34                    | <b>7.91E-06</b>             | 7.71E-08                      | <b>0.000225</b>               |
| SpM1_ChORF1744_s_at | <i>accD</i> | <i>spy1744</i> | Cell envelope           | Membrane lipids                | Fatty acid biosynthesis | -                                     | -                                         | -4156.76                              | -4155.98                              | -3907.54                              | -174.01                            | 2.49E-51                    | <b>7.91E-06</b>             | 0.0099572                     | 0.002852                      |
| SpM1_ChORF1748_s_at | <i>fabF</i> | <i>spy1748</i> | Cell envelope           | Membrane lipids                | Fatty acid biosynthesis | -                                     | -                                         | -4209.64                              | -4171.14                              | -3933.87                              | -309.79                            | 9.90E-67                    | <b>7.91E-06</b>             | 2.75E-12                      | <b>0.000225</b>               |
| SpM1_ChORF1157_s_at | -           | <i>spy1157</i> | Unknown                 | Hypothetical protein           | Unknown                 | -                                     | -                                         | -4352.74                              | -2040.58                              | 118.38                                | 584.87                             | 5.15E-34                    | <b>7.91E-06</b>             | 3.07E-05                      | <b>0.000225</b>               |
| SpM1_ChORF1754_s_at | <i>fabH</i> | <i>spy1754</i> | Cell envelope           | Membrane lipids                | Fatty acid biosynthesis | -                                     | -                                         | -4372.92                              | -4343.81                              | -4167.51                              | -313.35                            | 2.69E-58                    | <b>7.91E-06</b>             | 1.27E-07                      | <b>0.000225</b>               |
| SpM1_ChORF1755_s_at | -           | <i>spy1755</i> | RNA metabolism          | Transcription r egulation      |                         | -                                     | -                                         | -4546.31                              | -4562.72                              | -4352.46                              | -253.22                            | 3.79E-58                    | <b>7.91E-06</b>             | 0.0001128                     | <b>0.000228</b>               |
| SpM1_ChORF1745_s_at | <i>accC</i> | <i>spy1745</i> | Cell envelope           | Membrane lipids                | Fatty acid biosynthesis | -                                     | -                                         | -4704.88                              | -4666.45                              | -4361.97                              | -290.32                            | 3.38E-63                    | <b>7.91E-06</b>             | 4.21E-08                      | <b>0.000225</b>               |
| SpM1_ChORF1544_s_at | <i>arcB</i> | <i>spy1544</i> | Amino acid metabolism   | Amino acid catabolism          | Amino acid catabolism   | -                                     | -                                         | -5683.09                              | -4548.02                              | -2816.68                              | 978.18                             | 5.12E-30                    | <b>7.91E-06</b>             | 2.91E-06                      | <b>0.000225</b>               |
| SpM1_ChORF1547_s_at | <i>arcA</i> | <i>spy1547</i> | Amino acid metabolism   | Amino acid catabolism          | Amino acid catabolism   | -                                     | -                                         | -5922.87                              | -4014.07                              | -2545.93                              | 1311.14                            | 8.52E-30                    | <b>7.91E-06</b>             | 3.28E-08                      | <b>0.000225</b>               |
| SpM1_ChORF1546_s_at | -           | <i>spy1546</i> | Unknown                 | Hypothetical cytosolic Protein | Unknown                 | -                                     | -                                         | -6506.63                              | -5135.19                              | -3344.18                              | 1239.60                            | 1.72E-30                    | <b>7.91E-06</b>             | 1.84E-07                      | <b>0.000225</b>               |

\*Probe sets are listed according to their Difference Time (30 - 0) values, in descending order.

<sup>†</sup>Summary of gene essentiality data for the related Gram-positive bacteria *Bacillus subtilis* and *Staphylococcus aureus*. "Essential" denotes essential genes; "-" denotes nonessential, or unknown.

<sup>‡</sup>Transcript expression changes, assessed as the difference of median expression values. Positive difference values indicate increased transcript abundance; negative values denote decreased transcript abundance.

<sup>§</sup>Transcription variation, assessed by mixed model ANOVA based on (PM-MM)-based dCHIP expression estimates after a square-root transform for 91 RMLChips.

**Supplementary Table 2.** Group A *Streptococcus* functional classification analysis

| Category*                               | Genes <sup>†</sup> | Time-effect                     |                 | Strain-effect                   |                 |
|-----------------------------------------|--------------------|---------------------------------|-----------------|---------------------------------|-----------------|
|                                         |                    | Empirical <i>P</i> <sup>‡</sup> | Yb <sup>§</sup> | Empirical <i>P</i> <sup>‡</sup> | Yb <sup>§</sup> |
| <b>Cofactors</b>                        | <b>41</b>          | <b>0.0005</b>                   | <b>0.0028</b>   | 0.2540                          | 1.0000          |
| <b>Cell envelope</b>                    | <b>78</b>          | <b>0.0005</b>                   | <b>0.0042</b>   | 0.4461                          | 0.7462          |
| <b>Cell shape and division</b>          | <b>13</b>          | <b>0.0217</b>                   | <b>0.0728</b>   | 0.3186                          | 1.0000          |
| <b>Carbohydrate metabolism</b>          | <b>130</b>         | <b>0.0190</b>                   | <b>0.0799</b>   | 0.4741                          | 0.7209          |
| <b>Nucleotides</b>                      | <b>51</b>          | <b>0.0353</b>                   | <b>0.0990</b>   | 0.3461                          | 0.9782          |
| <b>Amino acid metabolism</b>            | <b>47</b>          | <b>0.0503</b>                   | <b>0.1211</b>   | <b>0.0164</b>                   | <b>0.1425</b>   |
| Stress adaptation                       | 31                 | 0.0873                          | 0.1649          | 0.9302                          | 0.9296          |
| Other                                   | 15                 | 0.0818                          | 0.1738          | 0.6499                          | 0.8434          |
| RNA metabolism                          | 147                | 0.1069                          | 0.1826          | 0.3664                          | 0.8801          |
| Protein synthesis                       | 129                | 0.1461                          | 0.2285          | 0.7368                          | 0.8300          |
| Membrane transport                      | 222                | 0.3224                          | 0.4403          | 0.3908                          | 0.7243          |
| DNA metabolism                          | 70                 | 0.3112                          | 0.4627          | 0.7764                          | 0.8206          |
| Lipid metabolism                        | 6                  | 0.5769                          | 0.7450          | 0.3866                          | 0.8094          |
| Virulence                               | 52                 | 0.6299                          | 0.7568          | 0.1180                          | 1.0000          |
| Mobile genetic element                  | 14                 | 0.8361                          | 0.9464          | 0.6475                          | 0.9129          |
| Unknown                                 | 780                | 0.9995                          | 0.9993          | 0.6799                          | 0.8192          |
| Phage                                   | 99                 | 0.9968                          | 1.0000          | 0.3152                          | 1.0000          |
| <b>Subcategory</b>                      |                    |                                 |                 |                                 |                 |
| <b>Folate</b>                           | <b>9</b>           | <b>0.0009</b>                   | <b>0.0223</b>   | 0.3063                          | 1.0000          |
| <b>Stress proteins</b>                  | <b>1</b>           | <b>0.0077</b>                   | <b>0.0634</b>   | 0.9673                          | 0.9869          |
| <b>Membrane lipids</b>                  | <b>31</b>          | <b>0.0043</b>                   | <b>0.0710</b>   | 0.3823                          | 0.9514          |
| <b>Cell wall</b>                        | <b>47</b>          | <b>0.0074</b>                   | <b>0.0732</b>   | 0.5590                          | 0.8682          |
| <b>CoA</b>                              | <b>2</b>           | <b>0.0070</b>                   | <b>0.0867</b>   | 0.1617                          | 0.7798          |
| S-adenosylmethionine                    | 4                  | 0.0262                          | 0.1291          | 0.0882                          | 0.5754          |
| Heat shock proteins                     | 8                  | 0.0250                          | 0.1369          | 0.8010                          | 0.9528          |
| Bioenergetics                           | 28                 | 0.0233                          | 0.1433          | 0.4715                          | 0.8041          |
| Amino acid catabolism                   | 33                 | 0.0324                          | 0.1448          | 0.0372                          | 0.4947          |
| Cell shape and division                 | 13                 | 0.0217                          | 0.1524          | 0.3186                          | 0.9950          |
| Carbohydrate assimilation               | 58                 | 0.0468                          | 0.1770          | 0.4475                          | 0.8524          |
| Nucleotides metabolism                  | 10                 | 0.0447                          | 0.1834          | 0.7149                          | 0.9392          |
| RNA modification                        | 17                 | 0.0526                          | 0.1847          | 0.1356                          | 0.7168          |
| Nucleotides biosynthesis                | 41                 | 0.0731                          | 0.2401          | 0.2675                          | 1.0000          |
| Conserved protein                       | 11                 | 0.1014                          | 0.3134          | 0.4606                          | 0.8137          |
| Fe-sulfate cluster                      | 7                  | 0.1264                          | 0.3688          | 0.3722                          | 0.9772          |
| Carbohydrate biosynthesis               | 5                  | 0.1422                          | 0.3715          | 0.7766                          | 0.9701          |
| GTP-binding protein                     | 11                 | 0.1504                          | 0.3733          | 0.7941                          | 0.9678          |
| Carbohydrate central metabolism         | 32                 | 0.1772                          | 0.3826          | 0.3911                          | 0.8035          |
| Protein translocation                   | 14                 | 0.1412                          | 0.3900          | 0.8272                          | 0.9613          |
| Protein Metabolism                      | 7                  | 0.1968                          | 0.3912          | 0.8743                          | 0.9711          |
| Transcription regulation                | 115                | 0.1759                          | 0.3973          | 0.5198                          | 0.8602          |
| Ribosomal proteins                      | 60                 | 0.2178                          | 0.4168          | 0.9915                          | 0.9913          |
| Hypothetical cytosolic protein          | 162                | 0.2997                          | 0.4534          | 0.5673                          | 0.8284          |
| Basic replication machinery             | 18                 | 0.3108                          | 0.4565          | 0.8389                          | 0.9527          |
| Membrane transport                      | 222                | 0.3224                          | 0.4602          | 0.3908                          | 0.8395          |
| Translation factors                     | 14                 | 0.2951                          | 0.4606          | 0.9201                          | 1.0000          |
| Hypothetical membrane protein           | 35                 | 0.2861                          | 0.4609          | 0.6417                          | 0.8879          |
| Amino acid biosynthesis                 | 14                 | 0.3704                          | 0.4631          | 0.0874                          | 0.6690          |
| <b>Protein folding and modification</b> | <b>14</b>          | <b>0.3635</b>                   | <b>0.4661</b>   | <b>0.0011</b>                   | <b>0.0275</b>   |
| Basic transcription machinery           | 16                 | 0.3542                          | 0.4662          | 0.2975                          | 1.0000          |
| Packaging & segregation                 | 14                 | 0.2816                          | 0.4691          | 0.9248                          | 0.9836          |
| NAD                                     | 6                  | 0.2544                          | 0.4708          | 0.3841                          | 0.9075          |
| tRNA synthetases                        | 27                 | 0.2760                          | 0.4757          | 0.0328                          | 0.6205          |
| Hypothetical extracellular protein      | 6                  | 0.2708                          | 0.4838          | 0.5620                          | 0.8459          |
| DNA replication/modification & repair   | 35                 | 0.4003                          | 0.4892          | 0.5580                          | 0.8957          |
| Oxidative stress                        | 8                  | 0.5001                          | 0.6005          | 0.9369                          | 0.9757          |
| Unknown                                 | 2                  | 0.5286                          | 0.6207          | 0.3558                          | 0.9869          |
| Isoprenoids                             | 6                  | 0.5769                          | 0.6634          | 0.3866                          | 0.8697          |
| DNA restriction/methylation             | 3                  | 0.6401                          | 0.7056          | 0.0564                          | 0.4884          |
| Virulence interacting proteins          | 52                 | 0.6299                          | 0.7098          | 0.1180                          | 0.6946          |
| Phosphorus metabolism                   | 3                  | 0.7712                          | 0.8181          | 0.0484                          | 0.5086          |
| Cold shock proteins                     | 4                  | 0.7582                          | 0.8216          | 0.4045                          | 0.7982          |
| Mobile Genetic Element                  | 14                 | 0.8361                          | 0.8697          | 0.6475                          | 0.8714          |
| Hypothetical protein                    | 567                | 1.0000                          | 0.9998          | 0.3514                          | 1.0000          |
| Phage proteins                          | 99                 | 0.9968                          | 1.0000          | 0.3152                          | 1.0000          |

\* Bold text denotes functional groups with a nominal *P*-value < 0.05 and the False Discovery Rate (FDR) < 0.10.

<sup>†</sup> Number of genes within functional category.

<sup>‡</sup> Empirical *P*-value, derived from 10,000 random permutations.

<sup>§</sup> Yekutieli-bootstrap adjusted *P*-value, for controlling the False Discovery Rate (FDR).

**Supplementary Table 3.** Ranking for Group A *Streptococcus* MGAS5005 (WT) transcripts during *ex vivo* blood culture.

| Probe Set Name*       | Gene Name           | Synonym                    | Rank<br>0 min | Rank<br>30 min | Rank<br>60 min | Rank<br>90 min |
|-----------------------|---------------------|----------------------------|---------------|----------------|----------------|----------------|
| SpM12_ChORF248-4_s_at | <i>spyM12_248-4</i> | <i>spyoM12_248_4</i>       | 1             | 1              | 1              | 1              |
| SpM1_ChORF2018_at     | <i>emm1</i>         | <i>spy2018</i>             | 5             | 2              | 2              | 6              |
| SpM1_ChORF1831_s_at   | <i>rpsF</i>         | <i>spy1831</i>             | 2             | 3              | 6              | 9              |
| SpM18_ChORF0084_s_at  | <i>spyM18_0084</i>  | <i>spyM18_0084</i>         | 3             | 4              | 3              | 2              |
| SpM1_ChORF2016_at     | <i>sic</i>          | <i>spy2016</i>             | 7             | 5              | 4              | 4              |
| SpM1_ChORF0611_s_at   | <i>tufA</i>         | <i>spy0611</i>             | 8             | 6              | 7              | 7              |
| SpM1_ChORF0913_s_at   | <i>spy0913</i>      | <i>spy0913</i>             | 35            | 7              | 90             | 88             |
| SpM1_ChORF2009_at     | <i>fba</i>          | <i>spy2009</i>             | 14            | 8              | 8              | 21             |
| SpM1_ChORF0717_s_at   | <i>rpmE</i>         | <i>spy0717</i>             | 29            | 9              | 34             | 42             |
| SpM1_ChORF0057_s_at   | <i>rplP</i>         | <i>spy0057</i>             | 15            | 10             | 24             | 28             |
| SpM1_ChORF0731_s_at   | <i>eno</i>          | <i>spy0731</i>             | 10            | 11             | 23             | 31             |
| SpM18_ChORF0281_s_at  | <i>oppA</i>         | <i>spyM18_0281</i>         | 34            | 12             | 11             | 35             |
| SpM1_ChORF0067_s_at   | <i>rplR</i>         | <i>spy0067</i>             | 21            | 13             | 16             | 27             |
| SpM1_ChORF0819_s_at   | <i>rplU</i>         | <i>spy0819</i>             | 43            | 14             | 83             | 96             |
| SpM1_ChORF1760_s_at   | <i>dnaK</i>         | <i>spy1760</i>             | 4             | 15             | 5              | 3              |
| SpM1_ChORF0036_s_at   | <i>purB</i>         | <i>spy0036</i>             | 361           | 16             | 37             | 61             |
| SpM1_ChORF0056_s_at   | <i>rpsC</i>         | <i>spy0056</i>             | 27            | 17             | 41             | 81             |
| SpM1_ChORF0062_s_at   | <i>rplX</i>         | <i>spy0062</i>             | 18            | 18             | 22             | 33             |
| SpM18_ChORF1621_s_at  | <i>spyM18_1621</i>  | <i>spyM18_1621</i>         | 23            | 19             | 18             | 18             |
| SpM1_ChORF1151_s_at   | <i>ldh</i>          | <i>spy1151</i>             | 121           | 20             | 262            | 467            |
| SpM1_ChORF2070_s_at   | <i>groEL</i>        | <i>spy2070</i>             | 13            | 21             | 12             | 15             |
|                       |                     | <i>spyoM5_466b09.s1ck_</i> |               |                |                |                |
| SpM5_ChORF466b-1_s_at | <i>purC</i>         | 1                          | 41            | 22             | 44             | 32             |
| SpM1_ChORF2202_s_at   | <i>hasC</i>         | <i>spy2202</i>             | 72            | 23             | 19             | 40             |
| SpM18_ChORF0030_s_at  | <i>spyM18_0030</i>  | <i>spyM18_0030</i>         | 750           | 24             | 38             | 46             |
| SpM1_ChORF1830_s_at   | <i>ssb2</i>         | <i>spy1830</i>             | 36            | 25             | 39             | 52             |
| SpM1_ChORF2110_s_at   | <i>nrdD</i>         | <i>spy2110</i>             | 73            | 26             | 50             | 66             |
| SpM1_ChORF0061_s_at   | <i>rplN</i>         | <i>spy0061</i>             | 53            | 27             | 72             | 112            |
| SpM1_ChORF0072_s_at   | <i>rplO</i>         | <i>spy0072</i>             | 50            | 28             | 40             | 63             |
| SpM1_ChORF1805_s_at   | <i>secA</i>         | <i>spy1805</i>             | 63            | 29             | 48             | 71             |
| SpM1_ChORF0269_s_at   | <i>prgA</i>         | <i>spy0269</i>             | 42            | 30             | 17             | 26             |
| SpM1_ChORF0167_s_at   | <i>slo</i>          | <i>spy0167</i>             | 37            | 31             | 27             | 56             |
| SpM1_ChORF1630_s_at   | <i>spy1630</i>      | <i>spy1630</i>             | 139           | 32             | 67             | 98             |
| SpM1_ChORF0026_s_at   | <i>purF</i>         | <i>spy0026</i>             | 1261          | 33             | 64             | 74             |
| SpM1_ChORF1676_s_at   | <i>tkt</i>          | <i>spy1676</i>             | 74            | 34             | 33             | 43             |
| SpM1_ChORF0274_s_at   | <i>plr, gap</i>     | <i>spy0274</i>             | 44            | 35             | 47             | 53             |
| SpM1_ChORF0099_s_at   | <i>rpoC</i>         | <i>spy0099</i>             | 47            | 36             | 52             | 69             |
| SpM1_ChORF1520_s_at   | <i>ftsZ</i>         | <i>spy1520</i>             | 61            | 37             | 78             | 170            |
| SpM1_ChORF0761_s_at   | <i>atpC</i>         | <i>spy0761</i>             | 6             | 38             | 60             | 90             |
| SpM1_ChORF0038_s_at   | <i>ruvB</i>         | <i>spy0038</i>             | 155           | 39             | 92             | 116            |
| SpM1_ChORF1633_s_at   | <i>spy1633</i>      | <i>spy1633</i>             | 99            | 40             | 113            | 106            |
| SpM1_ChORF0427_s_at   | <i>nrdE.1</i>       | <i>spy0427</i>             | 978           | 41             | 31             | 49             |
| SpM1_ChORF0747_s_at   | <i>spy0747</i>      | <i>spy0747</i>             | 404           | 42             | 55             | 64             |
| SpM1_ChORF1759_s_at   | <i>dnaJ</i>         | <i>spy1759</i>             | 17            | 43             | 20             | 14             |
| SpM1_ChORF1213_s_at   | <i>fhs.1</i>        | <i>spy1213</i>             | 435           | 44             | 85             | 102            |
| SpM1_ChORF2114_s_at   | <i>spy2114</i>      | <i>spy2114</i>             | 60            | 45             | 29             | 70             |
| SpM1_ChORF1649_s_at   | <i>pbp1A</i>        | <i>spy1649</i>             | 59            | 46             | 30             | 47             |
| SpM1_ChORF0064_s_at   | <i>rpsN</i>         | <i>spy0064</i>             | 65            | 47             | 62             | 94             |
| SpM1_ChORF0060_s_at   | <i>rpsQ</i>         | <i>spy0060</i>             | 57            | 48             | 75             | 95             |
| SpM1_ChORF0416_s_at   | <i>prtS</i>         | <i>spy0416</i>             | 93            | 49             | 26             | 37             |
| SpM18_ChORF2196_x_at  | <i>rpmF</i>         | <i>spyM18_2196</i>         | 108           | 50             | 258            | 208            |
| SpM1_ChORF1262_s_at   | <i>spy1262</i>      | <i>spy1262</i>             | 9             | 51             | 10             | 5              |



| Probe Set Name *        | Gene Name                  | Synonym                    | Rank<br>0 min | Rank<br>30 min | Rank<br>60 min | Rank<br>90 min |
|-------------------------|----------------------------|----------------------------|---------------|----------------|----------------|----------------|
| SpM1_ChORF2079_s_at     | <i>ahpC</i>                | <i>spy2079</i>             | 56            | 52             | 15             | 10             |
| SpM1_ChORF2010_s_at     | <i>scpA</i>                | <i>spy2010</i>             | 68            | 53             | 73             | 115            |
| SpM12_ChORF249-5_s_at   | <i>spyM12_249-5</i>        | <i>spyoM12_249_5</i>       | 19            | 54             | 9              | 12             |
| SpM1_ChORF1738_s_at     | <i>manL</i>                | <i>spy1738</i>             | 556           | 55             | 59             | 189            |
| SpM1_ChORF1212_s_at     | <i>spy1212</i>             | <i>spy1212</i>             | 449           | 56             | 105            | 125            |
| SpM1_ChORF1265_s_at     | <i>spy1265</i>             | <i>spy1265</i>             | 11            | 57             | 14             | 16             |
| SpM1_ChORF1373_s_at     | <i>ptsH</i>                | <i>spy1373</i>             | 70            | 58             | 125            | 207            |
| SpM1_ChORF2080_s_at     | <i>ahpF</i>                | <i>spy2080</i>             | 58            | 59             | 21             | 13             |
| SpM1_ChORF0833_s_at     | <i>carA</i>                | <i>spy0833</i>             | 48            | 60             | 88             | 148            |
| SpM1_ChORF0124_s_at     | <i>rofA</i>                | <i>spy0124</i>             | 67            | 61             | 91             | 138            |
| SpM1_ChORF1801_s_at     | <i>isp2</i>                | <i>spy1801</i>             | 66            | 62             | 45             | 38             |
| SpM1_ChORF1370_s_at     | <i>spy1370</i>             | <i>spy1370</i>             | 181           | 63             | 147            | 235            |
| SpM1_ChORF1136_s_at     | <i>xpt</i>                 | <i>spy1136</i>             | 972           | 64             | 189            | 223            |
| SpM1_ChORF0015_s_at     | <i>ftsH</i>                | <i>spy0015</i>             | 92            | 65             | 104            | 120            |
| SpM1_ChORF2043_s_at     | <i>sda</i>                 | <i>spy2043</i>             | 30            | 66             | 46             | 34             |
| SpM1_ChORF1968_s_at     | <i>spy1968</i>             | <i>spy1968</i>             | 137           | 67             | 176            | 315            |
| SpM1_ChORF0075_s_at     | <i>infA</i>                | <i>spy0075</i>             | 75            | 68             | 281            | 650            |
| SpM1_ChORF1357_s_at     | <i>grab</i>                | <i>spy1357</i>             | 129           | 69             | 95             | 135            |
| SpM1_ChORF0034_s_at     | <i>purK</i>                | <i>spy0034</i>             | 1157          | 70             | 120            | 128            |
| SpM1_ChORF0272_s_at     | <i>rpsG</i>                | <i>spy0272</i>             | 85            | 71             | 110            | 99             |
| SpM1_ChORF0758_s_at     | <i>atpA</i>                | <i>spy0758</i>             | 64            | 72             | 183            | 267            |
| M12_0555_s_at           | M12_0555                   | M12_0555                   | 86            | 73             | 69             | 41             |
| SpM1_ChORF0032_s_at     | <i>purD</i>                | <i>spy0032</i>             | 957           | 74             | 98             | 101            |
| SpM18_ChORF1442_s_at    | <i>spyM18_1442</i>         | <i>spyM18_1442</i>         | 45            | 75             | 70             | 54             |
| SpM1_ChORF1227_s_at     | <i>spy1227</i>             | <i>spy1227</i>             | 316           | 76             | 157            | 231            |
| SpM1_ChORF1763_s_at     | <i>hrcA</i>                | <i>spy1763</i>             | 12            | 77             | 36             | 19             |
| SpM1_ChORF0810_s_at     | <i>aroF</i>                | <i>spy0810</i>             | 159           | 78             | 202            | 215            |
| SpM12_ChORF248-6_s_at   | <i>spyM12_248-6</i>        | <i>spyoM12_248_6</i>       | 95            | 79             | 49             | 50             |
| SpM3_ChORF1092_s_at     | <i>hoIA</i>                | <i>spyM3_1092</i>          | 51            | 80             | 71             | 59             |
| SpM1_ChORF1020_s_at     | <i>spy1020</i>             | <i>spy1020</i>             | 140           | 81             | 97             | 166            |
| SpM1_ChORF0872_s_at     | <i>spy0872</i>             | <i>spy0872</i>             | 1279          | 82             | 332            | 644            |
|                         | <i>spyM5_4P31a01.w2c23</i> | <i>spyoM5_4P31a01.w2c2</i> |               |                |                |                |
| SpM5_ChORF4P31a-118_s_ε | <i>09-11</i>               | <i>309_11</i>              | 132           | 83             | 221            | 628            |
| SpM1_ChORF1122_s_at     | <i>nifS, yrvO</i>          | <i>spy1122</i>             | 116           | 84             | 172            | 245            |
| SpM1_ChORF0835_s_at     | <i>carB</i>                | <i>spy0835</i>             | 52            | 85             | 79             | 123            |
| SpM1_ChORF1429_s_at     | <i>gpmA</i>                | <i>spy1429</i>             | 291           | 86             | 211            | 226            |
| SpM1_ChORF0273_s_at     | <i>fus</i>                 | <i>spy0273</i>             | 80            | 87             | 99             | 89             |
| SpM18_ChORF0328_s_at    | <i>covR</i>                | <i>spy0336</i>             | 130           | 88             | 154            | 167            |
| SpM1_ChORF2065_s_at     | <i>spy2065</i>             | <i>spy2065</i>             | 28            | 89             | 63             | 39             |
| SpM1_ChORF1821_s_at     | <i>efp</i>                 | <i>spy1821</i>             | 103           | 90             | 61             | 77             |
| SpM1_ChORF0900_s_at     | <i>pyrF</i>                | <i>spy0900</i>             | 219           | 91             | 292            | 577            |
| SpM1_ChORF1228_s_at     | <i>spy1228</i>             | <i>spy1228</i>             | 176           | 92             | 109            | 119            |
| SpM1_ChORF2005_s_at     | <i>spy2005</i>             | <i>spy2005</i>             | 33            | 93             | 25             | 23             |
| SpM1_ChORF1489_s_at     | <i>hlpA</i>                | <i>spy1489</i>             | 152           | 94             | 181            | 264            |
| SpM1_ChORF0345_s_at     | <i>murC</i>                | <i>spy0345</i>             | 197           | 95             | 144            | 171            |
| SpM1_ChORF0832_s_at     | <i>pyrB</i>                | <i>spy0832</i>             | 77            | 96             | 111            | 216            |
| SpM1_ChORF1888_s_at     | <i>rpmB</i>                | <i>spy1888</i>             | 288           | 97             | 236            | 410            |
| SpM1_ChORF2200_s_at     | <i>hasA</i>                | <i>spy2200</i>             | 380           | 98             | 103            | 181            |
| SpM1_ChORF1737_s_at     | <i>spy1737</i>             | <i>spy1737</i>             | 471           | 99             | 392            | 498            |
| SpM1_ChORF0066_s_at     | <i>rplF</i>                | <i>spy0066</i>             | 147           | 100            | 138            | 209            |
| SpM1_ChORF1979_at       | <i>ska</i>                 | <i>spy1979</i>             | 100           | 101            | 53             | 62             |
| SpM1_ChORF1137_s_at     | <i>spy1137</i>             | <i>spy1137</i>             | 1297          | 102            | 265            | 304            |
| SpM1_ChORF1518_s_at     | <i>spy1518</i>             | <i>spy1518</i>             | 94            | 103            | 106            | 211            |
| SpM1_ChORF2195_s_at     | <i>spy2195</i>             | <i>spy2195</i>             | 407           | 104            | 394            | 571            |
| SpM1_ChORF0073_s_at     | <i>secY</i>                | <i>spy0073</i>             | 124           | 105            | 102            | 131            |
| SpM1_ChORF1200_s_at     | <i>ffh</i>                 | <i>spy1200</i>             | 292           | 106            | 259            | 255            |

| Probe Set Name *     | Gene Name          | Synonym            | Rank<br>0 min | Rank<br>30 min | Rank<br>60 min | Rank<br>90 min |
|----------------------|--------------------|--------------------|---------------|----------------|----------------|----------------|
| SpM1_ChORF0453_s_at  | <i>mtsA</i>        | <i>spy0453</i>     | 335           | 107            | 180            | 224            |
| SpM1_ChORF1264_s_at  | <i>spy1264</i>     | <i>spy1264</i>     | 20            | 108            | 28             | 17             |
| SpM1_ChORF2151_s_at  | <i>argS</i>        | <i>spy2151</i>     | 456           | 109            | 101            | 242            |
| SpM1_ChORF1739_s_at  | <i>manM</i>        | <i>spy1739</i>     | 324           | 110            | 80             | 172            |
| SpM1_ChORF0297_s_at  | <i>oppF</i>        | <i>spy0297</i>     | 118           | 111            | 65             | 79             |
| SpM1_ChORF1406_s_at  | <i>sodA</i>        | <i>spy1406</i>     | 69            | 112            | 77             | 87             |
| SpM1_ChORF0080_s_at  | <i>rpoA</i>        | <i>spy0080</i>     | 78            | 113            | 322            | 626            |
| SpM1_ChORF0348_s_at  | <i>spy0348</i>     | <i>spy0348</i>     | 172           | 114            | 134            | 144            |
| SpM1_ChORF2113_s_at  | <i>spy2113</i>     | <i>spy2113</i>     | 114           | 115            | 66             | 109            |
| SpM1_ChORF1882_s_at  | <i>lppC</i>        | <i>spy1882</i>     | 261           | 116            | 87             | 91             |
| SpM1_ChORF0901_s_at  | <i>pyrE</i>        | <i>spy0901</i>     | 229           | 117            | 341            | 683            |
| SpM1_ChORF0052_s_at  | <i>rpIB</i>        | <i>spy0052</i>     | 126           | 118            | 173            | 188            |
| SpM1_ChORF1415_s_at  | <i>deaD</i>        | <i>spy1415</i>     | 98            | 119            | 122            | 114            |
| SpM1_ChORF0782_s_at  | <i>rpoD</i>        | <i>spy0782</i>     | 90            | 120            | 129            | 127            |
| SpM1_ChORF1527_s_at  | <i>typA</i>        | <i>spy1527</i>     | 148           | 121            | 333            | 379            |
| SpM1_ChORF0078_s_at  | <i>rpsK</i>        | <i>spy0078</i>     | 110           | 122            | 426            | 891            |
| SpM1_ChORF0341_s_at  | <i>pgdA</i>        | <i>spy0341</i>     | 89            | 123            | 82             | 76             |
| SpM1_ChORF1521_s_at  | <i>ftsA</i>        | <i>spy1521</i>     | 170           | 124            | 213            | 342            |
| SpM1_ChORF1761_s_at  | <i>grpE</i>        | <i>spy1761</i>     | 40            | 125            | 76             | 30             |
| SpM1_ChORF2032_s_at  | <i>spy2032</i>     | <i>spy2032</i>     | 76            | 126            | 35             | 44             |
| SpM1_ChORF1242_s_at  | <i>pstB2</i>       | <i>spy1242</i>     | 177           | 127            | 196            | 297            |
| SpM1_ChORF1282_s_at  | <i>pyk, pykA</i>   | <i>spy1282</i>     | 96            | 128            | 238            | 233            |
| SpM1_ChORF1946_s_at  | <i>pnpA</i>        | <i>spy1946</i>     | 227           | 129            | 206            | 310            |
| SpM1_ChORF1261_s_at  | <i>spy1261</i>     | <i>spy1261</i>     | 25            | 130            | 32             | 11             |
| SpM1_ChORF1283_s_at  | <i>pfk</i>         | <i>spy1283</i>     | 144           | 131            | 306            | 306            |
| SpM1_ChORF0027_s_at  | <i>purM</i>        | <i>spy0027</i>     | 1403          | 132            | 146            | 140            |
| SpM1_ChORF1931_s_at  | <i>rpsI</i>        | <i>spy1931</i>     | 434           | 133            | 457            | 482            |
| SpM1_ChORF2025_s_at  | <i>isp</i>         | <i>spy2025</i>     | 81            | 134            | 42             | 45             |
| SpM1_ChORF1355_s_at  | <i>spy1355</i>     | <i>spy1355</i>     | 215           | 135            | 165            | 203            |
| SpM1_ChORF0822_s_at  | <i>rpmA</i>        | <i>spy0822</i>     | 200           | 136            | 289            | 277            |
| SpM1_ChORF0186_s_at  | <i>spy0186</i>     | <i>spy0186</i>     | 107           | 137            | 107            | 122            |
| SpM1_ChORF1419_s_at  | <i>spy1419</i>     | <i>spy1419</i>     | 360           | 138            | 320            | 359            |
| SpM1_ChORF0033_s_at  | <i>purE</i>        | <i>spy0033</i>     | 1002          | 139            | 151            | 158            |
| SpM1_ChORF0503_s_at  | <i>spy0503</i>     | <i>spy0503</i>     | 128           | 140            | 160            | 153            |
| SpM1_ChORF1416_s_at  | <i>prfC</i>        | <i>spy1416</i>     | 183           | 141            | 142            | 139            |
| SpM1_ChORF0160_s_at  | <i>purA</i>        | <i>spy0160</i>     | 234           | 142            | 163            | 248            |
| SpM1_ChORF0216_s_at  | <i>spy0216</i>     | <i>spy0216</i>     | 54            | 143            | 100            | 58             |
| SpM1_ChORF1531_s_at  | <i>dpr</i>         | <i>spy1531</i>     | 62            | 144            | 51             | 25             |
| SpM1_ChORF1889_s_at  | <i>fba</i>         | <i>spy1889</i>     | 218           | 145            | 518            | 663            |
| SpM1_ChORF2116_s_at  | <i>recA</i>        | <i>spy2116</i>     | 201           | 146            | 226            | 311            |
| SpM1_ChORF1499_s_at  | <i>xseB</i>        | <i>spy1499</i>     | 416           | 147            | 148            | 287            |
| SpM1_ChORF2201_s_at  | <i>hasB</i>        | <i>spy2201</i>     | 385           | 148            | 124            | 204            |
| SpM1_ChORF0349_s_at  | <i>greA</i>        | <i>spy0349</i>     | 205           | 149            | 272            | 290            |
| SpM1_ChORF0098_s_at  | <i>rpoB</i>        | <i>spy0098</i>     | 150           | 150            | 244            | 281            |
| SpM18_ChORF2095_s_at | <i>spyM18_2095</i> | <i>spyM18_2095</i> | 586           | 151            | 156            | 274            |
| SpM1_ChORF1390_s_at  | <i>surA, prsA</i>  | <i>spy1390</i>     | 138           | 152            | 301            | 357            |
| SpM1_ChORF0187_s_at  | <i>perR</i>        | <i>spy0187</i>     | 134           | 153            | 114            | 126            |
| SpM1_ChORF1894_s_at  | <i>pyrG</i>        | <i>spy1894</i>     | 274           | 154            | 297            | 271            |
| SpM1_ChORF0339_s_at  | <i>dnaB</i>        | <i>spy0339</i>     | 133           | 155            | 123            | 149            |
| SpM1_ChORF0035_s_at  | <i>abiR</i>        | <i>spy0035</i>     | 737           | 156            | 136            | 141            |
| SpM1_ChORF0071_s_at  | <i>rpmD</i>        | <i>spy0071</i>     | 196           | 157            | 149            | 196            |
| SpM1_ChORF1372_s_at  | <i>pstI</i>        | <i>spy1372</i>     | 209           | 158            | 372            | 709            |
| SpM1_ChORF1260_s_at  | <i>spy1260</i>     | <i>spy1260</i>     | 55            | 159            | 54             | 22             |
| SpM1_ChORF1072_s_at  | <i>rpIJ</i>        | <i>spy1072</i>     | 193           | 160            | 410            | 607            |
| SpM1_ChORF1865_s_at  | <i>spy1865</i>     | <i>spy1865</i>     | 517           | 161            | 270            | 300            |
| SpM1_ChORF1643_s_at  | <i>spy1643</i>     | <i>spy1643</i>     | 127           | 162            | 207            | 176            |

| Probe Set Name *     | Gene Name           | Synonym            | Rank<br>0 min | Rank<br>30 min | Rank<br>60 min | Rank<br>90 min |
|----------------------|---------------------|--------------------|---------------|----------------|----------------|----------------|
| SpM1_ChORF0608_s_at  | <i>ppc</i>          | <i>spy0608</i>     | 333           | 163            | 324            | 470            |
| SpM1_ChORF0337_s_at  | <i>covS</i>         | <i>spy0337</i>     | 251           | 164            | 250            | 280            |
| SpM1_ChORF1896_s_at  | <i>ropA</i>         | <i>spy1896</i>     | 543           | 165            | 503            | 580            |
| SpM1_ChORF0821_s_at  | <i>spy0821</i>      | <i>spy0821</i>     | 220           | 166            | 291            | 237            |
| SpM1_ChORF1727_s_at  | <i>spy1727</i>      | <i>spy1727</i>     | 428           | 167            | 223            | 447            |
| SpM1_ChORF0116_at    | <i>spy0116</i>      | <i>spy0116</i>     | 334           | 168            | 126            | 163            |
| SpM1_ChORF0809_s_at  | <i>aroD</i>         | <i>spy0809</i>     | 241           | 169            | 286            | 356            |
| SpM1_ChORF0053_x_at  | <i>rpsS</i>         | <i>spy0053</i>     | 224           | 170            | 280            | 317            |
| SpM1_ChORF0184_s_at  | <i>opuABC</i>       | <i>spy0184</i>     | 135           | 171            | 164            | 111            |
| SpM1_ChORF0890_s_at  | <i>deoB</i>         | <i>spy0890</i>     | 111           | 172            | 204            | 229            |
| SpM1_ChORF1350_s_at  | <i>psr</i>          | <i>spy1350</i>     | 226           | 173            | 203            | 197            |
| SpM1_ChORF0644_s_at  | <i>ftsE</i>         | <i>spy0644</i>     | 122           | 174            | 208            | 200            |
| SpM1_ChORF0019_s_at  | <i>sibA</i>         | <i>spy0019</i>     | 533           | 175            | 430            | 352            |
| SpM1_ChORF2073_s_at  | <i>clpC</i>         | <i>spy2073</i>     | 125           | 176            | 127            | 117            |
| SpM1_ChORF1029_s_at  | <i>acoC</i>         | <i>spy1029</i>     | 153           | 177            | 121            | 129            |
| SpM1_ChORF0728_s_at  | <i>spy0728</i>      | <i>spy0728</i>     | 203           | 178            | 190            | 175            |
| SpM1_ChORF0502_s_at  | <i>secG</i>         | <i>spy0502</i>     | 284           | 179            | 314            | 332            |
| SpM1_ChORF1536_s_at  | <i>spy1536</i>      | <i>spy1536</i>     | 211           | 180            | 342            | 425            |
| SpM1_ChORF0028_s_at  | <i>purN</i>         | <i>spy0028</i>     | 1461          | 181            | 175            | 162            |
| SpM1_ChORF0069_s_at  | <i>rpsE</i>         | <i>spy0069</i>     | 222           | 182            | 179            | 218            |
| SpM1_ChORF0122_s_at  | <i>spy0122</i>      | <i>spy0122</i>     | 376           | 183            | 378            | 429            |
| SpM1_ChORF0378_s_at  | <i>hlyX</i>         | <i>spy0378</i>     | 403           | 184            | 283            | 282            |
| SpM1_ChORF0759_s_at  | <i>atpG</i>         | <i>spy0759</i>     | 91            | 185            | 371            | 442            |
| SpM1_ChORF0136_s_at  | <i>spy0136</i>      | <i>spy0136</i>     | 372           | 186            | 243            | 451            |
| SpM1_ChORF1239_s_at  | <i>pepN</i>         | <i>spy1239</i>     | 239           | 187            | 277            | 408            |
| SpM1_ChORF1073_s_at  | <i>rplL</i>         | <i>spy1073</i>     | 208           | 188            | 296            | 405            |
| SpM1_ChORF1494_s_at  | <i>spy1494</i>      | <i>spy1494</i>     | 400           | 189            | 185            | 236            |
| SpM1_ChORF1150_s_at  | <i>nox</i>          | <i>spy1150</i>     | 321           | 190            | 240            | 251            |
| SpM1_ChORF0808_s_at  | <i>spy0808</i>      | <i>spy0808</i>     | 325           | 191            | 340            | 361            |
| SpM1_ChORF0781_s_at  | <i>dnaG</i>         | <i>spy0781</i>     | 167           | 192            | 219            | 185            |
| SpM1_ChORF0595_s_at  | <i>lysS</i>         | <i>spy0595</i>     | 426           | 193            | 358            | 418            |
| SpM1_ChORF0271_s_at  | <i>rpsL</i>         | <i>spy0271</i>     | 305           | 194            | 345            | 256            |
| SpM1_ChORF0888_s_at  | <i>clpL</i>         | <i>spy0888</i>     | 120           | 195            | 86             | 51             |
| SpM1_ChORF0763_s_at  | <i>murA, murAA?</i> | <i>spy0763</i>     | 304           | 196            | 308            | 336            |
| SpM1_ChORF2159_s_at  | <i>rpmF</i>         | <i>spy2159</i>     | 306           | 197            | 504            | 437            |
| SpM1_ChORF1224_s_at  | <i>pgmA</i>         | <i>spy1224</i>     | 296           | 198            | 169            | 289            |
| SpM1_ChORF0902_s_at  | <i>amiC</i>         | <i>spy0902</i>     | 185           | 199            | 246            | 463            |
| SpM1_ChORF1371_s_at  | <i>gapN</i>         | <i>spy1371</i>     | 101           | 200            | 420            | 537            |
| SpM1_ChORF1519_s_at  | <i>spy1519</i>      | <i>spy1519</i>     | 173           | 201            | 216            | 364            |
| SpM1_ChORF2033_s_at  | <i>spy2033</i>      | <i>spy2033</i>     | 204           | 202            | 56             | 67             |
| SpM18_ChORF0867_s_at | <i>rpl35</i>        | <i>spyM18_0867</i> | 236           | 203            | 316            | 230            |
| SpM1_ChORF1432_s_at  | <i>pyrD</i>         | <i>spy1432</i>     | 532           | 204            | 587            | 855            |
| SpM1_ChORF2092_s_at  | <i>rpsB</i>         | <i>spy2092</i>     | 431           | 205            | 559            | 479            |
| SpM1_ChORF0501_s_at  | <i>spy0501</i>      | <i>spy0501</i>     | 301           | 206            | 412            | 386            |
| SpM1_ChORF0080a_s_at | <i>rplQ</i>         | <i>spy0080a</i>    | 180           | 207            | 792            | 1390           |
| SpM1_ChORF0460_s_at  | <i>rplK</i>         | <i>spy0460</i>     | 442           | 208            | 476            | 358            |
| SpM1_ChORF1881_s_at  | <i>pgk</i>          | <i>spy1881</i>     | 326           | 209            | 249            | 450            |
| SpM1_ChORF0065_s_at  | <i>rpsH</i>         | <i>spy0065</i>     | 217           | 210            | 214            | 270            |
| SpM1_ChORF1135_s_at  | <i>guaC</i>         | <i>spy1135</i>     | 1324          | 211            | 648            | 754            |
| SpM1_ChORF0296_s_at  | <i>oppD</i>         | <i>spy0296</i>     | 223           | 212            | 119            | 152            |
| SpM1_ChORF1944_s_at  | <i>cysE</i>         | <i>spy1944</i>     | 238           | 213            | 253            | 351            |
| SpM18_ChORF2197_x_at | <i>rpmG</i>         | <i>spyM18_2197</i> | 259           | 214            | 578            | 468            |
| SpM1_ChORF0569_s_at  | <i>ftsY</i>         | <i>spy0569</i>     | 210           | 215            | 145            | 184            |
| SpM1_ChORF0165_s_at  | <i>nga</i>          | <i>spy0165</i>     | 417           | 216            | 269            | 411            |
| SpM1_ChORF0247_s_at  | <i>spy0247</i>      | <i>spy0247</i>     | 363           | 217            | 255            | 313            |
| SpM1_ChORF0050_s_at  | <i>rplD</i>         | <i>spy0050</i>     | 307           | 218            | 393            | 384            |

| Probe Set Name *    | Gene Name           | Synonym              | Rank<br>0 min | Rank<br>30 min | Rank<br>60 min | Rank<br>90 min |
|---------------------|---------------------|----------------------|---------------|----------------|----------------|----------------|
| SpM1_ChORF1026_s_at | <i>acoA, pdhB</i>   | <i>spy1026</i>       | 195           | 219            | 205            | 198            |
| SpM1_ChORF1981_s_at | <i>relA</i>         | <i>spy1981</i>       | 164           | 220            | 224            | 259            |
| SpM1_ChORF1398_s_at | <i>spy1398</i>      | <i>spy1398</i>       | 117           | 221            | 137            | 97             |
| SpM1_ChORF1740_s_at | <i>manN</i>         | <i>spy1740</i>       | 534           | 222            | 159            | 323            |
| SpM1_ChORF1721_s_at | <i>infB</i>         | <i>spy1721</i>       | 136           | 223            | 135            | 100            |
| SpM1_ChORF0059_s_at | <i>rpmC</i>         | <i>spy0059</i>       | 207           | 224            | 252            | 295            |
| SpM1_ChORF1876_s_at | <i>spy1876</i>      | <i>spy1876</i>       | 389           | 225            | 278            | 217            |
| SpM1_ChORF0613_s_at | <i>tpi</i>          | <i>spy0613</i>       | 346           | 226            | 200            | 303            |
| SpM1_ChORF0049_s_at | <i>rpIC</i>         | <i>spy0049</i>       | 349           | 227            | 520            | 457            |
| SpM1_ChORF0949_s_at | <i>spy0949</i>      | <i>spy0949</i>       | 493           | 228            | 182            | 173            |
| SpM1_ChORF1495_s_at | <i>recN</i>         | <i>spy1495</i>       | 440           | 229            | 199            | 292            |
| SpM1_ChORF0805_s_at | <i>rpmI</i>         | <i>spy0805</i>       | 269           | 230            | 349            | 253            |
| SpM1_ChORF2160_x_at | <i>rpmG</i>         | <i>spy2160</i>       | 277           | 231            | 627            | 492            |
| SpM1_ChORF1511_s_at | <i>spy1511</i>      | <i>spy1511</i>       | 113           | 232            | 150            | 124            |
| SpM1_ChORF2206_s_at | <i>guaB</i>         | <i>spy2206</i>       | 462           | 233            | 263            | 389            |
| SpM1_ChORF0894_s_at | <i>deoD2</i>        | <i>spy0894</i>       | 192           | 234            | 287            | 318            |
| SpM1_ChORF1028_s_at | <i>acoB, pdhC</i>   | <i>spy1028</i>       | 228           | 235            | 177            | 178            |
| SpM1_ChORF1096_s_at | <i>folC.1</i>       | <i>spy1096</i>       | 141           | 236            | 274            | 268            |
| SpM1_ChORF0721_s_at | <i>spy0721</i>      | <i>spy0721</i>       | 460           | 237            | 459            | 440            |
| SpM1_ChORF0804_s_at | <i>infC</i>         | <i>spy0804</i>       | 255           | 238            | 329            | 210            |
| SpM1_ChORF0447_s_at | <i>pfs</i>          | <i>spy0447</i>       | 242           | 239            | 284            | 276            |
| SpM1_ChORF1215_s_at | <i>spy1215</i>      | <i>spy1215</i>       | 359           | 240            | 117            | 145            |
| SpM1_ChORF1157_s_at | <i>spy1157</i>      | <i>spy1157</i>       | 26            | 241            | 57             | 20             |
| SpM1_ChORF1885_s_at | <i>spy1885</i>      | <i>spy1885</i>       | 399           | 242            | 261            | 301            |
| SpM1_ChORF0395_s_at | <i>clpP</i>         | <i>spy0395</i>       | 225           | 243            | 273            | 212            |
| SpM1_ChORF0867_s_at | <i>spy0867</i>      | <i>spy0867</i>       | 171           | 244            | 217            | 174            |
| SpM1_ChORF1434_s_at | <i>spy1434</i>      | <i>spy1434</i>       | 231           | 245            | 293            | 179            |
| SpM1_ChORF2183_s_at | <i>rpII</i>         | <i>spy2183</i>       | 272           | 246            | 424            | 685            |
| SpM1_ChORF1152_s_at | <i>gyrA</i>         | <i>spy1152</i>       | 285           | 247            | 453            | 406            |
| SpM1_ChORF1719_s_at | <i>rbfA</i>         | <i>spy1719</i>       | 157           | 248            | 143            | 110            |
| SpM1_ChORF0051_s_at | <i>rpIW</i>         | <i>spy0051</i>       | 308           | 249            | 377            | 391            |
| SpM12_ChORF251-6_at | <i>spyM12_251-6</i> | <i>spyoM12_251_6</i> | 143           | 250            | 193            | 190            |
| SpM1_ChORF0504_s_at | <i>spy0504</i>      | <i>spy0504</i>       | 194           | 251            | 251            | 193            |
| SpM1_ChORF0443_s_at | <i>gcaD</i>         | <i>spy0443</i>       | 302           | 252            | 361            | 393            |
| SpM1_ChORF0215_s_at | <i>pgi</i>          | <i>spy0215</i>       | 785           | 253            | 346            | 522            |
| SpM1_ChORF2107_s_at | <i>spy2107</i>      | <i>spy2107</i>       | 310           | 254            | 233            | 199            |
| SpM1_ChORF0340_s_at | <i>dnal</i>         | <i>spy0340</i>       | 162           | 255            | 133            | 134            |
| SpM1_ChORF1654_s_at | <i>spy1653</i>      | <i>spy1653</i>       | 365           | 256            | 414            | 372            |
| SpM1_ChORF1070_s_at | <i>spy1070</i>      | <i>spy1070</i>       | 145           | 257            | 266            | 284            |
| SpM1_ChORF0268_s_at | <i>purR</i>         | <i>spy0268</i>       | 479           | 258            | 256            | 309            |
| SpM1_ChORF1664_s_at | <i>mraY</i>         | <i>spy1662</i>       | 273           | 259            | 362            | 329            |
| SpM1_ChORF1724_s_at | <i>nusA</i>         | <i>spy1724</i>       | 178           | 260            | 188            | 147            |
| SpM1_ChORF0428_s_at | <i>spyA</i>         | <i>spy0428</i>       | 313           | 261            | 247            | 213            |
| SpM1_ChORF0041_s_at | <i>spy0041</i>      | <i>spy0041</i>       | 312           | 262            | 237            | 220            |
| SpM1_ChORF0623_s_at | <i>pacL</i>         | <i>spy0623</i>       | 332           | 263            | 343            | 316            |
| SpM1_ChORF0392_s_at | <i>upp</i>          | <i>spy0392</i>       | 351           | 264            | 825            | 805            |
| SpM1_ChORF1945_s_at | <i>spy1945</i>      | <i>spy1945</i>       | 338           | 265            | 317            | 432            |
| SpM1_ChORF1938_s_at | <i>spy1938</i>      | <i>spy1938</i>       | 154           | 266            | 365            | 475            |
| SpM1_ChORF1613_s_at | <i>spy1613</i>      | <i>spy1613</i>       | 31            | 267            | 13             | 8              |
| SpM1_ChORF0063_s_at | <i>rpIE</i>         | <i>spy0063</i>       | 276           | 268            | 271            | 322            |
| SpM1_ChORF1280_s_at | <i>glmS</i>         | <i>spy1280</i>       | 303           | 269            | 241            | 183            |
| SpM1_ChORF1508_s_at | <i>spy1508</i>      | <i>spy1508</i>       | 1048          | 270            | 702            | 917            |
| SpM1_ChORF1648_s_at | <i>recU</i>         | <i>spy1648</i>       | 328           | 271            | 232            | 325            |
| SpM1_ChORF1507_s_at | <i>spy1507</i>      | <i>spy1507</i>       | 1070          | 272            | 407            | 499            |
| SpM1_ChORF1514_s_at | <i>divIVAS</i>      | <i>spy1514</i>       | 371           | 273            | 327            | 474            |
| SpM1_ChORF0166_s_at | <i>spy0166</i>      | <i>spy0166</i>       | 329           | 274            | 302            | 434            |
| SpM1_ChORF0076_x_at | <i>rpmJ</i>         | <i>spy0076</i>       | 283           | 275            | 657            | 1134           |
| SpM1_ChORF2184_s_at | <i>spy2184</i>      | <i>spy2184</i>       | 390           | 276            | 611            | 811            |

| Probe Set Name *        | Gene Name            | Synonym               | Rank<br>0 min | Rank<br>30 min | Rank<br>60 min | Rank<br>90 min |
|-------------------------|----------------------|-----------------------|---------------|----------------|----------------|----------------|
| SpM1_ChORF1780_s_at     | <i>spy1780</i>       | <i>spy1780</i>        | 184           | 277            | 116            | 136            |
| M12_0671_s_at           | M12_0671             | M12_0671              | 603           | 278            | 849            | 999            |
| SpM1_ChORF1500_s_at     | <i>xseA</i>          | <i>spy1500</i>        | 711           | 279            | 364            | 530            |
| SpM1_ChORF0189_s_at     | <i>spy0189</i>       | <i>spy0189</i>        | 293           | 280            | 229            | 194            |
| SpM18_ChORF0838_x_at    | <i>rplU</i>          | <i>spyM18_0838</i>    | 447           | 281            | 462            | 471            |
| SpM1_ChORF0851_s_at     | <i>spy0851</i>       | <i>spy0851</i>        | 247           | 282            | 612            | 612            |
| SpM1_ChORF1211_s_at     | <i>spy1211</i>       | <i>spy1211</i>        | 166           | 283            | 328            | 234            |
| SpM1_ChORF1148_s_at     | <i>spy1148</i>       | <i>spy1148</i>        | 235           | 284            | 260            | 221            |
| SpM1_ChORF0875_s_at     | <i>spy0875</i>       | <i>spy0875</i>        | 282           | 285            | 212            | 247            |
| SpM1_ChORF1053_s_at     | <i>lepA</i>          | <i>spy1053</i>        | 358           | 286            | 310            | 260            |
| SpM1_ChORF2026_s_at     | <i>ihk</i>           | <i>spy2026</i>        | 179           | 287            | 118            | 108            |
| SpM1_ChORF1509_s_at     | <i>clpE</i>          | <i>spy1509</i>        | 105           | 288            | 194            | 155            |
| SpM1_ChORF1653_s_at     | <i>nadE</i>          | <i>spy1652</i>        | 620           | 289            | 228            | 239            |
| SpM1_ChORF2156_s_at     | <i>aspS</i>          | <i>spy2156</i>        | 604           | 290            | 451            | 598            |
| SpM1_ChORF2072_s_at     | <i>groES</i>         | <i>spy2072</i>        | 214           | 291            | 231            | 165            |
| SpM1_ChORF0330_s_at     | <i>lemA</i>          | <i>spy0330</i>        | 230           | 292            | 408            | 566            |
| SpM1_ChORF0514_s_at     | <i>ccpA</i>          | <i>spy0514</i>        | 295           | 293            | 161            | 232            |
| SpM1_ChORF0343_s_at     | <i>spy0343</i>       | <i>spy0343</i>        | 415           | 294            | 439            | 456            |
| SpM1_ChORF0324_s_at     | <i>spy0324</i>       | <i>spy0324</i>        | 859           | 295            | 406            | 376            |
| SpM18_ChORF2122_s_at    | <i>spyM18_2122</i>   | <i>spyM18_2122</i>    | 355           | 296            | 132            | 85             |
| SpM1_ChORF2205_s_at     | <i>spy2205</i>       | <i>spy2205</i>        | 637           | 297            | 404            | 416            |
| SpM1_ChORF2093_s_at     | <i>tsf</i>           | <i>spy2093</i>        | 410           | 298            | 502            | 519            |
| SpM1_ChORF1632_s_at     | <i>gmk</i>           | <i>spy1632</i>        | 655           | 299            | 415            | 435            |
| SpM1_ChORF0380_s_at     | <i>ppaC</i>          | <i>spy0380</i>        | 212           | 300            | 305            | 343            |
| SpM1_ChORF1340_s_at     | <i>spy1340</i>       | <i>spy1340</i>        | 520           | 301            | 864            | 1270           |
| SpM1_ChORF1877_s_at     | <i>glnA</i>          | <i>spy1877</i>        | 106           | 302            | 497            | 510            |
| SpM1_ChORF1691_s_at     | <i>spy1691</i>       | <i>spy1691</i>        | 266           | 303            | 264            | 228            |
| SpM1_ChORF1962_s_at     | <i>proS</i>          | <i>spy1962</i>        | 233           | 304            | 282            | 285            |
| SpM1_ChORF1276_s_at     | <i>spy1276</i>       | <i>spy1276</i>        | 731           | 305            | 357            | 403            |
| SpM49_ChORF8094-13_s_at | <i>spy0025</i>       | <i>spy0025</i>        | 1656          | 306            | 396            | 362            |
| SpM1_ChORF1146_s_at     | <i>spy1146</i>       | <i>spy1146</i>        | 245           | 307            | 295            | 340            |
| SpM1_ChORF1098_s_at     | <i>folP</i>          | <i>spy1098</i>        | 112           | 308            | 268            | 346            |
| SpM1_ChORF0047_s_at     | <i>rpsJ</i>          | <i>spy0047</i>        | 617           | 309            | 828            | 687            |
| SpM1_ChORF0924_s_at     | <i>elaC</i>          | <i>spy0924</i>        | 250           | 310            | 368            | 319            |
| SpM1_ChORF0100_s_at     | <i>spy0100</i>       | <i>spy0100</i>        | 368           | 311            | 574            | 581            |
| SpM1_ChORF1937_s_at     | <i>spy1937</i>       | <i>spy1937</i>        | 198           | 312            | 432            | 491            |
| SpM1_ChORF1886_s_at     | <i>asp</i>           | <i>spy1886</i>        | 508           | 313            | 331            | 430            |
| SpM1_ChORF1878_s_at     | <i>spy1878</i>       | <i>spy1878</i>        | 119           | 314            | 541            | 526            |
| SpM1_ChORF0727_s_at     | <i>gyrB</i>          | <i>spy0727</i>        | 309           | 315            | 300            | 266            |
| SpM1_ChORF0584_s_at     | <i>ptsK, hprK</i>    | <i>spy0584</i>        | 263           | 316            | 290            | 334            |
| SpM1_ChORF0469_s_at     | <i>spy0469</i>       | <i>spy0469</i>        | 652           | 317            | 507            | 480            |
| SpM1_ChORF0266_s_at     | <i>spy0266</i>       | <i>spy0266</i>        | 240           | 318            | 195            | 177            |
| SpM1_ChORF1392_s_at     | <i>spy1392</i>       | <i>spy1392</i>        | 915           | 319            | 567            | 573            |
| SpM1_ChORF2182_s_at     | <i>holB</i>          | <i>spy2182</i>        | 382           | 320            | 516            | 725            |
| SpM1_ChORF1503_s_at     | <i>spy1503</i>       | <i>spy1503</i>        | 158           | 321            | 227            | 214            |
| SpM1_ChORF0425_s_at     | <i>nrdF.1</i>        | <i>spy0425</i>        | 1399          | 322            | 534            | 556            |
| SpM1_ChORF1204_s_at     | <i>guaA</i>          | <i>spy1204</i>        | 519           | 323            | 545            | 729            |
| SpM1_ChORF2197_s_at     | <i>spy2197</i>       | <i>spy2197</i>        | 639           | 324            | 640            | 897            |
| SpM1_ChORF1234_s_at     | <i>rpsT</i>          | <i>spy1234</i>        | 829           | 325            | 655            | 826            |
| SpM1_ChORF0903_s_at     | <i>spy0903</i>       | <i>spy0903</i>        | 246           | 326            | 337            | 645            |
| SpM1_ChORF2178_s_at     | <i>rpsD</i>          | <i>spy2178</i>        | 574           | 327            | 815            | 667            |
| SpM1_ChORF0446_s_at     | <i>spy0446</i>       | <i>spy0446</i>        | 271           | 328            | 335            | 339            |
| SpM1_ChORF0836_s_at     | <i>spy0836</i>       | <i>spy0836</i>        | 315           | 329            | 162            | 257            |
| SpM12_ChORF269-12_s_at  | <i>spyM12_269-12</i> | <i>spyoM12_269_12</i> | 123           | 330            | 356            | 400            |
| SpM1_ChORF0096_s_at     | <i>tyrS</i>          | <i>spy0096</i>        | 629           | 331            | 485            | 1034           |
| SpM1_ChORF0933_s_at     | <i>cpsFO</i>         | <i>spy0933</i>        | 258           | 332            | 352            | 388            |
| SpM1_ChORF0515_s_at     | <i>spy0515</i>       | <i>spy0515</i>        | 279           | 333            | 398            | 366            |
| SpM1_ChORF0516_s_at     | <i>spy0516</i>       | <i>spy0516</i>        | 249           | 334            | 353            | 307            |
| SpM1_ChORF0055_s_at     | <i>rplV</i>          | <i>spy0055</i>        | 374           | 335            | 437            | 546            |
| SpM1_ChORF2216_s_at     | <i>htrA</i>          | <i>spy2216</i>        | 286           | 336            | 218            | 261            |

| Probe Set Name *      | Gene Name         | Synonym           | Rank<br>0 min | Rank<br>30 min | Rank<br>60 min | Rank<br>90 min |
|-----------------------|-------------------|-------------------|---------------|----------------|----------------|----------------|
| SpM1_ChORF0907_s_at   | <i>pyrC</i>       | <i>spy0907</i>    | 559           | 337            | 466            | 627            |
| SpM1_ChORF0911_s_at   | <i>bcaT</i>       | <i>spy0911</i>    | 739           | 338            | 363            | 702            |
| SpM18_ChORF1226_s_at  | <i>spy1277</i>    | <i>spy1277</i>    | 638           | 339            | 570            | 525            |
| SpM1_ChORF1226_s_at   | <i>spy1226</i>    | <i>spy1226</i>    | 572           | 340            | 336            | 337            |
| SpM1_ChORF0077_s_at   | <i>rpsM</i>       | <i>spy0077</i>    | 320           | 341            | 791            | 1268           |
| SpM1_ChORF0885_s_at   | <i>clpX</i>       | <i>spy0885</i>    | 237           | 342            | 498            | 655            |
| SpM1_ChORF1884_s_at   | <i>spy1884</i>    | <i>spy1884</i>    | 553           | 343            | 170            | 154            |
| SpM1_ChORF0886_s_at   | <i>spy0886</i>    | <i>spy0886</i>    | 244           | 344            | 535            | 736            |
| SpM1_ChORF1875_s_at   | <i>spy1875</i>    | <i>spy1875</i>    | 681           | 345            | 489            | 483            |
| SpM1_ChORF0183_s_at   | <i>opuAA</i>      | <i>spy0183</i>    | 257           | 346            | 321            | 180            |
| SpM1_ChORF0406_s_at   | <i>spy0406</i>    | <i>spy0406</i>    | 267           | 347            | 298            | 250            |
| SpM1_ChORF0585_s_at   | <i>lgt</i>        | <i>spy0585</i>    | 353           | 348            | 385            | 396            |
| SpM1_ChORF2119_s_at   | <i>ruvA</i>       | <i>spy2119</i>    | 331           | 349            | 384            | 502            |
| SpM1_ChORF0935_s_at   | <i>cpsFP</i>      | <i>spy0935</i>    | 252           | 350            | 402            | 493            |
| SpM1_ChORF1770_s_at   | <i>gatB</i>       | <i>spy1770</i>    | 323           | 351            | 443            | 532            |
| SpM1_ChORF1733_s_at   | <i>lytR</i>       | <i>spy1733</i>    | 625           | 352            | 400            | 299            |
| SpM1_ChORF1354_s_at   | <i>map</i>        | <i>spy1354</i>    | 422           | 353            | 376            | 412            |
| SpM1_ChORF1154_s_at   | <i>srtA</i>       | <i>spy1154</i>    | 384           | 354            | 479            | 489            |
| SpM1_ChORF1425_s_at   | <i>spy1425</i>    | <i>spy1425</i>    | 531           | 355            | 315            | 308            |
| SpM1_ChORF1688_at     | <i>glyS</i>       | <i>spy1688</i>    | 202           | 356            | 348            | 427            |
| SpM1_ChORF1249_s_at   | <i>spy1249</i>    | <i>spy1249</i>    | 640           | 357            | 311            | 439            |
| SpM3_ChORF0158_s_at   | <i>spyM3_0158</i> | <i>spyM3_0158</i> | 168           | 358            | 318            | 205            |
| SpM1_ChORF1832_s_at   | <i>spy1832</i>    | <i>spy1832</i>    | 278           | 359            | 326            | 331            |
| SpM1_ChORF1628_s_at   | <i>fmt</i>        | <i>spy1628</i>    | 102           | 360            | 168            | 150            |
| SpM1_ChORF0022_s_at   | <i>plsX</i>       | <i>spy0022</i>    | 495           | 361            | 374            | 515            |
| SpM1_ChORF1214_s_at   | <i>lplA</i>       | <i>spy1214</i>    | 549           | 362            | 197            | 192            |
| SpM1_ChORF1666_s_at   | <i>ftsL</i>       | <i>spy1665</i>    | 585           | 363            | 643            | 597            |
| SpM1_ChORF1263_s_at   | <i>spy1263</i>    | <i>spy1263</i>    | 109           | 364            | 112            | 57             |
| SpM1_ChORF0276_s_at   | <i>spy0276</i>    | <i>spy0276</i>    | 707           | 365            | 651            | 876            |
| SpM1_ChORF2027_s_at   | <i>irr</i>        | <i>spy2027</i>    | 265           | 366            | 174            | 168            |
| SpM1_ChORF0517_s_at   | <i>thrS</i>       | <i>spy0517</i>    | 405           | 367            | 447            | 441            |
| SpM1_ChORF1841_s_at   | <i>spy1841</i>    | <i>spy1841</i>    | 651           | 368            | 595            | 780            |
| SpM1_ChORF0376_s_at   | <i>spy0376</i>    | <i>spy0376</i>    | 461           | 369            | 350            | 365            |
| SpM1_ChORF0224_s_at   | <i>hasC.2</i>     | <i>spy0224</i>    | 264           | 370            | 313            | 283            |
| SpM1_ChORF1698_s_at   | <i>spy1698</i>    | <i>spy1698</i>    | 692           | 371            | 971            | 1326           |
| SpM1_ChORF1976_s_at   | <i>msmK</i>       | <i>spy1976</i>    | 341           | 372            | 96             | 104            |
| SpM1_ChORF0093_s_at   | <i>adcC</i>       | <i>spy0093</i>    | 745           | 373            | 586            | 542            |
| SpM1_ChORF1038_s_at   | <i>femD</i>       | <i>spy1038</i>    | 576           | 374            | 490            | 590            |
| SpM1_ChORF1771_s_at   | <i>gatA</i>       | <i>spy1771</i>    | 427           | 375            | 526            | 621            |
| SpM1_ChORF1497_s_at   | <i>hlyA1</i>      | <i>spy1497</i>    | 653           | 376            | 325            | 436            |
| SpM1_ChORF1892_s_at   | <i>spy1892</i>    | <i>spy1892</i>    | 542           | 377            | 622            | 638            |
| SpM1_ChORF1358_s_at   | <i>murZ</i>       | <i>spy1358</i>    | 451           | 378            | 463            | 415            |
| SpM1_ChORF0461_s_at   | <i>rplA</i>       | <i>spy0461</i>    | 643           | 379            | 726            | 557            |
| SpM1_ChORF0382_s_at   | <i>spy0382</i>    | <i>spy0382</i>    | 348           | 380            | 444            | 438            |
| SpM1_ChORF0359_s_at   | <i>spy0359</i>    | <i>spy0359</i>    | 610           | 381            | 616            | 721            |
| SpM1_ChORF0588_s_at   | <i>spy0588</i>    | <i>spy0588</i>    | 262           | 382            | 254            | 262            |
| SpM1_ChORF0577_at     | <i>spy0577</i>    | <i>spy0577</i>    | 161           | 383            | 411            | 613            |
| SpM1_ChORF0724_s_at   | <i>rplS</i>       | <i>spy0724</i>    | 524           | 384            | 508            | 390            |
| SpM1_ChORF1031_s_at   | <i>acoL, pdhD</i> | <i>spy1031</i>    | 436           | 385            | 285            | 238            |
| SpM1_ChORF0591_s_at   | <i>spy0591</i>    | <i>spy0591</i>    | 557           | 386            | 548            | 501            |
| SpM1_ChORF0287_s_at   | <i>spy0287</i>    | <i>spy0287</i>    | 463           | 387            | 634            | 738            |
| SpM1_ChORF1364_s_at   | <i>dnaX</i>       | <i>spy1364</i>    | 444           | 388            | 517            | 458            |
| SpM12_ChORF273-5_s_at | <i>spy0331</i>    | <i>spy0331</i>    | 268           | 389            | 401            | 504            |
| SpM1_ChORF0295_s_at   | <i>oppC</i>       | <i>spy0295</i>    | 439           | 390            | 275            | 314            |
| SpM1_ChORF1245_s_at   | <i>pstS</i>       | <i>spy1245</i>    | 599           | 391            | 620            | 752            |
| SpM1_ChORF0123_s_at   | <i>hsp33</i>      | <i>spy0123</i>    | 682           | 392            | 652            | 684            |
| SpM1_ChORF0097_s_at   | <i>pbp1b</i>      | <i>spy0097</i>    | 356           | 393            | 446            | 481            |
| SpM1_ChORF1874_s_at   | <i>spy1874</i>    | <i>spy1874</i>    | 670           | 394            | 818            | 967            |
| SpM1_ChORF1626_s_at   | <i>pppL/stp1</i>  | <i>spy1626</i>    | 260           | 395            | 323            | 246            |
| SpM1_ChORF1143_s_at   | <i>spy1143</i>    | <i>spy1143</i>    | 378           | 396            | 418            | 503            |
| SpM1_ChORF2029_s_at   | <i>spy2029</i>    | <i>spy2029</i>    | 319           | 397            | 220            | 187            |

| Probe Set Name *     | Gene Name                  | Synonym                    | Rank<br>0 min | Rank<br>30 min | Rank<br>60 min | Rank<br>90 min |
|----------------------|----------------------------|----------------------------|---------------|----------------|----------------|----------------|
| SpM1_ChORF2063_s_at  | <i>spy2063</i>             | <i>spy2063</i>             | 480           | 398            | 210            | 137            |
| SpM1_ChORF0589_s_at  | <i>spy0589</i>             | <i>spy0589</i>             | 854           | 399            | 856            | 867            |
| SpM1_ChORF0246_s_at  | <i>fasX</i>                | <i>spy0246</i>             | 728           | 400            | 543            | 710            |
| SpM1_ChORF0760_s_at  | <i>atpD</i>                | <i>spy0760</i>             | 163           | 401            | 419            | 464            |
| SpM1_ChORF1651_s_at  | <i>pepC</i>                | <i>spy1651</i>             | 213           | 402            | 464            | 630            |
| SpM1_ChORF0294_s_at  | <i>oppB</i>                | <i>spy0294</i>             | 473           | 403            | 303            | 312            |
| SpM1_ChORF2077_x_at  | <i>csp</i>                 | <i>spy2077</i>             | 221           | 404            | 532            | 553            |
| SpM1_ChORF1872_s_at  | <i>spy1872</i>             | <i>spy1872</i>             | 487           | 405            | 677            | 806            |
| SpM1_ChORF1837_s_at  | <i>mutS2</i>               | <i>spy1837</i>             | 615           | 406            | 565            | 595            |
| SpM1_ChORF0756_s_at  | <i>atpF</i>                | <i>spy0756</i>             | 298           | 407            | 722            | 862            |
| SpM1_ChORF1145_s_at  | <i>glyA</i>                | <i>spy1145</i>             | 354           | 408            | 399            | 462            |
| SpM1_ChORF0226_s_at  | <i>gpsA</i>                | <i>spy0226</i>             | 387           | 409            | 615            | 701            |
| SpM1_ChORF1378_s_at  | <i>nrdF.2</i>              | <i>spy1378</i>             | 592           | 410            | 641            | 849            |
| SpM1_ChORF1730_s_at  | <i>hit</i>                 | <i>spy1730</i>             | 386           | 411            | 187            | 201            |
| SpM1_ChORF1399_s_at  | <i>nagB</i>                | <i>spy1399</i>             | 243           | 412            | 294            | 186            |
| SpM1_ChORF1627_s_at  | <i>sunL</i>                | <i>spy1627</i>             | 191           | 413            | 299            | 244            |
| SpM1_ChORF0040_s_at  | <i>spy0040</i>             | <i>spy0040</i>             | 398           | 414            | 330            | 324            |
| SpM1_ChORF1240_s_at  | <i>phoU</i>                | <i>spy1240</i>             | 485           | 415            | 454            | 636            |
| SpM1_ChORF0476_s_at  | <i>era</i>                 | <i>spy0476</i>             | 357           | 416            | 473            | 496            |
| SpM1_ChORF1736_s_at  | <i>spy1736</i>             | <i>spy1736</i>             | 857           | 417            | 590            | 476            |
| SpM1_ChORF0357_s_at  | <i>spy0357</i>             | <i>spy0357</i>             | 299           | 418            | 720            | 558            |
| SpM1_ChORF0778_s_at  | <i>spy0778</i>             | <i>spy0778</i>             | 551           | 419            | 531            | 631            |
| SpM1_ChORF0879_s_at  | <i>spy0879</i>             | <i>spy0879</i>             | 322           | 420            | 448            | 385            |
| SpM18_ChORF0279_s_at | <i>spyM18_0279</i>         | <i>spyM18_0279</i>         | 727           | 421            | 700            | 662            |
| SpM1_ChORF1659_s_at  | <i>spy1658</i>             | <i>spy1658</i>             | 548           | 422            | 690            | 714            |
| SpM1_ChORF1787_s_at  | <i>spy1787</i>             | <i>spy1787</i>             | 345           | 423            | 379            | 397            |
| SpM1_ChORF0865_s_at  | <i>spy0865</i>             | <i>spy0865</i>             | 486           | 424            | 461            | 454            |
| SpM1_ChORF0786_s_at  | <i>rgpAc</i>               | <i>spy0786</i>             | 633           | 425            | 681            | 772            |
| SpM18_ChORF1214_s_at | <i>spyM18_1214</i>         | <i>spyM18_1214</i>         | 151           | 426            | 152            | 73             |
| SpM1_ChORF0444_s_at  | <i>spy0444</i>             | <i>spy0444</i>             | 402           | 427            | 440            | 460            |
| SpM12_ChORF299-14_at | <i>spyoM12_ChORF_299_1</i> | <i>spyoM12_ChORF_299_1</i> | 807           | 428            | 242            | 335            |
| SpM1_ChORF1123_s_at  | <i>4</i>                   | <i>4</i>                   | 453           | 429            | 536            | 640            |
| SpM1_ChORF0002_s_at  | <i>prs</i>                 | <i>spy1123</i>             | 580           | 430            | 527            | 594            |
| SpM1_ChORF2111_s_at  | <i>dnaA</i>                | <i>spy0002</i>             | 478           | 431            | 450            | 420            |
| SpM1_ChORF1867_s_at  | <i>spy2111</i>             | <i>spy2111</i>             | 367           | 432            | 307            | 249            |
| SpM1_ChORF0645_s_at  | <i>deoC</i>                | <i>spy1867</i>             | 350           | 433            | 481            | 443            |
| SpM1_ChORF1619_s_at  | <i>ftsX</i>                | <i>spy0645</i>             | 418           | 434            | 455            | 569            |
| SpM1_ChORF1097_s_at  | <i>spy1619</i>             | <i>spy1619</i>             | 182           | 435            | 431            | 536            |
| SpM1_ChORF0334_s_at  | <i>folE</i>                | <i>spy1097</i>             | 438           | 436            | 604            | 494            |
| SpM1_ChORF0513_s_at  | <i>spy0334</i>             | <i>spy0334</i>             | 83            | 437            | 158            | 265            |
| SpM1_ChORF2095_s_at  | <i>pepQ</i>                | <i>spy0513</i>             | 343           | 438            | 474            | 941            |
| SpM1_ChORF0121_s_at  | <i>pepO</i>                | <i>spy2095</i>             | 656           | 439            | 644            | 694            |
| SpM1_ChORF0303_s_at  | <i>spy0121</i>             | <i>spy0121</i>             | 142           | 440            | 304            | 240            |
| SpM1_ChORF1493_s_at  | <i>spy0303</i>             | <i>spy0303</i>             | 488           | 441            | 434            | 514            |
| SpM1_ChORF0840_s_at  | <i>spy1493</i>             | <i>spy1493</i>             | 511           | 442            | 577            | 523            |
| SpM1_ChORF1389_s_at  | <i>rpsP</i>                | <i>spy0840</i>             | 330           | 443            | 529            | 623            |
| SpM1_ChORF0006_s_at  | <i>alaS</i>                | <i>spy1389</i>             | 865           | 444            | 575            | 797            |
| SpM1_ChORF1225_s_at  | <i>spy0006</i>             | <i>spy0006</i>             | 699           | 445            | 413            | 419            |
| SpM1_ChORF1673_s_at  | <i>spy1225</i>             | <i>spy1225</i>             | 455           | 446            | 347            | 286            |
| SpM1_ChORF0617_s_at  | <i>spy1673</i>             | <i>spy1673</i>             | 698           | 447            | 706            | 1038           |
| SpM1_ChORF0108_s_at  | <i>spy0617</i>             | <i>spy0617</i>             | 962           | 448            | 930            | 1112           |
| SpM1_ChORF0887_s_at  | <i>spy0108</i>             | <i>spy0108</i>             | 691           | 449            | 707            | 648            |
| SpM1_ChORF0619_s_at  | <i>spy0887</i>             | <i>spy0887</i>             | 581           | 450            | 389            | 348            |
| SpM1_ChORF1862_s_at  | <i>spy0619</i>             | <i>spy0619</i>             | 683           | 451            | 359            | 478            |
| SpM1_ChORF0583_s_at  | <i>spy1862</i>             | <i>spy1862</i>             | 175           | 452            | 469            | 520            |
| SpM1_ChORF0074_s_at  | <i>spy0583</i>             | <i>spy0583</i>             | 747           | 453            | 688            | 1392           |
| SpM1_ChORF2105_s_at  | <i>adk</i>                 | <i>spy0074</i>             | 420           | 454            | 355            | 293            |
| SpM1_ChORF0910_s_at  | <i>nrdG</i>                | <i>spy2105</i>             | 337           | 455            | 523            | 465            |
| SpM1_ChORF1359_s_at  | <i>parC</i>                | <i>spy0910</i>             | 566           | 456            | 696            | 705            |
| SpM1_ChORF0769_s_at  | <i>metK</i>                | <i>spy1359</i>             | 347           | 457            | 493            | 509            |
|                      | <i>pheT</i>                | <i>spy0769</i>             |               |                |                |                |

| Probe Set Name *     | Gene Name            | Synonym            | Rank<br>0 min | Rank<br>30 min | Rank<br>60 min | Rank<br>90 min |
|----------------------|----------------------|--------------------|---------------|----------------|----------------|----------------|
| SpM1_ChORF2106_s_at  | <i>spy2106</i>       | <i>spy2106</i>     | 433           | 458            | 339            | 278            |
| SpM18_ChORF2167_x_at | <i>spyM18_2167</i>   | <i>spyM18_2167</i> | 476           | 459            | 436            | 375            |
| SpM1_ChORF0288_s_at  | <i>nifS, csd</i>     | <i>spy0288</i>     | 464           | 460            | 621            | 728            |
| SpM1_ChORF0817_s_at  | <i>thil</i>          | <i>spy0817</i>     | 623           | 461            | 708            | 741            |
| SpM1_ChORF0188_s_at  | <i>vlg</i>           | <i>spy0188</i>     | 445           | 462            | 383            | 338            |
| SpM1_ChORF1674_s_at  | <i>spy1674</i>       | <i>spy1674</i>     | 509           | 463            | 422            | 402            |
| SpM1_ChORF1217_s_at  | <i>spy1217</i>       | <i>spy1217</i>     | 526           | 464            | 279            | 328            |
| SpM1_ChORF0462_s_at  | <i>pyrH</i>          | <i>spy0462</i>     | 565           | 465            | 709            | 679            |
| SpM1_ChORF1436_s_at  | <i>mf3</i>           | <i>spy1436</i>     | 187           | 466            | 198            | 151            |
| SpM1_ChORF1742_s_at  | <i>serS</i>          | <i>spy1742</i>     | 830           | 467            | 603            | 686            |
| SpM1_ChORF1932_s_at  | <i>rplM</i>          | <i>spy1932</i>     | 849           | 468            | 887            | 852            |
| SpM1_ChORF1529_s_at  | <i>glcK</i>          | <i>spy1529</i>     | 536           | 469            | 288            | 395            |
| SpM1_ChORF1781_s_at  | <i>spy1781</i>       | <i>spy1781</i>     | 424           | 470            | 467            | 601            |
| SpM1_ChORF1523_s_at  | <i>divIB</i>         | <i>spy1523</i>     | 413           | 471            | 428            | 414            |
| SpM1_ChORF0936_s_at  | <i>cpsFQ</i>         | <i>spy0936</i>     | 344           | 472            | 530            | 606            |
| SpM1_ChORF0650_s_at  | <i>aspC</i>          | <i>spy0650</i>     | 771           | 473            | 649            | 659            |
| SpM1_ChORF0109_s_at  | <i>ackA</i>          | <i>spy0109</i>     | 891           | 474            | 846            | 1008           |
| SpM1_ChORF0813_at    | <i>gor/gpoA/gshR</i> | <i>spy0813</i>     | 419           | 475            | 387            | 321            |
| SpM1_ChORF0915_s_at  | <i>spy0915</i>       | <i>spy0915</i>     | 811           | 476            | 665            | 554            |
| SpM1_ChORF1247_s_at  | <i>spy1247</i>       | <i>spy1247</i>     | 496           | 477            | 598            | 681            |
| SpM1_ChORF0757_s_at  | <i>atpH</i>          | <i>spy0757</i>     | 314           | 478            | 714            | 863            |
| SpM1_ChORF1230_s_at  | <i>cdd</i>           | <i>spy1230</i>     | 824           | 479            | 499            | 511            |
| SpM1_ChORF1686_s_at  | <i>spy1686</i>       | <i>spy1686</i>     | 174           | 480            | 225            | 146            |
| SpM1_ChORF0426_s_at  | <i>nrdI</i>          | <i>spy0426</i>     | 1408          | 481            | 591            | 568            |
| SpM1_ChORF0248_s_at  | <i>spy0248</i>       | <i>spy0248</i>     | 597           | 482            | 425            | 516            |
| SpM1_ChORF0467_s_at  | <i>spy0467</i>       | <i>spy0467</i>     | 712           | 483            | 468            | 495            |
| SpM1_ChORF1965_s_at  | <i>uppS</i>          | <i>spy1965</i>     | 544           | 484            | 560            | 618            |
| SpM1_ChORF1281_s_at  | <i>sipC</i>          | <i>spy1281</i>     | 377           | 485            | 338            | 296            |
| SpM1_ChORF0919_at    | <i>spy0919</i>       | <i>spy0919</i>     | 188           | 486            | 386            | 593            |
| SpM1_ChORF1533_s_at  | <i>spy1533</i>       | <i>spy1533</i>     | 525           | 487            | 511            | 533            |
| M12_1023_s_at        | M12_1023             | M12_1023           | 663           | 488            | 617            | 599            |
| SpM1_ChORF1149_s_at  | <i>spy1149</i>       | <i>spy1149</i>     | 475           | 489            | 441            | 353            |
| SpM1_ChORF1259_s_at  | <i>spy1259</i>       | <i>spy1259</i>     | 459           | 490            | 429            | 333            |
| SpM1_ChORF1644_s_at  | <i>spy1644</i>       | <i>spy1644</i>     | 317           | 491            | 380            | 243            |
| SpM1_ChORF0593_s_at  | <i>spy0593</i>       | <i>spy0593</i>     | 352           | 492            | 178            | 227            |
| SpM1_ChORF0486_s_at  | <i>spy0486</i>       | <i>spy0486</i>     | 452           | 493            | 417            | 401            |
| SpM1_ChORF1496_s_at  | <i>spy1496</i>       | <i>spy1496</i>     | 846           | 494            | 483            | 654            |
| SpM1_ChORF0277_s_at  | <i>spy0277</i>       | <i>spy0277</i>     | 982           | 495            | 839            | 984            |
| SpM1_ChORF0726_s_at  | <i>spy0726</i>       | <i>spy0726</i>     | 561           | 496            | 589            | 535            |
| SpM1_ChORF0926_s_at  | <i>recJ</i>          | <i>spy0926</i>     | 311           | 497            | 470            | 421            |
| SpM1_ChORF1241_s_at  | <i>pstB</i>          | <i>spy1241</i>     | 659           | 498            | 624            | 796            |
| SpM1_ChORF0857_s_at  | <i>mur1.2</i>        | <i>spy0857</i>     | 1209          | 499            | 963            | 961            |
| SpM1_ChORF0457_s_at  | <i>spy0457</i>       | <i>spy0457</i>     | 630           | 500            | 635            | 585            |
| SpM1_ChORF1755_s_at  | <i>spy1755</i>       | <i>spy1755</i>     | 32            | 501            | 501            | 394            |
| SpM1_ChORF1420_s_at  | <i>murF</i>          | <i>spy1420</i>     | 510           | 502            | 614            | 548            |
| SpM1_ChORF1312_s_at  | <i>dltA</i>          | <i>spy1312</i>     | 160           | 503            | 475            | 446            |
| SpM1_ChORF0422_s_at  | <i>metS</i>          | <i>spy0422</i>     | 554           | 504            | 522            | 449            |
| SpM1_ChORF0909_s_at  | <i>parE</i>          | <i>spy0909</i>     | 468           | 505            | 716            | 633            |
| SpM1_ChORF0803_s_at  | <i>cmk</i>           | <i>spy0803</i>     | 375           | 506            | 351            | 341            |
| SpM1_ChORF0263_s_at  | <i>spy0263</i>       | <i>spy0263</i>     | 414           | 507            | 334            | 363            |
| SpM1_ChORF0831_s_at  | <i>pyrP</i>          | <i>spy0831</i>     | 489           | 508            | 576            | 947            |
| SpM1_ChORF1895_s_at  | <i>rpoE</i>          | <i>spy1895</i>     | 832           | 509            | 959            | 1074           |
| SpM1_ChORF0430_at    | <i>spy0430</i>       | <i>spy0430</i>     | 253           | 510            | 215            | 279            |
| SpM1_ChORF1941_s_at  | <i>cysS</i>          | <i>spy1941</i>     | 743           | 511            | 509            | 746            |
| SpM1_ChORF1356_s_at  | <i>spy1356</i>       | <i>spy1356</i>     | 678           | 512            | 537            | 611            |
| SpM1_ChORF1857_s_at  | <i>spy1857</i>       | <i>spy1857</i>     | 1035          | 513            | 804            | 885            |
| SpM1_ChORF2019_s_at  | <i>mga</i>           | <i>spy2019</i>     | 838           | 514            | 618            | 748            |
| SpM1_ChORF0454_s_at  | <i>mtsB</i>          | <i>spy0454</i>     | 705           | 515            | 646            | 657            |
| SpM1_ChORF1094_s_at  | <i>spy1094</i>       | <i>spy1094</i>     | 945           | 516            | 684            | 942            |
| SpM18_ChORF0393_s_at | <i>speA</i>          | <i>spyM18_0393</i> | 976           | 517            | 230            | 132            |
| SpM1_ChORF1689_s_at  | <i>glyQ</i>          | <i>spy1689</i>     | 393           | 518            | 636            | 737            |



| Probe Set Name *         | Gene Name                   | Synonym                     | Rank<br>0 min | Rank<br>30 min | Rank<br>60 min | Rank<br>90 min |
|--------------------------|-----------------------------|-----------------------------|---------------|----------------|----------------|----------------|
| SpM1_ChORF0289_s_at      | <i>nifU, yurV</i>           | <i>spy0289</i>              | 502           | 519            | 692            | 848            |
| SpM1_ChORF0282_s_at      | <i>rgpG</i>                 | <i>spy0282</i>              | 904           | 520            | 683            | 972            |
| SpM1_ChORF1365_s_at      | <i>spy1365</i>              | <i>spy1365</i>              | 497           | 521            | 579            | 634            |
| SpM1_ChORF0866_s_at      | <i>papS</i>                 | <i>spy0866</i>              | 467           | 522            | 458            | 399            |
|                          | <i>spyoM5_ChORF_J7578C</i>  | <i>SpyoM5_ChORF_J7578C</i>  |               |                |                |                |
| SpM5_ChORFJ7578C-5_s_at  | <i>e05.s1c_5</i>            | <i>e05.s1c_5</i>            | 760           | 523            | 928            | 898            |
| SpM1_ChORF0250_x_at      | <i>rpmH</i>                 | <i>spy0250</i>              | 909           | 524            | 512            | 677            |
| SpM1_ChORF0652_s_at      | <i>spy0652</i>              | <i>spy0652</i>              | 408           | 525            | 505            | 544            |
| SpM1_ChORF1192_s_at      | <i>citC</i>                 | <i>spy1192</i>              | 364           | 526            | 381            | 269            |
| SpM1_ChORF0500_s_at      | <i>spy0500</i>              | <i>spy0500</i>              | 290           | 527            | 388            | 377            |
| SpM1_ChORF0738_at        | <i>sagA</i>                 | <i>spy0738</i>              | 492           | 528            | 141            | 65             |
| SpM1_ChORF2000_s_at      | <i>dppA</i>                 | <i>spy2000</i>              | 342           | 529            | 562            | 562            |
| SpM1_ChORF2217_s_at      | <i>spoJ</i>                 | <i>spy2217</i>              | 391           | 530            | 360            | 298            |
| SpM1_ChORF1629_s_at      | <i>priA</i>                 | <i>spy1629</i>              | 373           | 531            | 375            | 360            |
|                          | <i>spyoM5_ChORF_J7578C</i>  | <i>SpyoM5_ChORF_J7578C</i>  |               |                |                |                |
| SpM5_ChORFJ7578C-81_s_at | <i>e05.s1c_81</i>           | <i>e05.s1c_81</i>           | 443           | 532            | 486            | 445            |
| SpM1_ChORF0654_s_at      | <i>spy0654</i>              | <i>spy0654</i>              | 430           | 533            | 553            | 620            |
| SpM1_ChORF0317_s_at      | <i>spy0317</i>              | <i>spy0317</i>              | 232           | 534            | 682            | 711            |
| SpM1_ChORF0374_s_at      | <i>spy0374</i>              | <i>spy0374</i>              | 732           | 535            | 601            | 673            |
| SpM1_ChORF0720_s_at      | <i>spy0720</i>              | <i>spy0720</i>              | 605           | 536            | 496            | 517            |
| SpM1_ChORF0117_s_at      | <i>spy0117</i>              | <i>spy0117</i>              | 1022          | 537            | 1086           | 1252           |
| SpM1_ChORF1621_s_at      | <i>rr03</i>                 | <i>spy1621</i>              | 472           | 538            | 391            | 455            |
| SpM1_ChORF1777_s_at      | <i>codY</i>                 | <i>spy1777</i>              | 568           | 539            | 762            | 715            |
| SpM1_ChORF0948_s_at      | <i>spy0948</i>              | <i>spy0948</i>              | 396           | 540            | 354            | 222            |
| SpM1_ChORF1315_s_at      | <i>glnH</i>                 | <i>spy1315</i>              | 189           | 541            | 826            | 815            |
| SpM1_ChORF0319_s_at      | <i>spy0319</i>              | <i>spy0319</i>              | 694           | 542            | 747            | 784            |
| SpM1_ChORF1302_at        | <i>amyA</i>                 | <i>spy1302</i>              | 169           | 543            | 74             | 24             |
| SpM1_ChORF0616_s_at      | <i>murM</i>                 | <i>spy0616</i>              | 608           | 544            | 689            | 963            |
| SpM1_ChORF1723_s_at      | <i>spy1723</i>              | <i>spy1723</i>              | 401           | 545            | 416            | 302            |
| SpM1_ChORF1515_s_at      | <i>spy1515</i>              | <i>spy1515</i>              | 583           | 546            | 556            | 750            |
| SpM1_ChORF1147_s_at      | <i>pvaA</i>                 | <i>spy1147</i>              | 465           | 547            | 471            | 508            |
| SpM1_ChORF1673_at        | <i>proB</i>                 | <i>spy1672</i>              | 535           | 548            | 423            | 355            |
| SpM1_ChORF0741_s_at      | <i>sagD</i>                 | <i>spy0741</i>              | 474           | 549            | 68             | 55             |
| SpM1_ChORF1498_s_at      | <i>fps</i>                  | <i>spy1498</i>              | 975           | 550            | 525            | 769            |
| SpM1_ChORF0740_s_at      | <i>sagC</i>                 | <i>spy0740</i>              | 507           | 551            | 58             | 48             |
| SpM1_ChORF1695_s_at      | <i>spy1695</i>              | <i>spy1695</i>              | 755           | 552            | 676            | 619            |
| SpM1_ChORF0129_at        | <i>eftLSL.B</i>             | <i>spy0129</i>              | 256           | 553            | 767            | 1459           |
| SpM1_ChORF0262_s_at      | <i>ksgA</i>                 | <i>spy0262</i>              | 684           | 554            | 773            | 452            |
| SpM1_ChORF0164_s_at      | <i>nusG</i>                 | <i>spy0164</i>              | 626           | 555            | 600            | 459            |
| SpM1_ChORF1141_s_at      | <i>prfA</i>                 | <i>spy1141</i>              | 720           | 556            | 827            | 912            |
| SpM1_ChORF1201_s_at      | <i>ylxM</i>                 | <i>spy1201</i>              | 920           | 557            | 937            | 841            |
|                          | <i>spyoM49_ChORF_sp001</i>  | <i>SpyoM49_ChORF_sp001</i>  |               |                |                |                |
| SpM49_ChORF391-1_s_at    | <i>_0_391_1</i>             | <i>_0_391_1</i>             | 383           | 558            | 596            | 649            |
| SpM1_ChORF1216_s_at      | <i>spy1216</i>              | <i>spy1216</i>              | 636           | 559            | 319            | 344            |
| SpM1_ChORF0229_s_at      | <i>spy0229</i>              | <i>spy0229</i>              | 618           | 560            | 472            | 383            |
| SpM1_ChORF0899_s_at      | <i>spy0899</i>              | <i>spy0899</i>              | 677           | 561            | 571            | 578            |
| SpM1_ChORF0794_s_at      | <i>spy0794</i>              | <i>spy0794</i>              | 521           | 562            | 573            | 757            |
| SpM1_ChORF0928_s_at      | <i>dnaD</i>                 | <i>spy0928</i>              | 501           | 563            | 552            | 506            |
| SpM18_ChORF1629_s_at     | <i>spyM18_1629</i>          | <i>spyM18_1629</i>          | 504           | 564            | 542            | 632            |
| SpM1_ChORF1069_s_at      | <i>spy1069</i>              | <i>spy1069</i>              | 412           | 565            | 533            | 469            |
| SpM1_ChORF1820_s_at      | <i>spy1820</i>              | <i>spy1820</i>              | 624           | 566            | 382            | 387            |
| SpM1_ChORF1525_s_at      | <i>murD</i>                 | <i>spy1525</i>              | 587           | 567            | 488            | 540            |
| SpM1_ChORF1353_s_at      | <i>spy1353</i>              | <i>spy1353</i>              | 635           | 568            | 557            | 589            |
| SpM1_ChORF0787_s_at      | <i>rgpBc</i>                | <i>spy0787</i>              | 666           | 569            | 725            | 835            |
| SpM1_ChORF0092_s_at      | <i>adcR</i>                 | <i>spy0092</i>              | 882           | 570            | 787            | 720            |
|                          | <i>spyoM5_ChORF_275f02.</i> | <i>SpyoM5_ChORF_275f02.</i> |               |                |                |                |
| SpM5_ChORF275f-5_s_at    | <i>p1cq_5</i>               | <i>p1cq_5</i>               | 1524          | 571            | 990            | 1185           |
| SpM1_ChORF1375_s_at      | <i>nrdE.2</i>               | <i>spy1375</i>              | 564           | 572            | 879            | 1004           |
| SpM1_ChORF0267_s_at      | <i>cbf</i>                  | <i>spy0267</i>              | 437           | 573            | 367            | 330            |
| SpM1_ChORF0864_s_at      | <i>spy0864</i>              | <i>spy0864</i>              | 660           | 574            | 607            | 641            |
| SpM1_ChORF0281_s_at      | <i>mecA</i>                 | <i>spy0281</i>              | 954           | 575            | 863            | 969            |
| SpM1_ChORF0261_s_at      | <i>spy0261</i>              | <i>spy0261</i>              | 800           | 576            | 821            | 473            |

| Probe Set Name *        | Gene Name                  | Synonym                    | Rank<br>0 min | Rank<br>30 min | Rank<br>60 min | Rank<br>90 min |
|-------------------------|----------------------------|----------------------------|---------------|----------------|----------------|----------------|
| SpM1_ChORF0615_s_at     | <i>murN</i>                | <i>spy0615</i>             | 575           | 577            | 664            | 962            |
| SpM1_ChORF1222_s_at     | <i>dfp</i>                 | <i>spy1222</i>             | 992           | 578            | 581            | 635            |
| SpM1_ChORF0878_s_at     | <i>mvaK2</i>               | <i>spy0878</i>             | 483           | 579            | 637            | 543            |
| SpM1_ChORF0239_s_at     | <i>gltX</i>                | <i>spy0239</i>             | 786           | 580            | 1004           | 1128           |
| SpM1_ChORF0351_s_at     | <i>spy0351</i>             | <i>spy0351</i>             | 477           | 581            | 735            | 639            |
| SpM1_ChORF1845_s_at     | <i>spy1845</i>             | <i>spy1845</i>             | 696           | 582            | 245            | 182            |
| SpM1_ChORF0466_s_at     | <i>msrA.2</i>              | <i>spy0466</i>             | 748           | 583            | 515            | 524            |
| SpM1_ChORF0643_s_at     | <i>prfB</i>                | <i>spy0643</i>             | 505           | 584            | 647            | 572            |
| SpM1_ChORF0397_s_at     | <i>spy0397</i>             | <i>spy0397</i>             | 602           | 585            | 685            | 617            |
| SpM1_ChORF1854_s_at     | <i>glpF.2</i>              | <i>spy1854</i>             | 1146          | 586            | 1139           | 1285           |
| SpM1_ChORF0512_s_at     | <i>spy0512</i>             | <i>spy0512</i>             | 115           | 587            | 222            | 273            |
| SpM49_ChORF8094-24_s_at | <i>spy0037</i>             | <i>spy0037</i>             | 1182          | 588            | 894            | 1037           |
| SpM1_ChORF1657_s_at     | <i>spy1656</i>             | <i>spy1656</i>             | 577           | 589            | 703            | 661            |
| SpM1_ChORF0128_at       | <i>spy0128</i>             | <i>spy0128</i>             | 300           | 590            | 897            | 1484           |
| SpM1_ChORF1568_s_at     | <i>valS</i>                | <i>spy1568</i>             | 446           | 591            | 584            | 669            |
|                         | <i>spyoM12_ChORF_274_1</i> | <i>SpyoM12_ChORF_274_1</i> |               |                |                |                |
| SpM12_ChORF274-19_s_at  | 9                          | 9                          | 616           | 592            | 745            | 704            |
| SpM1_ChORF1120_s_at     | <i>spy1120</i>             | <i>spy1120</i>             | 555           | 593            | 609            | 642            |
| SpM1_ChORF0292_s_at     | <i>dacA</i>                | <i>spy0292</i>             | 990           | 594            | 613            | 823            |
| SpM1_ChORF0173_s_at     | <i>leuS</i>                | <i>spy0173</i>             | 621           | 595            | 658            | 753            |
| SpM1_ChORF0892_s_at     | <i>punA</i>                | <i>spy0892</i>             | 441           | 596            | 566            | 604            |
| SpM1_ChORF1754_s_at     | <i>fabH</i>                | <i>spy1754</i>             | 39            | 597            | 563            | 453            |
| SpM1_ChORF2112_s_at     | <i>spy2112</i>             | <i>spy2112</i>             | 649           | 598            | 445            | 563            |
| SpM1_ChORF0203_s_at     | <i>tgt</i>                 | <i>spy0203</i>             | 701           | 599            | 1111           | 1214           |
| SpM1_ChORF0861_s_at     | <i>mac</i>                 | <i>spy0861</i>             | 1021          | 600            | 819            | 945            |
| SpM1_ChORF0020_s_at     | <i>prsA.2</i>              | <i>spy0020</i>             | 794           | 601            | 968            | 981            |
| SpM1_ChORF0338_s_at     | <i>spy0338</i>             | <i>spy0338</i>             | 641           | 602            | 645            | 759            |
| SpM1_ChORF1333_s_at     | <i>obg</i>                 | <i>spy1333</i>             | 590           | 603            | 814            | 651            |
| SpM12_ChORF265-4_s_at   | <i>spy2037</i>             | <i>spy2037</i>             | 156           | 604            | 421            | 258            |
| SpM1_ChORF1687_s_at     | <i>spy1687</i>             | <i>spy1687</i>             | 395           | 605            | 480            | 555            |
| SpM1_ChORF0362_s_at     | <i>spy0362</i>             | <i>spy0362</i>             | 573           | 606            | 675            | 951            |
| SpM1_ChORF0321_s_at     | <i>spy0321</i>             | <i>spy0321</i>             | 894           | 607            | 656            | 660            |
| SpM1_ChORF0094_s_at     | <i>adcB</i>                | <i>spy0094</i>             | 869           | 608            | 679            | 579            |
| SpM1_ChORF2053_s_at     | <i>spy2053</i>             | <i>spy2053</i>             | 540           | 609            | 166            | 107            |
| SpM1_ChORF0264_s_at     | <i>rpe</i>                 | <i>spy0264</i>             | 522           | 610            | 373            | 371            |
| SpM1_ChORF1100_s_at     | <i>folK</i>                | <i>spy1100</i>             | 289           | 611            | 558            | 603            |
| SpM1_ChORF1658_s_at     | <i>spy1657</i>             | <i>spy1657</i>             | 612           | 612            | 743            | 723            |
| SpM1_ChORF2188_s_at     | <i>trmU</i>                | <i>spy2188</i>             | 848           | 613            | 876            | 787            |
| SpM1_ChORF1735_s_at     | <i>spy1735</i>             | <i>spy1735</i>             | 1015          | 614            | 782            | 646            |
| SpM1_ChORF0127_at       | <i>spy0127</i>             | <i>spy0127</i>             | 369           | 615            | 1108           | 1534           |
| SpM1_ChORF1524_s_at     | <i>murG</i>                | <i>spy1524</i>             | 546           | 616            | 551            | 560            |
| SpM1_ChORF2210_s_at     | <i>spy2210</i>             | <i>spy2210</i>             | 908           | 617            | 996            | 1325           |
| SpM1_ChORF0507_s_at     | <i>spy0507</i>             | <i>spy0507</i>             | 764           | 618            | 749            | 870            |
| SpM1_ChORF1393_s_at     | <i>pepB</i>                | <i>spy1393</i>             | 494           | 619            | 580            | 500            |
|                         | <i>spyoM12_ChORF_272_9</i> | <i>SpyoM12_ChORF_272_9</i> |               |                |                |                |
| SpM12_ChORF272-9_s_at   |                            |                            | 614           | 620            | 494            | 380            |
| SpM1_ChORF1506_s_at     | <i>spy1506</i>             | <i>spy1506</i>             | 1355          | 621            | 751            | 794            |
| SpM1_ChORF1726_s_at     | <i>spy1726</i>             | <i>spy1726</i>             | 956           | 622            | 739            | 1026           |
| SpM1_ChORF0278_s_at     | <i>spy0278</i>             | <i>spy0278</i>             | 425           | 623            | 528            | 538            |
| SpM1_ChORF0816_s_at     | <i>nifS, yrvO</i>          | <i>spy0816</i>             | 856           | 624            | 932            | 937            |
| SpM12_ChORF266-14_s_at  | <i>spy0580</i>             | <i>spy0580</i>             | 1036          | 625            | 958            | 1002           |
| SpM1_ChORF1368_s_at     | <i>udk</i>                 | <i>spy1368</i>             | 1196          | 626            | 1129           | 1169           |
| SpM1_ChORF1842_s_at     | <i>spi</i>                 | <i>spy1842</i>             | 828           | 627            | 776            | 865            |
| SpM1_ChORF0190_s_at     | <i>spy0190</i>             | <i>spy0190</i>             | 607           | 628            | 435            | 263            |
| SpM1_ChORF1858_s_at     | <i>pepXP</i>               | <i>spy1858</i>             | 1155          | 629            | 740            | 808            |
| SpM1_ChORF0115_s_at     | <i>pepA</i>                | <i>spy0115</i>             | 726           | 630            | 731            | 722            |
| SpM1_ChORF1798_s_at     | <i>spy1798</i>             | <i>spy1798</i>             | 394           | 631            | 659            | 616            |
| SpM1_ChORF0305_s_at     | <i>spy0305</i>             | <i>spy0305</i>             | 919           | 632            | 891            | 894            |
| SpM1_ChORF1139_at       | <i>spy1139</i>             | <i>spy1139</i>             | 967           | 633            | 939            | 1065           |
| SpM18_ChORF1666_s_at    | <i>trxB</i>                | <i>spyM18_1666</i>         | 686           | 634            | 718            | 652            |
| SpM1_ChORF1173_s_at     | <i>gid</i>                 | <i>spy1173</i>             | 895           | 635            | 756            | 726            |
| SpM18_ChORF0196_s_at    | <i>spyM18_0196</i>         | <i>spyM18_0196</i>         | 515           | 636            | 761            | 914            |

| Probe Set Name *         | Gene Name                 | Synonym                   | Rank<br>0 min | Rank<br>30 min | Rank<br>60 min | Rank<br>90 min |
|--------------------------|---------------------------|---------------------------|---------------|----------------|----------------|----------------|
| SpM1_ChORF0201_s_at      | <i>spy0201</i>            | <i>spy0201</i>            | 810           | 637            | 572            | 545            |
| SpM1_ChORF2154_s_at      | <i>spy2154</i>            | <i>spy2154</i>            | 759           | 638            | 544            | 582            |
| SpM1_ChORF2191_s_at      | <i>sceD</i>               | <i>spy2191</i>            | 1025          | 639            | 898            | 727            |
| SpM1_ChORF0290_s_at      | <i>spy0290</i>            | <i>spy0290</i>            | 688           | 640            | 857            | 952            |
| SpM1_ChORF1940_s_at      | <i>spy1940</i>            | <i>spy1940</i>            | 770           | 641            | 631            | 850            |
| SpM1_ChORF1401_s_at      | <i>spy1401</i>            | <i>spy1401</i>            | 766           | 642            | 848            | 838            |
| SpM1_ChORF1218_s_at      | <i>spy1218</i>            | <i>spy1218</i>            | 648           | 643            | 442            | 518            |
| SpM12_ChORF263-13_s_at   | <i>asnS</i>               | <i>spy0651</i>            | 934           | 644            | 852            | 906            |
| SpM1_ChORF2148_s_at      | <i>mutS</i>               | <i>spy2148</i>            | 1066          | 645            | 668            | 629            |
| SpM1_ChORF0807_s_at      | <i>spy0807</i>            | <i>spy0807</i>            | 695           | 646            | 991            | 1158           |
| SpM1_ChORF0323_s_at      | <i>braB</i>               | <i>spy0323</i>            | 1311          | 647            | 853            | 743            |
| SpM1_ChORF1196_s_at      | <i>spy1196</i>            | <i>spy1196</i>            | 484           | 648            | 514            | 370            |
| SpM1_ChORF0363_s_at      | <i>spy0363</i>            | <i>spy0363</i>            | 541           | 649            | 734            | 990            |
| SpM1_ChORF1693_s_at      | <i>spy1693</i>            | <i>spy1693</i>            | 216           | 650            | 153            | 130            |
| SpM1_ChORF1866_s_at      | <i>spy1866</i>            | <i>spy1866</i>            | 867           | 651            | 660            | 576            |
| SpM18_ChORF0013_s_at     | <i>hpt</i>                | <i>spyM18_0013</i>        | 776           | 652            | 938            | 893            |
| SpM1_ChORF0529_s_at      | <i>vicK</i>               | <i>spy0529</i>            | 596           | 653            | 728            | 846            |
| SpM1_ChORF0587_s_at      | <i>spy0587</i>            | <i>spy0587</i>            | 512           | 654            | 521            | 570            |
| SpM1_ChORF1828_s_at      | <i>spy1828</i>            | <i>spy1828</i>            | 1129          | 655            | 1120           | 1202           |
| SpM3_ChORF0884_s_at      | <i>spyM3_0884</i>         | <i>SpyM3_0884</i>         | 744           | 656            | 680            | 833            |
| SpM1_ChORF1055_s_at      | <i>csrA</i>               | <i>spy1055</i>            | 550           | 657            | 633            | 528            |
| SpM1_ChORF0749_s_at      | <i>spy0749</i>            | <i>spy0749</i>            | 1124          | 658            | 538            | 413            |
| SpM1_ChORF1492_s_at      | <i>spy1492</i>            | <i>spy1492</i>            | 658           | 659            | 672            | 749            |
|                          | <i>spyoM5_ChORF_BAC16</i> | <i>SpyoM5_ChORF_BAC16</i> |               |                |                |                |
| SpM5_ChORF-b16C31-7_s_at | <i>C3.00001_7</i>         | <i>C3.00001_7</i>         | 513           | 660            | 519            | 417            |
| SpM1_ChORF1818_s_at      | <i>nusB</i>               | <i>spy1818</i>            | 634           | 661            | 403            | 409            |
| SpM1_ChORF0596_s_at      | <i>spy0596</i>            | <i>spy0596</i>            | 1032          | 662            | 992            | 1181           |
| SpM1_ChORF2196_s_at      | <i>pgsA</i>               | <i>spy2196</i>            | 952           | 663            | 972            | 1127           |
| SpM1_ChORF1369_s_at      | <i>deaD2</i>              | <i>spy1369</i>            | 458           | 664            | 539            | 423            |
| SpM1_ChORF0889_s_at      | <i>rpiA</i>               | <i>spy0889</i>            | 578           | 665            | 752            | 745            |
| SpM1_ChORF0388_s_at      | <i>murE</i>               | <i>spy0388</i>            | 523           | 666            | 957            | 993            |
| SpM1_ChORF0931_s_at      | <i>spy0931</i>            | <i>spy0931</i>            | 690           | 667            | 757            | 697            |
| SpM1_ChORF1193_s_at      | <i>spy1193</i>            | <i>spy1193</i>            | 589           | 668            | 568            | 428            |
| SpM1_ChORF1012_s_at      | <i>spy1012</i>            | <i>spy1012</i>            | 718           | 669            | 588            | 817            |
| SpM1_ChORF0814_s_at      | <i>folC.2</i>             | <i>spy0814</i>            | 562           | 670            | 900            | 1072           |
| SpM1_ChORF0827_s_at      | <i>spy0827</i>            | <i>spy0827</i>            | 697           | 671            | 807            | 828            |
| SpM1_ChORF0790_s_at      | <i>rgpDc</i>              | <i>spy0790</i>            | 673           | 672            | 798            | 940            |
| SpM1_ChORF2185_s_at      | <i>gidA</i>               | <i>spy2185</i>            | 929           | 673            | 811            | 765            |
| SpM1_ChORF2149_s_at      | <i>spy2149</i>            | <i>spy2149</i>            | 1047          | 674            | 840            | 874            |
| SpM1_ChORF0852_s_at      | <i>apbA</i>               | <i>spy0852</i>            | 518           | 675            | 918            | 1016           |
| SpM1_ChORF2104_s_at      | <i>spy2104</i>            | <i>spy2104</i>            | 1003          | 676            | 980            | 976            |
| SpM1_ChORF1851_s_at      | <i>cppA</i>               | <i>spy1851</i>            | 730           | 677            | 1026           | 903            |
| SpM1_ChORF1343_s_at      | <i>spy1343</i>            | <i>spy1343</i>            | 588           | 678            | 1109           | 1188           |
| SpM1_ChORF0463_s_at      | <i>rrf</i>                | <i>spy0463</i>            | 679           | 679            | 831            | 809            |
| SpM1_ChORF0895_s_at      | <i>cpsX</i>               | <i>spy0895</i>            | 584           | 680            | 592            | 637            |
| SpM1_ChORF1068_s_at      | <i>uvrC</i>               | <i>spy1068</i>            | 379           | 681            | 460            | 381            |
| SpM1_ChORF0601_s_at      | <i>spy0601</i>            | <i>spy0601</i>            | 756           | 682            | 875            | 866            |
| SpM1_ChORF0916_s_at      | <i>spy0916</i>            | <i>spy0916</i>            | 700           | 683            | 673            | 461            |
| SpM1_ChORF1571_s_at      | <i>spy1571</i>            | <i>spy1571</i>            | 1170          | 684            | 1025           | 1133           |
| SpM1_ChORF2059_s_at      | <i>pbp2A</i>              | <i>spy2059</i>            | 340           | 685            | 746            | 840            |
| SpM1_ChORF1099_s_at      | <i>folQ</i>               | <i>spy1099</i>            | 280           | 686            | 599            | 656            |
| SpM1_ChORF0530_s_at      | <i>vicX</i>               | <i>spy0530</i>            | 715           | 687            | 783            | 853            |
| SpM1_ChORF0399_s_at      | <i>tmk</i>                | <i>spy0399</i>            | 680           | 688            | 583            | 550            |
| SpM1_ChORF1729_s_at      | <i>spy1729</i>            | <i>spy1729</i>            | 1016          | 689            | 772            | 1020           |
| SpM1_ChORF0327_s_at      | <i>ntpJ</i>               | <i>spy0327</i>            | 860           | 690            | 836            | 964            |
| SpM1_ChORF0799_s_at      | <i>pepT</i>               | <i>spy0799</i>            | 397           | 691            | 370            | 291            |
| SpM1_ChORF1714_s_at      | <i>copZ</i>               | <i>spy1714</i>            | 676           | 692            | 452            | 320            |
| SpM1_ChORF0811_s_at      | <i>spy0811</i>            | <i>spy0811</i>            | 796           | 693            | 820            | 740            |
| SpM1_ChORF2055_s_at      | <i>spy2055</i>            | <i>spy2055</i>            | 733           | 694            | 94             | 143            |
| SpM1_ChORF0112_s_at      | <i>proC</i>               | <i>spy0112</i>            | 685           | 695            | 733            | 689            |
| SpM1_ChORF1827_s_at      | <i>spy1827</i>            | <i>spy1827</i>            | 1143          | 696            | 1246           | 1323           |
| SpM1_ChORF1219_s_at      | <i>spy1219</i>            | <i>spy1219</i>            | 674           | 697            | 484            | 588            |

| Probe Set Name *        | Gene Name                                       | Synonym            | Rank<br>0 min | Rank<br>30 min | Rank<br>60 min | Rank<br>90 min |
|-------------------------|-------------------------------------------------|--------------------|---------------|----------------|----------------|----------------|
| SpM1_ChORF1275_s_at     | <i>spy1275</i>                                  | <i>spy1275</i>     | 1001          | 698            | 755            | 760            |
| SpM1_ChORF0925_s_at     | <i>spy0925</i>                                  | <i>spy0925</i>     | 530           | 699            | 721            | 624            |
| SpM1_ChORF1528_s_at     | <i>spy1528</i>                                  | <i>spy1528</i>     | 729           | 700            | 449            | 552            |
| SpM1_ChORF0528_s_at     | <i>vicR</i>                                     | <i>spy0528</i>     | 619           | 701            | 754            | 908            |
| SpM1_ChORF1244_s_at     | <i>pstC2</i>                                    | <i>spy1244</i>     | 782           | 702            | 833            | 968            |
| SpM1_ChORF0210_s_at     | <i>spy0210</i>                                  | <i>spy0210</i>     | 500           | 703            | 693            | 529            |
| SpM1_ChORF1102_s_at     | <i>potA</i>                                     | <i>spy1102</i>     | 841           | 704            | 884            | 820            |
| SpM1_ChORF1581_s_at     | <i>spy1581</i>                                  | <i>spy1581</i>     | 569           | 705            | 697            | 700            |
| SpM1_ChORF0158_s_at     | <i>spy0158</i>                                  | <i>spy0158</i>     | 411           | 706            | 491            | 584            |
| SpM1_ChORF0751_s_at     | <i>lig</i>                                      | <i>spy0751</i>     | 498           | 707            | 944            | 971            |
| SpM1_ChORF1694_s_at     | <i>nagA</i>                                     | <i>spy1694</i>     | 318           | 708            | 397            | 225            |
| SpM1_ChORF1802_s_at     | <i>alr</i>                                      | <i>spy1802</i>     | 552           | 709            | 547            | 392            |
| SpM1_ChORF1126_s_at     | <i>spy1126</i>                                  | <i>spy1126</i>     | 893           | 710            | 917            | 926            |
| SpM1_ChORF1033_s_at     | <i>lplB</i>                                     | <i>spy1033</i>     | 1123          | 711            | 1080           | 1190           |
| SpM1_ChORF1869_s_at     | <i>udp</i>                                      | <i>spy1869</i>     | 528           | 712            | 344            | 252            |
| SpM1_ChORF0653_s_at     | <i>spy0653</i>                                  | <i>spy0653</i>     | 560           | 713            | 663            | 678            |
|                         | <i>spyoM5_ChORF_270b10. SpyoM5_ChORF_270b10</i> |                    |               |                |                |                |
| SpM5_ChORF270b-538_s_at | <i>p1t_538</i>                                  | <i>.p1t_538</i>    | 840           | 714            | 1074           | 1231           |
| SpM18_ChORF1663_s_at    | <i>spyM18_1663</i>                              | <i>spyM18_1663</i> | 876           | 715            | 602            | 583            |
| SpM1_ChORF0818_s_at     | <i>capA</i>                                     | <i>spy0818</i>     | 287           | 716            | 492            | 350            |
| SpM1_ChORF0260_s_at     | <i>spy0260</i>                                  | <i>spy0260</i>     | 932           | 717            | 913            | 559            |
| SpM12_ChORF205-1_s_at   | <i>spy0746</i>                                  | <i>spy0746</i>     | 818           | 718            | 171            | 93             |
| SpM1_ChORF1675_s_at     | <i>spy1675</i>                                  | <i>spy1675</i>     | 825           | 719            | 719            | 675            |
| SpM5_ChORF125g-81_s_at  | <i>spy2054</i>                                  | <i>spy2054</i>     | 642           | 720            | 191            | 133            |
| SpM1_ChORF1243_s_at     | <i>pstC</i>                                     | <i>spy1243</i>     | 740           | 721            | 758            | 875            |
| SpM1_ChORF1248_s_at     | <i>spy1248</i>                                  | <i>spy1248</i>     | 790           | 722            | 727            | 878            |
| SpM1_ChORF2207_s_at     | <i>trsA/trpA</i>                                | <i>spy2207</i>     | 950           | 723            | 666            | 1077           |
| SpM1_ChORF0841_s_at     | <i>spy0841</i>                                  | <i>spy0841</i>     | 772           | 724            | 888            | 812            |
|                         | <i>spyoM5_ChORF_270b10. SpyoM5_ChORF_270b10</i> |                    |               |                |                |                |
| SpM5_ChORF270b-433_s_at | <i>p1t_433</i>                                  | <i>.p1t_433</i>    | 905           | 725            | 851            | 834            |
| SpM1_ChORF2155_s_at     | <i>spy2155</i>                                  | <i>spy2155</i>     | 953           | 726            | 723            | 819            |
| SpM1_ChORF1119_s_at     | <i>spy1119</i>                                  | <i>spy1119</i>     | 723           | 727            | 799            | 676            |
| SpM1_ChORF1128_s_at     | <i>pta</i>                                      | <i>spy1128</i>     | 336           | 728            | 540            | 486            |
| SpM1_ChORF1983_s_at     | <i>sclA</i>                                     | <i>spy1983</i>     | 974           | 729            | 796            | 1051           |
| SpM1_ChORF1202_s_at     | <i>spy1202</i>                                  | <i>spy1202</i>     | 961           | 730            | 974            | 930            |
| SpM1_ChORF0922_s_at     | <i>spy0922</i>                                  | <i>spy0922</i>     | 654           | 731            | 795            | 696            |
| SpM3_ChORF0820_s_at     | <i>topA</i>                                     | <i>spy1164</i>     | 609           | 732            | 903            | 907            |
| SpM1_ChORF0838_s_at     | <i>spy0838</i>                                  | <i>spy0838</i>     | 595           | 733            | 405            | 490            |
| SpM1_ChORF1984_s_at     | <i>nrdI.1</i>                                   | <i>spy1984</i>     | 725           | 734            | 952            | 950            |
| SpM1_ChORF0450_s_at     | <i>scaR</i>                                     | <i>spy0450</i>     | 450           | 735            | 605            | 691            |
| SpM1_ChORF0400_s_at     | <i>dnaX</i>                                     | <i>spy0400</i>     | 647           | 736            | 594            | 531            |
| SpM1_ChORF1725_s_at     | <i>spy1725</i>                                  | <i>spy1725</i>     | 570           | 737            | 549            | 422            |
| SpM1_ChORF1352_s_at     | <i>aroA</i>                                     | <i>spy1352</i>     | 582           | 738            | 524            | 466            |
| SpM1_ChORF1236_s_at     | <i>ciaH</i>                                     | <i>spy1236</i>     | 503           | 739            | 736            | 719            |
| SpM1_ChORF2074_s_at     | <i>ctsR</i>                                     | <i>spy2074</i>     | 622           | 740            | 760            | 605            |
| SpM1_ChORF1220_s_at     | <i>spy1220</i>                                  | <i>spy1220</i>     | 708           | 741            | 513            | 653            |
| SpM1_ChORF1829_s_at     | <i>rpsR</i>                                     | <i>spy1829</i>     | 665           | 742            | 812            | 747            |
| SpM1_ChORF0755_s_at     | <i>atpB</i>                                     | <i>spy0755</i>     | 632           | 743            | 1018           | 1146           |
| SpM1_ChORF0762_s_at     | <i>spy0762</i>                                  | <i>spy0762</i>     | 873           | 744            | 868            | 909            |
| SpM18_ChORF1197_s_at    | <i>spyM18_1197</i>                              | <i>spyM18_1197</i> | 839           | 745            | 784            | 925            |
| SpM1_ChORF0797_s_at     | <i>amrA</i>                                     | <i>spy0797</i>     | 689           | 746            | 699            | 744            |
| SpM1_ChORF2060_s_at     | <i>spy2060</i>                                  | <i>spy2060</i>     | 591           | 747            | 730            | 1022           |
| SpM1_ChORF1699_s_at     | <i>spy1699</i>                                  | <i>spy1699</i>     | 989           | 748            | 911            | 900            |
| SpM1_ChORF0470_s_at     | <i>spy0470</i>                                  | <i>spy0470</i>     | 281           | 749            | 456            | 368            |
| SpM1_ChORF1301_s_at     | <i>malC</i>                                     | <i>spy1301</i>     | 366           | 750            | 155            | 36             |
| SpM1_ChORF0506_s_at     | <i>pcp</i>                                      | <i>spy0506</i>     | 795           | 751            | 704            | 695            |
| SpM1_ChORF1646_s_at     | <i>spy1646</i>                                  | <i>spy1646</i>     | 878           | 752            | 927            | 935            |
| SpM1_ChORF0316_s_at     | <i>spy0316</i>                                  | <i>spy0316</i>     | 822           | 753            | 1012           | 1201           |
| SpM1_ChORF0784_s_at     | <i>rmlD</i>                                     | <i>spy0784</i>     | 606           | 754            | 765            | 625            |
| SpM1_ChORF1779_s_at     | <i>spy1779</i>                                  | <i>spy1779</i>     | 645           | 755            | 1027           | 953            |
| SpM1_ChORF1871_s_at     | <i>rpsN2</i>                                    | <i>spy1871</i>     | 1020          | 756            | 886            | 739            |
| SpM1_ChORF0567_s_at     | <i>spy0567</i>                                  | <i>spy0567</i>     | 855           | 757            | 638            | 829            |

| Probe Set Name *       | Gene Name                  | Synonym                    | Rank<br>0 min | Rank<br>30 min | Rank<br>60 min | Rank<br>90 min |
|------------------------|----------------------------|----------------------------|---------------|----------------|----------------|----------------|
| SpM1_ChORF1071_s_at    | <i>thdF</i>                | <i>spy1071</i>             | 1171          | 758            | 1083           | 1027           |
| SpM1_ChORF0159_s_at    | <i>spy0159</i>             | <i>spy0159</i>             | 567           | 759            | 691            | 807            |
| SpM1_ChORF1971_s_at    | <i>spy1971</i>             | <i>spy1971</i>             | 687           | 760            | 802            | 904            |
| SpM1_ChORF0739_s_at    | <i>sagB</i>                | <i>spy0739</i>             | 671           | 761            | 115            | 92             |
| SpM1_ChORF0163_s_at    | <i>spy0163</i>             | <i>spy0163</i>             | 803           | 762            | 803            | 775            |
| SpM1_ChORF1232_s_at    | <i>spy1232</i>             | <i>spy1232</i>             | 1363          | 763            | 1229           | 1405           |
| SpM1_ChORF0793_s_at    | <i>spy0793</i>             | <i>spy0793</i>             | 650           | 764            | 806            | 965            |
| SpM1_ChORF0621_s_at    | <i>spy0621</i>             | <i>spy0621</i>             | 1012          | 765            | 1118           | 1180           |
| SpM1_ChORF0777_s_at    | <i>rexA</i>                | <i>spy0777</i>             | 545           | 766            | 738            | 843            |
| SpM1_ChORF1134_s_at    | <i>proWX</i>               | <i>spy1134</i>             | 667           | 767            | 785            | 692            |
| SpM1_ChORF1272_s_at    | <i>spy1272</i>             | <i>spy1272</i>             | 837           | 768            | 789            | 708            |
| SpM1_ChORF1274_s_at    | <i>spy1274</i>             | <i>spy1274</i>             | 1013          | 769            | 830            | 882            |
| SpM1_ChORF0003_s_at    | <i>dnaN</i>                | <i>spy0003</i>             | 835           | 770            | 593            | 859            |
| SpM1_ChORF0346_s_at    | <i>spy0346</i>             | <i>spy0346</i>             | 757           | 771            | 686            | 596            |
| SpM1_ChORF1538_s_at    | <i>spy1538</i>             | <i>spy1538</i>             | 926           | 772            | 1021           | 1071           |
| SpM1_ChORF0208_s_at    | <i>spy0208</i>             | <i>spy0208</i>             | 817           | 773            | 981            | 1207           |
| SpM1_ChORF1223_s_at    | <i>spy1223</i>             | <i>spy1223</i>             | 1328          | 774            | 763            | 816            |
| SpM1_ChORF1025_s_at    | <i>spy1025</i>             | <i>spy1025</i>             | 907           | 775            | 750            | 801            |
| SpM1_ChORF1833_s_at    | <i>mutY</i>                | <i>spy1833</i>             | 775           | 776            | 1147           | 1140           |
| SpM1_ChORF1491_s_at    | <i>spy1491</i>             | <i>spy1491</i>             | 722           | 777            | 732            | 758            |
| SpM1_ChORF0568_s_at    | <i>spy0568</i>             | <i>spy0568</i>             | 819           | 778            | 628            | 712            |
| SpM1_ChORF1849_s_at    | <i>pfl</i>                 | <i>spy1849</i>             | 190           | 779            | 192            | 294            |
| SpM18_ChORF0632_s_at   | <i>spyM18_0632</i>         | <i>spyM18_0632</i>         | 631           | 780            | 510            | 505            |
| SpM1_ChORF1806_s_at    | <i>spy1806</i>             | <i>spy1806</i>             | 362           | 781            | 608            | 431            |
| SpM1_ChORF0285_s_at    | <i>spy0285</i>             | <i>spy0285</i>             | 797           | 782            | 1158           | 1187           |
| SpM1_ChORF1642_s_at    | <i>luxS</i>                | <i>spy1642</i>             | 761           | 783            | 768            | 767            |
| SpM1_ChORF0908_s_at    | <i>spy0908</i>             | <i>spy0908</i>             | 1251          | 784            | 910            | 949            |
| SpM1_ChORF1284_s_at    | <i>dnaE</i>                | <i>spy1284</i>             | 537           | 785            | 710            | 762            |
| SpM1_ChORF1823_s_at    | <i>comEB</i>               | <i>spy1823</i>             | 657           | 786            | 667            | 521            |
| SpM1_ChORF0873_s_at    | <i>spy0873</i>             | <i>spy0873</i>             | 735           | 787            | 653            | 751            |
| SpM1_ChORF0436_s_at    | <i>speJ</i>                | <i>spy0436</i>             | 1166          | 788            | 1034           | 1152           |
| SpM1_ChORF1535_s_at    | <i>spy1535</i>             | <i>spy1535</i>             | 793           | 789            | 705            | 782            |
| SpM1_ChORF0456_s_at    | <i>mtsC</i>                | <i>spy0456</i>             | 965           | 790            | 862            | 915            |
| SpM1_ChORF0508_s_at    | <i>spy0508</i>             | <i>spy0508</i>             | 1000          | 791            | 1014           | 1170           |
| SpM1_ChORF1873_s_at    | <i>spy1873</i>             | <i>spy1873</i>             | 940           | 792            | 1068           | 1193           |
| SpM1_ChORF1939_s_at    | <i>spy1939</i>             | <i>spy1939</i>             | 843           | 793            | 902            | 1104           |
| SpM1_ChORF0714_s_at    | <i>adcA</i>                | <i>spy0714</i>             | 644           | 794            | 1047           | 933            |
| SpM1_ChORF1140_s_at    | <i>tdk2</i>                | <i>spy1140</i>             | 1147          | 795            | 1089           | 1166           |
| SpM12_ChORF299-12_at   | <i>spyoM12_ChORF_299_1</i> | <i>SpyoM12_ChORF_299_1</i> | 1236          | 796            | 625            | 717            |
| SpM1_ChORF2121_s_at    | <i>mutL</i>                | <i>spy2121</i>             | 773           | 797            | 809            | 881            |
| SpM12_ChORF286-3_s_at  | <i>spyoM12_ChORF_286_3</i> | <i>SpyoM12_ChORF_286_3</i> | 831           | 798            | 838            | 924            |
| SpM12_ChORF300-26_s_at | <i>spyoM12_ChORF_300_2</i> | <i>SpyoM12_ChORF_300_2</i> | 960           | 799            | 942            | 929            |
| SpM1_ChORF1516_s_at    | 6                          | 6                          | 897           | 800            | 889            | 1117           |
| SpM1_ChORF1622_s_at    | <i>spy1516</i>             | <i>spy1516</i>             | 826           | 801            | 694            | 776            |
| SpM1_ChORF0929_s_at    | <i>hk03</i>                | <i>spy1622</i>             | 721           | 802            | 854            | 790            |
| SpM1_ChORF0609_s_at    | <i>nth</i>                 | <i>spy0929</i>             | 805           | 803            | 1043           | 1007           |
| SpM1_ChORF0876_s_at    | <i>ftsW</i>                | <i>spy0609</i>             | 765           | 804            | 882            | 755            |
| SpM1_ChORF0473_s_at    | <i>mvaK1</i>               | <i>spy0876</i>             | 742           | 805            | 842            | 911            |
| SpM1_ChORF2150_s_at    | <i>dgk</i>                 | <i>spy0473</i>             | 1163          | 806            | 926            | 991            |
| SpM1_ChORF2204_s_at    | <i>ahrC</i>                | <i>spy2150</i>             | 613           | 807            | 1013           | 1087           |
| SpM1_ChORF0230_s_at    | <i>recF</i>                | <i>spy2204</i>             | 885           | 808            | 711            | 561            |
| SpM1_ChORF1267_s_at    | <i>spy0230</i>             | <i>spy0230</i>             | 706           | 809            | 1028           | 922            |
| SpM1_ChORF1569_s_at    | <i>pcrA</i>                | <i>spy1267</i>             | 842           | 810            | 1042           | 974            |
| SpM1_ChORF1670_s_at    | <i>spy1569</i>             | <i>spy1569</i>             | 853           | 811            | 801            | 810            |
| SpM1_ChORF1825_s_at    | <i>spy1666</i>             | <i>spy1666</i>             | 499           | 812            | 671            | 622            |
| SpM1_ChORF0874_s_at    | <i>uvrA</i>                | <i>spy1825</i>             | 724           | 813            | 642            | 680            |
| SpM1_ChORF0606_s_at    | <i>spy0874</i>             | <i>spy0874</i>             | 979           | 814            | 890            | 1135           |
| SpM1_ChORF1959_s_at    | <i>pepF</i>                | <i>spy0606</i>             | 593           | 815            | 550            | 485            |
| SpM1_ChORF1919_s_at    | <i>spy1959</i>             | <i>spy1959</i>             | 186           | 816            | 597            | 367            |
|                        | <i>lacD.2</i>              | <i>spy1919</i>             |               |                |                |                |

| Probe Set Name *          | Gene Name                  | Synonym                    | Rank<br>0 min | Rank<br>30 min | Rank<br>60 min | Rank<br>90 min |
|---------------------------|----------------------------|----------------------------|---------------|----------------|----------------|----------------|
| SpM1_ChORF0458_s_at       | <i>spy0458</i>             | <i>spy0458</i>             | 888           | 817            | 954            | 798            |
| SpM1_ChORF0377_s_at       | <i>spy0377</i>             | <i>spy0377</i>             | 754           | 818            | 729            | 674            |
| SpM1_ChORF1839_s_at       | <i>spy1839</i>             | <i>spy1839</i>             | 1215          | 819            | 995            | 1093           |
| SpM1_ChORF1722_s_at       | <i>spy1722</i>             | <i>spy1722</i>             | 598           | 820            | 585            | 424            |
| SpM1_ChORF0342_s_at       | <i>snf</i>                 | <i>spy0342</i>             | 646           | 821            | 712            | 690            |
| SpM1_ChORF0265_s_at       | <i>spy0265</i>             | <i>spy0265</i>             | 714           | 822            | 610            | 564            |
| SpM1_ChORF1745_s_at       | <i>accC</i>                | <i>spy1745</i>             | 38            | 823            | 778            | 507            |
| SpM1_ChORF1310_s_at       | <i>dltC</i>                | <i>spy1310</i>             | 454           | 824            | 744            | 574            |
| SpM1_ChORF0792_s_at       | <i>rgpFc</i>               | <i>spy0792</i>             | 752           | 825            | 883            | 1023           |
| SpM1_ChORF1992_s_at       | <i>spy1992</i>             | <i>spy1992</i>             | 693           | 826            | 701            | 591            |
| SpM1_ChORF1314_s_at       | <i>uvrB</i>                | <i>spy1314</i>             | 327           | 827            | 859            | 781            |
| SpM1_ChORF1850_s_at       | <i>spy1850</i>             | <i>spy1850</i>             | 899           | 828            | 1136           | 1068           |
| SpM1_ChORF1978_s_at       | <i>lrp</i>                 | <i>spy1978</i>             | 1055          | 829            | 841            | 847            |
| SpM18_ChORF0119_s_at      | <i>pheT1</i>               | <i>spyM18_0119</i>         | 1039          | 830            | 1138           | 1294           |
| SpM1_ChORF1308_s_at       | <i>spy1308</i>             | <i>spy1308</i>             | 527           | 831            | 766            | 567            |
| SpM1_ChORF1306_at         | <i>malX</i>                | <i>spy1306</i>             | 275           | 832            | 89             | 86             |
|                           | <i>spyoM5_ChORF_J7578C</i> | <i>SpyoM5_ChORF_J7578C</i> |               |                |                |                |
| SpM5_ChORFJ7578C-152_s_at | <i>e05.s1c_152</i>         | <i>e05.s1c_152</i>         | 579           | 833            | 623            | 608            |
| SpM1_ChORF1572_s_at       | <i>spy1572</i>             | <i>spy1572</i>             | 1270          | 834            | 1171           | 1257           |
| SpM1_ChORF0410_s_at       | <i>spy0410</i>             | <i>spy0410</i>             | 1180          | 835            | 771            | 825            |
| SpM18_ChORF0043_s_at      | <i>purK</i>                | <i>spyM18_0043</i>         | 381           | 836            | 1222           | 1012           |
| SpM1_ChORF1904_s_at       | <i>hsdR</i>                | <i>spy1904</i>             | 861           | 837            | 713            | 756            |
| SpM1_ChORF1510_s_at       | <i>mutT</i>                | <i>spy1510</i>             | 736           | 838            | 698            | 513            |
| SpM1_ChORF0405_s_at       | <i>spy0405</i>             | <i>spy0405</i>             | 816           | 839            | 793            | 730            |
| SpM1_ChORF1400_s_at       | <i>queA</i>                | <i>spy1400</i>             | 1111          | 840            | 1106           | 1103           |
| SpM18_ChORF0630_s_at      | <i>spyM18_0630</i>         | <i>spyM18_0630</i>         | 669           | 841            | 626            | 565            |
| SpM1_ChORF0791_s_at       | <i>rgpEc</i>               | <i>spy0791</i>             | 779           | 842            | 951            | 1091           |
| SpM1_ChORF1918_s_at       | <i>lacF</i>                | <i>spy1918</i>             | 206           | 843            | 629            | 404            |
| SpM1_ChORF0849_s_at       | <i>trmD</i>                | <i>spy0849</i>             | 1103          | 844            | 1207           | 1228           |
| SpM1_ChORF2194_s_at       | <i>spy2194</i>             | <i>spy2194</i>             | 1096          | 845            | 998            | 1025           |
| SpM1_ChORF1961_s_at       | <i>poiC</i>                | <i>spy1961</i>             | 558           | 846            | 770            | 724            |
| SpM1_ChORF1513_s_at       | <i>ileS</i>                | <i>spy1513</i>             | 791           | 847            | 880            | 860            |
| SpM1_ChORF0326_s_at       | <i>spy0326</i>             | <i>spy0326</i>             | 964           | 848            | 1010           | 1145           |
| SpM1_ChORF1963_s_at       | <i>spy1963</i>             | <i>spy1963</i>             | 783           | 849            | 881            | 869            |
| SpM1_ChORF0441_s_at       | <i>spy0441</i>             | <i>spy0441</i>             | 294           | 850            | 759            | 783            |
| SpM1_ChORF1032_s_at       | <i>hylA</i>                | <i>spy1032</i>             | 901           | 851            | 817            | 822            |
| SpM1_ChORF1304_at         | <i>amyB</i>                | <i>spy1304</i>             | 370           | 852            | 131            | 78             |
| SpM1_ChORF1734_s_at       | <i>spy1734</i>             | <i>spy1734</i>             | 1114          | 853            | 947            | 804            |
| SpM1_ChORF2045_s_at       | <i>spy2045</i>             | <i>spy2045</i>             | 668           | 854            | 670            | 541            |
| SpM1_ChORF2058_s_at       | <i>secE</i>                | <i>spy2058</i>             | 1072          | 855            | 1425           | 1347           |
| SpM1_ChORF1958_s_at       | <i>def</i>                 | <i>spy1958</i>             | 996           | 856            | 1076           | 1329           |
| SpM1_ChORF1391_s_at       | <i>spy1391</i>             | <i>spy1391</i>             | 983           | 857            | 1174           | 1154           |
| SpM1_ChORF0308_s_at       | <i>nadD</i>                | <i>spy0308</i>             | 959           | 858            | 1123           | 1113           |
| SpM1_ChORF1861_s_at       | <i>spy1861</i>             | <i>spy1861</i>             | 1220          | 859            | 925            | 992            |
| SpM1_ChORF1101_s_at       | <i>murB</i>                | <i>spy1101</i>             | 1077          | 860            | 1166           | 1081           |
| SpM1_ChORF0131_at         | <i>spy0131</i>             | <i>spy0131</i>             | 925           | 861            | 639            | 527            |
| SpM1_ChORF1964_s_at       | <i>cdsA</i>                | <i>spy1964</i>             | 814           | 862            | 919            | 892            |
| SpM1_ChORF0235_s_at       | <i>spy0235</i>             | <i>spy0235</i>             | 870           | 863            | 1164           | 1043           |
| SpM1_ChORF0236_s_at       | <i>sms</i>                 | <i>spy0236</i>             | 845           | 864            | 1029           | 1024           |
| SpM1_ChORF1718_s_at       | <i>spy1718</i>             | <i>spy1718</i>             | 1266          | 865            | 1298           | 1479           |
| SpM1_ChORF1156_s_at       | <i>spy1156</i>             | <i>spy1156</i>             | 466           | 866            | 495            | 241            |
| SpM1_ChORF1253_s_at       | <i>spy1253</i>             | <i>spy1253</i>             | 823           | 867            | 823            | 643            |
| SpM12_ChORF246-9_s_at     | <i>spy0802</i>             | <i>spy0802</i>             | 594           | 868            | 487            | 349            |
| SpM1_ChORF1546_s_at       | <i>spy1546</i>             | <i>spy1546</i>             | 16            | 869            | 209            | 72             |
| SpM1_ChORF1011_s_at       | <i>spy1011</i>             | <i>spy1011</i>             | 986           | 870            | 816            | 1021           |
| SpM1_ChORF0604_s_at       | <i>spy0604</i>             | <i>spy0604</i>             | 850           | 871            | 1189           | 1183           |
| SpM1_ChORF0905_s_at       | <i>ung</i>                 | <i>spy0905</i>             | 1079          | 872            | 1052           | 1221           |
| SpM1_ChORF1161_s_at       | <i>spyM18_1121</i>         | <i>spyM18_1121</i>         | 917           | 873            | 1003           | 851            |
| SpM1_ChORF1747_s_at       | <i>accB</i>                | <i>spy1747</i>             | 71            | 874            | 832            | 549            |
| SpM1_ChORF2157_s_at       | <i>hisS</i>                | <i>spy2157</i>             | 1108          | 875            | 1148           | 1256           |
| SpM1_ChORF1744_s_at       | <i>accD</i>                | <i>spy1744</i>             | 49            | 876            | 871            | 600            |

| Probe Set Name *          | Gene Name                   | Synonym                     | Rank<br>0 min | Rank<br>30 min | Rank<br>60 min | Rank<br>90 min |
|---------------------------|-----------------------------|-----------------------------|---------------|----------------|----------------|----------------|
| SpM3_ChORF1086_at         | <i>spyM3_1086</i>           | <i>SpyM3_1086</i>           | 886           | 877            | 1006           | 957            |
| SpM1_ChORF0439_s_at       | <i>spy0439</i>              | <i>spy0439</i>              | 482           | 878            | 850            | 987            |
| SpM1_ChORF1402_s_at       | <i>spy1402</i>              | <i>spy1402</i>              | 809           | 879            | 1020           | 1064           |
| SpM1_ChORF0471_s_at       | <i>phoH</i>                 | <i>spy0471</i>              | 902           | 880            | 969            | 1122           |
| SpM1_ChORF1010_s_at       | <i>mutX</i>                 | <i>spy1010</i>              | 1130          | 881            | 931            | 1186           |
| SpM1_ChORF0882_s_at       | <i>thyA</i>                 | <i>spy0882</i>              | 1090          | 882            | 1283           | 1466           |
| SpM1_ChORF1840_s_at       | <i>spy1840</i>              | <i>spy1840</i>              | 1225          | 883            | 1310           | 1424           |
| SpM1_ChORF1386_s_at       | <i>spy1386</i>              | <i>spy1386</i>              | 429           | 884            | 309            | 206            |
| SpM1_ChORF0511_s_at       | <i>gloA</i>                 | <i>spy0511</i>              | 297           | 885            | 433            | 448            |
| SpM1_ChORF1852_s_at       | <i>spy1852</i>              | <i>spy1852</i>              | 1188          | 886            | 1126           | 1017           |
| SpM1_ChORF0800_s_at       | <i>spy0800</i>              | <i>spy0800</i>              | 514           | 887            | 482            | 369            |
| SpM1_ChORF0320_s_at       | <i>spy0320</i>              | <i>spy0320</i>              | 941           | 888            | 893            | 872            |
| SpM1_ChORF0309_s_at       | <i>spy0309</i>              | <i>spy0309</i>              | 987           | 889            | 1134           | 1120           |
| SpM1_ChORF1036_s_at       | <i>spy1036</i>              | <i>spy1036</i>              | 1190          | 890            | 921            | 1168           |
| SpM1_ChORF0745_s_at       | <i>sagH</i>                 | <i>spy0745</i>              | 994           | 891            | 239            | 142            |
| SpM1_ChORF1960_s_at       | <i>spy1960</i>              | <i>spy1960</i>              | 627           | 892            | 742            | 688            |
| SpM1_ChORF1133_s_at       | <i>proV</i>                 | <i>spy1133</i>              | 887           | 893            | 949            | 873            |
| SpM1_ChORF1758_s_at       | <i>phaB</i>                 | <i>spy1758</i>              | 79            | 894            | 946            | 813            |
| SpM1_ChORF1144_s_at       | <i>spy1144</i>              | <i>spy1144</i>              | 871           | 895            | 956            | 1063           |
| SpM1_ChORF1246_s_at       | <i>spy1246</i>              | <i>spy1246</i>              | 914           | 896            | 982            | 1075           |
| SpM1_ChORF2153_s_at       | <i>spy2153</i>              | <i>spy2153</i>              | 995           | 897            | 855            | 901            |
| SpM3_ChORF0503_s_at       | <i>spyM3_0503</i>           | <i>SpyM3_0503</i>           | 1065          | 898            | 1017           | 995            |
| SpM1_ChORF1715_s_at       | <i>copA</i>                 | <i>spy1715</i>              | 798           | 899            | 650            | 484            |
|                           | <i>spyoM5_ChrORF_270b10</i> | <i>SpyoM5_ChrORF_270b10</i> |               |                |                |                |
| SpM5_ChORF270b-210_s_at   | <i>p1t_210</i>              | <i>.p1t_210</i>             | 717           | 900            | 808            | 735            |
| SpM1_ChORF1576_s_at       | <i>spy1576</i>              | <i>spy1576</i>              | 672           | 901            | 1072           | 923            |
| SpM1_ChORF1422_s_at       | <i>recR</i>                 | <i>spy1422</i>              | 943           | 902            | 1064           | 1045           |
| SpM1_ChORF1404_s_at       | <i>spy1404</i>              | <i>spy1404</i>              | 923           | 903            | 1112           | 1162           |
| SpM1_ChORF1345_s_at       | <i>spy1345</i>              | <i>spy1345</i>              | 713           | 904            | 800            | 733            |
| SpM1_ChORF1728_s_at       | <i>spy1728</i>              | <i>spy1728</i>              | 1091          | 905            | 909            | 1178           |
| SpM1_ChORF0390_s_at       | <i>spy0390</i>              | <i>spy0390</i>              | 792           | 906            | 1119           | 1173           |
| SpM1_ChORF0891_s_at       | <i>arsC</i>                 | <i>spy0891</i>              | 719           | 907            | 941            | 944            |
| SpM1_ChORF1042_s_at       | <i>spy1042</i>              | <i>spy1042</i>              | 768           | 908            | 1190           | 1324           |
| SpM1_ChORF1901_s_at       | <i>truA</i>                 | <i>spy1901</i>              | 933           | 909            | 1073           | 1242           |
| SpM18_ChORF1122_s_at      | <i>spy1162</i>              | <i>spy1162</i>              | 911           | 910            | 977            | 864            |
| SpM1_ChORF1054_at         | <i>scIB</i>                 | <i>spy1054</i>              | 985           | 911            | 964            | 884            |
| SpM1_ChORF0839_s_at       | <i>spy0839</i>              | <i>spy0839</i>              | 862           | 912            | 546            | 547            |
| SpM1_ChORF1577_s_at       | <i>aroB</i>                 | <i>spy1577</i>              | 539           | 913            | 970            | 836            |
| SpM1_ChORF1121_s_at       | <i>spy1121</i>              | <i>spy1121</i>              | 918           | 914            | 1001           | 1052           |
| SpM1_ChORF0412_s_at       | <i>exoA</i>                 | <i>spy0412</i>              | 1210          | 915            | 1195           | 1274           |
| SpM1_ChORF0914_s_at       | <i>spy0914</i>              | <i>spy0914</i>              | 774           | 916            | 1132           | 1283           |
| SpM1_ChORF0773_s_at       | <i>spy0773</i>              | <i>spy0773</i>              | 490           | 917            | 923            | 928            |
| SpM1_ChORF0877_s_at       | <i>mvaD</i>                 | <i>spy0877</i>              | 851           | 918            | 965            | 890            |
| SpM1_ChORF1988_s_at       | <i>spy1988</i>              | <i>spy1988</i>              | 971           | 919            | 769            | 770            |
| SpM1_ChORF2115_s_at       | <i>spy2115</i>              | <i>spy2115</i>              | 571           | 920            | 837            | 699            |
| SpM1_ChORF1748_s_at       | <i>fabF</i>                 | <i>spy1748</i>              | 46            | 921            | 860            | 602            |
| SpM1_ChORF0898_s_at       | <i>cpsY</i>                 | <i>spy0898</i>              | 601           | 922            | 1050           | 1013           |
| SpM1_ChORF0358_s_at       | <i>spy0358</i>              | <i>spy0358</i>              | 778           | 923            | 1093           | 1046           |
| SpM1_ChORF0598_s_at       | <i>spy0598</i>              | <i>spy0598</i>              | 1271          | 924            | 1192           | 1356           |
| SpM1_ChORF1772_s_at       | <i>gatC</i>                 | <i>spy1772</i>              | 1097          | 925            | 1237           | 1305           |
| SpM1_ChORF0921_s_at       | <i>miaA</i>                 | <i>spy0921</i>              | 924           | 926            | 1008           | 905            |
| SpM1_ChORF0927_s_at       | <i>apt</i>                  | <i>spy0927</i>              | 874           | 927            | 1057           | 1019           |
| SpM1_ChORF0716_s_at       | <i>agaS</i>                 | <i>spy0716</i>              | 898           | 928            | 777            | 920            |
| SpM1_ChORF0130_at         | <i>spy0130</i>              | <i>spy0130</i>              | 469           | 929            | 873            | 1472           |
| SpM1_ChORF1125_s_at       | <i>spy1125</i>              | <i>spy1125</i>              | 1073          | 930            | 1183           | 1276           |
| SpM1_ChORF1142_s_at       | <i>hemK</i>                 | <i>spy1142</i>              | 981           | 931            | 1079           | 1222           |
| SpM1_ChORF1582_s_at       | <i>spy1582</i>              | <i>spy1582</i>              | 702           | 932            | 822            | 803            |
| SpM1_ChORF1991_s_at       | <i>trpG</i>                 | <i>spy1991</i>              | 741           | 933            | 844            | 792            |
| SpM12_ChORF281-1_s_at     | <i>spy1035</i>              | <i>spy1035</i>              | 806           | 934            | 1066           | 985            |
| SpM1_ChORF2193_s_at       | <i>spy2193</i>              | <i>spy2193</i>              | 1058          | 935            | 1059           | 1095           |
|                           | <i>spyoM5_ChrORF_J7578C</i> | <i>SpyoM5_ChrORF_J7578C</i> |               |                |                |                |
| SpM5_ChORFJ7578C-342_s_at | <i>e05.s1c_342</i>          | <i>e05.s1c_342</i>          | 1340          | 936            | 1215           | 1174           |

| Probe Set Name *       | Gene Name                  | Synonym                    | Rank<br>0 min | Rank<br>30 min | Rank<br>60 min | Rank<br>90 min |
|------------------------|----------------------------|----------------------------|---------------|----------------|----------------|----------------|
| SpM1_ChORF1526_s_at    | <i>spy1526</i>             | <i>spy1526</i>             | 931           | 937            | 1038           | 1010           |
| SpM1_ChORF1463_s_at    | <i>spy1463</i>             | <i>spy1463</i>             | 448           | 938            | 790            | 609            |
| SpM1_ChORF1179_s_at    | <i>spy1179</i>             | <i>spy1179</i>             | 1112          | 939            | 935            | 979            |
| SpM1_ChORF2203_s_at    | <i>spy2203</i>             | <i>spy2203</i>             | 784           | 940            | 1144           | 1264           |
| SpM1_ChORF1955_s_at    | <i>rpsO</i>                | <i>spy1955</i>             | 1107          | 941            | 1269           | 1233           |
| SpM1_ChORF1221_s_at    | <i>dpfB</i>                | <i>spy1221</i>             | 1331          | 942            | 1100           | 1200           |
| SpM1_ChORF0356_s_at    | <i>spy0356</i>             | <i>spy0356</i>             | 1137          | 943            | 1251           | 1208           |
| SpM1_ChORF1395_s_at    | <i>spy1395</i>             | <i>spy1395</i>             | 662           | 944            | 866            | 647            |
| SpM1_ChORF1309_s_at    | <i>dlfD</i>                | <i>spy1309</i>             | 600           | 945            | 870            | 682            |
| SpM1_ChORF0743_s_at    | <i>sagF</i>                | <i>spy0743</i>             | 970           | 946            | 235            | 156            |
| SpM1_ChORF0776_s_at    | <i>rexB</i>                | <i>spy0776</i>             | 762           | 947            | 994            | 1100           |
| SpM1_ChORF1749_s_at    | <i>fabG</i>                | <i>spy1749</i>             | 87            | 948            | 916            | 664            |
| SpM1_ChORF1697_s_at    | <i>spy1697</i>             | <i>spy1697</i>             | 955           | 949            | 1104           | 1048           |
| SpM1_ChORF1868_s_at    | <i>nupC</i>                | <i>spy1868</i>             | 802           | 950            | 674            | 539            |
| SpM1_ChORF0780_s_at    | <i>mscL</i>                | <i>spy0780</i>             | 628           | 951            | 678            | 487            |
| SpM1_ChORF0744_s_at    | <i>sagG</i>                | <i>spy0744</i>             | 1027          | 952            | 276            | 169            |
|                        | <i>spyoM49_ChORF_sp001</i> | <i>SpyoM49_ChORF_sp001</i> |               |                |                |                |
| SpM49_ChORF903-2_s_at  | <i>_0_903_2</i>            | <i>_0_903_2</i>            | 804           | 953            | 824            | 795            |
| SpM1_ChORF0505_s_at    | <i>spy0505</i>             | <i>spy0505</i>             | 913           | 954            | 986            | 839            |
| SpM12_ChORF279-21_s_at | <i>spy0223</i>             | <i>spy0223</i>             | 1339          | 955            | 1201           | 1210           |
| SpM1_ChORF0930_s_at    | <i>spy0930</i>             | <i>spy0930</i>             | 988           | 956            | 1054           | 956            |
| SpM1_ChORF0603_s_at    | <i>spy0603</i>             | <i>spy0603</i>             | 948           | 957            | 1227           | 1346           |
| SpM1_ChORF1252_s_at    | <i>spy1252</i>             | <i>spy1252</i>             | 844           | 958            | 1053           | 932            |
| SpM1_ChORF0723_s_at    | <i>spyM18_0790</i>         | <i>spyM18_0790</i>         | 788           | 959            | 920            | 732            |
| SpM18_ChORF0822_s_at   | <i>spyM18_0822</i>         | <i>spyM18_0822</i>         | 1104          | 960            | 1055           | 1044           |
| SpM1_ChORF1316_s_at    | <i>glnQ.2</i>              | <i>spy1316</i>             | 432           | 961            | 1065           | 975            |
| SpM1_ChORF1311_s_at    | <i>dlfB</i>                | <i>spy1311</i>             | 529           | 962            | 896            | 831            |
| SpM1_ChORF0181_s_at    | <i>spy0181</i>             | <i>spy0181</i>             | 1254          | 963            | 1044           | 927            |
| SpM1_ChORF0039_s_at    | <i>spy0039</i>             | <i>spy0039</i>             | 968           | 964            | 940            | 919            |
| SpM1_ChORF0361_s_at    | <i>glr</i>                 | <i>spy0361</i>             | 1007          | 965            | 1015           | 1215           |
| SpM1_ChORF1672_s_at    | <i>proA</i>                | <i>spy1670</i>             | 1019          | 966            | 962            | 977            |
| SpM1_ChORF1662_s_at    | <i>spy1659</i>             | <i>spy1659</i>             | 916           | 967            | 1030           | 978            |
| SpM1_ChORF1424_s_at    | <i>spy1424</i>             | <i>spy1424</i>             | 883           | 968            | 872            | 832            |
| SpM1_ChORF0754_s_at    | <i>atpE</i>                | <i>spy0754</i>             | 1029          | 969            | 1402           | 1444           |
| SpM1_ChORF1678_s_at    | <i>spy1678</i>             | <i>spy1678</i>             | 506           | 970            | 81             | 75             |
| SpM1_ChORF0366_s_at    | <i>dys, scpA</i>           | <i>spy0366</i>             | 767           | 971            | 966            | 1212           |
| SpM1_ChORF0923_s_at    | <i>spy0923</i>             | <i>spy0923</i>             | 864           | 972            | 1039           | 960            |
| SpM1_ChORF0369_s_at    | <i>spy0369</i>             | <i>spy0369</i>             | 746           | 973            | 906            | 1167           |
| SpM1_ChORF1681_s_at    | <i>npx/nox.2</i>           | <i>spy1681</i>             | 392           | 974            | 139            | 202            |
| SpM1_ChORF1785_s_at    | <i>recG</i>                | <i>spy1785</i>             | 813           | 975            | 953            | 899            |
| SpM1_ChORF0764_s_at    | <i>epuA</i>                | <i>spy0764</i>             | 1132          | 976            | 1071           | 1060           |
| SpM1_ChORF1782_s_at    | <i>asnB</i>                | <i>spy1782</i>             | 1172          | 977            | 989            | 1030           |
| SpM1_ChORF0880_s_at    | <i>mvaS.1</i>              | <i>spy0880</i>             | 734           | 978            | 1198           | 1236           |
| SpM1_ChORF2186_s_at    | <i>spy2186</i>             | <i>spy2186</i>             | 1150          | 979            | 1122           | 1132           |
| SpM1_ChORF1206_s_at    | <i>spy1206</i>             | <i>spy1206</i>             | 1203          | 980            | 1256           | 1296           |
| SpM1_ChORF0144_s_at    | <i>spy0144</i>             | <i>spy0144</i>             | 1235          | 981            | 985            | 1028           |
| SpM1_ChORF1286_s_at    | <i>spy1286</i>             | <i>spy1286</i>             | 922           | 982            | 695            | 575            |
| SpM3_ChORF0493_s_at    | <i>spyM3_0493</i>          | <i>SpyM3_0493</i>          | 1044          | 983            | 1406           | 1464           |
| SpM18_ChORF0709_s_at   | <i>bsaA</i>                | <i>spyM18_0709</i>         | 165           | 984            | 130            | 157            |
| SpM1_ChORF0432_x_at    | <i>spy0432</i>             | <i>spy0432</i>             | 758           | 985            | 687            | 658            |
| SpM1_ChORF1544_s_at    | <i>arcB</i>                | <i>spy1544</i>             | 24            | 986            | 267            | 83             |
| SpM1_ChORF0783_s_at    | <i>spy0783</i>             | <i>spy0783</i>             | 801           | 987            | 945            | 779            |
| SpM1_ChORF1203_s_at    | <i>spy1203</i>             | <i>spy1203</i>             | 1282          | 988            | 1253           | 1239           |
| SpM1_ChORF1294_s_at    | <i>malE</i>                | <i>spy1294</i>             | 1006          | 989            | 84             | 103            |
| SpM1_ChORF1337_s_at    | <i>rsuA</i>                | <i>spy1337</i>             | 1154          | 990            | 1260           | 1246           |
| SpM1_ChORF0883_s_at    | <i>dys</i>                 | <i>spy0883</i>             | 963           | 991            | 1352           | 1449           |
| SpM1_ChORF0329_s_at    | <i>gidB</i>                | <i>spy0329</i>             | 1294          | 992            | 1319           | 1421           |
| SpM1_ChORF1251_s_at    | <i>truB</i>                | <i>spy1251</i>             | 709           | 993            | 993            | 880            |
| SpM1_ChORF1066_at      | <i>spy1066</i>             | <i>spy1066</i>             | 938           | 994            | 934            | 918            |
| SpM1_ChORF1534_s_at    | <i>spy1534</i>             | <i>spy1534</i>             | 1061          | 995            | 1060           | 1138           |
| SpM1_ChORF1987_s_at    | <i>spy1987</i>             | <i>spy1987</i>             | 1028          | 996            | 961            | 938            |
| SpM1_ChORF0044_s_at    | <i>adhA</i>                | <i>spy0044</i>             | 423           | 997            | 366            | 305            |



| Probe Set Name *       | Gene Name                  | Synonym                    | Rank<br>0 min | Rank<br>30 min | Rank<br>60 min | Rank<br>90 min |
|------------------------|----------------------------|----------------------------|---------------|----------------|----------------|----------------|
| SpM1_ChORF0045_s_at    | <i>spy0045</i>             | <i>spy0045</i>             | 890           | 998            | 948            | 802            |
| SpM1_ChORF0752_s_at    | <i>spy0752</i>             | <i>spy0752</i>             | 716           | 999            | 1062           | 1039           |
| SpM1_ChORF2181_s_at    | <i>spy2181</i>             | <i>spy2181</i>             | 1042          | 1000           | 1272           | 1485           |
| SpM1_ChORF1608_s_at    | <i>spy1608</i>             | <i>spy1608</i>             | 1199          | 1001           | 984            | 1179           |
| SpM1_ChORF0837_s_at    | <i>spy0837</i>             | <i>spy0837</i>             | 942           | 1002           | 724            | 856            |
| SpM1_ChORF0646_s_at    | <i>spy0646</i>             | <i>spy0646</i>             | 884           | 1003           | 1154           | 1118           |
| SpM1_ChORF1104_s_at    | <i>potC</i>                | <i>spy1104</i>             | 1152          | 1004           | 1096           | 1031           |
| SpM1_ChORF0559_s_at    | <i>spy0559</i>             | <i>spy0559</i>             | 910           | 1005           | 905            | 786            |
| SpM1_ChORF1989_s_at    | <i>spy1989</i>             | <i>spy1989</i>             | 1101          | 1006           | 861            | 896            |
| SpM1_ChORF1906_s_at    | <i>hsdM</i>                | <i>spy1906</i>             | 1030          | 1007           | 867            | 887            |
| SpM1_ChORF2097_s_at    | <i>spy2097</i>             | <i>spy2097</i>             | 547           | 1008           | 901            | 716            |
| SpM1_ChORF1043_s_at    | <i>spy1043</i>             | <i>spy1043</i>             | 836           | 1009           | 1150           | 1291           |
| SpM12_ChORF283-25_s_at | <i>spy1824</i>             | <i>spy1824</i>             | 877           | 1010           | 885            | 764            |
| SpM1_ChORF1362_s_at    | <i>birA</i>                | <i>spy1362</i>             | 949           | 1011           | 1374           | 1432           |
| SpM1_ChORF1530_s_at    | <i>spy1530</i>             | <i>spy1530</i>             | 1117          | 1012           | 912            | 1114           |
| SpM1_ChORF1427_s_at    | <i>spy1427</i>             | <i>spy1427</i>             | 1122          | 1013           | 1036           | 1061           |
| SpM1_ChORF0843_s_at    | <i>spy0843</i>             | <i>spy0843</i>             | 1228          | 1014           | 1240           | 1288           |
| SpM1_ChORF0590_s_at    | <i>spy0590</i>             | <i>spy0590</i>             | 1213          | 1015           | 1259           | 1279           |
| SpM1_ChORF0435_s_at    | <i>spy0435</i>             | <i>spy0435</i>             | 1300          | 1016           | 1449           | 1463           |
| SpM1_ChORF0912_s_at    | <i>spy0912</i>             | <i>spy0912</i>             | 1286          | 1017           | 1369           | 1420           |
| SpM18_ChORF0118_s_at   | <i>trxA</i>                | <i>spyM18_0118</i>         | 1293          | 1018           | 1384           | 1493           |
| SpM1_ChORF0789_s_at    | <i>rgpCc</i>               | <i>spy0789</i>             | 1056          | 1019           | 1151           | 1235           |
| SpM1_ChORF1289_s_at    | <i>spy1289</i>             | <i>spy1289</i>             | 1082          | 1020           | 1087           | 1160           |
| SpM1_ChORF1605_s_at    | <i>rocA</i>                | <i>spy1605</i>             | 1233          | 1021           | 1085           | 1130           |
| SpM1_ChORF1980_s_at    | <i>spy1980</i>             | <i>spy1980</i>             | 833           | 1022           | 1024           | 1085           |
| SpM1_ChORF0401_s_at    | <i>spy0401</i>             | <i>spy0401</i>             | 879           | 1023           | 847            | 718            |
| SpM1_ChORF0642_s_at    | <i>spy0642</i>             | <i>spy0642</i>             | 998           | 1024           | 1116           | 1204           |
| SpM1_ChORF1158_s_at    | <i>spy1158</i>             | <i>spy1158</i>             | 781           | 1025           | 915            | 921            |
| SpM1_ChORF0599_s_at    | <i>spy0599</i>             | <i>spy0599</i>             | 1367          | 1026           | 1332           | 1467           |
| SpM1_ChORF1570_s_at    | <i>spy1570</i>             | <i>spy1570</i>             | 1086          | 1027           | 1254           | 1213           |
| SpM1_ChORF1998_s_at    | <i>smeZ</i>                | <i>spy1998</i>             | 1052          | 1028           | 1088           | 1141           |
| SpM1_ChORF1776_s_at    | <i>spy1776</i>             | <i>spy1776</i>             | 1099          | 1029           | 1033           | 1053           |
| SpM1_ChORF0532_s_at    | <i>smc</i>                 | <i>spy0532</i>             | 516           | 1030           | 1279           | 1359           |
| SpM1_ChORF0884_s_at    | <i>spy0884</i>             | <i>spy0884</i>             | 912           | 1031           | 1265           | 1290           |
| SpM1_ChORF1022_s_at    | <i>estA</i>                | <i>spy1022</i>             | 1110          | 1032           | 967            | 1090           |
| SpM1_ChORF0844_s_at    | <i>spy0844</i>             | <i>spy0844</i>             | 1260          | 1033           | 1248           | 1353           |
| SpM1_ChORF1789_s_at    | <i>spy1789</i>             | <i>spy1789</i>             | 875           | 1034           | 997            | 1003           |
| SpM12_ChORF197-4_s_at  | <i>spyoM12_ChORF_197_4</i> | <i>SpyoM12_ChORF_197_4</i> | 703           | 1035           | 924            | 774            |
| SpM1_ChORF0259_s_at    | <i>spy0259</i>             | <i>spy0259</i>             | 1283          | 1036           | 1216           | 1307           |
| SpM1_ChORF0477_s_at    | <i>spy0477</i>             | <i>spy0477</i>             | 937           | 1037           | 1125           | 1155           |
| SpM1_ChORF1844_s_at    | <i>recD</i>                | <i>spy1844</i>             | 852           | 1038           | 929            | 931            |
| SpM1_ChORF1414_s_at    | <i>spy1414</i>             | <i>spy1414</i>             | 906           | 1039           | 976            | 799            |
| SpM1_ChORF2090_s_at    | <i>hutG</i>                | <i>spy2090</i>             | 1128          | 1040           | 1016           | 936            |
| SpM1_ChORF0205_s_at    | <i>spy0205</i>             | <i>spy0205</i>             | 1141          | 1041           | 1149           | 1011           |
| SpM18_ChORF1302_s_at   | <i>spyM18_1302</i>         | <i>spyM18_1302</i>         | 946           | 1042           | 764            | 497            |
| SpM1_ChORF0364_s_at    | <i>spy0364</i>             | <i>spy0364</i>             | 951           | 1043           | 1117           | 1361           |
| SpM3_ChORF0584_s_at    | <i>spyM3_0584</i>          | <i>SpyM3_0584</i>          | 1164          | 1044           | 779            | 861            |
| SpM1_ChORF0775_s_at    | <i>spy0775</i>             | <i>spy0775</i>             | 808           | 1045           | 960            | 943            |
| SpM1_ChORF1103_s_at    | <i>potB</i>                | <i>spy1103</i>             | 1178          | 1046           | 1185           | 1142           |
| SpM1_ChORF0312_s_at    | <i>spy0312</i>             | <i>spy0312</i>             | 1075          | 1047           | 1206           | 1216           |
| SpM1_ChORF1922_s_at    | <i>lacB.2</i>              | <i>spy1922</i>             | 481           | 1048           | 1007           | 785            |
| SpM1_ChORF1421_s_at    | <i>ddlA</i>                | <i>spy1421</i>             | 1181          | 1049           | 1255           | 1266           |
| SpM1_ChORF1547_s_at    | <i>arcA</i>                | <i>spy1547</i>             | 22            | 1050           | 140            | 68             |
| SpM1_ChORF0464_s_at    | <i>spy0464</i>             | <i>spy0464</i>             | 868           | 1051           | 1075           | 959            |
| SpM1_ChORF0182_s_at    | <i>spy0182</i>             | <i>spy0182</i>             | 538           | 1052           | 43             | 29             |
| SpM1_ChORF2034_s_at    | <i>spy2034</i>             | <i>spy2034</i>             | 966           | 1053           | 1127           | 1107           |
| SpM12_ChORF267-3_s_at  | <i>spyoM12_ChORF_267_3</i> | <i>SpyoM12_ChORF_267_3</i> | 1265          | 1054           | 1356           | 1427           |
| SpM18_ChORF0945_s_at   | <i>spyM18_0945</i>         | <i>spyM18_0945</i>         | 930           | 1055           | 1270           | 1299           |
| SpM1_ChORF0306_s_at    | <i>spy0306</i>             | <i>spy0306</i>             | 1169          | 1056           | 1290           | 1310           |
| SpM1_ChORF1344_s_at    | <i>spy1344</i>             | <i>spy1344</i>             | 991           | 1057           | 1070           | 982            |

| Probe Set Name *       | Gene Name                          | Synonym                            | Rank<br>0 min | Rank<br>30 min | Rank<br>60 min | Rank<br>90 min |
|------------------------|------------------------------------|------------------------------------|---------------|----------------|----------------|----------------|
| SpM1_ChORF1751_s_at    | <i>fabK</i>                        | <i>spy1751</i>                     | 97            | 1058           | 1040           | 763            |
| SpM1_ChORF1093_s_at    | <i>dacA</i>                        | <i>spy1093</i>                     | 1264          | 1059           | 1304           | 1314           |
| SpM1_ChORF1712_s_at    | <i>lacR.1</i>                      | <i>spy1712</i>                     | 1237          | 1060           | 662            | 707            |
| SpM12_ChORF248-9_s_at  | <i>spyoM12_ChORF_248_9</i>         | <i>SpyoM12_ChORF_248_9</i>         | 1149          | 1061           | 1146           | 1080           |
| SpM1_ChORF1254_s_at    | <i>spy1254</i>                     | <i>spy1254</i>                     | 1084          | 1062           | 1097           | 1005           |
| SpM1_ChORF0824_s_at    | <i>spy0824</i>                     | <i>spy0824</i>                     | 1010          | 1063           | 1231           | 1260           |
| SpM49_ChORF903-3_s_at  | <i>spyoM49_ChORF_sp001_0_903_3</i> | <i>SpyoM49_ChORF_sp001_0_903_3</i> | 993           | 1064           | 1058           | 998            |
| SpM1_ChORF0367_s_at    | <i>scpB</i>                        | <i>spy0367</i>                     | 834           | 1065           | 1031           | 1211           |
| SpM1_ChORF0713_s_at    | <i>pepD</i>                        | <i>spy0713</i>                     | 812           | 1066           | 813            | 871            |
| SpM1_ChORF1410_s_at    | <i>spy1410</i>                     | <i>spy1410</i>                     | 1253          | 1067           | 1177           | 1116           |
| SpM1_ChORF0280_s_at    | <i>bacA</i>                        | <i>spy0280</i>                     | 815           | 1068           | 1011           | 1015           |
| SpM3_ChORF1070_s_at    | <i>spyM3_1070</i>                  | <i>SpyM3_1070</i>                  | 1057          | 1069           | 1249           | 1354           |
| SpM1_ChORF1917_s_at    | <i>lacE</i>                        | <i>spy1917</i>                     | 470           | 1070           | 908            | 586            |
| SpM1_ChORF1746_s_at    | <i>fabZ</i>                        | <i>spy1746</i>                     | 82            | 1071           | 1051           | 768            |
| SpM1_ChORF0918_s_at    | <i>tehA</i>                        | <i>spy0918</i>                     | 1131          | 1072           | 1170           | 1000           |
| SpM1_ChORF1700_s_at    | <i>spy1700</i>                     | <i>spy1700</i>                     | 1009          | 1073           | 1110           | 1124           |
| SpM12_ChORF262-15_s_at | <i>spyoM12_ChORF_262_1_5</i>       | <i>SpyoM12_ChORF_262_1_5</i>       | 1217          | 1074           | 369            | 219            |
| SpM1_ChORF0497_s_at    | <i>fpG</i>                         | <i>spy0497</i>                     | 944           | 1075           | 1143           | 1137           |
| SpM1_ChORF1351_s_at    | <i>aroK</i>                        | <i>spy1351</i>                     | 958           | 1076           | 892            | 844            |
| SpM1_ChORF1379_s_at    | <i>spy1379</i>                     | <i>spy1379</i>                     | 1041          | 1077           | 936            | 883            |
| SpM1_ChORF0459_s_at    | <i>spy0459</i>                     | <i>spy0459</i>                     | 1113          | 1078           | 1182           | 1165           |
| SpM1_ChORF1502_s_at    | <i>foiD</i>                        | <i>spy1502</i>                     | 1291          | 1079           | 1381           | 1401           |
| SpM1_ChORF0798_s_at    | <i>spy0798</i>                     | <i>spy0798</i>                     | 1080          | 1080           | 1105           | 1150           |
| SpM1_ChORF1765_s_at    | <i>spy1765</i>                     | <i>spy1765</i>                     | 1078          | 1081           | 753            | 788            |
| SpM1_ChORF0310_s_at    | <i>spy0310</i>                     | <i>spy0310</i>                     | 1088          | 1082           | 1202           | 1144           |
| SpM1_ChORF1405_s_at    | <i>spy1405</i>                     | <i>spy1405</i>                     | 1064          | 1083           | 1258           | 1371           |
| SpM1_ChORF0013_s_at    | <i>spy0013</i>                     | <i>spy0013</i>                     | 1081          | 1084           | 1191           | 1220           |
| SpM1_ChORF1044_s_at    | <i>spy1044</i>                     | <i>spy1044</i>                     | 872           | 1085           | 1213           | 1297           |
| SpM1_ChORF1346_s_at    | <i>spy1346</i>                     | <i>spy1346</i>                     | 1005          | 1086           | 1046           | 1029           |
| SpM1_ChORF0307_s_at    | <i>spy0307</i>                     | <i>spy0307</i>                     | 1218          | 1087           | 1303           | 1340           |
| SpM1_ChORF1037_s_at    | <i>spy1037</i>                     | <i>spy1037</i>                     | 1224          | 1088           | 1022           | 1225           |
| SpM1_ChORF1064_s_at    | <i>spy1064</i>                     | <i>spy1064</i>                     | 1211          | 1089           | 1241           | 1255           |
| SpM1_ChORF1741_s_at    | <i>manO</i>                        | <i>spy1741</i>                     | 1462          | 1090           | 1417           | 1610           |
| SpM1_ChORF1618_s_at    | <i>cysM</i>                        | <i>spy1618</i>                     | 1062          | 1091           | 1193           | 1199           |
| SpM12_ChORF217-10_s_at | <i>crgR</i>                        | <i>spy1870</i>                     | 675           | 1092           | 979            | 773            |
| SpM12_ChORF299-13_s_at | <i>spyoM12_ChORF_299_1_3</i>       | <i>SpyoM12_ChORF_299_1_3</i>       | 1365          | 1093           | 1002           | 1082           |
| SpM18_ChORF0930_s_at   | <i>rpl35</i>                       | <i>spyM18_0930</i>                 | 1240          | 1094           | 1276           | 1234           |
| SpM1_ChORF1285_s_at    | <i>spy1285</i>                     | <i>spy1285</i>                     | 1038          | 1095           | 829            | 742            |
| SpM1_ChORF1790_s_at    | <i>spy1790</i>                     | <i>spy1790</i>                     | 881           | 1096           | 1092           | 1089           |
| SpM18_ChORF1306_s_at   | <i>spyM18_1306</i>                 | <i>spyM18_1306</i>                 | 780           | 1097           | 654            | 706            |
| SpM1_ChORF0870_s_at    | <i>fms</i>                         | <i>spy0870</i>                     | 1024          | 1098           | 1035           | 980            |
| SpM12_ChORF270-2_s_at  | <i>spy0408</i>                     | <i>spy0408</i>                     | 1083          | 1099           | 1061           | 958            |
| SpM1_ChORF1836_s_at    | <i>spy1836</i>                     | <i>spy1836</i>                     | 1193          | 1100           | 1157           | 1217           |
| SpM1_ChORF0932_s_at    | <i>spy0932</i>                     | <i>spy0932</i>                     | 927           | 1101           | 999            | 916            |
| SpM1_ChORF1804_s_at    | <i>acpS</i>                        | <i>spy1804</i>                     | 1085          | 1102           | 1113           | 997            |
| SpM1_ChORF1411_s_at    | <i>spy1411</i>                     | <i>spy1411</i>                     | 1418          | 1103           | 1404           | 1355           |
| SpM1_ChORF0575_s_at    | <i>spy0575</i>                     | <i>spy0575</i>                     | 939           | 1104           | 1226           | 1275           |
| SpM1_ChORF1701_s_at    | <i>spy1701</i>                     | <i>spy1701</i>                     | 1148          | 1105           | 1179           | 1192           |
| SpM1_ChORF1923_s_at    | <i>lacA.2</i>                      | <i>spy1923</i>                     | 388           | 1106           | 955            | 703            |
| SpM1_ChORF0854_s_at    | <i>fruB</i>                        | <i>spy0854</i>                     | 769           | 1107           | 794            | 946            |
| SpM1_ChORF2174_s_at    | <i>spy2174</i>                     | <i>spy2174</i>                     | 421           | 1108           | 899            | 986            |
| SpM18_ChORF0444_x_s_at | <i>spyM18_0444</i>                 | <i>spyM18_0444</i>                 | 1248          | 1109           | 1499           | 1550           |
| SpM1_ChORF1995_s_at    | <i>flaR</i>                        | <i>spy1995</i>                     | 900           | 1110           | 978            | 793            |
| SpM1_ChORF1273_s_at    | <i>cfa</i>                         | <i>spy1273</i>                     | 1185          | 1111           | 1005           | 1070           |
| SpM1_ChORF1617_s_at    | <i>spy1617</i>                     | <i>spy1617</i>                     | 1167          | 1112           | 1311           | 1375           |
| SpM1_ChORF0772_s_at    | <i>spy0772</i>                     | <i>spy0772</i>                     | 753           | 1113           | 1114           | 1157           |
| SpM1_ChORF0855_s_at    | <i>fruA</i>                        | <i>spy0855</i>                     | 858           | 1114           | 780            | 868            |
| SpM1_ChORF0475_s_at    | <i>dgk</i>                         | <i>spy0475</i>                     | 1037          | 1115           | 1159           | 1227           |

| Probe Set Name *         | Gene Name                  | Synonym                    | Rank<br>0 min | Rank<br>30 min | Rank<br>60 min | Rank<br>90 min |
|--------------------------|----------------------------|----------------------------|---------------|----------------|----------------|----------------|
| SpM1_ChORF1067_s_at      | <i>gabD</i>                | <i>spy1067</i>             | 751           | 1116           | 843            | 777            |
| SpM1_ChORF0228_s_at      | <i>spy0228</i>             | <i>spy0228</i>             | 1255          | 1117           | 1145           | 1094           |
| SpM1_ChORF0407_s_at      | <i>spy0407</i>             | <i>spy0407</i>             | 1018          | 1118           | 1094           | 1047           |
| SpM1_ChORF1019_s_at      | <i>spy1019</i>             | <i>spy1019</i>             | 1156          | 1119           | 741            | 954            |
| SpM1_ChORF1717_at        | <i>copY</i>                | <i>spy1717</i>             | 1060          | 1120           | 1067           | 1035           |
| SpM1_ChORF0393_x_at      | <i>spy0393</i>             | <i>spy0393</i>             | 1256          | 1121           | 1505           | 1551           |
| SpM1_ChORF1270_s_at      | <i>spy1270</i>             | <i>spy1270</i>             | 1076          | 1122           | 1135           | 1062           |
| SpM1_ChORF0649_s_at      | <i>dinG</i>                | <i>spy0649</i>             | 1165          | 1123           | 1167           | 1230           |
| SpM3_ChORF0589_s_at      | <i>spyM3_0589</i>          | <i>SpyM3_0589</i>          | 1241          | 1124           | 1285           | 1237           |
| SpM1_ChORF1600_s_at      | <i>hyl</i>                 | <i>spy1600</i>             | 866           | 1125           | 478            | 378            |
| SpM1_ChORF1899_s_at      | <i>spy1899</i>             | <i>spy1899</i>             | 1109          | 1126           | 1301           | 1478           |
| SpM1_ChORF0850_s_at      | <i>trxB, yumC</i>          | <i>spy0850</i>             | 1162          | 1127           | 1347           | 1341           |
| SpM1_ChORF2006_s_at      | <i>spy2006</i>             | <i>spy2006</i>             | 947           | 1128           | 1084           | 895            |
| SpM1_ChORF0815_s_at      | <i>spy0815</i>             | <i>spy0815</i>             | 1115          | 1129           | 1355           | 1482           |
| SpM1_ChORF0722_s_at      | <i>spy0722</i>             | <i>spy0722</i>             | 1116          | 1130           | 1173           | 1109           |
| SpM1_ChORF1255_s_at      | <i>spy1255</i>             | <i>spy1255</i>             | 1049          | 1131           | 1115           | 1059           |
| SpM1_ChORF0379_s_at      | <i>pflC</i>                | <i>spy0379</i>             | 563           | 1132           | 858            | 789            |
| SpM1_ChORF0414_s_at      | <i>lctO</i>                | <i>spy0414</i>             | 84            | 1133           | 93             | 84             |
| SpM3_ChORF0995_at        | <i>spyM3_0995</i>          | <i>SpyM3_0995</i>          | 889           | 1134           | 1268           | 1313           |
| SpM18_ChORF0672_s_at     | <i>spy0605</i>             | <i>spy0605</i>             | 921           | 1135           | 1000           | 1069           |
| SpM1_ChORF0570_s_at      | <i>spy0570</i>             | <i>spy0570</i>             | 1205          | 1136           | 1289           | 1261           |
| SpM1_ChORF2117_s_at      | <i>cinA</i>                | <i>spy2117</i>             | 1004          | 1137           | 877            | 948            |
| SpM1_ChORF1580_s_at      | <i>spy1580</i>             | <i>spy1580</i>             | 1053          | 1138           | 1194           | 1195           |
| SpM1_ChORF1764_s_at      | <i>spy1764</i>             | <i>spy1764</i>             | 1179          | 1139           | 983            | 1014           |
| SpM1_ChORF2003_s_at      | <i>dppD</i>                | <i>spy2003</i>             | 1191          | 1140           | 1077           | 994            |
| SpM1_ChORF2198_s_at      | <i>spy2198</i>             | <i>spy2198</i>             | 1133          | 1141           | 1471           | 1644           |
| SpM1_ChORF1171_s_at      | <i>satD</i>                | <i>spy1171</i>             | 1653          | 1142           | 1048           | 1129           |
| SpM1_ChORF1766_s_at      | <i>spy1766</i>             | <i>spy1766</i>             | 1230          | 1143           | 1009           | 1083           |
| SpM1_ChORF1539_s_at      | <i>asnA</i>                | <i>spy1539</i>             | 1285          | 1144           | 1324           | 1439           |
| SpM1_ChORF1013_s_at      | <i>fbp</i>                 | <i>spy1013</i>             | 1145          | 1145           | 1210           | 1304           |
| SpM1_ChORF0581_s_at      | <i>spy0581</i>             | <i>spy0581</i>             | 1126          | 1146           | 1101           | 955            |
| SpM1_ChORF0437_at        | <i>spy0437</i>             | <i>spy0437</i>             | 1406          | 1147           | 1330           | 1417           |
| SpM49_ChORF7585-45_s_at  | <i>spy1606</i>             | <i>spy1606</i>             | 1207          | 1148           | 973            | 966            |
| SpM1_ChORF1731_s_at      | <i>spy1731</i>             | <i>spy1731</i>             | 1229          | 1149           | 1023           | 1066           |
| SpM1_ChORF1936_s_at      | <i>spy1936</i>             | <i>spy1936</i>             | 777           | 1150           | 1082           | 845            |
| SpM1_ChORF1114_s_at      | <i>spy1114</i>             | <i>spy1114</i>             | 1318          | 1151           | 1469           | 1574           |
| SpM1_ChORF2189_s_at      | <i>sdhB</i>                | <i>spy2189</i>             | 1160          | 1152           | 619            | 791            |
| SpM1_ChORF1900_s_at      | <i>thiD</i>                | <i>spy1900</i>             | 1106          | 1153           | 1292           | 1425           |
| SpM1_ChORF0881_s_at      | <i>mvaS.2</i>              | <i>spy0881</i>             | 1195          | 1154           | 1502           | 1607           |
| SpM1_ChORF2049_s_at      | <i>pflD</i>                | <i>spy2049</i>             | 1184          | 1155           | 108            | 105            |
| SpM1_ChORF0576_s_at      | <i>spy0576</i>             | <i>spy0576</i>             | 863           | 1156           | 1218           | 1240           |
| SpM1_ChORF1835_s_at      | <i>trx</i>                 | <i>spy1835</i>             | 1125          | 1157           | 1282           | 1382           |
| SpM1_ChORF1784_s_at      | <i>spy1784</i>             | <i>spy1784</i>             | 1368          | 1158           | 1475           | 1502           |
| SpM1_ChORF1599_s_at      | <i>spy1599</i>             | <i>spy1599</i>             | 827           | 1159           | 427            | 326            |
| SpM1_ChORF1549_s_at      | <i>ahrC.2</i>              | <i>spy1549</i>             | 1202          | 1160           | 1368           | 1334           |
| SpM1_ChORF1537_s_at      | <i>kdtB</i>                | <i>spy1537</i>             | 1246          | 1161           | 1302           | 1351           |
|                          | <i>spyoM5_ChORF_4P31a0</i> | <i>SpyoM5_ChORF_4P31a0</i> |               |                |                |                |
| SpM5_ChORF4P31a-181_x_at | <i>1.w2c2309_18</i>        | <i>1.w2c2309_18</i>        | 1034          | 1162           | 1049           | 837            |
| SpM1_ChORF0242_s_at      | <i>fasB</i>                | <i>spy0242</i>             | 1357          | 1163           | 1367           | 1407           |
| SpM1_ChORF2169_s_at      | <i>spy2169</i>             | <i>spy2169</i>             | 1238          | 1164           | 1262           | 1289           |
| SpM1_ChORF1551_s_at      | <i>spy1551</i>             | <i>spy1551</i>             | 821           | 1165           | 1098           | 1057           |
| SpM1_ChORF1178_s_at      | <i>citG</i>                | <i>spy1178</i>             | 1194          | 1166           | 1107           | 988            |
| SpM18_ChORF0631_s_at     | <i>spyM18_0631</i>         | <i>spyM18_0631</i>         | 1159          | 1167           | 1155           | 1189           |
| SpM1_ChORF0806_s_at      | <i>rpIT</i>                | <i>spy0806</i>             | 1308          | 1168           | 1421           | 1333           |
|                          | <i>spyoM12_ChORF_291_7</i> | <i>SpyoM12_ChORF_291_7</i> |               |                |                |                |
| SpM12_ChORF291-7_s_at    | <i>malD</i>                | <i>spy1299</i>             | 1370          | 1169           | 1434           | 1487           |
| SpM1_ChORF1299_at        | <i>spy1299</i>             | <i>spy1299</i>             | 935           | 1170           | 564            | 159            |
| SpM1_ChORF1127_s_at      | <i>spy1127</i>             | <i>spy1127</i>             | 1071          | 1171           | 1220           | 1139           |
| SpM1_ChORF1898_s_at      | <i>spy1898</i>             | <i>spy1898</i>             | 1189          | 1172           | 1359           | 1572           |
| SpM1_ChORF0904_s_at      | <i>spy0904</i>             | <i>spy0904</i>             | 1026          | 1173           | 1152           | 1431           |
| SpM1_ChORF0371_s_at      | <i>spy0371</i>             | <i>spy0371</i>             | 1142          | 1174           | 1188           | 1176           |
| SpM1_ChORF2096_s_at      | <i>dexS</i>                | <i>spy2096</i>             | 789           | 1175           | 1019           | 827            |

| Probe Set Name *        | Gene Name                               | Synonym                                 | Rank<br>0 min | Rank<br>30 min | Rank<br>60 min | Rank<br>90 min |
|-------------------------|-----------------------------------------|-----------------------------------------|---------------|----------------|----------------|----------------|
| SpM5_ChORF270b-541_x_at | <i>spyoM5_ChORF_270b10. p1t_541</i>     | <i>SpyoM5_ChORF_270b10 .p1t_541</i>     | 1314          | 1176           | 1165           | 1198           |
| SpM12_ChORF262-5_s_at   | <i>spyoM12_ChORF_262_5</i>              | <i>SpyoM12_ChORF_262_5</i>              | 1187          | 1177           | 582            | 670            |
| SpM1_ChORF1934_s_at     | <i>spy1934</i>                          | <i>spy1934</i>                          | 1243          | 1178           | 1273           | 1177           |
| SpM1_ChORF1743_s_at     | <i>accA</i>                             | <i>spy1743</i>                          | 131           | 1179           | 1140           | 858            |
| SpM1_ChORF0715_at       | <i>spy0715</i>                          | <i>spy0715</i>                          | 1204          | 1180           | 1045           | 1191           |
| SpM1_ChORF1287_s_at     | <i>spy1287</i>                          | <i>spy1287</i>                          | 1050          | 1181           | 878            | 761            |
| SpM1_ChORF2031_s_at     | <i>spy2031</i>                          | <i>spy2031</i>                          | 1098          | 1182           | 895            | 800            |
| SpM1_ChORF1172_s_at     | <i>satE</i>                             | <i>spy1172</i>                          | 1561          | 1183           | 1078           | 1092           |
| SpM1_ChORF1986_s_at     | <i>spy1986</i>                          | <i>spy1986</i>                          | 928           | 1184           | 167            | 195            |
| SpM1_ChORF1117_s_at     | <i>spy1117</i>                          | <i>spy1117</i>                          | 1262          | 1185           | 1378           | 1477           |
| SpM1_ChORF1768_s_at     | <i>spy1768</i>                          | <i>spy1768</i>                          | 1093          | 1186           | 988            | 766            |
| SpM12_ChORF212-2_s_at   | <i>spy0440</i>                          | <i>spy0440</i>                          | 880           | 1187           | 1261           | 1358           |
| SpM1_ChORF0768_s_at     | <i>pheS</i>                             | <i>spy0768</i>                          | 1094          | 1188           | 1221           | 1148           |
| SpM1_ChORF0600_s_at     | <i>spy0600</i>                          | <i>spy0600</i>                          | 1168          | 1189           | 1175           | 1101           |
| SpM1_ChORF0472_s_at     | <i>spy0472</i>                          | <i>spy0472</i>                          | 1074          | 1190           | 1212           | 1278           |
| SpM1_ChORF0238_s_at     | <i>spy0238</i>                          | <i>spy0238</i>                          | 1051          | 1191           | 1180           | 1171           |
| SpM1_ChORF0008_s_at     | <i>trcF</i>                             | <i>spy0008</i>                          | 1043          | 1192           | 1242           | 1300           |
| SpM1_ChORF1161_at       | <i>spy1161</i>                          | <i>spy1161</i>                          | 1216          | 1193           | 1277           | 1172           |
| SpM1_ChORF0197_s_at     | <i>nadC</i>                             | <i>spy0197</i>                          | 1618          | 1194           | 1385           | 1480           |
| SpM12_ChORF239-12_s_at  | <i>spy0012</i>                          | <i>spy0012</i>                          | 1234          | 1195           | 1350           | 1468           |
| SpM1_ChORF1575_s_at     | <i>spy1575</i>                          | <i>spy1575</i>                          | 1212          | 1196           | 1357           | 1312           |
| SpM1_ChORF1046_s_at     | <i>spy1046</i>                          | <i>spy1046</i>                          | 1105          | 1197           | 1103           | 1032           |
| SpM1_ChORF0365_s_at     | <i>spy0365</i>                          | <i>spy0365</i>                          | 1031          | 1198           | 1223           | 1448           |
| SpM1_ChORF2211_s_at     | <i>spy2211</i>                          | <i>spy2211</i>                          | 1301          | 1199           | 1161           | 1435           |
| SpM1_ChORF1198_s_at     | <i>spy1198</i>                          | <i>spy1198</i>                          | 1183          | 1200           | 1130           | 913            |
| SpM1_ChORF1363_s_at     | <i>spy1363</i>                          | <i>spy1363</i>                          | 1378          | 1201           | 1365           | 1457           |
| SpM1_ChORF1810_s_at     | <i>pmi</i>                              | <i>spy1810</i>                          | 820           | 1202           | 1199           | 1147           |
| SpM1_ChORF1863_s_at     | <i>spy1863</i>                          | <i>spy1863</i>                          | 1069          | 1203           | 1153           | 1067           |
| SpM1_ChORF1607_s_at     | <i>spy1607</i>                          | <i>spy1607</i>                          | 1063          | 1204           | 1267           | 1332           |
| SpM1_ChORF0237_s_at     | <i>spy0237</i>                          | <i>spy0237</i>                          | 1153          | 1205           | 1341           | 1389           |
| SpM12_ChORF217-1_at     | <i>spyoM12_ChORF_217_1</i>              | <i>SpyoM12_ChORF_217_1</i>              | 1197          | 1206           | 1209           | 1254           |
| SpM1_ChORF1791_s_at     | <i>spy1791</i>                          | <i>spy1791</i>                          | 1017          | 1207           | 1142           | 1149           |
| SpM1_ChORF1924_s_at     | <i>lacR.2</i>                           | <i>spy1924</i>                          | 1059          | 1208           | 1187           | 1247           |
| SpM1_ChORF1750_s_at     | <i>fabD</i>                             | <i>spy1750</i>                          | 146           | 1209           | 1133           | 889            |
| SpM1_ChORF0737_at       | <i>epf</i>                              | <i>spy0737</i>                          | 1391          | 1210           | 1128           | 1119           |
| SpM1_ChORF0622_s_at     | <i>spy0622</i>                          | <i>spy0622</i>                          | 1158          | 1211           | 1315           | 1263           |
| SpM1_ChORF1846_s_at     | <i>dinP</i>                             | <i>spy1846</i>                          | 1208          | 1212           | 1389           | 1398           |
| SpM1_ChORF0245_s_at     | <i>fasA</i>                             | <i>spy0245</i>                          | 1360          | 1213           | 1348           | 1331           |
| SpM1_ChORF1024_s_at     | <i>spy1024</i>                          | <i>spy1024</i>                          | 1231          | 1214           | 1091           | 1126           |
| SpM1_ChORF1921_s_at     | <i>lacC.2</i>                           | <i>spy1921</i>                          | 491           | 1215           | 1041           | 824            |
| SpM1_ChORF0016_s_at     | <i>spy0016</i>                          | <i>spy0016</i>                          | 1333          | 1216           | 1415           | 1458           |
| SpM5_ChORF4P31a-86_s_at | <i>spyoM5_ChORF_4P31a0 1.w2c2309_86</i> | <i>SpyoM5_ChORF_4P31a0 1.w2c2309_86</i> | 1119          | 1217           | 1266           | 1123           |
| SpM1_ChORF0552_s_at     | <i>spy0552</i>                          | <i>spy0552</i>                          | 1470          | 1218           | 1429           | 1429           |
| SpM1_ChORF1994_s_at     | <i>spy1994</i>                          | <i>spy1994</i>                          | 1140          | 1219           | 1205           | 1078           |
| SpM1_ChORF0352_s_at     | <i>spy0352</i>                          | <i>spy0352</i>                          | 710           | 1220           | 1228           | 1159           |
| SpM1_ChORF1250_s_at     | <i>mreA</i>                             | <i>spy1250</i>                          | 1087          | 1221           | 1320           | 1328           |
| SpM1_ChORF0479_at       | <i>spy0479</i>                          | <i>spy0479</i>                          | 1244          | 1222           | 1211           | 1049           |
| SpM18_ChORF1359_at      | <i>spyM18_1359</i>                      | <i>spyM18_1359</i>                      | 1136          | 1223           | 1160           | 1098           |
| SpM1_ChORF1604_s_at     | <i>spy1604</i>                          | <i>spy1604</i>                          | 738           | 1224           | 500            | 347            |
| SpM1_ChORF0133_at       | <i>spy0133</i>                          | <i>spy0133</i>                          | 1127          | 1225           | 1090           | 934            |
| SpM1_ChORF0314_s_at     | <i>spy0314</i>                          | <i>spy0314</i>                          | 1198          | 1226           | 1361           | 1352           |
| SpM1_ChORF1040_s_at     | <i>hemN, hemC</i>                       | <i>spy1040</i>                          | 1269          | 1227           | 1493           | 1649           |
| SpM1_ChORF0421_s_at     | <i>spy0421</i>                          | <i>spy0421</i>                          | 1174          | 1228           | 1250           | 1105           |
| SpM1_ChORF1665_s_at     | <i>pbpX</i>                             | <i>spy1664</i>                          | 1351          | 1229           | 1439           | 1403           |
| SpM1_ChORF1563_s_at     | <i>spy1563</i>                          | <i>spy1563</i>                          | 847           | 1230           | 715            | 477            |
| SpM1_ChORF2120_s_at     | <i>lmrP</i>                             | <i>spy2120</i>                          | 1275          | 1231           | 1318           | 1362           |
| SpM1_ChORF1290_s_at     | <i>spy1290</i>                          | <i>spy1290</i>                          | 1424          | 1232           | 1445           | 1596           |
| SpM1_ChORF1034_s_at     | <i>cobQ</i>                             | <i>spy1034</i>                          | 1151          | 1233           | 1327           | 1321           |

| Probe Set Name *        | Gene Name                  | Synonym                    | Rank<br>0 min | Rank<br>30 min | Rank<br>60 min | Rank<br>90 min |
|-------------------------|----------------------------|----------------------------|---------------|----------------|----------------|----------------|
| SpM1_ChORF1056_s_at     | <i>spy1056</i>             | <i>spy1056</i>             | 1200          | 1234           | 1308           | 1241           |
| SpM1_ChORF1897_s_at     | <i>spy1897</i>             | <i>spy1897</i>             | 1329          | 1235           | 1533           | 1697           |
| SpM1_ChORF0172_s_at     | <i>metB</i>                | <i>spy0172</i>             | 1320          | 1236           | 1102           | 1267           |
| SpM1_ChORF2199_s_at     | <i>spy2199</i>             | <i>spy2199</i>             | 1426          | 1237           | 1565           | 1704           |
| SpM1_ChORF1288_s_at     | <i>spy1288</i>             | <i>spy1288</i>             | 1177          | 1238           | 1295           | 1319           |
| SpM1_ChORF0007_s_at     | <i>pth</i>                 | <i>spy0007</i>             | 1385          | 1239           | 1405           | 1492           |
| SpM1_ChORF0498_s_at     | <i>spy0498</i>             | <i>spy0498</i>             | 1120          | 1240           | 1275           | 1298           |
| SpM1_ChORF0004_s_at     | <i>spy0004</i>             | <i>spy0004</i>             | 1353          | 1241           | 1423           | 1514           |
| SpM1_ChORF1656_s_at     | <i>aapA</i>                | <i>spy1654</i>             | 1358          | 1242           | 1408           | 1436           |
| SpM3_ChORF1072_s_at     | <i>spy1407</i>             | <i>spy1407</i>             | 1242          | 1243           | 1287           | 1251           |
| SpM1_ChORF2002_s_at     | <i>dppC</i>                | <i>spy2002</i>             | 1245          | 1244           | 1162           | 1056           |
| SpM1_ChORF0826_s_at     | <i>lsp</i>                 | <i>spy0826</i>             | 1325          | 1245           | 1398           | 1455           |
| SpM1_ChORF1505_s_at     | <i>phr</i>                 | <i>spy1505</i>             | 1222          | 1246           | 1243           | 1226           |
| SpM1_ChORF0550_s_at     | <i>spy0550</i>             | <i>spy0550</i>             | 1508          | 1247           | 1468           | 1521           |
| SpM1_ChORF1788_s_at     | <i>spy1788</i>             | <i>spy1788</i>             | 1252          | 1248           | 1316           | 1388           |
|                         | <i>spyoM12_ChORF_291_3</i> | <i>SpyoM12_ChORF_291_3</i> |               |                |                |                |
| SpM5_ChORF125g-189_s_at | 5                          | 5                          | 1135          | 1249           | 1300           | 1317           |
| SpM1_ChORF1565_s_at     | <i>spy1565</i>             | <i>spy1565</i>             | 896           | 1250           | 781            | 587            |
| SpM1_ChORF0442_s_at     | <i>spy0442</i>             | <i>spy0442</i>             | 1046          | 1251           | 845            | 857            |
| SpM1_ChORF1488_s_at     | <i>int2</i>                | <i>spy1488</i>             | 1306          | 1252           | 1234           | 1110           |
| SpM1_ChORF0796_s_at     | <i>spy0796</i>             | <i>spy0796</i>             | 1175          | 1253           | 1235           | 1343           |
| SpM1_ChORF0023_s_at     | <i>acpP.2</i>              | <i>spy0023</i>             | 1372          | 1254           | 1362           | 1525           |
| SpM1_ChORF0373_s_at     | <i>spy0373</i>             | <i>spy0373</i>             | 1359          | 1255           | 1407           | 1438           |
| SpM1_ChORF2173_s_at     | <i>spy2173</i>             | <i>spy2173</i>             | 661           | 1256           | 1121           | 1151           |
| SpM1_ChORF1115_s_at     | <i>spy1115</i>             | <i>spy1115</i>             | 1335          | 1257           | 1466           | 1562           |
| SpM1_ChORF1817_s_at     | <i>scrR</i>                | <i>spy1817</i>             | 1280          | 1258           | 1336           | 1327           |
| SpM1_ChORF1942_s_at     | <i>spy1942</i>             | <i>spy1942</i>             | 1434          | 1259           | 1413           | 1552           |
| SpM1_ChORF0853_s_at     | <i>fruR</i>                | <i>spy0853</i>             | 664           | 1260           | 943            | 1163           |
| SpM1_ChORF1159_s_at     | <i>hlyIII</i>              | <i>spy1159</i>             | 1067          | 1261           | 1236           | 1253           |
| SpyM3_1542_at           | <i>spyM3_1542</i>          | <i>SpyM3_1542</i>          | 1214          | 1262           | 1099           | 996            |
| SpM1_ChORF1541_s_at     | <i>arcC</i>                | <i>spy1541</i>             | 88            | 1263           | 561            | 121            |
| SpM1_ChORF1680_s_at     | <i>spy1680</i>             | <i>spy1680</i>             | 892           | 1264           | 409            | 373            |
| SpM1_ChORF1864_s_at     | <i>dnaQ</i>                | <i>spy1864</i>             | 1272          | 1265           | 1331           | 1248           |
|                         |                            |                            |               |                |                |                |
| SpM12_ChORF212-4_s_at   | <i>spyoM12_ChORF_212_4</i> | <i>SpyoM12_ChORF_212_4</i> | 1221          | 1266           | 1339           | 1318           |
| SpM1_ChORF1795_s_at     | <i>spy1795</i>             | <i>spy1795</i>             | 1089          | 1267           | 1252           | 1271           |
| SpM1_ChORF0771_s_at     | <i>spy0771</i>             | <i>spy0771</i>             | 1383          | 1268           | 1239           | 1301           |
| SpM1_ChORF1065_at       | <i>spy1065</i>             | <i>spy1065</i>             | 1274          | 1269           | 1280           | 1280           |
| SpM18_ChORF2160_s_at    | <i>mga</i>                 | <i>spyM18_2160</i>         | 1118          | 1270           | 1224           | 1006           |
| SpM1_ChORF2166_s_at     | <i>spy2166</i>             | <i>spy2166</i>             | 1277          | 1271           | 1176           | 1084           |
| SpM1_ChORF2118_s_at     | <i>tag</i>                 | <i>spy2118</i>             | 1176          | 1272           | 1245           | 1292           |
| SpM18_ChORF2202_s_at    | <i>spyM18_2202</i>         | <i>spyM18_2202</i>         | 1336          | 1273           | 1294           | 1209           |
| SpM1_ChORF1905_s_at     | <i>hsdS</i>                | <i>spy1905</i>             | 1249          | 1274           | 1225           | 1244           |
| SpM1_ChORF1082_at       | <i>srtK</i>                | <i>spy1082</i>             | 1350          | 1275           | 1443           | 1494           |
| SpM1_ChORF1113_s_at     | <i>spy1113</i>             | <i>spy1113</i>             | 1201          | 1276           | 395            | 398            |
| SpM1_ChORF0233_s_at     | <i>spy0233</i>             | <i>spy0233</i>             | 1376          | 1277           | 1349           | 1344           |
| SpM1_ChORF1634_s_at     | <i>spy1634</i>             | <i>spy1634</i>             | 1102          | 1278           | 1168           | 1106           |
| SpM1_ChORF1623_s_at     | <i>spy1623</i>             | <i>spy1623</i>             | 1388          | 1279           | 1309           | 1387           |
| SpM18_ChORF1309_s_at    | <i>spyM18_1309</i>         | <i>spyM18_1309</i>         | 1281          | 1280           | 1219           | 1079           |
|                         | <i>spyoM12_ChORF_299_1</i> | <i>SpyoM12_ChORF_299_1</i> |               |                |                |                |
| SpM12_ChORF299-11_at    | 1                          | 1                          | 1506          | 1281           | 1230           | 1523           |
| SpM1_ChORF0917_s_at     | <i>spy0917</i>             | <i>spy0917</i>             | 1313          | 1282           | 1333           | 1259           |
| SpM1_ChORF1298_at       | <i>malA</i>                | <i>spy1298</i>             | 977           | 1283           | 661            | 161            |
| M12_0090_s_at           | M12_0090                   | M12_0090                   | 1327          | 1284           | 1455           | 1569           |
| SpM18_ChORF0618_s_at    | <i>spy0553</i>             | <i>spy0553</i>             | 1447          | 1285           | 1400           | 1406           |
|                         | <i>spyoM12_ChORF_299_1</i> | <i>SpyoM12_ChORF_299_1</i> |               |                |                |                |
| SpM12_ChORF299-15_at    | 5                          | 5                          | 1033          | 1286           | 1063           | 814            |
| SpM18_ChORF1340_at      | <i>int</i>                 | <i>spyM18_1340</i>         | 1192          | 1287           | 1312           | 1269           |
| SpM1_ChORF0742_s_at     | <i>sagE</i>                | <i>spy0742</i>             | 1384          | 1288           | 506            | 354            |
| SpM1_ChORF2165_s_at     | <i>spy2165</i>             | <i>spy2165</i>             | 1338          | 1289           | 1293           | 1262           |
| SpM1_ChORF1464_s_at     | <i>spy1464</i>             | <i>spy1464</i>             | 763           | 1290           | 1163           | 1009           |
| SpM1_ChORF0480_at       | <i>spy0480</i>             | <i>spy0480</i>             | 1299          | 1291           | 1257           | 1164           |

| Probe Set Name *       | Gene Name                  | Synonym                    | Rank<br>0 min | Rank<br>30 min | Rank<br>60 min | Rank<br>90 min |
|------------------------|----------------------------|----------------------------|---------------|----------------|----------------|----------------|
| SpM1_ChORF1586_s_at    | <i>lacZ</i>                | <i>spy1586</i>             | 1290          | 1292           | 810            | 614            |
| SpM1_ChORF1561_s_at    | <i>spy1561</i>             | <i>spy1561</i>             | 1011          | 1293           | 975            | 693            |
| SpM1_ChORF1973_at      | <i>dexB</i>                | <i>spy1973</i>             | 980           | 1294           | 312            | 374            |
| SpM1_ChORF1908_s_at    | <i>salR</i>                | <i>spy1908</i>             | 1310          | 1295           | 1321           | 1224           |
| SpM1_ChORF1584_s_at    | <i>aroE</i>                | <i>spy1584</i>             | 1250          | 1296           | 1217           | 1111           |
| SpM1_ChORF0527_s_at    | <i>spy0527</i>             | <i>spy0527</i>             | 1410          | 1297           | 1422           | 1437           |
|                        | <i>spyoM12_ChORF_299_5</i> | <i>SpyoM12_ChORF_299_5</i> |               |                |                |                |
| SpM12_ChORF299-52_s_at | 2                          | 2                          | 1343          | 1298           | 1470           | 1531           |
| SpM1_ChORF1564_s_at    | <i>spy1564</i>             | <i>spy1564</i>             | 936           | 1299           | 748            | 512            |
| SpM1_ChORF0627_at      | <i>regR</i>                | <i>spy0627</i>             | 1397          | 1300           | 1414           | 1486           |
| SpM1_ChORF0227_s_at    | <i>spy0227</i>             | <i>spy0227</i>             | 1448          | 1301           | 1401           | 1370           |
| SpM1_ChORF1562_s_at    | <i>spy1562</i>             | <i>spy1562</i>             | 903           | 1302           | 835            | 551            |
| SpM1_ChORF1016_s_at    | <i>spy1016</i>             | <i>spy1016</i>             | 1458          | 1303           | 1314           | 1447           |
| SpM1_ChORF1138_s_at    | <i>spy1138</i>             | <i>spy1138</i>             | 1232          | 1304           | 1390           | 1393           |
| SpM1_ChORF2007_s_at    | <i>lmb</i>                 | <i>spy2007</i>             | 1226          | 1305           | 1337           | 1196           |
| SpM1_ChORF0999_at      | <i>spy0999</i>             | <i>spy0999</i>             | 1373          | 1306           | 1197           | 1033           |
| SpM1_ChORF1794_s_at    | <i>spy1794</i>             | <i>spy1794</i>             | 1068          | 1307           | 1208           | 1194           |
| SpM1_ChORF1552_s_at    | <i>spy1552</i>             | <i>spy1552</i>             | 1267          | 1308           | 1214           | 1136           |
| SpM1_ChORF2042_s_at    | <i>rgg</i>                 | <i>spy2042</i>             | 1540          | 1309           | 1382           | 1532           |
| SpM1_ChORF2164_s_at    | <i>spy2164</i>             | <i>spy2164</i>             | 1342          | 1310           | 1329           | 1293           |
| SpM1_ChORF0484_s_at    | <i>spy0484</i>             | <i>spy0484</i>             | 1377          | 1311           | 1399           | 1414           |
| SpM3_ChORF0972_at      | <i>spyM3_0972</i>          | <i>SpyM3_0972</i>          | 1257          | 1312           | 1244           | 1108           |
| SpM1_ChORF0627_s_at    | <i>regR</i>                | <i>spyM18_0692</i>         | 1466          | 1313           | 1392           | 1483           |
|                        |                            |                            |               |                |                |                |
| SpM12_ChORF236-7_s_at  | <i>spyoM12_ChORF_236_7</i> | <i>SpyoM12_ChORF_236_7</i> | 984           | 1314           | 1487           | 1491           |
| SpM1_ChORF1291_s_at    | <i>glgP</i>                | <i>spy1291</i>             | 997           | 1315           | 569            | 671            |
| SpM1_ChORF0370_s_at    | <i>spy0370</i>             | <i>spy0370</i>             | 1247          | 1316           | 1325           | 1533           |
| SpM1_ChORF1616_s_at    | <i>comFA</i>               | <i>spy1616</i>             | 1298          | 1317           | 1344           | 1287           |
| SpM18_ChORF0626_s_at   | <i>spy0560</i>             | <i>spy0560</i>             | 1292          | 1318           | 1313           | 1342           |
| SpM1_ChORF2047_s_at    | <i>gldA</i>                | <i>spy2047</i>             | 1144          | 1319           | 128            | 60             |
| SpM1_ChORF1297_at      | <i>spy1297</i>             | <i>spy1297</i>             | 1436          | 1320           | 717            | 734            |
| SpM1_ChORF1017_x_at    | <i>spy1017</i>             | <i>spy1017</i>             | 1382          | 1321           | 1247           | 1404           |
| SpM1_ChORF1915_at      | <i>salA</i>                | <i>spy1915</i>             | 1054          | 1322           | 1342           | 1115           |
| SpM1_ChORF0021_s_at    | <i>spy0021</i>             | <i>spy0021</i>             | 1440          | 1323           | 1479           | 1627           |
| SpM1_ChORF1155_s_at    | <i>spy1155</i>             | <i>spy1155</i>             | 1433          | 1324           | 1379           | 1476           |
| SpM1_ChORF1542_s_at    | <i>spy1542</i>             | <i>spy1542</i>             | 104           | 1325           | 630            | 160            |
| SpM1_ChORF1237_s_at    | <i>ciaR</i>                | <i>spy1237</i>             | 1173          | 1326           | 1364           | 1360           |
| SpM1_ChORF1124_s_at    | <i>spy1124</i>             | <i>spy1124</i>             | 1569          | 1327           | 1501           | 1583           |
| SpM1_ChORF1548_s_at    | <i>spy1548</i>             | <i>spy1548</i>             | 1040          | 1328           | 1056           | 1099           |
| SpM1_ChORF1587_s_at    | <i>lytR</i>                | <i>spy1587</i>             | 1446          | 1329           | 1081           | 1001           |
| SpM1_ChORF0558_s_at    | <i>spy0558</i>             | <i>spy0558</i>             | 1386          | 1330           | 1391           | 1336           |
| SpM1_ChORF1063_at      | <i>spy1063</i>             | <i>spy1063</i>             | 1134          | 1331           | 1307           | 1243           |
| SpM1_ChORF0856_s_at    | <i>mur1.1</i>              | <i>spy0856</i>             | 1334          | 1332           | 1363           | 1364           |
| SpM1_ChORF1131_s_at    | <i>spy1131</i>             | <i>spy1131</i>             | 1402          | 1333           | 1556           | 1602           |
| SpM1_ChORF1813_at      | <i>endoS</i>               | <i>spy1813</i>             | 969           | 1334           | 907            | 433            |
| SpM1_ChORF0770_s_at    | <i>spy0770</i>             | <i>spy0770</i>             | 1438          | 1335           | 1343           | 1443           |
| SpM1_ChORF2209_s_at    | <i>spy2209</i>             | <i>spy2209</i>             | 1474          | 1336           | 1564           | 1710           |
| SpM1_ChORF2048_s_at    | <i>mipB</i>                | <i>spy2048</i>             | 1302          | 1337           | 257            | 164            |
| SpM1_ChORF1935_s_at    | <i>spy1935</i>             | <i>spy1935</i>             | 1323          | 1338           | 1354           | 1273           |
| SpM1_ChORF0488_s_at    | <i>spy0488</i>             | <i>spy0488</i>             | 1374          | 1339           | 1395           | 1418           |
| SpM1_ChORF0640_s_at    | <i>spy0640</i>             | <i>spy0640</i>             | 1284          | 1340           | 1335           | 1372           |
| SpM1_ChORF0766_s_at    | <i>endA</i>                | <i>spy0766</i>             | 1321          | 1341           | 1346           | 1316           |
| SpM1_ChORF1903_s_at    | <i>spy1903</i>             | <i>spy1903</i>             | 1427          | 1342           | 1508           | 1566           |
| SpM1_ChORF0207_s_at    | <i>spy0207</i>             | <i>spy0207</i>             | 1444          | 1343           | 1474           | 1394           |
| SpM1_ChORF1602_s_at    | <i>spy1602</i>             | <i>spy1602</i>             | 973           | 1344           | 786            | 713            |
| SpM12_ChORF284-30_s_at | <i>spy1061</i>             | <i>spy1061</i>             | 1045          | 1345           | 1323           | 1238           |
| SpM1_ChORF0385_s_at    | <i>fhuD</i>                | <i>spy0385</i>             | 1514          | 1346           | 1531           | 1687           |
| SpM1_ChORF1257_s_at    | <i>spy1257</i>             | <i>spy1257</i>             | 1344          | 1347           | 1360           | 1315           |
| SpM1_ChORF0433_at      | <i>spy0433</i>             | <i>spy0433</i>             | 1366          | 1348           | 1504           | 1558           |
| SpM1_ChORF1189_s_at    | <i>citF</i>                | <i>spy1189</i>             | 1092          | 1349           | 933            | 939            |
| SpM1_ChORF1047_s_at    | <i>spy1047</i>             | <i>spy1047</i>             | 1371          | 1350           | 1380           | 1330           |
| SpM1_ChORF0009_s_at    | <i>spy0009</i>             | <i>spy0009</i>             | 1346          | 1351           | 1512           | 1541           |

| Probe Set Name *       | Gene Name                  | Synonym                    | Rank<br>0 min | Rank<br>30 min | Rank<br>60 min | Rank<br>90 min |
|------------------------|----------------------------|----------------------------|---------------|----------------|----------------|----------------|
| SpM1_ChORF1783_s_at    | <i>spy1783</i>             | <i>spy1783</i>             | 1445          | 1352           | 1519           | 1606           |
| SpM1_ChORF1107_s_at    | <i>spy1107</i>             | <i>spy1107</i>             | 1468          | 1353           | 1420           | 1399           |
| SpM1_ChORF1062_s_at    | <i>yesM</i>                | <i>spy1062</i>             | 999           | 1354           | 1274           | 1121           |
| SpM1_ChORF0533_s_at    | <i>spy0533</i>             | <i>spy0533</i>             | 1652          | 1355           | 1386           | 1357           |
| SpM1_ChORF1815_s_at    | <i>scrA</i>                | <i>spy1815</i>             | 1223          | 1356           | 1284           | 1143           |
| SpM1_ChORF0251_s_at    | <i>spy0251</i>             | <i>spy0251</i>             | 1186          | 1357           | 477            | 444            |
| SpM1_ChORF2176_s_at    | <i>spy2176</i>             | <i>spy2176</i>             | 1303          | 1358           | 1403           | 1277           |
| SpM1_ChORF2004_s_at    | <i>dppE</i>                | <i>spy2004</i>             | 1409          | 1359           | 1412           | 1383           |
|                        | <i>spyoM12_ChORF_299_5</i> | <i>SpyoM12_ChORF_299_5</i> |               |                |                |                |
| SpM12_ChORF299-57_s_at | 7                          | 7                          | 1395          | 1360           | 1464           | 1497           |
| SpM1_ChORF1793_s_at    | <i>spy1793</i>             | <i>spy1793</i>             | 1289          | 1361           | 1370           | 1441           |
| SpM1_ChORF1163_s_at    | <i>smf</i>                 | <i>spy1163</i>             | 1354          | 1362           | 1427           | 1409           |
| SpM1_ChORF0095_s_at    | <i>spy0095</i>             | <i>spy0095</i>             | 1495          | 1363           | 1498           | 1628           |
| SpM1_ChORF0191_at      | <i>spy0191</i>             | <i>spy0191</i>             | 1364          | 1364           | 1358           | 1203           |
| SpM1_ChORF1811_s_at    | <i>scrK</i>                | <i>spy1811</i>             | 1316          | 1365           | 1394           | 1205           |
| SpM1_ChORF1916_s_at    | <i>lacG</i>                | <i>spy1916</i>             | 1023          | 1366           | 1372           | 1206           |
| SpM1_ChORF1556_s_at    | <i>spy1556</i>             | <i>spy1556</i>             | 1317          | 1367           | 1196           | 1258           |
| SpM1_ChORF1160_s_at    | <i>spy1160</i>             | <i>spy1160</i>             | 1161          | 1368           | 1351           | 1373           |
| SpM1_ChORF1174_s_at    | <i>oadA</i>                | <i>spy1174</i>             | 1457          | 1369           | 1567           | 1744           |
| SpM1_ChORF1106_s_at    | <i>spy1106</i>             | <i>spy1106</i>             | 1442          | 1370           | 1376           | 1335           |
| SpM1_ChORF1879_s_at    | <i>spy1879</i>             | <i>spy1879</i>             | 1356          | 1371           | 1526           | 1641           |
| SpM1_ChORF2215_s_at    | <i>spy2215</i>             | <i>spy2215</i>             | 1390          | 1372           | 1416           | 1504           |
| SpM1_ChORF1293_s_at    | <i>malR</i>                | <i>spy1293</i>             | 1430          | 1373           | 1375           | 1350           |
| SpM1_ChORF1058_s_at    | <i>ptsB</i>                | <i>spy1058</i>             | 199           | 1374           | 632            | 254            |
| SpM1_ChORF0496_s_at    | <i>mutR</i>                | <i>spy0496</i>             | 1451          | 1375           | 1536           | 1600           |
| SpM18_ChORF1719_s_at   | <i>trxB</i>                | <i>spyM18_1719</i>         | 704           | 1376           | 1032           | 666            |
| SpM1_ChORF1603_s_at    | <i>spy1603</i>             | <i>spy1603</i>             | 1008          | 1377           | 914            | 731            |
| SpM1_ChORF2162_s_at    | <i>cadD</i>                | <i>spy2162</i>             | 1421          | 1378           | 1418           | 1434           |
| SpM1_ChORF1710_s_at    | <i>spy1710</i>             | <i>spy1710</i>             | 457           | 1379           | 775            | 488            |
| SpM1_ChORF1210_s_at    | <i>spy1210</i>             | <i>spy1210</i>             | 1520          | 1380           | 1473           | 1469           |
| SpM1_ChORF0384_s_at    | <i>fhuB.1</i>              | <i>spy0384</i>             | 1475          | 1381           | 1511           | 1621           |
| SpM1_ChORF1018_s_at    | <i>spy1018</i>             | <i>spy1018</i>             | 1431          | 1382           | 1296           | 1428           |
| SpM18_ChORF1077_s_at   | <i>spyM18_1077</i>         | <i>spyM18_1077</i>         | 1531          | 1383           | 1648           | 1757           |
| SpM18_ChORF1348_x_at   | <i>spyM18_1348</i>         | <i>spyM18_1348</i>         | 1453          | 1384           | 1388           | 1384           |
| SpM1_ChORF1796_s_at    | <i>shp</i>                 | <i>spy1796</i>             | 1287          | 1385           | 1441           | 1488           |
| SpM1_ChORF1956_s_at    | <i>spy1956</i>             | <i>spy1956</i>             | 1416          | 1386           | 1451           | 1338           |
| SpM1_ChORF2066_s_at    | <i>spy2066</i>             | <i>spy2066</i>             | 1138          | 1387           | 669            | 665            |
|                        | <i>spyoM12_ChORF_299_6</i> | <i>SpyoM12_ChORF_299_6</i> |               |                |                |                |
| SpM12_ChORF299-66_at   | 6                          | 6                          | 1512          | 1388           | 1450           | 1376           |
| SpM1_ChORF2172_s_at    | <i>spy2172</i>             | <i>spy2172</i>             | 799           | 1389           | 1238           | 1250           |
| SpM1_ChORF1177_s_at    | <i>spy1177</i>             | <i>spy1177</i>             | 1379          | 1390           | 1459           | 1578           |
| SpM1_ChORF1329_s_at    | <i>spy1329</i>             | <i>spy1329</i>             | 1584          | 1391           | 1546           | 1564           |
| SpM1_ChORF2190_s_at    | <i>sdhA</i>                | <i>spy2190</i>             | 1268          | 1392           | 774            | 830            |
| SpM3_ChORF0788_s_at    | <i>spyM18_1090</i>         | <i>spyM18_1090</i>         | 1258          | 1393           | 1431           | 1426           |
| SpM1_ChORF1566_s_at    | <i>spy1566</i>             | <i>spy1566</i>             | 1288          | 1394           | 1169           | 1153           |
| SpM18_ChORF2039_s_at   | <i>spyM18_2039</i>         | <i>spyM18_2039</i>         | 1095          | 1395           | 390            | 472            |
| SpM1_ChORF1190_s_at    | <i>citX</i>                | <i>spy1190</i>             | 1014          | 1396           | 834            | 778            |
| SpM1_ChORF1233_s_at    | <i>coaA</i>                | <i>spy1233</i>             | 1541          | 1397           | 1602           | 1731           |
| SpM18_ChORF0135_s_at   | <i>spyM18_0135</i>         | <i>spyM18_0135</i>         | 1369          | 1398           | 606            | 902            |
| SpM1_ChORF1637_s_at    | <i>atoB</i>                | <i>spy1637</i>             | 1337          | 1399           | 1485           | 1585           |
|                        | <i>spyoM12_ChORF_299_6</i> | <i>SpyoM12_ChORF_299_6</i> |               |                |                |                |
| SpM12_ChORF299-65_at   | 5                          | 5                          | 1585          | 1400           | 1503           | 1473           |
| SpM1_ChORF1926_s_at    | <i>spy1926</i>             | <i>spy1926</i>             | 1532          | 1401           | 1488           | 1498           |
| SpM1_ChORF0729_s_at    | <i>spy0729</i>             | <i>spy0729</i>             | 1493          | 1402           | 1622           | 1769           |
| SpM1_ChORF1295_s_at    | <i>malF</i>                | <i>spy1295</i>             | 1533          | 1403           | 737            | 973            |
| SpM1_ChORF1567_s_at    | <i>spy1567</i>             | <i>spy1567</i>             | 1219          | 1404           | 1131           | 1096           |
| SpM1_ChORF1292_s_at    | <i>malM</i>                | <i>spy1292</i>             | 1304          | 1405           | 1037           | 1097           |
| SpM18_ChORF0547_s_at   | <i>silD</i>                | <i>spyM18_0547</i>         | 1296          | 1406           | 1271           | 1197           |
| SpM1_ChORF0542_s_at    | <i>spy0542</i>             | <i>spy0542</i>             | 1526          | 1407           | 1419           | 1452           |
|                        | <i>spyoM12_ChORF_251_7</i> | <i>SpyoM12_ChORF_251_7</i> |               |                |                |                |
| SpM12_ChORF251-7_at    |                            |                            | 1590          | 1408           | 1476           | 1430           |
| SpM1_ChORF1188_s_at    | <i>citE</i>                | <i>spy1188</i>             | 1121          | 1409           | 987            | 1040           |

| Probe Set Name *        | Gene Name                   | Synonym                    | Rank<br>0 min | Rank<br>30 min | Rank<br>60 min | Rank<br>90 min |
|-------------------------|-----------------------------|----------------------------|---------------|----------------|----------------|----------------|
| SpM1_ChORF1180_s_at     | <i>spy1180</i>              | <i>spy1180</i>             | 1332          | 1410           | 1411           | 1365           |
| SpM1_ChORF1039_s_at     | <i>spy1039</i>              | <i>spy1039</i>             | 1361          | 1411           | 1514           | 1692           |
| SpM1_ChORF1184_s_at     | <i>oadB</i>                 | <i>spy1184</i>             | 1206          | 1412           | 1340           | 1422           |
| SpM1_ChORF0572_s_at     | <i>spy0572</i>              | <i>spy0572</i>             | 1341          | 1413           | 1069           | 1050           |
| SpM1_ChORF2001_s_at     | <i>dppB</i>                 | <i>spy2001</i>             | 1455          | 1414           | 1481           | 1522           |
| SpM3_ChORF0181_s_at     | <i>cbp</i>                  | <i>SpyM3_0181</i>          | 1307          | 1415           | 554            | 345            |
| SpM1_ChORF1588_s_at     | <i>lytS</i>                 | <i>spy1588</i>             | 1555          | 1416           | 1377           | 1306           |
| SpM1_ChORF1592_s_at     | <i>spy1592</i>              | <i>spy1592</i>             | 1259          | 1417           | 805            | 327            |
| SpM1_ChORF0383_s_at     | <i>fhuG</i>                 | <i>spy0383</i>             | 1484          | 1418           | 1472           | 1593           |
| SpM3_ChORF0976_s_at     | <i>spyM3_0976</i>           | <i>SpyM3_0976</i>          | 1413          | 1419           | 1291           | 1272           |
| SpM3_ChORF0341_s_at     | <i>spyM3_0341</i>           | <i>SpyM3_0341</i>          | 1305          | 1420           | 1281           | 1218           |
|                         | <i>spyoM5_ChORF_169a5.p</i> | <i>SpyoM5_ChORF_169a5.</i> |               |                |                |                |
| SpM5_ChORF169a-188_s_at | <i>1t_188</i>               | <i>p1t_188</i>             | 1348          | 1421           | 1371           | 1366           |
| SpM18_ChORF1305_s_at    | <i>spyM18_1305</i>          | <i>spyM18_1305</i>         | 1423          | 1422           | 1288           | 1282           |
| SpM1_ChORF0539_s_at     | <i>spy0539</i>              | <i>spy0539</i>             | 1510          | 1423           | 1442           | 1520           |
| SpM1_ChORF1437_s_at     | <i>spy1437</i>              | <i>spy1437</i>             | 1322          | 1424           | 1264           | 1232           |
| SpM1_ChORF1111_s_at     | <i>spy1111</i>              | <i>spy1111</i>             | 1239          | 1425           | 1124           | 910            |
| SpM18_ChORF1620_x_at    | <i>spyM18_1620</i>          | <i>spyM18_1620</i>         | 1553          | 1426           | 1638           | 1766           |
|                         |                             |                            |               |                |                |                |
| SpM12_ChORF221-2_s_at   | <i>spyoM12_ChORF_221_2</i>  | <i>SpyoM12_ChORF_221_2</i> | 1139          | 1427           | 1317           | 1088           |
| SpM1_ChORF0196_s_at     | <i>spy0196</i>              | <i>spy0196</i>             | 1734          | 1428           | 1305           | 1303           |
|                         | <i>spyoM12_ChORF_289_1</i>  | <i>SpyoM12_ChORF_289_1</i> |               |                |                |                |
| SpM12_ChORF289-13_s_at  | <i>3</i>                    | <i>3</i>                   | 1330          | 1429           | 1430           | 1322           |
| SpM18_ChORF0544_s_at    | <i>spyM18_0544</i>          | <i>spyM18_0544</i>         | 1417          | 1430           | 1446           | 1395           |
| SpM1_ChORF0723_at       | <i>spy0723</i>              | <i>spy0723</i>             | 1407          | 1431           | 1477           | 1453           |
| SpM1_ChORF0636_s_at     | <i>idnO</i>                 | <i>spy0636</i>             | 1394          | 1432           | 1353           | 1311           |
| SpM1_ChORF0574_s_at     | <i>bgIA</i>                 | <i>spy0574</i>             | 1443          | 1433           | 1178           | 1036           |
| SpM1_ChORF1911_s_at     | <i>salY</i>                 | <i>spy1911</i>             | 1501          | 1434           | 1559           | 1581           |
| SpM1_ChORF1060_s_at     | <i>ptsD</i>                 | <i>spy1060</i>             | 254           | 1435           | 865            | 382            |
| SpM1_ChORF2152_s_at     | <i>spy2152</i>              | <i>spy2152</i>             | 1396          | 1436           | 1345           | 1377           |
| SpM18_ChORF0701_s_at    | <i>spy0638</i>              | <i>spy0638</i>             | 1352          | 1437           | 1299           | 1219           |
| SpM1_ChORF0010_s_at     | <i>divIC</i>                | <i>spy0010</i>             | 1449          | 1438           | 1591           | 1675           |
| M12_0089_s_at           | <i>M12_0089</i>             | <i>M12_0089</i>            | 1489          | 1439           | 1535           | 1608           |
| SpM1_ChORF1048_s_at     | <i>spy1048</i>              | <i>spy1048</i>             | 1347          | 1440           | 1366           | 1284           |
| SpM1_ChORF1049_s_at     | <i>spy1049</i>              | <i>spy1049</i>             | 1404          | 1441           | 1453           | 1397           |
| SpM1_ChORF1927_s_at     | <i>spy1927</i>              | <i>spy1927</i>             | 1551          | 1442           | 1489           | 1509           |
| SpM1_ChORF0733_at       | <i>spy0733</i>              | <i>spy0733</i>             | 1529          | 1443           | 1204           | 1249           |
| SpM1_ChORF1175_s_at     | <i>spy1175</i>              | <i>spy1175</i>             | 1482          | 1444           | 1569           | 1707           |
| M12_0965_at             | <i>M12_0965</i>             | <i>M12_0965</i>            | 1511          | 1445           | 1338           | 1309           |
| SpM1_ChORF1647_s_at     | <i>spy1647</i>              | <i>spy1647</i>             | 1494          | 1446           | 1624           | 1646           |
| SpM1_ChORF1366_s_at     | <i>spy1366</i>              | <i>spy1366</i>             | 1547          | 1447           | 1617           | 1720           |
| SpM1_ChORF1385_s_at     | <i>spy1385</i>              | <i>spy1385</i>             | 1387          | 1448           | 1200           | 1058           |
| SpM1_ChORF1412_s_at     | <i>spy1412</i>              | <i>spy1412</i>             | 1464          | 1449           | 1518           | 1515           |
| SpM1_ChORF0538_s_at     | <i>metK</i>                 | <i>spy0538</i>             | 1537          | 1450           | 1467           | 1568           |
| SpM1_ChORF1972_s_at     | <i>pulA</i>                 | <i>spy1972</i>             | 1319          | 1451           | 874            | 771            |
| SpM1_ChORF1683_s_at     | <i>glpO</i>                 | <i>spy1683</i>             | 1345          | 1452           | 1137           | 668            |
| SpM1_ChORF0801_s_at     | <i>spy0801</i>              | <i>spy0801</i>             | 1695          | 1453           | 1649           | 1620           |
| SpM1_ChORF1176_s_at     | <i>spy1176</i>              | <i>spy1176</i>             | 1456          | 1454           | 1555           | 1605           |
| SpM1_ChORF1205_s_at     | <i>spy1205</i>              | <i>spy1205</i>             | 1419          | 1455           | 1495           | 1454           |
| SpM1_ChORF0252_s_at     | <i>spy0252</i>              | <i>spy0252</i>             | 1273          | 1456           | 438            | 288            |
| SpM1_ChORF2052_s_at     | <i>spy2052</i>              | <i>spy2052</i>             | 1326          | 1457           | 1141           | 1125           |
| SpM18_ChORF1979_s_at    | <i>spyM18_1979</i>          | <i>spyM18_1979</i>         | 1554          | 1458           | 1550           | 1565           |
| SpM1_ChORF1753_s_at     | <i>acpP</i>                 | <i>spy1753</i>             | 611           | 1459           | 1460           | 1442           |
|                         | <i>spyoM12_ChORF_299_6</i>  | <i>SpyoM12_ChORF_299_6</i> |               |                |                |                |
| SpM12_ChORF299-60_at    | <i>0</i>                    | <i>0</i>                   | 1557          | 1460           | 1543           | 1548           |
| SpM1_ChORF0386_s_at     | <i>fhuA</i>                 | <i>spy0386</i>             | 1628          | 1461           | 1631           | 1799           |
|                         | <i>spyoM12_ChORF_299_5</i>  | <i>SpyoM12_ChORF_299_5</i> |               |                |                |                |
| SpM12_ChORF299-58_s_at  | <i>8</i>                    | <i>8</i>                   | 1471          | 1462           | 1566           | 1547           |
| SpM1_ChORF1170_s_at     | <i>ddh</i>                  | <i>spy1170</i>             | 1393          | 1463           | 1496           | 1402           |
| SpM1_ChORF1641_s_at     | <i>spy1641</i>              | <i>spy1641</i>             | 1415          | 1464           | 1410           | 1419           |
|                         | <i>spyoM12_ChORF_299_6</i>  | <i>SpyoM12_ChORF_299_6</i> |               |                |                |                |
| SpM12_ChORF299-64_at    | <i>4</i>                    | <i>4</i>                   | 1560          | 1465           | 1513           | 1456           |



| Probe Set Name *        | Gene Name                               | Synonym                                 | Rank<br>0 min | Rank<br>30 min | Rank<br>60 min | Rank<br>90 min |
|-------------------------|-----------------------------------------|-----------------------------------------|---------------|----------------|----------------|----------------|
| SpM1_ChORF0492_s_at     | <i>spy0492</i>                          | <i>spy0492</i>                          | 1481          | 1466           | 1438           | 1381           |
| SpM1_ChORF2013_s_at     | <i>tnp</i>                              | <i>spy2013</i>                          | 409           | 1467           | 1184           | 1055           |
| SpM12_ChORF299-55_s_at  | <i>spyoM12_ChORF_299_5</i>              | <i>SpyoM12_ChORF_299_5</i>              |               |                |                |                |
|                         | 5                                       | 5                                       | 1497          | 1468           | 1605           | 1599           |
| SpM49_ChORF356-2_s_at   | <i>spyoM49_ChORF_sp001_0_356_2</i>      | <i>SpyoM49_ChORF_sp001_0_356_2</i>      | 339           | 1469           | 904            | 426            |
| SpM12_ChORF299-62_at    | 2                                       | 2                                       | 1612          | 1470           | 1562           | 1545           |
| SpM1_ChORF1638_s_at     | <i>atoD.1</i>                           | <i>spy1638</i>                          | 1389          | 1471           | 1541           | 1654           |
| SpM12_ChORF299-39_s_at  | <i>spyoM12_ChORF_299_3</i>              | <i>SpyoM12_ChORF_299_3</i>              |               |                |                |                |
|                         | 9                                       | 9                                       | 1380          | 1472           | 1486           | 1378           |
| SpM1_ChORF0637_s_at     | <i>spy0637</i>                          | <i>spy0637</i>                          | 1425          | 1473           | 1426           | 1380           |
| SpM1_ChORF0531_s_at     | <i>acpA</i>                             | <i>spy0531</i>                          | 1315          | 1474           | 1703           | 1866           |
| SpM1_ChORF0219_x_at     | <i>spy0219</i>                          | <i>spy0219</i>                          | 1278          | 1475           | 1432           | 1302           |
| M12_2021_x_at           | M12_2021                                | M12_2021                                | 1398          | 1476           | 1480           | 1440           |
| SpM1_ChORF2050_s_at     | <i>spyM18_2111</i>                      | <i>spyM18_2111</i>                      | 1405          | 1477           | 1232           | 1076           |
| SpM12_ChORF299-59_s_at  | <i>spyoM12_ChORF_299_5</i>              | <i>SpyoM12_ChORF_299_5</i>              |               |                |                |                |
|                         | 9                                       | 9                                       | 1505          | 1478           | 1575           | 1576           |
| SpM12_ChORF299-43_at    | <i>spyoM12_ChORF_299_4</i>              | <i>SpyoM12_ChORF_299_4</i>              |               |                |                |                |
|                         | 3                                       | 3                                       | 1375          | 1479           | 1456           | 1345           |
| SpM1_ChORF1640_s_at     | <i>spy1640</i>                          | <i>spy1640</i>                          | 1400          | 1480           | 1458           | 1538           |
| SpM1_ChORF0510_s_at     | <i>spy0510</i>                          | <i>spy0510</i>                          | 1556          | 1481           | 1553           | 1660           |
| SpM12_ChORF299-53_s_at  | <i>spyoM12_ChORF_299_5</i>              | <i>SpyoM12_ChORF_299_5</i>              |               |                |                |                |
|                         | 3                                       | 3                                       | 1525          | 1482           | 1597           | 1595           |
| SpM1_ChORF1543_s_at     | <i>spy1543</i>                          | <i>spy1543</i>                          | 149           | 1483           | 788            | 275            |
| SpM1_ChORF1183_s_at     | <i>spy1183</i>                          | <i>spy1183</i>                          | 1312          | 1484           | 1387           | 1446           |
| SpM1_ChORF1684_s_at     | <i>glpK</i>                             | <i>spy1684</i>                          | 1362          | 1485           | 1233           | 888            |
| SpM12_ChORF299-61_s_at  | <i>spyoM12_ChORF_299_6</i>              | <i>SpyoM12_ChORF_299_6</i>              |               |                |                |                |
|                         | 1                                       | 1                                       | 1605          | 1486           | 1589           | 1570           |
| SpM1_ChORF1209_s_at     | <i>pdxK</i>                             | <i>spy1209</i>                          | 1577          | 1487           | 1540           | 1546           |
| SpM1_ChORF0489_s_at     | <i>spy0489</i>                          | <i>spy0489</i>                          | 1459          | 1488           | 1500           | 1500           |
| SpM18_ChORF0633_s_at    | <i>spyM18_0633</i>                      | <i>spyM18_0633</i>                      | 1486          | 1489           | 1494           | 1543           |
| SpM5_ChORF4P31a-19_s_at | <i>spyoM5_ChORF_4P31a0_1.w2c2309_19</i> | <i>SpyoM5_ChORF_4P31a0_1.w2c2309_19</i> | 1504          | 1490           | 1461           | 1597           |
| SpM12_ChORF299-56_s_at  | <i>spyoM12_ChORF_299_5</i>              | <i>SpyoM12_ChORF_299_5</i>              |               |                |                |                |
|                         | 6                                       | 6                                       | 1517          | 1491           | 1594           | 1577           |
| SpM1_ChORF0526_s_at     | <i>spy0526</i>                          | <i>spy0526</i>                          | 1441          | 1492           | 1440           | 1348           |
| SpM1_ChORF1081_at       | <i>srtR</i>                             | <i>spy1081</i>                          | 1594          | 1493           | 1637           | 1751           |
| SpM12_ChORF299-54_s_at  | <i>spyoM12_ChORF_299_5</i>              | <i>SpyoM12_ChORF_299_5</i>              |               |                |                |                |
|                         | 4                                       | 4                                       | 1496          | 1494           | 1596           | 1584           |
| SpyM3_1427_at           | <i>spyM3_1427</i>                       | <i>SpyM3_1427</i>                       | 1534          | 1495           | 1601           | 1587           |
| SpM1_ChORF1325_s_at     | <i>spy1325</i>                          | <i>spy1325</i>                          | 1381          | 1496           | 1278           | 1102           |
| SpM1_ChORF0146_s_at     | <i>spy0146</i>                          | <i>spy0146</i>                          | 1295          | 1497           | 1181           | 1086           |
| SpM1_ChORF0155_s_at     | <i>ntpB</i>                             | <i>spy0155</i>                          | 1498          | 1498           | 1424           | 1223           |
| SpM1_ChORF1361_s_at     | <i>inIA</i>                             | <i>spy1361</i>                          | 1473          | 1499           | 1545           | 1495           |
| SpM12_ChORF299-63_at    | <i>spyoM12_ChORF_299_6</i>              | <i>SpyoM12_ChORF_299_6</i>              |               |                |                |                |
|                         | 3                                       | 3                                       | 1632          | 1500           | 1584           | 1535           |
| SpM1_ChORF1985_s_at     | <i>spy1985</i>                          | <i>spy1985</i>                          | 1349          | 1501           | 869            | 615            |
| SpM1_ChORF1258_s_at     | <i>spy1258</i>                          | <i>spy1258</i>                          | 1675          | 1502           | 1655           | 1688           |
| SpM1_ChORF1704_s_at     | <i>lacD.1</i>                           | <i>spy1704</i>                          | 1100          | 1503           | 1328           | 989            |
| SpM1_ChORF1191_s_at     | <i>oadA</i>                             | <i>spy1191</i>                          | 1263          | 1504           | 1095           | 1073           |
| SpM1_ChORF2091_s_at     | <i>spy2091</i>                          | <i>spy2091</i>                          | 1412          | 1505           | 1156           | 1184           |
| SpM1_ChORF0639_s_at     | <i>kgdA</i>                             | <i>spy0639</i>                          | 1528          | 1506           | 1520           | 1490           |
| SpM12_ChORF299-46_at    | <i>spyoM12_ChORF_299_4</i>              | <i>SpyoM12_ChORF_299_4</i>              |               |                |                |                |
|                         | 6                                       | 6                                       | 1420          | 1507           | 1525           | 1423           |
| SpM18_ChORF1977_at      | <i>spyM18_1977</i>                      | <i>spyM18_1977</i>                      | 1559          | 1508           | 1554           | 1507           |
| SpM1_ChORF0154_s_at     | <i>ntpA</i>                             | <i>spy0154</i>                          | 1544          | 1509           | 1465           | 1349           |
| SpM1_ChORF2099_s_at     | <i>spy2099</i>                          | <i>spy2099</i>                          | 1603          | 1510           | 1652           | 1698           |
| SpM1_ChORF0571_s_at     | <i>licT</i>                             | <i>spy0571</i>                          | 1570          | 1511           | 1447           | 1557           |
| SpM12_ChORF218-7_s_at   | <i>spyoM12_ChORF_218_7</i>              | <i>SpyoM12_ChORF_218_7</i>              | 1439          | 1512           | 1454           | 1416           |
| SpM1_ChORF2170_at       | <i>spy2170</i>                          | <i>spy2170</i>                          | 1502          | 1513           | 1585           | 1637           |

| Probe Set Name *        | Gene Name                    | Synonym                      | Rank<br>0 min | Rank<br>30 min | Rank<br>60 min | Rank<br>90 min |
|-------------------------|------------------------------|------------------------------|---------------|----------------|----------------|----------------|
|                         | <i>spyoM12_ChrORF_299_4</i>  | <i>SpyoM12_ChrORF_299_4</i>  |               |                |                |                |
| SpM12_ChORF299-42_at    | 2                            | 2                            | 1401          | 1514           | 1524           | 1386           |
| SpM1_ChORF1296_s_at     | <i>malG</i>                  | <i>spy1296</i>               | 1611          | 1515           | 555            | 672            |
| SpM18_ChORF2199_s_at    | <i>spyM18_2199</i>           | <i>spyM18_2199</i>           | 1578          | 1516           | 1561           | 1594           |
| SpM1_ChORF2177_s_at     | <i>spy2177</i>               | <i>spy2177</i>               | 1629          | 1517           | 1576           | 1590           |
| SpM18_ChORF1331_s_at    | <i>spyM18_1331</i>           | <i>spyM18_1331</i>           | 1492          | 1518           | 1409           | 1182           |
| SpM1_ChORF0524_s_at     | <i>spy0524</i>               | <i>spy0524</i>               | 1571          | 1519           | 1552           | 1561           |
| SpM1_ChORF1769_s_at     | <i>spy1769</i>               | <i>spy1769</i>               | 1485          | 1520           | 1563           | 1510           |
| SpyM3_1764_at           | <i>spyM3_1764</i>            | <i>SpyM3_1764</i>            | 1479          | 1521           | 1581           | 1474           |
| SpM3_ChORF1124_s_at     | <i>spyM3_1124</i>            | <i>SpyM3_1124</i>            | 1465          | 1522           | 1642           | 1635           |
| SpM1_ChORF1816_s_at     | <i>scrB</i>                  | <i>spy1816</i>               | 1414          | 1523           | 1588           | 1625           |
| SpM1_ChORF1322_s_at     | <i>spy1322</i>               | <i>spy1322</i>               | 1469          | 1524           | 1396           | 1175           |
| SpM1_ChORF0546_s_at     | <i>spy0546</i>               | <i>spy0546</i>               | 1693          | 1525           | 1579           | 1530           |
| SpM1_ChORF1834_s_at     | <i>spy1834</i>               | <i>spy1834</i>               | 1564          | 1526           | 1586           | 1575           |
| SpM1_ChORF2039_s_at     | <i>speB</i>                  | <i>spy2039</i>               | 1411          | 1527           | 1527           | 1433           |
| SpM1_ChORF0543_s_at     | <i>mefE</i>                  | <i>spy0543</i>               | 1619          | 1528           | 1528           | 1528           |
| SpM1_ChORF2163_s_at     | <i>cadC</i>                  | <i>spy2163</i>               | 1591          | 1529           | 1571           | 1591           |
| SpM1_ChORF1059_s_at     | <i>ptsC</i>                  | <i>spy1059</i>               | 248           | 1530           | 922            | 407            |
| SpM1_ChORF1186_s_at     | <i>citD</i>                  | <i>spy1186</i>               | 1392          | 1531           | 1322           | 1411           |
| SpM1_ChORF0107_s_at     | <i>spy0107</i>               | <i>spy0107</i>               | 1724          | 1532           | 1582           | 1658           |
| SpM1_ChORF2051_s_at     | <i>spy2051</i>               | <i>spy2051</i>               | 1452          | 1533           | 1326           | 1286           |
| SpM1_ChORF1711_s_at     | <i>gatA</i>                  | <i>spy1711</i>               | 749           | 1534           | 1186           | 879            |
|                         | <i>spyoM5_ChrORF_275f02.</i> | <i>SpyoM5_ChrORF_275f02.</i> |               |                |                |                |
| SpM5_ChORF275f-139_s_at | <i>p1cq_139</i>              | <i>p1cq_139</i>              | 1630          | 1535           | 1640           | 1631           |
| SpM1_ChORF2085_s_at     | <i>fhs.2</i>                 | <i>spy2085</i>               | 1429          | 1536           | 1297           | 698            |
|                         | <i>spyoM49_ChrORF_sp001</i>  | <i>SpyoM49_ChrORF_sp001</i>  |               |                |                |                |
| SpM49_ChORF6658-6_s_at  | <i>_0_6658_6</i>             | <i>_0_6658_6</i>             | 1566          | 1537           | 1618           | 1623           |
| SpM1_ChORF0212_s_at     | <i>speG</i>                  | <i>spy0212</i>               | 1698          | 1538           | 1711           | 1737           |
| SpM1_ChORF0732_at       | <i>spy0732</i>               | <i>spy0732</i>               | 1661          | 1539           | 1578           | 1589           |
| SpM1_ChORF1110_s_at     | <i>spy1110</i>               | <i>spy1110</i>               | 1545          | 1540           | 1606           | 1618           |
| SpM3_ChORF0973_at       | <i>spyM3_0973</i>            | <i>SpyM3_0973</i>            | 1539          | 1541           | 1457           | 1337           |
| SpM1_ChORF0845_s_at     | <i>czcD</i>                  | <i>spy0845</i>               | 1588          | 1542           | 1506           | 1726           |
| SpM1_ChORF0847_s_at     | <i>spy0847</i>               | <i>spy0847</i>               | 1742          | 1543           | 1726           | 1838           |
| SpM1_ChORF1323_s_at     | <i>spy1323</i>               | <i>spy1323</i>               | 1500          | 1544           | 1444           | 1245           |
| SpM18_ChORF1800_at      | <i>spyM18_1800</i>           | <i>spyM18_1800</i>           | 1483          | 1545           | 1516           | 1415           |
| SpM1_ChORF1595_s_at     | <i>spy1595</i>               | <i>spy1595</i>               | 1435          | 1546           | 1203           | 818            |
| SpM1_ChORF0195_x_at     | <i>spy0195</i>               | <i>spy0195</i>               | 1592          | 1547           | 1529           | 1513           |
| SpM1_ChORF0257_s_at     | <i>nanH</i>                  | <i>spy0257</i>               | 1550          | 1548           | 1172           | 534            |
| SpM3_ChORF1004_s_at     | <i>spyM3_1004</i>            | <i>SpyM3_1004</i>            | 1499          | 1549           | 1436           | 1265           |
| SpM3_ChORF1017_s_at     | <i>spyM3_1017</i>            | <i>SpyM3_1017</i>            | 1522          | 1550           | 1521           | 1516           |
| SpM1_ChORF1367_s_at     | <i>spy1367</i>               | <i>spy1367</i>               | 1635          | 1551           | 1699           | 1743           |
|                         | <i>spyoM12_ChrORF_288_1</i>  | <i>SpyoM12_ChrORF_288_1</i>  |               |                |                |                |
| SpM12_ChORF288-15_at    | 5                            | 5                            | 1599          | 1552           | 1607           | 1588           |
| SpM1_ChORF1639_s_at     | <i>atoA</i>                  | <i>spy1639</i>               | 1513          | 1553           | 1620           | 1717           |
|                         | <i>spyoM49_ChrORF_sp001</i>  | <i>SpyoM49_ChrORF_sp001</i>  |               |                |                |                |
| SpM49_ChORF7585-5_at    | <i>_0_7585_5</i>             | <i>_0_7585_5</i>             | 1509          | 1554           | 1592           | 1555           |
|                         | <i>spyoM12_ChrORF_295_1</i>  | <i>SpyoM12_ChrORF_295_1</i>  |               |                |                |                |
| SpM12_ChORF295-17_s_at  | 7                            | 7                            | 1567          | 1555           | 1661           | 1676           |
|                         | <i>spyoM12_ChrORF_221_3</i>  | <i>SpyoM12_ChrORF_221_3</i>  |               |                |                |                |
| SpM12_ChORF221-3_s_at   | <i>spy0537</i>               | <i>spy0537</i>               | 1480          | 1556           | 1572           | 1481           |
| SpM12_ChORF277-20_s_at  | <i>spy0537</i>               | <i>spy0537</i>               | 1684          | 1557           | 1615           | 1653           |
| SpM1_ChORF1593_s_at     | <i>spy1593</i>               | <i>spy1593</i>               | 1491          | 1558           | 1383           | 1054           |
|                         | <i>spyoM12_ChrORF_260_3</i>  | <i>SpyoM12_ChrORF_260_3</i>  |               |                |                |                |
| SpM12_ChORF260-3_s_at   | <i>glpF</i>                  | <i>spy1682</i>               | 1644          | 1559           | 1643           | 1634           |
| SpM1_ChORF1682_s_at     | <i>comYA</i>                 | <i>spy0101</i>               | 1515          | 1560           | 1435           | 983            |
| SpM1_ChORF0101_s_at     | <i>comYA</i>                 | <i>spy0101</i>               | 1748          | 1561           | 1610           | 1678           |
| SpM1_ChORF2081_s_at     | <i>hutI</i>                  | <i>spy2081</i>               | 1432          | 1562           | 1286           | 854            |
| SpM18_ChORF1158_s_at    | <i>spyM18_1158</i>           | <i>spyM18_1158</i>           | 1450          | 1563           | 1580           | 1536           |
| SpM1_ChORF0846_s_at     | <i>spy0846</i>               | <i>spy0846</i>               | 1701          | 1564           | 1705           | 1790           |
| SpM1_ChORF0102_s_at     | <i>comYB</i>                 | <i>spy0102</i>               | 1735          | 1565           | 1626           | 1651           |
| SpM18_ChORF1397_at      | <i>spyM18_1397</i>           | <i>spyM18_1397</i>           | 1422          | 1566           | 1433           | 1320           |
| SpM1_ChORF0540_s_at     | <i>spy0540</i>               | <i>spy0540</i>               | 1683          | 1567           | 1623           | 1639           |

| Probe Set Name *       | Gene Name                  | Synonym                    | Rank<br>0 min | Rank<br>30 min | Rank<br>60 min | Rank<br>90 min |
|------------------------|----------------------------|----------------------------|---------------|----------------|----------------|----------------|
| SpM1_ChORF1708_s_at    | <i>spy1709</i>             | <i>spy1709</i>             | 1227          | 1568           | 1448           | 1229           |
|                        | <i>spyoM12_ChORF_301_3</i> | <i>SpyoM12_ChORF_301_3</i> |               |                |                |                |
| SpM12_ChORF301-33_at   | 3                          | 3                          | 1604          | 1569           | 1560           | 1553           |
| SpM1_ChORF0157_s_at    | <i>ntpD</i>                | <i>spy0157</i>             | 1601          | 1570           | 1549           | 1400           |
|                        | <i>spyoM12_ChORF_291_5</i> | <i>SpyoM12_ChORF_291_5</i> |               |                |                |                |
| SpM12_ChORF291-52_s_at | 2                          | 2                          | 1676          | 1571           | 1667           | 1755           |
| SpM1_ChORF0151_s_at    | <i>ntpC</i>                | <i>spy0151</i>             | 1593          | 1572           | 1482           | 1339           |
|                        | <i>spyoM12_ChORF_299_4</i> | <i>SpyoM12_ChORF_299_4</i> |               |                |                |                |
| SpM12_ChORF299-40_at   | 0                          | 0                          | 1519          | 1573           | 1611           | 1506           |
|                        | <i>spyoM12_ChORF_299_4</i> | <i>SpyoM12_ChORF_299_4</i> |               |                |                |                |
| SpM12_ChORF299-45_s_at | 5                          | 5                          | 1477          | 1574           | 1603           | 1527           |
|                        | <i>spyoM5_ChORF_270b10</i> | <i>SpyoM5_ChORF_270b10</i> |               |                |                |                |
| SpM5_ChORF270b-6_at    | <i>p1t_6</i>               | <i>.p1t_6</i>              | 1476          | 1575           | 1492           | 1368           |
| SpM1_ChORF1384_s_at    | <i>spy1384</i>             | <i>spy1384</i>             | 1549          | 1576           | 1463           | 1391           |
|                        | <i>spyoM12_ChORF_299_4</i> | <i>SpyoM12_ChORF_299_4</i> |               |                |                |                |
| SpM12_ChORF299-49_s_at | 9                          | 9                          | 1668          | 1577           | 1653           | 1612           |
| SpM1_ChORF0254_s_at    | <i>spy0254</i>             | <i>spy0254</i>             | 1574          | 1578           | 950            | 610            |
| SpM1_ChORF1591_s_at    | <i>spy1591</i>             | <i>spy1591</i>             | 1523          | 1579           | 1397           | 877            |
| SpM12_ChORF299-6_s_at  | <i>spyoM12_ChORF_299_6</i> | <i>SpyoM12_ChORF_299_6</i> | 1530          | 1580           | 1598           | 1489           |
| M12_1091_at            | M12_1091                   | M12_1091                   | 1643          | 1581           | 1674           | 1765           |
| SpM3_ChORF1054_s_at    | <i>spyM3_1054</i>          | <i>SpyM3_1054</i>          | 1548          | 1582           | 1537           | 1517           |
| SpM1_ChORF1952_s_at    | <i>spy1952</i>             | <i>spy1952</i>             | 1463          | 1583           | 1522           | 1450           |
| SpM1_ChORF1707_s_at    | <i>lacA.1</i>              | <i>spy1708</i>             | 1309          | 1584           | 1510           | 1308           |
| SpM18_ChORF0120_s_at   | <i>spyM18_0120</i>         | <i>spyM18_0120</i>         | 1703          | 1585           | 1599           | 1753           |
| SpM1_ChORF1912_s_at    | <i>salX</i>                | <i>spy1912</i>             | 1487          | 1586           | 1608           | 1524           |
| SpM1_ChORF1409_s_at    | <i>comEA</i>               | <i>spy1409</i>             | 1562          | 1587           | 1614           | 1624           |
| SpM1_ChORF0145_s_at    | <i>spy0145</i>             | <i>spy0145</i>             | 1478          | 1588           | 1509           | 1470           |
| SpM1_ChORF1326_s_at    | <i>spy1326</i>             | <i>spy1326</i>             | 1542          | 1589           | 1462           | 1363           |
| SpM1_ChORF1328_s_at    | <i>bglA.2</i>              | <i>spy1328</i>             | 1507          | 1590           | 1452           | 1374           |
| SpM1_ChORF0521_s_at    | <i>spy0521</i>             | <i>spy0521</i>             | 1608          | 1591           | 1507           | 1460           |
| M12_1770_at            | M12_1770                   | M12_1770                   | 1552          | 1592           | 1573           | 1445           |
|                        | <i>spyoM12_ChORF_299_4</i> | <i>SpyoM12_ChORF_299_4</i> |               |                |                |                |
| SpM12_ChORF299-41_at   | 1                          | 1                          | 1460          | 1593           | 1544           | 1367           |
| SpM1_ChORF0518_s_at    | <i>spy0518</i>             | <i>spy0518</i>             | 1581          | 1594           | 1483           | 1475           |
|                        | <i>spyoM12_ChORF_280_2</i> | <i>SpyoM12_ChORF_280_2</i> |               |                |                |                |
| SpM12_ChORF280-25_s_at | 5                          | 5                          | 1620          | 1595           | 1593           | 1542           |
| SpM1_ChORF1057_s_at    | <i>spy1057</i>             | <i>spy1057</i>             | 787           | 1596           | 1306           | 842            |
| SpM1_ChORF1109_s_at    | <i>malP</i>                | <i>spy1109</i>             | 1572          | 1597           | 1647           | 1669           |
| SpM1_ChORF1707_at      | <i>lacB.1</i>              | <i>spy1707</i>             | 1276          | 1598           | 1491           | 1295           |
| SpM12_ChORF299-7_at    | <i>spyoM12_ChORF_299_7</i> | <i>SpyoM12_ChORF_299_7</i> | 1579          | 1599           | 1616           | 1540           |
| SpM1_ChORF0104_s_at    | <i>spy0104</i>             | <i>spy0104</i>             | 1796          | 1600           | 1651           | 1816           |
| SpM1_ChORF1085_at      | <i>srtF</i>                | <i>spy1085</i>             | 1490          | 1601           | 1628           | 1652           |
|                        | <i>spyoM12_ChORF_301_7</i> | <i>SpyoM12_ChORF_301_7</i> |               |                |                |                |
| SpM12_ChORF301-71_s_at | 1                          | 1                          | 1617          | 1602           | 1627           | 1499           |
| SpM1_ChORF1589_s_at    | <i>spy1589</i>             | <i>spy1589</i>             | 1671          | 1603           | 1590           | 1571           |
| SpM1_ChORF1339_s_at    | <i>spy1339</i>             | <i>spy1339</i>             | 406           | 1604           | 797            | 821            |
|                        | <i>spyoM12_ChORF_282_2</i> | <i>SpyoM12_ChORF_282_2</i> |               |                |                |                |
| SpM12_ChORF282-20_s_at | 0                          | 0                          | 1723          | 1605           | 1741           | 1784           |
| SpM12_ChORF299-5_s_at  | <i>spyoM12_ChORF_299_5</i> | <i>SpyoM12_ChORF_299_5</i> | 1587          | 1606           | 1629           | 1559           |
|                        | <i>spyoM5_ChORF_270b10</i> | <i>SpyoM5_ChORF_270b10</i> |               |                |                |                |
| SpM5_ChORF270b-559_at  | <i>p1t_559</i>             | <i>.p1t_559</i>            | 1589          | 1607           | 1621           | 1598           |
| SpM18_ChORF1476_s_at   | <i>spyM18_1476</i>         | <i>spyM18_1476</i>         | 1651          | 1608           | 1694           | 1748           |
| SpM1_ChORF1949_s_at    | <i>spy1949</i>             | <i>spy1949</i>             | 1518          | 1609           | 1515           | 1408           |
| SpM1_ChORF1408_s_at    | <i>comEC</i>               | <i>spy1408</i>             | 1597          | 1610           | 1609           | 1630           |
| SpM1_ChORF0176_s_at    | <i>spy0176</i>             | <i>spy0176</i>             | 1536          | 1611           | 186            | 113            |
| SpM1_ChORF0549_s_at    | <i>spy0549</i>             | <i>spy0549</i>             | 1782          | 1612           | 1672           | 1640           |
| SpM18_ChORF1136_s_at   | <i>spyM18_1136</i>         | <i>spyM18_1136</i>         | 1467          | 1613           | 1600           | 1674           |
| SpM18_ChORF0740_x_at   | <i>spyM18_0740</i>         | <i>spyM18_0740</i>         | 1503          | 1614           | 1635           | 1567           |
| SpM18_ChORF1794_s_at   | <i>spyM18_1794</i>         | <i>spyM18_1794</i>         | 1527          | 1615           | 1551           | 1412           |

| Probe Set Name *          | Gene Name                  | Synonym                    | Rank<br>0 min | Rank<br>30 min | Rank<br>60 min | Rank<br>90 min |
|---------------------------|----------------------------|----------------------------|---------------|----------------|----------------|----------------|
| SpM1_ChORF0544_s_at       | <i>spy0544</i>             | <i>spy0544</i>             | 1793          | 1616           | 1670           | 1643           |
| SpM1_ChORF1086_s_at       | <i>srtE</i>                | <i>spy1086</i>             | 1576          | 1617           | 1634           | 1659           |
|                           | <i>spyoM5_ChORF_270b10</i> | <i>SpyoM5_ChORF_270b10</i> |               |                |                |                |
| SpM5_ChORF270b-557_at     | <i>p1t_557</i>             | <i>.p1t_557</i>            | 1586          | 1618           | 1625           | 1613           |
|                           | <i>spyoM12_ChORF_299_5</i> | <i>SpyoM12_ChORF_299_5</i> |               |                |                |                |
| SpM12_ChORF299-51_s_at    | <i>1</i>                   | <i>1</i>                   | 1697          | 1619           | 1702           | 1794           |
| SpM12_ChORF217-7_s_at     | <i>spyoM12_ChORF_217_7</i> | <i>SpyoM12_ChORF_217_7</i> | 1650          | 1620           | 1689           | 1722           |
| SpM1_ChORF0536_s_at       | <i>spy0536</i>             | <i>spy0536</i>             | 1682          | 1621           | 1639           | 1668           |
|                           | <i>spyoM5_ChORF_270b10</i> | <i>SpyoM5_ChORF_270b10</i> |               |                |                |                |
| SpM5_ChORF270b-333_s_at   | <i>p1t_333</i>             | <i>.p1t_333</i>            | 1627          | 1622           | 1656           | 1505           |
| SpM12_ChORF281-7_s_at     | <i>spyoM12_ChORF_281_7</i> | <i>SpyoM12_ChORF_281_7</i> | 1615          | 1623           | 1645           | 1503           |
| SpM1_ChORF0174_s_at       | <i>spy0174</i>             | <i>spy0174</i>             | 1454          | 1624           | 201            | 191            |
| SpM1_ChORF1083_at         | <i>srtA</i>                | <i>spy1083</i>             | 1699          | 1625           | 1707           | 1776           |
| SpM1_ChORF1557_s_at       | <i>msrA</i>                | <i>spy1557</i>             | 1772          | 1626           | 1583           | 1586           |
| SpM12_ChORF218-1_s_at     | <i>spyoM12_ChORF_218_1</i> | <i>SpyoM12_ChORF_218_1</i> | 1687          | 1627           | 1687           | 1714           |
| SpM1_ChORF0315_s_at       | <i>spy0315</i>             | <i>spy0315</i>             | 1616          | 1628           | 1701           | 1664           |
| M12_1466_s_at             | <i>M12_1466</i>            | <i>M12_1466</i>            | 1575          | 1629           | 1664           | 1573           |
| SpM1_ChORF0110_s_at       | <i>spy0110</i>             | <i>spy0110</i>             | 1670          | 1630           | 1658           | 1702           |
| SpM12_ChORF236-4_s_at     | <i>spyoM12_ChORF_236_4</i> | <i>SpyoM12_ChORF_236_4</i> | 1610          | 1631           | 1680           | 1611           |
|                           | <i>spyoM49_ChORF_sp001</i> | <i>SpyoM49_ChORF_sp001</i> |               |                |                |                |
| SpM49_ChORF7585-30_at     | <i>_0_7585_30</i>          | <i>_0_7585_30</i>          | 1609          | 1632           | 1630           | 1519           |
| SpM1_ChORF0519_s_at       | <i>spy0519</i>             | <i>spy0519</i>             | 1637          | 1633           | 1530           | 1518           |
| SpM1_ChORF1169_s_at       | <i>spy1169</i>             | <i>spy1169</i>             | 1600          | 1634           | 1678           | 1626           |
| SpM1_ChORF1324_s_at       | <i>spy1324</i>             | <i>spy1324</i>             | 1598          | 1635           | 1534           | 1410           |
| SpM18_ChORF1133_s_at      | <i>spyM18_1133</i>         | <i>spyM18_1133</i>         | 1606          | 1636           | 1619           | 1706           |
| SpM1_ChORF0141_s_at       | <i>atoD.2</i>              | <i>spy0141</i>             | 1677          | 1637           | 1517           | 1471           |
| M12_1767_at               | <i>M12_1767</i>            | <i>M12_1767</i>            | 1568          | 1638           | 1633           | 1508           |
| SpM18_ChORF0202_s_at      | <i>spyM18_0202</i>         | <i>spyM18_0202</i>         | 1700          | 1639           | 1712           | 1633           |
| SpM1_ChORF2089_s_at       | <i>hutH</i>                | <i>spy2089</i>             | 1638          | 1640           | 1547           | 1131           |
| SpM18_ChORF0148_s_at      | <i>msmRL</i>               | <i>spyM18_0148</i>         | 1649          | 1641           | 1542           | 1396           |
| SpM1_ChORF1181_s_at       | <i>spy1181</i>             | <i>spy1181</i>             | 1626          | 1642           | 1632           | 1777           |
| SpM18_ChORF1444_x_at      | <i>spyM18_1444</i>         | <i>spyM18_1444</i>         | 1820          | 1643           | 1671           | 1795           |
| SpM1_ChORF1914_s_at       | <i>salB</i>                | <i>spy1914</i>             | 1558          | 1644           | 1697           | 1680           |
| SpM1_ChORF1208_s_at       | <i>spy1208</i>             | <i>spy1208</i>             | 1741          | 1645           | 1710           | 1724           |
| SpM1_ChORF0179_s_at       | <i>araD</i>                | <i>spy0179</i>             | 1546          | 1646           | 248            | 80             |
| SpM18_ChORF1787_at        | <i>spyM18_1787</i>         | <i>spyM18_1787</i>         | 1645          | 1647           | 1644           | 1529           |
| SpM18_ChORF1796_s_at      | <i>spyM18_1796</i>         | <i>spyM18_1796</i>         | 1573          | 1648           | 1587           | 1385           |
| SpM1_ChORF0634_s_at       | <i>agaF</i>                | <i>spy0634</i>             | 1472          | 1649           | 1437           | 1281           |
| SpM1_ChORF0199_s_at       | <i>spy0199</i>             | <i>spy0199</i>             | 1709          | 1650           | 1685           | 1696           |
|                           | <i>spyoM5_ChORF_J7578C</i> | <i>SpyoM5_ChORF_J7578C</i> |               |                |                |                |
| SpM5_ChORFJ7578C-323_s_at | <i>e05.s1c_323</i>         | <i>e05.s1c_323</i>         | 1708          | 1651           | 1669           | 1632           |
| SpM1_ChORF0177_s_at       | <i>spy0177</i>             | <i>spy0177</i>             | 1565          | 1652           | 234            | 118            |
| M12_0889_at               | <i>M12_0889</i>            | <i>M12_0889</i>            | 1664          | 1653           | 1662           | 1579           |
| SpM1_ChORF0631_s_at       | <i>agaV</i>                | <i>spy0631</i>             | 1535          | 1654           | 1484           | 1379           |
| SpM1_ChORF0178_s_at       | <i>spy0178</i>             | <i>spy0178</i>             | 1488          | 1655           | 184            | 82             |
| SpM12_ChORF299-4_at       | <i>spyoM12_ChORF_299_4</i> | <i>SpyoM12_ChORF_299_4</i> | 1622          | 1656           | 1659           | 1629           |
| SpM18_ChORF2254_s_at      | <i>spyM18_2254</i>         | <i>spyM18_2254</i>         | 1662          | 1657           | 1713           | 1734           |
| SpyM3_1447_at             | <i>spyM3_1447</i>          | <i>SpyM3_1447</i>          | 1580          | 1658           | 1641           | 1526           |
| SpM1_ChORF0555_s_at       | <i>spy0555</i>             | <i>spy0555</i>             | 1660          | 1659           | 1675           | 1592           |
| SpM1_ChORF1453_s_at       | <i>spy1453</i>             | <i>spy1453</i>             | 1713          | 1660           | 1657           | 1601           |
| M12_1772_x_at             | <i>M12_1772</i>            | <i>M12_1772</i>            | 1602          | 1661           | 1654           | 1556           |
| SpM18_ChORF0736_s_at      | <i>spyM18_0736</i>         | <i>spyM18_0736</i>         | 1614          | 1662           | 1646           | 1537           |
| SpM12_ChORF299-9_at       | <i>spyoM12_ChORF_299_9</i> | <i>SpyoM12_ChORF_299_9</i> | 1624          | 1663           | 1684           | 1691           |
| SpM1_ChORF0629_s_at       | <i>agaD</i>                | <i>spy0629</i>             | 1641          | 1664           | 1497           | 1369           |
|                           | <i>spyoM5_ChORF_4P31a0</i> | <i>SpyoM5_ChORF_4P31a0</i> |               |                |                |                |
| SpM5_ChORF4P31a-8_s_at    | <i>1.w2c2309_8</i>         | <i>1.w2c2309_8</i>         | 1663          | 1665           | 1718           | 1671           |

| Probe Set Name *          | Gene Name                   | Synonym                     | Rank<br>0 min | Rank<br>30 min | Rank<br>60 min | Rank<br>90 min |
|---------------------------|-----------------------------|-----------------------------|---------------|----------------|----------------|----------------|
|                           | <i>spyoM5_ChrORF_J7578C</i> | <i>SpyoM5_ChrORF_J7578C</i> |               |                |                |                |
| SpM5_ChORFJ7578C-260_s_at | <i>e05.s1c_260</i>          | <i>e05.s1c_260</i>          | 1516          | 1666           | 1490           | 1461           |
| SpM1_ChORF0103_s_at       | <i>comYC</i>                | <i>spy0103</i>              | 1858          | 1667           | 1738           | 1858           |
| SpM1_ChORF0258_s_at       | <i>spy0258</i>              | <i>spy0258</i>              | 1636          | 1668           | 1334           | 592            |
| M12_1769_at               | <i>M12_1769</i>             | <i>M12_1769</i>             | 1583          | 1669           | 1665           | 1539           |
| SpM1_ChORF1596_s_at       | <i>spy1596</i>              | <i>spy1596</i>              | 1696          | 1670           | 1663           | 1661           |
|                           | <i>spyoM12_ChrORF_299_4</i> | <i>SpyoM12_ChrORF_299_4</i> |               |                |                |                |
| SpM12_ChORF299-44_at      | <i>4</i>                    | <i>4</i>                    | 1582          | 1671           | 1682           | 1650           |
| SpM1_ChORF1075_at         | <i>spy1075</i>              | <i>spy1075</i>              | 1658          | 1672           | 1677           | 1549           |
| SpM18_ChORF1329_s_at      | <i>spyM18_1329</i>          | <i>spyM18_1329</i>          | 1639          | 1673           | 1577           | 1465           |
| SpM1_ChORF1558_s_at       | <i>spy1558</i>              | <i>spy1558</i>              | 1840          | 1674           | 1650           | 1647           |
|                           | <i>spyoM12_ChrORF_286_2</i> | <i>SpyoM12_ChrORF_286_2</i> |               |                |                |                |
| SpM12_ChORF286-28_s_at    | <i>8</i>                    | <i>8</i>                    | 1665          | 1675           | 1673           | 1725           |
| SpM1_ChORF0135_at         | <i>spy0135</i>              | <i>spy0135</i>              | 1667          | 1676           | 1679           | 1615           |
| SpM1_ChORF1473_s_at       | <i>spy1473</i>              | <i>spy1473</i>              | 1538          | 1677           | 1696           | 1699           |
| SpM1_ChORF2088_s_at       | <i>spy2088</i>              | <i>spy2088</i>              | 1640          | 1678           | 1548           | 1161           |
| SpM1_ChORF1615_s_at       | <i>comFC</i>                | <i>spy1615</i>              | 1666          | 1679           | 1692           | 1712           |
| SpM1_ChORF0150_s_at       | <i>ntpE</i>                 | <i>spy0150</i>              | 1634          | 1680           | 1538           | 1462           |
|                           | <i>spyoM49_ChrORF_sp001</i> | <i>SpyoM49_ChrORF_sp001</i> |               |                |                |                |
| SpM49_ChORF7585-32_at     | <i>_0_7585_32</i>           | <i>_0_7585_32</i>           | 1730          | 1681           | 1668           | 1560           |
|                           | <i>spyoM12_ChrORF_299_2</i> | <i>SpyoM12_ChrORF_299_2</i> |               |                |                |                |
| SpM12_ChORF299-2_x_at     | <i>spy2040</i>              | <i>spy2040</i>              | 1613          | 1682           | 1691           | 1703           |
| SpM1_ChORF2040_at         | <i>spy2040</i>              | <i>spy2040</i>              | 1595          | 1683           | 1700           | 1690           |
| SpM1_ChORF1947_s_at       | <i>spy1947</i>              | <i>spy1947</i>              | 1633          | 1684           | 1595           | 1501           |
| SpM1_ChORF2087_s_at       | <i>spy2087</i>              | <i>spy2087</i>              | 1621          | 1685           | 1532           | 1018           |
| SpM12_ChORF291-40_s_at    | <i>spyM18_2064</i>          | <i>spyM18_2064</i>          | 1745          | 1686           | 1745           | 1801           |
|                           | <i>spyoM49_ChrORF_sp001</i> | <i>SpyoM49_ChrORF_sp001</i> |               |                |                |                |
| SpM49_ChORF7585-31_at     | <i>_0_7585_31</i>           | <i>_0_7585_31</i>           | 1757          | 1687           | 1690           | 1604           |
| SpM1_ChORF1610_s_at       | <i>spy1610</i>              | <i>spy1610</i>              | 1705          | 1688           | 1750           | 1837           |
| SpM1_ChORF1856_s_at       | <i>norA</i>                 | <i>spy1856</i>              | 270           | 1689           | 1803           | 1830           |
|                           | <i>spyoM12_ChrORF_299_4</i> | <i>SpyoM12_ChrORF_299_4</i> |               |                |                |                |
| SpM12_ChORF299-48_at      | <i>8</i>                    | <i>8</i>                    | 1809          | 1690           | 1748           | 1850           |
| SpM1_ChORF0148_s_at       | <i>ntpl</i>                 | <i>spy0148</i>              | 1543          | 1691           | 1478           | 1451           |
|                           | <i>spyoM12_ChrORF_299_1</i> | <i>SpyoM12_ChrORF_299_1</i> |               |                |                |                |
| SpM12_ChORF299-1_at       | <i>spy1999</i>              | <i>spy1999</i>              | 1625          | 1692           | 1686           | 1694           |
| SpM1_ChORF1999_at         | <i>spy1999</i>              | <i>spy1999</i>              | 1596          | 1693           | 1636           | 1645           |
| SpM1_ChORF2082_at         | <i>hutU</i>                 | <i>spy2082</i>              | 1437          | 1694           | 1263           | 886            |
| SpM1_ChORF0431_at         | <i>spy0431</i>              | <i>spy0431</i>              | 1704          | 1695           | 1811           | 1861           |
| SpM49_ChORF7585-11_s_at   | <i>spyM18_1495</i>          | <i>spyM18_1495</i>          | 1563          | 1696           | 1688           | 1673           |
| SpM1_ChORF1456_s_at       | <i>spy1456</i>              | <i>spy1456</i>              | 1747          | 1697           | 1720           | 1695           |
| SpM18_ChORF0394_x_at      | <i>spyM18_0394</i>          | <i>spyM18_0394</i>          | 1851          | 1698           | 1764           | 1780           |
| SpM1_ChORF1461_x_at       | <i>spy1461</i>              | <i>spy1461</i>              | 1673          | 1699           | 1714           | 1636           |
| SpM1_ChORF0140_s_at       | <i>spy0140</i>              | <i>spy0140</i>              | 1725          | 1700           | 1557           | 1580           |
| SpM12_ChORF295-23_s_at    | <i>spy0255</i>              | <i>spy0255</i>              | 1674          | 1701           | 1373           | 1041           |
|                           | <i>spyoM12_ChrORF_299_8</i> | <i>SpyoM12_ChrORF_299_8</i> |               |                |                |                |
| SpM12_ChORF299-8_s_at     | <i>spy0535</i>              | <i>spy0535</i>              | 1648          | 1702           | 1683           | 1685           |
| SpM1_ChORF0535_s_at       | <i>spy0535</i>              | <i>spy0535</i>              | 1802          | 1703           | 1724           | 1822           |
|                           | <i>spyoM49_ChrORF_sp001</i> | <i>SpyoM49_ChrORF_sp001</i> |               |                |                |                |
| SpM49_ChORF7585-6_at      | <i>_0_7585_6</i>            | <i>_0_7585_6</i>            | 1657          | 1704           | 1704           | 1711           |
| SpM1_ChORF0300_s_at       | <i>comX1.1</i>              | <i>spy0300</i>              | 1786          | 1705           | 1783           | 1787           |
|                           | <i>spyoM49_ChrORF_sp001</i> | <i>SpyoM49_ChrORF_sp001</i> |               |                |                |                |
| SpM49_ChORF7585-19_at     | <i>_0_7585_19</i>           | <i>_0_7585_19</i>           | 1659          | 1706           | 1660           | 1619           |
| SpM18_ChORF1209_x_at      | <i>spyM18_1209</i>          | <i>spyM18_1209</i>          | 1691          | 1707           | 1755           | 1789           |
| SpM1_ChORF0198_s_at       | <i>spy0198</i>              | <i>spy0198</i>              | 1785          | 1708           | 1733           | 1739           |
|                           | <i>spyoM12_ChrORF_226_4</i> | <i>SpyoM12_ChrORF_226_4</i> |               |                |                |                |
| SpM12_ChORF226-4_at       | <i>spyM18_1786</i>          | <i>spyM18_1786</i>          | 1669          | 1709           | 1785           | 1883           |
| SpM18_ChORF1786_at        | <i>spyM18_1786</i>          | <i>spyM18_1786</i>          | 1740          | 1710           | 1708           | 1614           |
| SpM18_ChORF1798_at        | <i>spyM18_1798</i>          | <i>spyM18_1798</i>          | 1646          | 1711           | 1666           | 1582           |
|                           | <i>spyoM12_ChrORF_251_8</i> | <i>SpyoM12_ChrORF_251_8</i> |               |                |                |                |
| SpM12_ChORF251-8_at       | <i>spyM3_1432</i>           | <i>SpyM3_1432</i>           | 1717          | 1712           | 1709           | 1689           |
| SpyM3_1432_at             | <i>spyM3_1432</i>           | <i>SpyM3_1432</i>           | 1737          | 1713           | 1749           | 1810           |
| SpM1_ChORF1950_s_at       | <i>spy1950</i>              | <i>spy1950</i>              | 1607          | 1714           | 1613           | 1512           |

| Probe Set Name *        | Gene Name                                | Synonym                                  | Rank<br>0 min | Rank<br>30 min | Rank<br>60 min | Rank<br>90 min |
|-------------------------|------------------------------------------|------------------------------------------|---------------|----------------|----------------|----------------|
|                         | <i>spyoM12_ChrORF_300_5</i>              | <i>SpyoM12_ChrORF_300_5</i>              |               |                |                |                |
| SpM1_ChORF0135_s_at     | 1                                        | 1                                        | 1707          | 1715           | 1739           | 1729           |
| SpM18_ChORF0262_at      | <i>spyM18_0262</i>                       | <i>spyM18_0262</i>                       | 1838          | 1716           | 1882           | 1912           |
| SpM1_ChORF0256_s_at     | <i>spy0256</i>                           | <i>spy0256</i>                           | 1681          | 1717           | 1428           | 1042           |
|                         | <i>spyoM49_ChrORF_sp001_0_7585_3</i>     | <i>SpyoM49_ChrORF_sp001_0_7585_3</i>     |               |                |                |                |
| SpM49_ChORF7585-3_at    |                                          |                                          | 1680          | 1718           | 1730           | 1638           |
|                         | <i>spyoM12_ChrORF_299_4</i>              | <i>SpyoM12_ChrORF_299_4</i>              |               |                |                |                |
| SpM12_ChORF299-47_s_at  | 7                                        | 7                                        | 1689          | 1719           | 1693           | 1622           |
| SpM18_ChORF0635_s_at    | <i>spyM18_0635</i>                       | <i>spyM18_0635</i>                       | 1756          | 1720           | 1806           | 1820           |
| SpM1_ChORF0031_s_at     | <i>spy0031</i>                           | <i>spy0031</i>                           | 1766          | 1721           | 1751           | 1738           |
|                         | <i>spyoM12_ChrORF_296_2</i>              | <i>SpyoM12_ChrORF_296_2</i>              |               |                |                |                |
| SpM12_ChORF296-2_s_at   |                                          |                                          | 1732          | 1722           | 1799           | 1760           |
| SpM1_ChORF0105_s_at     | <i>spy0105</i>                           | <i>spy0105</i>                           | 1884          | 1723           | 1763           | 1845           |
|                         | <i>spyoM5_ChrORF_4P31a0_1.w2c2309_19</i> | <i>SpyoM5_ChrORF_4P31a0_1.w2c2309_19</i> |               |                |                |                |
| SpM5_ChORF4P31a-199_at  |                                          |                                          | 1754          | 1724           | 1736           | 1730           |
|                         | <i>spyoM12_ChrORF_285_3</i>              | <i>SpyoM12_ChrORF_285_3</i>              |               |                |                |                |
| SpM12_ChORF285-3_s_at   |                                          |                                          | 1743          | 1725           | 1727           | 1733           |
| SpM1_ChORF0149_s_at     | <i>ntpK</i>                              | <i>spy0149</i>                           | 1686          | 1726           | 1612           | 1544           |
| SpM18_ChORF1797_s_at    | <i>spyM18_1797</i>                       | <i>spyM18_1797</i>                       | 1654          | 1727           | 1681           | 1609           |
| SpM1_ChORF2083_s_at     | <i>spy2083</i>                           | <i>spy2083</i>                           | 1521          | 1728           | 1393           | 970            |
| SpM18_ChORF1715_at      | <i>nadE</i>                              | <i>spyM18_1715</i>                       | 1428          | 1729           | 1604           | 1496           |
|                         | <i>spyoM12_ChrORF_300_5</i>              | <i>SpyoM12_ChrORF_300_5</i>              |               |                |                |                |
| SpM12_ChORF300-50_s_at  | 0                                        | 0                                        | 1727          | 1730           | 1728           | 1746           |
| SpM1_ChORF0556_s_at     | <i>spy0556</i>                           | <i>spy0556</i>                           | 1731          | 1731           | 1721           | 1616           |
|                         | <i>spyoM12_ChrORF_256_1</i>              | <i>SpyoM12_ChrORF_256_1</i>              |               |                |                |                |
| SpM12_ChORF256-17_at    | 7                                        | 7                                        | 1758          | 1732           | 1795           | 1804           |
| M12_1752_at             | M12_1752                                 | M12_1752                                 | 1672          | 1733           | 1706           | 1683           |
|                         | <i>spyoM49_ChrORF_sp001_0_7585_22</i>    | <i>SpyoM49_ChrORF_sp001_0_7585_22</i>    |               |                |                |                |
| SpM49_ChORF7585-22_at   |                                          |                                          | 1790          | 1734           | 1737           | 1655           |
|                         | <i>spyoM12_ChrORF_299_5</i>              | <i>SpyoM12_ChrORF_299_5</i>              |               |                |                |                |
| SpM12_ChORF299-50_at    | 0                                        | 0                                        | 1803          | 1735           | 1760           | 1809           |
|                         | <i>spyoM12_ChrORF_217_5</i>              | <i>SpyoM12_ChrORF_217_5</i>              |               |                |                |                |
| SpM12_ChORF217-5_at     |                                          |                                          | 1706          | 1736           | 1725           | 1684           |
| SpM1_ChORF0630_s_at     | <i>agaW</i>                              | <i>spy0630</i>                           | 1647          | 1737           | 1570           | 1511           |
|                         | <i>spyoM5_ChrORF_270b10.p1t_7</i>        | <i>SpyoM5_ChrORF_270b10.p1t_7</i>        |               |                |                |                |
| SpM5_ChORF270b-7_at     |                                          |                                          | 1710          | 1738           | 1698           | 1617           |
| SpM1_ChORF1465_s_at     | <i>spy1465</i>                           | <i>spy1465</i>                           | 1728          | 1739           | 1731           | 1656           |
| SpM1_ChORF1084_at       | <i>srtT</i>                              | <i>spy1084</i>                           | 1679          | 1740           | 1747           | 1764           |
|                         | <i>spyoM12_ChrORF_299_1</i>              | <i>SpyoM12_ChrORF_299_1</i>              |               |                |                |                |
| SpM12_ChORF299-10_at    | 0                                        | 0                                        | 1692          | 1741           | 1769           | 1775           |
|                         | <i>spyoM5_ChrORF_125g01.q1ch_65</i>      | <i>SpyoM5_ChrORF_125g01.q1ch_65</i>      |               |                |                |                |
| SpM5_ChORF125g-65_x_at  |                                          |                                          | 1712          | 1742           | 1732           | 1709           |
|                         | <i>spyoM49_ChrORF_sp001_0_7585_21</i>    | <i>SpyoM49_ChrORF_sp001_0_7585_21</i>    |               |                |                |                |
| SpM49_ChORF7585-21_at   |                                          |                                          | 1800          | 1743           | 1729           | 1667           |
|                         | <i>spyoM5_ChrORF_270b10.p1t_135</i>      | <i>SpyoM5_ChrORF_270b10.p1t_135</i>      |               |                |                |                |
| SpM5_ChORF270b-135_s_at |                                          |                                          | 1739          | 1744           | 1716           | 1735           |
|                         | <i>spyoM49_ChrORF_sp001_0_7585_24</i>    | <i>SpyoM49_ChrORF_sp001_0_7585_24</i>    |               |                |                |                |
| SpM49_ChORF7585-24_at   |                                          |                                          | 1797          | 1745           | 1734           | 1682           |
| SpM1_ChORF0534_s_at     | <i>aroE.2</i>                            | <i>spy0534</i>                           | 1861          | 1746           | 1753           | 1824           |
| SpM1_ChORF1441_s_at     | <i>spy1441</i>                           | <i>spy1441</i>                           | 1733          | 1747           | 1756           | 1665           |
|                         | <i>spyoM5_ChrORF_169a5.p1t_196</i>       | <i>SpyoM5_ChrORF_169a5.p1t_196</i>       |               |                |                |                |
| SpM5_ChORF169a-196_at   |                                          |                                          | 1736          | 1748           | 1789           | 1792           |
| SpM1_ChORF1460_s_at     | <i>spy1460</i>                           | <i>spy1460</i>                           | 1746          | 1749           | 1735           | 1663           |
|                         | <i>spyoM12_ChrORF_249_1</i>              | <i>SpyoM12_ChrORF_249_1</i>              |               |                |                |                |
| SpM12_ChORF249-1_at     |                                          |                                          | 1760          | 1750           | 1759           | 1705           |
|                         | <i>spyoM12_ChrORF_293_4</i>              | <i>SpyoM12_ChrORF_293_4</i>              |               |                |                |                |
| SpM12_ChORF293-41_s_at  | 1                                        | 1                                        | 1761          | 1751           | 1817           | 1853           |
| SpM1_ChORF1468_s_at     | <i>spy1468</i>                           | <i>spy1468</i>                           | 1794          | 1752           | 1768           | 1749           |
|                         | <i>spyoM49_ChrORF_sp001_0_7585_37</i>    | <i>SpyoM49_ChrORF_sp001_0_7585_37</i>    |               |                |                |                |
| SpM49_ChORF7585-37_at   |                                          |                                          | 1773          | 1753           | 1715           | 1648           |
| SpM1_ChORF2050_at       | <i>spy2050</i>                           | <i>spy2050</i>                           | 1702          | 1754           | 1574           | 1563           |
| SpM1_ChORF0685_s_at     | <i>spy0685</i>                           | <i>spy0685</i>                           | 1721          | 1755           | 1762           | 1728           |

| Probe Set Name *       | Gene Name                            | Synonym                              | Rank<br>0 min | Rank<br>30 min | Rank<br>60 min | Rank<br>90 min |
|------------------------|--------------------------------------|--------------------------------------|---------------|----------------|----------------|----------------|
| SpM18_ChORF1303_at     | <i>spyM18_1303</i>                   | <i>spyM18_1303</i>                   | 1714          | 1756           | 1695           | 1642           |
| SpM49_ChORF7585-9_at   | <i>spyoM49_ChORF_sp001_0_7585_9</i>  | <i>SpyoM49_ChORF_sp001_0_7585_9</i>  | 1678          | 1757           | 1757           | 1750           |
| SpM12_ChORF298-25_s_at | <i>spyoM12_ChORF_298_2_5</i>         | <i>SpyoM12_ChORF_298_2_5</i>         | 1744          | 1758           | 1740           | 1677           |
| SpM12_ChORF299-49_at   | <i>spyoM12_ChORF_299_4_9</i>         | <i>SpyoM12_ChORF_299_4_9</i>         | 1862          | 1759           | 1801           | 1841           |
| SpM49_ChORF7585-26_at  | <i>spyoM49_ChORF_sp001_0_7585_26</i> | <i>SpyoM49_ChORF_sp001_0_7585_26</i> | 1795          | 1760           | 1723           | 1718           |
| SpM49_ChORF7585-17_at  | <i>spyoM49_ChORF_sp001_0_7585_17</i> | <i>SpyoM49_ChORF_sp001_0_7585_17</i> | 1764          | 1761           | 1722           | 1657           |
| SpM18_ChORF1923_at     | <i>spyM18_1923</i>                   | <i>spyM18_1923</i>                   | 1784          | 1762           | 1856           | 1895           |
| SpM12_ChORF280-10_s_at | <i>spyoM12_ChORF_280_1_0</i>         | <i>SpyoM12_ChORF_280_1_0</i>         | 1781          | 1763           | 1828           | 1788           |
| M12_1348_s_at          | <i>M12_1348</i>                      | <i>M12_1348</i>                      | 1810          | 1764           | 1767           | 1672           |
| SpM1_ChORF0706_s_at    | <i>spy0706</i>                       | <i>spy0706</i>                       | 1771          | 1765           | 1744           | 1662           |
| SpM1_ChORF1449_s_at    | <i>spy1449</i>                       | <i>spy1449</i>                       | 1836          | 1766           | 1808           | 1854           |
| SpM49_ChORF1257-2_at   | <i>spyoM49_ChORF_sp001_0_1257_2</i>  | <i>SpyoM49_ChORF_sp001_0_1257_2</i>  | 1763          | 1767           | 1798           | 1848           |
| SpM12_ChORF175-2_s_at  | <i>spyoM12_ChORF_175_2</i>           | <i>SpyoM12_ChORF_175_2</i>           | 1642          | 1768           | 1568           | 1554           |
| SpM18_ChORF2161_s_at   | <i>spy2103</i>                       | <i>spy2103</i>                       | 1842          | 1769           | 1802           | 1867           |
| SpM18_ChORF2020_at     | <i>salk</i>                          | <i>spyM18_2020</i>                   | 1688          | 1770           | 1835           | 1851           |
| SpM5_ChORF270b-343_at  | <i>spyoM5_ChORF_270b10.p1t_343</i>   | <i>SpyoM5_ChORF_270b10.p1t_343</i>   | 1715          | 1771           | 1754           | 1670           |
| SpM12_ChORF224-2_at    | <i>spyoM12_ChORF_224_2</i>           | <i>SpyoM12_ChORF_224_2</i>           | 1778          | 1772           | 1771           | 1701           |
| SpM1_ChORF1455_s_at    | <i>spy1455</i>                       | <i>spy1455</i>                       | 1808          | 1773           | 1746           | 1681           |
| SpM1_ChORF0676_s_at    | <i>spy0676</i>                       | <i>spy0676</i>                       | 1750          | 1774           | 1766           | 1679           |
| SpM12_ChORF220-1_s_at  | <i>spyoM12_ChORF_220_1</i>           | <i>SpyoM12_ChORF_220_1</i>           | 1813          | 1775           | 1800           | 1803           |
| SpM12_ChORF227-1_at    | <i>spyoM12_ChORF_227_1</i>           | <i>SpyoM12_ChORF_227_1</i>           | 1779          | 1776           | 1816           | 1770           |
| SpyM3_1756_s_at        | <i>spyM3_1756</i>                    | <i>SpyM3_1756</i>                    | 1801          | 1777           | 1523           | 1603           |
| SpM3_ChORF1118_s_at    | <i>spyM3_1118</i>                    | <i>SpyM3_1118</i>                    | 1690          | 1778           | 1782           | 1747           |
| SpyM3_1824_at          | <i>spyM3_1824</i>                    | <i>SpyM3_1824</i>                    | 1769          | 1779           | 1786           | 1855           |
| SpM49_ChORF7585-33_at  | <i>spyoM49_ChORF_sp001_0_7585_33</i> | <i>SpyoM49_ChORF_sp001_0_7585_33</i> | 1832          | 1780           | 1778           | 1771           |
| SpM49_ChORF7585-2_at   | <i>spyoM49_ChORF_sp001_0_7585_2</i>  | <i>SpyoM49_ChORF_sp001_0_7585_2</i>  | 1694          | 1781           | 1770           | 1763           |
| SpM1_ChORF0175_s_at    | <i>spy0175</i>                       | <i>spy0175</i>                       | 1623          | 1782           | 465            | 272            |
| SpM49_ChORF7585-4_at   | <i>spyoM49_ChORF_sp001_0_7585_4</i>  | <i>SpyoM49_ChORF_sp001_0_7585_4</i>  | 1720          | 1783           | 1815           | 1817           |
| SpyM3_1321_at          | <i>spyM3_1321</i>                    | <i>SpyM3_1321</i>                    | 1823          | 1784           | 1743           | 1727           |
| SpM3_ChORF0391_at      | <i>spyM3_0391</i>                    | <i>SpyM3_0391</i>                    | 1819          | 1785           | 1794           | 1745           |
| SpM49_ChORF7585-38_at  | <i>spyoM49_ChORF_sp001_0_7585_38</i> | <i>SpyoM49_ChORF_sp001_0_7585_38</i> | 1837          | 1786           | 1777           | 1762           |
| SpM1_ChORF0180_s_at    | <i>spy0180</i>                       | <i>spy0180</i>                       | 1765          | 1787           | 1558           | 1413           |
| SpM18_ChORF1301_at     | <i>spyM18_1301</i>                   | <i>spyM18_1301</i>                   | 1792          | 1788           | 1841           | 1833           |
| SpM12_ChORF290-9_s_at  | <i>spyoM12_ChORF_290_9</i>           | <i>SpyoM12_ChORF_290_9</i>           | 1755          | 1789           | 1787           | 1732           |
| SpM49_ChORF7585-39_at  | <i>spyoM49_ChORF_sp001_0_7585_39</i> | <i>SpyoM49_ChORF_sp001_0_7585_39</i> | 1805          | 1790           | 1790           | 1736           |
| SpM18_ChORF0677_x_at   | <i>spyM18_0677</i>                   | <i>spyM18_0677</i>                   | 1834          | 1791           | 1822           | 1819           |
| SpM12_ChORF299-38_at   | <i>spyoM12_ChORF_299_3_8</i>         | <i>SpyoM12_ChORF_299_3_8</i>         | 1719          | 1792           | 1772           | 1723           |
| SpM1_ChORF0947_s_at    | <i>spy0947</i>                       | <i>spy0947</i>                       | 1685          | 1793           | 1824           | 1823           |
| SpM5_ChORF270b-554_at  | <i>spyoM5_ChORF_270b10.p1t_554</i>   | <i>SpyoM5_ChORF_270b10.p1t_554</i>   | 1711          | 1794           | 1774           | 1759           |
| SpM18_ChORF0607_s_at   | <i>spyM18_0607</i>                   | <i>spyM18_0607</i>                   | 1775          | 1795           | 1761           | 1756           |
| SpM1_ChORF0547_s_at    | <i>spy0547</i>                       | <i>spy0547</i>                       | 1903          | 1796           | 1838           | 1825           |
| SpM1_ChORF1462_x_at    | <i>spy1462</i>                       | <i>spy1462</i>                       | 1729          | 1797           | 1804           | 1752           |

| Probe Set Name *        | Gene Name                   | Synonym                     | Rank<br>0 min | Rank<br>30 min | Rank<br>60 min | Rank<br>90 min |
|-------------------------|-----------------------------|-----------------------------|---------------|----------------|----------------|----------------|
|                         | <i>spyoM5_ChrORF_J7578C</i> | <i>SpyoM5_ChrORF_J7578C</i> |               |                |                |                |
| SpM5_ChORFJ7578C-298_at | <i>e05.s1c_298</i>          | <i>e05.s1c_298</i>          | 1844          | 1798           | 1834           | 1856           |
| SpM1_ChORF1451_s_at     | <i>spy1451</i>              | <i>spy1451</i>              | 1825          | 1799           | 1776           | 1693           |
| SpM1_ChORF1459_s_at     | <i>spy1459</i>              | <i>spy1459</i>              | 1824          | 1800           | 1827           | 1835           |
| SpM18_ChORF1803_at      | <i>spyM18_1803</i>          | <i>spyM18_1803</i>          | 1751          | 1801           | 1752           | 1666           |
| SpM3_ChORF0967_at       | <i>spyM3_0967</i>           | <i>SpyM3_0967</i>           | 1655          | 1802           | 1807           | 1793           |
| SpM18_ChORF1795_s_at    | <i>spyM18_1795</i>          | <i>spyM18_1795</i>          | 1767          | 1803           | 1765           | 1716           |
|                         | <i>spyoM12_ChrORF_299_1</i> | <i>SpyoM12_ChrORF_299_1</i> |               |                |                |                |
| SpM12_ChORF299-19_s_at  | <i>9</i>                    | <i>9</i>                    | 1722          | 1804           | 1832           | 1779           |
|                         | <i>spyoM12_ChrORF_292_1</i> | <i>SpyoM12_ChrORF_292_1</i> |               |                |                |                |
| SpM12_ChORF292-19_s_at  | <i>9</i>                    | <i>9</i>                    | 1807          | 1805           | 1784           | 1796           |
|                         | <i>spyoM12_ChrORF_286_3</i> | <i>SpyoM12_ChrORF_286_3</i> |               |                |                |                |
| SpM12_ChORF286-31_s_at  | <i>1</i>                    | <i>1</i>                    | 1828          | 1806           | 1805           | 1758           |
|                         | <i>spyoM49_ChrORF_sp001</i> | <i>SpyoM49_ChrORF_sp001</i> |               |                |                |                |
| SpM49_ChORF6658-4_s_at  | <i>_0_6658_4</i>            | <i>_0_6658_4</i>            | 1835          | 1807           | 1871           | 1890           |
|                         | <i>spyoM49_ChrORF_sp001</i> | <i>SpyoM49_ChrORF_sp001</i> |               |                |                |                |
| SpM49_ChORF7585-25_at   | <i>_0_7585_25</i>           | <i>_0_7585_25</i>           | 1852          | 1808           | 1793           | 1785           |
|                         | <i>spyoM5_ChrORF_125g01</i> | <i>SpyoM5_ChrORF_125g01</i> |               |                |                |                |
| SpM5_ChORF125g-172_at   | <i>q1ch_172</i>             | <i>.q1ch_172</i>            | 1821          | 1809           | 1863           | 1829           |
|                         | <i>spyoM5_ChrORF_125g01</i> | <i>SpyoM5_ChrORF_125g01</i> |               |                |                |                |
| SpM5_ChORF125g-177_at   | <i>q1ch_177</i>             | <i>.q1ch_177</i>            | 1822          | 1810           | 1845           | 1857           |
| SpM18_ChORF2063_at      | <i>spyM18_2063</i>          | <i>spyM18_2063</i>          | 1759          | 1811           | 1758           | 1862           |
| M12_0056_at             | <i>M12_0056</i>             | <i>M12_0056</i>             | 1752          | 1812           | 1792           | 1754           |
|                         | <i>spyoM5_ChrORF_125g01</i> | <i>SpyoM5_ChrORF_125g01</i> |               |                |                |                |
| SpM5_ChORF125g-225_at   | <i>q1ch_225</i>             | <i>.q1ch_225</i>            | 1798          | 1813           | 1842           | 1826           |
|                         | <i>spyoM49_ChrORF_sp001</i> | <i>SpyoM49_ChrORF_sp001</i> |               |                |                |                |
| SpM49_ChORF7585-35_at   | <i>_0_7585_35</i>           | <i>_0_7585_35</i>           | 1853          | 1814           | 1810           | 1808           |
|                         | <i>spyoM12_ChrORF_298_2</i> | <i>SpyoM12_ChrORF_298_2</i> |               |                |                |                |
| SpM12_ChORF298-21_at    | <i>1</i>                    | <i>1</i>                    | 1783          | 1815           | 1717           | 1713           |
|                         | <i>spyoM49_ChrORF_sp001</i> | <i>SpyoM49_ChrORF_sp001</i> |               |                |                |                |
| SpM49_ChORF7585-7_at    | <i>_0_7585_7</i>            | <i>_0_7585_7</i>            | 1762          | 1816           | 1813           | 1772           |
|                         | <i>spyoM49_ChrORF_sp001</i> | <i>SpyoM49_ChrORF_sp001</i> |               |                |                |                |
| SpM49_ChORF7585-23_at   | <i>_0_7585_23</i>           | <i>_0_7585_23</i>           | 1845          | 1817           | 1788           | 1773           |
| SpM1_ChORF1484_s_at     | <i>xis</i>                  | <i>spy1484</i>              | 1716          | 1818           | 1775           | 1719           |
|                         | <i>spyoM49_ChrORF_sp001</i> | <i>SpyoM49_ChrORF_sp001</i> |               |                |                |                |
| SpM49_ChORF7585-8_at    | <i>_0_7585_8</i>            | <i>_0_7585_8</i>            | 1753          | 1819           | 1830           | 1798           |
|                         | <i>spyoM12_ChrORF_267_1</i> | <i>SpyoM12_ChrORF_267_1</i> |               |                |                |                |
| SpM12_ChORF267-18_at    | <i>8</i>                    | <i>8</i>                    | 1841          | 1820           | 1779           | 1781           |
|                         | <i>spyoM5_ChrORF_270b10</i> | <i>SpyoM5_ChrORF_270b10</i> |               |                |                |                |
| SpM5_ChORF270b-605_s_at | <i>p1t_605</i>              | <i>.p1t_605</i>             | 1894          | 1821           | 1854           | 1807           |
| SpM1_ChORF1454_s_at     | <i>spy1454</i>              | <i>spy1454</i>              | 1843          | 1822           | 1831           | 1791           |
| SpM3_ChORF0986_x_at     | <i>spyM3_0986</i>           | <i>SpyM3_0986</i>           | 1789          | 1823           | 1853           | 1741           |
|                         | <i>spyoM49_ChrORF_sp001</i> | <i>SpyoM49_ChrORF_sp001</i> |               |                |                |                |
| SpM49_ChORF7585-27_at   | <i>_0_7585_27</i>           | <i>_0_7585_27</i>           | 1854          | 1824           | 1796           | 1774           |
| SpM1_ChORF0106_s_at     | <i>comYD</i>                | <i>spy0106</i>              | 1902          | 1825           | 1847           | 1892           |
|                         | <i>spyoM12_ChrORF_294_6</i> | <i>SpyoM12_ChrORF_294_6</i> |               |                |                |                |
| SpM12_ChORF294-6_s_at   | <i>spyM3_1258</i>           | <i>SpyM3_1258</i>           | 1826          | 1826           | 1812           | 1840           |
| SpyM3_1258_at           | <i>spyM3_1258</i>           | <i>SpyM3_1258</i>           | 1791          | 1827           | 1773           | 1708           |
| SpM1_ChORF1080_s_at     | <i>srtI</i>                 | <i>spy1080</i>              | 1799          | 1828           | 1821           | 1761           |
| M12_0466_at             | <i>M12_0466</i>             | <i>M12_0466</i>             | 1880          | 1829           | 1860           | 1909           |
| SpM1_ChORF0142_s_at     | <i>spy0142</i>              | <i>spy0142</i>              | 1814          | 1830           | 1719           | 1700           |
| SpM1_ChORF0677_s_at     | <i>spy0677</i>              | <i>spy0677</i>              | 1768          | 1831           | 1809           | 1742           |
| SpM1_ChORF1088_at       | <i>spy1088</i>              | <i>spy1088</i>              | 1815          | 1832           | 1846           | 1864           |
|                         | <i>spyoM49_ChrORF_sp001</i> | <i>SpyoM49_ChrORF_sp001</i> |               |                |                |                |
| SpM49_ChORF7585-28_at   | <i>_0_7585_28</i>           | <i>_0_7585_28</i>           | 1827          | 1833           | 1780           | 1802           |
| SpM1_ChORF1474_s_at     | <i>spy1474</i>              | <i>spy1474</i>              | 1806          | 1834           | 1876           | 1842           |
| SpM1_ChORF0628_s_at     | <i>spyM18_0693</i>          | <i>spyM18_0693</i>          | 1847          | 1835           | 1781           | 1721           |
|                         | <i>spyoM49_ChrORF_sp001</i> | <i>SpyoM49_ChrORF_sp001</i> |               |                |                |                |
| SpM49_ChORF7585-43_at   | <i>_0_7585_43</i>           | <i>_0_7585_43</i>           | 1830          | 1836           | 1839           | 1786           |
| SpM1_ChORF1444_s_at     | <i>spy1444</i>              | <i>spy1444</i>              | 1833          | 1837           | 1826           | 1814           |
| SpM1_ChORF1440_x_at     | <i>spy1440</i>              | <i>spy1440</i>              | 1863          | 1838           | 1848           | 1831           |



| Probe Set Name *          | Gene Name                               | Synonym                                 | Rank<br>0 min | Rank<br>30 min | Rank<br>60 min | Rank<br>90 min |
|---------------------------|-----------------------------------------|-----------------------------------------|---------------|----------------|----------------|----------------|
| SpM49_ChORF7585-29_at     | <i>spyoM49_ChrORF_sp001_0_7585_29</i>   | <i>SpyoM49_ChrORF_sp001_0_7585_29</i>   | 1856          | 1839           | 1814           | 1768           |
| SpM1_ChORF0478_s_at       | <i>spy0478</i>                          | <i>spy0478</i>                          | 1892          | 1840           | 1892           | 1914           |
| SpM5_ChORF270b-528_at     | <i>spyoM5_ChrORF_270b10.p1t_528</i>     | <i>SpyoM5_ChrORF_270b10.p1t_528</i>     | 1787          | 1841           | 1742           | 1778           |
| SpM3_ChORF0388_s_at       | <i>spy0545</i>                          | <i>spy0545</i>                          | 1905          | 1842           | 1861           | 1859           |
| SpM18_ChORF1493_at        | <i>spyM18_1493</i>                      | <i>spyM18_1493</i>                      | 1749          | 1843           | 1870           | 1878           |
| SpM1_ChORF0565_s_at       | <i>tnpA</i>                             | <i>spy0565</i>                          | 1866          | 1844           | 1887           | 1888           |
| SpM49_ChORF7585-42_at     | <i>spyoM49_ChrORF_sp001_0_7585_42</i>   | <i>SpyoM49_ChrORF_sp001_0_7585_42</i>   | 1868          | 1845           | 1850           | 1827           |
| SpM49_ChORF7585-34_s_at   | <i>spyoM49_ChrORF_sp001_0_7585_34</i>   | <i>SpyoM49_ChrORF_sp001_0_7585_34</i>   | 1876          | 1846           | 1843           | 1844           |
| SpM1_ChORF1479_s_at       | <i>spy1479</i>                          | <i>spy1479</i>                          | 1770          | 1847           | 1837           | 1783           |
| SpM49_ChORF7585-20_at     | <i>spyoM49_ChrORF_sp001_0_7585_20</i>   | <i>SpyoM49_ChrORF_sp001_0_7585_20</i>   | 1857          | 1848           | 1825           | 1813           |
| SpM1_ChORF0952_at         | <i>spy0952</i>                          | <i>spy0952</i>                          | 1718          | 1849           | 1852           | 1800           |
| SpM1_ChORF2084_s_at       | <i>spy2084</i>                          | <i>spy2084</i>                          | 1631          | 1850           | 1539           | 1156           |
| SpM3_ChORF0902_at         | <i>spyM3_0902</i>                       | <i>SpyM3_0902</i>                       | 1774          | 1851           | 1840           | 1839           |
| SpM49_ChORF7585-18_at     | <i>spyoM49_ChrORF_sp001_0_7585_18</i>   | <i>SpyoM49_ChrORF_sp001_0_7585_18</i>   | 1882          | 1852           | 1820           | 1811           |
| SpM5_ChORF275f-245_at     | <i>spyoM5_ChrORF_275f02.p1cq_245</i>    | <i>SpyoM5_ChrORF_275f02.p1cq_245</i>    | 1898          | 1853           | 1883           | 1907           |
| SpM18_ChORF1162_s_at      | <i>rnhB</i>                             | <i>spyM18_1162</i>                      | 1908          | 1854           | 1875           | 1906           |
| SpM18_ChORF1237_x_at      | <i>spyM18_1237</i>                      | <i>spyM18_1237</i>                      | 1829          | 1855           | 1791           | 1715           |
| SpM1_ChORF1447_at         | <i>spy1447</i>                          | <i>spy1447</i>                          | 1878          | 1856           | 1864           | 1843           |
| SpM3_ChORF0757_s_at       | <i>spyM3_0757</i>                       | <i>SpyM3_0757</i>                       | 1869          | 1857           | 1829           | 1767           |
| M12_1862_s_at             | <i>M12_1862</i>                         | <i>M12_1862</i>                         | 1839          | 1858           | 1818           | 1869           |
| SpyM3_1439_at             | <i>spyM3_1439</i>                       | <i>SpyM3_1439</i>                       | 1777          | 1859           | 1865           | 1836           |
| SpM1_ChORF1457_s_at       | <i>spy1457</i>                          | <i>spy1457</i>                          | 1872          | 1860           | 1836           | 1821           |
| SpM18_ChORF1498_x_at      | <i>spyM18_1498</i>                      | <i>spyM18_1498</i>                      | 1738          | 1861           | 1867           | 1852           |
| SpM5_ChORF270b-69_s_at    | <i>spyoM5_ChrORF_270b10.p1t_69</i>      | <i>SpyoM5_ChrORF_270b10.p1t_69</i>      | 1910          | 1862           | 1797           | 1847           |
| SpM5_ChORFJ7578C-142_s_at | <i>spyoM5_ChrORF_J7578C.e05.s1c_142</i> | <i>SpyoM5_ChrORF_J7578C.e05.s1c_142</i> | 1891          | 1863           | 1857           | 1889           |
| M12_1863_s_at             | <i>M12_1863</i>                         | <i>M12_1863</i>                         | 1846          | 1864           | 1851           | 1834           |
| SpM1_ChORF1118_s_at       | <i>radC</i>                             | <i>spy1118</i>                          | 1881          | 1865           | 1823           | 1812           |
| SpM12_ChORF257-16_s_at    | <i>spyoM12_ChrORF_257_1_6</i>           | <i>SpyoM12_ChrORF_257_1_6</i>           | 1860          | 1866           | 1868           | 1815           |
| SpM1_ChORF1438_s_at       | <i>spy1438</i>                          | <i>spy1438</i>                          | 1874          | 1867           | 1849           | 1805           |
| SpM1_ChORF1450_s_at       | <i>spy1450</i>                          | <i>spy1450</i>                          | 1873          | 1868           | 1844           | 1782           |
| SpM12_ChORF299-3_s_at     | <i>spyoM12_ChrORF_299_3</i>             | <i>SpyoM12_ChrORF_299_3</i>             | 1816          | 1869           | 1859           | 1846           |
| SpM12_ChORF297-3_s_at     | <i>spyoM12_ChrORF_297_3</i>             | <i>SpyoM12_ChrORF_297_3</i>             | 1848          | 1870           | 1872           | 1879           |
| SpM1_ChORF1443_s_at       | <i>spy1443</i>                          | <i>spy1443</i>                          | 1870          | 1871           | 1833           | 1740           |
| SpM3_ChORF0964_at         | <i>spyM3_0964</i>                       | <i>SpyM3_0964</i>                       | 1831          | 1872           | 1819           | 1797           |
| SpM5_ChORF169a-232_at     | <i>spyoM5_ChrORF_169a5.p1t_232</i>      | <i>SpyoM5_ChrORF_169a5.p1t_232</i>      | 1875          | 1873           | 1893           | 1865           |
| SpM12_ChORF289-43_s_at    | <i>spyoM12_ChrORF_289_4_3</i>           | <i>SpyoM12_ChrORF_289_4_3</i>           | 1850          | 1874           | 1874           | 1806           |
| SpyM3_1303_at             | <i>spyM3_1303</i>                       | <i>SpyM3_1303</i>                       | 1888          | 1875           | 1873           | 1863           |
| SpM12_ChORF296-1_s_at     | <i>spyoM12_ChrORF_296_1</i>             | <i>SpyoM12_ChrORF_296_1</i>             | 1865          | 1876           | 1888           | 1868           |
| SpM1_ChORF1448_s_at       | <i>spy1448</i>                          | <i>spy1448</i>                          | 1887          | 1877           | 1858           | 1818           |
| SpM12_ChORF262-4_s_at     | <i>spyoM12_ChrORF_262_4</i>             | <i>SpyoM12_ChrORF_262_4</i>             | 1877          | 1878           | 1862           | 1893           |
| SpM12_ChORF265-2_s_at     | <i>spyoM12_ChrORF_265_2</i>             | <i>SpyoM12_ChrORF_265_2</i>             | 1867          | 1879           | 1902           | 1870           |
| SpM1_ChORF1471_x_at       | <i>spy1471</i>                          | <i>spy1471</i>                          | 1811          | 1880           | 1886           | 1882           |
| SpM12_ChORF247-14_s_at    | <i>spyoM12_ChrORF_247_1_4</i>           | <i>SpyoM12_ChrORF_247_1_4</i>           | 1885          | 1881           | 1881           | 1898           |
| M12_0652_at               | <i>M12_0652</i>                         | <i>M12_0652</i>                         | 1883          | 1882           | 1855           | 1886           |

| Probe Set Name *          | Gene Name                   | Synonym                    | Rank<br>0 min | Rank<br>30 min | Rank<br>60 min | Rank<br>90 min |
|---------------------------|-----------------------------|----------------------------|---------------|----------------|----------------|----------------|
| SpM1_ChORF0147_s_at       | <i>spy0147</i>              | <i>spy0147</i>             | 1726          | 1883           | 1676           | 1686           |
|                           | <i>spyoM12_ChORF_284_4</i>  | <i>SpyoM12_ChORF_284_4</i> |               |                |                |                |
| SpM12_ChORF284-43_s_at    | 3                           | 3                          | 1886          | 1884           | 1869           | 1849           |
| M12_0158_at               | M12_0158                    | M12_0158                   | 1855          | 1885           | 1885           | 1891           |
| SpM1_ChORF0957_s_at       | <i>spy0957</i>              | <i>spy0957</i>             | 1776          | 1886           | 1889           | 1884           |
|                           | <i>spyoM5_ChORF_125g01</i>  | <i>SpyoM5_ChORF_125g01</i> |               |                |                |                |
| SpM5_ChORF125g-147_at     | <i>q1ch_147</i>             | <i>.q1ch_147</i>           | 1864          | 1887           | 1866           | 1832           |
|                           | <i>spyoM5_ChORF_J7578C</i>  | <i>SpyoM5_ChORF_J7578C</i> |               |                |                |                |
| SpM5_ChORFJ7578C-203_s_at | <i>e05.s1c_203</i>          | <i>e05.s1c_203</i>         | 1780          | 1888           | 1884           | 1875           |
| SpM18_ChORF0551_s_at      | <i>silE</i>                 | <i>spyM18_0551</i>         | 1859          | 1889           | 1894           | 1896           |
|                           | <i>spyoM5_ChORF_125g01</i>  | <i>SpyoM5_ChORF_125g01</i> |               |                |                |                |
| SpM5_ChORF125g-178_at     | <i>q1ch_178</i>             | <i>.q1ch_178</i>           | 1896          | 1890           | 1890           | 1908           |
| SpM1_ChORF0953_s_at       | <i>spy0953</i>              | <i>spy0953</i>             | 1804          | 1891           | 1877           | 1828           |
|                           | <i>spyoM12_ChORF_278_2</i>  | <i>SpyoM12_ChORF_278_2</i> |               |                |                |                |
| SpM12_ChORF278-26_s_at    | 6                           | 6                          | 1812          | 1892           | 1879           | 1874           |
| SpM1_ChORF1478_s_at       | <i>spy1478</i>              | <i>spy1478</i>             | 1788          | 1893           | 1895           | 1872           |
| SpM18_ChORF1591_s_at      | <i>spyM18_1591</i>          | <i>spyM18_1591</i>         | 1849          | 1894           | 1891           | 1871           |
|                           | <i>spyoM49_ChORF_sp001</i>  | <i>SpyoM49_ChORF_sp001</i> |               |                |                |                |
| SpM49_ChORF7585-10_s_at   | <i>_0_7585_10</i>           | <i>_0_7585_10</i>          | 1817          | 1895           | 1900           | 1881           |
| SpM12_ChORF262-1_s_at     | <i>spyoM12_ChORF_262_1</i>  | <i>SpyoM12_ChORF_262_1</i> | 1900          | 1896           | 1906           | 1899           |
| SpM12_ChORF262-3_s_at     | <i>spyoM12_ChORF_262_3</i>  | <i>SpyoM12_ChORF_262_3</i> | 1899          | 1897           | 1901           | 1910           |
| SpM1_ChORF2041_s_at       | <i>spy2041</i>              | <i>spy2041</i>             | 1904          | 1898           | 1905           | 1902           |
|                           | <i>spyoM5_ChORF_169a5.p</i> | <i>SpyoM5_ChORF_169a5</i>  |               |                |                |                |
| SpM5_ChORF169a-227_s_at   | <i>1t_227</i>               | <i>p1t_227</i>             | 1890          | 1899           | 1896           | 1901           |
| SpM1_ChORF1077_s_at       | <i>spy1077</i>              | <i>spy1077</i>             | 1871          | 1900           | 1878           | 1860           |
|                           | <i>spyoM12_ChORF_257_1</i>  | <i>SpyoM12_ChORF_257_1</i> |               |                |                |                |
| SpM12_ChORF257-17_s_at    | 7                           | 7                          | 1897          | 1901           | 1898           | 1876           |
|                           | <i>spyoM12_ChORF_288_4</i>  | <i>SpyoM12_ChORF_288_4</i> |               |                |                |                |
| SpM12_ChORF288-43_s_at    | 3                           | 3                          | 1907          | 1902           | 1912           | 1915           |
| SpM18_ChORF0886_s_at      | <i>epuA</i>                 | <i>spyM18_0886</i>         | 1889          | 1903           | 1910           | 1911           |
| SpM18_ChORF1283_x_at      | <i>spyM18_1283</i>          | <i>spyM18_1283</i>         | 1906          | 1904           | 1899           | 1887           |
| SpM1_ChORF0578_s_at       | <i>spy0578</i>              | <i>spy0578</i>             | 1901          | 1905           | 1903           | 1885           |
| SpM3_ChORF1136_s_at       | <i>spyM3_1136</i>           | <i>SpyM3_1136</i>          | 1818          | 1906           | 1897           | 1903           |
| SpM1_ChORF1957_s_at       | <i>spy1957</i>              | <i>spy1957</i>             | 1879          | 1907           | 1880           | 1877           |
| M12_1829_s_at             | M12_1829                    | M12_1829                   | 1893          | 1908           | 1915           | 1917           |
| SpM18_ChORF1789_s_at      | <i>spyM18_1789</i>          | <i>spyM18_1789</i>         | 1895          | 1909           | 1909           | 1880           |
| SpM18_ChORF1460_s_at      | <i>spyM18_1460</i>          | <i>spyM18_1460</i>         | 1916          | 1910           | 1908           | 1900           |
| SpyM3_1308_x_at           | <i>spyM3_1308</i>           | <i>SpyM3_1308</i>          | 1911          | 1911           | 1904           | 1873           |
| SpM1_ChORF1452_s_at       | <i>spy1452</i>              | <i>spy1452</i>             | 1913          | 1912           | 1913           | 1897           |
| M12_0138_s_at             | M12_0138                    | M12_0138                   | 1918          | 1913           | 1920           | 1918           |
|                           | <i>spyoM5_ChORF_223b3.p</i> | <i>SpyoM5_ChORF_223b3</i>  |               |                |                |                |
| SpM5_ChORF223b-1_s_at     | <i>1t_1</i>                 | <i>p1t_1</i>               | 1909          | 1914           | 1914           | 1894           |
| SpM3_ChORF1098_at         | <i>cadA</i>                 | <i>SpyM3_1098</i>          | 1912          | 1915           | 1911           | 1913           |
| SpM3_ChORF1081_s_at       | <i>spyM3_1081</i>           | <i>SpyM3_1081</i>          | 1915          | 1916           | 1916           | 1904           |
| SpM18_ChORF0453_at        | <i>spyM18_0453</i>          | <i>spyM18_0453</i>         | 1919          | 1917           | 1919           | 1916           |
|                           | <i>spyoM5_ChORF_270b10</i>  | <i>SpyoM5_ChORF_270b10</i> |               |                |                |                |
| SpM5_ChORF270b-585_at     | <i>p1t_585</i>              | <i>.p1t_585</i>            | 1917          | 1918           | 1917           | 1919           |
| SpM1_ChORF1532_s_at       | <i>spy1532</i>              | <i>spy1532</i>             | 1920          | 1919           | 1918           | 1920           |
| SpM18_ChORF1790_s_at      | <i>spyM18_1790</i>          | <i>spyM18_1790</i>         | 1914          | 1920           | 1907           | 1905           |
| SpM3_ChORF0954_s_at       | <i>spyM3_0954</i>           | <i>SpyM3_0954</i>          | 1921          | 1921           | 1921           | 1921           |
|                           | <i>spyoM5_ChORF_270b10</i>  | <i>SpyoM5_ChORF_270b10</i> |               |                |                |                |
| SpM5_ChORF270b-141_at     | <i>p1t_141</i>              | <i>.p1t_141</i>            | 1923          | 1922           | 1923           | 1924           |
| SpM1_ChORF0137_s_at       | <i>atoE</i>                 | <i>spy0137</i>             | 1924          | 1923           | 1924           | 1925           |
| SpM1_ChORF0628_at         | <i>spy0628</i>              | <i>spy0628</i>             | 1922          | 1924           | 1922           | 1922           |
| SpM1_ChORF1087_s_at       | <i>srtG</i>                 | <i>spy1087</i>             | 1925          | 1925           | 1925           | 1923           |

\*Probe sets listed according to transcript rank (in ascending order), based on average WT expression estimates at time 30
