# Supplementary material
Source: PubMed Central journal article supplement (PMC1602339)

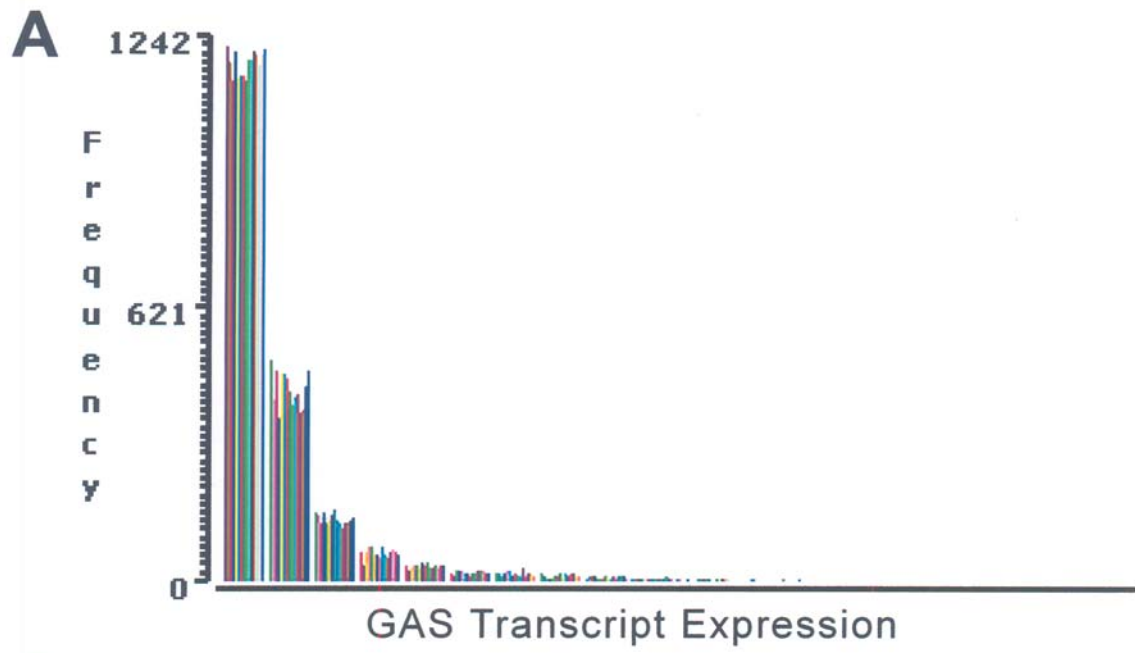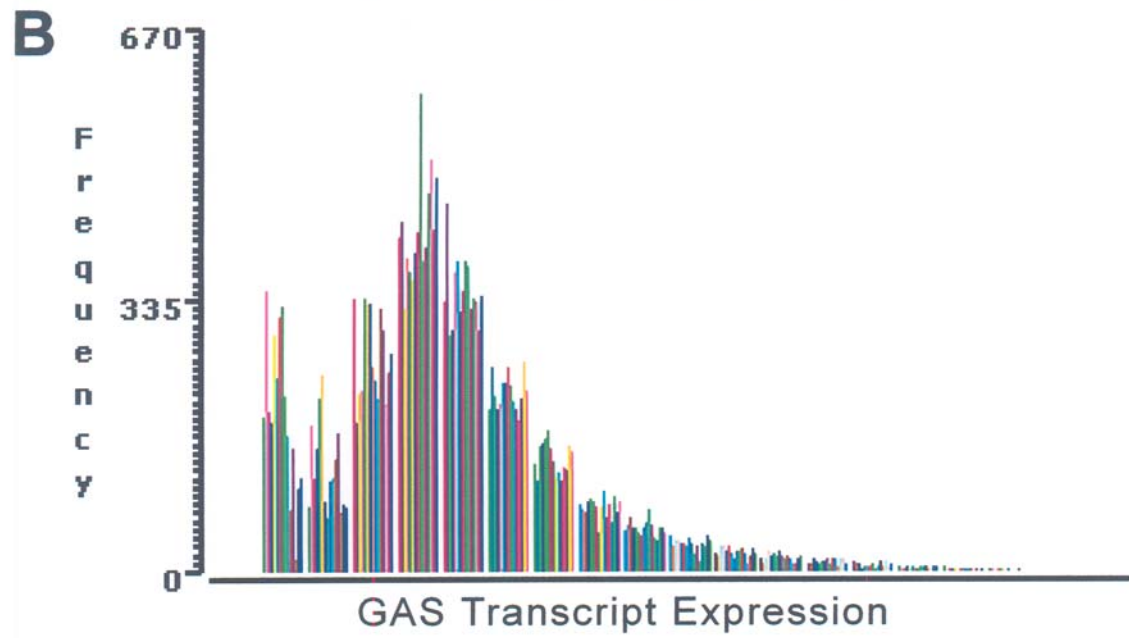

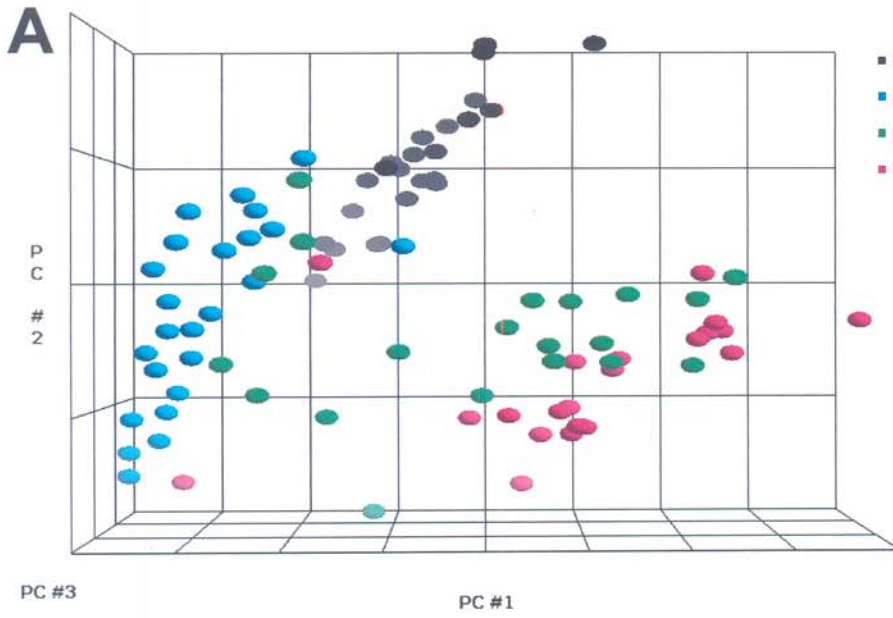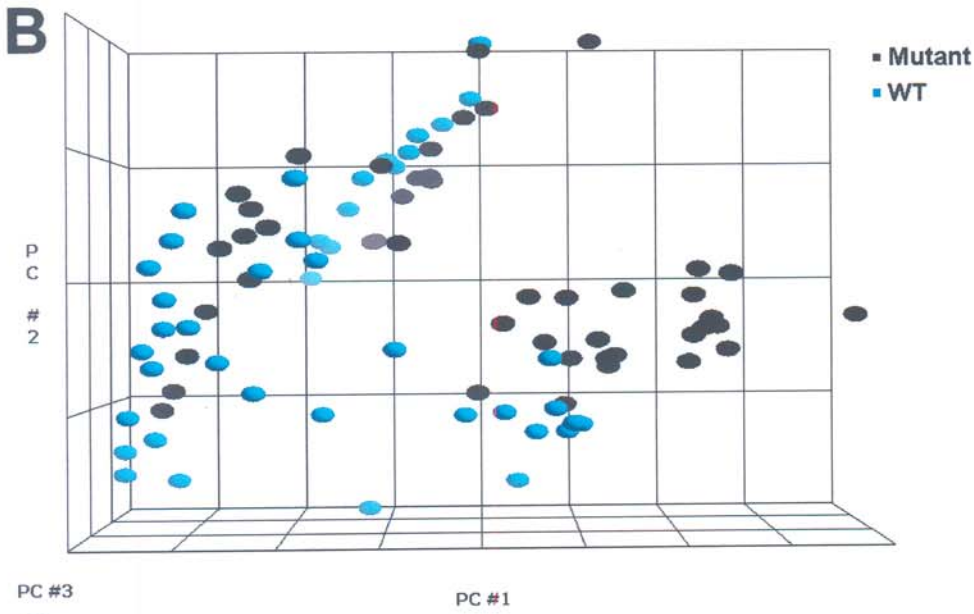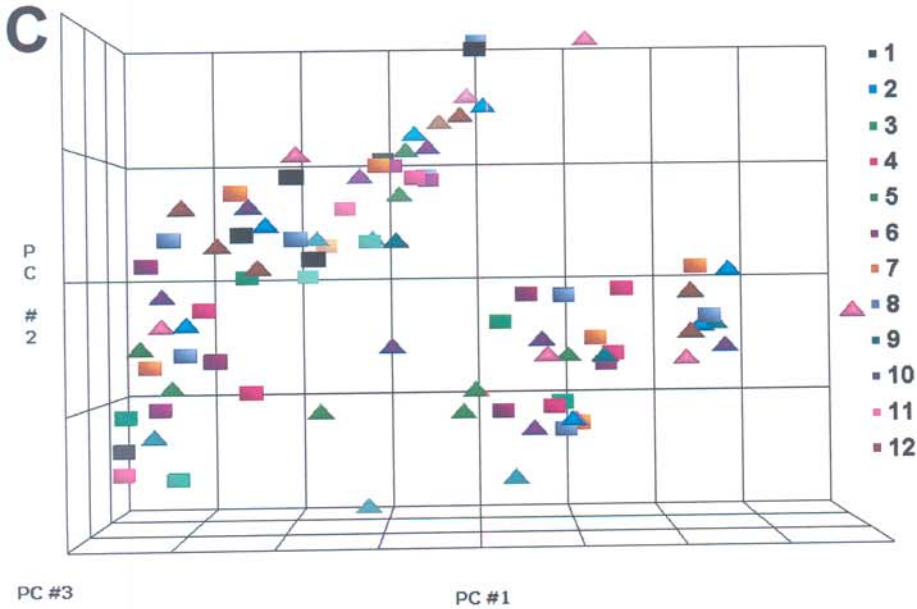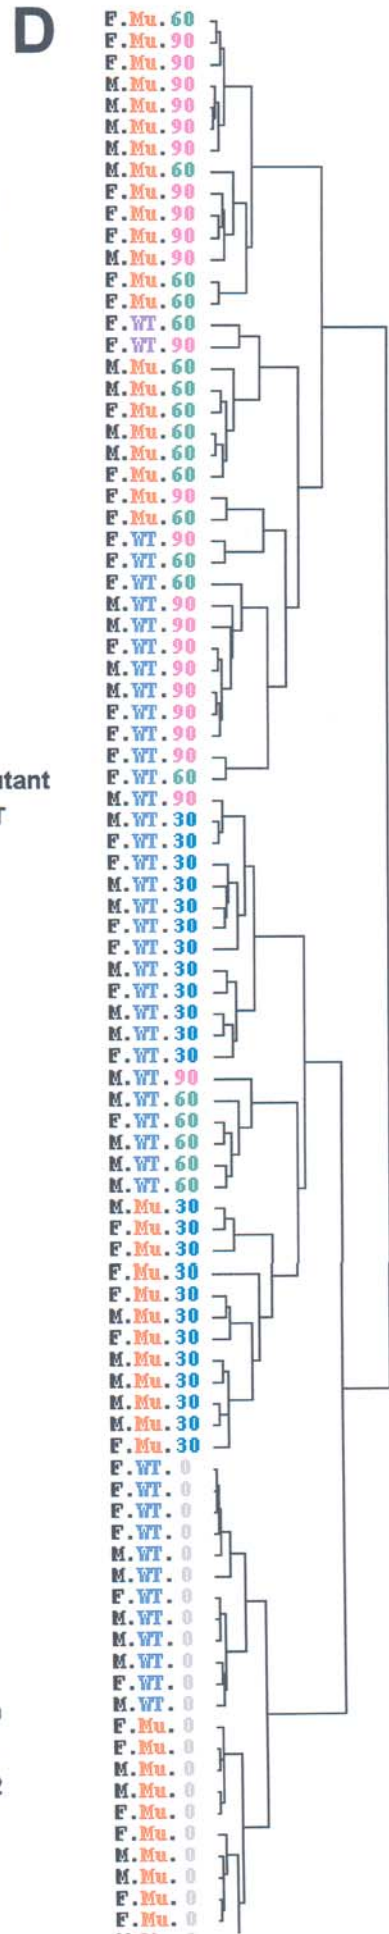

**A**

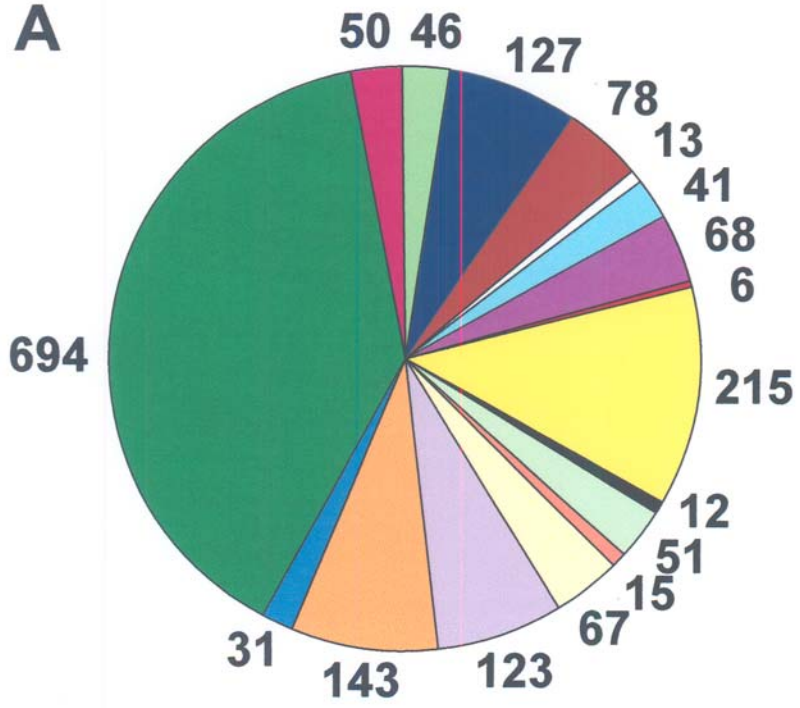

- Amino acid metabolism
- Carbohydrate metabolism
- Cell envelope
- Cell shape & cell division
- Cofactors
- DNA metabolism
- Lipid metabolism
- Membrane transport
- Mobile genetic element
- Nucleotides
- Other
- Phage
- Protein synthesis
- RNA metabolism
- Stress adaptation
- Unknown
- Virulence-associated

**B**

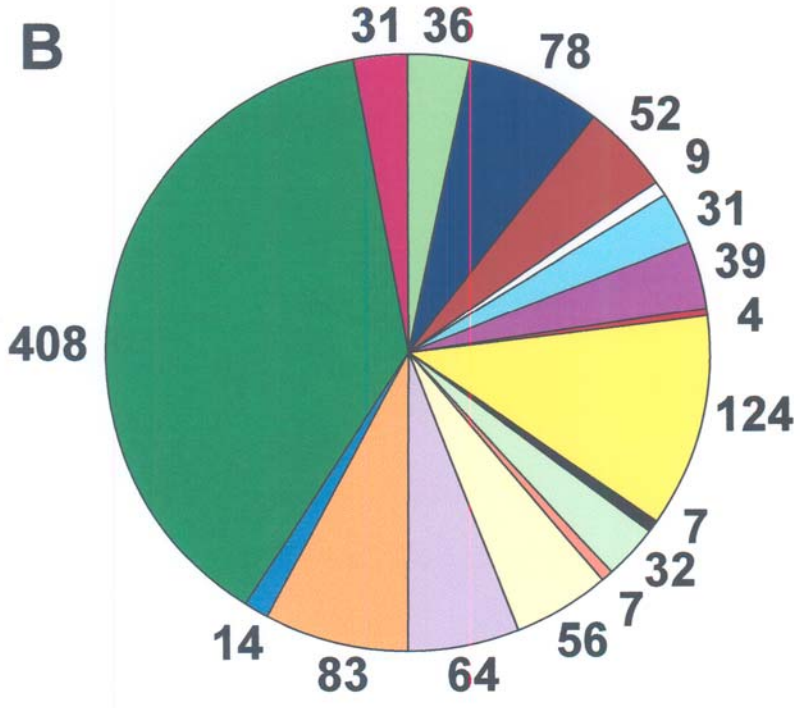

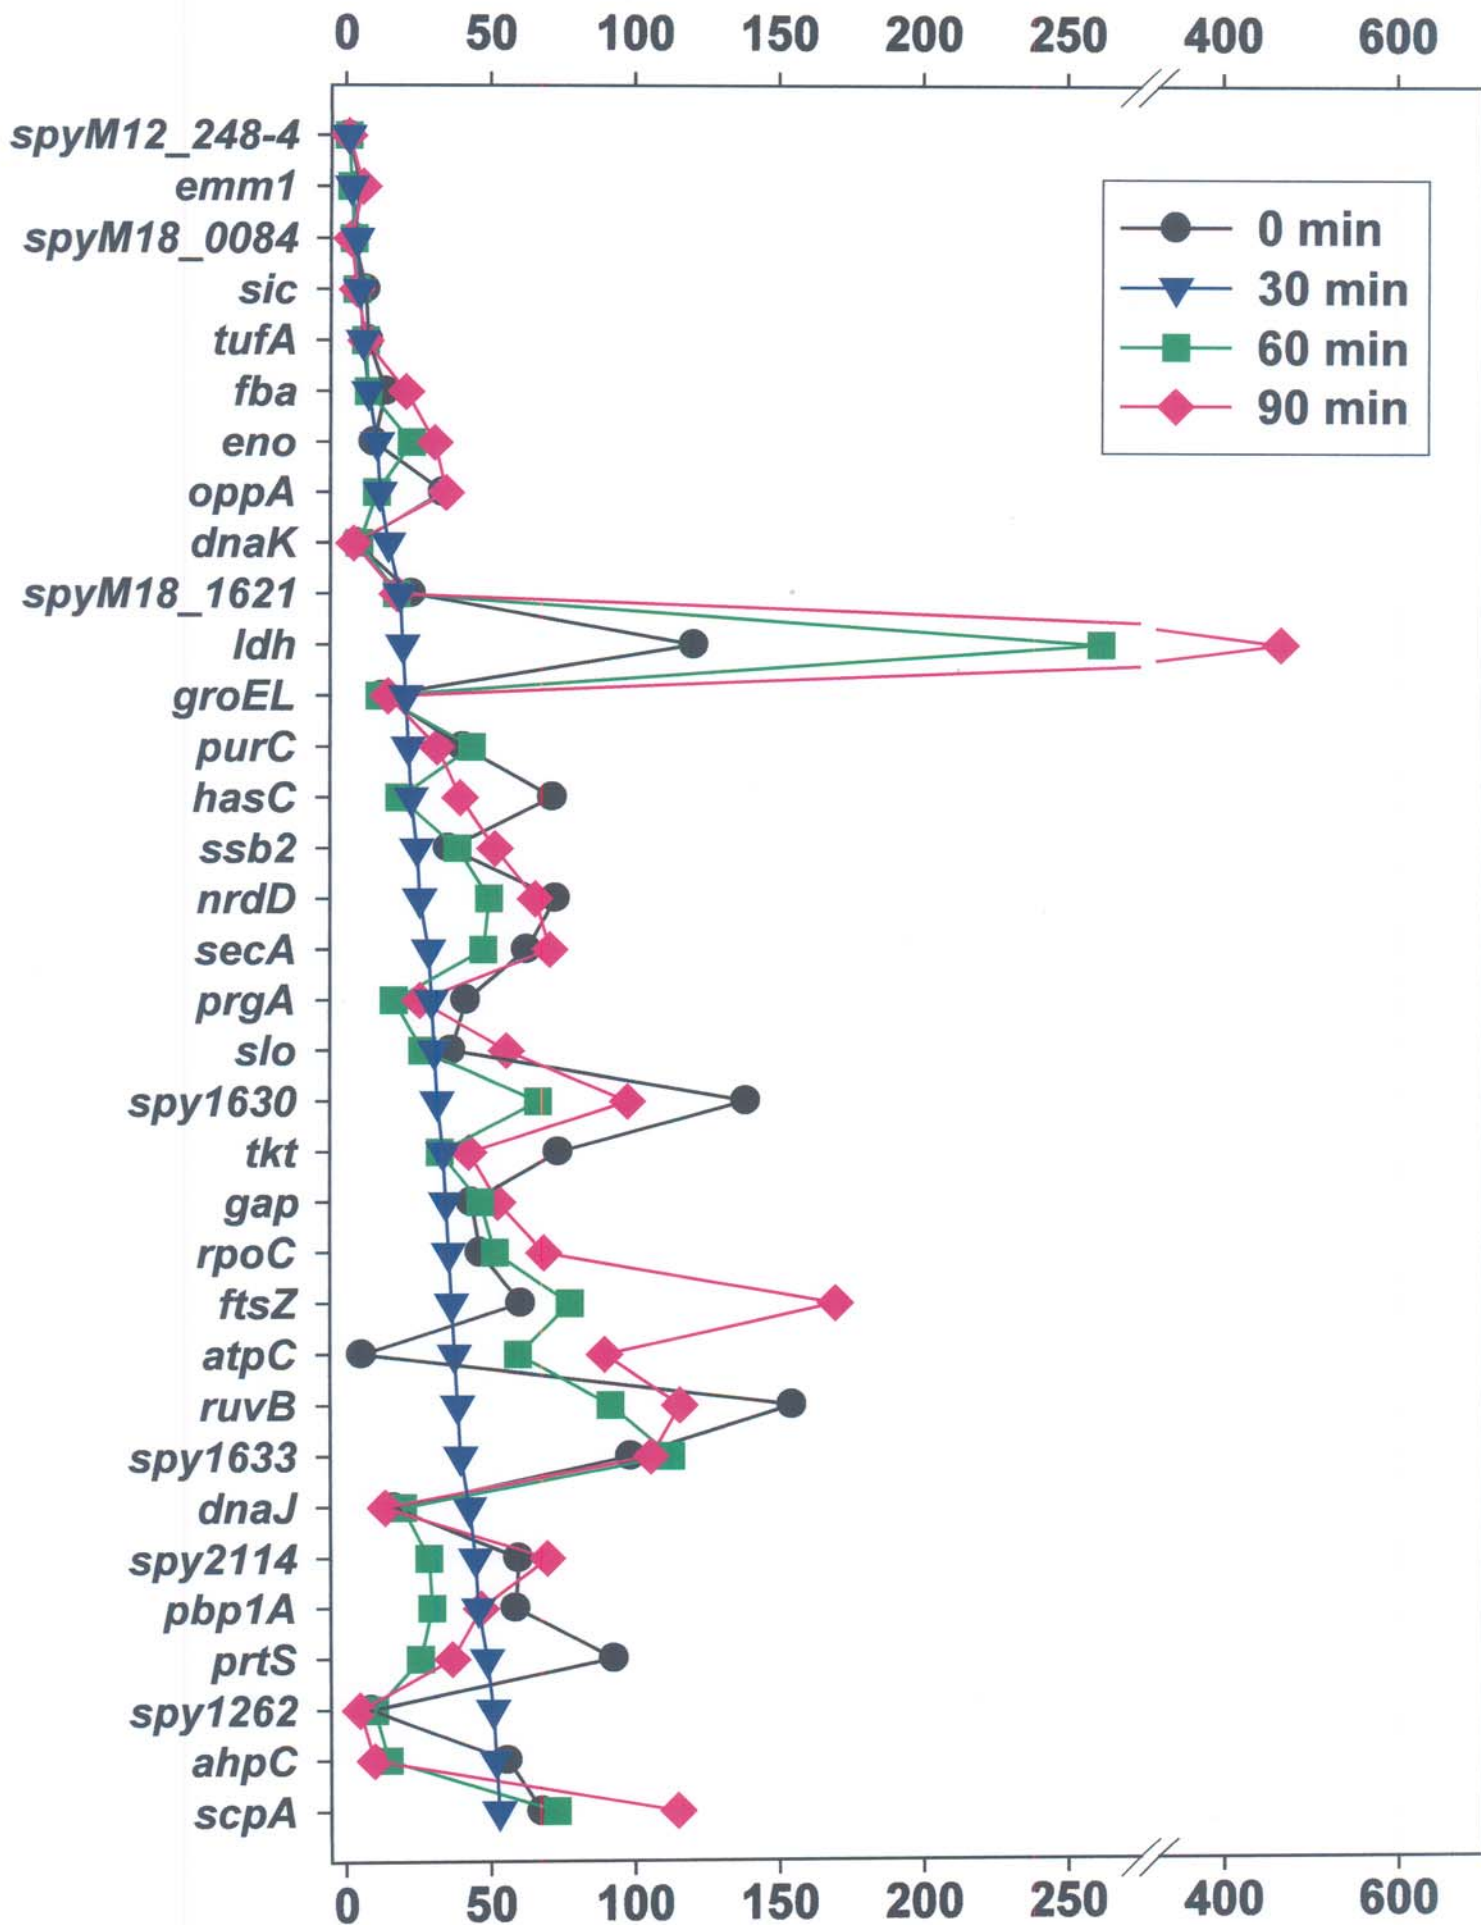



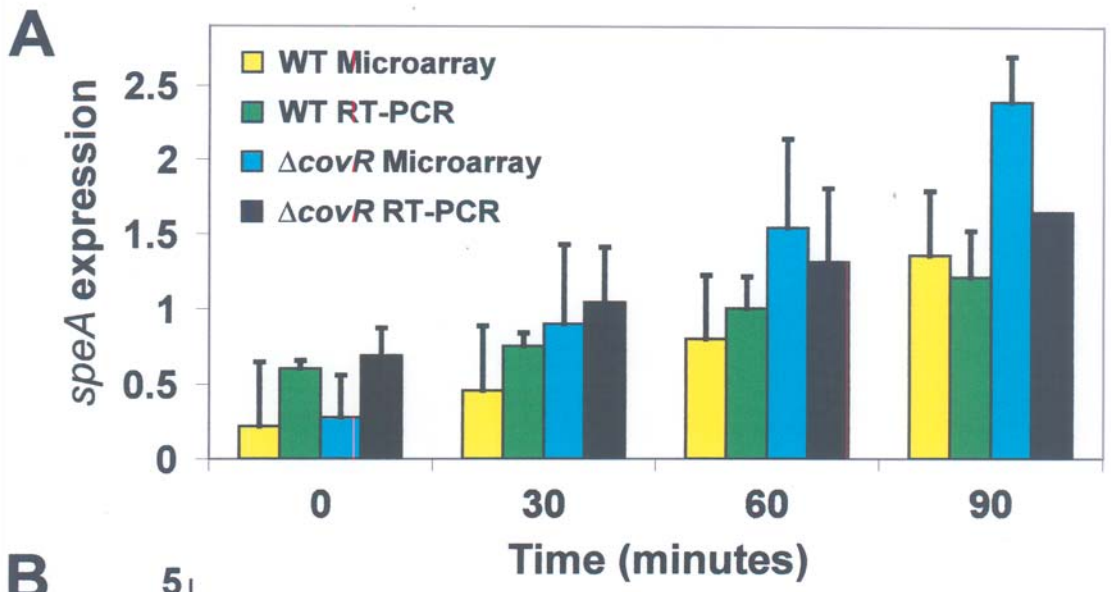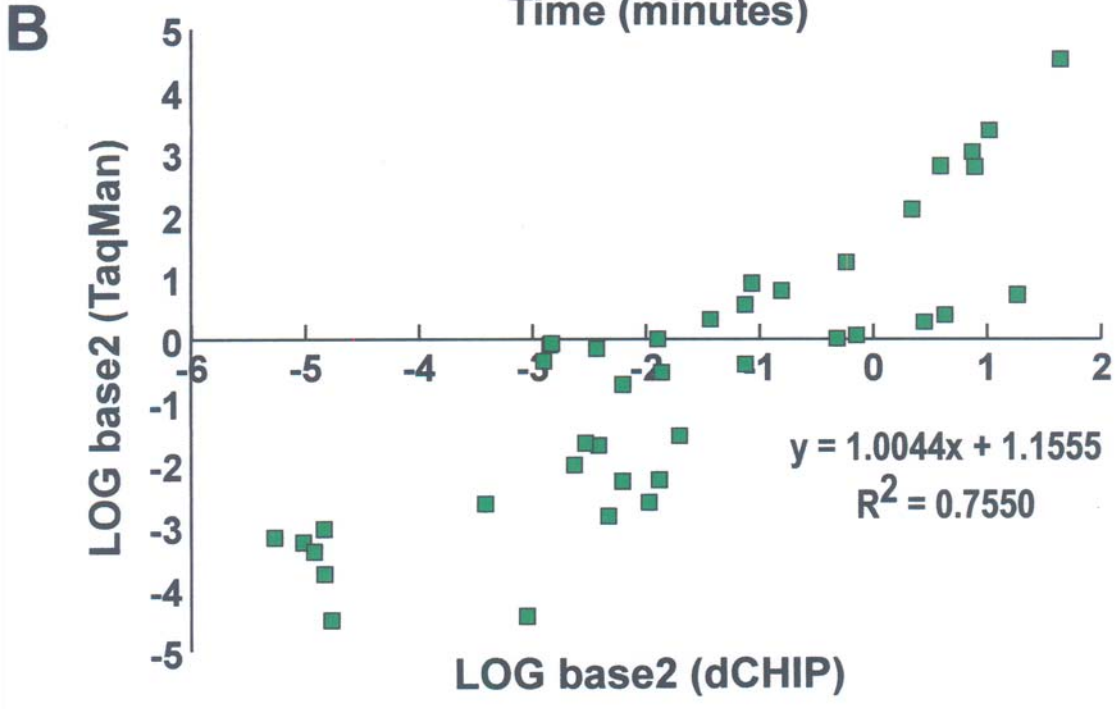

**A**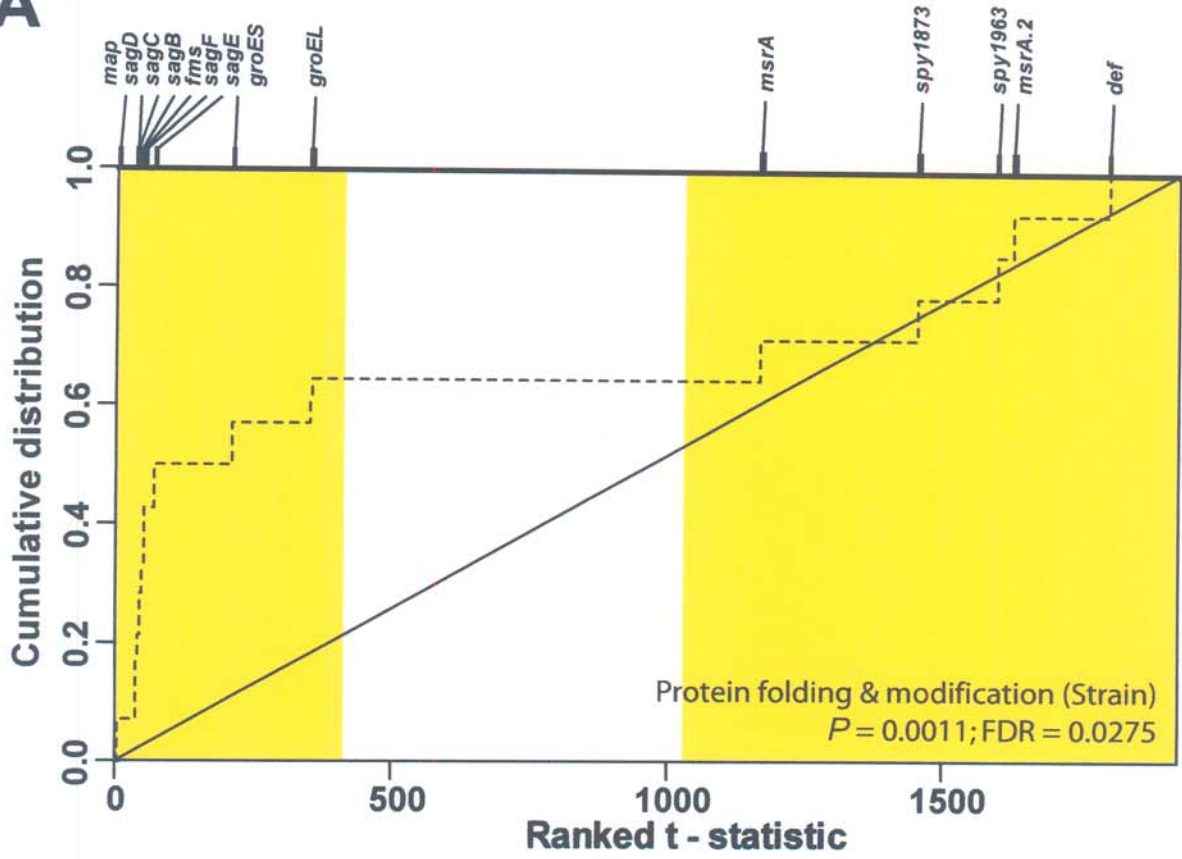**B**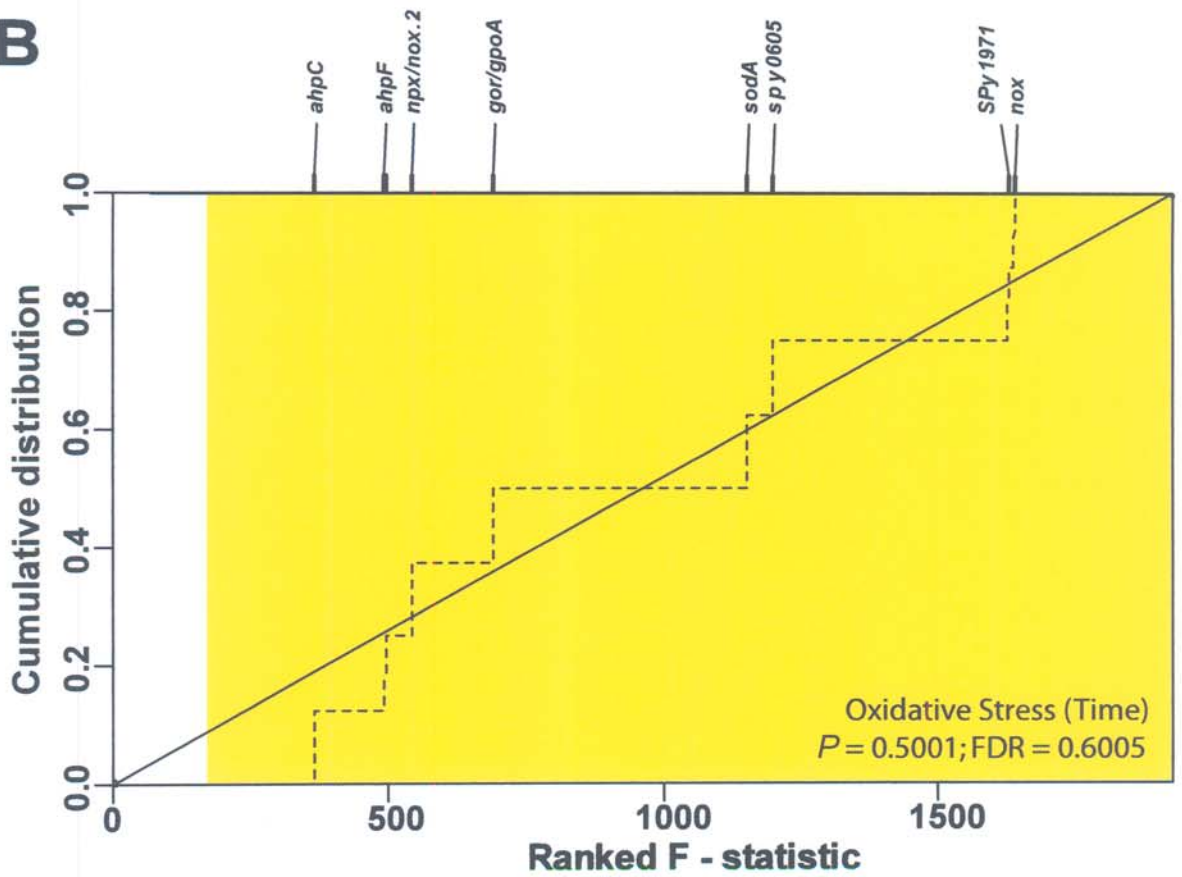

Supplement: amjpathol_166_2_455__2.pdf [file amjpathol_166_2_455__2.pdf]
